# Supplementary material for: Renal Endothelial Single-Cell Transcriptomics Reveals Spatiotemporal Regulation and Divergent Roles of Differential Gene Transcription and Alternative Splicing in Murine Diabetic Nephropathy
Source: Preprints.org preprint supplement (doi:10.20944/preprints202403.1481.v1), 2024-03-25
Supplement: Supplementary file 1 [file supplementary]

## Sheet: Sheet 1
	Genes	AA_cluster	AA_pct.1	AA_pct.2	AA_avg_logFC	AA_p_val	AA_p_val_adj	GE1_cluster	GE1_pct.1	GE1_pct.2	GE1_avg_logFC	GE1_p_val	GE1_p_val_adj	GE2_cluster	GE2_pct.1	GE2_pct.2	GE2_avg_logFC	GE2_p_val	GE2_p_val_adj	EA_cluster	EA_pct.1	EA_pct.2	EA_avg_logFC	EA_p_val	EA_p_val_adj	DVR_cluster	DVR_pct.1	DVR_pct.2	DVR_avg_logFC	DVR_p_val	DVR_p_val_adj	AVR_cluster	AVR_pct.1	AVR_pct.2	AVR_avg_logFC	AVR_p_val	AVR_p_val_adj	PCEC1_cluster	PCEC1_pct.1	PCEC1_pct.2	PCEC1_avg_logFC	PCEC1_p_val	PCEC1_p_val_adj	PCEC2_cluster	PCEC2_pct.1	PCEC2_pct.2	PCEC2_avg_logFC	PCEC2_p_val	PCEC2_p_val_adj
1	0610005C13Rik																									DVR	0.178	0.1	0.354722	2.31045e-06	0.0687011							PCEC1	0.083	0.118	0.166803	9.63375e-05	1
2	0610007P14Rik	AA	0.409	0.3	0.136447	0.00119088	1																									AVR	0.212	0.315	-0.334919	2.71137e-07	0.00806226	PCEC1	0.244	0.339	0.0143093	4.69049e-11	1.39472e-06	PCEC2	0.537	0.278	-0.0202525	1.13491e-33	3.37464e-29
3	0610009B22Rik																															AVR	0.148	0.195	-0.334672	0.00484112	1	PCEC1	0.151	0.212	0.0761229	3.16205e-07	0.00940236	PCEC2	0.344	0.173	0.0522473	9.04807e-20	2.69044e-15
4	0610009E02Rik	AA	0.605	0.42	0.832744	2.55102e-11	7.58545e-07	GE1	0.468	0.423	0.102102	0.00989075	1	GE2	0.501	0.419	0.367204	7.43346e-06	0.221034																			PCEC1	0.359	0.466	-0.278499	1.25183e-15	3.72232e-11	PCEC2	0.568	0.411	0.105994	6.55219e-10	1.94829e-05
5	0610009O20Rik	AA	0.53	0.594	-0.790982	0.00635423	1													EA	0.503	0.597	-0.656814	4.91668e-06	0.146197	DVR	0.513	0.597	-0.782303	2.8471e-05	0.846585	AVR	0.504	0.601	-0.00797683	6.17929e-05	1							PCEC2	0.861	0.561	0.0732487	1.24721e-35	3.70857e-31
6	0610010F05Rik																																					PCEC1	0.126	0.209	-0.130973	1.13728e-13	3.3817e-09	PCEC2	0.322	0.162	0.31382	3.89216e-19	1.15733e-14
7	0610010K14Rik																																					PCEC1	0.548	0.683	-0.126025	4.02086e-17	1.1956e-12	PCEC2	0.89	0.605	0.200857	5.68781e-26	1.69127e-21
8	0610011F06Rik							GE1	0.153	0.205	-0.198859	0.00838032	1	GE2	0.158	0.205	-0.831464	0.00232448	1							DVR	0.292	0.194	0.569974	9.10344e-07	0.0270691	AVR	0.15	0.206	-0.552411	0.000818444	1	PCEC1	0.159	0.224	0.224293	1.87707e-07	0.00558146	PCEC2	0.414	0.176	0.36264	7.04718e-39	2.09548e-34
9	0610012D04Rik																																											PCEC2	0.005	0.001	0.0840786	0.00408279	1
10	0610012G03Rik																															AVR	0.356	0.448	-0.273789	1.3763e-05	0.409242	PCEC1	0.366	0.48	-0.0262488	3.21399e-11	9.5568e-07	PCEC2	0.745	0.404	0.382191	4.69128e-37	1.39495e-32
11	0610025J13Rik
12	0610030E20Rik																																					PCEC1	0.257	0.34	0.234086	1.90063e-07	0.00565152	PCEC2	0.582	0.279	0.0980924	2.47105e-45	7.34767e-41
13	0610031O16Rik	AA	0.312	0.02	1.97654	2.49679e-133	7.42422e-129							GE2	0.005	0.034	-0.334469	0.000214938	1																			PCEC1	0.017	0.039	-0.337813	2.0489e-06	0.060924	PCEC2	0.056	0.028	-0.0634765	0.000549311	1
14	0610037L13Rik																															AVR	0.487	0.576	-0.0304913	5.7305e-05	1	PCEC1	0.484	0.614	-0.0162766	1.12934e-15	3.35809e-11	PCEC2	0.857	0.534	0.273291	1.02446e-44	3.04624e-40
15	0610038B21Rik																																					PCEC1	0.015	0.026	-0.134729	0.00841292	1
16	0610039K10Rik	AA	0.879	0.828	0.124246	0.000259674	1	GE1	0.859	0.827	0.226393	3.81182e-07	0.0113345	GE2	0.862	0.826	0.0546286	0.00511794	1	EA	0.756	0.835	-0.556816	1.74714e-19	5.19512e-15	DVR	0.825	0.83	-0.304788	3.51728e-07	0.0104586
17	0610040B10Rik																															AVR	0.026	0.055	-0.40509	0.00244346	1							PCEC2	0.081	0.049	-0.012864	0.00129503	1
18	0610040F04Rik	AA	0.33	0.251	0.166303	0.00713109	1	GE1	0.172	0.262	-0.648406	5.36374e-06	0.159491																			AVR	0.453	0.23	1.22044	2.22479e-42	6.61542e-38	PCEC1	0.169	0.302	-0.499303	6.0711e-27	1.80524e-22	PCEC2	0.329	0.245	-0.263705	0.00285719	1
19	1010001B22Rik																																											PCEC2	0.022	0.009	0.0195728	0.00504814	1
20	1010001N08Rik	AA	0.116	0.005	1.62415	5.80133e-64	1.72503e-59																															PCEC1	0.001	0.014	-0.292725	3.56608e-07	0.0106037
21	1110001J03Rik	AA	0.284	0.211	0.270848	0.00744126	1																			DVR	0.27	0.209	0.10183	0.00546993	1	AVR	0.139	0.222	-0.495908	3.49355e-06	0.103881	PCEC1	0.158	0.245	-0.0450788	5.96724e-13	1.77436e-08	PCEC2	0.356	0.197	0.123394	1.51143e-15	4.49423e-11
22	1110002J07Rik																																											PCEC2	0.014	0.005	0.00181362	0.00934365	1
23	1110002L01Rik																																					PCEC1	0.146	0.188	0.0541449	0.000229291	1	PCEC2	0.269	0.162	0.209715	5.19786e-09	0.000154558
24	1110004E09Rik																																					PCEC1	0.211	0.305	-0.0278831	5.75105e-12	1.71008e-07	PCEC2	0.537	0.24	0.0542051	1.32268e-44	3.933e-40
25	1110004F10Rik																															AVR	0.535	0.621	0.00358245	0.000455529	1	PCEC1	0.556	0.643	0.0633615	1.12283e-05	0.333873	PCEC2	0.857	0.584	0.0798574	3.29382e-27	9.79419e-23
26	1110007C09Rik	AA	0.772	0.541	0.8331	4.87893e-20	1.45075e-15													EA	0.637	0.545	0.669122	6.1779e-11	1.837e-06	DVR	0.646	0.544	0.393249	1.16494e-06	0.0346395	AVR	0.468	0.56	-0.223186	3.18797e-05	0.947943	PCEC1	0.441	0.613	-0.288281	6.34487e-34	1.88665e-29	PCEC2	0.812	0.521	-0.0408202	1.77401e-25	5.27502e-21
27	1110008F13Rik							GE1	0.455	0.519	-0.142744	0.00652662	1													DVR	0.577	0.509	0.202042	0.00761023	1	AVR	0.458	0.52	-0.0120678	0.0095486	1	PCEC1	0.433	0.559	-0.0205265	8.09774e-14	2.40786e-09	PCEC2	0.81	0.48	0.217249	4.77071e-41	1.41857e-36
28	1110008L16Rik																																					PCEC1	0.11	0.164	-0.153436	1.93066e-07	0.00574081	PCEC2	0.248	0.133	0.0661622	9.22609e-12	2.74338e-07
29	1110008P14Rik	AA	0.544	0.398	0.524998	2.31016e-07	0.00686927	GE1	0.354	0.408	-0.29166	0.00733578	1													DVR	0.538	0.394	0.644037	4.14271e-11	1.23184e-06	AVR	0.341	0.411	-0.192154	0.00141177	1	PCEC1	0.295	0.466	-0.255658	1.0515e-30	3.12662e-26	PCEC2	0.705	0.37	0.226594	1.66267e-39	4.94396e-35
30	1110012L19Rik																															AVR	0.164	0.212	0.108792	0.00440682	1	PCEC1	0.157	0.236	0.0867201	8.14074e-11	2.42065e-06	PCEC2	0.432	0.182	-0.0239906	2.25074e-41	6.69257e-37
31	1110015O18Rik																															AVR	0.002	0	0.00345878	0.00375008	1
32	1110017D15Rik																																											PCEC2	0.034	0.012	0.67359	4.78746e-05	1
33	1110018N20Rik							GE1	0.048	0.104	-1.78448	4.83031e-05	1													DVR	0.022	0.104	-1.82451	3.42636e-07	0.0101883													PCEC2	0.213	0.086	0.313695	2.68664e-21	7.98872e-17
34	1110019D14Rik																																											PCEC2	0.054	0.026	0.0985408	0.000273797	1
35	1110020A21Rik																																					PCEC1	0.01	0.026	-0.075019	4.81563e-05	1	PCEC2	0.043	0.018	0.105681	5.91149e-05	1
36	1110032A03Rik	AA	0.335	0.239	0.178414	0.0010513	1																															PCEC1	0.182	0.277	-0.151182	2.52511e-14	7.50841e-10	PCEC2	0.452	0.219	0.283005	1.06331e-29	3.16175e-25
37	1110032F04Rik
38	1110034G24Rik																															AVR	0.12	0.188	-0.250991	2.41027e-05	0.716695	PCEC1	0.135	0.208	-0.144334	5.74443e-11	1.70811e-06	PCEC2	0.398	0.157	0.337613	2.72984e-44	8.11719e-40
39	1110035H17Rik																																					PCEC1	0.215	0.27	-0.00374559	0.000127143	1	PCEC2	0.418	0.231	0.253717	5.3842e-18	1.60099e-13
40	1110036E04Rik																															AVR	0.019	0.006	0.179882	0.000235201	1	PCEC1	0.003	0.01	-0.0599484	0.00272723	1
41	1110037F02Rik																																					PCEC1	0.203	0.288	-0.175228	5.29573e-11	1.57469e-06	PCEC2	0.412	0.239	0.0390058	1.12963e-16	3.35895e-12
42	1110038B12Rik							GE1	0.122	0.18	-0.999373	0.000453601	1	GE2	0.223	0.169	0.35286	0.00123677	1	EA	0.238	0.171	0.315424	0.000661313	1													PCEC1	0.11	0.212	-0.423645	5.28668e-21	1.572e-16	PCEC2	0.289	0.162	0.292042	7.57149e-13	2.25138e-08
43	1110038F14Rik																			EA	0.526	0.585	-0.626948	0.000152114	1							AVR	0.472	0.594	-0.174012	6.98739e-08	0.0020777	PCEC1	0.512	0.621	0.174277	5.63128e-08	0.00167446	PCEC2	0.877	0.548	-0.0409554	1.08488e-34	3.2259e-30
44	1110046J04Rik	AA	0.507	0.378	0.307236	7.62271e-05	1																															PCEC1	0.349	0.403	-0.015606	0.00572205	1
45	1110051M20Rik	AA	0.609	0.521	0.316015	0.00887018	1																									AVR	0.439	0.534	-0.17743	3.65037e-06	0.108544	PCEC1	0.471	0.555	0.137628	2.43582e-06	0.0724293	PCEC2	0.779	0.495	-0.0741023	1.12754e-26	3.35274e-22
46	1110059E24Rik							GE1	0.362	0.452	-0.290714	7.51113e-05	1																									PCEC1	0.37	0.486	0.190887	5.7907e-12	1.72187e-07	PCEC2	0.749	0.409	-0.176274	9.33071e-48	2.77449e-43
47	1110059G10Rik	AA	0.465	0.354	-0.0296263	0.00453192	1	GE1	0.424	0.352	0.697141	1.95607e-06	0.0581636	GE2	0.404	0.354	0.264385	0.00484105	1													AVR	0.262	0.37	-0.413046	1.0687e-07	0.00317777	PCEC1	0.275	0.407	-0.310055	3.21115e-21	9.54836e-17	PCEC2	0.595	0.332	0.3022	6.17638e-29	1.83655e-24
48	1110065P20Rik																									DVR	0.259	0.191	0.406574	0.00126221	1							PCEC1	0.142	0.225	-0.128719	1.71195e-12	5.09049e-08	PCEC2	0.344	0.178	0.173567	5.64808e-17	1.67946e-12
49	1190002F15Rik																																					PCEC1	0.108	0.153	-0.240588	1.03829e-05	0.308736	PCEC2	0.206	0.129	0.077957	3.70487e-07	0.0110164
50	1190002N15Rik																																					PCEC1	0.033	0.069	-0.296719	3.8127e-08	0.00113371	PCEC2	0.112	0.049	0.256166	1.71483e-09	5.09906e-05
51	1190007I07Rik																									DVR	0.175	0.103	0.502799	1.74355e-05	0.518443							PCEC1	0.085	0.122	-0.108382	5.43094e-05	1	PCEC2	0.159	0.102	-0.137138	0.000225554	1
52	1200007C13Rik																									DVR	0.006	0.001	0.00500716	0.00815404	1
53	1200014J11Rik							GE1	0.294	0.369	-0.00051497	0.00117522	1																									PCEC1	0.286	0.406	-0.09018	1.24878e-15	3.71324e-11	PCEC2	0.593	0.336	0.126431	7.40683e-35	2.20242e-30
54	1300002E11Rik																															AVR	0.174	0.243	-0.0524425	0.000453049	1	PCEC1	0.178	0.269	-0.175687	4.85517e-13	1.44368e-08	PCEC2	0.407	0.217	0.0706117	2.13914e-20	6.36073e-16
55	1300017J02Rik																																											PCEC2	0.022	0.005	0.112885	6.68813e-06	0.198871
56	1500002C15Rik																									DVR	0.582	0.508	0.270949	0.000389343	1	AVR	0.444	0.521	-0.142808	0.00055965	1	PCEC1	0.43	0.56	-0.0211033	2.34499e-11	6.97282e-07	PCEC2	0.749	0.486	0.0516214	1.97867e-18	5.88356e-14
57	1500002F19Rik																									DVR	0.036	0.011	0.109544	4.67254e-05	1
58	1500004A13Rik	AA	0.288	0.177	1.41293	2.92819e-06	0.0870697																															PCEC1	0.149	0.2	-0.366006	3.36317e-06	0.100004	PCEC2	0.259	0.173	-0.218397	1.84481e-06	0.0548555
59	1500009L16Rik	AA	0.019	0.003	-0.0101304	0.000571734	1
60	1500011B03Rik																															AVR	0.131	0.2	0.0574944	0.000148638	1	PCEC1	0.154	0.215	-0.0586585	1.06697e-07	0.00317264	PCEC2	0.327	0.178	-0.108602	3.27225e-16	9.73003e-12
61	1500011K16Rik	AA	0.488	0.342	0.22191	1.54424e-05	0.45918																									AVR	0.244	0.36	-0.246223	1.78182e-07	0.00529824	PCEC1	0.291	0.381	0.00842858	1.75258e-08	0.00052113	PCEC2	0.508	0.33	0.137076	7.69003e-12	2.28663e-07
62	1500012F01Rik							GE1	0.406	0.498	-1.27437	6.60603e-09	0.00019643	GE2	0.582	0.48	0.46547	3.15341e-10	9.37666e-06													AVR	0.515	0.487	0.570655	0.000998697	1	PCEC1	0.367	0.56	-0.434404	5.49092e-40	1.63272e-35	PCEC2	0.752	0.46	0.317146	1.29042e-33	3.83706e-29
63	1500015A07Rik	AA	0.358	0.465	-0.707311	5.08184e-05	1							GE2	0.566	0.449	0.34004	2.27019e-07	0.00675041							DVR	0.579	0.452	0.200044	2.08401e-06	0.0619681							PCEC1	0.377	0.509	-0.110769	1.00411e-13	2.98572e-09	PCEC2	0.562	0.449	-0.120241	0.0068371	1
64	1500017E21Rik							GE1	0.099	0.067	0.994215	0.00525299	1	GE2	0.11	0.066	0.632824	9.28416e-05	1													AVR	0.04	0.074	-0.550319	0.00209002	1	PCEC1	0.045	0.085	-0.589044	2.45663e-08	0.000730479	PCEC2	0.118	0.065	0.0561393	5.91434e-06	0.175863
65	1500026H17Rik
66	1520401A03Rik	AA	0.005	0	0.00214035	0.000808947	1
67	1600002D24Rik																																											PCEC2	0.029	0.009	0.204197	3.83264e-05	1
68	1600002H07Rik																																					PCEC1	0.098	0.125	0.0109913	0.00336283	1	PCEC2	0.148	0.111	-0.344281	0.00977026	1
69	1600002K03Rik																																					PCEC1	0.071	0.123	-0.0799349	6.45931e-09	0.000192068	PCEC2	0.241	0.089	0.355112	3.72509e-27	1.10765e-22
70	1600010M07Rik																															AVR	0.059	0.037	0.0792133	0.00855215	1
71	1600012H06Rik																																					PCEC1	0.383	0.51	0.138079	1.24682e-15	3.70742e-11	PCEC2	0.769	0.429	0.00036997	2.14328e-46	6.37306e-42
72	1600014C10Rik							GE1	0.236	0.316	-0.67596	0.000118876	1							EA	0.241	0.314	-0.479446	0.00297648	1							AVR	0.234	0.318	0.172995	0.000358437	1							PCEC2	0.53	0.284	-0.150635	2.17422e-29	6.46503e-25
73	1600017P15Rik																																					PCEC1	0.001	0.006	-0.242572	0.00246388	1	PCEC2	0.011	0.003	0.0947939	0.00501587	1
74	1600019K03Rik																															AVR	0.002	0	0.110424	0.00375008	1
75	1600020E01Rik																															AVR	0.239	0.317	-0.0483706	0.000351401	1	PCEC1	0.237	0.35	-0.163506	2.24708e-16	6.68168e-12	PCEC2	0.555	0.281	0.129243	1.6967e-36	5.04515e-32
76	1600029O15Rik																																					PCEC1	0.048	0.069	-0.254855	0.0018511	1	PCEC2	0.098	0.057	-0.0449042	0.000116838	1
77	1700001C19Rik
78	1700001D01Rik
79	1700001G01Rik
80	1700001G11Rik													GE2	0.235	0.188	0.114924	0.00816053	1																			PCEC1	0.164	0.209	0.0240032	0.000378354	1
81	1700001K19Rik																																											PCEC2	0.014	0.004	0.192766	0.000468648	1
82	1700001L19Rik																																											PCEC2	0.013	0.001	0.200396	1.66991e-07	0.00496549
83	1700001O22Rik																									DVR	0.042	0.014	1.12215	6.95026e-05	1	AVR	0.003	0.018	-0.551232	0.00979097	1	PCEC1	0.007	0.022	-0.206578	1.50939e-05	0.448818	PCEC2	0.042	0.013	-0.477727	8.17827e-07	0.0243181
84	1700001P01Rik													GE2	0.018	0.003	0.52928	1.70766e-06	0.0507772																			PCEC1	0.002	0.007	-0.159229	0.00796055	1
85	1700003C15Rik																																											PCEC2	0.004	0	0.0187451	0.00815688	1
86	1700003D09Rik
87	1700003E16Rik																																											PCEC2	0.013	0.002	-0.105868	5.19248e-05	1
88	1700003M02Rik																																											PCEC2	0.016	0.004	0.234771	0.000107399	1
89	1700003N22Rik																																											PCEC2	0.005	0	0.00915025	1.6815e-05	0.499994
90	1700006J14Rik
91	1700007E05Rik
92	1700007F19Rik																															AVR	0.01	0.002	0.100922	0.000946233	1
93	1700007G11Rik																																					PCEC1	0.001	0.008	-0.143778	0.000670042	1	PCEC2	0.022	0.004	-0.0601411	5.5574e-08	0.00165249
94	1700007J10Rik													GE2	0.345	0.268	0.0767143	0.000350694	1	EA	0.343	0.272	0.234118	0.00387816	1													PCEC1	0.205	0.317	-0.129786	6.87237e-16	2.0435e-11	PCEC2	0.373	0.265	0.168007	1.53424e-06	0.0456205
95	1700007L15Rik																																					PCEC1	0.014	0.032	-0.256708	2.91095e-05	0.86557	PCEC2	0.054	0.022	0.242461	4.73279e-06	0.14073
96	1700007P06Rik																																											PCEC2	0.02	0.007	0.0655119	0.00140457	1
97	1700008J07Rik																																					PCEC1	0.086	0.129	0.0340568	2.74835e-06	0.0817223	PCEC2	0.163	0.108	-0.108718	0.000222784	1
98	1700008O03Rik							GE1	0.033	0.007	0.524714	1.14413e-08	0.000340208
99	1700010I02Rik
100	1700010K24Rik																																											PCEC2	0.031	0.01	0.23446	3.24788e-05	0.965756
101	1700010L04Rik
102	1700011A15Rik
103	1700011L22Rik	AA	0.005	0	0.219394	0.00881994	1
104	1700013F07Rik													GE2	0.009	0.002	0.202636	0.00525806	1
105	1700015O11Rik																															AVR	0.005	0	0.00695185	0.000343059	1
106	1700016D06Rik																																					PCEC1	0.014	0.031	-0.0471407	9.66726e-05	1	PCEC2	0.047	0.022	0.0989377	0.000422358	1
107	1700016G22Rik													GE2	0.009	0.002	0.38533	0.00300915	1																									PCEC2	0.009	0.002	0.419954	0.00280894	1
108	1700016K19Rik
109	1700016P03Rik																																					PCEC1	0.042	0.074	0.0408953	2.6859e-06	0.0798653	PCEC2	0.139	0.054	0.279053	7.52879e-15	2.23869e-10
110	1700017B05Rik																																					PCEC1	0.092	0.127	-0.122121	0.000136984	1	PCEC2	0.192	0.105	-0.320643	4.74479e-09	0.000141086
111	1700017N19Rik																																											PCEC2	0.004	0	-0.00220196	0.00116686	1
112	1700018L02Rik																			EA	0.366	0.248	0.34571	1.61461e-07	0.00480104	DVR	0.368	0.247	0.860157	2.2136e-09	6.58215e-05	AVR	0.2	0.262	-0.178785	0.00260139	1	PCEC1	0.191	0.292	-0.173444	5.01063e-14	1.48991e-09	PCEC2	0.394	0.239	0.0466801	4.7522e-11	1.41307e-06
113	1700019B03Rik
114	1700019G17Rik																									DVR	0.047	0.009	1.6516	3.6381e-11	1.08179e-06
115	1700019G24Rik																															AVR	0.003	0	0.084434	4.13458e-05	1
116	1700019L03Rik													GE2	0.016	0.005	0.114112	0.000789792	1																			PCEC1	0.002	0.008	-0.13109	0.0047005	1
117	1700020D05Rik													GE2	0.007	0.001	-0.00377147	0.000198687	1
118	1700020G17Rik
119	1700020I14Rik	AA	0.684	0.543	0.33666	6.23334e-06	0.185348													EA	0.483	0.553	-0.359483	0.0053598	1													PCEC1	0.457	0.601	-0.138331	3.93176e-20	1.16911e-15	PCEC2	0.834	0.517	0.11685	8.3348e-33	2.47835e-28
120	1700021A07Rik
121	1700021F05Rik																															AVR	0.133	0.182	-0.111404	0.00445235	1	PCEC1	0.118	0.211	-0.361276	1.97242e-17	5.865e-13	PCEC2	0.438	0.147	0.65574	2.19224e-60	6.51864e-56
122	1700021J08Rik																									DVR	0.136	0.086	0.371764	0.000752094	1
123	1700021K19Rik							GE1	0.356	0.439	-0.645255	0.000171278	1																									PCEC1	0.324	0.493	-0.000114753	3.93145e-30	1.16902e-25	PCEC2	0.758	0.395	0.0824032	4.34662e-64	1.29247e-59
124	1700021N21Rik																									DVR	0.006	0.001	0.340093	0.00254037	1
125	1700022E09Rik							GE1	0.002	0	0.0273437	0.0013242	1
126	1700022N22Rik
127	1700023H06Rik
128	1700024J04Rik
129	1700025B11Rik																															AVR	0.022	0.005	0.36565	1.18616e-06	0.0352704
130	1700025G04Rik	AA	0.195	0.282	-2.64948	0.000441136	1																															PCEC1	0.207	0.32	-0.192748	2.6541e-18	7.89197e-14	PCEC2	0.528	0.251	0.445759	6.03302e-42	1.79392e-37
131	1700026D08Rik
132	1700026L06Rik	AA	0.009	0.001	0.486027	3.31518e-05	0.985768
133	1700027A07Rik							GE1	0.066	0.019	0.232436	2.45422e-11	7.29763e-07	GE2	0.09	0.015	0.322834	9.2791e-29	2.75914e-24							DVR	0.003	0.024	-0.151193	0.00838502	1	AVR	0.007	0.025	-0.138787	0.0062248	1	PCEC1	0.007	0.032	-0.167128	8.58731e-10	2.55344e-05
134	1700027F09Rik																																											PCEC2	0.027	0.005	0.286367	3.57355e-08	0.0010626
135	1700027J19Rik	AA	0.274	0.179	0.699275	0.000233814	1	GE1	0.222	0.179	0.547017	0.00617222	1																			AVR	0.105	0.192	-0.63605	1.68908e-07	0.00502248	PCEC1	0.141	0.207	-0.25767	1.3661e-09	4.0621e-05	PCEC2	0.34	0.165	-0.375594	1.04324e-20	3.10208e-16
136	1700028D13Rik
137	1700028E10Rik																																					PCEC1	0.016	0.037	-0.377175	9.44145e-06	0.280742
138	1700028J19Rik																															AVR	0.01	0.033	-0.16019	0.0029622	1							PCEC2	0.061	0.027	0.179418	7.0732e-06	0.210322
139	1700028K03Rik													GE2	0.39	0.28	0.243473	6.28569e-08	0.00186905																			PCEC1	0.222	0.331	-0.254112	4.046e-17	1.20308e-12	PCEC2	0.351	0.285	0.205017	0.00233739	1
140	1700028K03Rik.1													GE2	0.077	0.047	0.329606	0.0017561	1																			PCEC1	0.039	0.057	-0.145401	0.00369044	1
141	1700028N14Rik																															AVR	0.017	0.007	0.200605	0.00687535	1
142	1700029F12Rik
143	1700029H14Rik																																											PCEC2	0.005	0	0.0932756	2.44092e-07	0.00725807
144	1700029I15Rik																															AVR	0.005	0.022	-0.353601	0.00593575	1	PCEC1	0.012	0.026	-0.095119	0.000418397	1	PCEC2	0.047	0.018	0.0660999	3.83161e-06	0.113933
145	1700029J07Rik																																					PCEC1	0.018	0.044	-0.0479197	6.55891e-07	0.0195029	PCEC2	0.092	0.028	0.354843	4.58658e-15	1.36382e-10
146	1700030C10Rik
147	1700030C12Rik																									DVR	0.17	0.11	0.342364	0.000562824	1							PCEC1	0.077	0.136	-0.244578	2.11075e-10	6.27632e-06	PCEC2	0.212	0.103	0.389809	8.19042e-13	2.43542e-08
148	1700030K09Rik																																					PCEC1	0.273	0.357	0.00546976	1.87122e-08	0.000556408	PCEC2	0.477	0.309	-0.113022	4.51621e-10	1.34289e-05
149	1700030N03Rik
150	1700031A10Rik																																											PCEC2	0.052	0.011	0.267474	2.76228e-14	8.21365e-10
151	1700031P21Rik																																											PCEC2	0.014	0.002	0.261095	1.33469e-06	0.039687
152	1700034E13Rik
153	1700034H15Rik							GE1	0.05	0.087	-0.137206	0.00626582	1													DVR	0.125	0.081	0.224763	0.00472138	1							PCEC1	0.06	0.097	0.0757681	3.21881e-06	0.0957112	PCEC2	0.132	0.078	0.157687	1.22154e-05	0.363224
154	1700034P13Rik																																					PCEC1	0.07	0.106	-0.00110603	1.92363e-05	0.571992	PCEC2	0.174	0.083	0.270292	1.65485e-11	4.9207e-07
155	1700037C18Rik																															AVR	0.396	0.477	-0.103234	0.00107795	1	PCEC1	0.398	0.509	-0.0313674	1.14709e-10	3.41086e-06	PCEC2	0.669	0.446	-0.0779635	2.0014e-14	5.95116e-10
156	1700037H04Rik																															AVR	0.238	0.298	0.0219365	0.00593816	1	PCEC1	0.218	0.335	-0.259724	4.11764e-18	1.22438e-13	PCEC2	0.573	0.26	0.616094	9.27784e-48	2.75877e-43
157	1700039E22Rik							GE1	0.002	0	0.00471015	0.0013242	1
158	1700039M10Rik
159	1700040L02Rik																																											PCEC2	0.016	0.004	0.279642	0.000107703	1
160	1700041G16Rik
161	1700042G07Rik																																					PCEC1	0	0.004	-0.0143982	0.00619708	1	PCEC2	0.016	0.001	0.0485297	1.52048e-12	4.52114e-08
162	1700045I11Rik
163	1700047A11Rik							GE1	0.203	0.146	0.349166	0.00049037	1
164	1700047I17Rik2							GE1	0.234	0.174	0.292287	0.000359798	1	GE2	0.244	0.172	0.0989246	5.15608e-05	1																			PCEC1	0.143	0.2	-0.0886251	1.37914e-06	0.0410086
165	1700047K16Rik	AA	0.047	0.018	0.13051	0.00254063	1
166	1700047N06Rik
167	1700049G17Rik																																					PCEC1	0.046	0.065	-0.029078	0.00446018	1	PCEC2	0.09	0.055	0.223472	0.000737267	1
168	1700049J03Rik
169	1700051O22Rik																																					PCEC1	0.136	0.189	0.0498942	5.35732e-06	0.1593	PCEC2	0.241	0.162	0.057587	4.23952e-05	1
170	1700052K11Rik																																					PCEC1	0.068	0.124	-0.287797	9.35102e-11	2.78053e-06	PCEC2	0.253	0.087	0.600846	4.26968e-34	1.26959e-29
171	1700054O19Rik
172	1700055D18Rik	AA	0.121	0.069	-0.0350344	0.00457896	1																															PCEC1	0.055	0.081	0.234944	0.000437842	1	PCEC2	0.108	0.067	-0.451775	0.000581424	1
173	1700056E22Rik
174	1700056N10Rik																																					PCEC1	0.005	0.018	-0.566271	4.61584e-05	1	PCEC2	0.038	0.011	0.506558	1.04737e-07	0.00311435
175	1700057G04Rik																																					PCEC1	0.009	0.018	-0.20309	0.00824795	1
176	1700058P15Rik
177	1700060J05Rik																									DVR	0.145	0.089	0.190995	0.000564191	1							PCEC1	0.075	0.103	-0.0735755	0.00100568	1
178	1700061E17Rik	AA	0.219	0.419	-2.05179	7.76555e-12	2.30909e-07													EA	0.343	0.416	-0.286265	0.00557318	1	DVR	0.32	0.417	-0.649292	8.22605e-06	0.244602													PCEC2	0.673	0.382	0.297477	4.73865e-30	1.40904e-25
179	1700061G19Rik																																											PCEC2	0.009	0.002	0.0790926	0.000700061	1
180	1700061H18Rik	AA	0.06	0.025	0.275723	0.00125335	1							GE2	0.043	0.024	0.336537	0.00685908	1	EA	0.148	0.018	1.69055	1.22301e-49	3.63661e-45							AVR	0.005	0.028	-0.540191	0.000827944	1	PCEC1	0.008	0.037	-0.709668	6.60046e-11	1.96265e-06
181	1700063K16Rik
182	1700065D16Rik																																											PCEC2	0.033	0.015	-0.102816	0.00273436	1
183	1700066B19Rik	AA	0.874	0.664	0.550802	6.951e-20	2.06688e-15																			DVR	0.747	0.667	0.121604	0.00436181	1							PCEC1	0.584	0.722	-0.109881	1.58949e-12	4.72636e-08
184	1700067K01Rik
185	1700069L16Rik	AA	0.019	0.001	0.535264	2.99256e-08	0.000889838
186	1700071K01Rik																			EA	0.009	0.001	0.0107423	0.00201335	1
187	1700071M16Rik							GE1	0.031	0.011	0.621919	9.48659e-05	1	GE2	0.027	0.011	0.391155	0.00106062	1																			PCEC1	0.004	0.018	-0.289158	5.88709e-06	0.175052
188	1700072G22Rik													GE2	0.011	0.002	0.317549	0.0011456	1																			PCEC1	0.001	0.005	-0.132726	0.00630695	1
189	1700073E17Rik
190	1700074H08Rik																																											PCEC2	0.002	0	0.0301108	0.0028878	1
191	1700082M22Rik																																					PCEC1	0.052	0.082	-0.0377661	4.55504e-05	1
192	1700084C06Rik
193	1700084E18Rik																																											PCEC2	0.096	0.064	0.265819	0.00409054	1
194	1700086D15Rik	AA	0.005	0	0.222901	0.00879187	1							GE2	0.004	0	-0.00619712	0.00122795	1
195	1700086L19Rik																									DVR	0.003	0	0.00587608	0.00016311	1
196	1700086O06Rik																									DVR	0.201	0.291	-0.491066	0.000122769	1													PCEC2	0.401	0.272	0.234461	2.88636e-07	0.0085826
197	1700086P04Rik																									DVR	0.017	0.005	0.14969	0.00291678	1													PCEC2	0.016	0.004	0.0172651	0.00029643	1
198	1700088E04Rik																			EA	0.189	0.275	-0.425006	0.000412924	1	DVR	0.209	0.274	-0.875247	0.00151348	1							PCEC1	0.224	0.295	0.107727	8.532e-07	0.0253699	PCEC2	0.519	0.241	0.383952	3.05837e-42	9.09407e-38
199	1700093J21Rik	AA	0.005	0	0.0104147	7.80799e-07	0.0232171
200	1700093K21Rik
201	1700094J05Rik	AA	0.065	0.032	0.311009	0.00706947	1
202	1700095B10Rik	AA	0.005	0	0.00516764	7.80799e-07	0.0232171
203	1700095J07Rik							GE1	0.039	0.072	-0.103805	0.00523521	1	GE2	0.101	0.066	0.0420663	0.00304884	1																			PCEC1	0.051	0.08	-0.0545076	3.798e-05	1	PCEC2	0.105	0.066	0.103606	0.000469392	1
204	1700096J18Rik
205	1700096K18Rik																																					PCEC1	0.102	0.157	-0.177159	3.4874e-08	0.00103698	PCEC2	0.28	0.121	0.125827	1.69259e-23	5.03291e-19
206	1700097N02Rik																									DVR	0.047	0.01	1.10303	1.33395e-09	3.9665e-05							PCEC1	0.004	0.018	-0.470017	3.47087e-06	0.103206	PCEC2	0.045	0.009	0.441701	1.00971e-12	3.00236e-08
207	1700099I09Rik	AA	0.037	0.013	0.164223	0.00291125	1																			DVR	0.045	0.012	0.267474	2.7786e-07	0.00826217							PCEC1	0.006	0.019	-0.12738	5.96994e-05	1
208	1700101I11Rik							GE1	0.553	0.589	-0.214478	0.00876762	1	GE2	0.519	0.594	-0.441134	1.17599e-07	0.00349681	EA	0.52	0.59	-0.279874	0.00350507	1	DVR	0.66	0.581	0.126378	0.00176692	1													PCEC2	0.767	0.566	-0.11087	2.77864e-05	0.826228
209	1700102P08Rik																									DVR	0.025	0.009	0.0190451	0.00271757	1
210	1700104B16Rik
211	1700105P06Rik
212	1700108F19Rik																																											PCEC2	0.058	0.031	0.168948	0.00090034	1
213	1700108N11Rik																															AVR	0.002	0	0.00303139	0.00375008	1
214	1700109G14Rik																																					PCEC1	0.016	0.034	-0.120051	0.00012344	1	PCEC2	0.045	0.025	0.371756	0.00668712	1
215	1700109H08Rik																									DVR	0.095	0.055	-0.0408264	0.00225826	1							PCEC1	0.04	0.068	-0.420392	1.17354e-05	0.348952
216	1700110I01Rik													GE2	0.111	0.064	0.0106173	6.53751e-05	1																			PCEC1	0.049	0.081	-0.0458231	6.83672e-06	0.20329
217	1700111N16Rik							GE1	0.002	0	0.0122213	0.0013242	1
218	1700112E06Rik																																											PCEC2	0.096	0.054	0.0713445	6.91097e-05	1
219	1700112J16Rik	AA	0.074	0.036	0.0845214	0.00343585	1																															PCEC1	0.029	0.042	0.018791	0.00937966	1
220	1700113A16Rik													GE2	0.192	0.144	0.208755	0.00172692	1																			PCEC1	0.105	0.174	-0.244359	1.8211e-11	5.41505e-07	PCEC2	0.268	0.136	0.130871	2.63728e-14	7.84194e-10
221	1700116B05Rik																									DVR	0.003	0	0.0677446	0.00016311	1
222	1700120B22Rik													GE2	0.142	0.081	0.287426	1.71382e-06	0.0509603																			PCEC1	0.06	0.103	-0.150523	6.55895e-08	0.0019503
223	1700120C14Rik																																					PCEC1	0.303	0.359	0.100721	0.00298115	1	PCEC2	0.427	0.329	0.00812322	0.000175468	1
224	1700120G07Rik																																											PCEC2	0.004	0	0.0832985	0.00817153	1
225	1700120K04Rik
226	1700121L16Rik																									DVR	0.025	0.005	0.0637175	7.42146e-07	0.0220677
227	1700123I01Rik							GE1	0.006	0.029	-0.671191	0.00350082	1																															PCEC2	0.067	0.022	0.171098	5.39498e-10	1.6042e-05
228	1700123M08Rik																																											PCEC2	0.049	0.013	0.108232	8.40627e-10	2.49961e-05
229	1700123O20Rik													GE2	0.481	0.426	0.318797	0.00364794	1																			PCEC1	0.347	0.481	-0.125662	1.28592e-19	3.82368e-15	PCEC2	0.676	0.404	-0.0133692	3.12767e-24	9.30014e-20
230	1700125H03Rik													GE2	0.013	0.004	-0.0626509	0.00491374	1
231	1700128F08Rik													GE2	0.072	0.04	0.0744042	0.000575745	1																			PCEC1	0.028	0.052	-0.110786	2.69757e-05	0.802122
232	1810006J02Rik																			EA	0.093	0.05	0.927695	0.00058401	1	DVR	0.139	0.047	1.15145	7.71666e-15	2.29455e-10	AVR	0.021	0.057	-0.654569	0.000251736	1	PCEC1	0.021	0.071	-0.693762	8.74138e-16	2.59925e-11	PCEC2	0.107	0.047	-0.0469249	5.79453e-09	0.0001723
233	1810008B01Rik																			EA	0.105	0.055	0.60521	9.61599e-05	1							AVR	0.028	0.062	-0.32471	0.000970146	1	PCEC1	0.044	0.066	-0.0381004	0.000762175	1
234	1810008I18Rik
235	1810009A15Rik																															AVR	0.336	0.406	-0.148189	0.00185902	1	PCEC1	0.33	0.438	-0.000760269	4.34535e-11	1.29209e-06	PCEC2	0.637	0.371	0.1206	3.59598e-25	1.06927e-20
236	1810010H24Rik																			EA	0.02	0.007	-0.250805	0.00836639	1
237	1810011H11Rik																																											PCEC2	0.004	0	0.00415077	0.00820089	1
238	1810011O10Rik	AA	0.991	0.994	-2.65268	2.30543e-81	6.85519e-77							GE2	0.989	0.995	-0.350371	3.77948e-14	1.12383e-09							DVR	0.975	0.996	-1.81897	2.67551e-113	7.95563e-109							PCEC1	0.997	0.993	0.478335	6.10584e-98	1.81557e-93	PCEC2	1	0.994	0.18415	3.92837e-12	1.1681e-07
239	1810012K08Rik	AA	0.126	0.071	0.350658	0.0027075	1							GE2	0.106	0.069	0.382655	0.00148392	1													AVR	0.045	0.076	-0.41165	0.00571757	1	PCEC1	0.051	0.086	-0.170978	4.02392e-06	0.119651
240	1810012K16Rik							GE1	0.017	0.006	0.214825	0.00462959	1
241	1810013D15Rik							GE1	0.056	0.095	-0.2307	0.00376308	1																			AVR	0.133	0.087	0.259018	0.000268309	1	PCEC1	0.075	0.101	-0.0744494	0.00139975	1	PCEC2	0.143	0.086	0.213632	1.38137e-05	0.41075
242	1810013L24Rik							GE1	0.108	0.162	-0.49895	0.00178372	1																									PCEC1	0.116	0.18	-0.142333	6.6675e-10	1.98258e-05	PCEC2	0.293	0.142	0.203794	9.64805e-19	2.86885e-14
243	1810014B01Rik							GE1	0.735	0.641	0.302906	1.63363e-08	0.000485761	GE2	0.697	0.644	0.20673	5.18322e-05	1	EA	0.608	0.652	-0.260969	0.0032897	1													PCEC1	0.564	0.698	-0.0167559	6.60538e-11	1.96411e-06
244	1810019D21Rik																									DVR	0.036	0.011	1.15774	3.81019e-05	1
245	1810019N24Rik													GE2	0.016	0.006	0.459036	0.00434181	1
246	1810020O05Rik																																											PCEC2	0.004	0	-0.0141954	0.00116686	1
247	1810021B22Rik																																											PCEC2	0.069	0.034	-0.414165	5.28866e-05	1
248	1810022K09Rik																															AVR	0.334	0.411	-0.191274	0.000901271	1	PCEC1	0.33	0.445	0.0422556	2.87683e-11	8.55426e-07	PCEC2	0.606	0.38	0.193023	6.39688e-18	1.90211e-13
249	1810024B03Rik
250	1810026B05Rik							GE1	0.298	0.361	-0.204515	0.00770838	1																									PCEC1	0.296	0.39	-0.00618152	1.3807e-09	4.10552e-05	PCEC2	0.577	0.331	0.136784	1.07068e-23	3.18366e-19
251	1810026B05Rik.1																															AVR	0.177	0.231	-0.124418	0.00564197	1	PCEC1	0.167	0.259	-0.201281	2.476e-13	7.36239e-09	PCEC2	0.441	0.201	0.332342	8.47846e-34	2.52107e-29
252	1810026J23Rik																																					PCEC1	0.374	0.492	0.0906743	8.0247e-13	2.38615e-08	PCEC2	0.696	0.421	-0.0673381	3.63582e-29	1.08111e-24
253	1810030O07Rik																															AVR	0.344	0.417	-0.199813	0.000344455	1	PCEC1	0.331	0.455	-0.0216776	2.12065e-15	6.30574e-11	PCEC2	0.664	0.381	-0.0425672	6.77183e-33	2.0136e-28
254	1810032O08Rik							GE1	0.077	0.117	-0.391085	0.00690752	1																									PCEC1	0.078	0.134	-0.185495	5.88924e-10	1.75116e-05	PCEC2	0.23	0.1	0.292669	1.0749e-18	3.19621e-14
255	1810034E14Rik																									DVR	0.047	0.024	0.155089	0.00788336	1							PCEC1	0.016	0.032	-0.502479	0.000293273	1	PCEC2	0.051	0.023	0.113977	0.000105957	1
256	1810037I17Rik	AA	0.819	0.708	0.149657	0.000386959	1																															PCEC1	0.647	0.75	-0.0413245	6.22597e-08	0.00185129	PCEC2	0.893	0.692	0.0162003	2.72021e-08	0.000808854
257	1810043G02Rik																																					PCEC1	0.176	0.223	0.123737	0.000290952	1	PCEC2	0.32	0.193	-0.0471584	6.48498e-12	1.92831e-07
258	1810043H04Rik																															AVR	0.231	0.303	-0.369067	0.000165482	1	PCEC1	0.247	0.323	0.0508707	1.89966e-07	0.00564864	PCEC2	0.492	0.273	0.0594618	1.29884e-20	3.86209e-16
259	1810044D09Rik																																											PCEC2	0.038	0.02	-0.0445707	0.00602561	1
260	1810049J17Rik																																					PCEC1	0.138	0.199	-0.179337	4.66197e-08	0.00138624	PCEC2	0.28	0.165	0.369089	3.39737e-10	1.01021e-05
261	1810055G02Rik																																					PCEC1	0.049	0.109	-0.867097	4.76576e-14	1.4171e-09	PCEC2	0.192	0.075	0.362847	2.49456e-20	7.41759e-16
262	1810058I24Rik							GE1	0.571	0.504	0.378145	0.000158778	1							EA	0.599	0.504	0.261476	6.96371e-05	1							AVR	0.427	0.52	-0.301991	1.79454e-06	0.0533608	PCEC1	0.416	0.564	-0.161515	8.01156e-23	2.38224e-18	PCEC2	0.79	0.479	0.220172	2.18523e-33	6.49778e-29
263	1810059C17Rik
264	1810062G17Rik																																											PCEC2	0.022	0.009	-0.0307868	0.00484275	1
265	1810062O18Rik																									DVR	0.175	0.054	1.12996	2.92385e-21	8.69407e-17	AVR	0.036	0.065	-0.181606	0.00691074	1	PCEC1	0.044	0.073	-0.108399	2.12795e-05	0.632745
266	1810064F22Rik																																					PCEC1	0.023	0.044	-0.0388535	5.76116e-05	1	PCEC2	0.058	0.034	0.122971	0.00274618	1
267	2010001A14Rik																																					PCEC1	0.027	0.047	-0.131971	0.000249022	1	PCEC2	0.074	0.035	0.0497324	1.09816e-05	0.326539
268	2010001K21Rik																																					PCEC1	0.006	0.001	0.00776865	0.00348379	1
269	2010005H15Rik																																					PCEC1	0.016	0.006	0.0603822	0.000457348	1
270	2010007H06Rik							GE1	0.039	0.094	-1.67165	3.38335e-05	1							EA	0.134	0.087	0.902917	0.00139916	1													PCEC1	0.053	0.11	-0.0581511	3.14487e-12	9.35126e-08	PCEC2	0.25	0.071	0.539618	5.09324e-43	1.51447e-38
271	2010009K17Rik																									DVR	0.025	0.009	0.186582	0.00212662	1
272	2010010A06Rik	AA	0.005	0	-0.000544881	0.00884809	1
273	2010012O05Rik																															AVR	0.351	0.424	-0.0611659	0.000272857	1	PCEC1	0.322	0.47	-0.289546	1.22052e-23	3.6292e-19	PCEC2	0.638	0.391	0.645561	1.34749e-32	4.00677e-28
274	2010015M23Rik							GE1	0.528	0.614	-0.253725	0.000316337	1	GE2	0.479	0.621	-0.26201	2.56202e-09	7.61817e-05							DVR	0.691	0.601	0.258261	0.000283815	1	AVR	0.695	0.596	0.134623	3.78624e-09	0.000112584	PCEC1	0.706	0.55	0.375524	4.24118e-37	1.26111e-32	PCEC2	0.338	0.637	-0.792912	8.77632e-54	2.60964e-49
275	2010016I18Rik	AA	0.042	0.007	0.520161	3.78785e-08	0.00112632
276	2010106C02Rik
277	2010107E04Rik																																					PCEC1	0.504	0.592	0.0218181	8.99636e-06	0.267507	PCEC2	0.736	0.54	0.26595	4.51305e-14	1.34196e-09
278	2010109A12Rik													GE2	0.022	0.009	0.487559	0.00425022	1
279	2010109I03Rik																																					PCEC1	0.08	0.116	-0.180848	3.27096e-05	0.972621	PCEC2	0.179	0.094	0.4386	1.77455e-10	5.27662e-06
280	2010111I01Rik	AA	0.953	0.933	-0.682886	2.99543e-10	8.9069e-06	GE1	0.961	0.931	0.255448	9.71995e-12	2.89023e-07	GE2	0.953	0.931	0.207601	1.55543e-08	0.000462507	EA	0.939	0.933	0.386313	3.91675e-11	1.16464e-06	DVR	0.916	0.935	-0.447551	5.32147e-11	1.58234e-06	AVR	0.888	0.939	-0.205427	1.69483e-07	0.00503957							PCEC2	0.987	0.927	-0.0157481	0.00799032	1
281	2010204K13Rik																															AVR	0.007	0.001	0.221674	0.00257104	1
282	2010300F17Rik																															AVR	0.003	0	0.00183153	0.00164432	1
283	2010315B03Rik																															AVR	0.188	0.245	0.0607571	0.00122917	1	PCEC1	0.198	0.263	-0.212667	2.5654e-06	0.0762822	PCEC2	0.333	0.229	0.182526	5.55853e-08	0.00165283
284	2010320M18Rik																															AVR	0.053	0.096	0.0940563	0.000936558	1	PCEC1	0.063	0.108	-0.361087	4.18924e-08	0.00124567	PCEC2	0.175	0.082	0.225873	3.22222e-12	9.58128e-08
285	2010320O07Rik
286	2200002D01Rik	AA	0.609	0.5	0.223853	0.00189654	1																									AVR	0.423	0.514	-0.264527	6.26593e-05	1	PCEC1	0.432	0.546	-0.0604803	1.24155e-10	3.69174e-06	PCEC2	0.732	0.478	0.137092	1.86204e-17	5.53677e-13
287	2210010C04Rik																																											PCEC2	0.013	0.003	0.0181997	0.000219946	1
288	2210011C24Rik
289	2210013O21Rik																															AVR	0.539	0.628	-0.118585	0.000248247	1	PCEC1	0.547	0.66	0.0663869	8.61801e-09	0.000256257	PCEC2	0.868	0.591	0.101938	9.78269e-25	2.90888e-20
290	2210015D19Rik																																					PCEC1	0.138	0.216	-0.266827	6.66038e-12	1.98046e-07	PCEC2	0.347	0.169	0.0994456	2.0606e-22	6.12719e-18
291	2210016F16Rik																															AVR	0.282	0.351	0.0804037	0.00149084	1	PCEC1	0.26	0.391	-0.176085	7.34616e-21	2.18438e-16	PCEC2	0.647	0.309	-0.0799582	2.63995e-51	7.84989e-47
292	2210016L21Rik																															AVR	0.384	0.463	-0.110159	5.78466e-05	1	PCEC1	0.404	0.484	0.205442	3.97417e-05	1	PCEC2	0.664	0.431	-0.20416	3.59491e-21	1.06895e-16
293	2210018M11Rik							GE1	0.215	0.318	-0.215746	8.21254e-06	0.2442																			AVR	0.246	0.317	-0.130826	0.000832712	1	PCEC1	0.239	0.35	-0.211494	2.29883e-16	6.83558e-12	PCEC2	0.573	0.28	0.0914285	7.67538e-43	2.28227e-38
294	2210404O09Rik																																											PCEC2	0.204	0.121	-0.305702	1.80732e-07	0.00537407
295	2210406O10Rik													GE2	0.014	0.005	0.000517353	0.00763088	1
296	2210408F21Rik													GE2	0.167	0.212	-0.29716	0.00690987	1	EA	0.131	0.212	-1.01352	0.00010083	1													PCEC1	0.168	0.229	0.045066	1.76232e-06	0.0524025	PCEC2	0.376	0.188	0.297393	7.61173e-22	2.26335e-17
297	2210408I21Rik																																					PCEC1	0.047	0.078	-0.17332	1.50021e-05	0.446087	PCEC2	0.136	0.059	-0.0760642	2.31745e-11	6.89093e-07
298	2210409E12Rik																									DVR	0.006	0.001	0.00774706	0.00254592	1
299	2210411M09Rik	AA	0.395	0.266	0.339996	1.95775e-05	0.582136																																					PCEC2	0.342	0.263	-0.178231	0.00692745	1
300	2210417A02Rik																									DVR	0.006	0	0.215565	0.00045177	1
301	2300009A05Rik																																					PCEC1	0.123	0.168	0.346456	6.31476e-05	1	PCEC2	0.26	0.14	0.067546	4.81948e-13	1.43307e-08
302	2310001H17Rik																			EA	0.259	0.201	1.00431	0.00115271	1	DVR	0.253	0.201	0.375341	0.00663078	1	AVR	0.157	0.21	-0.0764076	0.0061261	1	PCEC1	0.148	0.237	-0.179711	1.65826e-13	4.93084e-09	PCEC2	0.409	0.181	0.220057	1.13254e-31	3.36762e-27
303	2310001K24Rik																																					PCEC1	0.024	0.041	-0.094253	0.00118026	1	PCEC2	0.069	0.031	0.209099	5.35615e-06	0.159265
304	2310002F09Rik																																					PCEC1	0.018	0.035	-0.26766	0.00036611	1	PCEC2	0.067	0.024	0.390325	1.98947e-08	0.00059157
305	2310007B03Rik
306	2310009A05Rik																															AVR	0.215	0.271	-0.117184	0.00408932	1	PCEC1	0.203	0.3	-0.195851	1.09199e-13	3.24702e-09	PCEC2	0.494	0.239	0.491191	7.37684e-36	2.1935e-31
307	2310009B15Rik																																					PCEC1	0.066	0.11	-0.0793286	1.46114e-07	0.0043447	PCEC2	0.174	0.085	0.274004	8.69246e-11	2.5847e-06
308	2310010G23Rik
309	2310010J17Rik																			EA	0.105	0.069	0.495162	0.00788028	1	DVR	0.15	0.065	0.612253	8.99414e-10	2.67441e-05							PCEC1	0.047	0.085	-0.286446	2.14938e-07	0.00639119	PCEC2	0.107	0.067	-0.00328967	0.00126004	1
310	2310011J03Rik																															AVR	0.373	0.457	-0.173127	2.17106e-05	0.645564	PCEC1	0.377	0.489	0.0508617	3.31396e-12	9.85406e-08	PCEC2	0.741	0.415	-0.0560539	6.21678e-45	1.84856e-40
311	2310015A10Rik																																					PCEC1	0.048	0.069	0.0274159	0.00223365	1	PCEC2	0.125	0.054	-0.0271881	1.30619e-10	3.88397e-06
312	2310016G11Rik							GE1	0.002	0	0.00203159	0.0013242	1
313	2310022A10Rik	AA	0.381	0.453	-0.332812	0.0041777	1							GE2	0.591	0.434	-0.0937984	1.3488e-12	4.01065e-08																			PCEC1	0.379	0.491	0.0412241	2.3106e-15	6.87057e-11	PCEC2	0.561	0.438	-0.373588	3.62813e-10	1.07883e-05
314	2310022B05Rik													GE2	0.657	0.578	0.535447	9.07433e-09	0.000269825							DVR	0.518	0.591	-0.885833	9.176e-06	0.272848	AVR	0.484	0.598	-0.382402	4.42872e-10	1.31688e-05	PCEC1	0.504	0.634	-0.13171	6.77891e-24	2.01571e-19	PCEC2	0.879	0.553	-0.0247115	2.07828e-54	6.17976e-50
315	2310030G06Rik																									DVR	0.089	0.055	0.76378	0.00463878	1							PCEC1	0.038	0.068	-0.547254	1.95895e-06	0.0582493	PCEC2	0.103	0.052	-0.550544	1.69577e-06	0.0504238
316	2310031A07Rik																																					PCEC1	0.162	0.242	-0.169952	1.78341e-11	5.30298e-07	PCEC2	0.338	0.199	-0.151894	8.57874e-12	2.55089e-07
317	2310033P09Rik																															AVR	0.224	0.284	-0.105414	0.00252098	1	PCEC1	0.216	0.313	0.101697	4.77019e-12	1.41842e-07	PCEC2	0.49	0.254	0.248026	6.63976e-29	1.97433e-24
318	2310034G01Rik
319	2310034O05Rik
320	2310035C23Rik																																					PCEC1	0.208	0.297	-0.115651	4.06554e-12	1.20889e-07	PCEC2	0.436	0.246	-0.0229606	3.0353e-19	9.02546e-15
321	2310036O22Rik																																					PCEC1	0.412	0.564	-0.146211	1.38277e-22	4.11166e-18	PCEC2	0.799	0.476	0.233617	2.47939e-34	7.37246e-30
322	2310039H08Rik																																					PCEC1	0.111	0.165	0.0654662	3.32779e-07	0.0098952	PCEC2	0.277	0.131	0.260652	7.35873e-19	2.18812e-14
323	2310040G07Rik	AA	0.019	0.004	0.477572	0.00183638	1
324	2310040G24Rik																																					PCEC1	0.07	0.101	-0.0464129	0.000189459	1	PCEC2	0.204	0.077	0.601116	1.7828e-22	5.30115e-18
325	2310043M15Rik
326	2310044K18Rik
327	2310045N01Rik																															AVR	0.308	0.385	-0.193204	0.000371444	1	PCEC1	0.305	0.418	0.00877248	1.48118e-12	4.40429e-08	PCEC2	0.591	0.352	-0.109476	3.4537e-21	1.02696e-16
328	2310047M10Rik													GE2	0.25	0.193	0.41962	0.00168003	1																			PCEC1	0.146	0.229	-0.0880018	2.34618e-12	6.97637e-08	PCEC2	0.36	0.181	-0.117367	2.79271e-21	8.30411e-17
329	2310057J18Rik
330	2310057M21Rik																																					PCEC1	0.106	0.166	-0.124877	5.57766e-09	0.000165852	PCEC2	0.291	0.127	-0.219062	3.78214e-23	1.12462e-18
331	2310058D17Rik
332	2310061I04Rik							GE1	0.253	0.203	0.464446	0.00670979	1																									PCEC1	0.171	0.228	0.108531	2.69616e-06	0.0801703	PCEC2	0.394	0.186	0.157896	1.13549e-28	3.37638e-24
333	2310067B10Rik	AA	0.479	0.587	-0.0846981	0.000734076	1																			DVR	0.496	0.589	-0.421969	8.67498e-06	0.257951							PCEC1	0.531	0.613	0.14947	3.77404e-05	1	PCEC2	0.817	0.557	0.0916416	2.87976e-22	8.56296e-18
334	2310068J16Rik																																											PCEC2	0.128	0.078	0.498376	8.65442e-05	1
335	2410002F23Rik																																					PCEC1	0.266	0.374	-0.0945521	5.36081e-14	1.59404e-09	PCEC2	0.562	0.309	-0.0194884	9.88184e-33	2.93837e-28
336	2410004B18Rik																																					PCEC1	0.244	0.338	0.144754	4.19207e-10	1.24651e-05	PCEC2	0.542	0.277	0.134157	6.47741e-35	1.92606e-30
337	2410006H16Rik							GE1	0.292	0.371	-0.420991	0.000133722	1	GE2	0.434	0.356	0.222351	0.000105532	1																			PCEC1	0.273	0.416	-0.278647	4.40773e-23	1.31064e-18	PCEC2	0.622	0.335	0.205486	6.03823e-30	1.79547e-25
338	2410012E07Rik							GE1	0.006	0.001	0.0106847	0.00961562	1
339	2410015M20Rik	AA	0.586	0.463	0.22352	0.000259219	1																									AVR	0.368	0.48	-0.354406	1.39418e-07	0.00414559	PCEC1	0.379	0.519	-0.0810182	8.33754e-16	2.47917e-11	PCEC2	0.72	0.44	0.123092	4.27385e-22	1.27083e-17
340	2410016O06Rik							GE1	0.373	0.285	1.23942	2.5941e-08	0.000771356	GE2	0.417	0.279	0.831086	7.27678e-14	2.16375e-09							DVR	0.189	0.3	-1.10235	1.8706e-06	0.0556221	AVR	0.191	0.305	-0.67923	9.85452e-10	2.93024e-05	PCEC1	0.238	0.325	-0.382041	5.07006e-12	1.50758e-07	PCEC2	0.505	0.269	-0.647092	4.03151e-26	1.19877e-21
341	2410018L13Rik													GE2	0.336	0.256	0.32101	0.000226414	1
342	2410022M11Rik													GE2	0.158	0.205	-0.597513	0.00441322	1													AVR	0.131	0.208	-0.771189	3.20196e-06	0.0952104	PCEC1	0.171	0.216	0.304832	0.000380916	1	PCEC2	0.421	0.175	0.410457	3.24466e-41	9.64798e-37
343	2410024N13Rik																																											PCEC2	0.02	0.008	0.0312719	0.00632681	1
344	2410080I02Rik																																											PCEC2	0.051	0.03	0.207207	0.00837044	1
345	2410089E03Rik																																					PCEC1	0.147	0.193	0.369558	0.000176802	1	PCEC2	0.333	0.158	0.102379	3.07431e-23	9.14146e-19
346	2410127L17Rik																																					PCEC1	0.056	0.082	0.0355036	0.000479671	1	PCEC2	0.121	0.067	0.34976	7.69593e-06	0.228839
347	2410131K14Rik																																					PCEC1	0.091	0.131	-0.160366	1.28432e-05	0.381892	PCEC2	0.208	0.106	-0.177678	9.00713e-13	2.67827e-08
348	2410137M14Rik
349	2410141K09Rik
350	2500002B13Rik																									DVR	0.187	0.103	1.10047	2.82871e-07	0.00841117							PCEC1	0.081	0.125	-0.195059	9.6527e-07	0.0287023	PCEC2	0.148	0.104	-0.130915	0.00235134	1
351	2500004C02Rik																																					PCEC1	0.113	0.155	0.0453967	7.0554e-05	1	PCEC2	0.215	0.131	-0.117098	7.28592e-08	0.00216647
352	2510002D24Rik	AA	0.414	0.315	0.515242	0.000884437	1																									AVR	0.22	0.331	-0.441358	2.63139e-08	0.000782445	PCEC1	0.256	0.355	-0.049367	2.47849e-12	7.3698e-08	PCEC2	0.593	0.288	-0.222892	1.57986e-43	4.69772e-39
353	2510009E07Rik							GE1	0.325	0.385	-0.139765	0.00779255	1																									PCEC1	0.33	0.408	0.230264	3.38682e-05	1	PCEC2	0.647	0.349	0.087708	8.87482e-38	2.63893e-33
354	2510039O18Rik																																					PCEC1	0.134	0.197	-0.110338	1.82344e-08	0.000542199	PCEC2	0.36	0.153	0.436535	2.80349e-34	8.33619e-30
355	2510046G10Rik																																					PCEC1	0.216	0.277	0.207148	0.000106359	1	PCEC2	0.467	0.231	0.475934	3.66947e-27	1.09112e-22
356	2600014E21Rik
357	2610001A08Rik
358	2610001J05Rik	AA	0.66	0.531	0.119479	0.000632571	1																									AVR	0.453	0.546	-0.26393	6.72221e-07	0.0199885	PCEC1	0.446	0.588	-0.0261831	6.08055e-18	1.80805e-13	PCEC2	0.837	0.502	0.220765	5.13121e-42	1.52576e-37
359	2610002M06Rik																																					PCEC1	0.179	0.258	-0.284545	8.56076e-11	2.54554e-06	PCEC2	0.438	0.206	0.373662	7.61627e-34	2.2647e-29
360	2610005L07Rik																																					PCEC1	0.634	0.717	-0.020673	6.66097e-05	1	PCEC2	0.816	0.672	0.0809025	2.11543e-05	0.629024
361	2610008E11Rik																																					PCEC1	0.139	0.187	0.1076	3.81938e-05	1	PCEC2	0.324	0.152	0.0370184	1.43025e-22	4.25284e-18
362	2610015P09Rik																																					PCEC1	0.078	0.132	0.0742244	3.70069e-09	0.00011004	PCEC2	0.213	0.101	0.440044	3.94394e-15	1.17273e-10
363	2610020C07Rik													GE2	0.127	0.087	0.181696	0.00159504	1																			PCEC1	0.066	0.106	-0.0883211	9.82055e-07	0.0292014	PCEC2	0.136	0.086	-0.254484	0.000479015	1
364	2610020F03Rik													GE2	0.002	0	0.00183124	0.00300224	1
365	2610020H08Rik																																					PCEC1	0.122	0.179	0.323402	8.55484e-08	0.00254378	PCEC2	0.255	0.148	0.277481	1.12785e-11	3.35366e-07
366	2610021A01Rik																																					PCEC1	0.055	0.096	-0.0770215	1.32608e-07	0.00394311	PCEC2	0.175	0.07	0.143946	3.17678e-17	9.44616e-13
367	2610027K06Rik																															AVR	0.055	0.089	0.0758092	0.0052598	1
368	2610028E06Rik													GE2	0.011	0.003	0.00872369	0.00342873	1
369	2610028H24Rik													GE2	0.088	0.026	0.242761	1.03689e-14	3.08319e-10																			PCEC1	0.015	0.043	-0.00536413	1.49602e-08	0.000444842
370	2610035D17Rik																			EA	0.09	0.039	1.22421	2.60379e-06	0.0774236	DVR	0.078	0.039	1.15596	0.00033466	1							PCEC1	0.022	0.054	-1.03178	1.15987e-08	0.000344888	PCEC2	0.087	0.037	0.760296	3.63087e-08	0.00107964
371	2610035F20Rik
372	2610037D02Rik																																											PCEC2	0.076	0.048	-0.0680018	0.00467333	1
373	2610042L04Rik																															AVR	0.014	0.005	0.0244367	0.00805639	1
374	2610044O15Rik8																																					PCEC1	0.207	0.313	-0.2124	1.10844e-14	3.29593e-10	PCEC2	0.438	0.256	0.0150952	3.36308e-16	1.00001e-11
375	2610203C20Rik																									DVR	0.106	0.047	1.31035	4.12785e-07	0.0122742
376	2610203C22Rik	AA	0.279	0.41	-1.43967	1.33863e-06	0.0398043													EA	0.291	0.413	-0.783082	4.61112e-07	0.0137112	DVR	0.334	0.41	-0.875591	0.000120132	1													PCEC2	0.693	0.373	0.307443	5.07682e-40	1.50959e-35
377	2610204G07Rik													GE2	0.004	0	0.0249706	0.00122795	1
378	2610206C17Rik																																					PCEC1	0.135	0.204	-0.187005	1.20652e-09	3.58758e-05	PCEC2	0.23	0.173	0.190717	0.00129205	1
379	2610301B20Rik																															AVR	0.117	0.203	-0.158755	5.35519e-07	0.0159237	PCEC1	0.154	0.216	-0.100742	1.30997e-07	0.00389519	PCEC2	0.376	0.173	-0.373791	1.91478e-28	5.69361e-24
380	2610305D13Rik							GE1	0.122	0.182	-0.528826	0.000760434	1																									PCEC1	0.157	0.189	0.255036	0.00970057	1	PCEC2	0.297	0.164	-0.0295236	3.87206e-13	1.15136e-08
381	2610306M01Rik																																					PCEC1	0.078	0.115	-0.0120156	1.56404e-05	0.465067	PCEC2	0.215	0.089	-0.0535227	7.73293e-20	2.29939e-15
382	2610307P16Rik																			EA	0.041	0.079	-1.69056	0.00778922	1																			PCEC2	0.161	0.067	0.346243	6.37933e-15	1.89689e-10
383	2610318N02Rik
384	2610507B11Rik																									DVR	0.496	0.428	0.186211	0.00318852	1	AVR	0.361	0.441	-0.0808559	6.65435e-05	1	PCEC1	0.346	0.482	-0.121067	6.65844e-18	1.97989e-13	PCEC2	0.707	0.401	-0.0532225	3.56113e-34	1.0589e-29
385	2610524H06Rik							GE1	0.041	0.089	-0.762267	0.000317216	1																															PCEC2	0.19	0.073	0.211704	4.20463e-20	1.25025e-15
386	2700012I20Rik																																					PCEC1	0.018	0.031	0.140338	0.00389864	1	PCEC2	0.061	0.022	0.161601	6.35281e-08	0.00188901
387	2700016F22Rik																																					PCEC1	0.199	0.272	0.0887219	9.6662e-08	0.00287424	PCEC2	0.454	0.222	0.0551451	2.19065e-26	6.51389e-22
388	2700029M09Rik																																					PCEC1	0.181	0.292	-0.0651135	3.11411e-17	9.25981e-13	PCEC2	0.463	0.228	0.170424	7.66107e-30	2.27802e-25
389	2700033N17Rik	AA	0.167	0.24	-1.37178	0.00281184	1													EA	0.302	0.232	0.430876	0.00149159	1							AVR	0.182	0.243	-0.19904	0.00098412	1							PCEC2	0.392	0.219	0.174995	3.52511e-17	1.04819e-12
390	2700038G22Rik													GE2	0.183	0.129	0.132253	0.000558805	1																			PCEC1	0.099	0.155	0.265095	2.18957e-08	0.000651069	PCEC2	0.251	0.121	-0.233374	1.41783e-16	4.21592e-12
391	2700046A07Rik																									DVR	0.014	0.002	0.531646	2.74893e-05	0.817394
392	2700046G09Rik																																					PCEC1	0.027	0.049	0.143391	0.000110954	1	PCEC2	0.089	0.036	0.0126562	4.19562e-09	0.000124757
393	2700049A03Rik																																					PCEC1	0.068	0.118	-0.136472	6.24056e-09	0.000185563	PCEC2	0.208	0.087	-0.0354301	1.0913e-18	3.24498e-14
394	2700060E02Rik																																					PCEC1	0.576	0.701	-0.0811312	4.98363e-13	1.48188e-08	PCEC2	0.882	0.63	0.0893049	4.92851e-14	1.46549e-09
395	2700062C07Rik																															AVR	0.119	0.17	-0.00555618	0.0021321	1	PCEC1	0.116	0.192	-0.346537	7.89722e-13	2.34824e-08	PCEC2	0.325	0.146	0.0980011	1.23467e-25	3.67131e-21
396	2700069I18Rik																																					PCEC1	0.01	0.019	-0.00874661	0.00651374	1	PCEC2	0.033	0.014	0.0243377	0.00067373	1
397	2700078F05Rik							GE1	0.019	0.045	-0.0789714	0.00673918	1																									PCEC1	0.03	0.05	-0.0498093	0.000407577	1	PCEC2	0.074	0.039	0.123819	7.08541e-05	1
398	2700081O15Rik																																					PCEC1	0.21	0.276	-0.0858462	2.29038e-06	0.0681043	PCEC2	0.378	0.237	0.248653	6.42249e-13	1.90973e-08
399	2700094K13Rik																			EA	0.273	0.363	-0.776732	0.000141246	1													PCEC1	0.31	0.385	0.227124	6.00883e-05	1	PCEC2	0.555	0.335	0.00516352	5.22454e-18	1.55352e-13
400	2700097O09Rik																																					PCEC1	0.122	0.181	-0.279384	2.79674e-08	0.00083161	PCEC2	0.333	0.14	0.315456	3.09359e-31	9.19878e-27
401	2700099C18Rik
402	2810001G20Rik																																					PCEC1	0.085	0.138	-0.152265	8.94558e-09	0.000265997	PCEC2	0.221	0.108	-0.290738	1.42726e-13	4.24396e-09
403	2810002D19Rik																																					PCEC1	0.128	0.161	-0.0557004	0.00218303	1	PCEC2	0.268	0.136	0.171876	9.64758e-15	2.86871e-10
404	2810004N23Rik	AA	0.256	0.176	-0.0982165	0.00477648	1																															PCEC1	0.135	0.204	-0.185354	5.02918e-10	1.49543e-05	PCEC2	0.306	0.165	0.405868	2.12244e-15	6.31107e-11
405	2810006K23Rik																															AVR	0.134	0.205	-0.132103	7.84186e-05	1	PCEC1	0.159	0.219	0.0951206	1.49555e-07	0.00444701	PCEC2	0.374	0.177	0.422796	2.55238e-29	7.58951e-25
406	2810013P06Rik																																					PCEC1	0.309	0.367	0.0968482	0.000342732	1	PCEC2	0.6	0.317	0.146714	9.33246e-35	2.77501e-30
407	2810025M15Rik	AA	0.488	0.676	-1.58079	7.97574e-17	2.37159e-12							GE2	0.648	0.671	-0.307096	0.00699776	1	EA	0.547	0.677	-0.682894	9.9982e-11	2.97297e-06	DVR	0.593	0.674	-0.755806	1.00232e-09	2.9804e-05							PCEC1	0.652	0.679	0.397183	0.000108447	1	PCEC2	0.913	0.641	0.137221	5.83692e-22	1.73561e-17
408	2810032G03Rik	AA	0.005	0	0.00518707	0.00884809	1
409	2810039B14Rik																																					PCEC1	0.09	0.134	0.2649	3.82486e-06	0.113732	PCEC2	0.152	0.114	-0.10175	0.00810635	1
410	2810049E08Rik																															AVR	0.002	0	0.00444187	0.00375008	1
411	2810402E24Rik																																					PCEC1	0.108	0.15	0.0257652	2.51737e-05	0.748539	PCEC2	0.226	0.124	0.156316	4.22602e-11	1.25661e-06
412	2810403A07Rik							GE1	0.654	0.673	-0.368271	0.0047589	1	GE2	0.752	0.662	0.219515	1.25824e-05	0.374137																			PCEC1	0.565	0.732	-0.141146	5.50054e-26	1.63559e-21	PCEC2	0.922	0.643	0.132147	5.40596e-30	1.60746e-25
413	2810403D21Rik							GE1	0.228	0.293	-0.093161	0.00417267	1																			AVR	0.355	0.28	0.23206	0.000133277	1	PCEC1	0.237	0.317	-0.356166	2.56753e-10	7.63454e-06	PCEC2	0.401	0.275	0.433504	5.85819e-11	1.74193e-06
414	2810404F17Rik
415	2810405F15Rik																																											PCEC2	0.06	0.017	0.437868	2.74328e-11	8.15715e-07
416	2810405F17Rik																																					PCEC1	0.026	0.044	0.12527	0.000772668	1	PCEC2	0.119	0.029	0.78749	3.70503e-26	1.10169e-21
417	2810407A14Rik																									DVR	0.031	0.012	0.82318	0.00219796	1	AVR	0.026	0.011	0.334449	0.00373419	1
418	2810408A11Rik
419	2810408I11Rik																																					PCEC1	0.029	0.073	-0.838326	1.28989e-11	3.8355e-07	PCEC2	0.108	0.051	-0.0997396	2.46101e-08	0.00073178
420	2810410L24Rik													GE2	0.079	0.114	-0.432858	0.00865253	1													AVR	0.076	0.114	-0.585826	0.00331505	1							PCEC2	0.219	0.098	0.348162	6.742e-17	2.00473e-12
421	2810414N06Rik																									DVR	0.075	0.015	0.21059	1.98806e-16	5.91151e-12							PCEC1	0.008	0.025	0.0239402	1.04438e-05	0.310547
422	2810417H13Rik																																					PCEC1	0.091	0.123	-0.308359	0.000326768	1	PCEC2	0.146	0.107	-0.154323	0.00385647	1
423	2810425M01Rik																															AVR	0.184	0.241	-0.15624	0.00425345	1	PCEC1	0.186	0.264	-0.0276701	2.02955e-09	6.03488e-05	PCEC2	0.441	0.212	0.425542	5.85374e-29	1.74061e-24
424	2810428I15Rik																															AVR	0.396	0.524	-0.363061	7.97647e-09	0.00023718	PCEC1	0.45	0.545	0.00255394	7.4937e-07	0.0222825	PCEC2	0.785	0.48	0.172408	1.60413e-29	4.76988e-25
425	2810429I04Rik
426	2810454H06Rik																																					PCEC1	0.079	0.122	-0.158861	1.82408e-06	0.054239	PCEC2	0.183	0.098	0.510183	2.41122e-09	7.16977e-05
427	2810455O05Rik																																					PCEC1	0.009	0.022	-0.193572	0.000531715	1	PCEC2	0.031	0.015	-0.163416	0.00856972	1
428	2810459M11Rik																									DVR	0.003	0	0.020996	0.00016311	1
429	2810468N07Rik																																					PCEC1	0.02	0.034	0.495306	0.00340447	1	PCEC2	0.058	0.026	0.0183389	1.77528e-05	0.52788
430	2810474O19Rik	AA	0.735	0.642	0.305912	0.00111475	1	GE1	0.582	0.652	-0.14147	0.000604601	1							EA	0.663	0.645	0.55774	0.00311918	1	DVR	0.585	0.65	-0.566221	1.1198e-05	0.332974	AVR	0.59	0.652	-0.11277	0.00210843	1	PCEC1	0.589	0.678	0.0305708	1.72096e-06	0.0511728	PCEC2	0.91	0.616	0.12289	1.56913e-35	4.66579e-31
431	2900005J15Rik																																					PCEC1	0.012	0.027	0.441003	0.000247196	1	PCEC2	0.045	0.019	-0.232823	5.9193e-05	1
432	2900009J06Rik																																											PCEC2	0.024	0.005	0.0665957	2.63824e-06	0.078448
433	2900011O08Rik																			EA	0.003	0	0.0076989	0.000114698	1
434	2900026A02Rik																																					PCEC1	0.294	0.404	-0.186201	1.10946e-13	3.29899e-09	PCEC2	0.559	0.342	-0.0883548	6.42082e-20	1.90923e-15
435	2900035J10Rik
436	2900041M22Rik																			EA	0.073	0.035	0.747112	0.000253674	1							AVR	0.017	0.039	-0.59059	0.0073934	1	PCEC1	0.023	0.045	-0.496076	1.76312e-05	0.524263	PCEC2	0.072	0.033	0.251378	4.02695e-06	0.119741
437	2900052L18Rik																			EA	0.09	0.153	-0.857488	0.000898482	1	DVR	0.086	0.154	-0.506516	0.000324187	1	AVR	0.107	0.154	-0.312991	0.00222667	1							PCEC2	0.331	0.129	0.358963	1.6299e-35	4.84651e-31
438	2900052N01Rik
439	2900055J20Rik
440	2900076A07Rik																															AVR	0.04	0.09	-0.853089	3.65403e-05	1	PCEC1	0.068	0.094	0.201613	0.00272421	1	PCEC2	0.212	0.07	0.663792	1.07338e-28	3.19169e-24
441	2900092N22Rik
442	2900093K20Rik																																											PCEC2	0.127	0.081	0.188966	0.000499014	1
443	2900097C17Rik													GE2	0.149	0.108	0.100439	0.00509915	1																			PCEC1	0.079	0.132	-0.0995455	1.53095e-08	0.000455228	PCEC2	0.15	0.108	0.0891771	0.00511553	1
444	3000002C10Rik																																					PCEC1	0.13	0.187	-0.305215	4.48979e-07	0.0133504	PCEC2	0.233	0.158	0.464043	3.50444e-06	0.104204
445	3010003L21Rik	AA	0.042	0.094	-0.584267	0.00787575	1																															PCEC1	0.07	0.105	-0.0451745	2.84796e-05	0.84684	PCEC2	0.157	0.085	0.105743	1.36398e-07	0.0040558
446	3010026O09Rik													GE2	0.117	0.074	0.300811	0.000367024	1																			PCEC1	0.056	0.092	0.0183193	4.32033e-06	0.128465	PCEC2	0.143	0.071	-0.120066	5.00515e-09	0.000148828
447	3110001I22Rik																																					PCEC1	0.16	0.212	-0.143125	3.2222e-05	0.95812	PCEC2	0.257	0.186	-0.171488	0.000738939	1
448	3110002H16Rik																																					PCEC1	0.286	0.402	0.181519	2.78261e-14	8.27409e-10	PCEC2	0.6	0.333	-0.25612	2.85395e-33	8.48623e-29
449	3110009E18Rik
450	3110021N24Rik																																											PCEC2	0.083	0.053	0.0161616	0.00446372	1
451	3110035E14Rik	AA	0.116	0.207	-1.19702	0.000268022	1													EA	0.116	0.209	-0.635131	2.96413e-05	0.881383	DVR	0.153	0.207	-0.652194	0.00636865	1													PCEC2	0.335	0.189	0.143741	3.52047e-13	1.04681e-08
452	3110040N11Rik																																											PCEC2	0.246	0.126	-0.229348	2.01767e-13	5.99953e-09
453	3110043O21Rik																																					PCEC1	0.154	0.206	-0.0222093	3.72413e-06	0.110737	PCEC2	0.362	0.167	-0.0598401	5.1435e-28	1.52942e-23
454	3110052M02Rik																																											PCEC2	0.076	0.041	-0.0823339	0.000152966	1
455	3110053B16Rik													GE2	0.167	0.119	0.174489	0.00131375	1
456	3110056K07Rik																																											PCEC2	0.184	0.092	0.0190069	1.00583e-10	2.99083e-06
457	3110057O12Rik																									DVR	0.248	0.176	-0.258154	0.000678086	1							PCEC1	0.131	0.209	-0.270926	3.32029e-13	9.87287e-09	PCEC2	0.259	0.172	0.224063	7.26348e-08	0.0021598
458	3110062M04Rik	AA	0.893	0.915	-0.491243	6.18578e-05	1							GE2	0.878	0.919	-0.382881	1.49317e-08	0.000443994	EA	0.866	0.918	-0.473908	4.23546e-09	0.000125941	DVR	0.889	0.916	-0.626351	9.26718e-12	2.7556e-07							PCEC1	0.915	0.914	0.411166	4.45834e-15	1.32569e-10	PCEC2	0.991	0.906	0.0206469	5.87524e-11	1.747e-06
459	3110070M22Rik																																											PCEC2	0.031	0.012	0.110882	0.000379914	1
460	3110082I17Rik							GE1	0.104	0.179	-0.706283	1.6847e-05	0.500945							EA	0.218	0.169	0.803257	0.00509813	1													PCEC1	0.109	0.209	-0.557246	1.1962e-21	3.55691e-17	PCEC2	0.412	0.145	0.315384	6.44393e-54	1.9161e-49
461	3110083C13Rik																																					PCEC1	0.004	0.011	0.00105351	0.00538866	1
462	3110099E03Rik							GE1	0.232	0.323	-1.0942	5.54454e-07	0.0164867	GE2	0.262	0.321	-0.66175	0.000277474	1							DVR	0.256	0.319	-0.902001	0.00098708	1							PCEC1	0.253	0.351	0.202968	3.98168e-09	0.000118395	PCEC2	0.66	0.276	0.571878	3.03212e-73	9.01601e-69
463	3222401L13Rik																																											PCEC2	0.136	0.074	-0.372754	7.21916e-07	0.0214662
464	3300002A11Rik
465	3425401B19Rik
466	3632451O06Rik
467	3830406C13Rik																															AVR	0.207	0.263	-0.497886	0.00103935	1	PCEC1	0.187	0.297	0.0461473	3.72499e-16	1.10762e-11	PCEC2	0.474	0.232	-0.118657	4.65063e-32	1.38287e-27
468	3830408C21Rik																			EA	0.017	0.004	0.224739	0.00137982	1
469	3830432H09Rik							GE1	0.006	0.001	-0.0626492	0.00430099	1
470	4430402I18Rik																																					PCEC1	0.074	0.123	0.2275	4.64267e-08	0.0013805	PCEC2	0.231	0.091	0.551386	8.59795e-24	2.5566e-19
471	4631405J19Rik							GE1	0.321	0.161	2.01791	2.57754e-25	7.66431e-21	GE2	0.366	0.153	1.63216	1.94489e-44	5.78314e-40	EA	0.105	0.179	-2.29654	0.000159561	1	DVR	0.123	0.178	-2.20527	0.00235002	1	AVR	0.093	0.185	-2.38987	3.36796e-09	0.000100146	PCEC1	0.09	0.223	-2.00661	1.39663e-38	4.15287e-34	PCEC2	0.302	0.16	-0.853249	4.29436e-14	1.27693e-09
472	4632404H12Rik																																					PCEC1	0.063	0.096	0.173159	2.71351e-05	0.806861	PCEC2	0.116	0.08	0.182601	0.00332369	1
473	4632411P08Rik																									DVR	0.17	0.117	-0.190925	0.00649319	1							PCEC1	0.089	0.139	0.13598	1.0011e-07	0.00297677	PCEC2	0.203	0.111	-0.0178277	1.86416e-10	5.54308e-06
474	4632415L05Rik																									DVR	0.329	0.252	-0.163044	0.00130336	1							PCEC1	0.204	0.287	-0.0410677	6.56716e-10	1.95274e-05	PCEC2	0.445	0.235	0.397078	4.47401e-23	1.33035e-18
475	4632427E13Rik																															AVR	0.188	0.277	-0.333837	2.26278e-06	0.0672837	PCEC1	0.225	0.292	0.119294	6.43202e-06	0.191256	PCEC2	0.403	0.252	-0.190839	4.30545e-12	1.28023e-07
476	4632428C04Rik																																					PCEC1	0.004	0.012	-0.139992	0.00250941	1	PCEC2	0.031	0.007	0.297034	1.99884e-08	0.000594356
477	4632428N05Rik	AA	0.53	0.444	0.252085	0.00253061	1																									AVR	0.327	0.462	-0.389452	3.1527e-11	9.37455e-07	PCEC1	0.353	0.502	-0.543047	9.4621e-31	2.81356e-26	PCEC2	0.712	0.418	-0.143184	1.06187e-38	3.15746e-34
478	4632433K11Rik																									DVR	0.134	0.088	0.64448	0.00327433	1
479	4731419I09Rik	AA	0.819	0.844	-0.449796	0.000173896	1	GE1	0.76	0.851	-0.72505	3.87503e-25	1.15224e-20	GE2	0.741	0.855	-0.960366	8.64325e-43	2.57007e-38	EA	0.892	0.84	0.43345	1.55143e-12	4.61319e-08	DVR	0.877	0.841	0.186135	0.000200898	1							PCEC1	0.841	0.845	0.357437	4.6328e-16	1.37756e-11	PCEC2	0.978	0.828	-0.00642347	2.94266e-06	0.0875
480	4732414G09Rik
481	4732419C18Rik																			EA	0.02	0.065	-0.147786	0.000810451	1													PCEC1	0.05	0.07	-0.02908	0.00268426	1	PCEC2	0.094	0.059	0.133443	0.00102398	1
482	4732440D04Rik																																					PCEC1	0.141	0.193	0.0543332	6.10214e-06	0.181447	PCEC2	0.253	0.165	0.145421	6.93946e-07	0.0206345
483	4732456N10Rik																																											PCEC2	0.004	0	0.0143464	0.00116399	1
484	4732463B04Rik													GE2	0.039	0.021	0.0459249	0.00660312	1
485	4732465J04Rik																																					PCEC1	0.011	0.02	-0.0253941	0.0062079	1
486	4732471J01Rik	AA	0.074	0.205	-1.75341	1.08095e-06	0.0321421	GE1	0.112	0.208	-1.11054	7.40571e-08	0.00220209	GE2	0.131	0.208	-1.05366	2.46151e-06	0.0731931																			PCEC1	0.214	0.192	0.585002	0.00326081	1	PCEC2	0.336	0.184	0.194677	4.35832e-15	1.29595e-10
487	4732487G21Rik													GE2	0.118	0.072	0.466248	9.47536e-05	1																			PCEC1	0.052	0.091	-0.201401	2.08941e-07	0.00621287
488	4732490B19Rik	AA	0.005	0	-0.0179521	0.00884809	1													EA	0.006	0	0.365513	1.65978e-05	0.493537
489	4732491K20Rik																																											PCEC2	0.076	0.039	-0.356688	5.07111e-05	1
490	4831440E17Rik																																											PCEC2	0.024	0.01	0.0562663	0.00673151	1
491	4833407H14Rik
492	4833412K13Rik
493	4833413E03Rik							GE1	0.017	0.003	0.687428	1.08272e-05	0.321946
494	4833417C18Rik																																											PCEC2	0.098	0.048	0.094795	9.65121e-07	0.0286979
495	4833418N02Rik																																											PCEC2	0.036	0.019	-0.130873	0.00640106	1
496	4833420G17Rik																															AVR	0.255	0.315	-0.102659	0.00360214	1	PCEC1	0.256	0.339	0.0840322	3.07914e-08	0.000915582	PCEC2	0.553	0.281	0.227801	1.15329e-33	3.42931e-29
497	4833421G17Rik																																					PCEC1	0.019	0.032	-0.228834	0.00494505	1	PCEC2	0.071	0.022	0.86008	3.56774e-11	1.06087e-06
498	4833422C13Rik																																					PCEC1	0.005	0.017	-0.211192	0.000133628	1
499	4833422M21Rik																									DVR	0.075	0.044	0.0372299	0.00699511	1							PCEC1	0.025	0.058	-0.0852916	3.08944e-08	0.000918646
500	4833427F10Rik
501	4833427G06Rik																																											PCEC2	0.002	0	0.0149761	0.0028878	1
502	4833428L15Rik																																											PCEC2	0.002	0	0.00188383	0.0028878	1
503	4833439L19Rik																									DVR	0.819	0.766	0.186346	0.0051964	1	AVR	0.742	0.773	-0.158415	4.33809e-05	1	PCEC1	0.711	0.803	0.0529471	2.34349e-12	6.96838e-08	PCEC2	0.966	0.748	-0.0246345	1.07584e-31	3.19902e-27
504	4833445I07Rik																																					PCEC1	0.017	0.029	-0.218905	0.00825238	1
505	4921507G05Rik
506	4921509C19Rik
507	4921513I03Rik	AA	0.028	0.004	-0.0460706	9.88659e-07	0.0293978
508	4921514A10Rik																			EA	0.186	0.245	-0.458396	0.0079112	1													PCEC1	0.214	0.257	0.200078	0.00461233	1	PCEC2	0.333	0.231	-0.174307	2.7498e-05	0.817654
509	4921518K17Rik																																					PCEC1	0.021	0.036	-0.0212907	0.00249997	1	PCEC2	0.049	0.028	0.058271	0.00665449	1
510	4921522P10Rik																																					PCEC1	0.01	0.025	-0.158672	8.18966e-05	1	PCEC2	0.043	0.016	-0.216263	1.51729e-05	0.451167
511	4921523L03Rik																																					PCEC1	0.02	0.036	0.00504295	0.000727116	1	PCEC2	0.049	0.028	-0.0210514	0.00544854	1
512	4921524J17Rik																															AVR	0.284	0.344	0.0647146	0.0076636	1	PCEC1	0.266	0.378	0.034497	1.30389e-14	3.87711e-10	PCEC2	0.586	0.309	-0.0293561	9.13238e-32	2.71551e-27
513	4921531C22Rik																																					PCEC1	0.046	0.098	-0.475136	1.37053e-11	4.07527e-07	PCEC2	0.199	0.066	0.368528	6.70126e-28	1.99262e-23
514	4921536K21Rik																																					PCEC1	0.005	0.017	-0.19406	6.04782e-05	1
515	4930402C01Rik
516	4930402H24Rik																			EA	0.445	0.55	-0.593431	7.55268e-07	0.0224579													PCEC1	0.486	0.577	0.228526	0.000209934	1	PCEC2	0.808	0.514	0.0293109	5.70254e-32	1.69565e-27
517	4930403O15Rik																															AVR	0.04	0.021	-0.114327	0.00449915	1
518	4930403P22Rik													GE2	0.025	0.004	0.643504	1.05673e-08	0.000314218																			PCEC1	0.002	0.009	-0.255552	0.0014748	1
519	4930404I05Rik																																					PCEC1	0.046	0.078	-0.326398	1.03774e-05	0.308572	PCEC2	0.139	0.058	0.641051	6.7862e-13	2.01788e-08
520	4930404N11Rik																																					PCEC1	0.018	0.03	0.00633337	0.0089175	1	PCEC2	0.052	0.022	0.0302915	2.63998e-05	0.785
521	4930405A21Rik																																											PCEC2	0.052	0.029	0.05493	0.00330711	1
522	4930415O20Rik
523	4930417O22Rik	AA	0.019	0.004	0.0323402	0.00130589	1																																					PCEC2	0.013	0.003	0.0426049	0.00191157	1
524	4930423C22Rik
525	4930426I24Rik																																											PCEC2	0.024	0.005	0.061553	2.6061e-06	0.0774924
526	4930426L09Rik
527	4930427A07Rik	AA	0.33	0.225	-0.200875	0.000893846	1																									AVR	0.181	0.235	-0.413558	0.00357274	1	PCEC1	0.167	0.264	-0.5187	1.50045e-15	4.46158e-11	PCEC2	0.365	0.214	-0.0815934	6.53333e-17	1.94269e-12
528	4930429F24Rik																																											PCEC2	0.054	0.024	0.234969	5.40777e-05	1
529	4930429P21Rik
530	4930430E12Rik																																					PCEC1	0.034	0.059	-0.0787655	3.58116e-05	1
531	4930430F08Rik	AA	0.14	0.076	0.392659	0.000580738	1	GE1	0.043	0.082	-0.218385	0.00278463	1																									PCEC1	0.048	0.096	-0.191759	3.17967e-10	9.45476e-06	PCEC2	0.199	0.065	0.286221	3.32523e-28	9.88756e-24
532	4930432B10Rik
533	4930432K21Rik																																					PCEC1	0.018	0.034	0.0469754	0.000632517	1	PCEC2	0.083	0.022	0.748619	1.52614e-16	4.53798e-12
534	4930432L08Rik																																					PCEC1	0.004	0.011	-0.0150118	0.00342499	1
535	4930435C17Rik
536	4930439D14Rik
537	4930442L01Rik
538	4930443O20Rik																																					PCEC1	0.007	0.016	0.0773105	0.00285054	1	PCEC2	0.033	0.01	0.348581	6.9026e-06	0.205249
539	4930444A19Rik	AA	0.047	0.103	-1.20042	0.00458704	1	GE1	0.211	0.09	0.956003	3.54997e-18	1.05558e-13	GE2	0.257	0.083	0.893089	3.93576e-39	1.1703e-34	EA	0.061	0.104	-0.899615	0.00703164	1	DVR	0.05	0.105	-0.728043	0.000560102	1	AVR	0.064	0.105	-0.314202	0.0016093	1	PCEC1	0.062	0.124	-0.252323	5.36505e-13	1.5953e-08
540	4930444P10Rik													GE2	0.101	0.068	0.300794	0.00529332	1																			PCEC1	0.045	0.086	-0.110521	1.21761e-08	0.000362057	PCEC2	0.116	0.066	0.109236	7.47317e-06	0.222215
541	4930445N08Rik
542	4930447M23Rik																																											PCEC2	0.007	0.002	0.0882021	0.00764842	1
543	4930448E22Rik																																											PCEC2	0.042	0.014	0.336298	3.07486e-06	0.091431
544	4930448I06Rik
545	4930448N21Rik							GE1	0.021	0.061	-1.09952	0.00020294	1	GE2	0.023	0.062	-1.14574	0.000197335	1																									PCEC2	0.089	0.054	0.0151761	0.00134418	1
546	4930451E10Rik													GE2	0.117	0.156	-0.277595	0.00960857	1																			PCEC1	0.127	0.166	-0.0503982	0.000234094	1	PCEC2	0.204	0.146	0.34599	0.000282445	1
547	4930451G09Rik																																											PCEC2	0.027	0.01	0.0807088	0.000234773	1
548	4930452B06Rik							GE1	0.012	0.036	-1.12524	0.00643742	1	GE2	0.013	0.036	-1.13026	0.00342949	1							DVR	0.067	0.031	1.37184	0.000196552	1							PCEC1	0.025	0.039	-0.201081	0.00574312	1	PCEC2	0.098	0.026	0.358393	1.59657e-18	4.74741e-14
549	4930452N14Rik
550	4930453N24Rik																															AVR	0.224	0.284	-0.162196	0.00287382	1	PCEC1	0.218	0.312	0.056537	1.12311e-11	3.33956e-07	PCEC2	0.519	0.25	0.314688	2.53848e-37	7.54816e-33
551	4930455G09Rik	AA	0.005	0	0.108136	0.00881994	1
552	4930455H04Rik							GE1	0.516	0.41	0.328776	3.32814e-07	0.00989622	GE2	0.544	0.405	0.235826	2.90733e-10	8.64493e-06	EA	0.535	0.411	0.546067	2.4191e-11	7.1932e-07													PCEC1	0.342	0.464	-0.263024	9.91369e-20	2.94784e-15
553	4930461G14Rik
554	4930465K10Rik
555	4930467K11Rik																			EA	0.009	0.001	0.0550396	0.000275675	1
556	4930469G21Rik																			EA	0.006	0.001	0.00480431	0.00639051	1
557	4930469K13Rik
558	4930470G03Rik																																					PCEC1	0.117	0.154	0.135955	0.000308753	1	PCEC2	0.226	0.131	0.0237465	7.2574e-09	0.000215799
559	4930471M09Rik
560	4930473A02Rik																																					PCEC1	0.225	0.289	0.143217	2.40861e-05	0.716199	PCEC2	0.373	0.254	-0.00216836	2.50629e-07	0.00745244
561	4930474H06Rik													GE2	0.029	0.014	0.30283	0.00692225	1																			PCEC1	0.008	0.02	-0.175746	0.000848497	1	PCEC2	0.033	0.013	0.00555754	0.00059213	1
562	4930481A15Rik							GE1	0.294	0.195	0.53446	2.70826e-08	0.0008053	GE2	0.293	0.194	0.499538	1.08277e-08	0.000321963													AVR	0.16	0.209	-0.282573	0.00581546	1	PCEC1	0.159	0.23	-0.449361	2.38332e-10	7.0868e-06	PCEC2	0.284	0.195	0.393699	1.04667e-06	0.0311229
563	4930483J18Rik																																											PCEC2	0.009	0.001	0.267517	6.10185e-06	0.181439
564	4930483K19Rik																									DVR	0.025	0.008	0.319667	0.00128105	1
565	4930486L24Rik																									DVR	0.106	0.066	0.857411	0.00218547	1							PCEC1	0.044	0.082	-0.494132	1.19324e-07	0.0035481	PCEC2	0.136	0.061	0.0843869	6.61934e-11	1.96826e-06
566	4930503L19Rik																																					PCEC1	0.165	0.238	-0.146243	8.98979e-10	2.67311e-05	PCEC2	0.414	0.189	-0.168552	1.12373e-30	3.34142e-26
567	4930505A04Rik																			EA	0.006	0.001	0.0407929	0.00640244	1
568	4930505N22Rik																			EA	0.067	0.038	0.183339	0.00699573	1
569	4930506C21Rik																									DVR	0.454	0.365	0.0435688	0.00236072	1							PCEC1	0.298	0.413	-0.0233673	4.32569e-13	1.28624e-08	PCEC2	0.561	0.35	0.185802	1.40222e-16	4.16952e-12
570	4930507D05Rik																																					PCEC1	0.029	0.06	-0.403082	1.7263e-07	0.00513314	PCEC2	0.094	0.044	0.127136	4.19634e-07	0.0124778
571	4930507D10Rik
572	4930509G22Rik																									DVR	0.086	0.042	0.108893	7.13213e-05	1
573	4930511M06Rik							GE1	0.05	0.085	-0.247744	0.00676715	1																									PCEC1	0.067	0.09	0.265221	0.0047325	1	PCEC2	0.137	0.075	0.53604	5.48801e-07	0.0163186
574	4930512B01Rik													GE2	0.147	0.106	0.0469415	0.00401973	1																			PCEC1	0.085	0.124	-0.116099	2.22546e-05	0.661741	PCEC2	0.163	0.104	0.171203	6.39924e-05	1
575	4930512H18Rik																																											PCEC2	0.033	0.011	0.538046	3.55889e-05	1
576	4930512M02Rik													GE2	0.057	0.033	0.118672	0.00301106	1													AVR	0.072	0.031	0.116418	4.16158e-07	0.0123745	PCEC1	0.021	0.044	-0.088596	5.79804e-06	0.172405
577	4930515G01Rik																																					PCEC1	0.023	0.035	0.180946	0.00975216	1	PCEC2	0.061	0.027	0.300697	8.87941e-06	0.264029
578	4930516B21Rik																																					PCEC1	0.008	0.016	0.0575708	0.00924133	1	PCEC2	0.027	0.012	-0.174465	0.00316836	1
579	4930517L18Rik	AA	0.005	0	0.0980674	0.000805068	1
580	4930517O19Rik
581	4930518I15Rik
582	4930519A11Rik																																											PCEC2	0.004	0	0.00478615	0.00817153	1
583	4930519F16Rik
584	4930519P11Rik							GE1	0.027	0.012	0.304714	0.00554554	1																															PCEC2	0.029	0.011	0.111993	0.000610482	1
585	4930520O04Rik																																					PCEC1	0.059	0.088	-0.109362	0.000105533	1	PCEC2	0.114	0.073	0.147151	0.000401953	1
586	4930521E06Rik																									DVR	0.011	0.003	0.0231743	0.00730796	1
587	4930522L14Rik	AA	0.251	0.167	-0.118273	0.00133962	1																															PCEC1	0.132	0.193	-0.062504	2.04753e-08	0.000608833	PCEC2	0.257	0.161	0.626371	1.08946e-08	0.00032395
588	4930523C07Rik													GE2	0.566	0.485	0.0269724	0.00111509	1							DVR	0.387	0.5	-0.847259	3.67068e-07	0.0109148	AVR	0.394	0.505	-0.158266	9.19108e-09	0.000273297	PCEC1	0.45	0.517	0.234997	0.00154518	1	PCEC2	0.705	0.469	-0.00783213	6.16938e-21	1.83447e-16
589	4930524J08Rik																																											PCEC2	0.031	0.008	0.174517	4.61161e-07	0.0137126
590	4930524O07Rik	AA	0.526	0.397	0.317415	6.71668e-05	1																															PCEC1	0.345	0.436	-0.124094	3.45158e-08	0.00102633	PCEC2	0.544	0.386	0.30862	4.28227e-09	0.000127333
591	4930526A20Rik
592	4930527E20Rik																									DVR	0.011	0.002	0.086543	0.00165063	1
593	4930528P14Rik																									DVR	0.019	0.005	0.118977	0.000314083	1							PCEC1	0.002	0.008	-0.120039	0.00185953	1
594	4930529C04Rik
595	4930533D04Rik																																					PCEC1	0.001	0.006	-0.0105993	0.0018066	1	PCEC2	0.011	0.003	0.0166541	0.00747305	1
596	4930533I22Rik																																					PCEC1	0.052	0.073	-0.0435722	0.00275443	1
597	4930533K18Rik							GE1	0.01	0.003	-0.126012	0.00727647	1
598	4930535I16Rik																																											PCEC2	0.063	0.036	0.218218	0.00210127	1
599	4930538E20Rik
600	4930538K18Rik																																											PCEC2	0.031	0.01	0.0548905	1.18183e-05	0.351418
601	4930539E08Rik																																					PCEC1	0.029	0.043	-0.0162145	0.00989669	1
602	4930539J05Rik																																					PCEC1	0.154	0.229	-0.149642	1.17031e-09	3.4799e-05	PCEC2	0.295	0.191	0.307567	2.26241e-07	0.00672728
603	4930540E01Rik																																											PCEC2	0.009	0.001	0.100665	6.11354e-06	0.181786
604	4930540M05Rik																																					PCEC1	0.001	0.008	-0.151706	0.000153598	1
605	4930544G11Rik													GE2	0.004	0	0.0118282	0.0084828	1							DVR	0.006	0	0.0145359	0.000455548	1
606	4930544I03Rik	AA	0.037	0.014	0.144734	0.00608547	1
607	4930547M16Rik
608	4930548H24Rik																																					PCEC1	0.027	0.046	-0.0512326	0.00033533	1
609	4930550C14Rik																									DVR	0.025	0.009	0.461384	0.00248574	1							PCEC1	0.005	0.013	-0.206164	0.00232191	1	PCEC2	0.024	0.008	0.0898596	0.00068675	1
610	4930551L18Rik																																											PCEC2	0.022	0.007	0.165271	0.000156772	1
611	4930552P12Rik																																											PCEC2	0.009	0.002	0.0420496	0.000700061	1
612	4930554G24Rik
613	4930555F03Rik
614	4930556J24Rik																																					PCEC1	0.115	0.152	0.0192951	0.00043181	1
615	4930556M19Rik.1																																					PCEC1	0.067	0.09	-0.248516	0.00328784	1	PCEC2	0.112	0.078	-0.357964	0.00717163	1
616	4930558J18Rik
617	4930558J22Rik																									DVR	0.064	0.03	-0.0478937	0.000380022	1
618	4930562C15Rik																															AVR	0.029	0.012	-0.0750697	0.00110408	1	PCEC1	0.009	0.017	-0.0321287	0.00820298	1
619	4930562F07Rik							GE1	0.352	0.287	0.275945	0.00110258	1	GE2	0.366	0.284	0.0456133	0.000133674	1							DVR	0.206	0.299	-0.853972	3.07864e-05	0.915433	AVR	0.205	0.303	-0.210285	1.18421e-06	0.0352125	PCEC1	0.257	0.313	0.162491	0.00150653	1	PCEC2	0.414	0.279	0.0670537	1.9046e-08	0.000566332
620	4930563E18Rik
621	4930563E22Rik													GE2	0.097	0.058	0.516855	0.000269792	1																			PCEC1	0.038	0.076	-0.281896	1.70921e-08	0.000508233	PCEC2	0.128	0.055	-0.17816	1.94545e-11	5.7848e-07
622	4930563I02Rik
623	4930566F21Rik																																					PCEC1	0.111	0.138	-0.0198531	0.00922545	1
624	4930568A12Rik													GE2	0.004	0	0.0521656	0.00122795	1
625	4930568G15Rik
626	4930577N17Rik																																					PCEC1	0.099	0.127	0.0420773	0.00341499	1	PCEC2	0.172	0.111	0.137924	7.88724e-05	1
627	4930578C19Rik							GE1	0.164	0.284	-2.0109	2.12904e-10	6.33071e-06	GE2	0.174	0.285	-2.44109	1.7094e-11	5.08289e-07	EA	0.395	0.266	0.921841	1.80558e-10	5.3689e-06	DVR	0.214	0.278	-0.67262	0.00224036	1													PCEC2	0.483	0.25	0.0167476	1.10437e-29	3.28383e-25
628	4930578G10Rik
629	4930578M01Rik																																					PCEC1	0.005	0.014	-0.125841	0.00140672	1	PCEC2	0.024	0.009	0.178754	0.00112599	1
630	4930579G18Rik													GE2	0.09	0.044	0.22358	2.87378e-06	0.0854517
631	4930579G24Rik							GE1	0.041	0.078	-0.788997	0.00332648	1																									PCEC1	0.051	0.088	0.0928397	5.15217e-07	0.01532	PCEC2	0.128	0.068	-0.242074	3.88958e-07	0.0115657
632	4930579H20Rik																			EA	0.006	0.001	0.00641946	0.0063786	1
633	4930579K19Rik																																											PCEC2	0.029	0.012	-0.0144137	0.000804418	1
634	4930581F22Rik																															AVR	0.389	0.456	-0.0492502	0.00472072	1							PCEC2	0.617	0.43	0.201931	2.10755e-09	6.26679e-05
635	4930583K01Rik																															AVR	0.002	0	0.0230213	0.00375008	1
636	4930590J08Rik													GE2	0.002	0	0.010375	0.00300224	1
637	4930593A02Rik																									DVR	0.003	0	0.0290537	0.00016311	1
638	4930594C11Rik.1
639	4930594M22Rik																									DVR	0.086	0.044	0.554224	0.000261956	1
640	4930595D18Rik													GE2	0.007	0.002	0.124587	0.00797553	1
641	4930597O21Rik																									DVR	0.262	0.175	0.196527	6.30508e-05	1	AVR	0.238	0.174	0.277501	0.000101484	1	PCEC1	0.144	0.201	-0.117793	7.00586e-07	0.0208319	PCEC2	0.246	0.173	0.289655	4.83326e-05	1
642	4930599N23Rik																															AVR	0.138	0.105	0.364534	0.00992445	1							PCEC2	0.19	0.1	0.354451	3.34982e-10	9.96068e-06
643	4931403E22Rik																									DVR	0.109	0.046	0.48462	1.59993e-07	0.0047574							PCEC1	0.038	0.058	-0.0991636	0.00102599	1
644	4931403G20Rik													GE2	0.144	0.096	0.142343	0.000383764	1																			PCEC1	0.079	0.113	-0.000148064	7.08242e-05	1
645	4931406B18Rik													GE2	0.031	0.01	0.0488315	3.48644e-05	1																			PCEC1	0.006	0.016	-0.0212606	0.00146347	1
646	4931406C07Rik							GE1	0.145	0.197	-0.284225	0.00550497	1																									PCEC1	0.145	0.22	-0.0522621	1.11256e-10	3.30818e-06	PCEC2	0.286	0.182	0.179854	1.50524e-08	0.000447582
647	4931406P16Rik													GE2	0.824	0.768	0.310382	1.26473e-06	0.0376067							DVR	0.747	0.776	-0.455884	3.54632e-05	1	AVR	0.716	0.781	-0.0492751	0.00332064	1	PCEC1	0.709	0.811	-0.100524	3.62395e-14	1.07758e-09	PCEC2	0.964	0.753	0.148298	4.21726e-19	1.254e-14
648	4931413K12Rik
649	4931415C17Rik																																					PCEC1	0.002	0.009	-0.401091	0.000770866	1	PCEC2	0.022	0.004	0.666766	1.03441e-06	0.0307583
650	4931422A03Rik	AA	0.307	0.209	0.457119	0.000517812	1							GE2	0.253	0.209	0.184869	0.00889805	1																			PCEC1	0.168	0.239	-0.0128742	2.15314e-08	0.000640236	PCEC2	0.289	0.205	-0.204598	0.000333326	1
651	4931423N10Rik																																											PCEC2	0.004	0	-0.000880871	0.00116686	1
652	4931428F04Rik																																					PCEC1	0.084	0.112	0.0241446	0.00142607	1	PCEC2	0.145	0.097	-0.354423	0.00031612	1
653	4931428L18Rik																																											PCEC2	0.024	0.01	0.0526182	0.00436295	1
654	4931429I11Rik
655	4931431C16Rik																																											PCEC2	0.157	0.076	0.318375	3.2859e-10	9.77063e-06
656	4931440P22Rik							GE1	0.07	0.112	-0.668826	0.00328682	1	GE2	0.16	0.103	0.518936	1.93855e-05	0.576427													AVR	0.177	0.101	0.634186	4.90751e-09	0.000145925	PCEC1	0.068	0.132	-0.30379	3.99768e-13	1.18871e-08	PCEC2	0.179	0.101	0.259386	1.19902e-07	0.00356529
657	4932411N23Rik
658	4932412D23Rik
659	4932414J04Rik
660	4932430I15Rik													GE2	0.065	0.034	0.0243284	0.000349894	1
661	4932438A13Rik																			EA	0.445	0.512	-0.657367	0.0034196	1													PCEC1	0.448	0.542	0.124257	1.93483e-08	0.000575322	PCEC2	0.716	0.484	0.0105726	8.60944e-18	2.56002e-13
662	4932442E05Rik													GE2	0.065	0.032	0.550632	7.31341e-05	1													AVR	0.067	0.032	0.81882	1.10099e-05	0.32738	PCEC1	0.019	0.046	-0.412828	2.3034e-07	0.00684915	PCEC2	0.063	0.033	-0.0521126	0.000273437	1
663	4932443L11Rik																																											PCEC2	0.081	0.034	-0.0631938	5.27386e-08	0.00156818
664	4932702P03Rik																																											PCEC2	0.054	0.028	0.0584432	0.000540086	1
665	4933400C23Rik	AA	0.009	0	0.025563	2.26874e-08	0.000674611
666	4933402J07Rik																																											PCEC2	0.009	0.001	0.457518	0.000100246	1
667	4933404K08Rik	AA	0.009	0.002	0.0181815	0.00892673	1
668	4933404O12Rik																																					PCEC1	0.049	0.095	-0.582488	5.47103e-10	1.62681e-05	PCEC2	0.157	0.069	-0.041473	2.6374e-13	7.84231e-09
669	4933405D12Rik																																					PCEC1	0.017	0.034	-0.0908168	0.000288808	1	PCEC2	0.047	0.025	0.145927	0.0031038	1
670	4933406I18Rik	AA	0.009	0.001	0.134989	3.33966e-05	0.993049
671	4933406J10Rik
672	4933406P04Rik																																											PCEC2	0.056	0.023	0.462334	7.5981e-06	0.22593
673	4933407K13Rik																																					PCEC1	0.043	0.069	-0.0506959	0.000135781	1
674	4933408B17Rik
675	4933408J17Rik																																					PCEC1	0.226	0.282	-0.133107	9.05123e-06	0.269138	PCEC2	0.382	0.248	0.30017	1.34664e-10	4.00424e-06
676	4933411E06Rik																																					PCEC1	0.06	0.095	-0.103197	7.16706e-06	0.213112
677	4933412A08Rik																																					PCEC1	0.121	0.174	-0.0599293	1.34994e-06	0.0401404	PCEC2	0.259	0.143	-0.00259388	1.39196e-10	4.13899e-06
678	4933413C19Rik
679	4933413G19Rik																																					PCEC1	0.004	0.01	-0.297823	0.00935841	1
680	4933413J09Rik																																											PCEC2	0.029	0.008	0.164695	2.86734e-06	0.0852604
681	4933413L06Rik	AA	0.019	0.005	0.0428348	0.00468076	1																			DVR	0.017	0.004	0.024036	0.00144358	1
682	4933415A04Rik																																					PCEC1	0.016	0.035	-0.0146081	5.48008e-05	1	PCEC2	0.078	0.022	0.478454	7.32537e-14	2.1782e-09
683	4933416C03Rik																									DVR	0.006	0	0.211532	2.64091e-05	0.785275
684	4933417A18Rik																															AVR	0.005	0	-0.00250994	0.000342362	1
685	4933423P22Rik	AA	0.028	0.003	0.917184	1.73393e-09	5.15585e-05
686	4933424M12Rik
687	4933426K07Rik																									DVR	0.006	0.001	0.145422	0.00253483	1
688	4933427D06Rik													GE2	0.014	0.005	0.0116321	0.00401152	1																			PCEC1	0.002	0.008	-0.0137709	0.00614287	1
689	4933427D14Rik																																					PCEC1	0.071	0.106	-0.0819839	3.02774e-05	0.900298	PCEC2	0.186	0.083	-0.277177	7.71408e-15	2.29378e-10
690	4933427G23Rik																																					PCEC1	0.034	0.054	0.0249024	0.000840488	1
691	4933427J07Rik							GE1	0.043	0.078	-0.249396	0.00647625	1													DVR	0.117	0.072	0.377918	0.00137868	1							PCEC1	0.056	0.086	-0.195163	5.49607e-05	1
692	4933428G20Rik
693	4933429H19Rik							GE1	0.642	0.556	0.395754	1.07144e-06	0.0318593	GE2	0.666	0.552	0.179109	0.000183693	1													AVR	0.52	0.569	-0.289524	0.00209396	1	PCEC1	0.48	0.611	-0.237848	1.27093e-17	3.77911e-13	PCEC2	0.68	0.55	0.222822	9.54996e-08	0.00283968
694	4933431E20Rik																									DVR	0.214	0.143	0.259513	0.000140348	1							PCEC1	0.122	0.163	-0.0994192	0.000184313	1
695	4933431K14Rik																																					PCEC1	0.037	0.059	-0.382761	0.000329274	1
696	4933431K23Rik																																					PCEC1	0.034	0.057	-0.0606395	0.000111241	1
697	4933433C11Rik
698	4933433G15Rik																																											PCEC2	0.014	0.003	0.15006	4.43208e-05	1
699	4933434E20Rik																																					PCEC1	0.533	0.667	0.0727036	1.25066e-14	3.71884e-10	PCEC2	0.906	0.586	0.122069	3.34975e-44	9.96049e-40
700	4933436I20Rik													GE2	0.149	0.09	0.171061	5.89069e-06	0.17516													AVR	0.143	0.09	0.103768	4.74463e-05	1	PCEC1	0.062	0.115	-0.116894	2.49053e-10	7.4056e-06
701	4933438A12Rik
702	4933438K21Rik																															AVR	0.017	0.005	0.689834	0.000222735	1
703	4933439C10Rik																																					PCEC1	0.17	0.233	0.32161	6.62191e-07	0.0196903	PCEC2	0.316	0.198	-0.0779983	1.70295e-09	5.06371e-05
704	4933440M02Rik	AA	0.005	0	0.0165632	0.000808947	1
705	4933440N22Rik																																					PCEC1	0.415	0.525	-0.0303716	1.46381e-08	0.000435263	PCEC2	0.629	0.468	0.174531	4.26524e-07	0.0126827
706	5031415H12Rik																																					PCEC1	0.031	0.048	0.0884563	0.00346435	1	PCEC2	0.076	0.038	0.349151	1.93289e-05	0.574744
707	5031425E22Rik							GE1	0.474	0.547	-0.00751837	0.00232326	1																									PCEC1	0.475	0.578	0.0299515	1.33006e-07	0.00395495	PCEC2	0.785	0.513	0.0329807	3.01728e-20	8.97188e-16
708	5031425F14Rik	AA	0.009	0.002	-0.0749637	0.00897355	1
709	5031434C07Rik																																					PCEC1	0.039	0.065	-0.391562	8.06718e-05	1	PCEC2	0.083	0.052	0.392752	0.00205149	1
710	5031434O11Rik																																											PCEC2	0.101	0.028	0.277623	1.674e-18	4.97765e-14
711	5031439G07Rik							GE1	0.108	0.161	-0.180071	0.00204872	1																									PCEC1	0.128	0.173	0.142462	2.95199e-05	0.877775	PCEC2	0.324	0.138	0.276664	1.39716e-29	4.15446e-25
712	5033430I15Rik																																					PCEC1	0.043	0.061	0.286249	0.00715663	1	PCEC2	0.118	0.047	0.192043	1.10905e-11	3.29776e-07
713	5330406M23Rik																															AVR	0.04	0.02	0.873465	0.00274924	1
714	5330417C22Rik													GE2	0.022	0.002	0.0819146	1.05359e-10	3.13285e-06																			PCEC1	0.001	0.007	-0.0259394	0.000972838	1
715	5330426P16Rik																			EA	0.381	0.462	-0.286958	0.0069473	1													PCEC1	0.412	0.482	0.216091	0.00137987	1	PCEC2	0.655	0.434	-0.0601098	1.25796e-17	3.74056e-13
716	5330438D12Rik																																					PCEC1	0.137	0.168	0.122974	0.00649557	1
717	5330439B14Rik
718	5330439K02Rik
719	5430400D12Rik																																											PCEC2	0.049	0.012	0.114233	7.72749e-11	2.29777e-06
720	5430402O13Rik																																											PCEC2	0.029	0.009	0.375482	1.90819e-05	0.567402
721	5430403G16Rik	AA	0.26	0.183	0.231277	0.00699179	1																									AVR	0.143	0.191	-0.670963	0.00310071	1	PCEC1	0.16	0.201	-0.0158356	0.000576896	1
722	5430405H02Rik													GE2	0.271	0.309	-0.658086	0.00965909	1																			PCEC1	0.247	0.338	0.322278	6.7064e-09	0.000199415	PCEC2	0.553	0.277	-0.0187376	7.07542e-36	2.10388e-31
723	5430416N02Rik							GE1	0.166	0.225	-0.324348	0.00182821	1																									PCEC1	0.158	0.256	-0.196939	1.31951e-15	3.92356e-11	PCEC2	0.304	0.211	-0.0675022	2.24138e-06	0.0666474
724	5430416O09Rik	AA	0.344	0.397	-2.4311	0.00156198	1	GE1	0.308	0.403	-1.38206	5.52579e-07	0.0164309	GE2	0.291	0.407	-2.03571	1.89065e-12	5.62186e-08	EA	0.294	0.402	-1.03869	1.68287e-05	0.5004	DVR	0.546	0.384	1.22399	1.00786e-17	2.99686e-13													PCEC2	0.58	0.374	-0.199892	1.13672e-19	3.38003e-15
725	5430420F09Rik																																											PCEC2	0.016	0.005	-0.0683499	0.00210533	1
726	5530400K19Rik							GE1	0.075	0.131	-0.161404	0.000314359	1													DVR	0.189	0.121	0.125038	0.000230851	1							PCEC1	0.109	0.136	-0.00233106	0.0094812	1
727	5530401A14Rik																																					PCEC1	0.029	0.044	-0.0269444	0.00487293	1
728	5530601H04Rik																																					PCEC1	0.155	0.219	0.337035	9.7153e-08	0.00288884	PCEC2	0.316	0.182	-0.287779	2.27903e-13	6.7767e-09
729	5730403I07Rik																			EA	0.017	0.006	0.0189401	0.00803263	1
730	5730405O15Rik																																					PCEC1	0.035	0.059	0.0214743	0.000137351	1	PCEC2	0.11	0.043	0.388768	7.21916e-12	2.14662e-07
731	5730409E04Rik																																					PCEC1	0.08	0.139	0.149587	1.18617e-10	3.52709e-06	PCEC2	0.282	0.099	0.296053	4.3633e-38	1.29743e-33
732	5730416F02Rik																			EA	0.009	0.002	0.00565066	0.00752871	1
733	5730419F03Rik																									DVR	0.003	0	0.00505388	0.00016311	1
734	5730420D15Rik																																					PCEC1	0.002	0.008	-0.189082	0.00622008	1	PCEC2	0.018	0.004	0.298994	4.2787e-05	1
735	5730455P16Rik																																					PCEC1	0.193	0.297	-0.176955	2.96274e-16	8.80971e-12	PCEC2	0.447	0.238	-0.081722	2.98461e-26	8.87474e-22
736	5730460C07Rik	AA	0.009	0.001	0.0239358	0.000209976	1																			DVR	0.006	0.001	0.00696132	0.00813951	1
737	5730507C01Rik
738	5730508B09Rik																																					PCEC1	0.028	0.065	-0.391161	1.42961e-09	4.25094e-05	PCEC2	0.114	0.044	0.324223	2.9601e-12	8.80186e-08
739	5730585A16Rik													GE2	0.005	0	0.00957132	1.83329e-05	0.545129
740	5730596B20Rik													GE2	0.004	0.019	-0.483135	0.00829821	1
741	5830415F09Rik																																					PCEC1	0.088	0.125	-0.0220878	4.8731e-05	1	PCEC2	0.19	0.102	-0.626881	2.14903e-09	6.39014e-05
742	5830416P10Rik																																											PCEC2	0.052	0.025	0.169629	0.000130907	1
743	5830417I10Rik	AA	0.195	0.103	0.576905	4.99862e-06	0.148634																															PCEC1	0.074	0.125	-0.0803433	8.8685e-09	0.000263705	PCEC2	0.165	0.1	0.0761958	9.52712e-06	0.283289
744	5830418P13Rik																			EA	0.009	0.001	0.350745	6.76176e-05	1
745	5830432E09Rik	AA	0.121	0.07	0.0752922	0.00475099	1	GE1	0.106	0.068	0.126176	0.00200251	1	GE2	0.12	0.066	0.199784	1.96048e-06	0.058295																			PCEC1	0.044	0.087	0.0677303	3.4743e-09	0.000103308	PCEC2	0.101	0.068	-0.226471	0.0067871	1
746	5830444B04Rik																			EA	0.009	0.038	-0.698933	0.00464269	1													PCEC1	0.026	0.042	0.0455336	0.00139126	1	PCEC2	0.061	0.033	-0.000657644	0.000786059	1
747	5830454E08Rik																																											PCEC2	0.051	0.015	0.211448	1.03355e-08	0.000307326
748	5830462I19Rik																																					PCEC1	0.089	0.144	-0.224986	7.54182e-09	0.000224256	PCEC2	0.212	0.114	-0.0283574	4.15515e-10	1.23553e-05
749	5830468F06Rik																																											PCEC2	0.043	0.008	0.711013	1.28041e-13	3.80731e-09
750	5830473C10Rik																																											PCEC2	0.009	0	0.145771	2.71078e-09	8.06052e-05
751	5930403N24Rik																																					PCEC1	0.037	0.018	0.867845	1.37129e-05	0.407754	PCEC2	0.007	0.027	-0.865741	0.00466066	1
752	5930412G12Rik
753	6030407O03Rik													GE2	0.004	0	0.178293	0.00122196	1
754	6030442K20Rik																									DVR	0.123	0.046	0.626752	1.0417e-10	3.09749e-06							PCEC1	0.029	0.063	-0.337335	3.10224e-08	0.000922451
755	6030443J06Rik
756	6030445D17Rik																									DVR	0.159	0.107	0.464707	0.00137869	1							PCEC1	0.078	0.129	0.11787	1.84023e-08	0.000547193	PCEC2	0.201	0.1	0.139383	9.26739e-13	2.75566e-08
757	6030458C11Rik																																					PCEC1	0.168	0.241	-0.122356	4.88926e-09	0.000145382	PCEC2	0.376	0.196	0.0517174	1.71691e-21	5.10523e-17
758	6030460B20Rik																																											PCEC2	0.025	0.012	-0.0307238	0.00717673	1
759	6030468B19Rik													GE2	0.004	0	0.20686	0.00849792	1
760	6230400D17Rik																																					PCEC1	0.09	0.131	-0.0894922	1.50807e-05	0.448425
761	6330403A02Rik													GE2	0.011	0.001	0.158896	1.13534e-06	0.0337593
762	6330403K07Rik																									DVR	0.006	0.001	0.812962	0.008125	1
763	6330403L08Rik
764	6330403N20Rik							GE1	0.128	0.19	-0.210218	0.00025323	1																			AVR	0.293	0.171	0.166426	8.86075e-13	2.63474e-08							PCEC2	0.083	0.195	-0.178765	1.49473e-10	4.44459e-06
765	6330408A02Rik																																					PCEC1	0.044	0.086	-0.161356	3.72347e-09	0.000110717	PCEC2	0.177	0.059	0.297934	2.98444e-24	8.87423e-20
766	6330409D20Rik	AA	0.167	0.437	-1.84495	2.71884e-19	8.08446e-15							GE2	0.526	0.415	0.165341	1.10298e-06	0.0327971	EA	0.201	0.441	-0.934384	9.56151e-20	2.84312e-15	DVR	0.259	0.438	-0.718502	1.25487e-13	3.73137e-09	AVR	0.48	0.42	0.307685	5.60268e-05	1							PCEC2	0.517	0.416	0.0139749	0.00121597	1
767	6330416G13Rik																																					PCEC1	0.036	0.062	0.202378	5.70051e-05	1	PCEC2	0.11	0.046	-0.773111	1.97268e-10	5.86577e-06
768	6330418K02Rik
769	6330549D23Rik																																					PCEC1	0.012	0.024	-0.286386	0.00116001	1
770	6330562C20Rik																									DVR	0.017	0.005	0.0443175	0.00287335	1							PCEC1	0.002	0.007	-0.0890975	0.00822257	1
771	6430511E19Rik													GE2	0.172	0.09	0.21097	5.88146e-10	1.74885e-05																			PCEC1	0.057	0.123	-0.438288	1.11078e-14	3.30291e-10	PCEC2	0.177	0.09	0.404021	2.77425e-10	8.24922e-06
772	6430531B16Rik																			EA	0.003	0	0.00497606	0.000114698	1
773	6430548M08Rik	AA	0.526	0.574	-1.23652	0.00301868	1							GE2	0.634	0.565	0.29613	0.000755728	1																			PCEC1	0.474	0.629	-0.142709	1.18346e-27	3.51903e-23	PCEC2	0.873	0.538	0.125801	7.61628e-56	2.2647e-51
774	6430562O15Rik	AA	0.181	0.109	0.123238	0.000990422	1																															PCEC1	0.087	0.126	0.0580342	2.0074e-05	0.596899	PCEC2	0.221	0.099	0.0348329	1.16008e-16	3.44949e-12
775	6430571L13Rik
776	6430573F11Rik																																											PCEC2	0.047	0.018	-0.709973	9.70472e-06	0.28857
777	6430590A07Rik																			EA	0.015	0.05	-0.552448	0.00301028	1																			PCEC2	0.078	0.044	0.00211184	0.000536345	1
778	6430710C18Rik																																					PCEC1	0.001	0.005	-0.156976	0.00862021	1
779	6530401F13Rik
780	6530402F18Rik																																					PCEC1	0.088	0.146	-0.112693	1.91991e-09	5.70885e-05	PCEC2	0.222	0.113	0.0269882	1.86745e-12	5.55287e-08
781	6530409C15Rik																																					PCEC1	0.069	0.094	0.046237	0.00254017	1
782	6720427I07Rik																																					PCEC1	0.044	0.072	-0.629574	2.5624e-05	0.761929	PCEC2	0.128	0.055	0.434486	2.36844e-11	7.04256e-07
783	6720464F23Rik																																											PCEC2	0.018	0.007	0.692805	0.00409182	1
784	6720483E21Rik																																											PCEC2	0.016	0.004	0.201977	0.000460706	1
785	6720489N17Rik																																					PCEC1	0.087	0.12	-0.0769575	0.00023072	1	PCEC2	0.154	0.103	0.0813831	0.000383628	1
786	6820402A03Rik																			EA	0.006	0	0.0085087	4.87196e-08	0.00144868
787	6820408C15Rik																															AVR	0.005	0	0.029926	5.11699e-07	0.0152154
788	6820431F20Rik													GE2	0.591	0.514	0.0853262	0.00759227	1																			PCEC1	0.462	0.556	-0.0789893	2.70814e-08	0.000805265	PCEC2	0.599	0.513	0.106278	0.00138901	1
789	7530416G11Rik
790	7530428D23Rik																									DVR	0.017	0.005	0.0581362	0.00890585	1
791	8030423F21Rik																																					PCEC1	0.031	0.054	-0.0410694	8.3871e-05	1
792	8030423J24Rik							GE1	0.014	0.002	0.448033	1.60625e-05	0.477618	GE2	0.011	0.003	0.213832	0.00201171	1
793	8030442B05Rik													GE2	0.099	0.033	0.128169	8.50383e-14	2.52861e-09							DVR	0.006	0.043	-0.0774743	0.000582224	1							PCEC1	0.018	0.053	-0.0797934	2.59357e-10	7.71199e-06
794	8030445P17Rik	AA	0.019	0.005	0.0239588	0.00788393	1
795	8030451A03Rik
796	8030462N17Rik																																					PCEC1	0.034	0.051	0.0899617	0.00440773	1
797	8430408G22Rik							GE1	0.712	0.766	-0.105878	0.000386259	1	GE2	0.731	0.765	-0.564812	8.55573e-06	0.254405	EA	0.791	0.759	0.392833	6.44389e-05	1							AVR	0.792	0.758	0.774247	2.06524e-07	0.00614099	PCEC1	0.71	0.79	-0.190503	6.60889e-17	1.96515e-12	PCEC2	0.939	0.741	-0.143169	1.49041e-37	4.43172e-33
798	8430419K02Rik																									DVR	0.064	0.034	0.0482976	0.00370234	1							PCEC1	0.027	0.042	-0.00717665	0.00597709	1	PCEC2	0.06	0.034	0.0501072	0.00202316	1
799	8430419L09Rik																																					PCEC1	0.081	0.154	-0.208126	1.30087e-14	3.86815e-10	PCEC2	0.262	0.112	-0.239313	6.12636e-23	1.82167e-18
800	8430423G03Rik																									DVR	0.011	0.001	0.417832	6.52826e-08	0.00194118
801	8430429K09Rik																																											PCEC2	0.096	0.061	-0.412545	0.00162656	1
802	8430432A02Rik																																											PCEC2	0.02	0.003	0.222995	5.06951e-08	0.00150742
803	9030407P20Rik																																					PCEC1	0.007	0.018	-0.0283475	0.00100637	1	PCEC2	0.029	0.012	0.00263588	0.00160456	1
804	9030612E09Rik
805	9030617O03Rik							GE1	0.095	0.064	0.704163	0.0062975	1																			AVR	0.04	0.07	-0.533773	0.00516291	1							PCEC2	0.103	0.063	-0.50934	0.000356421	1
806	9030619P08Rik							GE1	0.021	0.063	-0.0716	0.000167803	1	GE2	0.025	0.063	-0.0737825	0.000263962	1
807	9030624J02Rik							GE1	0.398	0.471	-0.058931	0.000823074	1																			AVR	0.386	0.474	-0.185407	4.11585e-05	1	PCEC1	0.397	0.503	-0.0747598	1.02615e-11	3.05125e-07	PCEC2	0.725	0.435	0.022511	7.44013e-36	2.21232e-31
808	9130011E15Rik							GE1	0.097	0.148	-0.521654	0.00313438	1																			AVR	0.105	0.148	0.406011	0.00918743	1	PCEC1	0.107	0.165	-0.116786	1.44195e-08	0.000428764	PCEC2	0.273	0.129	0.0398634	7.46263e-19	2.21901e-14
809	9130017K11Rik													GE2	0.05	0.103	-1.56416	3.3108e-05	0.984465																									PCEC2	0.215	0.084	0.277182	6.21561e-23	1.84821e-18
810	9130019O22Rik																															AVR	0.079	0.127	-0.308384	0.000734856	1	PCEC1	0.099	0.135	0.00337399	0.000273482	1	PCEC2	0.226	0.11	0.382686	1.3999e-14	4.16261e-10
811	9130019P16Rik	AA	0.274	0.179	0.587623	0.000231925	1	GE1	0.06	0.195	-1.3218	3.73098e-14	1.10941e-09	GE2	0.074	0.195	-1.3961	1.95579e-13	5.81555e-09	EA	0.238	0.179	0.445628	0.00409354	1	DVR	0.273	0.177	0.188985	3.49699e-06	0.103983	AVR	0.255	0.174	0.447605	2.29972e-07	0.00683822	PCEC1	0.147	0.204	-0.00681456	6.08906e-07	0.0181058	PCEC2	0.277	0.172	-0.0144602	4.7056e-08	0.00139921
812	9130023H24Rik																															AVR	0.062	0.099	0.107954	0.00501107	1							PCEC2	0.157	0.088	-0.651807	4.14609e-07	0.0123284
813	9130208D14Rik	AA	0.2	0.13	0.496773	0.0037372	1	GE1	0.091	0.137	-0.432379	0.00351627	1	GE2	0.19	0.127	0.498493	3.127e-05	0.929813
814	9130213A22Rik
815	9130221H12Rik																																					PCEC1	0.034	0.06	0.0810997	3.13645e-05	0.932623
816	9130230L23Rik							GE1	0.05	0.086	-0.0865134	0.00696102	1																									PCEC1	0.065	0.093	-0.0655613	0.000450328	1	PCEC2	0.119	0.078	0.118364	0.000940642	1
817	9130230N09Rik																																					PCEC1	0.037	0.067	-0.0937252	3.80102e-06	0.113023	PCEC2	0.118	0.049	0.242334	1.02367e-10	3.04389e-06
818	9130401M01Rik																																					PCEC1	0.133	0.183	0.00534089	7.01869e-06	0.208701	PCEC2	0.304	0.149	0.132952	6.86401e-20	2.04101e-15
819	9130409I23Rik																									DVR	0.008	0.002	0.0103634	0.00991054	1
820	9130410C08Rik																															AVR	0.002	0	0.00289275	0.00375008	1
821	9230104M06Rik	AA	0.219	0.126	0.440655	5.32025e-05	1																			DVR	0.181	0.126	0.186625	0.00200647	1							PCEC1	0.103	0.144	0.0915589	5.77072e-05	1	PCEC2	0.177	0.124	-0.032724	0.001329	1
822	9230105E05Rik
823	9230110C19Rik	AA	0.07	0.034	-0.292276	0.00583074	1																															PCEC1	0.024	0.042	-0.296903	0.000771744	1	PCEC2	0.078	0.03	0.793908	8.00915e-09	0.000238152
824	9230114K14Rik																																					PCEC1	0.05	0.103	-0.0747369	2.88519e-11	8.57913e-07	PCEC2	0.175	0.073	0.193228	1.26013e-16	3.74701e-12
825	9230116N13Rik																																					PCEC1	0.051	0.084	0.115225	6.69546e-06	0.19909	PCEC2	0.116	0.067	-0.312239	5.1643e-05	1
826	9330020H09Rik							GE1	0.139	0.201	-0.419436	0.000974235	1	GE2	0.269	0.187	0.516835	7.22445e-07	0.0214819																			PCEC1	0.14	0.227	-0.483176	1.93217e-14	5.7453e-10	PCEC2	0.316	0.182	0.255914	2.40363e-12	7.14718e-08
827	9330104G04Rik																																					PCEC1	0.05	0.08	0.0782419	5.21378e-05	1	PCEC2	0.11	0.064	0.00310733	3.37596e-05	1
828	9330111N05Rik																															AVR	0.017	0.006	-0.0491749	0.00122102	1
829	9330121J05Rik													GE2	0.291	0.212	0.377273	3.42511e-06	0.101846																			PCEC1	0.161	0.254	-0.0780754	2.99395e-14	8.90251e-10	PCEC2	0.439	0.195	0.248165	2.57848e-35	7.6671e-31
830	9330133O14Rik																																					PCEC1	0.091	0.146	-0.244537	8.9237e-09	0.000265346	PCEC2	0.297	0.106	0.336868	4.64484e-37	1.38114e-32
831	9330136K24Rik													GE2	0.142	0.103	-0.118159	0.00896488	1																			PCEC1	0.08	0.122	-0.0117365	3.55015e-06	0.105564	PCEC2	0.165	0.1	0.233376	2.58808e-06	0.0769566
832	9330151L19Rik
833	9330154J02Rik	AA	0.037	0.007	0.810733	1.47724e-06	0.0439257																															PCEC1	0.002	0.012	-0.163268	0.000111624	1
834	9330154K18Rik																																					PCEC1	0.001	0.007	-0.0140383	0.00222674	1
835	9330158H04Rik																																					PCEC1	0.03	0.05	-0.037555	0.000448542	1
836	9330159F19Rik																																					PCEC1	0.022	0.059	-0.0656696	2.41744e-10	7.18825e-06	PCEC2	0.071	0.043	0.0518145	0.00267396	1
837	9330159M07Rik													GE2	0.095	0.065	0.296687	0.00884907	1																			PCEC1	0.051	0.078	0.370148	0.000187933	1
838	9330160F10Rik																																					PCEC1	0.093	0.149	-0.0484513	9.39506e-09	0.000279362	PCEC2	0.204	0.12	-0.148811	2.22019e-07	0.00660174
839	9330171B17Rik																																											PCEC2	0.031	0.013	0.0863341	0.000744934	1
840	9330175E14Rik																									DVR	0.07	0.034	0.797319	0.000471165	1
841	9330179D12Rik													GE2	0.034	0.017	0.144273	0.00538339	1																			PCEC1	0.007	0.026	-0.341692	1.13743e-06	0.0338214	PCEC2	0.04	0.016	-0.0555135	0.000149299	1
842	9430015G10Rik													GE2	0.219	0.171	0.373414	0.00379115	1																			PCEC1	0.114	0.212	-0.341488	1.87865e-19	5.58617e-15	PCEC2	0.311	0.161	0.189428	1.11388e-18	3.31211e-14
843	9430016H08Rik																															AVR	0.291	0.35	-0.0839487	0.00355158	1	PCEC1	0.265	0.389	-0.106532	5.64806e-17	1.67945e-12	PCEC2	0.613	0.314	0.291864	2.43897e-40	7.25229e-36
844	9430020K01Rik	AA	0.963	0.897	0.613748	6.19764e-22	1.84287e-17							GE2	0.95	0.894	0.138383	8.48621e-06	0.252337	EA	0.913	0.898	0.301422	4.54434e-07	0.0135126	DVR	0.947	0.896	0.14369	8.19956e-05	1							PCEC1	0.835	0.937	-0.289953	1.03299e-45	3.07159e-41	PCEC2	0.987	0.889	-0.0819346	3.46332e-07	0.0102982
845	9430021M05Rik							GE1	0.006	0.001	0.00635919	0.00152151	1
846	9430025C20Rik																																					PCEC1	0.049	0.085	-0.0802274	6.22492e-07	0.0185098	PCEC2	0.127	0.066	0.0547179	7.63683e-08	0.00227081
847	9430034N14Rik																																					PCEC1	0.057	0.093	-0.224838	3.94451e-06	0.11729	PCEC2	0.123	0.075	0.288153	2.65997e-05	0.790943
848	9430037G07Rik													GE2	0.048	0.025	0.141152	0.00129514	1																			PCEC1	0.018	0.033	-0.130125	0.00146924	1
849	9430038I01Rik																																					PCEC1	0.114	0.159	0.189249	1.07051e-05	0.318315	PCEC2	0.257	0.13	0.246894	5.19147e-16	1.54368e-11
850	9430053O09Rik																																											PCEC2	0.029	0.008	0.276907	4.29482e-06	0.127706
851	9430060I03Rik																															AVR	0.057	0.09	-0.299206	0.0074795	1	PCEC1	0.063	0.1	-0.0385909	5.49664e-06	0.163443	PCEC2	0.204	0.074	0.309859	8.65053e-24	2.57224e-19
852	9430062P05Rik																																					PCEC1	0.075	0.105	-0.278923	0.0002689	1
853	9430073C21Rik																									DVR	0.008	0	0.0136277	1.41057e-06	0.0419433
854	9430091E24Rik																																					PCEC1	0.019	0.041	0.00847381	1.12534e-05	0.33462	PCEC2	0.099	0.025	0.660706	1.56165e-20	4.64355e-16
855	9430092D12Rik
856	9430097D07Rik																																					PCEC1	0.001	0.006	-0.0783782	0.0024761	1	PCEC2	0.024	0.002	0.379463	3.16516e-15	9.4116e-11
857	9430098F02Rik																																											PCEC2	0.074	0.037	0.170193	3.28167e-05	0.975804
858	9530003J23Rik							GE1	0.004	0	0.00807121	5.5865e-06	0.166115
859	9530018H14Rik
860	9530022L04Rik
861	9530026P05Rik													GE2	0.194	0.246	-0.31215	0.00511406	1																			PCEC1	0.197	0.265	0.120822	6.95704e-07	0.0206867	PCEC2	0.354	0.228	0.0847893	1.52459e-09	4.53336e-05
862	9530027J09Rik																																					PCEC1	0.034	0.072	-0.385764	8.19352e-09	0.000243634	PCEC2	0.101	0.053	0.150341	8.18454e-06	0.243367
863	9530036M11Rik																									DVR	0.006	0.001	0.0226609	0.00255704	1
864	9530046B11Rik																																					PCEC1	0.006	0.014	-0.000375638	0.00542146	1
865	9530051G07Rik																																					PCEC1	0.003	0.008	0.0974693	0.00821448	1	PCEC2	0.033	0.003	0.499462	1.09224e-16	3.24776e-12
866	9530052C20Rik																																					PCEC1	0.005	0.001	0.329878	0.00244427	1
867	9530052E02Rik																									DVR	0.056	0.017	1.14329	2.41337e-07	0.00717616							PCEC1	0.01	0.025	-0.38265	4.54183e-05	1
868	9530053A07Rik
869	9530056K15Rik
870	9530059O14Rik	AA	0.019	0.004	1.73011	0.00182233	1																																					PCEC2	0.02	0.003	-0.111584	1.70837e-08	0.000507983
871	9530068E07Rik																															AVR	0.616	0.716	-0.105512	3.7442e-08	0.00111334	PCEC1	0.644	0.741	0.0243786	1.93267e-10	5.74681e-06	PCEC2	0.949	0.678	0.0368194	6.30367e-43	1.8744e-38
872	9530077C05Rik	AA	0.051	0.019	1.35765	0.000837484	1
873	9530080O11Rik																															AVR	0.002	0	0.0560723	0.00375008	1
874	9530082P21Rik													GE2	0.63	0.701	-0.619297	7.01004e-09	0.000208443	EA	0.602	0.7	-0.578977	2.63244e-08	0.000782756																			PCEC2	0.908	0.669	-0.114959	2.19816e-21	6.53623e-17
875	9630001P10Rik																																											PCEC2	0.047	0.022	0.0879428	0.000223893	1
876	9630010A21Rik																																					PCEC1	0.067	0.121	-0.128956	3.6338e-10	1.08051e-05	PCEC2	0.224	0.088	0.720323	2.34355e-23	6.96854e-19
877	9630013D21Rik
878	9630013K17Rik
879	9630028H03Rik	AA	0.084	0.164	-0.82053	0.000986825	1	GE1	0.224	0.155	0.336135	5.86384e-05	1	GE2	0.242	0.152	0.199771	4.33301e-08	0.00128842	EA	0.23	0.157	0.324952	0.000305462	1													PCEC1	0.127	0.181	-0.0344909	6.32348e-07	0.0188029	PCEC2	0.217	0.155	0.0964417	0.000627204	1
880	9630041A04Rik																															AVR	0.005	0	-0.059423	0.000340972	1
881	9830144P21Rik													GE2	0.241	0.158	0.471144	2.00637e-07	0.00596595	EA	0.215	0.163	0.26399	0.00964491	1													PCEC1	0.103	0.203	-0.334004	1.68343e-20	5.00569e-16	PCEC2	0.248	0.157	0.116111	1.67733e-06	0.0498754
882	9830147E19Rik																																					PCEC1	0.031	0.066	-0.405323	1.90092e-08	0.000565237	PCEC2	0.107	0.047	-0.0134106	3.11751e-09	9.2699e-05
883	9930012K11Rik																															AVR	0.095	0.131	-1.00415	0.0071931	1	PCEC1	0.096	0.145	0.110976	4.32483e-07	0.0128599	PCEC2	0.239	0.115	-0.113772	1.89017e-16	5.62043e-12
884	9930014A18Rik							GE1	0.155	0.214	-1.149	0.000640471	1													DVR	0.114	0.216	-1.52854	7.8792e-07	0.0234288							PCEC1	0.176	0.228	0.324242	0.000149452	1	PCEC2	0.43	0.184	0.0499141	3.37161e-38	1.00255e-33
885	9930021J03Rik																																					PCEC1	0.071	0.093	0.124403	0.00790492	1	PCEC2	0.148	0.078	-0.121489	4.00524e-08	0.00119096
886	9930038B18Rik	AA	0.112	0.028	2.26448	2.70922e-12	8.05587e-08																									AVR	0.012	0.034	-0.996567	0.00432054	1	PCEC1	0.012	0.043	-0.799214	3.25344e-10	9.6741e-06	PCEC2	0.076	0.027	0.0641105	5.00369e-10	1.48785e-05
887	9930104L06Rik																																											PCEC2	0.237	0.136	-0.550632	3.4437e-10	1.02398e-05
888	9930111J21Rik1	AA	0.307	0.181	0.515154	2.34784e-06	0.069813	GE1	0.124	0.192	-0.51365	0.000201747	1	GE2	0.147	0.19	-0.583264	0.00680577	1																									PCEC2	0.302	0.173	0.0978264	4.93687e-12	1.46798e-07
889	9930111J21Rik2							GE1	0.468	0.557	-0.692321	8.90417e-07	0.0264765													DVR	0.616	0.544	0.2345	0.00206347	1							PCEC1	0.487	0.584	-0.0605475	4.35123e-10	1.29384e-05	PCEC2	0.722	0.529	0.27367	5.81644e-14	1.72952e-09
890	a							GE1	0.451	0.38	0.148718	0.0055095	1
891	A130006I12Rik
892	A130010J15Rik	AA	0.233	0.125	-0.648434	2.53488e-06	0.0753746	GE1	0.085	0.134	-0.230967	0.00176224	1																									PCEC1	0.1	0.146	0.0156939	2.12841e-06	0.0632881	PCEC2	0.228	0.119	0.40887	3.40471e-13	1.01239e-08
893	A130014A01Rik																																					PCEC1	0.102	0.128	0.427469	0.00884469	1	PCEC2	0.239	0.105	0.497506	6.04159e-20	1.79647e-15
894	A130048G24Rik							GE1	0.017	0.005	0.171499	0.00331039	1
895	A130050O07Rik
896	A130051J06Rik	AA	0.502	0.362	0.288178	1.26054e-05	0.374823	GE1	0.242	0.38	-0.849525	8.38837e-11	2.49428e-06	GE2	0.242	0.382	-0.799906	3.73945e-12	1.11192e-07	EA	0.459	0.361	0.459441	4.02499e-06	0.119683	DVR	0.524	0.357	0.387475	2.61563e-11	7.77758e-07							PCEC1	0.335	0.386	0.165261	0.00387044	1	PCEC2	0.468	0.356	0.0266635	5.09041e-05	1
897	A130057D12Rik																																											PCEC2	0.112	0.074	0.0238784	0.00341947	1
898	A1cf	AA	0.009	0.001	-0.0460671	0.00474949	1
899	A230004M16Rik	AA	0.177	0.114	0.280648	0.00453178	1	GE1	0.075	0.12	-0.480881	0.00193628	1													DVR	0.167	0.113	0.448747	0.00199339	1							PCEC1	0.094	0.129	-0.156404	0.000108961	1
900	A230005M16Rik																															AVR	0.225	0.288	-0.202235	0.00180167	1	PCEC1	0.22	0.317	0.0686658	1.99992e-11	5.94675e-07	PCEC2	0.553	0.251	0.266822	1.76348e-43	5.24372e-39
901	A230006K03Rik							GE1	0.075	0.113	-0.0880085	0.00844527	1													DVR	0.159	0.106	0.05263	0.00221161	1
902	A230020J21Rik
903	A230046K03Rik																																					PCEC1	0.267	0.383	-0.0510045	4.91368e-16	1.46108e-11	PCEC2	0.586	0.313	0.27206	6.06553e-36	1.80359e-31
904	A230050P20Rik																			EA	0.407	0.489	-0.264369	0.00313229	1							AVR	0.408	0.493	-0.119475	6.26782e-05	1	PCEC1	0.443	0.508	0.218847	0.00155289	1	PCEC2	0.725	0.457	-0.0288997	3.34387e-32	9.943e-28
905	A230052G05Rik							GE1	0.006	0.001	0.109287	0.00960361	1
906	A230056P14Rik																																											PCEC2	0.051	0.018	-0.0944651	9.769e-07	0.0290481
907	A230059L01Rik																																					PCEC1	0.118	0.166	-0.174898	2.81717e-06	0.0837685
908	A230060F14Rik	AA	0.405	0.182	0.513574	2.45723e-16	7.30656e-12	GE1	0.12	0.197	-0.532992	3.04273e-05	0.904756	GE2	0.133	0.197	-0.488278	7.89732e-05	1							DVR	0.543	0.166	1.48495	5.25094e-79	1.56137e-74	AVR	0.133	0.197	-0.342165	0.000339245	1	PCEC1	0.122	0.23	-0.45061	7.4567e-22	2.21725e-17	PCEC2	0.271	0.181	-0.0255384	2.40785e-05	0.715975
909	A230065H16Rik	AA	0.009	0.001	0.171166	0.00216832	1
910	A230065N10Rik	AA	0.065	0.019	0.712453	3.73649e-06	0.111105							GE2	0.004	0.023	-0.661845	0.00239682	1							DVR	0.058	0.018	1.3711	2.21709e-07	0.00659253							PCEC1	0.01	0.028	-0.508677	6.53084e-06	0.194194
911	A230072C01Rik																																					PCEC1	0.125	0.157	0.0776025	0.00196583	1	PCEC2	0.206	0.139	-0.0888892	0.00011742	1
912	A230072E10Rik																																					PCEC1	0.046	0.088	-0.4988	6.76423e-09	0.000201134	PCEC2	0.175	0.061	0.378965	5.98027e-22	1.77823e-17
913	A230077H06Rik																																					PCEC1	0.082	0.106	-0.0026318	0.00836132	1
914	A230083G16Rik																																											PCEC2	0.013	0.004	0.144654	0.00300942	1
915	A230083N12Rik																															AVR	0.182	0.114	0.231668	1.17416e-06	0.0349137	PCEC1	0.076	0.147	-0.163985	1.8755e-14	5.57681e-10	PCEC2	0.23	0.109	0.317492	7.91346e-17	2.35307e-12
916	A230087F16Rik																			EA	0.256	0.368	-0.480427	1.91472e-05	0.569342													PCEC1	0.294	0.4	-0.0550034	2.94054e-12	8.7437e-08	PCEC2	0.62	0.332	0.454115	3.75554e-34	1.11671e-29
917	A230103J11Rik																									DVR	0.184	0.126	0.507589	0.00130052	1							PCEC1	0.106	0.144	-0.0051608	0.000214791	1	PCEC2	0.23	0.119	-0.200965	1.47387e-11	4.38254e-07
918	A230108P19Rik																									DVR	0.011	0.001	0.551354	4.41041e-06	0.131144
919	A330008L17Rik
920	A330009N23Rik																			EA	0.201	0.276	-0.607538	0.00133144	1	DVR	0.195	0.277	-0.621832	0.000438902	1							PCEC1	0.243	0.288	0.399187	0.00605816	1	PCEC2	0.524	0.243	0.0988793	3.92721e-41	1.16776e-36
921	A330015K06Rik																																					PCEC1	0.002	0.009	-0.144084	0.00102334	1	PCEC2	0.024	0.004	0.006477	2.15016e-08	0.000639351
922	A330023F24Rik	AA	0.302	0.18	0.429975	7.23139e-06	0.215025	GE1	0.244	0.179	0.148912	0.000183181	1	GE2	0.239	0.179	0.223152	0.000391575	1																			PCEC1	0.13	0.217	-0.338805	3.16039e-15	9.39741e-11	PCEC2	0.264	0.176	0.393558	3.13329e-06	0.0931683
923	A330032B11Rik																																					PCEC1	0.112	0.179	-0.126625	2.28708e-10	6.80064e-06	PCEC2	0.199	0.15	0.200342	0.00258034	1
924	A330040F15Rik
925	A330041J22Rik	AA	0.042	0.005	0.192994	2.86168e-11	8.50919e-07																			DVR	0.025	0.005	0.417255	4.53208e-06	0.134761
926	A330044P14Rik
927	A330069E16Rik							GE1	0.085	0.132	-0.272497	0.00213217	1													DVR	0.187	0.124	-0.0127732	0.000809047	1							PCEC1	0.096	0.146	0.0203806	1.03383e-07	0.00307411	PCEC2	0.221	0.117	0.219449	2.29834e-12	6.83412e-08
928	A330069K06Rik																									DVR	0.008	0.001	0.0445468	1.73724e-05	0.516567
929	A3galt2
930	A430005L14Rik																															AVR	0.256	0.31	-0.139201	0.00586627	1	PCEC1	0.26	0.33	0.234088	2.46788e-05	0.733825	PCEC2	0.535	0.278	-0.0424881	2.09988e-31	6.24399e-27
931	A430010J10Rik																			EA	0.349	0.285	0.067211	0.00619572	1													PCEC1	0.234	0.321	-0.0667237	6.77185e-10	2.01361e-05	PCEC2	0.344	0.283	0.134073	0.000942993	1
932	A430018G15Rik							GE1	0.012	0.04	-0.894026	0.00208274	1																									PCEC1	0.027	0.044	0.0892719	0.00223367	1	PCEC2	0.092	0.032	0.019442	1.84963e-12	5.49988e-08
933	A430027C01Rik																															AVR	0.105	0.054	-0.0151604	1.23339e-06	0.0366747	PCEC1	0.046	0.068	-0.0150259	0.00101079	1
934	A430027H14Rik	AA	0.005	0	0.00705696	7.80799e-07	0.0232171
935	A430033K04Rik																																					PCEC1	0.089	0.121	0.281903	0.000470786	1	PCEC2	0.212	0.098	0.253986	5.7937e-16	1.72276e-11
936	A430046D13Rik																																					PCEC1	0.037	0.058	0.115783	0.000655781	1	PCEC2	0.094	0.046	0.344762	6.30582e-07	0.0187503
937	A430057M04Rik							GE1	0.116	0.174	-0.228686	0.00149686	1													DVR	0.262	0.163	0.724517	2.34086e-07	0.00696054	AVR	0.119	0.175	-0.23223	0.00075289	1	PCEC1	0.119	0.198	-0.14185	3.30752e-13	9.83493e-09	PCEC2	0.338	0.15	0.179737	1.20037e-27	3.56929e-23
938	A430078G23Rik
939	A430078I02Rik																																											PCEC2	0.213	0.123	0.289161	8.96111e-09	0.000266458
940	A430093F15Rik																									DVR	0.019	0.005	1.46075	0.00043283	1							PCEC1	0.002	0.008	-0.233382	0.00465324	1	PCEC2	0.022	0.004	-0.209301	2.69393e-07	0.00801039
941	A430105I19Rik	AA	0.256	0.16	0.412859	9.55206e-05	1																									AVR	0.102	0.171	-0.524529	1.19324e-05	0.354811	PCEC1	0.114	0.193	-0.575379	4.41093e-14	1.31159e-09	PCEC2	0.293	0.149	-0.00490687	5.30522e-17	1.57751e-12
942	A430105J06Rik
943	A430110C17Rik																																					PCEC1	0.023	0.038	-0.0687072	0.00254004	1
944	A430110L20Rik																																											PCEC2	0.022	0.009	0.214622	0.00748124	1
945	A4galt																									DVR	0.078	0.036	1.74324	4.2414e-05	1							PCEC1	0.019	0.05	-1.02977	8.72809e-09	0.00025953	PCEC2	0.116	0.03	0.371726	4.23547e-23	1.25942e-18
946	A4gnt																															AVR	0.003	0	0.0328177	0.00164047	1
947	A530013C23Rik																																					PCEC1	0.036	0.056	-0.0471711	0.00111745	1	PCEC2	0.078	0.045	0.0965583	0.000742949	1
948	A530017D24Rik
949	A530020G20Rik													GE2	0.002	0	0.00285842	0.00300224	1
950	A530032D15Rik													GE2	0.135	0.076	0.134691	1.59686e-06	0.0474827																			PCEC1	0.064	0.092	-0.0655866	0.000501414	1
951	A530040E14Rik
952	A530053G22Rik																																											PCEC2	0.018	0.007	0.0183405	0.00322928	1
953	A530072M11Rik
954	A530076I17Rik
955	A530083I20Rik
956	A630001G21Rik																									DVR	0.039	0.087	-0.908762	0.00158931	1							PCEC1	0.052	0.102	-0.0782243	2.12933e-10	6.33157e-06	PCEC2	0.213	0.069	-0.177523	1.9984e-30	5.94225e-26
957	A630014C17Rik																																											PCEC2	0.045	0.012	0.431875	4.52005e-09	0.000134404
958	A630031M04Rik																																					PCEC1	0.019	0.032	-0.0366497	0.00581188	1
959	A630033H20Rik																									DVR	0.109	0.176	-1.59585	0.000480712	1													PCEC2	0.246	0.163	-0.381554	1.34751e-06	0.0400682
960	A630035G10Rik
961	A630052C17Rik																																					PCEC1	0.175	0.22	0.337262	0.00085918	1	PCEC2	0.282	0.195	-0.373942	2.21012e-05	0.657181
962	A630072L19Rik
963	A630072M18Rik																															AVR	0.281	0.354	-0.109868	0.00079661	1	PCEC1	0.287	0.381	-0.0867726	7.62377e-11	2.26693e-06	PCEC2	0.622	0.315	0.488358	4.28638e-42	1.27456e-37
964	A630073D07Rik																															AVR	0.053	0.021	0.135688	1.75979e-06	0.0523273	PCEC1	0.016	0.03	-0.0573532	0.00109136	1
965	A630075F10Rik	AA	0.084	0.045	0.0359456	0.00823295	1																															PCEC1	0.029	0.056	-0.0373428	3.56635e-06	0.106045
966	A630076J17Rik													GE2	0.004	0	0.0662477	2.69875e-05	0.802474
967	A630077J23Rik																									DVR	0.036	0.007	0.789742	2.34469e-08	0.000697193
968	A630091E08Rik																			EA	0.017	0.004	0.207882	0.000632654	1													PCEC1	0.001	0.007	-0.0589056	0.00165364	1
969	A730011C13Rik													GE2	0.126	0.09	0.261986	0.00464779	1																			PCEC1	0.072	0.106	-0.0223213	4.40026e-05	1	PCEC2	0.17	0.085	0.193139	7.86009e-10	2.3372e-05
970	A730013G03Rik																																											PCEC2	0.013	0.001	-0.0257597	1.68521e-07	0.00501097
971	A730015C16Rik																			EA	0.238	0.31	-0.613345	0.0011758	1													PCEC1	0.228	0.35	-0.210787	1.17058e-18	3.48072e-14	PCEC2	0.566	0.276	0.344833	3.86109e-40	1.14809e-35
972	A730017L22Rik																																					PCEC1	0.187	0.237	0.214702	0.000103612	1	PCEC2	0.363	0.203	0.501503	3.5701e-19	1.06157e-14
973	A730020E08Rik																																					PCEC1	0.045	0.064	0.0706494	0.00499283	1
974	A730032A03Rik
975	A730049H05Rik																																											PCEC2	0.054	0.031	0.394333	0.00341581	1
976	A730061H03Rik							GE1	0.033	0.063	-0.167572	0.00936612	1																															PCEC2	0.094	0.057	0.0655062	0.000643556	1
977	A730071L15Rik																															AVR	0.286	0.345	-0.345027	0.00237735	1	PCEC1	0.279	0.372	-0.110707	1.44055e-09	4.28347e-05	PCEC2	0.45	0.326	-0.00377778	2.67324e-06	0.0794887
978	A730081D07Rik							GE1	0.209	0.28	-0.499099	0.000257787	1	GE2	0.224	0.279	-0.545582	0.0023135	1	EA	0.34	0.269	0.307152	0.00251112	1	DVR	0.379	0.266	0.512764	3.13086e-07	0.00930962							PCEC1	0.222	0.303	0.112747	6.99325e-08	0.00207944	PCEC2	0.47	0.251	0.153411	8.91154e-22	2.64985e-17
979	A730085K08Rik																																					PCEC1	0.083	0.138	-0.217346	3.40098e-09	0.000101128	PCEC2	0.203	0.108	0.21101	5.68238e-10	1.68966e-05
980	A730089K16Rik
981	A730090H04Rik																																											PCEC2	0.004	0	0.0100572	2.50474e-05	0.744783
982	A730090N16Rik
983	A830005F24Rik																									DVR	0.008	0.001	0.279346	0.000105605	1
984	A830008E24Rik
985	A830009L08Rik	AA	0.009	0.001	0.59545	0.00215387	1
986	A830010M20Rik																																											PCEC2	0.054	0.029	0.60245	0.00151236	1
987	A830011K09Rik
988	A830019P07Rik							GE1	0.068	0.028	1.3586	8.79601e-07	0.0261549	GE2	0.074	0.027	1.4693	1.67699e-09	4.98652e-05																			PCEC1	0.013	0.043	-1.21141	5.35178e-10	1.59135e-05	PCEC2	0.083	0.026	0.0758525	7.41931e-13	2.20613e-08
989	A830036E02Rik																																					PCEC1	0.018	0.03	-0.0185766	0.00640818	1
990	A830052D11Rik
991	A830073O21Rik	AA	0.051	0.152	-1.39561	2.9363e-05	0.87311													EA	0.044	0.155	-1.82203	7.77046e-09	0.000231055	DVR	0.045	0.155	-1.84681	3.76936e-09	0.000112082													PCEC2	0.28	0.133	0.0730269	9.82331e-18	2.92096e-13
992	A830080D01Rik	AA	0.186	0.126	0.533436	0.00621427	1																															PCEC1	0.084	0.154	-0.036005	2.19849e-13	6.5372e-09	PCEC2	0.32	0.106	0.42047	1.56929e-45	4.66628e-41
993	A830082K12Rik							GE1	0.079	0.142	-0.406741	8.9552e-05	1																									PCEC1	0.104	0.156	-0.149989	1.59403e-07	0.00473986	PCEC2	0.23	0.126	0.30982	6.23099e-12	1.85279e-07
994	A830092H15Rik
995	A930001C03Rik							GE1	0.048	0.025	0.396363	0.0034653	1
996	A930002H24Rik																																											PCEC2	0.061	0.03	0.0428442	0.000118262	1
997	A930003A15Rik
998	A930004D18Rik							GE1	0.062	0.1	-0.50696	0.00576133	1																									PCEC1	0.071	0.111	0.0533964	3.89803e-06	0.115908	PCEC2	0.19	0.086	0.113922	1.1157e-14	3.31753e-10
999	A930004J17Rik																																					PCEC1	0.022	0.041	-0.280851	0.000243062	1
1000	A930005H10Rik																																					PCEC1	0.136	0.192	0.0547971	6.60523e-07	0.0196407	PCEC2	0.32	0.155	0.152875	1.33628e-20	3.97342e-16
1001	A930005N03Rik	AA	0.074	0.019	0.736292	1.66264e-08	0.000494385																			DVR	0.1	0.015	1.23237	1.2625e-27	3.75406e-23							PCEC1	0.008	0.028	-0.342039	4.87805e-07	0.0145049
1002	A930006K02Rik																			EA	0.064	0.108	-1.03187	0.00556237	1													PCEC1	0.089	0.115	0.297543	0.00786391	1	PCEC2	0.235	0.091	0.182164	1.783e-24	5.30174e-20
1003	A930006L05Rik																																											PCEC2	0.033	0.008	0.153209	6.99587e-08	0.00208022
1004	A930012L18Rik																																					PCEC1	0.091	0.122	0.131193	0.0010905	1	PCEC2	0.168	0.104	4.69636e-05	1.83844e-05	0.54666
1005	A930012O16Rik																																					PCEC1	0.079	0.114	-0.00417459	5.89959e-05	1	PCEC2	0.17	0.094	-0.298102	9.44043e-08	0.00280711
1006	A930015D03Rik							GE1	0.178	0.285	-0.501396	1.9549e-07	0.00581289	GE2	0.196	0.284	-0.132247	1.851e-06	0.0550395																			PCEC1	0.306	0.258	0.241542	4.6117e-06	0.137129	PCEC2	0.345	0.268	0.169306	0.000143483	1
1007	A930017K11Rik	AA	0.014	0.001	-0.0797629	2.24706e-05	0.668163
1008	A930024N18Rik							GE1	0.133	0.188	-0.370238	0.00202769	1																									PCEC1	0.141	0.208	-0.239283	4.59294e-09	0.000136571	PCEC2	0.304	0.17	0.256839	2.41065e-12	7.16807e-08
1009	A930029G22Rik																															AVR	0.009	0.031	-0.552268	0.00261446	1
1010	A930038B10Rik
1011	AA413626																									DVR	0.017	0.003	0.546817	4.49424e-05	1
1012	AA414768																																											PCEC2	0.045	0.022	0.099032	0.000752417	1
1013	AA415398																																					PCEC1	0.023	0.038	-0.0782611	0.00288298	1	PCEC2	0.076	0.028	-0.0366478	1.3594e-09	4.04219e-05
1014	AA465934	AA	0.991	0.992	-0.166954	0.00740311	1																			DVR	0.992	0.992	-0.142477	0.00488598	1	AVR	0.993	0.992	-0.0866727	3.07315e-05	0.913801	PCEC1	0.992	0.992	0.0608036	3.64908e-13	1.08505e-08
1015	AA467197																															AVR	0.04	0.019	1.10378	0.000877327	1	PCEC1	0.013	0.026	-0.186968	0.00142833	1	PCEC2	0.043	0.019	-0.225284	0.000161402	1
1016	AA474331																																											PCEC2	0.081	0.038	-0.406036	2.73007e-06	0.0811786
1017	AA474408							GE1	0.812	0.796	0.365939	0.000860553	1	GE2	0.752	0.803	-0.459448	7.60655e-10	2.26181e-05													AVR	0.756	0.803	-0.217854	3.65544e-08	0.00108695	PCEC1	0.789	0.802	0.0653065	0.00195506	1
1018	AA543186																																					PCEC1	0.01	0.02	0.123561	0.0071625	1
1019	AA792892
1020	AA986860																																					PCEC1	0.033	0.049	-0.135983	0.00474773	1	PCEC2	0.076	0.04	-0.832836	0.000103488	1
1021	Aaas																															AVR	0.12	0.167	-0.107406	0.003091	1	PCEC1	0.127	0.183	0.109101	2.01268e-07	0.0059847	PCEC2	0.344	0.142	-0.304514	2.26418e-32	6.73255e-28
1022	Aacs																															AVR	0.165	0.231	-0.242353	0.000266551	1	PCEC1	0.196	0.24	0.334277	0.000658961	1	PCEC2	0.412	0.202	-0.199418	7.96004e-28	2.36692e-23
1023	Aaed1	AA	0.474	0.321	0.676862	3.9284e-08	0.00116811							GE2	0.377	0.321	0.198805	0.00715667	1													AVR	0.27	0.334	-0.0468886	0.00615222	1	PCEC1	0.248	0.372	-0.108514	1.41115e-16	4.19605e-12	PCEC2	0.564	0.3	-0.0404673	3.32996e-25	9.90163e-21
1024	Aagab																																					PCEC1	0.259	0.345	-0.0279687	7.92219e-10	2.35566e-05	PCEC2	0.512	0.292	-0.107352	9.96474e-26	2.96302e-21
1025	Aak1																															AVR	0.105	0.147	-0.0233679	0.00491163	1	PCEC1	0.105	0.164	-0.0846796	4.24978e-09	0.000126367	PCEC2	0.293	0.125	0.183375	7.28915e-26	2.16743e-21
1026	Aamdc																															AVR	0.181	0.249	-0.462191	0.000208205	1	PCEC1	0.195	0.268	0.11384	4.30699e-08	0.00128068	PCEC2	0.43	0.22	0.172897	2.68256e-24	7.9766e-20
1027	Aamp																			EA	0.779	0.826	-0.315847	0.000268451	1	DVR	0.791	0.826	-0.287837	0.00857516	1	AVR	0.738	0.834	-0.133208	7.46074e-07	0.0221845							PCEC2	0.973	0.807	-0.00919511	1.35436e-22	4.0272e-18
1028	Aanat																																											PCEC2	0.007	0.001	0.0137847	0.00388701	1
1029	Aar2							GE1	0.402	0.477	-0.0271713	0.00141611	1																			AVR	0.389	0.48	-0.0512124	2.51816e-05	0.748776	PCEC1	0.426	0.496	0.19081	0.00011188	1	PCEC2	0.729	0.441	-0.276375	3.55292e-32	1.05646e-27
1030	Aars																			EA	0.451	0.518	-0.318603	0.00609104	1							AVR	0.465	0.52	-0.0427108	0.00305724	1	PCEC1	0.424	0.566	-0.054894	3.14014e-23	9.33721e-19	PCEC2	0.823	0.479	0.0349089	5.40202e-54	1.60629e-49
1031	Aars2																															AVR	0.057	0.089	-0.572914	0.00908383	1	PCEC1	0.067	0.096	-0.00675401	0.000257648	1	PCEC2	0.132	0.08	-0.658925	6.49171e-05	1
1032	Aarsd1																																					PCEC1	0.286	0.342	0.294905	0.0014469	1	PCEC2	0.488	0.303	-0.127588	7.31582e-16	2.17536e-11
1033	Aasdh																																					PCEC1	0.077	0.133	0.048779	1.01062e-09	3.00507e-05	PCEC2	0.231	0.099	-0.297248	4.58065e-20	1.36206e-15
1034	Aasdhppt																															AVR	0.219	0.279	-0.0191531	0.00251992	1	PCEC1	0.209	0.31	0.0783324	1.50327e-13	4.46998e-09	PCEC2	0.537	0.243	-0.0176233	4.13999e-44	1.23102e-39
1035	Aass																									DVR	0.031	0.013	-0.117691	0.00835126	1
1036	Aatf																																					PCEC1	0.169	0.259	-0.210751	2.18979e-13	6.51134e-09	PCEC2	0.494	0.196	0.182425	2.71909e-52	8.08523e-48
1037	Aatk																															AVR	0.157	0.211	-0.511362	0.00197537	1	PCEC1	0.161	0.23	0.0609245	2.65846e-09	7.90492e-05	PCEC2	0.441	0.178	0.456912	3.72997e-47	1.10911e-42
1038	AB041806
1039	AB124611																																					PCEC1	0.003	0.012	-0.242349	0.000163939	1
1040	Abat																																					PCEC1	0.035	0.052	0.453402	0.00507766	1	PCEC2	0.116	0.038	0.0911715	1.18446e-16	3.52198e-12
1041	Abca1							GE1	0.226	0.274	-1.05636	0.00459883	1	GE2	0.21	0.277	-1.04097	1.41123e-05	0.41963							DVR	0.404	0.261	0.853641	4.27725e-12	1.27184e-07							PCEC1	0.207	0.306	-0.0149526	1.04416e-13	3.10481e-09	PCEC2	0.421	0.253	-0.24571	2.45721e-14	7.30651e-10
1042	Abca12																																					PCEC1	0.02	0.042	-0.0180363	2.69482e-05	0.801304
1043	Abca16	AA	0.014	0.001	0.691164	2.18818e-05	0.650654																																					PCEC2	0.013	0.001	-0.0107168	3.34467e-10	9.94537e-06
1044	Abca2							GE1	0.054	0.091	-0.15906	0.00682203	1																			AVR	0.048	0.093	-1.00303	0.000284392	1	PCEC1	0.058	0.106	-0.273259	2.65996e-09	7.90938e-05	PCEC2	0.19	0.077	0.855908	2.70581e-19	8.04572e-15
1045	Abca3	AA	0.535	0.414	0.225789	0.000331808	1																															PCEC1	0.332	0.469	0.0350735	4.99105e-19	1.48409e-14	PCEC2	0.649	0.393	-0.0070396	7.45326e-25	2.21623e-20
1046	Abca4																									DVR	0.047	0.021	1.28302	0.00126371	1							PCEC1	0.015	0.028	-0.483189	0.00174351	1	PCEC2	0.058	0.019	0.067694	7.29446e-09	0.000216901
1047	Abca5																									DVR	0.117	0.045	1.41116	2.65599e-10	7.8976e-06	AVR	0.028	0.052	-1.01409	0.00901729	1	PCEC1	0.026	0.063	-0.276172	9.0323e-10	2.68576e-05	PCEC2	0.096	0.044	-0.690711	1.84202e-07	0.00547724
1048	Abca7							GE1	0.366	0.309	0.67085	0.000987893	1	GE2	0.377	0.307	0.520638	0.000152819	1													AVR	0.246	0.322	-0.0588252	0.00016959	1	PCEC1	0.247	0.353	-0.127361	2.03942e-13	6.06423e-09	PCEC2	0.539	0.289	-0.0762743	4.24163e-29	1.26125e-24
1049	Abca9
1050	Abcb10																															AVR	0.117	0.163	0.0513563	0.00650285	1	PCEC1	0.111	0.185	-0.288362	1.93681e-12	5.75911e-08	PCEC2	0.325	0.139	0.281026	7.15126e-28	2.12643e-23
1051	Abcb1a							GE1	0.002	0.021	-0.663351	0.00359039	1							EA	0.044	0.018	0.993733	0.000787818	1	DVR	0.067	0.016	1.00037	1.65422e-11	4.91881e-07							PCEC1	0.007	0.027	-0.654908	1.20323e-07	0.00357779	PCEC2	0.049	0.016	0.750286	1.79142e-07	0.00532678
1052	Abcb1b																																					PCEC1	0.036	0.058	-0.321862	0.000243588	1	PCEC2	0.099	0.044	0.221679	2.90655e-08	0.000864262
1053	Abcb4																																					PCEC1	0.03	0.052	-0.0845905	7.04202e-05	1	PCEC2	0.074	0.041	0.0972355	0.000225053	1
1054	Abcb5																									DVR	0.006	0	0.00774602	2.66089e-05	0.791217
1055	Abcb6																															AVR	0.06	0.108	-0.173324	0.000404746	1	PCEC1	0.069	0.122	-0.257875	6.93563e-10	2.06231e-05	PCEC2	0.195	0.092	-0.504486	6.84431e-14	2.03515e-09
1056	Abcb7	AA	0.158	0.099	0.351037	0.0049608	1																															PCEC1	0.085	0.112	0.321085	0.00283215	1	PCEC2	0.134	0.098	-0.824298	0.00994156	1
1057	Abcb8																																					PCEC1	0.154	0.215	-0.0291057	1.62095e-07	0.00481988	PCEC2	0.342	0.176	0.130663	7.4226e-20	2.20711e-15
1058	Abcb9																																					PCEC1	0.072	0.099	0.033964	0.000673208	1	PCEC2	0.192	0.078	0.102271	9.32289e-19	2.77216e-14
1059	Abcc1																																					PCEC1	0.191	0.267	-0.197356	6.06949e-10	1.80476e-05	PCEC2	0.392	0.222	-0.0120391	1.6488e-19	4.90271e-15
1060	Abcc10																																											PCEC2	0.121	0.056	0.275763	3.21684e-09	9.56526e-05
1061	Abcc12	AA	0.009	0	1.21379	2.26874e-08	0.000674611
1062	Abcc3	AA	0.037	0.087	-1.96008	0.00809388	1																			DVR	0.036	0.089	-1.99704	0.000387895	1
1063	Abcc4													GE2	0.467	0.395	0.285611	0.000493777	1							DVR	0.329	0.407	-0.527463	0.00246247	1	AVR	0.318	0.412	-0.237204	2.0013e-06	0.0595087	PCEC1	0.324	0.447	-0.0935785	1.40425e-14	4.17555e-10	PCEC2	0.696	0.369	0.110462	3.9693e-41	1.18027e-36
1064	Abcc5																															AVR	0.246	0.317	-0.204249	0.000838314	1	PCEC1	0.231	0.354	-0.179002	2.40881e-19	7.1626e-15	PCEC2	0.599	0.277	0.0993042	1.16374e-46	3.4604e-42
1065	Abcc6																									DVR	0.008	0.001	0.467922	0.000105848	1
1066	Abcc9
1067	Abcd1							GE1	0.346	0.415	-0.286123	0.00186845	1																			AVR	0.322	0.419	-0.364489	2.92845e-06	0.0870774							PCEC2	0.653	0.381	-0.324932	1.84873e-31	5.49721e-27
1068	Abcd2																																					PCEC1	0.021	0.042	-0.0373976	4.82989e-05	1
1069	Abcd3																																					PCEC1	0.248	0.357	-0.0750838	4.44564e-15	1.32191e-10	PCEC2	0.584	0.287	0.209345	7.62219e-44	2.26646e-39
1070	Abcd4																															AVR	0.213	0.275	-0.244483	0.00182217	1	PCEC1	0.222	0.295	0.265985	3.55813e-07	0.0105801	PCEC2	0.501	0.242	-0.329365	9.67664e-38	2.87735e-33
1071	Abce1																															AVR	0.337	0.435	-0.227363	4.75966e-06	0.141529	PCEC1	0.343	0.471	-0.0795157	6.1359e-19	1.82451e-14	PCEC2	0.725	0.39	0.127548	1.47473e-47	4.3851e-43
1072	Abcf1																															AVR	0.423	0.535	-0.0869257	4.709e-07	0.0140022	PCEC1	0.448	0.567	0.0322603	9.26938e-15	2.75625e-10	PCEC2	0.805	0.492	0.0627979	1.25196e-40	3.72269e-36
1073	Abcf2																															AVR	0.446	0.526	0.0219508	0.00037692	1	PCEC1	0.441	0.561	0.122718	1.18686e-12	3.52913e-08	PCEC2	0.814	0.484	-0.102851	8.16236e-45	2.42708e-40
1074	Abcf3																															AVR	0.363	0.455	-0.125575	3.55534e-05	1	PCEC1	0.381	0.482	0.248928	9.49177e-09	0.000282238	PCEC2	0.725	0.414	-0.241857	1.10363e-40	3.28166e-36
1075	Abcg1	AA	0.493	0.629	-2.15343	3.04708e-12	9.06048e-08													EA	0.439	0.636	-1.65378	5.53666e-23	1.64633e-18	DVR	0.501	0.632	-1.12526	3.75847e-14	1.11758e-09	AVR	0.651	0.62	0.373511	0.000232831	1	PCEC1	0.576	0.65	0.293491	0.00927319	1	PCEC2	0.901	0.592	0.225088	1.79765e-41	5.34532e-37
1076	Abcg2							GE1	0.708	0.819	-0.971971	8.77994e-28	2.61072e-23	GE2	0.75	0.816	-0.980746	8.20826e-21	2.44072e-16							DVR	0.916	0.802	0.685657	6.59711e-28	1.96165e-23													PCEC2	0.975	0.791	-0.163985	6.21807e-19	1.84894e-14
1077	Abcg4	AA	0.009	0.001	1.22389	0.00216349	1
1078	Abhd1																															AVR	0.437	0.495	-0.343483	0.00784045	1	PCEC1	0.43	0.523	0.125381	7.29427e-09	0.000216895	PCEC2	0.705	0.465	-0.0871295	1.30404e-20	3.87757e-16
1079	Abhd10																															AVR	0.153	0.219	-0.293113	0.000392126	1	PCEC1	0.16	0.241	0.0154228	3.27568e-11	9.74023e-07	PCEC2	0.405	0.19	-0.0340548	4.6106e-28	1.37096e-23
1080	Abhd11																															AVR	0.189	0.263	-0.062046	7.67885e-05	1	PCEC1	0.187	0.293	-0.104537	2.12303e-16	6.31284e-12	PCEC2	0.544	0.222	0.160582	2.55009e-59	7.58268e-55
1081	Abhd11os																			EA	0.142	0.077	0.336569	1.82306e-05	0.542087													PCEC1	0.062	0.092	-0.0778686	0.00015064	1	PCEC2	0.114	0.078	0.0389811	0.00470354	1
1082	Abhd12																															AVR	0.324	0.394	-0.296136	0.000124563	1	PCEC1	0.32	0.425	0.184623	5.80663e-11	1.7266e-06	PCEC2	0.631	0.359	-0.228616	3.25167e-33	9.66885e-29
1083	Abhd12b																									DVR	0.058	0.031	0.0266776	0.00449297	1							PCEC1	0.023	0.038	-0.0339084	0.00192184	1
1084	Abhd13																																					PCEC1	0.11	0.157	0.00615323	3.67041e-06	0.10914	PCEC2	0.228	0.13	-0.133854	1.02275e-09	3.04114e-05
1085	Abhd14a	AA	0.205	0.133	0.797346	0.00126949	1																															PCEC1	0.096	0.158	-0.324632	2.23127e-10	6.63468e-06	PCEC2	0.25	0.123	-0.268051	3.95007e-16	1.17455e-11
1086	Abhd14b																															AVR	0.236	0.305	-0.237357	0.000328012	1	PCEC1	0.236	0.334	0.113152	3.26751e-12	9.71594e-08	PCEC2	0.528	0.272	-0.103567	7.95401e-35	2.36512e-30
1087	Abhd15																																											PCEC2	0.072	0.04	0.0223204	0.000448414	1
1088	Abhd16a							GE1	0.839	0.796	0.256077	0.0023176	1							EA	0.738	0.804	-0.0939588	0.00156051	1							AVR	0.69	0.813	-0.15407	2.22024e-10	6.60189e-06	PCEC1	0.767	0.819	0.117039	0.000266498	1	PCEC2	0.966	0.781	-0.239731	1.09649e-19	3.26041e-15
1089	Abhd17a																			EA	0.387	0.468	-0.564143	0.000405588	1	DVR	0.518	0.459	0.398057	0.00425843	1	AVR	0.367	0.475	-0.184691	1.92145e-06	0.0571344	PCEC1	0.398	0.5	0.0223142	2.00858e-08	0.000597253	PCEC2	0.759	0.43	0.228911	8.2382e-44	2.44963e-39
1090	Abhd17b							GE1	0.11	0.164	-0.339204	0.00153315	1																									PCEC1	0.125	0.179	-0.0220325	9.40289e-07	0.0279595	PCEC2	0.289	0.145	-0.0293419	1.05936e-16	3.15002e-12
1091	Abhd17c							GE1	0.114	0.074	0.574838	0.00158601	1	GE2	0.11	0.074	0.741247	0.00185539	1																			PCEC1	0.054	0.091	-0.479755	9.60488e-07	0.0285601
1092	Abhd2	AA	0.628	0.48	-0.0667173	0.000603952	1	GE1	0.431	0.491	-0.391898	0.00189142	1													DVR	0.565	0.48	0.352259	6.25541e-05	1							PCEC1	0.404	0.533	0.112974	4.29078e-15	1.27586e-10	PCEC2	0.664	0.466	0.0751345	1.56796e-13	4.66233e-09
1093	Abhd3	AA	0.07	0.035	0.15021	0.00798591	1																															PCEC1	0.025	0.043	0.0989992	0.000509471	1	PCEC2	0.09	0.03	0.100286	4.29234e-13	1.27633e-08
1094	Abhd4																															AVR	0.565	0.676	-0.156463	3.67338e-08	0.00109228	PCEC1	0.609	0.696	0.125718	3.27074e-07	0.00972554	PCEC2	0.893	0.638	-0.15762	3.16355e-31	9.40681e-27
1095	Abhd5																																					PCEC1	0.29	0.435	-0.284144	6.17692e-26	1.83671e-21	PCEC2	0.62	0.355	0.0975714	7.54997e-31	2.24499e-26
1096	Abhd6																									DVR	0.323	0.254	0.821592	0.000402213	1	AVR	0.184	0.268	-0.310616	6.88292e-06	0.204664	PCEC1	0.194	0.296	-0.261739	2.96371e-16	8.81258e-12	PCEC2	0.49	0.233	-0.0457428	8.02246e-39	2.38548e-34
1097	Abhd8							GE1	0.273	0.322	-0.518289	0.00835167	1	GE2	0.251	0.325	-0.664991	3.23119e-05	0.960793																			PCEC1	0.29	0.334	0.216606	0.00911732	1	PCEC2	0.562	0.29	0.0374883	6.77955e-37	2.0159e-32
1098	Abi1													GE2	0.648	0.575	0.287315	9.78884e-05	1																			PCEC1	0.5	0.63	-0.097924	3.12655e-19	9.29679e-15	PCEC2	0.855	0.552	-0.0862224	3.54041e-31	1.05274e-26
1099	Abi2													GE2	0.336	0.279	0.252258	0.00486732	1	EA	0.221	0.289	-0.483378	0.00474984	1													PCEC1	0.213	0.327	-0.0681612	3.32155e-17	9.87664e-13	PCEC2	0.515	0.259	0.0499981	1.96261e-33	5.83583e-29
1100	Abi3	AA	0.86	0.876	-0.91526	8.73997e-11	2.59883e-06	GE1	0.911	0.872	0.280986	7.1803e-05	1													DVR	0.847	0.878	-0.693722	6.77217e-11	2.01371e-06													PCEC2	0.989	0.863	0.0569082	4.25608e-17	1.26555e-12
1101	Abi3bp	AA	0.4	0.198	1.42422	1.5064e-16	4.47927e-12													EA	0.125	0.211	-1.20646	4.48912e-05	1	DVR	0.139	0.211	-2.55056	9.56794e-05	1	AVR	0.138	0.214	-1.12119	1.70315e-06	0.0506432	PCEC1	0.165	0.229	-0.0338885	9.80969e-08	0.00291691	PCEC2	0.362	0.188	-0.181694	2.05789e-19	6.11915e-15
1102	Abl1																																					PCEC1	0.268	0.358	0.0575303	1.21418e-10	3.61035e-06	PCEC2	0.501	0.305	-0.179716	1.66495e-21	4.95074e-17
1103	Abl2																																					PCEC1	0.101	0.13	-0.189363	0.00212559	1	PCEC2	0.199	0.11	-0.451129	2.58065e-09	7.67356e-05
1104	Ablim1	AA	0.758	0.605	0.591991	1.84362e-09	5.482e-05	GE1	0.553	0.617	-0.283992	0.000967501	1							EA	0.64	0.61	0.475125	0.00565776	1	DVR	0.682	0.606	0.501857	3.05753e-07	0.00909156							PCEC1	0.528	0.66	-0.18568	9.83453e-23	2.9243e-18	PCEC2	0.839	0.586	-0.120381	7.90744e-25	2.35128e-20
1105	Ablim2																																					PCEC1	0.012	0.026	-0.327419	0.000428843	1	PCEC2	0.004	0.023	-0.463781	0.00263522	1
1106	Ablim3	AA	0.074	0.035	1.52693	0.00140567	1																															PCEC1	0.022	0.045	-0.3499	1.01972e-05	0.303214	PCEC2	0.06	0.034	-0.200848	0.0018283	1
1107	Abr	AA	0.633	0.502	0.534919	4.64055e-07	0.0137987													EA	0.686	0.496	1.19746	4.25945e-25	1.26655e-20	DVR	0.613	0.5	0.458931	1.07955e-06	0.0321005	AVR	0.408	0.519	-0.421819	3.5104e-08	0.00104382	PCEC1	0.38	0.581	-0.432415	1.3446e-45	3.99816e-41	PCEC2	0.819	0.472	0.100599	2.58337e-47	7.68165e-43
1108	Abra																																											PCEC2	0.005	0	0.0487932	0.000216838	1
1109	Abracl																															AVR	0.227	0.326	-0.0822475	1.0171e-05	0.302435	PCEC1	0.23	0.365	-0.257172	7.80962e-23	2.32219e-18	PCEC2	0.579	0.286	0.106405	3.91927e-35	1.1654e-30
1110	Abt1																																					PCEC1	0.211	0.307	0.0322704	7.58097e-13	2.2542e-08	PCEC2	0.476	0.249	0.016191	3.72175e-28	1.10666e-23
1111	Abtb1																															AVR	0.244	0.314	-0.234966	0.000309196	1	PCEC1	0.239	0.346	0.030625	1.06264e-14	3.15976e-10	PCEC2	0.591	0.274	0.248379	4.25402e-53	1.26493e-48
1112	Abtb2																																											PCEC2	0.038	0.013	-0.424466	1.24175e-05	0.369236
1113	AC026385.1	AA	0.065	0.125	-0.541511	0.00702827	1							GE2	0.083	0.127	-0.51048	0.00168386	1	EA	0.078	0.125	-0.527257	0.00864365	1
1114	AC034285.2																																					PCEC1	0.003	0.009	-0.0106633	0.006211	1
1115	AC034285.3																									DVR	0.031	0.013	0.0180206	0.00626402	1
1116	AC055766.1																																					PCEC1	0.11	0.16	0.0253458	2.12803e-06	0.063277	PCEC2	0.271	0.127	-0.0348397	3.43785e-17	1.02225e-12
1117	AC069308.2							GE1	0.004	0	0.00582349	0.00373449	1
1118	AC073562.1																									DVR	0.047	0.024	0.164681	0.00883477	1							PCEC1	0.019	0.03	-0.0904001	0.00918015	1
1119	AC084391.1																									DVR	0.006	0.001	0.104061	0.00254037	1
1120	AC092711.4							GE1	0.406	0.461	-0.246559	0.00675625	1													DVR	0.602	0.446	0.534099	2.80543e-12	8.34195e-08	AVR	0.394	0.464	-0.0898945	0.00449101	1	PCEC1	0.379	0.501	0.0472148	5.52553e-11	1.64302e-06	PCEC2	0.7	0.429	0.0856484	3.23973e-22	9.63334e-18
1121	AC099934.1																																											PCEC2	0.007	0.001	0.0180129	0.000637358	1
1122	AC102815.1							GE1	0.174	0.317	-1.07785	2.84909e-12	8.47176e-08													DVR	0.206	0.311	-1.25432	4.97309e-07	0.0147875	AVR	0.339	0.3	0.733745	0.00208416	1	PCEC1	0.256	0.332	0.164199	2.38959e-06	0.0710546	PCEC2	0.541	0.277	-0.264359	1.99413e-29	5.92954e-25
1123	AC104930.1
1124	AC107830.1																									DVR	0.571	0.622	-0.602344	6.49653e-05	1	AVR	0.559	0.626	-0.141544	0.00268552	1	PCEC1	0.515	0.679	0.015835	2.91091e-23	8.65559e-19	PCEC2	0.94	0.583	0.363616	4.59625e-54	1.3667e-49
1125	AC108829.1	AA	0.014	0.002	0.016861	6.77746e-05	1
1126	AC108848.6																									DVR	0.011	0.002	0.859226	0.0028133	1
1127	AC113029.6																																					PCEC1	0.119	0.159	0.0368688	0.000154671	1	PCEC2	0.213	0.137	0.290899	3.46956e-06	0.103167
1128	AC116520.1													GE2	0.013	0.035	-1.28793	0.00481578	1													AVR	0.014	0.035	-1.27446	0.00690738	1	PCEC1	0.016	0.042	-1.53594	6.94681e-08	0.00206563	PCEC2	0.056	0.03	-1.18573	0.00129516	1
1129	AC116677.4																									DVR	0.053	0.027	0.102579	0.00476096	1
1130	AC117232.1																																					PCEC1	0.176	0.229	-0.0267318	7.34932e-05	1	PCEC2	0.266	0.203	0.0375487	0.00510895	1
1131	AC120402.1													GE2	0.312	0.253	0.385282	0.00233317	1																			PCEC1	0.189	0.299	-0.247846	8.00083e-18	2.37905e-13	PCEC2	0.479	0.234	0.125877	4.79743e-33	1.42651e-28
1132	AC122428.1							GE1	0.079	0.149	-0.324039	2.76188e-05	0.821244	GE2	0.206	0.136	0.266634	4.64266e-06	0.138049	EA	0.198	0.139	0.33393	0.00179876	1							AVR	0.194	0.137	0.380161	7.46315e-05	1	PCEC1	0.092	0.172	-0.377103	1.03024e-15	3.06343e-11	PCEC2	0.19	0.138	0.105542	0.00277994	1
1133	AC122804.1							GE1	0.437	0.386	0.189302	0.0099991	1													DVR	0.538	0.381	0.315693	9.85824e-10	2.93135e-05	AVR	0.329	0.398	-0.259951	0.000859586	1	PCEC1	0.328	0.427	-0.0871458	2.00979e-09	5.97612e-05	PCEC2	0.506	0.378	0.220675	9.79214e-07	0.0291169
1134	AC122844.1																									DVR	0.145	0.082	0.231391	6.31354e-05	1
1135	AC123530.1							GE1	0.031	0.012	0.0427583	0.000465554	1
1136	AC123608.1							GE1	0.01	0.001	0.134419	7.7955e-07	0.0231799
1137	AC123686.1																															AVR	0.002	0.016	-0.0210291	0.00754929	1
1138	AC124457.1																															AVR	0.04	0.019	0.16961	0.00132153	1	PCEC1	0.015	0.025	-0.171085	0.00748871	1
1139	AC124613.1							GE1	0.002	0	0.00705952	0.0013242	1
1140	AC125099.2																			EA	0.067	0.032	0.409417	0.000532414	1
1141	AC125167.1
1142	AC127252.1
1143	AC131325.1	AA	0.009	0.001	0.0132767	0.000798308	1
1144	AC132147.1	AA	0.005	0	0.00364743	0.000808947	1
1145	AC132393.1																															AVR	0.332	0.387	-0.138539	0.00546429	1	PCEC1	0.315	0.419	-0.00369447	2.62418e-12	7.803e-08	PCEC2	0.664	0.349	-0.0708613	6.27267e-44	1.86518e-39
1146	AC133189.1																																					PCEC1	0.03	0.048	-0.0508037	0.000840813	1
1147	AC136146.1																																											PCEC2	0.087	0.042	0.400313	2.97558e-06	0.088479
1148	AC139186.1
1149	AC141868.1							GE1	0.033	0.015	0.0335523	0.0025973	1
1150	AC147560.1	AA	0.809	0.703	0.182712	0.000284715	1													EA	0.773	0.703	0.280707	2.32554e-07	0.00691499	DVR	0.643	0.712	-0.307072	2.02575e-05	0.602356							PCEC1	0.631	0.752	-0.0459781	2.59477e-08	0.000771556	PCEC2	0.855	0.691	0.0187584	0.00541621	1
1151	AC151967.1	AA	0.349	0.252	0.317015	0.00104142	1							GE2	0.305	0.25	0.148165	0.00540952	1																			PCEC1	0.194	0.291	-0.145889	2.52185e-12	7.49872e-08	PCEC2	0.392	0.24	0.121862	8.93661e-11	2.6573e-06
1152	AC153941.1																															AVR	0.158	0.099	1.289	1.7598e-06	0.0523277	PCEC1	0.052	0.136	-0.926942	1.85595e-22	5.51866e-18	PCEC2	0.212	0.093	-0.497063	4.63823e-17	1.37918e-12
1153	AC154102.1																									DVR	0.014	0.004	0.0107201	0.00332389	1
1154	AC154241.1
1155	AC154247.1
1156	AC154540.1													GE2	0.108	0.057	0.151879	3.02128e-06	0.0898378																			PCEC1	0.035	0.079	-0.123462	1.04745e-10	3.11461e-06	PCEC2	0.107	0.058	0.170941	5.1567e-06	0.153335
1157	AC155839.1	AA	0.116	0.034	0.744227	2.67033e-10	7.94023e-06
1158	AC160635.1													GE2	0.068	0.032	0.0900752	1.6378e-05	0.487																			PCEC1	0.024	0.043	-0.0333013	0.000204696	1
1159	AC161199.1
1160	AC161246.1
1161	AC161363.1
1162	AC161570.1
1163	AC161585.1																																											PCEC2	0.011	0.003	0.0489024	0.00506149	1
1164	AC165278.1																																					PCEC1	0.022	0.041	-0.0163917	0.000163091	1	PCEC2	0.052	0.032	0.0685042	0.00996212	1
1165	Acaa1a																																					PCEC1	0.588	0.692	0.135411	3.73983e-08	0.00111204	PCEC2	0.892	0.627	0.0501983	3.9777e-22	1.18277e-17
1166	Acaa2							GE1	0.743	0.665	0.257395	0.000305513	1													DVR	0.604	0.677	-0.34388	0.000214821	1	AVR	0.577	0.683	-0.184413	1.37575e-08	0.000409079							PCEC2	0.877	0.649	-0.281679	1.1686e-19	3.47484e-15
1167	Acaca																																					PCEC1	0.106	0.167	0.0431354	1.26546e-09	3.76285e-05	PCEC2	0.246	0.134	0.156766	4.38083e-13	1.30264e-08
1168	Acacb	AA	0.149	0.068	1.44574	1.31616e-06	0.0391359	GE1	0.037	0.074	-1.33328	0.00171402	1																									PCEC1	0.055	0.081	-0.0436343	0.000363143	1	PCEC2	0.132	0.064	0.00973753	4.94984e-09	0.000147183
1169	Acad10	AA	0.256	0.184	-0.224838	0.00500398	1																															PCEC1	0.144	0.212	-0.0124627	4.48959e-09	0.000133498	PCEC2	0.289	0.176	-0.271338	2.02269e-11	6.01446e-07
1170	Acad11																															AVR	0.108	0.152	0.0573666	0.00584996	1	PCEC1	0.112	0.168	-0.162206	4.8997e-08	0.00145693	PCEC2	0.293	0.131	0.0307824	4.62507e-24	1.37526e-19
1171	Acad12																																											PCEC2	0.383	0.296	0.0205553	9.97971e-06	0.296747
1172	Acad8																																					PCEC1	0.233	0.332	0.0476516	1.85901e-12	5.52777e-08	PCEC2	0.51	0.272	-0.527732	2.17738e-28	6.47443e-24
1173	Acad9							GE1	0.412	0.47	-0.295916	0.00423443	1																									PCEC1	0.398	0.503	0.0764838	9.98228e-10	2.96823e-05	PCEC2	0.638	0.446	-0.0653932	3.83467e-14	1.14024e-09
1174	Acadl																															AVR	0.453	0.515	-0.0405557	0.00132845	1	PCEC1	0.414	0.563	-0.115049	1.67568e-22	4.98265e-18	PCEC2	0.807	0.475	0.0485808	1.76029e-47	5.23422e-43
1175	Acadm																															AVR	0.377	0.481	-0.265655	5.97172e-07	0.0177569	PCEC1	0.393	0.514	-0.0712485	8.97895e-15	2.66989e-10	PCEC2	0.745	0.439	0.026556	1.96214e-37	5.83444e-33
1176	Acads																									DVR	0.29	0.234	0.751616	0.00265156	1	AVR	0.189	0.244	0.0269323	0.0049678	1	PCEC1	0.207	0.256	-0.19887	5.82874e-05	1	PCEC2	0.412	0.218	-0.0237274	1.47599e-21	4.38887e-17
1177	Acadsb																															AVR	0.358	0.434	0.0344263	0.000509213	1	PCEC1	0.365	0.461	0.153585	1.61348e-08	0.000479769	PCEC2	0.64	0.402	-0.27801	9.23083e-23	2.74479e-18
1178	Acadvl																									DVR	0.699	0.631	0.260215	0.000684086	1	AVR	0.549	0.646	-0.040492	1.33769e-05	0.397762	PCEC1	0.571	0.673	-0.0384519	3.7328e-13	1.10995e-08	PCEC2	0.877	0.608	-0.188504	1.58879e-31	4.72427e-27
1179	Acan																																											PCEC2	0.005	0.001	0.0495486	0.00119615	1
1180	Acap1																			EA	0.015	0.051	-0.935032	0.00223163	1																			PCEC2	0.118	0.041	-0.207993	6.2063e-15	1.84544e-10
1181	Acap2																									DVR	0.387	0.5	-0.791383	2.17312e-07	0.00646178							PCEC1	0.434	0.526	0.116601	3.71526e-07	0.0110473	PCEC2	0.788	0.459	0.272785	3.19529e-42	9.50118e-38
1182	Acap3																															AVR	0.296	0.388	0.0758134	1.89883e-05	0.564617	PCEC1	0.316	0.415	-0.0405856	3.95465e-12	1.17591e-07	PCEC2	0.655	0.348	0.0655418	1.90516e-45	5.66501e-41
1183	Acat1																															AVR	0.496	0.612	-0.227787	1.4346e-09	4.26578e-05	PCEC1	0.542	0.633	0.108676	6.25969e-07	0.0186132	PCEC2	0.852	0.571	0.0144437	1.40533e-33	4.17876e-29
1184	Acat2																																					PCEC1	0.167	0.233	0.282637	6.82038e-07	0.0202804	PCEC2	0.358	0.192	-0.102255	3.32525e-17	9.88764e-13
1185	Acat3																																					PCEC1	0.273	0.357	-0.0309253	7.64667e-08	0.00227374	PCEC2	0.45	0.313	0.0433716	9.35471e-07	0.0278162
1186	Acbd3																																					PCEC1	0.209	0.301	-0.000981965	3.36416e-12	1.00033e-07	PCEC2	0.421	0.25	-0.210483	4.898e-17	1.45642e-12
1187	Acbd4																															AVR	0.327	0.406	-0.238456	6.09283e-05	1	PCEC1	0.332	0.435	0.0469607	1.64296e-11	4.88535e-07	PCEC2	0.656	0.368	0.0559849	4.46456e-36	1.32754e-31
1188	Acbd5							GE1	0.219	0.288	-0.50066	0.00132855	1																									PCEC1	0.202	0.328	-0.155538	1.11053e-21	3.30216e-17	PCEC2	0.492	0.258	-0.264848	1.95761e-26	5.82095e-22
1189	Acbd6																															AVR	0.365	0.426	-0.0231953	0.0041547	1	PCEC1	0.329	0.472	-0.169772	1.38304e-19	4.11247e-15	PCEC2	0.667	0.392	0.008728	5.55127e-28	1.65067e-23
1190	Acbd7
1191	Accs																															AVR	0.129	0.192	0.416171	0.000644267	1	PCEC1	0.154	0.203	0.0519725	3.3267e-05	0.989194	PCEC2	0.369	0.164	-0.00572431	2.43107e-31	7.2288e-27
1192	Accsl							GE1	0.002	0	0.00370154	0.0013242	1
1193	Acd																																					PCEC1	0.387	0.493	0.17429	1.29982e-10	3.86501e-06	PCEC2	0.718	0.425	-0.193468	1.48065e-38	4.40271e-34
1194	Ace	AA	0.758	0.11	3.6358	3.26952e-194	9.72192e-190													EA	0.084	0.139	-1.72243	0.00210806	1	DVR	0.061	0.141	-2.10782	1.15987e-05	0.344887	AVR	0.06	0.145	-2.09349	4.53452e-09	0.000134834	PCEC1	0.058	0.181	-1.83095	2.81284e-39	8.36398e-35	PCEC2	0.288	0.119	-0.270619	1.91834e-25	5.70417e-21
1195	Ace2	AA	0.019	0.003	0.00125692	0.000570884	1
1196	ACEA-U3.1							GE1	0.017	0.006	0.0378467	0.00773742	1
1197	Acer1	AA	0.042	0.012	0.0752044	0.000225806	1
1198	Acer2							GE1	0.942	0.936	0.0942094	0.00639521	1	GE2	0.946	0.935	0.141222	0.00195225	1	EA	0.901	0.938	-0.387672	2.18946e-07	0.00651037	DVR	0.986	0.933	0.547696	9.73104e-28	2.89353e-23							PCEC1	0.912	0.95	-0.0787784	1.80889e-12	5.37873e-08
1199	Acer3																															AVR	0.096	0.143	0.122001	0.00347034	1	PCEC1	0.083	0.17	-0.609232	3.64609e-19	1.08416e-14	PCEC2	0.336	0.115	0.0305247	2.84191e-43	8.45042e-39
1200	Acin1													GE2	0.46	0.384	0.162953	7.99789e-05	1																			PCEC1	0.317	0.434	-0.112746	1.82976e-15	5.4408e-11	PCEC2	0.537	0.375	0.170435	2.01723e-08	0.000599823
1201	Ackr1																																					PCEC1	0.002	0.011	-0.192891	0.000130955	1	PCEC2	0.034	0.004	0.57987	3.31292e-15	9.85098e-11
1202	Ackr2							GE1	0.251	0.165	1.41909	9.67338e-08	0.00287638	GE2	0.239	0.165	1.1288	3.36324e-07	0.0100006	EA	0.11	0.177	-2.65231	0.00075799	1	DVR	0.128	0.176	-2.61191	0.00979417	1	AVR	0.1	0.181	-1.16343	2.87873e-07	0.00855991	PCEC1	0.123	0.201	-0.372119	3.91633e-13	1.16452e-08	PCEC2	0.342	0.153	-0.835317	1.25728e-26	3.73853e-22
1203	Ackr3	AA	0.344	0.223	0.903133	1.69538e-06	0.0504121							GE2	0.174	0.233	-0.880228	0.000339756	1							DVR	0.145	0.233	-1.49096	2.7264e-05	0.810695	AVR	0.181	0.233	0.21811	0.00597124	1	PCEC1	0.168	0.261	-0.573185	1.78705e-15	5.31381e-11	PCEC2	0.436	0.204	-0.0131198	6.50106e-36	1.93309e-31
1204	Ackr4																									DVR	0.086	0.053	0.320962	0.00683426	1							PCEC1	0.041	0.064	-0.358863	0.000250154	1
1205	Acly																															AVR	0.756	0.795	0.0211093	0.00190661	1	PCEC1	0.758	0.809	0.0785273	6.57883e-05	1	PCEC2	0.958	0.772	-0.0908894	4.71845e-22	1.40303e-17
1206	Acmsd																															AVR	0.072	0.045	0.10505	0.00448156	1	PCEC1	0.031	0.058	-0.0205979	5.50686e-06	0.163747
1207	Acnat1																																					PCEC1	0.054	0.075	-0.13865	0.00319649	1	PCEC2	0.101	0.063	-0.00149665	0.000709662	1
1208	Aco1																															AVR	0.2	0.301	0.0106878	2.23343e-06	0.066411	PCEC1	0.234	0.323	0.0890607	3.46975e-11	1.03173e-06	PCEC2	0.544	0.262	0.0179064	1.91411e-41	5.69161e-37
1209	Aco2																									DVR	0.788	0.759	0.209029	0.0077086	1	AVR	0.699	0.768	-0.114509	9.10595e-06	0.270766	PCEC1	0.714	0.788	0.0958289	1.25742e-07	0.00373894	PCEC2	0.955	0.739	-0.103613	3.61811e-27	1.07584e-22
1210	Acot1
1211	Acot11																																					PCEC1	0.053	0.078	0.277495	0.000579817	1
1212	Acot12																									DVR	0.008	0.002	0.35524	0.00988607	1
1213	Acot13																									DVR	0.379	0.309	0.450151	0.000234352	1	AVR	0.255	0.321	-0.222004	0.000756897	1	PCEC1	0.244	0.354	-0.0672862	1.81566e-14	5.39887e-10	PCEC2	0.533	0.289	0.201822	2.06577e-26	6.14258e-22
1214	Acot2	AA	0.344	0.227	0.219328	5.52063e-05	1																									AVR	0.169	0.239	-0.374205	7.70251e-05	1	PCEC1	0.174	0.265	-0.306968	5.80343e-14	1.72565e-09	PCEC2	0.396	0.213	0.209333	1.25684e-20	3.73722e-16
1215	Acot3																									DVR	0.011	0.002	0.00368639	0.000879959	1
1216	Acot5																									DVR	0.011	0.002	0.011889	0.00165927	1
1217	Acot7																			EA	0.041	0.097	-0.862754	0.000377702	1													PCEC1	0.065	0.111	-0.0208451	3.22398e-08	0.00095865	PCEC2	0.235	0.078	0.223804	4.3815e-33	1.30284e-28
1218	Acot8																															AVR	0.21	0.331	-0.242042	5.33068e-09	0.000158508	PCEC1	0.271	0.344	0.0211787	2.64463e-07	0.00786381	PCEC2	0.559	0.291	0.0300728	7.392e-36	2.19801e-31
1219	Acot9	AA	0.642	0.507	0.401213	1.66192e-05	0.494173							GE2	0.465	0.518	-0.464669	0.000284097	1													AVR	0.463	0.518	-0.14876	0.00229565	1	PCEC1	0.434	0.558	0.0872534	3.5973e-13	1.06966e-08	PCEC2	0.807	0.479	-0.132883	1.72663e-39	5.13413e-35
1220	Acox1																									DVR	0.616	0.518	0.556311	6.20719e-08	0.00184571							PCEC1	0.446	0.569	-0.0893868	4.54069e-17	1.35017e-12	PCEC2	0.756	0.498	-0.282547	1.26241e-20	3.75377e-16
1221	Acox2																															AVR	0.077	0.05	0.846863	0.005588	1	PCEC1	0.039	0.06	-0.218185	0.000842081	1
1222	Acox3																															AVR	0.243	0.306	-0.218876	0.000629596	1	PCEC1	0.245	0.33	0.0995647	3.24778e-09	9.65728e-05	PCEC2	0.557	0.27	0.322671	1.6325e-43	4.85425e-39
1223	Acp1																															AVR	0.265	0.364	-0.181744	1.81055e-06	0.0538366	PCEC1	0.287	0.391	0.128414	9.46383e-12	2.81407e-07	PCEC2	0.633	0.322	-0.0736605	1.45689e-42	4.33206e-38
1224	Acp2	AA	0.474	0.38	0.388904	0.00209235	1																									AVR	0.329	0.39	0.132284	0.00279259	1	PCEC1	0.317	0.422	-0.0889476	4.40275e-12	1.30916e-07	PCEC2	0.613	0.358	-0.240606	4.15224e-25	1.23467e-20
1225	Acp5																																					PCEC1	0.005	0.013	-0.218948	0.00303786	1
1226	Acp6																																					PCEC1	0.269	0.385	0.0658361	1.84245e-16	5.47852e-12	PCEC2	0.526	0.322	-0.287501	8.82741e-24	2.62483e-19
1227	Acpt																																					PCEC1	0.084	0.132	-0.0891076	2.56852e-07	0.0076375	PCEC2	0.159	0.109	0.0600066	0.00112534	1
1228	Acr
1229	Acrbp																																					PCEC1	0.035	0.077	-0.249638	7.01694e-10	2.08649e-05	PCEC2	0.145	0.053	0.147296	5.18512e-17	1.5418e-12
1230	Acsbg1																									DVR	0.006	0.001	0.00968382	0.00254037	1
1231	Acsf2																			EA	0.183	0.329	-0.97522	6.58704e-10	1.95866e-05	DVR	0.217	0.327	-0.789186	1.77281e-06	0.0527146							PCEC1	0.329	0.315	0.502431	0.00365942	1	PCEC2	0.447	0.306	-0.0852309	2.06774e-08	0.000614843
1232	Acsf3																															AVR	0.119	0.159	-0.14862	0.00924058	1	PCEC1	0.128	0.169	0.195896	0.000213974	1	PCEC2	0.304	0.137	-0.342325	4.71493e-23	1.40198e-18
1233	Acsl1																																					PCEC1	0.153	0.21	-0.108606	7.89667e-07	0.0234808	PCEC2	0.344	0.172	0.0358336	7.88341e-22	2.34413e-17
1234	Acsl3													GE2	0.178	0.128	-0.0101921	0.00220126	1																			PCEC1	0.104	0.15	-0.159642	5.51769e-06	0.164068	PCEC2	0.175	0.128	-0.427866	0.00296772	1
1235	Acsl4																																					PCEC1	0.184	0.271	-0.0690287	2.47513e-12	7.35981e-08	PCEC2	0.405	0.221	0.111822	1.01077e-19	3.00551e-15
1236	Acsl5	AA	0.781	0.742	0.0965295	0.00895147	1													EA	0.663	0.749	-0.476755	3.03696e-06	0.0903041													PCEC1	0.704	0.767	0.197697	0.00358298	1	PCEC2	0.944	0.721	-0.21381	8.16703e-23	2.42847e-18
1237	Acsm2
1238	Acsm3
1239	Acsm5							GE1	0.012	0.002	0.0359554	0.000118693	1
1240	Acss1													GE2	0.232	0.186	0.584206	0.00678444	1	EA	0.253	0.186	0.570823	0.00148273	1							AVR	0.103	0.201	0.122535	2.07656e-08	0.000617465	PCEC1	0.118	0.232	-0.580153	4.0693e-25	1.21001e-20	PCEC2	0.447	0.162	0.0709794	1.5364e-56	4.56848e-52
1241	Acss2																																					PCEC1	0.13	0.178	0.0182057	1.29151e-05	0.384029
1242	Acta1							GE1	0.128	0.085	0.0343123	0.000812878	1
1243	Acta2	AA	0.521	0.252	3.03969	1.19593e-28	3.5561e-24																															PCEC1	0.183	0.309	-1.96676	5.41337e-26	1.60966e-21	PCEC2	0.338	0.254	-0.827552	2.22427e-05	0.661385
1244	Actb	AA	1	1	-0.282982	1.38939e-15	4.13134e-11	GE1	1	1	0.0916787	9.20652e-07	0.0273756	GE2	1	1	-0.0861247	0.000912194	1							DVR	1	1	-0.12404	8.05613e-07	0.0239549							PCEC1	1	1	0.0946204	6.20774e-10	1.84587e-05
1245	Actg-ps1																																											PCEC2	0.045	0.076	-0.0510369	0.00898069	1
1246	Actg1	AA	1	0.999	0.144958	9.68984e-05	1													EA	1	0.999	0.272073	2.95543e-19	8.78798e-15							AVR	1	0.999	0.077103	0.00105165	1	PCEC1	0.998	1	-0.0469884	0.000755713	1	PCEC2	1	0.999	-0.0886532	0.000820814	1
1247	Actl6a																															AVR	0.387	0.484	-0.186055	3.76882e-06	0.112066	PCEC1	0.395	0.519	0.0321658	4.78858e-15	1.42388e-10	PCEC2	0.769	0.44	-0.115294	1.91804e-41	5.70328e-37
1248	Actn1	AA	0.172	0.059	0.864802	2.24086e-11	6.66321e-07							GE2	0.092	0.061	0.115504	0.00510018	1																			PCEC1	0.042	0.076	-0.298115	4.45991e-07	0.0132615
1249	Actn2
1250	Actn4	AA	0.991	0.97	0.272048	5.91598e-07	0.0175912	GE1	0.971	0.971	-0.318115	1.4995e-07	0.00445877	GE2	0.968	0.972	-0.344028	1.89211e-08	0.000562619							DVR	0.989	0.97	0.235492	7.82693e-07	0.0232734													PCEC2	1	0.968	-0.000212457	0.000210709	1
1251	Actr10																															AVR	0.561	0.648	-0.0713134	2.03683e-05	0.605652	PCEC1	0.564	0.681	-0.0406605	5.79647e-16	1.72358e-11	PCEC2	0.904	0.609	-0.0578881	1.898e-36	5.64371e-32
1252	Actr1a																									DVR	0.71	0.755	-0.183098	0.00962309	1	AVR	0.68	0.761	-0.228676	1.48046e-07	0.00440216	PCEC1	0.712	0.775	0.119075	0.000149851	1	PCEC2	0.924	0.733	-0.233773	2.91756e-17	8.67535e-13
1253	Actr1b																															AVR	0.539	0.604	-0.152881	0.000495388	1	PCEC1	0.53	0.635	0.0679069	5.09866e-11	1.51609e-06	PCEC2	0.81	0.573	-0.227621	4.12033e-25	1.22518e-20
1254	Actr2																																					PCEC1	0.581	0.726	-0.139399	1.13471e-21	3.37405e-17	PCEC2	0.908	0.647	0.2417	2.84042e-24	8.44598e-20
1255	Actr3							GE1	0.681	0.654	0.279606	0.00832935	1																									PCEC1	0.561	0.711	-0.151168	4.47009e-28	1.32918e-23	PCEC2	0.902	0.629	-0.14389	5.33585e-22	1.58662e-17
1256	Actr3b
1257	Actr5																															AVR	0.036	0.068	-0.795654	0.00307545	1	PCEC1	0.052	0.071	0.0557778	0.00453417	1	PCEC2	0.163	0.053	0.293854	3.94601e-23	1.17335e-18
1258	Actr6																																					PCEC1	0.105	0.142	0.123895	0.00036334	1	PCEC2	0.241	0.116	0.136358	1.66251e-15	4.94347e-11
1259	Actr8																															AVR	0.305	0.39	0.14416	0.000366959	1	PCEC1	0.316	0.418	0.0288496	6.15704e-12	1.8308e-07	PCEC2	0.658	0.349	-0.0703047	4.77977e-44	1.42127e-39
1260	Acvr1																															AVR	0.065	0.101	0.123397	0.00756071	1	PCEC1	0.078	0.108	-0.100121	0.000499994	1	PCEC2	0.15	0.091	-0.566406	1.96309e-05	0.583725
1261	Acvr1b	AA	0.13	0.08	0.831532	0.00724659	1							GE2	0.12	0.078	0.577014	0.000353236	1																			PCEC1	0.053	0.099	-0.512918	5.93395e-09	0.000176446	PCEC2	0.168	0.072	0.282771	4.26942e-14	1.26951e-09
1262	Acvr2a							GE1	0.224	0.311	-0.629678	1.91396e-05	0.569116																									PCEC1	0.242	0.338	0.0771478	4.79838e-11	1.4268e-06	PCEC2	0.55	0.276	-0.0415823	9.2e-35	2.73562e-30
1263	Acvr2b																																					PCEC1	0.02	0.037	-0.124659	0.000454391	1	PCEC2	0.06	0.028	0.557758	4.47211e-05	1
1264	Acvrl1	AA	0.916	0.869	0.61689	3.25624e-16	9.68243e-12	GE1	0.905	0.867	0.409692	1.25407e-09	3.72899e-05	GE2	0.899	0.867	0.175832	1.76341e-05	0.524349	EA	0.898	0.869	0.4378	4.02166e-08	0.00119584	DVR	0.905	0.868	0.26994	5.69429e-06	0.16932	AVR	0.802	0.879	-0.394861	4.63289e-14	1.37759e-09	PCEC1	0.821	0.899	-0.385216	7.33383e-44	2.18071e-39	PCEC2	0.987	0.857	-0.139588	3.7705e-12	1.12116e-07
1265	Acy1																																					PCEC1	0.074	0.104	0.164066	0.000419331	1	PCEC2	0.152	0.087	-0.739603	1.1511e-06	0.0342279
1266	Acy3																															AVR	0.224	0.297	-0.0488807	0.000303864	1	PCEC1	0.232	0.323	0.0132284	4.15278e-11	1.23483e-06	PCEC2	0.523	0.263	-0.0509317	5.45177e-36	1.62108e-31
1267	Acyp1																																					PCEC1	0.094	0.142	-0.15707	5.89733e-07	0.0175357	PCEC2	0.212	0.114	-0.267981	1.48116e-09	4.40422e-05
1268	Acyp2							GE1	0.277	0.339	-0.192611	0.00565103	1																									PCEC1	0.277	0.366	-0.084116	2.2041e-08	0.000655388	PCEC2	0.506	0.314	-0.140761	5.36463e-13	1.59517e-08
1269	Ada	AA	0.544	0.569	-2.46688	0.000481952	1							GE2	0.524	0.573	-0.986358	1.18373e-06	0.0351983	EA	0.451	0.576	-1.85151	4.96204e-10	1.47546e-05	DVR	0.432	0.578	-2.84334	4.75069e-18	1.41262e-13	AVR	0.47	0.58	-0.219163	5.70195e-07	0.0169547	PCEC1	0.578	0.563	1.0417	5.96545e-12	1.77383e-07	PCEC2	0.801	0.542	-0.204153	5.42022e-29	1.6117e-24
1270	Adal																																					PCEC1	0.121	0.177	0.169208	3.0506e-07	0.00907094	PCEC2	0.273	0.143	-0.216446	3.97086e-14	1.18074e-09
1271	Adam10	AA	0.884	0.797	0.475132	2.05713e-11	6.11688e-07	GE1	0.787	0.802	-0.208919	0.00349806	1	GE2	0.792	0.801	-0.243222	0.000937633	1													AVR	0.75	0.806	-0.0711777	0.00843575	1	PCEC1	0.749	0.83	-0.00917223	4.07444e-06	0.121154	PCEC2	0.966	0.782	0.0584955	6.565e-13	1.9521e-08
1272	Adam11																									DVR	0.019	0.05	-0.972775	0.00975164	1													PCEC2	0.078	0.044	-0.489465	0.000548177	1
1273	Adam12													GE2	0.072	0.043	0.74091	0.00177573	1																			PCEC1	0.026	0.058	-1.23081	8.17451e-08	0.00243069	PCEC2	0.101	0.04	0.507202	8.82478e-11	2.62405e-06
1274	Adam15	AA	0.977	0.972	-0.377536	0.000553129	1	GE1	0.959	0.974	-0.731703	3.43688e-29	1.02196e-24	GE2	0.946	0.976	-0.967668	3.67766e-50	1.09355e-45	EA	0.98	0.972	0.45263	9.61454e-14	2.85888e-09	DVR	0.986	0.972	0.176742	6.11899e-05	1							PCEC1	0.975	0.971	0.331625	7.87552e-19	2.34178e-14	PCEC2	0.998	0.97	0.0398815	2.29542e-07	0.00682543
1275	Adam17	AA	0.758	0.656	0.379523	1.78716e-07	0.00531411																									AVR	0.627	0.664	-0.112044	0.00573953	1	PCEC1	0.558	0.719	0.0163715	1.03152e-23	3.06724e-19	PCEC2	0.904	0.633	-0.0660291	5.80468e-28	1.72602e-23
1276	Adam19																																					PCEC1	0.082	0.126	0.38984	3.35388e-06	0.0997277	PCEC2	0.244	0.095	0.377329	4.86607e-26	1.44693e-21
1277	Adam1a																															AVR	0.028	0.013	0.506586	0.00602219	1
1278	Adam1b													GE2	0.002	0	0.00251262	0.00300224	1
1279	Adam21							GE1	0.006	0.001	0.771158	0.00955573	1
1280	Adam22																																					PCEC1	0.061	0.089	-0.0338159	0.000175004	1
1281	Adam28																																					PCEC1	0.064	0.099	-0.0838032	7.31627e-06	0.217549	PCEC2	0.125	0.082	0.332434	0.000430051	1
1282	Adam32	AA	0.005	0	0.0815666	0.00881994	1
1283	Adam4																																											PCEC2	0.022	0.008	-0.123362	0.00185633	1
1284	Adam9	AA	0.386	0.282	0.710971	0.000279818	1																									AVR	0.208	0.295	-0.0981737	1.37609e-05	0.40918	PCEC1	0.244	0.31	0.100871	5.01011e-06	0.148976	PCEC2	0.49	0.263	-0.290726	5.01053e-25	1.48988e-20
1285	Adamdec1	AA	0.144	0.055	1.80648	1.54845e-08	0.000460432													EA	0.026	0.061	-1.74625	0.00757371	1							AVR	0.031	0.062	-0.391875	0.00297618	1
1286	Adamts1													GE2	0.916	0.74	1.34418	1.06483e-76	3.16629e-72							DVR	0.752	0.758	-0.659695	7.23521e-06	0.215139	AVR	0.78	0.755	0.653804	1.87321e-08	0.000556999	PCEC1	0.636	0.828	-0.956231	1.51935e-96	4.51779e-92	PCEC2	0.976	0.733	-0.0977476	1.16233e-45	3.45618e-41
1287	Adamts10	AA	0.502	0.334	0.838499	2.40466e-09	7.15025e-05																									AVR	0.272	0.349	-0.298319	0.000197988	1	PCEC1	0.266	0.383	-0.237802	1.37342e-16	4.08387e-12	PCEC2	0.637	0.307	0.537072	1.51417e-52	4.50239e-48
1288	Adamts12
1289	Adamts15																																					PCEC1	0.006	0.013	-0.0836685	0.00695861	1
1290	Adamts16							GE1	0.246	0.126	1.63304	5.29568e-16	1.57467e-11	GE2	0.323	0.115	2.02753	6.10942e-47	1.81664e-42	EA	0.087	0.14	-2.19239	0.00458773	1	DVR	0.067	0.141	-2.3087	3.97921e-05	1	AVR	0.071	0.144	-2.32809	3.36089e-07	0.00999362	PCEC1	0.068	0.176	-2.10805	7.88139e-31	2.34353e-26	PCEC2	0.222	0.127	-0.289465	2.16355e-09	6.43331e-05
1291	Adamts17
1292	Adamts2																									DVR	0.114	0.074	0.0569572	0.00684323	1							PCEC1	0.057	0.088	-0.00261586	5.96593e-05	1	PCEC2	0.112	0.072	0.0489502	0.00103147	1
1293	Adamts20
1294	Adamts3																																											PCEC2	0.018	0.004	0.651648	2.3448e-05	0.697226
1295	Adamts4							GE1	0.035	0.087	-0.370827	6.42621e-05	1							EA	0.044	0.085	-0.570014	0.0065803	1													PCEC1	0.065	0.093	-0.81029	0.000232479	1	PCEC2	0.154	0.075	-0.133445	3.21216e-10	9.55136e-06
1296	Adamts5							GE1	0.188	0.135	0.659457	0.000338053	1	GE2	0.25	0.127	1.5933	1.97795e-17	5.88145e-13													AVR	0.088	0.146	-0.723995	0.000118028	1	PCEC1	0.091	0.167	-0.647784	4.92879e-15	1.46557e-10	PCEC2	0.235	0.129	-0.376717	6.16748e-11	1.8339e-06
1297	Adamts6																																											PCEC2	0.083	0.051	-0.0099085	0.00191314	1
1298	Adamts7	AA	0.209	0.321	-2.79593	1.3524e-05	0.402136							GE2	0.422	0.305	0.546558	8.57838e-09	0.000255078	EA	0.235	0.322	-1.58094	4.30486e-05	1	DVR	0.212	0.324	-2.81598	5.60583e-08	0.00166689							PCEC1	0.276	0.34	0.000356999	5.99389e-05	1	PCEC2	0.526	0.293	0.094217	1.05754e-29	3.14461e-25
1299	Adamts9																			EA	0.125	0.221	-0.699311	9.47712e-06	0.281802							AVR	0.258	0.21	0.40438	0.00132498	1	PCEC1	0.176	0.238	-0.0665708	8.89013e-07	0.0264348	PCEC2	0.344	0.201	0.421247	2.88703e-13	8.58459e-09
1300	Adamtsl1																			EA	0.035	0.071	-1.37317	0.00993758	1	DVR	0.114	0.066	2.03052	0.000150568	1	AVR	0.04	0.072	-0.977671	0.00266557	1	PCEC1	0.038	0.086	-0.811204	9.55001e-12	2.8397e-07	PCEC2	0.188	0.055	-0.109109	2.23432e-31	6.64374e-27
1301	Adamtsl2																			EA	0.238	0.33	-1.42422	2.52533e-05	0.750907	DVR	0.192	0.333	-2.37511	4.3631e-10	1.29737e-05	AVR	0.231	0.335	-0.214641	1.6317e-06	0.0485187							PCEC2	0.59	0.294	0.00889924	1.99646e-45	5.93647e-41
1302	Adamtsl3
1303	Adamtsl4	AA	0.149	0.09	1.20647	0.00253265	1																															PCEC1	0.048	0.118	-0.441903	1.58063e-17	4.7e-13	PCEC2	0.166	0.084	-0.461549	3.13247e-10	9.3144e-06
1304	Adamtsl5							GE1	0.462	0.25	1.99035	7.52541e-37	2.23768e-32	GE2	0.452	0.247	1.7487	1.52009e-36	4.51999e-32	EA	0.169	0.275	-0.760747	7.25413e-06	0.215702	DVR	0.198	0.273	-2.83682	0.000206073	1	AVR	0.131	0.285	-3.12847	9.13213e-18	2.71544e-13	PCEC1	0.173	0.323	-2.42228	1.50365e-39	4.4711e-35	PCEC2	0.528	0.239	-0.515701	1.37578e-42	4.09088e-38
1305	Adap1
1306	Adap2
1307	Adap2os
1308	Adar							GE1	0.402	0.542	-0.559287	7.68354e-10	2.2847e-05																									PCEC1	0.477	0.56	-0.00781701	4.2026e-07	0.0124964	PCEC2	0.814	0.498	0.506046	2.25414e-44	6.70269e-40
1309	Adarb1																			EA	0.288	0.35	-0.807088	0.00858251	1													PCEC1	0.3	0.372	0.417155	9.13233e-05	1	PCEC2	0.548	0.323	-0.0463094	1.00694e-23	2.99413e-19
1310	Adarb2							GE1	0.006	0.025	-0.0785325	0.00785891	1
1311	Adat1																																					PCEC1	0.039	0.08	-0.319261	2.60159e-09	7.73584e-05	PCEC2	0.136	0.057	0.518648	2.56113e-12	7.61552e-08
1312	Adat2
1313	Adat3																															AVR	0.558	0.61	-0.186452	0.000520195	1	PCEC1	0.528	0.648	0.0245498	1.12705e-15	3.35127e-11	PCEC2	0.892	0.572	-0.112131	5.48206e-45	1.63009e-40
1314	Adck1																															AVR	0.141	0.208	0.108594	0.000301944	1	PCEC1	0.16	0.225	0.0839353	3.93488e-08	0.00117004	PCEC2	0.38	0.181	-0.539052	1.03068e-26	3.06473e-22
1315	Adck2																															AVR	0.191	0.244	-0.145633	0.00216818	1	PCEC1	0.171	0.277	-0.120133	1.07593e-17	3.19927e-13	PCEC2	0.532	0.205	-0.0868412	2.42695e-62	7.21655e-58
1316	Adck3	AA	0.353	0.171	0.544447	3.70983e-13	1.10312e-08																									AVR	0.129	0.183	-0.297227	0.000749212	1	PCEC1	0.128	0.206	-0.0601763	1.31747e-12	3.91749e-08	PCEC2	0.325	0.161	0.187353	8.90007e-20	2.64644e-15
1317	Adck4																															AVR	0.124	0.174	-0.0854861	0.00331554	1	PCEC1	0.129	0.191	-0.0435048	5.68384e-09	0.000169009	PCEC2	0.385	0.144	0.0384708	6.28001e-46	1.86736e-41
1318	Adck5																																					PCEC1	0.125	0.179	0.111628	1.71256e-06	0.050923	PCEC2	0.239	0.15	-0.382648	5.46333e-08	0.00162452
1319	Adcy10
1320	Adcy3																																											PCEC2	0.119	0.053	-0.110889	8.49294e-10	2.52538e-05
1321	Adcy4	AA	0.786	0.64	0.686312	3.21436e-12	9.55791e-08													EA	0.706	0.642	0.396224	0.00921211	1	DVR	0.688	0.643	0.20022	0.0028003	1	AVR	0.585	0.653	-0.0198126	0.000142543	1	PCEC1	0.554	0.699	-0.197582	1.71644e-29	5.10383e-25	PCEC2	0.915	0.616	0.102479	5.52624e-52	1.64323e-47
1322	Adcy5													GE2	0.011	0.003	0.0365734	0.00204394	1
1323	Adcy6	AA	0.349	0.184	0.661019	3.11217e-10	9.25405e-06							GE2	0.287	0.179	0.909969	4.91404e-11	1.46119e-06	EA	0.134	0.194	-0.38683	0.00245319	1							AVR	0.134	0.197	-0.580843	0.000119033	1	PCEC1	0.111	0.236	-0.821029	1.63877e-29	4.87288e-25	PCEC2	0.374	0.17	0.61705	1.68681e-30	5.01573e-26
1324	Adcy7																			EA	0.047	0.016	1.35833	2.64606e-05	0.786806	DVR	0.067	0.014	1.88681	2.1437e-13	6.37428e-09
1325	Adcy9																									DVR	0.092	0.052	1.17106	0.00112187	1							PCEC1	0.039	0.063	-0.532132	9.57308e-05	1
1326	Adcyap1r1																									DVR	0.036	0.017	0.0443971	0.00749162	1
1327	Add1													GE2	0.84	0.773	0.103495	0.000392374	1							DVR	0.738	0.782	-0.283693	0.00248482	1	AVR	0.723	0.786	-0.204006	5.48955e-06	0.163232	PCEC1	0.71	0.82	0.0295687	6.14875e-14	1.82833e-09	PCEC2	0.955	0.76	-0.166052	1.76274e-18	5.24151e-14
1328	Add2	AA	0.312	0.408	-3.0773	0.00012224	1	GE1	0.499	0.395	1.09228	2.50668e-12	7.4536e-08	GE2	0.497	0.393	0.737756	6.93591e-10	2.06239e-05	EA	0.326	0.409	-1.55697	3.43467e-05	1							AVR	0.301	0.416	-0.678342	1.00291e-09	2.98217e-05	PCEC1	0.345	0.438	-0.246159	2.75191e-12	8.1828e-08	PCEC2	0.611	0.381	-0.461555	1.27709e-21	3.79743e-17
1329	Add3													GE2	0.643	0.508	0.697062	4.82612e-16	1.43505e-11							DVR	0.398	0.531	-0.95091	1.52661e-09	4.53937e-05	AVR	0.437	0.532	-0.193538	7.41016e-07	0.0220341	PCEC1	0.431	0.575	-0.199748	4.82991e-24	1.43617e-19	PCEC2	0.812	0.49	-0.233831	3.02886e-37	9.00632e-33
1330	Adgra2	AA	0.186	0.101	0.847054	4.04806e-05	1																			DVR	0.209	0.097	0.907111	6.28203e-12	1.86796e-07	AVR	0.067	0.109	-1.55936	0.00126414	1	PCEC1	0.073	0.122	-0.54558	9.94323e-09	0.000295662
1331	Adgra3																																					PCEC1	0.061	0.102	-0.0343487	2.82723e-07	0.00840676	PCEC2	0.15	0.08	-0.0716006	3.41945e-08	0.00101677
1332	Adgrb1
1333	Adgrb3																																					PCEC1	0.053	0.079	-0.0153722	0.000383928	1
1334	Adgrd1																																											PCEC2	0.107	0.074	-0.748342	0.00550184	1
1335	Adgre1																																					PCEC1	0	0.005	-0.0088267	0.000929854	1
1336	Adgre4																																					PCEC1	0.001	0.008	-0.285527	0.000900037	1	PCEC2	0.014	0.004	0.964631	0.00171753	1
1337	Adgre5							GE1	0.996	0.944	0.879215	5.72767e-63	1.70312e-58	GE2	0.98	0.945	0.732641	1.46251e-61	4.34878e-57	EA	0.968	0.947	0.393322	1.9197e-11	5.70822e-07	DVR	0.936	0.949	-0.430609	5.37645e-07	0.0159869	AVR	0.943	0.949	-0.544472	1.76905e-16	5.26026e-12	PCEC1	0.915	0.967	-0.509166	6.61117e-57	1.96583e-52	PCEC2	0.996	0.943	-0.215617	0.00161715	1
1338	Adgrf2																																											PCEC2	0.007	0.001	0.0623268	0.00173325	1
1339	Adgrf5	AA	0.995	0.991	-0.260452	0.000259505	1	GE1	0.994	0.991	0.183874	3.23122e-06	0.0960802	GE2	0.995	0.991	0.16803	3.42638e-08	0.00101883	EA	0.997	0.991	0.14034	0.000354836	1	DVR	1	0.991	0.193265	8.96e-06	0.266426							PCEC1	0.984	0.995	-0.154985	4.24868e-14	1.26334e-09
1340	Adgrg1	AA	0.833	0.74	0.367871	5.58724e-08	0.00166137	GE1	0.72	0.746	-0.133305	0.0041593	1							EA	0.823	0.739	0.618678	1.70364e-11	5.06576e-07	DVR	0.844	0.737	0.677759	3.37301e-20	1.00296e-15	AVR	0.67	0.753	-0.420989	4.4921e-11	1.33573e-06	PCEC1	0.661	0.792	-0.232822	1.10298e-30	3.27972e-26	PCEC2	0.966	0.719	0.0217008	1.75715e-31	5.22488e-27
1341	Adgrg3																			EA	0.038	0.084	-1.81545	0.00198906	1
1342	Adgrg5																																											PCEC2	0.004	0	-0.00427619	0.00116686	1
1343	Adgrg6	AA	0.047	0.012	1.24829	1.35242e-05	0.402144																															PCEC1	0.006	0.018	-0.782138	0.000122384	1
1344	Adgrg7	AA	0.005	0	0.00776355	7.80799e-07	0.0232171
1345	Adgrl1													GE2	0.171	0.112	0.561033	3.55864e-05	1													AVR	0.081	0.122	-0.301091	0.00361476	1	PCEC1	0.076	0.142	-0.357876	6.93924e-13	2.06338e-08	PCEC2	0.224	0.106	0.179595	7.45453e-15	2.21661e-10
1346	Adgrl2	AA	0.521	0.569	-1.91249	1.73024e-06	0.0514488	GE1	0.627	0.562	0.634074	3.84024e-09	0.00011419	GE2	0.711	0.551	0.806117	4.35718e-25	1.29561e-20	EA	0.503	0.572	-0.296911	0.00128735	1	DVR	0.471	0.574	-0.994735	3.49222e-09	0.000103841	AVR	0.43	0.584	-0.404772	5.9677e-13	1.7745e-08	PCEC1	0.486	0.614	-0.213641	4.11568e-18	1.2238e-13	PCEC2	0.872	0.533	0.164098	3.56594e-46	1.06033e-41
1347	Adgrl4	AA	1	0.997	-0.872986	2.48972e-33	7.40317e-29	GE1	0.992	0.998	-0.664311	2.27639e-48	6.76886e-44	GE2	0.995	0.998	-0.707696	8.61505e-61	2.56168e-56	EA	1	0.997	0.378375	2.20198e-23	6.54758e-19							AVR	0.995	0.998	0.172301	5.21965e-12	1.55206e-07	PCEC1	0.998	0.997	0.226558	1.19921e-28	3.56584e-24
1348	Adh1																			EA	0.067	0.116	-1.61507	0.00389207	1
1349	Adh5	AA	0.707	0.619	0.30143	0.000227228	1																			DVR	0.68	0.618	0.205988	0.00916786	1	AVR	0.549	0.631	-0.161707	9.28419e-06	0.276065	PCEC1	0.547	0.666	-0.0123732	1.8629e-16	5.53935e-12	PCEC2	0.924	0.588	-0.119462	5.79098e-49	1.72195e-44
1350	Adh6b
1351	Adh7	AA	0.386	0.057	4.25942	3.0949e-85	9.20268e-81	GE1	0.037	0.073	-1.37715	0.00265505	1	GE2	0.043	0.073	-1.7676	0.00616251	1													AVR	0.038	0.074	-1.79794	0.000927251	1	PCEC1	0.032	0.092	-2.08936	9.89136e-18	2.9412e-13	PCEC2	0.188	0.057	-1.42231	5.10095e-30	1.51677e-25
1352	Adhfe1
1353	Adi1	AA	0.437	0.346	0.148893	0.00924764	1																			DVR	0.44	0.343	0.708245	1.84014e-06	0.0547165	AVR	0.282	0.358	0.0939007	0.00125686	1	PCEC1	0.283	0.388	-0.0454949	2.54808e-12	7.57673e-08	PCEC2	0.553	0.327	-0.0467014	2.56556e-22	7.6287e-18
1354	Adipor1							GE1	0.882	0.906	-0.156015	0.000916869	1	GE2	0.899	0.904	-0.226451	0.00866011	1							DVR	0.933	0.902	0.190916	0.00334141	1													PCEC2	0.982	0.895	-0.230897	9.38104e-05	1
1355	Adipor2	AA	0.66	0.433	1.01621	4.11509e-19	1.22362e-14	GE1	0.402	0.446	-0.409457	0.00563097	1							EA	0.5	0.438	0.339355	0.00691437	1	DVR	0.741	0.421	1.94566	4.06008e-67	1.20726e-62	AVR	0.356	0.452	-0.40201	2.78618e-07	0.00828471	PCEC1	0.309	0.519	-1.09887	1.32349e-58	3.93539e-54	PCEC2	0.722	0.411	-0.503319	1.2157e-33	3.61488e-29
1356	Adk																			EA	0.247	0.201	0.949421	0.00631823	1							AVR	0.162	0.209	-0.39194	0.0044644	1	PCEC1	0.146	0.237	-0.476997	5.83523e-16	1.7351e-11	PCEC2	0.336	0.189	-0.119752	2.16308e-15	6.43193e-11
1357	Adm													GE2	0.355	0.201	1.44691	2.45928e-22	7.31266e-18	EA	0.154	0.221	-0.505943	0.00238711	1													PCEC1	0.135	0.263	-1.43594	1.65762e-31	4.92893e-27	PCEC2	0.416	0.194	-0.429403	1.11702e-31	3.32144e-27
1358	Adm2
1359	Adnp																																					PCEC1	0.136	0.186	-0.054946	4.55021e-06	0.1353	PCEC2	0.316	0.151	0.134909	1.93387e-22	5.75035e-18
1360	Adnp2													GE2	0.176	0.129	0.503862	0.00157217	1																			PCEC1	0.095	0.157	0.105867	6.15907e-10	1.8314e-05	PCEC2	0.259	0.12	-0.327171	1.30194e-18	3.87131e-14
1361	Ado																																					PCEC1	0.165	0.3	0.0648613	6.06383e-26	1.80308e-21	PCEC2	0.535	0.218	0.310441	1.0974e-56	3.2631e-52
1362	Adora1
1363	Adora2a							GE1	0.383	0.344	0.738155	0.00324051	1	GE2	0.456	0.335	0.604343	1.28443e-09	3.81927e-05	EA	0.206	0.357	-2.91231	2.22099e-10	6.60412e-06	DVR	0.27	0.353	-1.04707	4.98232e-05	1	AVR	0.299	0.353	0.0977041	0.00772869	1	PCEC1	0.269	0.393	-0.0935271	3.89942e-18	1.15949e-13	PCEC2	0.633	0.316	-0.119322	1.40906e-46	4.18983e-42
1364	Adora3																																					PCEC1	0.016	0.041	-0.133389	4.18807e-07	0.0124532	PCEC2	0.051	0.03	-0.0309683	0.008896	1
1365	Adpgk																															AVR	0.336	0.415	0.0893875	0.000416027	1	PCEC1	0.331	0.45	-0.0468402	1.81685e-14	5.4024e-10	PCEC2	0.716	0.372	-0.0711	2.62488e-48	7.80508e-44
1366	Adprh																															AVR	0.547	0.628	-0.0603268	7.08591e-05	1	PCEC1	0.568	0.649	0.158108	0.000151155	1	PCEC2	0.861	0.592	0.0927995	3.4712e-33	1.03216e-28
1367	Adprhl2																															AVR	0.306	0.417	-0.245386	7.83148e-08	0.00232869	PCEC1	0.351	0.436	0.268428	3.42219e-07	0.0101759	PCEC2	0.731	0.368	0.224093	1.06064e-62	3.15382e-58
1368	Adprm																															AVR	0.176	0.256	-0.0909359	2.31757e-05	0.689128	PCEC1	0.184	0.285	-0.054991	1.35542e-14	4.03035e-10	PCEC2	0.566	0.212	0.338072	4.25964e-73	1.26661e-68
1369	Adra1b																																					PCEC1	0.006	0.014	-0.0142809	0.00616285	1	PCEC2	0.025	0.01	0.0626948	0.000824991	1
1370	Adra2c	AA	0.028	0.004	1.58275	2.9552e-06	0.0878728																															PCEC1	0.001	0.008	-0.233389	0.000208672	1	PCEC2	0.029	0.003	-0.0629658	7.69813e-16	2.28904e-11
1371	Adrb2	AA	0.135	0.071	1.49398	0.000187076	1	GE1	0.035	0.077	-1.78821	0.000684986	1																			AVR	0.041	0.077	-0.183129	0.00184645	1	PCEC1	0.045	0.089	-0.431437	1.35039e-09	4.01537e-05	PCEC2	0.181	0.061	-0.403247	1.54413e-24	4.59148e-20
1372	Adrbk1	AA	0.47	0.369	0.124451	0.00378249	1																									AVR	0.32	0.379	-0.201447	0.00383789	1	PCEC1	0.28	0.426	-0.1838	2.43121e-23	7.22919e-19	PCEC2	0.684	0.338	0.437465	2.16124e-55	6.42645e-51
1373	Adrbk2							GE1	0.014	0.04	-0.985727	0.0054597	1
1374	Adrm1																																					PCEC1	0.525	0.641	0.0892419	6.09405e-08	0.00181207	PCEC2	0.834	0.572	-0.0761409	1.91756e-15	5.70186e-11
1375	Adsl																																					PCEC1	0.388	0.526	-0.0151379	6.93324e-18	2.0616e-13	PCEC2	0.743	0.445	-0.129201	1.51229e-39	4.49679e-35
1376	Adss																									DVR	0.552	0.483	0.464187	0.00131045	1							PCEC1	0.392	0.542	-0.11755	2.47967e-22	7.3733e-18	PCEC2	0.75	0.458	-0.073534	1.23189e-30	3.66303e-26
1377	Adtrp
1378	Aebp1																			EA	0.073	0.125	-2.04991	0.00267295	1	DVR	0.075	0.125	-1.52173	0.00355794	1							PCEC1	0.095	0.137	0.274783	1.49271e-05	0.443856	PCEC2	0.251	0.107	-0.0434075	3.91103e-23	1.16295e-18
1379	Aebp2																																					PCEC1	0.132	0.19	0.0213016	4.2427e-07	0.0126157	PCEC2	0.288	0.156	-0.170007	4.43331e-13	1.31825e-08
1380	Aen																															AVR	0.174	0.241	-0.115389	0.00051004	1	PCEC1	0.189	0.259	-0.110041	1.55233e-08	0.000461584	PCEC2	0.45	0.21	0.143862	4.9031e-37	1.45794e-32
1381	Aes	AA	0.823	0.66	0.450512	4.92802e-10	1.46535e-05	GE1	0.708	0.663	0.340133	0.00114418	1													DVR	0.741	0.662	0.257596	0.00055409	1	AVR	0.561	0.679	-0.375037	6.21019e-10	1.8466e-05	PCEC1	0.572	0.721	-0.156018	6.52436e-23	1.94002e-18	PCEC2	0.91	0.639	0.107159	2.72923e-29	8.11535e-25
1382	AF357399
1383	AF357425	AA	0.005	0	0.0409745	0.00881994	1
1384	AF529169
1385	Afap1																															AVR	0.198	0.265	-0.278563	0.000296345	1	PCEC1	0.223	0.277	0.165708	0.000102847	1	PCEC2	0.465	0.234	0.227778	1.06064e-31	3.1538e-27
1386	Afap1l1	AA	0.828	0.848	-0.682003	1.87814e-05	0.558466							GE2	0.889	0.843	0.222147	2.22623e-06	0.0661969							DVR	0.894	0.844	0.293241	3.50412e-06	0.104195							PCEC1	0.791	0.88	-0.110682	2.24692e-21	6.68121e-17	PCEC2	0.984	0.832	-0.10656	2.11173e-19	6.27922e-15
1387	Afap1l2	AA	0.823	0.546	1.33585	7.06896e-37	2.10196e-32							GE2	0.636	0.548	0.460092	2.91179e-08	0.000865821	EA	0.651	0.551	0.820448	2.75066e-11	8.1791e-07							AVR	0.454	0.569	-0.586004	3.88024e-13	1.15379e-08	PCEC1	0.42	0.636	-0.764021	1.30513e-67	3.8808e-63	PCEC2	0.859	0.523	-0.466115	1.40253e-45	4.17042e-41
1388	Aff1																									DVR	0.331	0.264	0.658197	0.00176247	1	AVR	0.201	0.276	-0.02796	0.000223893	1	PCEC1	0.208	0.303	-0.0404103	1.42695e-12	4.24304e-08	PCEC2	0.517	0.24	0.0191593	3.02227e-38	8.98673e-34
1389	Aff2	AA	0.056	0.019	0.0874239	0.0001856	1
1390	Aff3
1391	Aff4	AA	0.484	0.392	0.0594105	0.00719326	1																									AVR	0.334	0.403	-0.075059	0.00181789	1	PCEC1	0.336	0.43	0.0851074	3.03106e-10	9.01286e-06	PCEC2	0.62	0.37	0.12495	1.01864e-27	3.02892e-23
1392	Afg3l1																															AVR	0.194	0.244	-0.207875	0.00650848	1	PCEC1	0.194	0.265	0.155405	1.71049e-07	0.00508613	PCEC2	0.458	0.214	-0.025387	3.17256e-34	9.43359e-30
1393	Afg3l2																																					PCEC1	0.22	0.306	-0.0184665	1.35311e-10	4.02348e-06	PCEC2	0.432	0.257	-0.347037	5.35521e-16	1.59237e-11
1394	Afm
1395	Afmid																																											PCEC2	0.047	0.027	-0.0856538	0.0086644	1
1396	Aftph																																					PCEC1	0.176	0.295	-0.210323	9.82575e-22	2.92169e-17	PCEC2	0.526	0.221	0.222966	2.95047e-52	8.77322e-48
1397	Aga	AA	0.414	0.327	0.420379	0.00320465	1																									AVR	0.277	0.336	-0.195702	0.0020291	1	PCEC1	0.264	0.368	0.162746	1.97758e-11	5.88034e-07	PCEC2	0.57	0.303	-0.138414	1.93457e-30	5.75244e-26
1398	Agap1																															AVR	0.083	0.13	-0.605627	0.000925935	1	PCEC1	0.099	0.14	-0.0335252	1.71865e-05	0.511039	PCEC2	0.226	0.114	0.152456	7.5313e-14	2.23943e-09
1399	Agap2
1400	Agap3																																					PCEC1	0.124	0.213	0.206419	2.93909e-15	8.7394e-11	PCEC2	0.369	0.159	-0.127844	2.95367e-31	8.78273e-27
1401	Agbl2													GE2	0.063	0.034	0.0671833	0.000516995	1																			PCEC1	0.028	0.042	-0.029035	0.00719082	1
1402	Agbl3																																											PCEC2	0.146	0.099	0.0201676	0.000589241	1
1403	Agbl5																															AVR	0.664	0.737	-0.206844	0.000578991	1	PCEC1	0.683	0.757	-0.0652848	8.9585e-07	0.0266381	PCEC2	0.888	0.712	0.23474	5.49584e-14	1.63419e-09
1404	Ager
1405	Agfg1																																					PCEC1	0.152	0.255	-0.293914	4.54592e-18	1.35173e-13	PCEC2	0.456	0.19	0.345167	3.20962e-44	9.54382e-40
1406	Agfg2							GE1	0.141	0.091	0.891338	0.000168064	1																			AVR	0.062	0.099	-0.282745	0.00331023	1	PCEC1	0.065	0.113	-0.589745	4.10267e-09	0.000121993	PCEC2	0.161	0.088	-0.0538788	4.34902e-08	0.00129318
1407	Aggf1	AA	0.786	0.464	1.86466	2.69675e-47	8.01878e-43													EA	0.419	0.481	-0.377652	0.0045717	1							AVR	0.425	0.483	-0.0839227	0.00625242	1	PCEC1	0.385	0.53	-0.37125	3.26297e-25	9.70245e-21	PCEC2	0.77	0.444	-0.15856	8.94948e-39	2.66113e-34
1408	Agk																																					PCEC1	0.247	0.352	-0.0783006	8.18759e-14	2.43458e-09	PCEC2	0.533	0.289	-0.361329	1.32405e-27	3.93707e-23
1409	Agl							GE1	0.164	0.229	-0.153339	0.00113408	1	GE2	0.273	0.217	0.397701	0.00502429	1																			PCEC1	0.165	0.256	-0.296696	4.85564e-15	1.44383e-10	PCEC2	0.318	0.212	0.234829	6.44436e-09	0.000191623
1410	Agmat							GE1	0.002	0	0.00418112	0.0013242	1
1411	Agmo							GE1	0.112	0.186	-1.46673	1.7756e-05	0.527975													DVR	0.292	0.171	1.48153	2.48718e-11	7.39562e-07							PCEC1	0.129	0.208	-0.293705	8.30762e-13	2.47027e-08	PCEC2	0.36	0.159	-0.198341	1.69803e-29	5.04908e-25
1412	Ago1																															AVR	0.048	0.079	-0.574568	0.00684744	1	PCEC1	0.059	0.085	-0.275674	0.000421164	1	PCEC2	0.145	0.068	0.512047	1.34987e-10	4.01383e-06
1413	Ago2																																					PCEC1	0.162	0.245	-0.317259	2.29894e-12	6.83591e-08	PCEC2	0.354	0.199	0.148428	5.06008e-16	1.50462e-11
1414	Ago3																																					PCEC1	0.129	0.174	0.173814	4.35505e-05	1	PCEC2	0.244	0.148	-0.0891783	2.28509e-08	0.000679471
1415	Ago4																																					PCEC1	0.063	0.088	0.180801	0.00185636	1	PCEC2	0.132	0.073	0.287079	9.37219e-07	0.0278682
1416	Agpat1	AA	0.809	0.514	0.221662	2.46001e-29	7.31483e-25	GE1	0.464	0.532	-0.185068	0.00053305	1	GE2	0.451	0.534	-0.502508	5.51066e-07	0.016386							DVR	0.841	0.504	0.859699	1.03024e-61	3.06342e-57	AVR	0.417	0.539	-0.234539	3.50136e-09	0.000104113	PCEC1	0.422	0.585	-0.0746564	3.45834e-32	1.02834e-27	PCEC2	0.776	0.498	-0.0027084	3.78521e-25	1.12553e-20
1417	Agpat2																									DVR	0.276	0.216	0.560279	0.00313307	1							PCEC1	0.156	0.257	-0.0945405	1.03675e-16	3.08279e-12	PCEC2	0.403	0.2	0.0709672	6.32611e-26	1.88107e-21
1418	Agpat3																															AVR	0.301	0.377	-0.139118	0.000336952	1	PCEC1	0.312	0.401	0.0624545	5.59702e-09	0.000166427	PCEC2	0.606	0.342	-0.178685	4.16682e-29	1.239e-24
1419	Agpat4	AA	0.619	0.485	0.457519	7.59953e-06	0.225972	GE1	0.542	0.485	0.514608	0.000408058	1																			AVR	0.403	0.501	-0.367348	9.06896e-07	0.0269666	PCEC1	0.407	0.538	-0.108797	3.53585e-20	1.05138e-15	PCEC2	0.741	0.462	-0.146281	8.48118e-32	2.52188e-27
1420	Agpat5																			EA	0.137	0.197	-0.648308	0.00718626	1							AVR	0.148	0.198	0.151481	0.00687944	1	PCEC1	0.14	0.223	-0.0115896	3.8347e-13	1.14025e-08	PCEC2	0.439	0.165	0.0888192	2.93952e-51	8.74066e-47
1421	Agpat6																															AVR	0.515	0.567	-0.084591	0.00263053	1	PCEC1	0.491	0.602	0.212042	4.01809e-10	1.19478e-05	PCEC2	0.843	0.53	-0.394999	1.81113e-37	5.3854e-33
1422	Agpat9																																											PCEC2	0.018	0.006	0.47096	0.000875599	1
1423	Agps																															AVR	0.148	0.197	-0.235157	0.00400671	1	PCEC1	0.148	0.216	0.0929606	2.01846e-08	0.00060019	PCEC2	0.353	0.173	-0.112577	8.4884e-22	2.52402e-17
1424	Agrn	AA	0.572	0.474	0.313895	0.000125461	1																									AVR	0.403	0.487	-0.280519	9.52109e-06	0.28311	PCEC1	0.411	0.516	0.0239308	1.2213e-11	3.63153e-07	PCEC2	0.734	0.449	-0.252614	1.00013e-29	2.9739e-25
1425	Agtpbp1							GE1	0.095	0.167	-0.917025	3.24118e-05	0.963765																									PCEC1	0.127	0.18	0.534754	8.71154e-07	0.0259038	PCEC2	0.273	0.148	-0.52965	9.85788e-14	2.93124e-09
1426	Agtr1a													GE2	0.048	0.024	0.356665	0.00105482	1	EA	0.049	0.025	-0.0672133	0.00728638	1													PCEC1	0.016	0.033	-0.0281687	8.53184e-05	1
1427	Agtr1b													GE2	0.002	0	0.422095	0.00300224	1
1428	Agtr2
1429	Agtrap																															AVR	0.253	0.32	-0.548507	0.000241586	1	PCEC1	0.275	0.335	0.167053	0.000263414	1	PCEC2	0.49	0.293	-0.359767	2.15722e-17	6.4145e-13
1430	Agxt2
1431	Ahctf1													GE2	0.612	0.541	0.190039	0.0033951	1																			PCEC1	0.436	0.612	-0.199503	8.32846e-33	2.47647e-28	PCEC2	0.81	0.518	-0.0573056	6.51703e-33	1.93784e-28
1432	Ahcy																																					PCEC1	0.08	0.118	0.0916607	1.68002e-05	0.499554	PCEC2	0.188	0.095	-0.231858	1.27125e-10	3.78005e-06
1433	Ahcyl1													GE2	0.275	0.225	0.400671	0.00396347	1													AVR	0.165	0.238	-0.300708	8.59162e-05	1	PCEC1	0.188	0.255	0.000291856	7.26775e-08	0.00216107	PCEC2	0.396	0.212	-0.0444747	6.13759e-21	1.82501e-16
1434	Ahcyl2																																					PCEC1	0.087	0.137	0.00901364	6.46275e-08	0.0019217	PCEC2	0.269	0.102	0.729592	3.3207e-31	9.87411e-27
1435	Ahi1																									DVR	0.139	0.089	0.79008	0.00055332	1							PCEC1	0.056	0.112	-0.312241	5.06927e-12	1.50735e-07	PCEC2	0.199	0.08	0.195024	1.28587e-19	3.82354e-15
1436	Ahnak	AA	0.874	0.734	0.472075	2.33475e-13	6.94237e-09	GE1	0.598	0.754	-0.834923	2.00343e-20	5.9572e-16	GE2	0.722	0.742	-0.650123	1.01949e-07	0.00303144	EA	0.849	0.733	0.64582	2.69111e-17	8.00201e-13													PCEC1	0.673	0.779	0.0993909	4.01507e-12	1.19388e-07	PCEC2	0.96	0.715	0.153838	2.59216e-36	7.7078e-32
1437	Ahnak2	AA	0.112	0.044	1.76596	1.66088e-06	0.0493862													EA	0.084	0.044	0.900436	0.000471691	1	DVR	0.109	0.042	1.53105	2.90324e-09	8.63279e-05							PCEC1	0.02	0.062	-1.61401	9.50469e-13	2.82622e-08	PCEC2	0.09	0.042	-0.751772	3.92839e-07	0.0116811
1438	Ahr																			EA	0.267	0.214	0.608998	0.00724108	1													PCEC1	0.168	0.246	-0.134705	1.96853e-10	5.85342e-06	PCEC2	0.362	0.201	-0.265644	5.13029e-16	1.52549e-11
1439	Ahrr																																					PCEC1	0.053	0.074	-0.135944	0.00264054	1
1440	Ahsa1	AA	0.707	0.58	0.285699	0.000243185	1																									AVR	0.525	0.592	-0.0792325	0.000515866	1	PCEC1	0.479	0.646	-0.141578	5.97906e-27	1.77787e-22	PCEC2	0.89	0.55	0.167634	7.76897e-54	2.3101e-49
1441	Ahsa2																															AVR	0.308	0.377	0.0322636	0.00279547	1	PCEC1	0.278	0.423	-0.128657	1.3534e-22	4.02433e-18	PCEC2	0.685	0.335	0.307905	1.5844e-53	4.71122e-49
1442	AI115009	AA	0.023	0.001	0.318097	6.10512e-14	1.81536e-09
1443	AI314180																																					PCEC1	0.22	0.293	0.22848	1.45957e-07	0.00434003	PCEC2	0.423	0.249	-0.14978	6.49672e-16	1.9318e-11
1444	AI317395																																					PCEC1	0.004	0.011	0.101937	0.00443516	1
1445	AI413582																			EA	0.273	0.353	-0.240018	0.00255224	1							AVR	0.291	0.355	-0.22434	0.00361754	1	PCEC1	0.294	0.379	0.179141	6.00331e-07	0.0178508	PCEC2	0.633	0.316	0.252798	1.39788e-43	4.1566e-39
1446	AI429214																									DVR	0.019	0.005	0.347967	0.000313761	1
1447	AI467606	AA	0.391	0.239	1.12784	2.1064e-08	0.000626337													EA	0.291	0.242	0.826875	0.00767451	1							AVR	0.174	0.254	-0.363953	5.93098e-06	0.176358	PCEC1	0.171	0.288	-0.556791	1.41833e-21	4.21739e-17	PCEC2	0.49	0.218	-0.233074	4.07007e-43	1.21023e-38
1448	AI480526																															AVR	0.057	0.092	-0.144702	0.00471565	1							PCEC2	0.141	0.082	-0.270501	6.9698e-06	0.207247
1449	AI593442																			EA	0.009	0.002	0.0185686	0.00753849	1
1450	AI597479																																					PCEC1	0.132	0.191	0.050906	1.2713e-07	0.0037802	PCEC2	0.304	0.154	-0.354046	1.01463e-17	3.01701e-13
1451	AI606181	AA	0.033	0.011	0.427145	0.00427395	1																															PCEC1	0.004	0.017	-0.0836579	1.48781e-05	0.442399
1452	AI606473																																											PCEC2	0.004	0	0.0465052	2.50474e-05	0.744783
1453	AI607873													GE2	0.131	0.075	0.623794	2.69106e-06	0.0800188																			PCEC1	0.06	0.093	-0.822043	1.37653e-05	0.409313
1454	AI661453							GE1	0.014	0.004	0.419494	0.003481	1
1455	AI662270	AA	0.256	0.16	0.990356	3.99341e-05	1							GE2	0.214	0.158	0.463752	0.000542212	1													AVR	0.105	0.171	-0.247853	4.99863e-05	1	PCEC1	0.126	0.186	-0.221557	1.16399e-08	0.000346111	PCEC2	0.255	0.154	-0.527708	1.96947e-08	0.000585621
1456	AI837181																															AVR	0.115	0.161	-0.505952	0.00286699	1	PCEC1	0.111	0.182	-0.294869	2.70594e-12	8.04613e-08	PCEC2	0.293	0.141	0.321941	6.25922e-20	1.86118e-15
1457	AI838599	AA	0.237	0.167	0.632766	0.00406303	1																															PCEC1	0.143	0.185	-0.0276387	0.000244346	1
1458	AI846148																																					PCEC1	0.06	0.101	0.0789871	2.91759e-07	0.00867545	PCEC2	0.141	0.08	-0.614855	2.53858e-06	0.0754847
1459	AI847159																									DVR	0.019	0.006	0.0147016	0.00520396	1
1460	AI849053	AA	0.009	0.001	0.019126	0.000792169	1
1461	AI854703																																					PCEC1	0.004	0.012	-0.293686	0.00318773	1	PCEC2	0.027	0.007	-0.224917	1.79039e-06	0.0532372
1462	AI987944	AA	0.219	0.133	0.51612	0.000365738	1																									AVR	0.096	0.142	-0.0171566	0.0024971	1	PCEC1	0.1	0.158	-0.0168076	1.06789e-08	0.000317537	PCEC2	0.251	0.124	-0.0305384	3.14381e-16	9.34811e-12
1463	Aicda
1464	Aida	AA	0.591	0.42	0.582981	5.11408e-08	0.00152067																															PCEC1	0.351	0.47	-0.0674871	3.12742e-13	9.29938e-09	PCEC2	0.624	0.405	0.224964	1.28258e-16	3.81376e-12
1465	Aif1l							GE1	0.207	0.312	-1.31664	2.27268e-07	0.0067578							EA	0.584	0.284	2.7885	9.38119e-58	2.7895e-53							AVR	0.212	0.314	-1.30406	4.6374e-09	0.000137893	PCEC1	0.189	0.368	-1.80555	1.01617e-48	3.02159e-44	PCEC2	0.618	0.267	0.013642	1.03949e-68	3.09093e-64
1466	Aifm1																																					PCEC1	0.28	0.37	0.0710692	4.04576e-10	1.20301e-05	PCEC2	0.608	0.306	-0.0715883	2.45799e-40	7.30883e-36
1467	Aifm2																			EA	0.11	0.17	-0.256645	0.00450674	1	DVR	0.114	0.17	-0.692038	0.00465296	1	AVR	0.105	0.174	-0.116165	3.7271e-05	1	PCEC1	0.128	0.189	0.0248036	2.32961e-08	0.00069271	PCEC2	0.392	0.141	0.389134	5.19515e-48	1.54478e-43
1468	Aifm3	AA	0.014	0.001	-0.062294	1.04944e-06	0.031205
1469	Aig1							GE1	0.362	0.465	-0.756029	9.14422e-08	0.00271903	GE2	0.415	0.46	-1.04324	0.000184606	1													AVR	0.406	0.461	-0.0919203	0.00843856	1							PCEC2	0.694	0.429	0.123117	5.84964e-33	1.73939e-28
1470	Aim1	AA	0.181	0.113	0.915075	0.000797324	1	GE1	0.039	0.123	-1.66941	2.53252e-08	0.000753044													DVR	0.195	0.11	1.17131	1.4801e-07	0.00440109	AVR	0.083	0.119	-0.434894	0.00791755	1	PCEC1	0.085	0.133	-0.0812702	9.87124e-08	0.00293521	PCEC2	0.222	0.103	-0.122843	2.20602e-16	6.5596e-12
1471	Aim1l																																					PCEC1	0.125	0.191	-0.0819018	5.92903e-09	0.0001763	PCEC2	0.25	0.157	0.200211	3.87487e-08	0.00115219
1472	Aimp1																																					PCEC1	0.306	0.44	-0.126205	1.47992e-18	4.40053e-14	PCEC2	0.703	0.356	0.283703	7.39661e-47	2.19938e-42
1473	Aimp2																															AVR	0.231	0.288	-0.21408	0.00194508	1	PCEC1	0.214	0.322	0.0227472	1.23233e-15	3.66434e-11	PCEC2	0.541	0.253	0.0751425	2.99396e-43	8.90253e-39
1474	Aip																									DVR	0.682	0.649	0.153615	0.00693513	1	AVR	0.57	0.661	-0.0190151	0.000111698	1	PCEC1	0.581	0.692	0.0142549	8.37679e-14	2.49084e-09	PCEC2	0.901	0.623	-0.142644	1.54013e-26	4.57959e-22
1475	Aipl1	AA	0.028	0.003	0.549696	4.48093e-08	0.0013324
1476	Airn							GE1	0.056	0.111	-1.67374	0.000132367	1																															PCEC2	0.195	0.096	-0.0085016	1.65154e-12	4.91084e-08
1477	Ajuba																									DVR	0.097	0.05	0.748054	5.8794e-05	1							PCEC1	0.032	0.065	-0.405082	2.24138e-07	0.00666475	PCEC2	0.15	0.042	0.827359	3.44045e-27	1.02302e-22
1478	AK010878													GE2	0.275	0.229	0.392961	0.00725207	1																			PCEC1	0.168	0.271	-0.238496	1.09601e-15	3.25899e-11	PCEC2	0.436	0.211	0.2333	1.40253e-27	4.17044e-23
1479	Ak1																									DVR	0.111	0.204	-1.11502	1.73083e-05	0.514662	AVR	0.148	0.204	-0.316409	0.000821786	1	PCEC1	0.166	0.216	0.216961	6.0863e-05	1	PCEC2	0.34	0.182	-0.405625	1.41588e-16	4.21011e-12
1480	AK157302																									DVR	0.304	0.181	0.377973	4.27458e-09	0.000127105							PCEC1	0.153	0.209	0.00152233	8.37099e-06	0.248911
1481	Ak2																																					PCEC1	0.235	0.307	0.0520446	8.03881e-08	0.00239034	PCEC2	0.494	0.257	0.00558957	6.85587e-30	2.03859e-25
1482	Ak3																			EA	0.634	0.581	0.666393	0.00011185	1	DVR	0.649	0.58	0.669893	1.79419e-06	0.0533502	AVR	0.508	0.593	-0.185454	8.0806e-07	0.0240277	PCEC1	0.493	0.636	-0.12234	7.15226e-21	2.12672e-16	PCEC2	0.87	0.552	-0.148764	4.98637e-39	1.4827e-34
1483	Ak4	AA	0.042	0.016	-0.450374	0.00388	1																																					PCEC2	0.034	0.015	-0.0779035	0.000705645	1
1484	Ak5	AA	0.06	0.011	1.7488	1.66427e-10	4.94871e-06
1485	Ak6													GE2	0.522	0.456	0.139492	0.00285761	1																			PCEC1	0.38	0.51	-0.028379	6.33463e-15	1.8836e-10	PCEC2	0.687	0.437	-0.0435877	2.96647e-18	8.82079e-14
1486	Ak8																																					PCEC1	0.001	0.007	-0.188658	0.00221125	1	PCEC2	0.02	0.003	-0.102596	5.36299e-08	0.00159468
1487	Ak9
1488	Akap1																															AVR	0.124	0.174	-0.197405	0.00220175	1	PCEC1	0.135	0.188	0.218432	4.35004e-06	0.129348	PCEC2	0.316	0.152	0.0382547	1.26595e-20	3.76431e-16
1489	Akap10													GE2	0.293	0.243	0.266722	0.00914866	1																			PCEC1	0.18	0.287	-0.209458	1.70987e-16	5.08431e-12	PCEC2	0.492	0.221	0.376396	3.89397e-40	1.15787e-35
1490	Akap11																															AVR	0.169	0.227	-0.0291857	0.00218929	1	PCEC1	0.169	0.251	-0.117818	6.88582e-11	2.0475e-06	PCEC2	0.387	0.202	0.0249827	4.28391e-21	1.27382e-16
1491	Akap12													GE2	0.566	0.507	0.253905	0.00235275	1	EA	0.448	0.517	-0.461182	0.00755986	1	DVR	0.465	0.516	-0.541913	0.00128799	1							PCEC1	0.439	0.555	-0.0476132	1.38684e-13	4.12378e-09	PCEC2	0.832	0.477	0.226884	2.75791e-49	8.20066e-45
1492	Akap13													GE2	0.77	0.707	0.242592	1.17503e-06	0.0349396	EA	0.756	0.711	0.410979	2.82125e-05	0.838899													PCEC1	0.635	0.759	-0.138907	7.67051e-22	2.28083e-17	PCEC2	0.929	0.689	0.0610409	1.15398e-23	3.43136e-19
1493	Akap14													GE2	0.031	0.015	0.0417093	0.00611111	1
1494	Akap17b																																											PCEC2	0.074	0.038	-0.367273	9.1743e-05	1
1495	Akap2							GE1	0.88	0.878	-0.357052	5.01957e-06	0.149257													DVR	0.922	0.875	0.455748	7.70844e-13	2.2921e-08							PCEC1	0.835	0.903	0.0778	1.27685e-06	0.0379672	PCEC2	0.989	0.866	-0.0390104	1.97008e-20	5.85804e-16
1496	Akap5																			EA	0.224	0.151	0.184199	0.00014306	1													PCEC1	0.103	0.185	-0.191047	3.19052e-16	9.487e-12	PCEC2	0.233	0.147	0.186499	5.33403e-09	0.000158607
1497	Akap6
1498	Akap7							GE1	0.077	0.137	-0.793105	0.000124255	1																									PCEC1	0.106	0.147	-0.080868	4.92052e-05	1	PCEC2	0.23	0.121	-0.22358	7.41559e-12	2.20502e-07
1499	Akap8																															AVR	0.434	0.51	0.0315025	0.000642393	1	PCEC1	0.411	0.555	-0.180234	3.12704e-19	9.29825e-15	PCEC2	0.812	0.467	0.00298656	1.34849e-44	4.00973e-40
1500	Akap8l							GE1	0.402	0.464	-0.59885	0.00102101	1																									PCEC1	0.382	0.503	-0.0487989	1.22496e-14	3.64243e-10	PCEC2	0.741	0.427	0.319271	5.3561e-44	1.59264e-39
1501	Akap9							GE1	0.429	0.482	-0.149626	0.00445862	1							EA	0.538	0.473	0.390238	0.00162249	1							AVR	0.411	0.485	0.0185253	0.00220318	1	PCEC1	0.416	0.513	-0.128991	8.35534e-11	2.48446e-06	PCEC2	0.687	0.454	-0.0891753	3.29977e-19	9.81188e-15
1502	Akip1																			EA	0.102	0.185	-0.804428	8.65899e-05	1													PCEC1	0.151	0.195	0.216885	0.000168193	1	PCEC2	0.304	0.165	0.0439719	9.77887e-15	2.90775e-10
1503	Akirin1																															AVR	0.458	0.529	0.119074	0.00239009	1	PCEC1	0.438	0.569	-0.00323782	2.27473e-16	6.76391e-12	PCEC2	0.763	0.494	-0.387928	1.01784e-23	3.02656e-19
1504	Akirin1-ps
1505	Akirin2																																					PCEC1	0.204	0.295	-0.121966	3.2417e-12	9.6392e-08	PCEC2	0.47	0.239	0.00411063	1.51202e-26	4.49599e-22
1506	Akna																			EA	0.166	0.231	-0.182822	0.00955417	1													PCEC1	0.204	0.24	-0.139748	0.0038105	1	PCEC2	0.333	0.215	0.0713928	1.72965e-09	5.14311e-05
1507	Aknaos
1508	Akr1a1							GE1	0.99	0.985	0.110997	0.0024682	1																			AVR	0.974	0.987	-0.165002	6.70679e-06	0.199426	PCEC1	0.982	0.988	0.154704	6.51431e-06	0.193703
1509	Akr1b10																															AVR	0.146	0.201	-0.331085	0.00161522	1	PCEC1	0.159	0.216	0.261867	2.40933e-06	0.0716415	PCEC2	0.383	0.174	0.124031	2.46438e-31	7.32784e-27
1510	Akr1b3																									DVR	0.788	0.648	1.62031	1.01769e-32	3.02611e-28							PCEC1	0.543	0.722	-0.434044	1.41718e-32	4.21398e-28	PCEC2	0.911	0.628	-0.127703	3.47055e-24	1.03197e-19
1511	Akr1b7																									DVR	0.033	0.008	0.613657	2.97911e-06	0.0885838
1512	Akr1b8																									DVR	0.039	0.007	1.42904	6.6206e-10	1.96863e-05
1513	Akr1c12
1514	Akr1c13							GE1	0.083	0.048	0.778813	0.000677245	1	GE2	0.086	0.047	0.837747	5.38787e-05	1													AVR	0.024	0.054	-1.01713	0.00151234	1	PCEC1	0.038	0.059	-0.155508	0.000866434	1
1515	Akr1c14	AA	0.567	0.467	0.240697	0.00244907	1	GE1	0.348	0.483	-0.666295	3.94082e-12	1.1718e-07	GE2	0.433	0.476	-0.722754	0.000326288	1							DVR	0.694	0.456	1.20118	2.5759e-36	7.65943e-32	AVR	0.411	0.478	0.0200865	0.00110147	1	PCEC1	0.373	0.528	-0.126267	3.87757e-24	1.15299e-19	PCEC2	0.807	0.434	0.113584	5.74999e-59	1.70976e-54
1516	Akr1c18	AA	0.005	0	0.0029094	0.00884809	1
1517	Akr1c19																									DVR	0.017	0.005	0.355682	0.00390083	1							PCEC1	0.002	0.008	-0.16339	0.00184664	1
1518	Akr1c21
1519	Akr1d1	AA	0.051	0.016	0.0507361	0.000111599	1																															PCEC1	0.01	0.022	-0.0320963	0.00162644	1
1520	Akr1e1																																					PCEC1	0.156	0.222	0.236739	3.63129e-07	0.0107976	PCEC2	0.329	0.183	-0.542506	6.90148e-15	2.05215e-10
1521	Akr7a5																															AVR	0.189	0.31	-0.446362	5.31123e-10	1.57929e-05	PCEC1	0.234	0.334	0.127196	7.36521e-13	2.19005e-08	PCEC2	0.584	0.265	0.202317	1.16605e-55	3.46726e-51
1522	Akt1																															AVR	0.282	0.338	-0.193062	0.00615842	1	PCEC1	0.27	0.368	0.16249	1.12427e-10	3.34301e-06	PCEC2	0.552	0.307	-0.202261	6.8417e-28	2.03438e-23
1523	Akt1s1																															AVR	0.33	0.397	-0.215422	0.000531771	1	PCEC1	0.314	0.434	-0.0641169	5.37361e-15	1.59784e-10	PCEC2	0.7	0.355	0.0346517	5.49616e-49	1.63428e-44
1524	Akt2																																					PCEC1	0.163	0.217	0.0596327	4.27059e-06	0.126986	PCEC2	0.331	0.182	-0.186077	7.23898e-16	2.15251e-11
1525	Akt3													GE2	0.336	0.275	0.341822	0.0014545	1																			PCEC1	0.217	0.317	-0.147903	6.75105e-14	2.00743e-09	PCEC2	0.476	0.259	0.128882	1.87874e-22	5.58642e-18
1526	Aktip																															AVR	0.368	0.487	-0.0719331	4.81842e-07	0.0143276	PCEC1	0.382	0.528	0.0339504	3.95851e-22	1.17706e-17	PCEC2	0.763	0.442	-0.0553654	5.85103e-39	1.7398e-34
1527	AL450395.1
1528	AL589651.2							GE1	0.004	0	0.00528142	0.00372681	1
1529	AL589651.3
1530	AL589651.4
1531	AL589742.1																									DVR	0.206	0.098	0.159714	3.47746e-10	1.03402e-05							PCEC1	0.085	0.117	-0.0191847	0.00062157	1
1532	AL589742.2	AA	0.06	0.026	0.0324343	0.00233082	1																															PCEC1	0.019	0.032	-0.0165131	0.0059129	1
1533	AL589845.1																			EA	0.006	0.001	0.0194236	0.00191125	1
1534	AL590388.1
1535	AL590388.2							GE1	0.006	0.001	0.0273308	0.00955573	1
1536	AL590614.2
1537	AL596185.1																																											PCEC2	0.016	0.006	0.167997	0.00693507	1
1538	AL596383.1																																											PCEC2	0.018	0.006	0.0177382	0.00126524	1
1539	AL603834.1
1540	AL603913.1																			EA	0.253	0.117	0.576696	1.25986e-13	3.74618e-09	DVR	0.173	0.122	0.230021	0.00557421	1							PCEC1	0.086	0.149	-0.105711	5.48944e-11	1.63228e-06	PCEC2	0.192	0.118	0.177115	1.81543e-06	0.0539817
1541	AL606464.1																									DVR	0.061	0.03	0.0316176	0.00126583	1
1542	AL626808.1																															AVR	0.003	0.031	-0.0479341	0.000131346	1							PCEC2	0.06	0.025	0.0764547	2.17567e-06	0.0646935
1543	AL662809.1													GE2	0.278	0.332	-0.251738	0.0055635	1							DVR	0.457	0.317	0.415057	6.36602e-09	0.000189294							PCEC1	0.291	0.347	-0.0108504	0.000578246	1	PCEC2	0.454	0.312	0.199799	1.99911e-08	0.000594436
1544	AL663030.1													GE2	0.072	0.04	0.353013	0.000461677	1																			PCEC1	0.026	0.053	-0.169929	2.20805e-06	0.0656564	PCEC2	0.083	0.039	0.151041	2.14082e-06	0.0636572
1545	AL670236.1																																					PCEC1	0.011	0.024	-0.290382	0.000859295	1	PCEC2	0.069	0.014	0.800092	4.29342e-19	1.27665e-14
1546	AL672049.1																									DVR	0.162	0.102	0.320686	0.00047013	1							PCEC1	0.073	0.126	-0.218596	2.8218e-09	8.39061e-05	PCEC2	0.184	0.098	0.345435	2.35995e-09	7.0173e-05
1547	AL772271.1																																											PCEC2	0.061	0.029	0.286745	4.1352e-05	1
1548	AL772372.1							GE1	0.056	0.092	-0.848581	0.00639866	1							EA	0.041	0.092	-1.15715	0.000823272	1																			PCEC2	0.161	0.081	0.0582928	1.79603e-09	5.3405e-05
1549	AL844548.1																																					PCEC1	0.021	0.033	-0.0490125	0.00902083	1
1550	AL844846.1																			EA	0.015	0.003	0.0115458	0.00150151	1
1551	AL845457.1													GE2	0.257	0.184	0.15221	4.00277e-05	1																			PCEC1	0.141	0.22	-0.157915	1.88601e-11	5.60806e-07	PCEC2	0.257	0.184	0.329554	1.98736e-05	0.59094
1552	Alad							GE1	0.435	0.523	-0.436114	9.60546e-06	0.285618	GE2	0.463	0.521	-0.445837	9.42082e-05	1	EA	0.448	0.52	-0.506445	0.00124358	1							AVR	0.439	0.525	-0.196253	4.10983e-05	1							PCEC2	0.814	0.482	0.0940769	1.24814e-51	3.71135e-47
1553	Alas1	AA	0.54	0.387	0.842193	8.65401e-08	0.00257327																									AVR	0.341	0.399	0.136113	0.00286174	1	PCEC1	0.283	0.456	-0.387361	4.86962e-36	1.44798e-31	PCEC2	0.687	0.36	-0.0603401	1.07549e-45	3.19797e-41
1554	Alas2																																											PCEC2	0.043	0.013	-0.178902	1.0624e-07	0.00315904
1555	Alb
1556	Alcam	AA	0.065	0.013	1.64713	5.49791e-10	1.6348e-05																															PCEC1	0.007	0.02	-0.288545	0.000234063	1
1557	Aldh16a1																															AVR	0.274	0.345	-0.143827	0.000732316	1	PCEC1	0.285	0.368	0.0559112	3.29932e-08	0.000981053	PCEC2	0.523	0.317	0.153185	1.9036e-18	5.66035e-14
1558	Aldh18a1													GE2	0.068	0.105	-0.300439	0.00438067	1																			PCEC1	0.061	0.125	-0.366031	5.76807e-14	1.71514e-09	PCEC2	0.268	0.083	0.143202	3.77124e-42	1.12138e-37
1559	Aldh1a1
1560	Aldh1a2																																											PCEC2	0.024	0.002	0.377683	3.38869e-12	1.00763e-07
1561	Aldh1a3							GE1	0.07	0.11	-0.528296	0.00479486	1	GE2	0.144	0.103	-0.237519	0.00423578	1																			PCEC1	0.072	0.127	0.113205	9.36489e-10	2.78465e-05	PCEC2	0.166	0.1	-0.0805957	4.88667e-07	0.0145305
1562	Aldh1a7
1563	Aldh1b1																			EA	0.015	0.004	0.414868	0.00228634	1
1564	Aldh1l1																									DVR	0.05	0.026	0.707587	0.00662831	1
1565	Aldh1l2													GE2	0.031	0.015	0.914672	0.00709169	1
1566	Aldh2	AA	0.656	0.547	0.784913	1.48232e-06	0.0440769	GE1	0.509	0.555	-0.408335	0.00320604	1	GE2	0.496	0.557	-0.735018	2.11024e-05	0.62748													AVR	0.468	0.561	-0.400653	1.21986e-07	0.00362725							PCEC2	0.736	0.53	-0.428537	4.91933e-15	1.46276e-10
1567	Aldh3a1	AA	0.005	0	0.752843	0.000805068	1
1568	Aldh3a2																									DVR	0.44	0.51	-0.336485	0.00496089	1	AVR	0.435	0.514	0.00470901	0.000319559	1	PCEC1	0.445	0.54	0.114539	1.44276e-09	4.29003e-05	PCEC2	0.767	0.476	-0.172921	2.83745e-36	8.43717e-32
1569	Aldh3b1							GE1	0.308	0.252	0.426676	0.00258233	1																			AVR	0.191	0.265	-0.568624	3.30862e-05	0.983818	PCEC1	0.198	0.291	0.0278921	1.74802e-12	5.19775e-08	PCEC2	0.389	0.242	-0.476131	3.12414e-12	9.28964e-08
1570	Aldh3b2							GE1	0.002	0	0.0118156	0.0013242	1
1571	Aldh4a1																																					PCEC1	0.164	0.238	0.220721	2.26515e-09	6.73541e-05	PCEC2	0.4	0.19	0.326753	1.24904e-31	3.71403e-27
1572	Aldh5a1																																											PCEC2	0.071	0.029	0.379045	2.91494e-07	0.00866757
1573	Aldh6a1																																					PCEC1	0.274	0.381	0.164649	4.62624e-12	1.37561e-07	PCEC2	0.562	0.317	-0.319349	6.02629e-28	1.79192e-23
1574	Aldh7a1																															AVR	0.241	0.307	-0.148159	0.000823005	1	PCEC1	0.274	0.315	0.253489	0.00592558	1	PCEC2	0.448	0.284	-0.244218	1.63364e-14	4.85763e-10
1575	Aldh8a1							GE1	0.039	0.017	0.272887	0.000571302	1
1576	Aldh9a1																									DVR	0.348	0.28	0.761047	0.00102504	1	AVR	0.229	0.291	-0.514535	0.00024806	1	PCEC1	0.223	0.321	-0.0729038	2.1173e-13	6.29578e-09	PCEC2	0.474	0.263	-0.416566	2.1202e-23	6.30441e-19
1577	Aldoa							GE1	0.988	0.996	-0.355366	1.39296e-16	4.14197e-12	GE2	0.991	0.996	-0.454037	7.48075e-31	2.2244e-26	EA	0.994	0.995	-0.184553	0.000177976	1	DVR	0.997	0.995	0.350189	1.48703e-24	4.42168e-20	AVR	0.995	0.995	0.206469	6.81495e-11	2.02642e-06	PCEC1	0.997	0.994	0.164866	9.33012e-10	2.77431e-05
1578	Aldoart1							GE1	0.141	0.201	-0.0859175	0.00197427	1	GE2	0.156	0.2	-0.0922164	0.00848105	1							DVR	0.318	0.187	0.13126	1.32714e-08	0.000394626	AVR	0.255	0.188	0.0947129	0.00014101	1	PCEC1	0.172	0.209	-0.00302372	0.00541574	1
1579	Aldob							GE1	0.28	0.217	0.139166	0.00130702	1
1580	Aldoc													GE2	0.034	0.018	-0.152071	0.00757135	1																			PCEC1	0.012	0.023	0.0196001	0.00329878	1	PCEC2	0.038	0.017	0.280383	0.000590764	1
1581	Alg1																															AVR	0.298	0.376	-0.242924	6.19725e-05	1	PCEC1	0.32	0.396	0.160025	1.46339e-06	0.0435139	PCEC2	0.627	0.339	0.0753156	2.27289e-37	6.75844e-33
1582	Alg10b																																					PCEC1	0.067	0.092	0.296644	0.0021203	1	PCEC2	0.152	0.075	-0.141517	8.04461e-10	2.39207e-05
1583	Alg11																																					PCEC1	0.143	0.204	0.0537983	1.27748e-07	0.00379858	PCEC2	0.282	0.17	-0.140244	1.28377e-10	3.81729e-06
1584	Alg12																															AVR	0.145	0.246	-0.21248	3.76312e-08	0.00111896	PCEC1	0.18	0.266	-0.0539036	5.3046e-12	1.57732e-07	PCEC2	0.515	0.203	0.11929	8.49624e-59	2.52636e-54
1585	Alg13																																					PCEC1	0.18	0.215	0.585986	0.00670441	1	PCEC2	0.242	0.198	-0.461216	0.00479363	1
1586	Alg14	AA	0.512	0.399	0.222758	0.000872833	1																									AVR	0.344	0.41	-0.103315	0.00266438	1	PCEC1	0.317	0.452	-0.0688208	3.9336e-20	1.16966e-15	PCEC2	0.687	0.371	0.0854215	2.85827e-44	8.49906e-40
1587	Alg2																															AVR	0.246	0.312	0.00706292	0.000872202	1	PCEC1	0.24	0.342	-0.0517971	2.23766e-14	6.65368e-10	PCEC2	0.6	0.271	0.0769303	9.861e-57	2.93217e-52
1588	Alg3																															AVR	0.165	0.258	-0.429344	2.5909e-07	0.00770406	PCEC1	0.179	0.288	-0.0255955	9.39999e-18	2.79509e-13	PCEC2	0.519	0.217	0.345833	5.73698e-57	1.70589e-52
1589	Alg5	AA	0.507	0.405	0.255429	0.00229985	1	GE1	0.342	0.415	-0.213832	0.00219932	1																									PCEC1	0.34	0.448	0.0811541	1.32142e-11	3.92923e-07	PCEC2	0.703	0.375	0.13218	3.55507e-44	1.0571e-39
1590	Alg6							GE1	0.114	0.158	-0.563573	0.00972178	1																									PCEC1	0.118	0.176	0.113255	3.91813e-08	0.00116505	PCEC2	0.251	0.144	0.190663	4.93166e-11	1.46643e-06
1591	Alg8																															AVR	0.057	0.105	-0.27414	0.000306083	1	PCEC1	0.068	0.118	-0.193474	3.23585e-09	9.62179e-05	PCEC2	0.259	0.082	0.657642	2.93786e-39	8.73573e-35
1592	Alg9							GE1	0.081	0.127	0.236674	0.00328794	1																									PCEC1	0.1	0.137	-0.193238	0.000113631	1	PCEC2	0.213	0.113	-0.586774	4.28785e-11	1.27499e-06
1593	Alk
1594	Alkbh1																																					PCEC1	0.333	0.421	0.0583437	2.26845e-07	0.00674524	PCEC2	0.517	0.374	0.105518	4.0153e-09	0.000119395
1595	Alkbh2																																					PCEC1	0.085	0.128	0.332008	6.6929e-06	0.199013	PCEC2	0.248	0.097	0.265835	2.2473e-25	6.68233e-21
1596	Alkbh3							GE1	0.391	0.478	-0.0383881	0.00104124	1							EA	0.39	0.476	-0.509648	0.000190918	1																			PCEC2	0.718	0.443	-0.202378	4.86687e-26	1.44716e-21
1597	Alkbh4																																					PCEC1	0.114	0.159	0.124662	2.46167e-05	0.731979	PCEC2	0.262	0.129	0.138978	3.79413e-17	1.12818e-12
1598	Alkbh5																																					PCEC1	0.577	0.716	-0.0063152	1.54139e-21	4.58332e-17	PCEC2	0.911	0.637	0.0302508	2.20576e-30	6.55883e-26
1599	Alkbh6																															AVR	0.341	0.42	-0.215264	0.000109706	1	PCEC1	0.349	0.448	0.191934	4.75373e-09	0.000141352	PCEC2	0.689	0.381	0.0837345	7.38669e-38	2.19643e-33
1600	Alkbh7																																					PCEC1	0.147	0.214	0.0188172	9.01161e-09	0.00026796	PCEC2	0.363	0.17	0.158482	5.14713e-26	1.5305e-21
1601	Alkbh8	AA	0.195	0.132	0.81084	0.00791888	1																															PCEC1	0.093	0.159	-0.146048	6.06528e-11	1.80351e-06	PCEC2	0.23	0.124	-0.283165	1.05557e-11	3.13875e-07
1602	Alms1																															AVR	0.108	0.077	-0.0439746	0.00879921	1	PCEC1	0.057	0.093	0.234048	2.52919e-06	0.0752055	PCEC2	0.121	0.075	-0.336605	0.000198504	1
1603	Alms1-ps2
1604	Alox12																									DVR	0.727	0.644	0.597077	1.37468e-09	4.0876e-05							PCEC1	0.566	0.697	-0.387062	9.06417e-30	2.69523e-25	PCEC2	0.877	0.624	-0.423546	1.96055e-29	5.82968e-25
1605	Alox12e																									DVR	0.006	0.001	0.397176	0.00254037	1
1606	Alox5ap	AA	0.302	0.123	1.49479	2.84524e-16	8.46031e-12	GE1	0.199	0.123	1.24018	8.83142e-08	0.00262602	GE2	0.201	0.122	1.00535	1.27968e-08	0.000380513													AVR	0.081	0.136	-2.1602	6.34032e-05	1	PCEC1	0.057	0.172	-1.99527	4.15141e-36	1.23442e-31	PCEC2	0.266	0.114	-0.296437	2.10862e-22	6.26997e-18
1607	Alox8																																					PCEC1	0.032	0.052	-0.180121	0.000635039	1	PCEC2	0.076	0.041	0.303177	0.000176624	1
1608	Aloxe3
1609	Alpk1
1610	Alpk2	AA	0.353	0.457	-0.318178	0.000497356	1							GE2	0.628	0.433	0.371839	6.95859e-21	2.06914e-16																			PCEC1	0.356	0.509	-0.369741	1.03909e-30	3.08975e-26	PCEC2	0.622	0.434	0.532131	3.30812e-22	9.83668e-18
1611	Alpk3																									DVR	0.014	0.003	-0.0952408	0.000510863	1
1612	Alpl	AA	0.884	0.766	1.04552	2.59849e-25	7.7266e-21	GE1	0.917	0.756	1.54238	6.83674e-76	2.03291e-71	GE2	0.885	0.757	0.948433	3.33939e-46	9.92967e-42	EA	0.843	0.766	0.711318	6.26603e-22	1.86321e-17	DVR	0.688	0.776	-2.76052	5.09229e-23	1.51419e-18	AVR	0.639	0.786	-1.94262	1.95793e-45	5.82191e-41	PCEC1	0.682	0.822	-1.29711	3.97319e-81	1.18143e-76	PCEC2	0.929	0.753	-0.782003	1.72149e-20	5.11885e-16
1613	Als2							GE1	0.141	0.221	-0.967432	9.32523e-06	0.277286																									PCEC1	0.166	0.241	0.216879	3.47239e-09	0.000103252	PCEC2	0.401	0.193	0.119163	4.98425e-29	1.48207e-24
1614	Als2cl							GE1	0.745	0.764	-0.229431	0.00786778	1																									PCEC1	0.703	0.797	0.0266899	1.96853e-11	5.85342e-07	PCEC2	0.957	0.741	0.0401388	4.39985e-30	1.3083e-25
1615	Alx1
1616	Alx4																																					PCEC1	0.032	0.054	-0.0371739	0.000303866	1
1617	Alyref													GE2	0.264	0.183	0.264226	4.21494e-06	0.125331																			PCEC1	0.135	0.223	-0.209591	2.10422e-14	6.25688e-10	PCEC2	0.329	0.176	-0.00693007	3.60566e-17	1.07214e-12
1618	Alyref2																															AVR	0.088	0.131	-0.173423	0.00267664	1	PCEC1	0.075	0.156	-0.291705	2.34949e-17	6.98621e-13	PCEC2	0.318	0.105	0.443453	3.71909e-46	1.10587e-41
1619	Amacr																															AVR	0.131	0.188	0.0517057	0.00132689	1	PCEC1	0.137	0.207	0.00710165	3.48793e-10	1.03714e-05	PCEC2	0.4	0.157	0.184429	9.80302e-44	2.91493e-39
1620	Ambp																																											PCEC2	0.002	0	0.00222629	0.0028878	1
1621	Ambra1																																					PCEC1	0.111	0.176	0.0378578	7.01209e-10	2.08505e-05	PCEC2	0.297	0.136	-0.10202	3.92617e-22	1.16745e-17
1622	Amd-ps1													GE2	0.009	0.002	0.0270182	0.00297868	1
1623	Amd-ps3	AA	0.023	0.005	0.0255959	0.000222664	1																															PCEC1	0.001	0.008	-0.0124036	0.000894123	1
1624	Amd1	AA	0.335	0.236	0.845501	0.000109233	1	GE1	0.186	0.245	-0.481959	0.00190976	1	GE2	0.343	0.228	0.35204	2.52361e-10	7.50394e-06	EA	0.291	0.236	0.396088	0.00833364	1	DVR	0.318	0.234	0.399317	0.000228459	1							PCEC1	0.136	0.3	-0.585465	5.72635e-42	1.70273e-37	PCEC2	0.374	0.225	-0.243604	1.0201e-11	3.03327e-07
1625	Amd2	AA	0.163	0.076	0.28985	3.98073e-06	0.118367							GE2	0.136	0.073	0.0849121	4.11237e-07	0.0122281	EA	0.122	0.077	0.0778651	0.00273068	1	DVR	0.128	0.076	0.163876	0.000363898	1							PCEC1	0.041	0.101	-0.14131	4.63243e-15	1.37745e-10
1626	Amdhd1																									DVR	0.006	0	0.614406	2.65088e-05	0.78824
1627	Amdhd2	AA	0.181	0.283	-0.658247	0.000667987	1													EA	0.221	0.283	-0.343358	0.0068753	1													PCEC1	0.248	0.297	0.207884	0.00187183	1	PCEC2	0.472	0.257	-0.224289	2.05405e-24	6.10772e-20
1628	Amer1	AA	0.214	0.147	0.293365	0.00805068	1																									AVR	0.108	0.155	-0.158252	0.00254558	1	PCEC1	0.108	0.174	-0.231128	1.64576e-10	4.89366e-06	PCEC2	0.298	0.133	-0.0127971	2.80216e-24	8.33222e-20
1629	Amfr																									DVR	0.577	0.506	0.318285	0.00180851	1	AVR	0.423	0.521	-0.238565	1.96178e-06	0.0583336	PCEC1	0.434	0.554	0.0593616	3.14289e-13	9.34538e-09	PCEC2	0.779	0.48	0.044616	2.44998e-37	7.28503e-33
1630	Amh
1631	Amica1
1632	Amigo1																															AVR	0.031	0.057	-0.342622	0.0082784	1	PCEC1	0.039	0.064	-0.139239	9.01054e-05	1	PCEC2	0.139	0.045	0.0410351	3.16003e-20	9.39635e-16
1633	Amigo2																															AVR	0.246	0.314	-0.384363	0.000250503	1	PCEC1	0.237	0.347	0.164047	2.58382e-15	7.683e-11	PCEC2	0.539	0.281	0.0885954	7.15996e-32	2.12901e-27
1634	Amigo3
1635	Ammecr1																									DVR	0.089	0.042	0.79344	1.7668e-05	0.525358							PCEC1	0.027	0.055	-0.475505	6.8833e-07	0.0204675	PCEC2	0.087	0.04	0.102222	6.22711e-07	0.0185163
1636	Ammecr1l																															AVR	0.239	0.303	0.0358405	0.00180451	1	PCEC1	0.218	0.342	-0.143293	9.04431e-21	2.68932e-16	PCEC2	0.579	0.265	0.0688408	1.47208e-51	4.37722e-47
1637	Amn																																					PCEC1	0.006	0.014	0.0393526	0.00953166	1
1638	Amn1													GE2	0.384	0.326	0.290952	0.00842413	1																			PCEC1	0.251	0.378	-0.0924644	9.14671e-19	2.71977e-14	PCEC2	0.535	0.309	0.256245	2.57845e-28	7.66702e-24
1639	Amot							GE1	0.118	0.081	0.722635	0.0049165	1	GE2	0.122	0.08	0.709904	0.000534891	1																			PCEC1	0.055	0.101	-0.524999	5.54035e-09	0.000164742	PCEC2	0.154	0.076	0.170569	5.9692e-10	1.77494e-05
1640	Amotl1													GE2	0.786	0.659	0.404986	1.89261e-15	5.62767e-11													AVR	0.621	0.678	-0.146611	1.12239e-05	0.333743	PCEC1	0.571	0.73	-0.14083	3.76891e-32	1.12069e-27	PCEC2	0.96	0.64	0.286094	9.66606e-53	2.8742e-48
1641	Amotl2																			EA	0.738	0.742	-0.304152	0.00360248	1													PCEC1	0.686	0.774	-0.0147741	1.78146e-11	5.29718e-07	PCEC2	0.953	0.718	-0.0798685	1.63541e-26	4.8629e-22
1642	Ampd1
1643	Ampd2																															AVR	0.289	0.361	-0.0167726	0.00119126	1	PCEC1	0.291	0.389	0.0103757	2.25434e-11	6.70327e-07	PCEC2	0.642	0.321	-0.054757	2.7032e-46	8.03798e-42
1644	Ampd3																									DVR	0.412	0.356	0.338379	0.00815642	1							PCEC1	0.293	0.399	-0.0375259	1.37928e-13	4.10128e-09	PCEC2	0.609	0.332	0.103549	5.28694e-35	1.57207e-30
1645	Amph																									DVR	0.011	0.002	0.465467	0.000427748	1
1646	Amt																																											PCEC2	0.081	0.047	0.465608	0.00043919	1
1647	Amy1																									DVR	0.097	0.063	0.270109	0.00918271	1							PCEC1	0.045	0.077	-0.142368	4.80956e-06	0.143012	PCEC2	0.105	0.061	0.0298129	0.000149145	1
1648	Amz1																																					PCEC1	0.098	0.153	0.0137953	2.92867e-08	0.000870841	PCEC2	0.277	0.117	0.0154295	1.95798e-24	5.82204e-20
1649	Amz2																																					PCEC1	0.224	0.313	-0.0201843	4.65398e-11	1.38386e-06	PCEC2	0.535	0.252	0.127432	1.76638e-40	5.25232e-36
1650	Anapc1																															AVR	0.299	0.357	-0.181934	0.00140016	1	PCEC1	0.262	0.401	-0.0924646	1.59086e-20	4.73042e-16	PCEC2	0.586	0.324	0.0606654	1.04866e-30	3.11819e-26
1651	Anapc10																																					PCEC1	0.149	0.228	0.14024	6.56254e-11	1.95137e-06	PCEC2	0.335	0.184	-0.118679	3.2251e-15	9.58984e-11
1652	Anapc11	AA	0.767	0.696	0.278555	0.00143589	1																									AVR	0.613	0.709	-0.243401	1.17064e-07	0.0034809	PCEC1	0.628	0.74	-0.0142564	2.958e-09	8.79563e-05	PCEC2	0.935	0.672	0.247067	1.70184e-21	5.06041e-17
1653	Anapc13																									DVR	0.543	0.471	0.358847	7.0729e-05	1							PCEC1	0.399	0.52	-0.118046	3.89196e-13	1.15727e-08	PCEC2	0.68	0.453	0.15172	6.34622e-15	1.88705e-10
1654	Anapc15																																					PCEC1	0.078	0.153	-0.0887152	6.63727e-15	1.97359e-10	PCEC2	0.284	0.108	0.108098	2.16528e-30	6.43847e-26
1655	Anapc16	AA	0.693	0.598	0.187953	0.00136036	1							GE2	0.578	0.605	-0.306747	0.00717533	1							DVR	0.663	0.598	0.25794	0.00175039	1							PCEC1	0.503	0.659	-0.0673409	4.16283e-25	1.23782e-20	PCEC2	0.882	0.57	0.112028	4.35623e-42	1.29532e-37
1656	Anapc2																															AVR	0.561	0.686	-0.392715	3.86048e-11	1.14791e-06	PCEC1	0.614	0.706	0.138006	5.85613e-08	0.00174132	PCEC2	0.926	0.644	-0.117366	1.35726e-33	4.03583e-29
1657	Anapc4																																					PCEC1	0.324	0.451	-0.0299716	5.87335e-17	1.74644e-12	PCEC2	0.691	0.372	-0.317456	8.91066e-39	2.64958e-34
1658	Anapc5																																					PCEC1	0.813	0.88	0.0468721	7.17056e-08	0.00213217	PCEC2	0.984	0.841	-0.0843358	9.09906e-15	2.7056e-10
1659	Anapc7																															AVR	0.33	0.41	-0.173167	0.000143957	1	PCEC1	0.362	0.425	0.36587	0.000243816	1	PCEC2	0.557	0.384	-0.521929	1.38093e-14	4.10618e-10
1660	Ang	AA	0.195	0.083	0.571675	8.27679e-09	0.00024611	GE1	0.043	0.092	-0.694851	0.000250398	1	GE2	0.032	0.094	-0.862805	8.65206e-07	0.0257269							DVR	0.036	0.091	-0.627573	0.000300077	1	AVR	0.059	0.091	-0.490706	0.0090999	1							PCEC2	0.157	0.079	-0.0671452	4.98953e-09	0.000148364
1661	Angel1																																					PCEC1	0.085	0.13	0.0214833	1.27575e-06	0.0379344	PCEC2	0.222	0.101	-0.0859736	5.96117e-17	1.77255e-12
1662	Angel2																															AVR	0.384	0.457	0.0465364	0.00255975	1	PCEC1	0.378	0.49	-0.0258936	2.55635e-13	7.60132e-09	PCEC2	0.712	0.419	0.0477197	8.95981e-37	2.6642e-32
1663	Angpt1	AA	0.116	0.018	1.92225	5.35871e-23	1.59341e-18																			DVR	0.061	0.019	1.21591	5.36381e-08	0.00159493							PCEC1	0.009	0.029	-0.94512	1.51056e-06	0.0449165
1664	Angpt2							GE1	0.242	0.334	-1.37026	5.73707e-06	0.170592	GE2	0.282	0.331	-1.59766	0.000266417	1	EA	0.256	0.331	-2.74548	0.000505464	1	DVR	0.423	0.319	0.726857	3.60649e-06	0.107239							PCEC1	0.256	0.366	-0.111084	5.07512e-15	1.50909e-10	PCEC2	0.586	0.297	-0.234072	5.32959e-43	1.58475e-38
1665	Angptl1																															AVR	0.014	0.004	0.170877	0.000824171	1
1666	Angptl2	AA	0.219	0.073	2.25928	1.36549e-16	4.06029e-12																									AVR	0.038	0.083	-1.66343	8.11558e-05	1	PCEC1	0.044	0.098	-0.895164	8.99033e-13	2.67328e-08	PCEC2	0.175	0.067	-0.346734	3.65299e-19	1.08622e-14
1667	Angptl4																																					PCEC1	0.055	0.101	-0.0273527	6.86032e-09	0.000203992	PCEC2	0.204	0.07	-0.0442494	2.06778e-27	6.14854e-23
1668	Angptl6																																											PCEC2	0.367	0.217	-0.147353	3.81891e-12	1.13555e-07
1669	Angptl7	AA	0.042	0.017	-0.067947	0.00714232	1
1670	Ank																																					PCEC1	0.233	0.287	0.336392	0.000347882	1	PCEC2	0.41	0.251	-0.35696	5.10012e-14	1.51652e-09
1671	Ank2																																					PCEC1	0.047	0.067	-0.241367	0.00283001	1
1672	Ank3																																					PCEC1	0.044	0.081	-0.433738	7.88413e-08	0.00234434
1673	Ankdd1a	AA	0.005	0	0.191704	0.00879187	1
1674	Ankdd1b													GE2	0.169	0.082	1.8384	7.5294e-13	2.23887e-08																			PCEC1	0.045	0.118	-1.84646	6.90714e-20	2.05384e-15	PCEC2	0.181	0.081	-0.0179815	2.70425e-14	8.04107e-10
1675	Ankfn1	AA	0.009	0.001	-0.00394637	0.000211254	1
1676	Ankfy1							GE1	0.458	0.548	-0.0855836	0.000232191	1	GE2	0.662	0.526	-0.147158	2.79773e-07	0.00831905																			PCEC1	0.439	0.599	0.170192	1.50371e-22	4.47129e-18	PCEC2	0.745	0.517	-0.335334	1.30221e-25	3.87213e-21
1677	Ankhd1																															AVR	0.317	0.37	-0.13863	0.00252469	1	PCEC1	0.291	0.407	0.0569333	1.60533e-13	4.77345e-09	PCEC2	0.613	0.337	0.370724	1.36816e-34	4.06822e-30
1678	Ankib1																															AVR	0.138	0.188	-0.501284	0.00166334	1	PCEC1	0.132	0.212	-0.137367	1.61614e-12	4.8056e-08	PCEC2	0.392	0.159	0.046344	1.41321e-39	4.20218e-35
1679	Ankle1							GE1	0.021	0.066	-0.359403	7.27939e-05	1
1680	Ankle2																															AVR	0.296	0.352	0.00154714	0.00919264	1	PCEC1	0.287	0.38	0.034177	3.3783e-11	1.00454e-06	PCEC2	0.582	0.319	-0.179854	7.64869e-32	2.27434e-27
1681	Ankmy1																																											PCEC2	0.002	0	0.00144681	0.0028878	1
1682	Ankmy2																															AVR	0.229	0.294	-0.650644	0.000175756	1	PCEC1	0.253	0.307	0.110161	8.74779e-05	1	PCEC2	0.47	0.267	-0.404836	1.38057e-21	4.10511e-17
1683	Ankra2																																					PCEC1	0.17	0.239	0.134331	5.65862e-08	0.00168259	PCEC2	0.382	0.195	0.141167	1.36792e-22	4.0675e-18
1684	Ankrd10																																					PCEC1	0.37	0.478	-0.0551632	1.55841e-11	4.63393e-07	PCEC2	0.705	0.409	0.0728842	1.45404e-40	4.32357e-36
1685	Ankrd11													GE2	0.485	0.423	0.0459628	0.00695287	1																			PCEC1	0.33	0.487	0.0173455	9.84564e-25	2.9276e-20	PCEC2	0.745	0.394	0.251043	1.12681e-51	3.35056e-47
1686	Ankrd12																															AVR	0.325	0.399	-0.050926	0.00499471	1	PCEC1	0.315	0.435	-0.0112412	1.69303e-15	5.03423e-11	PCEC2	0.627	0.365	0.0106231	1.89813e-27	5.64407e-23
1687	Ankrd13a	AA	0.442	0.325	0.560022	7.37201e-05	1	GE1	0.28	0.334	-0.170417	0.00786815	1																			AVR	0.241	0.34	-0.277918	6.13779e-07	0.0182507	PCEC1	0.257	0.371	0.0242502	6.87794e-16	2.04516e-11	PCEC2	0.573	0.302	0.0268302	1.7228e-36	5.12276e-32
1688	Ankrd13b
1689	Ankrd13c													GE2	0.354	0.284	0.091136	0.00181859	1																			PCEC1	0.21	0.338	-0.261947	3.05845e-22	9.09431e-18	PCEC2	0.506	0.267	0.0223464	4.0874e-28	1.21539e-23
1690	Ankrd16																															AVR	0.186	0.247	0.0829957	0.00208651	1	PCEC1	0.206	0.261	0.0231416	2.44545e-05	0.727154	PCEC2	0.423	0.22	0.129181	5.06994e-25	1.50755e-20
1691	Ankrd17							GE1	0.424	0.491	-0.249085	0.00113485	1																									PCEC1	0.4	0.535	-0.0158011	8.13872e-18	2.42005e-13	PCEC2	0.743	0.457	0.443278	2.29113e-39	6.81267e-35
1692	Ankrd23																																					PCEC1	0.068	0.125	-0.0949602	9.29496e-11	2.76386e-06	PCEC2	0.235	0.089	0.693306	1.66163e-27	4.94085e-23
1693	Ankrd23.1																															AVR	0.081	0.119	0.0800682	0.00759344	1	PCEC1	0.082	0.134	-0.00147118	3.73852e-08	0.00111165	PCEC2	0.26	0.099	0.494554	2.10934e-28	6.27211e-24
1694	Ankrd24																									DVR	0.164	0.119	0.510459	0.00984955	1							PCEC1	0.101	0.135	0.213202	0.00047685	1	PCEC2	0.186	0.115	-0.455622	2.9305e-06	0.0871385
1695	Ankrd26																																					PCEC1	0.068	0.114	-0.166882	8.70763e-08	0.00258922	PCEC2	0.233	0.082	0.415692	1.10528e-29	3.28655e-25
1696	Ankrd27																															AVR	0.2	0.274	-0.169204	0.000203168	1	PCEC1	0.211	0.298	0.140589	3.59827e-11	1.06995e-06	PCEC2	0.535	0.236	-0.182325	3.68245e-50	1.09498e-45
1697	Ankrd28							GE1	0.087	0.138	-0.38812	0.00130461	1																									PCEC1	0.111	0.146	-0.00775887	0.000646379	1	PCEC2	0.219	0.124	-0.00798717	1.84787e-09	5.49464e-05
1698	Ankrd29																															AVR	0.281	0.409	-0.569063	1.32388e-10	3.93655e-06	PCEC1	0.309	0.445	-0.180644	1.49354e-20	4.44103e-16	PCEC2	0.689	0.362	-0.0427544	5.45353e-45	1.62161e-40
1699	Ankrd32																																					PCEC1	0.07	0.111	-0.135928	1.87802e-06	0.0558428	PCEC2	0.217	0.082	0.400368	3.33312e-23	9.91102e-19
1700	Ankrd33b	AA	0.298	0.354	-2.08316	0.00617024	1							GE2	0.393	0.347	0.499276	0.00130046	1							DVR	0.262	0.358	-1.59718	1.31816e-06	0.0391955	AVR	0.26	0.362	-0.0529557	2.83244e-06	0.0842227	PCEC1	0.315	0.372	0.0816299	0.00030424	1	PCEC2	0.579	0.326	-0.0818738	8.92218e-27	2.65301e-22
1701	Ankrd34a																																					PCEC1	0.016	0.03	0.0178296	0.000791713	1	PCEC2	0.067	0.02	-0.23572	2.72309e-11	8.0971e-07
1702	Ankrd34b													GE2	0.002	0	0.00196252	0.00300224	1
1703	Ankrd35
1704	Ankrd37																															AVR	0.191	0.142	1.2373	0.000101532	1	PCEC1	0.082	0.185	-0.289175	1.56854e-24	4.66405e-20	PCEC2	0.322	0.128	0.370304	2.31804e-32	6.89268e-28
1705	Ankrd39																																					PCEC1	0.127	0.179	0.23923	2.15394e-06	0.0640473	PCEC2	0.322	0.142	0.0477811	3.45808e-27	1.02826e-22
1706	Ankrd40																															AVR	0.165	0.214	0.101342	0.00824936	1	PCEC1	0.152	0.242	-0.162688	8.86223e-15	2.63519e-10	PCEC2	0.42	0.185	0.123055	4.00988e-37	1.19234e-32
1707	Ankrd42																																					PCEC1	0.166	0.215	0.0405459	8.70928e-05	1	PCEC2	0.288	0.187	-0.227139	4.33164e-07	0.0128801
1708	Ankrd44							GE1	0.563	0.428	0.971962	1.32592e-16	3.94261e-12	GE2	0.627	0.419	1.35287	5.72018e-41	1.7009e-36	EA	0.337	0.447	-2.03397	3.73177e-07	0.0110964	DVR	0.404	0.443	-1.55194	0.000483645	1	AVR	0.351	0.451	-0.496563	7.34681e-07	0.0218457	PCEC1	0.351	0.491	-0.444391	2.77591e-25	8.25416e-21	PCEC2	0.626	0.419	-0.259617	2.56349e-16	7.62254e-12
1709	Ankrd46	AA	0.688	0.591	0.372611	2.26088e-05	0.672272													EA	0.651	0.591	0.593075	0.000160623	1	DVR	0.68	0.589	0.774023	8.40197e-12	2.49833e-07	AVR	0.497	0.606	-0.445444	2.68822e-10	7.99342e-06	PCEC1	0.503	0.647	-0.231646	8.31554e-28	2.47263e-23	PCEC2	0.872	0.564	-0.18621	8.14952e-38	2.42326e-33
1710	Ankrd49																															AVR	0.119	0.197	-0.796822	1.73095e-06	0.0514697	PCEC1	0.15	0.21	0.096692	9.95341e-07	0.0295965	PCEC2	0.331	0.172	-0.178059	7.22491e-17	2.14833e-12
1711	Ankrd50													GE2	0.338	0.262	0.396585	0.000102493	1																			PCEC1	0.18	0.321	-0.312468	1.62698e-27	4.83781e-23	PCEC2	0.546	0.239	0.251351	6.32307e-52	1.88016e-47
1712	Ankrd52	AA	0.353	0.262	0.178547	0.00632824	1																									AVR	0.215	0.272	-0.149866	0.00364165	1	PCEC1	0.233	0.284	-0.0552017	0.000946529	1	PCEC2	0.376	0.253	-0.382217	1.36918e-06	0.0407125
1713	Ankrd53	AA	0.005	0	0.00427996	7.80799e-07	0.0232171
1714	Ankrd54													GE2	0.266	0.306	-0.375097	0.00342392	1													AVR	0.243	0.309	-0.0797102	0.00170558	1	PCEC1	0.256	0.329	0.148753	6.57656e-07	0.0195554	PCEC2	0.573	0.271	0.132978	1.65728e-47	4.92793e-43
1715	Ankrd55																																					PCEC1	0.033	0.05	-0.0261337	0.0028268	1
1716	Ankrd6																																					PCEC1	0.025	0.048	-0.488789	2.02067e-05	0.600845	PCEC2	0.071	0.036	0.0519485	7.97934e-05	1
1717	Ankrd61																																					PCEC1	0.097	0.159	-0.227691	5.55273e-10	1.6511e-05	PCEC2	0.221	0.127	-0.0734067	7.61796e-08	0.0022652
1718	Ankrd9																																					PCEC1	0.05	0.091	-0.503069	4.97742e-08	0.00148004	PCEC2	0.195	0.063	0.0726848	1.37812e-28	4.09783e-24
1719	Anks1	AA	0.33	0.38	-1.94422	0.00906262	1							GE2	0.467	0.367	0.464105	5.55025e-07	0.0165037							DVR	0.309	0.382	-0.587216	0.00167855	1	AVR	0.277	0.39	-0.0221326	2.42897e-07	0.00722254	PCEC1	0.307	0.418	-0.099329	1.9065e-13	5.66896e-09	PCEC2	0.597	0.353	-0.0601625	9.55659e-26	2.84165e-21
1720	Anks3																															AVR	0.253	0.328	0.036528	0.000396723	1	PCEC1	0.27	0.349	0.172215	9.65554e-08	0.00287107	PCEC2	0.568	0.292	-0.136502	2.40194e-38	7.14217e-34
1721	Anks6																																					PCEC1	0.008	0.02	-0.163975	0.000657704	1	PCEC2	0.045	0.012	0.658187	3.08812e-09	9.18254e-05
1722	Ankzf1																															AVR	0.162	0.219	-0.0944711	0.00148712	1	PCEC1	0.17	0.237	0.256518	2.28692e-07	0.00680015	PCEC2	0.36	0.196	-0.311012	2.99868e-17	8.91659e-13
1723	Anln																																					PCEC1	0.006	0.016	-0.279482	0.000752415	1	PCEC2	0	0.013	-0.616905	0.00609975	1
1724	Ano1																			EA	0.032	0.014	-0.0704855	0.00885192	1	DVR	0.033	0.014	0.705387	0.00342556	1													PCEC2	0.002	0.017	-0.113523	0.00676391	1
1725	Ano10																									DVR	0.429	0.371	0.58461	0.00179816	1	AVR	0.298	0.384	-0.373055	1.93618e-05	0.575724	PCEC1	0.321	0.405	0.222078	3.40111e-08	0.00101132	PCEC2	0.629	0.346	-0.1604	2.57923e-36	7.66934e-32
1726	Ano2																			EA	0.017	0.005	0.871111	0.00358592	1
1727	Ano6	AA	0.884	0.799	0.220058	1.43552e-06	0.0426852	GE1	0.745	0.808	-0.617105	6.32246e-15	1.87998e-10	GE2	0.743	0.809	-0.793542	2.5922e-17	7.7079e-13	EA	0.858	0.799	0.604495	2.72641e-10	8.10699e-06	DVR	0.836	0.8	0.438059	3.71574e-08	0.00110487							PCEC1	0.75	0.833	0.00251758	7.68835e-09	0.000228613	PCEC2	0.969	0.784	-0.0563291	5.39312e-20	1.60364e-15
1728	Ano8																																					PCEC1	0.134	0.171	0.165664	0.000959447	1	PCEC2	0.197	0.153	0.234814	0.00917756	1
1729	Ano9																									DVR	0.011	0.001	0.487785	6.47512e-05	1
1730	Anp32-ps													GE2	0.009	0.002	0.00728231	0.0053423	1
1731	Anp32a																																					PCEC1	0.461	0.582	-0.05068	4.18566e-12	1.24461e-07	PCEC2	0.689	0.52	0.0584926	1.60229e-09	4.7644e-05
1732	Anp32b													GE2	0.609	0.546	0.103846	0.00920651	1													AVR	0.475	0.561	-0.23789	3.06114e-05	0.910229	PCEC1	0.457	0.607	-0.118487	2.04024e-20	6.06665e-16	PCEC2	0.837	0.52	0.224158	1.09888e-34	3.26752e-30
1733	Anp32e							GE1	0.251	0.313	-0.341499	0.00258013	1																			AVR	0.232	0.316	0.109219	0.000213002	1	PCEC1	0.226	0.355	-0.23164	2.53922e-22	7.55036e-18	PCEC2	0.588	0.276	0.0762776	3.93117e-47	1.16893e-42
1734	Anpep							GE1	0.035	0.013	0.583536	0.000154448	1	GE2	0.032	0.013	0.439837	0.000456342	1																			PCEC1	0.008	0.019	-0.476617	0.000931563	1
1735	Antxr1	AA	0.126	0.028	2.33039	5.19426e-16	1.54451e-11																															PCEC1	0.023	0.038	-0.660141	0.00216384	1	PCEC2	0.056	0.03	-0.243682	0.000867017	1
1736	Antxr2							GE1	0.298	0.255	0.713895	0.0044378	1	GE2	0.312	0.252	0.398756	0.00292384	1													AVR	0.177	0.268	-0.734738	4.55653e-07	0.0135488	PCEC1	0.189	0.299	-0.122091	3.45143e-17	1.02628e-12	PCEC2	0.456	0.236	-0.222945	6.55079e-26	1.94788e-21
1737	Anxa1	AA	0.874	0.782	0.095514	0.00206739	1	GE1	0.834	0.781	0.207282	4.19295e-05	1	GE2	0.887	0.774	0.707493	4.27539e-33	1.27129e-28	EA	0.823	0.783	0.135216	0.00747706	1													PCEC1	0.672	0.851	-0.58482	4.31241e-84	1.2823e-79	PCEC2	0.975	0.764	-0.163487	3.56721e-17	1.06071e-12
1738	Anxa11	AA	0.665	0.551	0.184851	0.000389619	1	GE1	0.621	0.549	0.311443	8.63186e-05	1	GE2	0.627	0.548	0.299228	5.66433e-06	0.168429													AVR	0.451	0.568	-0.23366	2.62288e-07	0.00779914	PCEC1	0.448	0.618	-0.316771	3.7777e-29	1.1233e-24	PCEC2	0.796	0.529	0.0519634	2.61219e-17	7.76736e-13
1739	Anxa11os							GE1	0.416	0.318	0.296475	4.79694e-06	0.142637	GE2	0.425	0.316	0.309011	5.85008e-08	0.00173952													AVR	0.258	0.335	-0.260198	0.000204719	1	PCEC1	0.25	0.372	-0.307828	6.22579e-18	1.85124e-13	PCEC2	0.398	0.319	0.0440975	0.00792755	1
1740	Anxa2													GE2	0.996	0.994	-0.193675	3.68535e-07	0.0109584	EA	0.994	0.994	0.338563	1.67715e-21	4.98699e-17	DVR	0.992	0.995	-0.123721	0.00562631	1
1741	Anxa3	AA	0.986	0.925	0.502683	2.25919e-18	6.71771e-14	GE1	0.911	0.929	-0.376791	1.04145e-08	0.000309675	GE2	0.91	0.929	-0.607973	3.99241e-19	1.18714e-14													AVR	0.929	0.927	0.177053	0.0054675	1							PCEC2	0.995	0.92	-0.0624312	2.3935e-05	0.711708
1742	Anxa4																			EA	0.727	0.699	0.5574	3.65138e-05	1	DVR	0.772	0.696	0.521177	6.54227e-08	0.00194534	AVR	0.637	0.708	-0.148178	2.35841e-06	0.0701273	PCEC1	0.616	0.749	-0.0473398	1.84602e-18	5.48913e-14	PCEC2	0.919	0.676	-0.116317	1.83119e-31	5.44505e-27
1743	Anxa5	AA	0.995	0.972	0.144842	0.000513028	1	GE1	0.961	0.974	-0.288886	1.19535e-08	0.000355437	GE2	0.975	0.972	-0.290263	5.54813e-09	0.000164974	EA	0.991	0.971	0.372001	1.28238e-16	3.81317e-12	DVR	0.992	0.971	0.641119	4.56369e-58	1.35701e-53							PCEC1	0.956	0.982	-0.113783	2.36052e-10	7.019e-06
1744	Anxa6	AA	0.842	0.75	0.403892	4.28159e-08	0.00127313							GE2	0.81	0.747	0.179186	0.00139623	1							DVR	0.794	0.751	0.458556	6.34915e-08	0.00188792	AVR	0.67	0.763	-0.272637	9.27007e-12	2.75645e-07	PCEC1	0.677	0.798	-0.172185	2.14253e-29	6.37081e-25	PCEC2	0.933	0.733	-0.416433	1.6972e-17	5.04662e-13
1745	Anxa7	AA	0.833	0.754	0.197895	0.000346911	1	GE1	0.743	0.758	-0.224059	0.00440155	1																									PCEC1	0.683	0.799	-0.0198777	2.56854e-17	7.63754e-13	PCEC2	0.966	0.733	-0.0463043	5.00044e-30	1.48688e-25
1746	Anxa9							GE1	0.234	0.187	0.0294042	0.00934309	1	GE2	0.253	0.184	0.098113	0.000298665	1							DVR	0.304	0.183	0.175278	5.64894e-08	0.00167971	AVR	0.146	0.196	-0.253744	0.00562985	1	PCEC1	0.139	0.221	-0.321837	3.78584e-12	1.12572e-07
1747	Aoc2													GE2	0.075	0.046	0.442752	0.00308912	1	EA	0.017	0.052	-1.021	0.00437545	1													PCEC1	0.038	0.056	0.0435962	0.00376406	1
1748	Aox1																									DVR	0.134	0.081	0.967981	0.000296016	1							PCEC1	0.06	0.098	-0.480794	8.91454e-07	0.0265074	PCEC2	0.156	0.076	0.223258	1.59073e-10	4.73002e-06
1749	Aox2																									DVR	0.006	0	0.224805	0.000454286	1
1750	Aox4							GE1	0.004	0	0.00434114	0.00371915	1
1751	Ap1ar																															AVR	0.103	0.17	-0.0767846	4.50549e-05	1	PCEC1	0.113	0.191	-0.0530685	4.90843e-13	1.45952e-08	PCEC2	0.351	0.142	0.0763011	5.13534e-36	1.52699e-31
1752	Ap1b1																															AVR	0.473	0.57	0.149474	0.000154427	1	PCEC1	0.484	0.603	0.0399493	5.43141e-13	1.61503e-08	PCEC2	0.866	0.525	-0.00351975	2.03053e-48	6.03779e-44
1753	Ap1g1																																					PCEC1	0.196	0.28	0.0504124	2.33721e-10	6.94969e-06	PCEC2	0.458	0.226	0.0356199	1.96774e-29	5.85108e-25
1754	Ap1g2													GE2	0.242	0.315	-0.124071	0.000751401	1													AVR	0.25	0.315	-0.125006	0.00193497	1	PCEC1	0.272	0.329	0.180341	0.000110662	1	PCEC2	0.55	0.281	-0.00659091	1.15631e-32	3.43829e-28
1755	Ap1m1																															AVR	0.573	0.67	0.0855164	0.000733502	1	PCEC1	0.603	0.693	0.0526379	7.91356e-11	2.3531e-06	PCEC2	0.901	0.633	-0.0645946	3.94542e-36	1.17317e-31
1756	Ap1m2																			EA	0.02	0.005	0.64433	0.000278268	1
1757	Ap1s1																															AVR	0.444	0.534	-0.108251	0.000394207	1	PCEC1	0.475	0.553	0.117642	4.74068e-06	0.140964	PCEC2	0.783	0.496	-0.152412	7.15658e-30	2.12801e-25
1758	Ap1s2																															AVR	0.387	0.466	-0.138444	0.000235466	1	PCEC1	0.382	0.501	-0.015033	1.9416e-14	5.77336e-10	PCEC2	0.714	0.428	-0.438101	9.29653e-27	2.76432e-22
1759	Ap1s3																																					PCEC1	0.071	0.093	0.104882	0.00619166	1	PCEC2	0.132	0.08	0.267011	2.50164e-05	0.743864
1760	Ap2a1							GE1	0.553	0.463	0.328098	6.32329e-06	0.188023																			AVR	0.349	0.485	-0.358943	2.60646e-09	7.7503e-05	PCEC1	0.414	0.503	0.286909	4.34514e-06	0.129203	PCEC2	0.7	0.445	-0.186269	4.98308e-21	1.48172e-16
1761	Ap2a2	AA	0.628	0.56	0.0361846	0.00938879	1																									AVR	0.509	0.569	-0.077813	0.00653308	1	PCEC1	0.453	0.626	-0.116136	6.3531e-29	1.88909e-24	PCEC2	0.85	0.53	-0.0497626	5.23381e-37	1.55627e-32
1762	Ap2b1																									DVR	0.496	0.392	0.659317	3.21876e-07	0.00957099							PCEC1	0.301	0.455	-0.235934	3.02346e-25	8.99027e-21	PCEC2	0.689	0.366	0.226855	6.2202e-38	1.84958e-33
1763	Ap2s1							GE1	0.727	0.676	0.164548	0.00789663	1																			AVR	0.583	0.692	-0.257206	3.88745e-07	0.0115593	PCEC1	0.611	0.72	0.0438004	1.06255e-08	0.000315948	PCEC2	0.915	0.654	0.242539	1.10097e-30	3.27373e-26
1764	Ap3b1																															AVR	0.248	0.321	-0.355766	0.000144316	1	PCEC1	0.241	0.355	-0.0799553	1.03009e-16	3.06298e-12	PCEC2	0.561	0.286	-0.0438911	9.44648e-37	2.80891e-32
1765	Ap3b2
1766	Ap3d1																			EA	0.515	0.579	-0.531447	0.00190892	1							AVR	0.515	0.582	-0.00443765	0.00050917	1	PCEC1	0.487	0.625	0.0417729	2.04957e-19	6.09441e-15	PCEC2	0.872	0.541	0.0544302	3.45619e-50	1.0277e-45
1767	Ap3m1																															AVR	0.48	0.569	-0.0539961	0.000986436	1	PCEC1	0.471	0.611	-0.128943	2.70764e-20	8.05118e-16	PCEC2	0.83	0.529	0.012078	1.45995e-26	4.34115e-22
1768	Ap3m2																															AVR	0.22	0.293	-0.36548	9.03918e-05	1	PCEC1	0.208	0.329	-0.153536	5.85102e-20	1.7398e-15	PCEC2	0.524	0.258	0.14913	4.63598e-40	1.37851e-35
1769	Ap3s1																																					PCEC1	0.148	0.223	-0.00269175	7.70208e-10	2.29021e-05	PCEC2	0.342	0.179	-0.0808338	1.64209e-17	4.88276e-13
1770	Ap3s1-ps1
1771	Ap3s1-ps2																															AVR	0.005	0	0.00696709	0.000340972	1
1772	Ap3s2	AA	0.391	0.306	0.462469	0.00587656	1																									AVR	0.246	0.317	-0.118422	0.000357719	1	PCEC1	0.235	0.352	-0.190337	3.15386e-18	9.37801e-14	PCEC2	0.57	0.28	0.238488	1.27666e-44	3.79616e-40
1773	Ap4b1																															AVR	0.155	0.24	-0.0809054	5.37017e-06	0.159682	PCEC1	0.184	0.257	0.0999224	1.6749e-08	0.000498031	PCEC2	0.438	0.207	-0.143876	1.09093e-31	3.24388e-27
1774	Ap4b1.1																															AVR	0.139	0.22	-0.0809874	8.52948e-06	0.253624	PCEC1	0.168	0.237	0.0964109	4.34126e-08	0.00129087	PCEC2	0.407	0.19	-0.119265	8.15249e-30	2.42414e-25
1775	Ap4e1																																					PCEC1	0.13	0.177	-0.532786	4.89895e-06	0.14567	PCEC2	0.28	0.146	0.272206	6.68191e-16	1.98687e-11
1776	Ap4m1																															AVR	0.277	0.388	-0.451497	2.80482e-08	0.000834014	PCEC1	0.321	0.409	0.141337	1.2478e-08	0.000371034	PCEC2	0.58	0.354	0.121364	2.58692e-22	7.69222e-18
1777	Ap4s1																															AVR	0.251	0.313	0.0727588	0.00781762	1	PCEC1	0.251	0.338	0.00594949	1.44459e-09	4.29549e-05	PCEC2	0.546	0.279	0.0257485	3.28253e-33	9.76059e-29
1778	Ap5b1																															AVR	0.029	0.058	0.0398614	0.0039269	1	PCEC1	0.038	0.065	-0.110825	1.75671e-05	0.522358	PCEC2	0.146	0.045	0.163314	4.4962e-23	1.33695e-18
1779	Ap5m1	AA	0.335	0.231	0.0693706	0.00297267	1																															PCEC1	0.189	0.261	0.0824927	2.46961e-08	0.000734339	PCEC2	0.43	0.213	0.0709251	2.05456e-28	6.10925e-24
1780	Ap5s1																															AVR	0.131	0.194	-0.15961	0.000318035	1	PCEC1	0.154	0.207	0.0851754	3.41162e-06	0.101445	PCEC2	0.345	0.17	-0.274155	2.62463e-22	7.80433e-18
1781	Ap5z1																									DVR	0.273	0.204	0.206553	0.00281949	1							PCEC1	0.148	0.244	-0.248445	3.769e-16	1.12071e-11	PCEC2	0.4	0.187	0.110383	1.73772e-30	5.1671e-26
1782	Apaf1																																					PCEC1	0.102	0.186	-0.527284	4.97273e-16	1.47864e-11	PCEC2	0.28	0.141	0.0779342	1.34999e-17	4.01421e-13
1783	Apba1	AA	0.307	0.074	2.41259	1.42463e-37	4.23613e-33													EA	0.128	0.081	0.404054	0.00227816	1	DVR	0.128	0.081	1.04262	0.000917225	1	AVR	0.046	0.088	-0.68022	0.000465479	1	PCEC1	0.038	0.11	-1.08166	9.72977e-21	2.89315e-16	PCEC2	0.154	0.076	-0.83751	1.53623e-09	4.56799e-05
1784	Apba2
1785	Apba3																															AVR	0.274	0.395	-0.36883	2.1335e-09	6.34397e-05	PCEC1	0.3	0.429	0.00843469	1.27311e-17	3.78558e-13	PCEC2	0.723	0.343	0.0880266	6.84397e-65	2.03505e-60
1786	Apbb1	AA	0.335	0.252	0.815349	0.00063513	1																									AVR	0.186	0.263	-0.389399	3.05811e-05	0.909328	PCEC1	0.198	0.288	0.118825	4.254e-12	1.26493e-07	PCEC2	0.476	0.23	-0.215528	4.62806e-35	1.37615e-30
1787	Apbb1ip																																					PCEC1	0.015	0.027	-0.151858	0.00334633	1	PCEC2	0.052	0.02	0.320045	8.9989e-07	0.0267582
1788	Apbb2							GE1	0.76	0.794	-0.150054	0.00315128	1							EA	0.733	0.795	-0.377394	3.33397e-06	0.0991356													PCEC1	0.745	0.817	0.0860726	0.000560809	1	PCEC2	0.962	0.772	-0.104395	5.14993e-17	1.53133e-12
1789	Apc																																					PCEC1	0.212	0.317	-0.329632	1.07957e-15	3.21011e-11	PCEC2	0.521	0.251	0.0744499	4.11158e-37	1.22258e-32
1790	Apc2
1791	Apcs																															AVR	0.002	0	0.00523641	0.00375008	1
1792	Apeh																															AVR	0.298	0.393	-0.169536	1.52436e-05	0.453268	PCEC1	0.334	0.412	0.33586	2.76122e-06	0.0821049	PCEC2	0.66	0.352	-0.162843	5.00604e-45	1.48855e-40
1793	Apela
1794	Apex1	AA	0.27	0.19	0.866098	0.00187156	1																									AVR	0.139	0.2	-0.343501	0.000357859	1	PCEC1	0.137	0.226	-0.22397	6.15006e-15	1.82872e-10	PCEC2	0.447	0.165	0.314615	1.29832e-55	3.86055e-51
1795	Apex2																																					PCEC1	0.17	0.225	-0.224555	6.06969e-06	0.180482	PCEC2	0.367	0.187	0.118336	2.30232e-22	6.84595e-18
1796	Aph1a																															AVR	0.346	0.46	-0.363754	1.61364e-07	0.00479816	PCEC1	0.389	0.481	0.0980404	2.29054e-07	0.00681093	PCEC2	0.693	0.42	-0.131554	5.25292e-22	1.56196e-17
1797	Aph1b																																					PCEC1	0.053	0.08	-0.40658	0.000172665	1
1798	Aph1c																																					PCEC1	0.012	0.029	-0.147428	3.78663e-05	1
1799	Api5													GE2	0.689	0.636	0.259812	0.0017929	1																			PCEC1	0.551	0.694	-0.166514	9.26937e-25	2.75625e-20	PCEC2	0.892	0.614	-0.209643	1.75959e-25	5.23213e-21
1800	Apip																															AVR	0.176	0.253	-0.437491	2.18808e-05	0.650625	PCEC1	0.201	0.27	0.266029	6.5203e-07	0.0193881	PCEC2	0.49	0.217	0.130218	2.23374e-41	6.64202e-37
1801	Apitd1																																											PCEC2	0.031	0.011	0.0164904	0.000141954	1
1802	Aplf
1803	Apln							GE1	0.128	0.208	-1.94919	3.80639e-06	0.113183							EA	0.154	0.204	-2.85608	0.00996842	1							AVR	0.15	0.207	0.0462982	0.00178335	1	PCEC1	0.155	0.227	0.311177	9.21264e-09	0.000273938	PCEC2	0.423	0.176	0.163445	1.21806e-43	3.62189e-39
1804	Aplnr	AA	0.684	0.727	-3.45501	2.79574e-07	0.00831313	GE1	0.648	0.732	-1.68712	2.83617e-17	8.43336e-13	GE2	0.68	0.73	-1.5609	1.43008e-12	4.25233e-08	EA	0.616	0.732	-3.6244	1.53165e-18	4.55437e-14	DVR	0.699	0.727	-3.51418	3.03416e-12	9.02206e-08							PCEC1	0.701	0.739	0.998824	5.06369e-06	0.150569	PCEC2	0.957	0.699	-0.00550906	6.10507e-70	1.81534e-65
1805	Aplp1																									DVR	0.228	0.153	0.234138	8.04191e-05	1							PCEC1	0.121	0.179	0.208412	8.08724e-08	0.00240474	PCEC2	0.21	0.152	-0.0737564	0.000419615	1
1806	Aplp2	AA	1	0.993	0.204162	2.77647e-06	0.0825585	GE1	0.998	0.993	-0.272865	2.28511e-07	0.00679478	GE2	0.989	0.994	-0.343965	4.5567e-13	1.35494e-08							DVR	0.997	0.993	0.429315	1.44614e-24	4.30008e-20
1807	Apmap																															AVR	0.439	0.51	0.00930965	0.00177389	1	PCEC1	0.437	0.54	-0.0089165	6.6932e-12	1.99022e-07	PCEC2	0.785	0.471	0.0562838	8.708e-44	2.58932e-39
1808	Apoa1																																											PCEC2	0.009	0.002	0.14873	0.00287303	1
1809	Apoa1bp													GE2	0.456	0.495	-0.419047	0.00444246	1													AVR	0.384	0.503	-0.15419	9.15919e-07	0.0272349	PCEC1	0.432	0.524	0.156823	2.97749e-07	0.00885358	PCEC2	0.79	0.457	-0.125295	1.33159e-38	3.95947e-34
1810	Apobec1	AA	0.093	0.05	0.290852	0.00487297	1
1811	Apobec2
1812	Apobec3							GE1	0.609	0.691	-0.701222	1.09618e-10	3.25949e-06	GE2	0.639	0.689	-0.502658	4.06757e-05	1							DVR	0.618	0.688	-0.51554	7.81351e-05	1	AVR	0.695	0.682	0.381338	0.00117061	1	PCEC1	0.639	0.709	0.16348	0.000837429	1	PCEC2	0.91	0.658	0.0807057	1.70825e-31	5.07949e-27
1813	Apoc2	AA	0.005	0	0.00321338	0.000808947	1
1814	Apoc3							GE1	0.006	0.001	-0.0635005	0.00430099	1
1815	Apod	AA	0.088	0.043	-0.222363	0.00167885	1							GE2	0.07	0.042	-0.199024	0.00267635	1	EA	0.081	0.043	0.739981	0.000559535	1													PCEC1	0.025	0.057	-0.323499	7.1883e-08	0.00213744
1816	Apoe	AA	0.842	0.866	-1.78295	6.76959e-11	2.01294e-06	GE1	0.791	0.872	-2.06233	1.8354e-32	5.45756e-28	GE2	0.819	0.87	-2.00445	9.5851e-40	2.85013e-35	EA	0.75	0.872	-2.01473	2.91298e-23	8.66175e-19	DVR	0.922	0.861	0.737829	9.24944e-22	2.75032e-17	AVR	0.867	0.864	0.671835	1.42094e-07	0.00422518	PCEC1	0.866	0.864	0.410944	6.98704e-07	0.020776	PCEC2	0.982	0.852	0.00714776	4.25019e-32	1.26379e-27
1817	Apoh	AA	0.065	0.028	0.363518	0.0016268	1							GE2	0.075	0.024	0.332012	1.26127e-11	3.7504e-07																			PCEC1	0.016	0.037	-0.116235	9.58624e-06	0.285047
1818	Apol10b							GE1	0.05	0.111	-1.86993	1.59388e-05	0.47394	GE2	0.07	0.11	-1.86971	0.00163083	1																			PCEC1	0.085	0.118	0.50589	0.000319179	1	PCEC2	0.19	0.097	-0.514024	2.57853e-11	7.66726e-07
1819	Apol6																																					PCEC1	0.01	0.02	-0.0173336	0.00709269	1
1820	Apol7a
1821	Apol7b																																					PCEC1	0.002	0	0.0111983	0.00834357	1
1822	Apol7c	AA	0.009	0.002	0.514852	0.00892673	1																																					PCEC2	0.007	0.001	-0.0514319	0.0017242	1
1823	Apol7d	AA	0.233	0.007	1.58317	1.11733e-146	3.32238e-142																									AVR	0	0.018	-0.276628	0.00110745	1	PCEC1	0.002	0.025	-0.367657	7.57713e-11	2.25306e-06
1824	Apol7e																																					PCEC1	0.005	0.001	0.24577	0.00656188	1
1825	Apol8													GE2	0.009	0.002	0.577699	0.00155856	1
1826	Apol9a	AA	0.288	0.146	0.82971	3.91948e-09	0.000116546	GE1	0.068	0.159	-1.75493	2.65844e-08	0.000790486	GE2	0.065	0.161	-1.71394	2.4876e-10	7.39689e-06							DVR	0.242	0.145	0.761964	6.82988e-08	0.00203086							PCEC1	0.122	0.168	0.221007	2.28643e-05	0.679871	PCEC2	0.315	0.133	-0.0477617	5.01211e-27	1.49035e-22
1827	Apol9b	AA	0.228	0.122	0.607498	4.18972e-06	0.124581	GE1	0.052	0.133	-1.43042	1.53486e-07	0.00456391	GE2	0.066	0.133	-1.62815	1.61843e-06	0.048124	EA	0.078	0.129	-0.109756	0.00716657	1	DVR	0.195	0.121	0.721604	1.31064e-05	0.389717													PCEC2	0.219	0.115	-0.192154	2.93819e-11	8.73672e-07
1828	Apold1	AA	0.698	0.724	-0.619739	0.00261675	1	GE1	0.621	0.733	-1.21199	4.18178e-19	1.24345e-14	GE2	0.86	0.707	0.946743	7.60224e-44	2.26053e-39	EA	0.747	0.721	0.166774	0.00990958	1							AVR	0.84	0.709	1.20524	3.73436e-41	1.11041e-36	PCEC1	0.594	0.797	-1.23154	2.86228e-113	8.51098e-109	PCEC2	0.966	0.695	0.0394566	7.47911e-58	2.22391e-53
1829	Apon													GE2	0.014	0.005	0.743146	0.00979409	1
1830	Apoo																																					PCEC1	0.092	0.132	0.100332	3.00156e-05	0.892513	PCEC2	0.217	0.106	-0.0969533	3.25899e-13	9.6906e-09
1831	Apool																																					PCEC1	0.16	0.225	0.084993	5.53533e-08	0.00164593	PCEC2	0.365	0.183	0.0284207	8.7388e-23	2.59848e-18
1832	Apopt1													GE2	0.508	0.442	0.102559	0.00625703	1																			PCEC1	0.368	0.495	0.0433959	7.57037e-15	2.25105e-10	PCEC2	0.714	0.419	0.141215	1.28869e-32	3.83191e-28
1833	App	AA	0.995	0.997	-0.205175	0.000108472	1	GE1	0.998	0.997	0.198051	5.04037e-11	1.49875e-06	GE2	0.998	0.997	0.0835037	0.000229308	1	EA	0.985	0.997	-0.371625	3.34435e-17	9.94444e-13	DVR	1	0.996	-0.166082	0.000118804	1
1834	Appbp2																																					PCEC1	0.347	0.477	-0.0637461	3.55712e-18	1.05771e-13	PCEC2	0.729	0.396	0.00658925	1.72526e-47	5.13006e-43
1835	Appl1																																					PCEC1	0.328	0.418	-0.122611	2.10051e-10	6.24587e-06	PCEC2	0.559	0.366	-0.201938	1.74549e-15	5.19022e-11
1836	Appl2																			EA	0.166	0.234	-0.532854	0.00420972	1													PCEC1	0.188	0.253	0.222131	6.80153e-07	0.0202243	PCEC2	0.387	0.212	-0.289203	7.19788e-20	2.14029e-15
1837	Aprt													GE2	0.411	0.468	-1.03468	3.06893e-06	0.0912545							DVR	0.409	0.466	-0.515859	0.00198666	1							PCEC1	0.398	0.499	0.296984	6.82777e-06	0.203024	PCEC2	0.783	0.426	0.314934	3.76936e-56	1.12082e-51
1838	Aptx																																					PCEC1	0.193	0.257	0.207506	5.72511e-07	0.0170236	PCEC2	0.385	0.217	-0.514921	5.58891e-17	1.66186e-12
1839	Aqp1							GE1	0.901	0.871	-0.461919	4.77976e-09	0.000142126	GE2	0.932	0.867	-0.468802	1.04159e-10	3.09718e-06							DVR	0.997	0.865	3.59753	2.3614e-184	7.02161e-180	AVR	0.836	0.878	-2.90453	3.76993e-30	1.12099e-25	PCEC1	0.807	0.912	-3.02025	3.7769e-124	1.12306e-119	PCEC2	0.976	0.862	-0.676728	2.49013e-55	7.40441e-51
1840	Aqp10-ps																																											PCEC2	0.018	0.007	0.119053	0.00542154	1
1841	Aqp11																									DVR	0.593	0.264	2.2062	8.37563e-66	2.49049e-61	AVR	0.21	0.294	-0.168229	1.42453e-05	0.423585	PCEC1	0.195	0.337	-0.708087	2.18334e-30	6.49217e-26	PCEC2	0.55	0.256	-0.311519	1.66562e-43	4.95272e-39
1842	Aqp2	AA	0.084	0.044	0.435304	0.00699309	1	GE1	0.085	0.042	0.354664	1.79421e-05	0.533508													DVR	0.089	0.043	0.436552	6.98166e-05	1							PCEC1	0.034	0.053	0.193983	0.00165464	1	PCEC2	0.018	0.049	-1.0917	0.000955442	1
1843	Aqp3																																					PCEC1	0.021	0.034	0.350955	0.00615721	1
1844	Aqp5
1845	Aqp7																																											PCEC2	0.058	0.029	0.0273105	0.000144585	1
1846	Aqp9
1847	Aqr																									DVR	0.482	0.368	0.456603	8.95916e-06	0.266401							PCEC1	0.273	0.434	-0.108748	1.97195e-28	5.86358e-24	PCEC2	0.68	0.341	0.158204	1.05991e-48	3.15164e-44
1848	Ar																			EA	0.247	0.176	0.579024	0.000395272	1							AVR	0.134	0.186	-0.441805	0.00145837	1	PCEC1	0.131	0.21	-0.0725961	5.0607e-12	1.5048e-07	PCEC2	0.367	0.16	-0.137134	1.03812e-31	3.08686e-27
1849	Araf																															AVR	0.596	0.646	-0.104541	0.000612207	1	PCEC1	0.571	0.681	0.125801	1.3543e-10	4.02701e-06	PCEC2	0.892	0.613	0.0506464	4.03457e-39	1.19968e-34
1850	Arap1	AA	0.391	0.262	1.14743	4.29618e-07	0.0127747													EA	0.331	0.263	0.916706	0.000638818	1	DVR	0.201	0.272	-0.382608	0.0014626	1	AVR	0.186	0.277	-0.868844	2.94521e-07	0.00875758	PCEC1	0.177	0.319	-0.496513	3.40448e-30	1.01232e-25	PCEC2	0.537	0.237	-0.18806	8.43422e-51	2.50792e-46
1851	Arap2	AA	0.172	0.236	-2.59643	0.00409565	1	GE1	0.323	0.224	0.680993	3.663e-08	0.00108919	GE2	0.39	0.215	1.26115	3.36113e-25	9.99431e-21							DVR	0.162	0.238	-1.12236	0.000206031	1	AVR	0.162	0.242	-0.526848	9.59316e-06	0.285253	PCEC1	0.153	0.279	-0.638027	1.2246e-25	3.64136e-21	PCEC2	0.43	0.211	0.175087	3.20861e-28	9.54079e-24
1852	Arap3	AA	0.749	0.76	-0.638717	0.000697048	1							GE2	0.813	0.753	0.149335	3.39192e-05	1	EA	0.674	0.765	-0.594761	5.72362e-09	0.000170192	DVR	0.716	0.762	-0.391824	7.71113e-05	1							PCEC1	0.705	0.79	0.0701313	1.24159e-06	0.0369186	PCEC2	0.971	0.735	0.263756	1.2612e-29	3.75017e-25
1853	Arc							GE1	0.342	0.434	-1.03533	7.21927e-08	0.00214665	GE2	0.636	0.402	1.635	2.3489e-43	6.98444e-39													AVR	0.454	0.423	1.12552	0.00131816	1	PCEC1	0.273	0.515	-1.75929	2.08329e-85	6.19465e-81	PCEC2	0.794	0.385	-0.00612024	8.01576e-93	2.38349e-88
1854	Arcn1																																					PCEC1	0.633	0.767	-0.0519489	3.24671e-21	9.6541e-17	PCEC2	0.929	0.695	-0.00309535	4.14098e-23	1.23132e-18
1855	Arel1																																					PCEC1	0.104	0.172	-0.113599	5.17022e-11	1.53736e-06	PCEC2	0.302	0.13	0.0454405	4.77145e-27	1.41879e-22
1856	Arf1							GE1	0.983	0.982	0.0916871	0.00778218	1
1857	Arf2							GE1	0.646	0.721	-0.359775	3.15407e-05	0.937863							EA	0.791	0.71	0.577279	3.34304e-09	9.94052e-05							AVR	0.63	0.725	-0.00731367	0.000104161	1	PCEC1	0.662	0.745	0.0101579	4.8716e-11	1.44857e-06	PCEC2	0.928	0.691	-0.0762486	3.88929e-32	1.15648e-27
1858	Arf3							GE1	0.387	0.326	0.1334	0.00457418	1																									PCEC1	0.26	0.373	0.163782	1.85607e-14	5.51901e-10	PCEC2	0.476	0.316	-0.236593	1.97112e-13	5.86112e-09
1859	Arf4													GE2	0.908	0.854	0.125627	8.8347e-05	1																			PCEC1	0.799	0.894	-0.0126745	6.13225e-13	1.82342e-08	PCEC2	0.975	0.846	-0.00684625	6.30949e-12	1.87613e-07
1860	Arf4os																																					PCEC1	0.243	0.308	-0.0846185	4.92042e-06	0.146309
1861	Arf5							GE1	0.752	0.696	0.303369	9.52778e-07	0.0283309																			AVR	0.58	0.715	-0.39112	5.51884e-12	1.64103e-07	PCEC1	0.642	0.735	0.0173777	5.66984e-07	0.0168593	PCEC2	0.92	0.676	0.0158899	1.07953e-12	3.21e-08
1862	Arf6																			EA	0.387	0.31	0.714204	9.07716e-05	1													PCEC1	0.242	0.357	-0.214229	6.42374e-17	1.9101e-12	PCEC2	0.561	0.287	0.047409	1.87806e-32	5.58441e-28
1863	Arfgap1													GE2	0.386	0.428	-0.557127	0.00112443	1													AVR	0.365	0.43	0.0223667	0.0068314	1	PCEC1	0.37	0.454	0.22341	6.68611e-07	0.0198811	PCEC2	0.687	0.394	-0.105821	9.55403e-38	2.84089e-33
1864	Arfgap2																															AVR	0.458	0.539	-0.277603	1.07522e-06	0.0319718	PCEC1	0.463	0.569	0.182874	1.31447e-08	0.000390857	PCEC2	0.788	0.502	0.0363778	9.43331e-34	2.80499e-29
1865	Arfgap3																															AVR	0.294	0.351	-0.204233	0.00248521	1	PCEC1	0.28	0.382	0.0528669	4.53594e-12	1.34876e-07	PCEC2	0.539	0.323	-0.578707	7.7624e-19	2.30815e-14
1866	Arfgef1							GE1	0.184	0.239	-0.177034	0.00771485	1																			AVR	0.189	0.239	-0.201914	0.00424257	1	PCEC1	0.17	0.271	0.142005	4.21511e-15	1.25336e-10	PCEC2	0.436	0.211	0.153414	1.74709e-30	5.19498e-26
1867	Arfgef2																																					PCEC1	0.104	0.184	-0.109839	2.54013e-14	7.55307e-10	PCEC2	0.347	0.133	-0.0129471	2.1858e-37	6.49947e-33
1868	Arfip1																															AVR	0.31	0.396	0.0862106	0.000243958	1	PCEC1	0.299	0.437	-0.0452813	9.46333e-20	2.81392e-15	PCEC2	0.703	0.351	0.269076	1.78552e-51	5.30923e-47
1869	Arfip2																																					PCEC1	0.233	0.306	-0.0535109	6.14439e-08	0.00182704	PCEC2	0.459	0.259	-0.169925	2.90527e-22	8.63883e-18
1870	Arfrp1																															AVR	0.417	0.525	-0.179736	4.92118e-07	0.0146331	PCEC1	0.436	0.558	-0.188092	6.53959e-18	1.94455e-13	PCEC2	0.785	0.483	0.0567973	3.01047e-37	8.95163e-33
1871	Arg1																																					PCEC1	0.001	0.005	0.0226603	0.00338523	1	PCEC2	0.016	0.002	0.256319	2.26756e-07	0.00674258
1872	Arg2																																					PCEC1	0.242	0.315	-0.0588555	3.5915e-06	0.106793
1873	Arglu1	AA	0.6	0.507	0.215298	0.0058101	1																									AVR	0.439	0.519	-0.237295	0.00120559	1	PCEC1	0.426	0.56	-0.0113019	1.44923e-15	4.30927e-11	PCEC2	0.767	0.482	0.185794	2.30459e-23	6.8527e-19
1874	Arhgap1																			EA	0.706	0.778	-0.480479	1.88792e-06	0.0561373	DVR	0.699	0.778	-0.509572	3.87689e-06	0.115279	AVR	0.74	0.777	-0.00330218	0.00550716	1	PCEC1	0.734	0.796	0.163764	0.000240895	1	PCEC2	0.957	0.753	-0.114871	1.12311e-26	3.33956e-22
1875	Arhgap10							GE1	0.126	0.241	-1.23879	6.00379e-10	1.78523e-05	GE2	0.153	0.24	-0.987756	3.27853e-07	0.00974871	EA	0.145	0.237	-0.835769	3.49801e-05	1																			PCEC2	0.477	0.203	0.507165	8.14243e-43	2.42115e-38
1876	Arhgap11a																																					PCEC1	0.006	0.016	-0.626517	0.00143354	1
1877	Arhgap12																																					PCEC1	0.168	0.269	-0.0666966	2.28489e-15	6.79412e-11	PCEC2	0.416	0.211	-0.0992811	1.37185e-24	4.0792e-20
1878	Arhgap17							GE1	0.466	0.52	-0.597318	0.000429365	1																									PCEC1	0.446	0.555	0.0730272	4.66315e-10	1.38659e-05	PCEC2	0.805	0.482	0.0338722	1.03482e-39	3.07703e-35
1879	Arhgap18	AA	0.433	0.467	-1.64569	0.00708152	1	GE1	0.373	0.475	-0.968861	1.12342e-08	0.000334048	GE2	0.44	0.469	-0.922107	0.000105489	1	EA	0.323	0.475	-1.50682	2.90035e-10	8.62419e-06	DVR	0.384	0.471	-0.813472	6.76567e-05	1													PCEC2	0.761	0.432	0.145642	1.05419e-50	3.13464e-46
1880	Arhgap19																																											PCEC2	0.074	0.036	-0.656069	1.79142e-05	0.53268
1881	Arhgap20																									DVR	0.014	0.003	0.401185	0.00137097	1							PCEC1	0.001	0.006	-0.256696	0.00245982	1
1882	Arhgap20os	AA	0.005	0	0.0653293	0.000805068	1
1883	Arhgap21													GE2	0.16	0.116	0.785423	0.00203805	1													AVR	0.086	0.125	-0.394991	0.00777801	1	PCEC1	0.088	0.139	-0.422623	2.07586e-08	0.000617257	PCEC2	0.255	0.105	-0.186665	6.41354e-23	1.90707e-18
1884	Arhgap22
1885	Arhgap23																																					PCEC1	0.133	0.194	-0.177336	2.31637e-08	0.000688773	PCEC2	0.335	0.154	-0.0911725	2.86018e-25	8.50475e-21
1886	Arhgap24																									DVR	0.081	0.031	1.0323	4.78701e-07	0.0142342							PCEC1	0.023	0.041	-0.47251	0.000420765	1
1887	Arhgap25							GE1	0.298	0.351	-0.25757	0.0059695	1							EA	0.285	0.351	-0.374901	0.00685206	1							AVR	0.287	0.354	0.28749	0.00252798	1	PCEC1	0.286	0.381	-0.0120422	3.71785e-11	1.1055e-06	PCEC2	0.669	0.31	0.0070383	2.19289e-62	6.52056e-58
1888	Arhgap26	AA	0.498	0.629	-0.970342	5.80369e-08	0.00172573							GE2	0.72	0.613	0.471189	3.55727e-12	1.05775e-07	EA	0.523	0.631	-0.699428	1.8355e-07	0.00545787	DVR	0.526	0.631	-1.07115	2.91911e-11	8.67997e-07	AVR	0.575	0.63	-0.0304676	0.00510628	1	PCEC1	0.574	0.652	0.0193419	1.37458e-06	0.0408731	PCEC2	0.857	0.598	-0.120862	2.86396e-26	8.51599e-22
1889	Arhgap27	AA	0.479	0.58	-2.39462	1.0945e-07	0.0032545	GE1	0.538	0.579	-0.489676	0.00144795	1	GE2	0.558	0.578	-0.507417	0.00265906	1	EA	0.5	0.581	-0.143214	0.000870407	1	DVR	0.524	0.579	-0.455647	0.000365068	1													PCEC2	0.861	0.543	0.0365867	7.98742e-47	2.37506e-42
1890	Arhgap27os1	AA	0.079	0.192	-1.35238	8.46399e-06	0.251677	GE1	0.135	0.193	-0.222894	0.00131586	1	GE2	0.149	0.192	-0.541786	0.00757879	1	EA	0.131	0.191	-0.20184	0.005926	1													PCEC1	0.204	0.178	0.337516	0.00357092	1
1891	Arhgap27os2	AA	0.102	0.212	-1.64927	2.40167e-05	0.714135	GE1	0.161	0.212	-0.553974	0.0063596	1													DVR	0.153	0.212	-0.317593	0.0069499	1													PCEC2	0.338	0.193	0.132136	2.53584e-12	7.54032e-08
1892	Arhgap27os3
1893	Arhgap28																																											PCEC2	0.065	0.028	-0.11619	4.22661e-06	0.125678
1894	Arhgap29	AA	0.726	0.761	-0.419255	0.00228266	1													EA	0.645	0.768	-0.751323	2.75581e-15	8.19441e-11	DVR	0.721	0.763	-0.260912	0.00332739	1													PCEC2	0.953	0.738	0.0582714	3.30975e-17	9.84154e-13
1895	Arhgap31																																					PCEC1	0.717	0.793	0.156119	5.73709e-05	1	PCEC2	0.951	0.745	0.0996589	6.1286e-19	1.82234e-14
1896	Arhgap32																																					PCEC1	0.06	0.1	-0.4131	8.14524e-07	0.0242199	PCEC2	0.128	0.081	0.172694	0.00018558	1
1897	Arhgap33																																											PCEC2	0.065	0.03	-0.309634	1.53841e-05	0.457447
1898	Arhgap33os
1899	Arhgap35													GE2	0.242	0.186	0.0163478	0.00391027	1																			PCEC1	0.126	0.229	-0.418583	1.01846e-19	3.02838e-15	PCEC2	0.38	0.17	0.0912165	1.66056e-30	4.93769e-26
1900	Arhgap39																																					PCEC1	0.045	0.071	0.302223	0.000181788	1	PCEC2	0.108	0.056	0.334871	1.0292e-06	0.0306033
1901	Arhgap4																															AVR	0.239	0.307	0.156486	0.00232013	1	PCEC1	0.232	0.339	-0.118733	3.68949e-13	1.09707e-08	PCEC2	0.568	0.27	0.338594	1.04822e-40	3.11688e-36
1902	Arhgap42	AA	0.149	0.066	1.13454	1.34688e-06	0.0400495																			DVR	0.22	0.059	2.16159	5.08458e-34	1.5119e-29	AVR	0.031	0.074	-0.984004	9.60512e-05	1	PCEC1	0.032	0.091	-1.15451	7.42336e-17	2.20734e-12	PCEC2	0.163	0.059	-0.200114	1.86545e-18	5.54691e-14
1903	Arhgap44	AA	0.419	0.08	3.10502	9.23485e-72	2.74598e-67							GE2	0.057	0.097	-0.919496	0.00129039	1	EA	0.169	0.088	1.32074	1.15912e-07	0.00344664							AVR	0.033	0.1	-1.50699	9.67006e-08	0.00287539	PCEC1	0.036	0.126	-1.96661	1.17035e-28	3.48003e-24	PCEC2	0.231	0.077	-0.642058	8.68631e-31	2.58288e-26
1904	Arhgap5	AA	0.484	0.295	0.828616	1.71183e-11	5.09011e-07							GE2	0.364	0.296	0.217826	0.00047887	1							DVR	0.396	0.296	0.371869	9.63904e-06	0.286617	AVR	0.236	0.311	-0.494518	6.30519e-05	1	PCEC1	0.2	0.362	-0.396109	8.6411e-35	2.56943e-30	PCEC2	0.488	0.282	0.0445071	1.21496e-19	3.61267e-15
1905	Arhgap6																																					PCEC1	0.041	0.072	-0.116172	6.35697e-06	0.189024	PCEC2	0.141	0.052	0.0803185	8.49182e-17	2.52504e-12
1906	Arhgap8	AA	0.112	0.025	1.61751	2.02314e-14	6.0158e-10	GE1	0.008	0.03	-0.869106	0.00575428	1																			AVR	0.005	0.031	-0.730287	0.0003844	1	PCEC1	0.015	0.036	0.134937	4.40837e-06	0.131083	PCEC2	0.087	0.022	0.167052	2.65577e-18	7.89694e-14
1907	Arhgap9	AA	0.014	0.002	0.0174394	0.000385431	1
1908	Arhgdia							GE1	0.967	0.957	0.163616	4.49336e-05	1																			AVR	0.947	0.959	-0.182978	3.08979e-06	0.091875							PCEC2	0.995	0.954	-0.0123453	3.30363e-05	0.982335
1909	Arhgdib	AA	0.54	0.351	0.877408	6.60137e-11	1.96292e-06	GE1	0.248	0.369	-2.81301	2.79377e-11	8.30729e-07	GE2	0.255	0.37	-2.09504	2.05396e-12	6.10745e-08	EA	0.422	0.354	0.66835	0.000434246	1	DVR	0.476	0.35	0.731462	3.4228e-09	0.000101777							PCEC1	0.264	0.413	-0.258311	3.43472e-25	1.02131e-20	PCEC2	0.609	0.33	0.0120864	1.69529e-34	5.04093e-30
1910	Arhgdig	AA	0.023	0.003	0.481784	5.38485e-06	0.160118																			DVR	0.014	0.003	0.100158	0.00215223	1
1911	Arhgef1																																					PCEC1	0.717	0.801	0.0596117	5.23242e-09	0.000155586	PCEC2	0.964	0.749	-0.0173001	1.35981e-26	4.0434e-22
1912	Arhgef10							GE1	0.325	0.391	-0.452352	0.00153173	1																			AVR	0.303	0.395	-0.340258	3.86501e-05	1	PCEC1	0.35	0.406	0.451922	0.00860202	1	PCEC2	0.658	0.355	0.110237	1.89387e-39	5.63143e-35
1913	Arhgef10l																			EA	0.078	0.045	1.28349	0.00304004	1													PCEC1	0.03	0.057	-0.917378	7.59609e-06	0.22587
1914	Arhgef11							GE1	0.141	0.192	-0.309995	0.00649919	1	GE2	0.241	0.182	0.536441	0.000407486	1																			PCEC1	0.135	0.218	-0.243896	4.50541e-13	1.33969e-08	PCEC2	0.391	0.165	0.331371	1.49487e-34	4.445e-30
1915	Arhgef12													GE2	0.558	0.484	0.36166	9.04237e-06	0.268875																			PCEC1	0.406	0.541	-0.151051	1.57466e-17	4.68225e-13	PCEC2	0.705	0.468	-0.00167138	1.98081e-18	5.88993e-14
1916	Arhgef15	AA	0.94	0.916	-0.590951	5.02434e-05	1	GE1	0.932	0.915	0.109745	0.0051352	1	GE2	0.95	0.913	0.153175	1.05057e-06	0.0312388	EA	0.89	0.919	-0.124881	0.00174422	1	DVR	0.916	0.917	-0.469766	5.03161e-07	0.0149615							PCEC1	0.885	0.935	0.0999425	0.00896642	1	PCEC2	0.998	0.908	0.14553	2.00529e-13	5.96272e-09
1917	Arhgef16	AA	0.028	0.009	0.33143	0.00586363	1																			DVR	0.028	0.009	-0.397228	0.000378161	1							PCEC1	0.004	0.013	0.312759	0.000884096	1
1918	Arhgef17							GE1	0.021	0.047	-0.945978	0.00838643	1																									PCEC1	0.024	0.056	-0.564336	3.92541e-08	0.00116722	PCEC2	0.107	0.037	1.15881	5.58062e-14	1.6594e-09
1919	Arhgef18																																					PCEC1	0.09	0.18	-0.147251	2.04539e-18	6.08196e-14	PCEC2	0.324	0.127	0.593082	4.13343e-34	1.22908e-29
1920	Arhgef2	AA	0.805	0.649	0.654696	6.71661e-13	1.99718e-08													EA	0.706	0.652	0.23151	0.00440094	1	DVR	0.702	0.652	0.324143	0.000746139	1	AVR	0.59	0.663	0.0201735	0.000443417	1	PCEC1	0.562	0.709	-0.291257	5.85906e-31	1.74219e-26	PCEC2	0.893	0.629	0.0155836	6.01919e-31	1.78981e-26
1921	Arhgef25	AA	0.153	0.262	-2.47029	2.45106e-05	0.728823	GE1	0.317	0.252	0.591177	8.31095e-05	1	GE2	0.312	0.252	0.15744	0.00284532	1							DVR	0.139	0.266	-1.71084	6.19059e-09	0.000184077	AVR	0.191	0.266	-0.0527844	0.000111639	1	PCEC1	0.22	0.28	0.0831972	9.96275e-06	0.296242	PCEC2	0.436	0.238	0.0592088	9.77213e-22	2.90574e-17
1922	Arhgef26	AA	0.288	0.369	-2.97145	0.000180698	1							GE2	0.443	0.357	0.516135	1.61789e-06	0.048108													AVR	0.299	0.373	-0.00862059	0.000497982	1	PCEC1	0.283	0.413	-0.0842386	2.49431e-18	7.41684e-14	PCEC2	0.662	0.332	0.293153	2.42887e-50	7.22226e-46
1923	Arhgef28	AA	0.363	0.277	0.804673	0.000491615	1	GE1	0.201	0.288	-1.04233	1.21326e-05	0.360763							EA	0.392	0.273	1.31348	1.28669e-09	3.82598e-05							AVR	0.181	0.292	-0.470145	1.22237e-08	0.00036347	PCEC1	0.191	0.332	-0.359613	1.11861e-27	3.32618e-23	PCEC2	0.555	0.249	0.22392	3.433e-48	1.0208e-43
1924	Arhgef3	AA	0.865	0.873	-1.0256	6.50495e-10	1.93425e-05							GE2	0.894	0.87	0.188252	1.38065e-05	0.410537	EA	0.89	0.871	0.264757	0.00206403	1	DVR	0.825	0.876	-0.731125	2.85311e-14	8.48371e-10							PCEC1	0.834	0.894	0.0908566	3.1942e-06	0.0949796	PCEC2	0.995	0.859	0.0397156	2.15266e-20	6.40094e-16
1925	Arhgef33
1926	Arhgef38													GE2	0.004	0	0.0449106	0.00849792	1
1927	Arhgef39
1928	Arhgef4													GE2	0.257	0.189	0.318847	0.000532721	1																			PCEC1	0.156	0.218	-0.300411	1.13367e-07	0.00337096	PCEC2	0.264	0.188	0.254276	1.44464e-05	0.429565
1929	Arhgef40							GE1	0.431	0.469	-0.938911	0.00353852	1													DVR	0.423	0.469	-1.08373	0.00278866	1							PCEC1	0.41	0.498	0.447861	0.000100646	1	PCEC2	0.723	0.437	-0.0430762	2.75798e-38	8.20086e-34
1930	Arhgef5																															AVR	0.174	0.229	-0.0793631	0.00175882	1	PCEC1	0.169	0.254	-0.0068489	2.82713e-12	8.40647e-08	PCEC2	0.447	0.198	0.183321	1.05472e-39	3.13622e-35
1931	Arhgef6							GE1	0.159	0.208	-0.227418	0.0082769	1																									PCEC1	0.16	0.229	0.216313	1.00505e-08	0.00029885	PCEC2	0.362	0.186	-0.161722	3.46971e-22	1.03172e-17
1932	Arhgef7	AA	0.549	0.634	-0.767412	0.000379362	1							GE2	0.747	0.618	0.465748	3.10626e-15	9.23647e-11	EA	0.561	0.636	-0.641	7.74484e-06	0.230293	DVR	0.577	0.635	-0.49273	4.50696e-05	1							PCEC1	0.554	0.675	0.0252642	4.7795e-15	1.42118e-10	PCEC2	0.895	0.601	-0.0126206	1.84341e-34	5.48137e-30
1933	Arhgef9																															AVR	0.055	0.095	-0.407959	0.00121643	1	PCEC1	0.076	0.1	0.268961	0.00407092	1	PCEC2	0.175	0.081	-0.21241	4.91249e-13	1.46073e-08
1934	Arid1a													GE2	0.531	0.463	0.326816	0.000286198	1																			PCEC1	0.371	0.527	-0.119905	1.88502e-26	5.60512e-22	PCEC2	0.772	0.436	0.183685	4.98282e-49	1.48164e-44
1935	Arid1b	AA	0.26	0.185	0.252345	0.00396675	1																															PCEC1	0.151	0.21	-0.0303294	2.92993e-07	0.00871216	PCEC2	0.313	0.174	0.0603225	2.94017e-14	8.74259e-10
1936	Arid2																															AVR	0.158	0.207	0.138978	0.0060818	1	PCEC1	0.153	0.23	-0.285177	3.16282e-11	9.40465e-07	PCEC2	0.394	0.18	0.546255	4.24329e-31	1.26174e-26
1937	Arid3a													GE2	0.056	0.033	0.517994	0.00661457	1																			PCEC1	0.025	0.042	0.0183348	0.00104794	1
1938	Arid3b																																					PCEC1	0.03	0.055	-0.704746	1.11702e-05	0.332145	PCEC2	0.103	0.04	0.0548421	1.91339e-11	5.68947e-07
1939	Arid3c																									DVR	0.006	0.001	-0.0271375	0.00255704	1													PCEC2	0.005	0	0.282099	0.00021545	1
1940	Arid4a													GE2	0.404	0.348	0.171733	0.00491671	1													AVR	0.293	0.361	0.0777367	0.00127141	1	PCEC1	0.279	0.396	-0.111413	1.1219e-16	3.33598e-12	PCEC2	0.631	0.322	0.0953406	2.97032e-43	8.83224e-39
1941	Arid4b													GE2	0.612	0.53	0.0958001	0.00680787	1																			PCEC1	0.444	0.593	-0.124106	1.53033e-19	4.55042e-15	PCEC2	0.81	0.508	0.151127	3.10164e-32	9.22271e-28
1942	Arid5a	AA	0.447	0.376	0.620085	0.00704991	1							GE2	0.465	0.369	0.959081	5.22194e-08	0.00155274																			PCEC1	0.263	0.446	-1.22561	3.40611e-47	1.01281e-42	PCEC2	0.673	0.346	-0.582687	8.44794e-49	2.512e-44
1943	Arid5b							GE1	0.783	0.719	0.556644	9.74495e-14	2.89766e-09	GE2	0.864	0.709	0.721208	1.36905e-38	4.07088e-34													AVR	0.666	0.732	-0.191444	3.82553e-06	0.113752	PCEC1	0.621	0.785	-0.466227	1.35696e-53	4.03491e-49	PCEC2	0.929	0.702	-0.039115	7.10997e-15	2.11415e-10
1944	Arih1																																					PCEC1	0.133	0.199	0.35304	1.08882e-08	0.000323759	PCEC2	0.32	0.158	-0.020438	6.91118e-21	2.05504e-16
1945	Arih2							GE1	0.246	0.307	-0.123934	0.00346408	1																									PCEC1	0.224	0.347	-0.248469	6.96153e-20	2.07001e-15	PCEC2	0.571	0.272	0.194482	5.16833e-43	1.5368e-38
1946	Arl1																															AVR	0.632	0.703	0.0158027	0.00192659	1	PCEC1	0.618	0.739	0.0276161	3.02688e-14	9.00043e-10	PCEC2	0.922	0.67	-0.139795	8.7307e-28	2.59607e-23
1947	Arl10																																					PCEC1	0.129	0.172	0.108674	9.71224e-05	1	PCEC2	0.257	0.145	0.0784385	7.18906e-11	2.13767e-06
1948	Arl11													GE2	0.117	0.075	0.81665	0.00039225	1																			PCEC1	0.051	0.096	-0.410964	3.40732e-09	0.000101317	PCEC2	0.181	0.068	0.376156	6.06905e-20	1.80463e-15
1949	Arl13b							GE1	0.168	0.25	-0.451191	4.82816e-05	1	GE2	0.312	0.235	0.509029	3.51681e-05	1																			PCEC1	0.16	0.291	-0.28151	6.91083e-26	2.05493e-21	PCEC2	0.474	0.217	0.296522	5.99367e-38	1.78222e-33
1950	Arl14ep													GE2	0.427	0.355	0.291609	0.000757355	1	EA	0.299	0.366	-0.434399	0.00631546	1							AVR	0.312	0.368	-0.210099	0.00313039	1	PCEC1	0.256	0.423	-0.158187	1.37841e-30	4.09869e-26	PCEC2	0.709	0.323	0.281461	2.60725e-64	7.75265e-60
1951	Arl15	AA	0.405	0.175	1.32938	1.30769e-20	3.88843e-16																			DVR	0.379	0.171	1.15507	6.15979e-27	1.83161e-22							PCEC1	0.114	0.225	-0.497171	4.18127e-24	1.2433e-19	PCEC2	0.3	0.171	-0.287758	2.98267e-10	8.86896e-06
1952	Arl16																															AVR	0.134	0.194	-0.52038	0.000339613	1	PCEC1	0.151	0.208	0.167548	2.105e-06	0.0625921	PCEC2	0.374	0.166	0.269156	1.96634e-32	5.8469e-28
1953	Arl2																									DVR	0.529	0.42	0.381964	2.15349e-06	0.0640339	AVR	0.349	0.437	-0.170452	0.000276697	1	PCEC1	0.352	0.471	0.166446	2.75055e-12	8.17877e-08	PCEC2	0.687	0.398	-0.116906	1.22811e-29	3.65179e-25
1954	Arl2bp	AA	0.549	0.4	0.592443	5.73229e-07	0.017045													EA	0.468	0.402	0.760994	4.4297e-05	1	DVR	0.602	0.392	1.04614	4.12277e-24	1.22591e-19	AVR	0.294	0.419	-0.508913	9.22008e-11	2.74159e-06	PCEC1	0.308	0.462	-0.353117	9.22624e-28	2.74342e-23	PCEC2	0.653	0.378	-0.0897788	4.59103e-31	1.36514e-26
1955	Arl3	AA	0.321	0.25	0.601199	0.00265051	1																			DVR	0.362	0.245	0.604325	2.55408e-08	0.000759455	AVR	0.179	0.261	-0.314285	1.76247e-05	0.524071	PCEC1	0.196	0.285	-0.00521211	4.70026e-12	1.39762e-07	PCEC2	0.477	0.227	0.0822059	7.28927e-33	2.16746e-28
1956	Arl4a							GE1	0.424	0.522	-0.737574	1.55215e-07	0.0046153																			AVR	0.57	0.506	0.885062	1.65536e-10	4.92223e-06	PCEC1	0.412	0.572	-0.534798	2.21305e-36	6.58049e-32	PCEC2	0.759	0.485	-0.213298	6.44923e-29	1.91768e-24
1957	Arl4aos																									DVR	0.019	0.003	0.259986	2.6964e-07	0.00801774
1958	Arl4c																									DVR	0.042	0.018	0.853415	0.0012275	1							PCEC1	0.01	0.025	-0.0934758	0.000175084	1
1959	Arl4d	AA	0.451	0.545	-2.1148	6.74928e-06	0.20069							GE2	0.713	0.522	0.97539	8.30594e-34	2.46977e-29							DVR	0.448	0.548	-1.34046	1.3852e-11	4.1189e-07							PCEC1	0.432	0.605	-0.373007	2.21041e-34	6.57265e-30	PCEC2	0.837	0.508	0.063326	2.3339e-49	6.93985e-45
1960	Arl5a	AA	0.256	0.18	0.256745	0.00636369	1																															PCEC1	0.129	0.214	-0.0615813	4.4455e-13	1.32187e-08	PCEC2	0.418	0.157	0.111826	4.05671e-48	1.20626e-43
1961	Arl5b													GE2	0.503	0.402	0.520841	2.32089e-08	0.000690116																			PCEC1	0.299	0.478	-0.508966	9.98912e-40	2.97026e-35	PCEC2	0.767	0.373	0.350178	1.13334e-59	3.36998e-55
1962	Arl5c																																					PCEC1	0.193	0.258	-0.129391	1.81816e-06	0.0540631	PCEC2	0.423	0.213	0.437909	3.28194e-25	9.75886e-21
1963	Arl6																															AVR	0.134	0.179	-0.218914	0.00830647	1	PCEC1	0.14	0.194	0.222818	3.96011e-06	0.117754	PCEC2	0.333	0.157	0.145968	3.57557e-24	1.0632e-19
1964	Arl6ip1																			EA	0.759	0.832	-0.68261	3.59191e-12	1.06805e-07													PCEC1	0.779	0.855	0.0495557	7.23763e-07	0.0215211	PCEC2	0.978	0.81	0.168917	1.00074e-22	2.97571e-18
1965	Arl6ip4																															AVR	0.298	0.383	-0.443145	2.10621e-05	0.626282	PCEC1	0.318	0.406	0.200838	2.62463e-08	0.000780433	PCEC2	0.627	0.345	-0.0138852	1.01164e-32	3.00812e-28
1966	Arl6ip5	AA	0.823	0.697	0.404874	8.48576e-09	0.000252324													EA	0.75	0.699	0.281691	0.000241881	1							AVR	0.632	0.711	-0.247039	1.51038e-06	0.0449112	PCEC1	0.616	0.752	-0.0525691	1.21359e-18	3.60862e-14	PCEC2	0.915	0.678	-0.133751	9.36894e-13	2.78585e-08
1967	Arl6ip6																																					PCEC1	0.212	0.321	-0.148412	1.93027e-16	5.73966e-12	PCEC2	0.505	0.256	0.0133328	9.00448e-33	2.67748e-28
1968	Arl8a																															AVR	0.155	0.222	-0.267836	0.000262218	1	PCEC1	0.161	0.246	-0.169067	8.14151e-13	2.42088e-08	PCEC2	0.427	0.191	0.174179	1.23941e-34	3.68538e-30
1969	Arl8b																																					PCEC1	0.542	0.682	-0.0183662	3.20083e-20	9.51768e-16	PCEC2	0.917	0.599	0.0249109	5.71092e-42	1.69814e-37
1970	Armc1																																					PCEC1	0.28	0.388	-0.00430135	2.15666e-13	6.41283e-09	PCEC2	0.611	0.319	-0.206989	1.00922e-38	3.00092e-34
1971	Armc10	AA	0.391	0.278	0.719744	4.6226e-05	1																			DVR	0.329	0.279	0.525618	0.0072472	1							PCEC1	0.211	0.324	-0.0225718	4.878e-17	1.45047e-12	PCEC2	0.499	0.258	-0.226549	9.40074e-27	2.79531e-22
1972	Armc3
1973	Armc5																															AVR	0.179	0.28	-0.149193	5.13379e-07	0.0152653	PCEC1	0.214	0.301	0.144305	2.10692e-10	6.26493e-06	PCEC2	0.546	0.238	-0.192189	4.21335e-51	1.25284e-46
1974	Armc6																																					PCEC1	0.088	0.161	-0.0731879	1.96868e-13	5.85387e-09	PCEC2	0.284	0.117	-0.0999486	3.29483e-26	9.79717e-22
1975	Armc7																																					PCEC1	0.206	0.26	0.161881	3.90934e-05	1	PCEC2	0.396	0.223	0.231155	8.78958e-19	2.61358e-14
1976	Armc8																																					PCEC1	0.307	0.41	0.0576416	8.21395e-11	2.44242e-06	PCEC2	0.647	0.341	-0.125822	1.5569e-37	4.62943e-33
1977	Armc9																																					PCEC1	0.041	0.066	-0.0898217	0.000167898	1	PCEC2	0.099	0.052	-0.0581138	5.66807e-06	0.16854
1978	Armcx1	AA	0.437	0.31	0.116075	0.000238693	1							GE2	0.39	0.307	0.622877	5.45681e-06	0.162258													AVR	0.253	0.322	0.137561	0.00164926	1	PCEC1	0.233	0.362	-0.366506	6.15574e-22	1.83041e-17	PCEC2	0.566	0.287	0.0688111	1.34656e-37	4.00398e-33
1979	Armcx2																			EA	0.291	0.36	-0.449714	0.0064219	1	DVR	0.29	0.36	-0.32811	0.00210431	1							PCEC1	0.3	0.387	0.0668163	2.55661e-08	0.000760208	PCEC2	0.597	0.328	-0.441267	4.2365e-28	1.25972e-23
1980	Armcx3	AA	0.488	0.381	0.262426	0.000705271	1																									AVR	0.325	0.392	0.0264778	0.00659706	1	PCEC1	0.317	0.424	-0.0734906	4.72317e-14	1.40444e-09	PCEC2	0.606	0.36	-0.231322	6.20181e-24	1.84411e-19
1981	Armcx4	AA	0.074	0.026	1.05264	1.33071e-05	0.395687							GE2	0.056	0.024	0.494836	1.77791e-05	0.528661																			PCEC1	0.016	0.034	-0.451462	8.61001e-05	1
1982	Armcx5																																					PCEC1	0.133	0.18	0.136578	2.13936e-05	0.636138	PCEC2	0.284	0.149	-0.0680504	3.45906e-14	1.02855e-09
1983	Armcx6	AA	0.149	0.039	-0.16689	2.46908e-14	7.3418e-10																															PCEC1	0.027	0.053	-0.103067	7.96211e-06	0.236753	PCEC2	0.069	0.041	-0.266072	0.00236878	1
1984	Armt1							GE1	0.261	0.327	-0.355562	0.00139241	1													DVR	0.404	0.315	0.022821	0.00128896	1							PCEC1	0.253	0.36	-0.379907	1.20465e-14	3.58203e-10	PCEC2	0.49	0.302	0.194447	2.24912e-20	6.68775e-16
1985	Arnt	AA	0.516	0.413	0.409933	0.00188299	1																									AVR	0.334	0.427	0.0333742	9.79831e-06	0.291353	PCEC1	0.304	0.482	-0.386135	4.96595e-33	1.47662e-28	PCEC2	0.761	0.379	0.0847029	1.70528e-56	5.07064e-52
1986	Arnt2																																					PCEC1	0.003	0.012	-0.35454	0.000685749	1	PCEC2	0.027	0.007	0.20007	6.80727e-07	0.0202414
1987	Arntl																																					PCEC1	0.297	0.426	-0.0913687	1.13441e-18	3.37318e-14	PCEC2	0.693	0.344	0.137648	7.01581e-58	2.08615e-53
1988	Arntl2
1989	Arpc1a																															AVR	0.744	0.797	-0.167199	0.000387803	1	PCEC1	0.739	0.821	0.213503	1.06655e-05	0.317139	PCEC2	0.973	0.771	-0.100574	9.52924e-29	2.83352e-24
1990	Arpc1b	AA	0.995	0.979	0.268647	2.14837e-11	6.38819e-07	GE1	0.971	0.98	-0.229573	3.06075e-07	0.00910114	GE2	0.973	0.98	-0.375288	1.2948e-17	3.85007e-13	EA	0.985	0.979	0.290018	1.13928e-12	3.38765e-08	DVR	0.981	0.979	0.119354	0.000380099	1							PCEC1	0.975	0.982	0.13491	0.00249212	1
1991	Arpc2							GE1	0.95	0.939	0.0922482	0.0014384	1							EA	0.962	0.939	0.12029	0.0082374	1													PCEC1	0.91	0.958	-0.033585	1.55715e-07	0.00463018	PCEC2	0.995	0.934	0.00916677	0.0074311	1
1992	Arpc3																																					PCEC1	0.773	0.849	-0.0237229	4.27827e-06	0.127214	PCEC2	0.955	0.806	0.123417	5.72774e-10	1.70314e-05
1993	Arpc4																															AVR	0.824	0.885	-0.121632	8.18502e-05	1							PCEC2	0.984	0.867	0.0414388	1.47736e-11	4.39292e-07
1994	Arpc5																															AVR	0.744	0.813	-0.222301	2.93902e-07	0.00873917	PCEC1	0.751	0.837	0.0365496	7.50806e-08	0.00223252	PCEC2	0.976	0.786	-0.131961	1.77471e-13	5.2771e-09
1995	Arpc5l																															AVR	0.418	0.494	-0.157741	0.000104259	1	PCEC1	0.419	0.524	0.0518469	2.08337e-08	0.000619489	PCEC2	0.741	0.457	0.0264258	1.17312e-29	3.48828e-25
1996	Arpin																															AVR	0.294	0.383	-0.0863883	1.61816e-05	0.48116	PCEC1	0.314	0.408	-0.0725978	8.32298e-12	2.47484e-07	PCEC2	0.644	0.343	-0.259284	6.52702e-42	1.94081e-37
1997	Arpp19																																					PCEC1	0.602	0.733	0.054394	3.92687e-11	1.16765e-06	PCEC2	0.908	0.66	0.151998	5.73405e-17	1.70502e-12
1998	Arpp21																																					PCEC1	0.003	0.008	-0.0164117	0.00810724	1
1999	Arrb1	AA	0.553	0.305	1.71583	1.90179e-23	5.65497e-19							GE2	0.373	0.308	0.547477	0.000236283	1													AVR	0.25	0.322	-0.785434	8.38049e-06	0.249194	PCEC1	0.204	0.378	-0.977848	3.2486e-44	9.65972e-40	PCEC2	0.561	0.287	-0.45324	4.80984e-36	1.4302e-31
[truncated: 20,044 more rows]
[truncated: 30 more columns]
