# Supplementary material for: Renal Endothelial Single-Cell Transcriptomics Reveals Spatiotemporal Regulation and Divergent Roles of Differential Gene Transcription and Alternative Splicing in Murine Diabetic Nephropathy
Source: Preprints.org preprint supplement (doi:10.20944/preprints202403.1481.v1), 2024-03-25
Supplement: Supplementary file 3 [file supplementary]

Archive with 8 entries (8 files):
- IJMS_2920974_Supplementary Material/Cover Letter_IJMS.pdf
- IJMS_2920974_Supplementary Material/Supplemental Figures and Tables.pdf
- IJMS_2920974_Supplementary Material/Supplemental File 1_DEGs in EC populations.xlsx
- IJMS_2920974_Supplementary Material/Supplemental File 2_IPA analysis all data.pdf
- IJMS_2920974_Supplementary Material/Supplemental File 3_ DEGs lean vs obese.xlsx
- IJMS_2920974_Supplementary Material/Supplemental FIle 4_Oxidative phosphorylation.xlsx
- IJMS_2920974_Supplementary Material/Supplemental File 5_EIF2 signaling.xlsx
- IJMS_2920974_Supplementary Material/Supplemental File 6_Significant DSE with Sachimi plot links.xlsx
