# Supplementary material for: Renal Endothelial Single-Cell Transcriptomics Reveals Spatiotemporal Regulation and Divergent Roles of Differential Gene Transcription and Alternative Splicing in Murine Diabetic Nephropathy
Source: Preprints.org preprint supplement (doi:10.20944/preprints202403.1481.v1), 2024-03-25

# Vascular segments – Canonical pathways

## Analysis Comparison 2

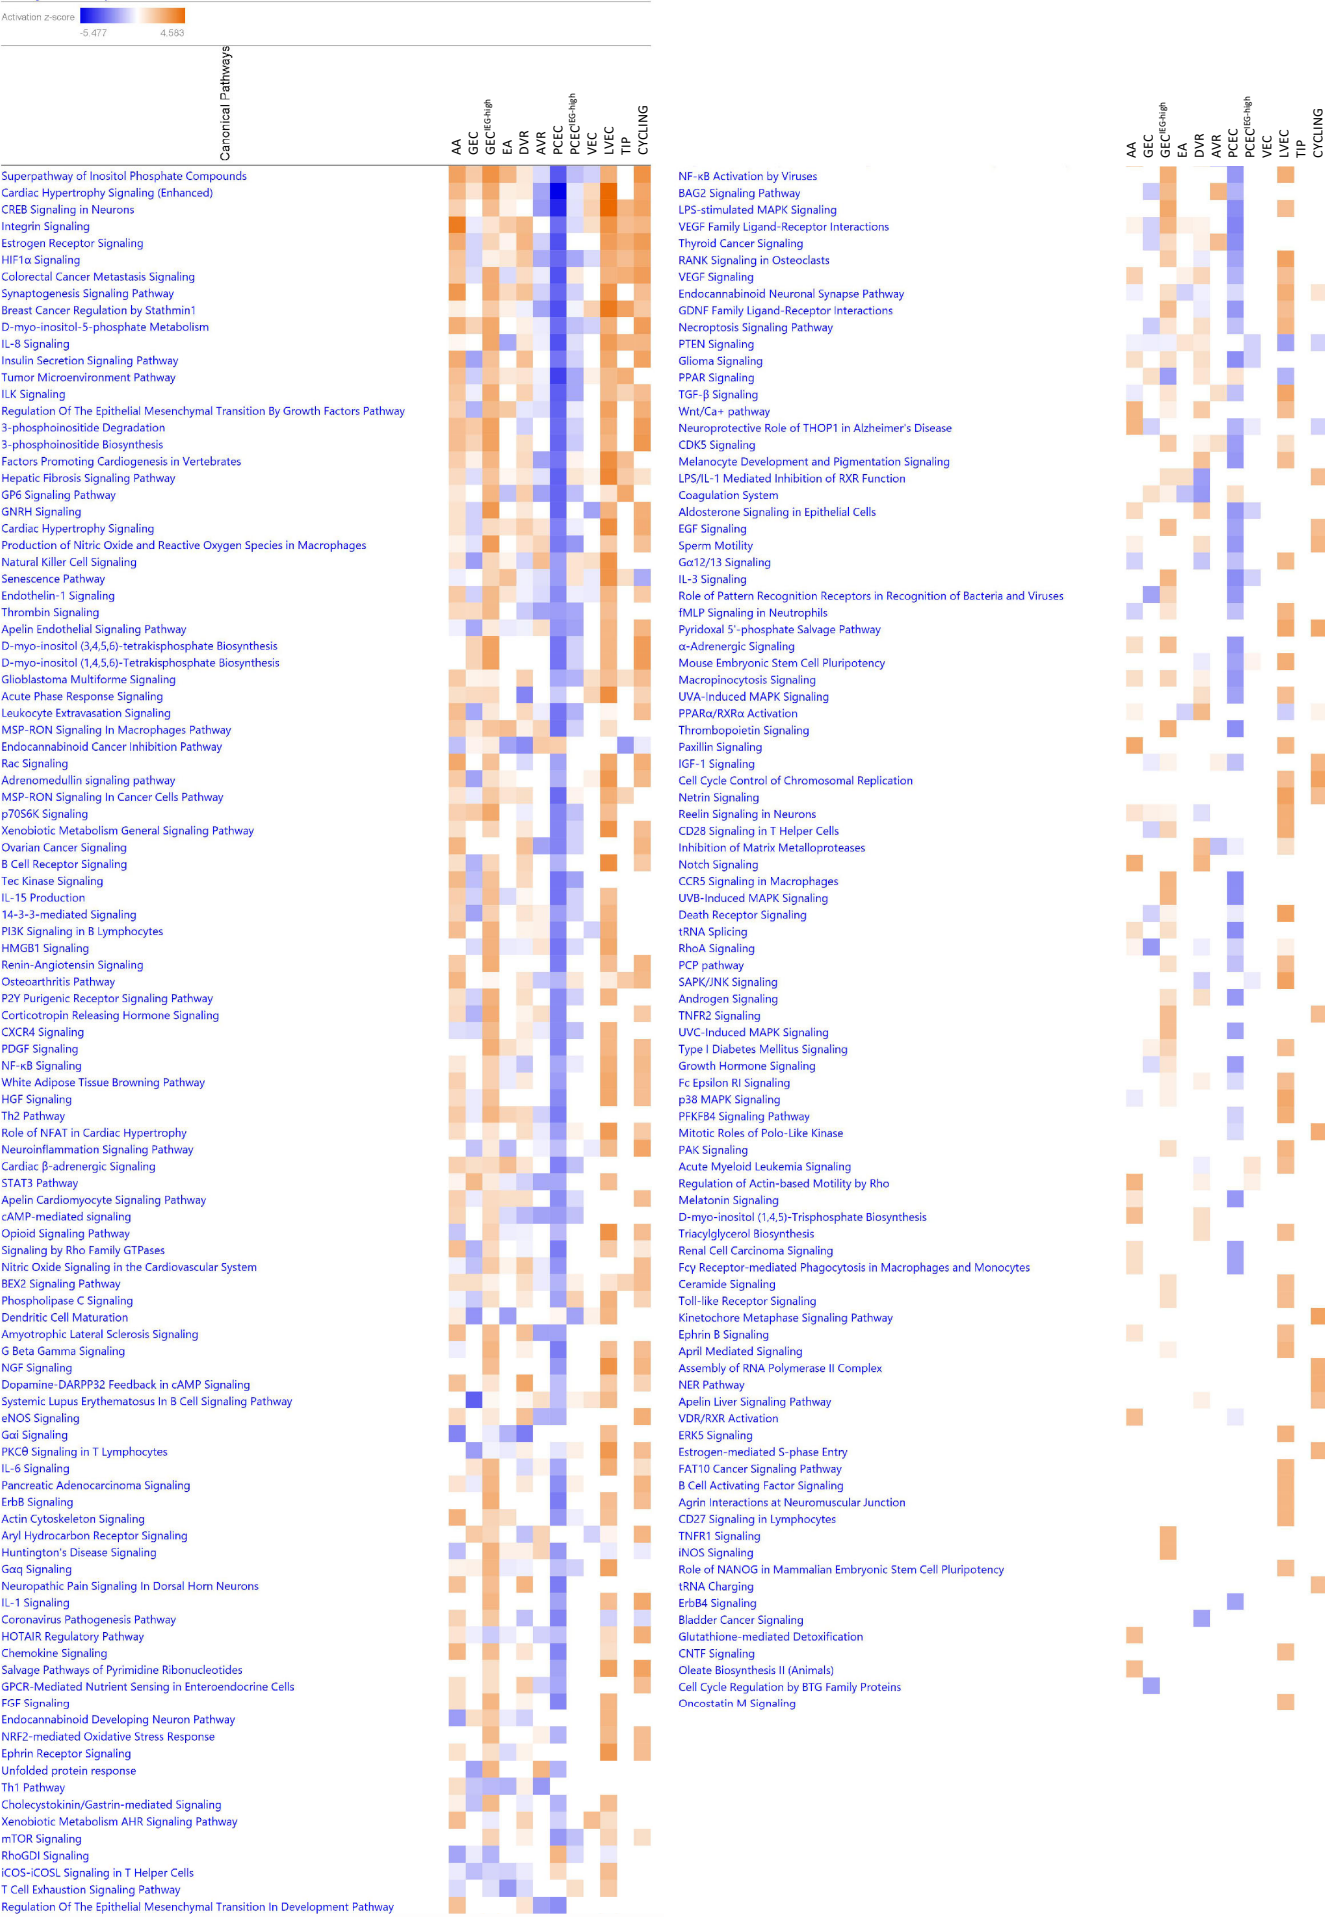

# PCEC Canonical pathways

PCEC 6\_11\_20 week

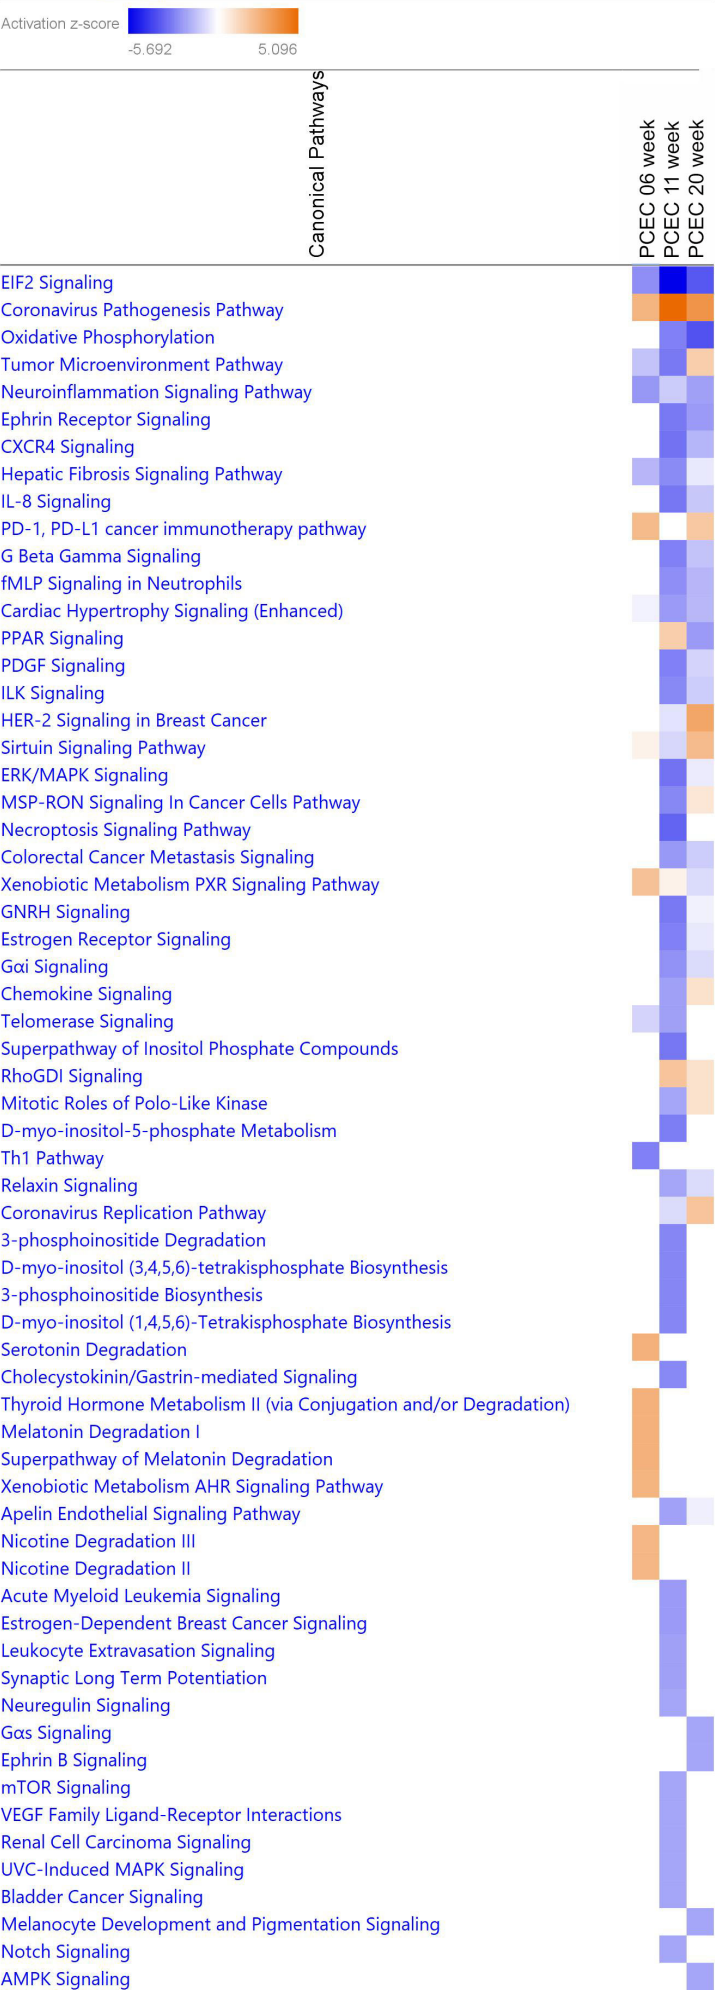

# PCEC Downstream effects

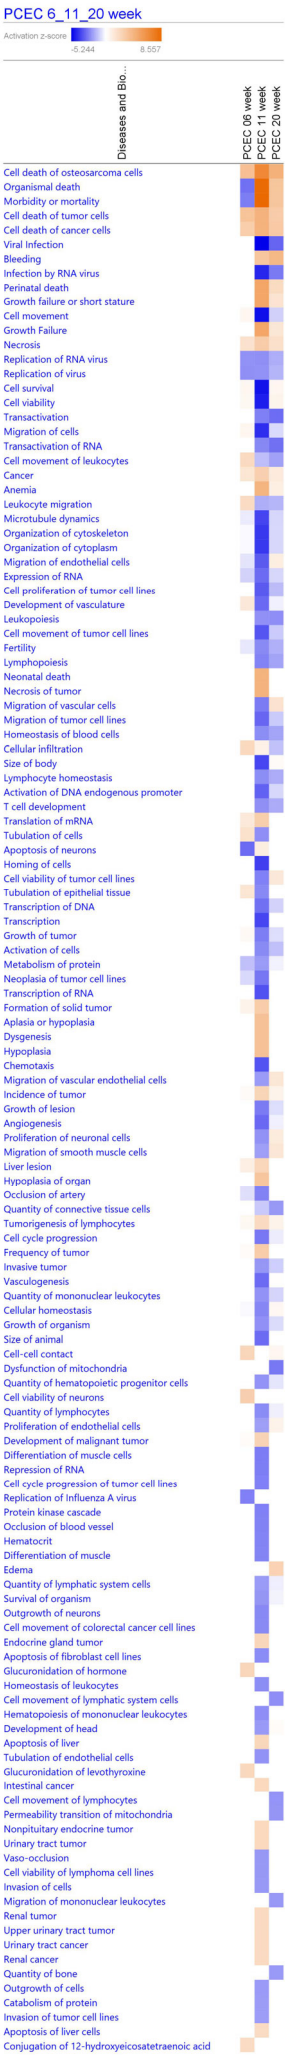

# PCEC Upstream regulators – growth factors

PCEC 6\_11\_20 week

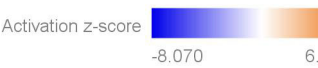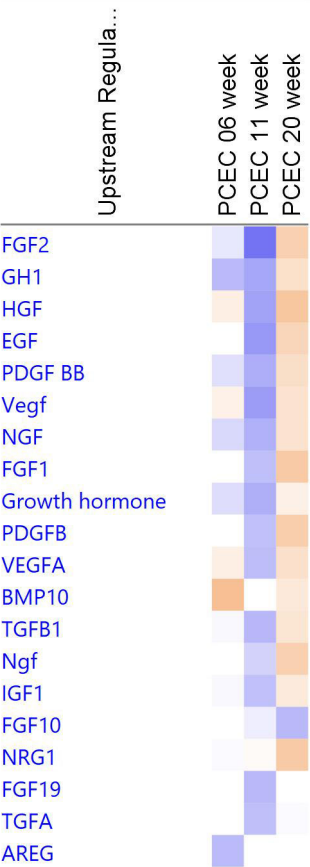

# PCEC Upstream regulators – transcription

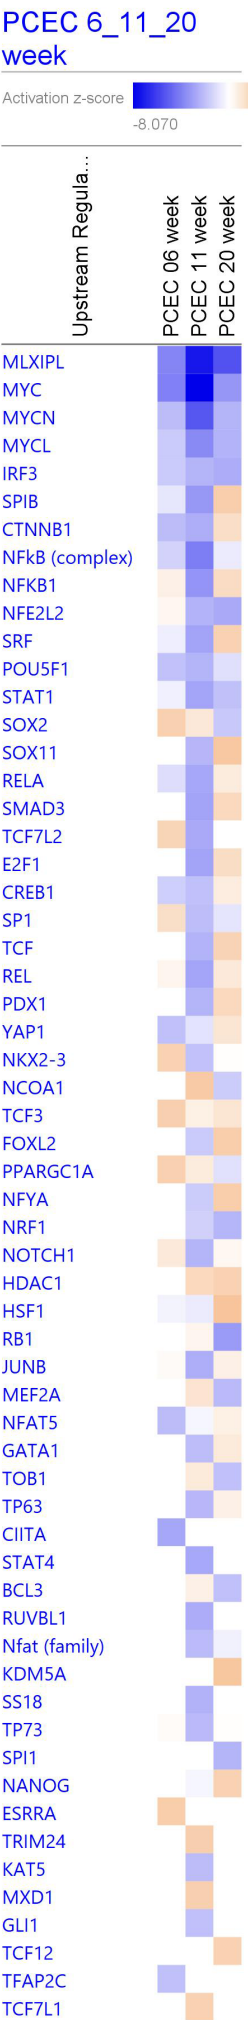

# GEC Canonical pathways

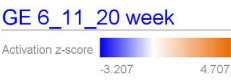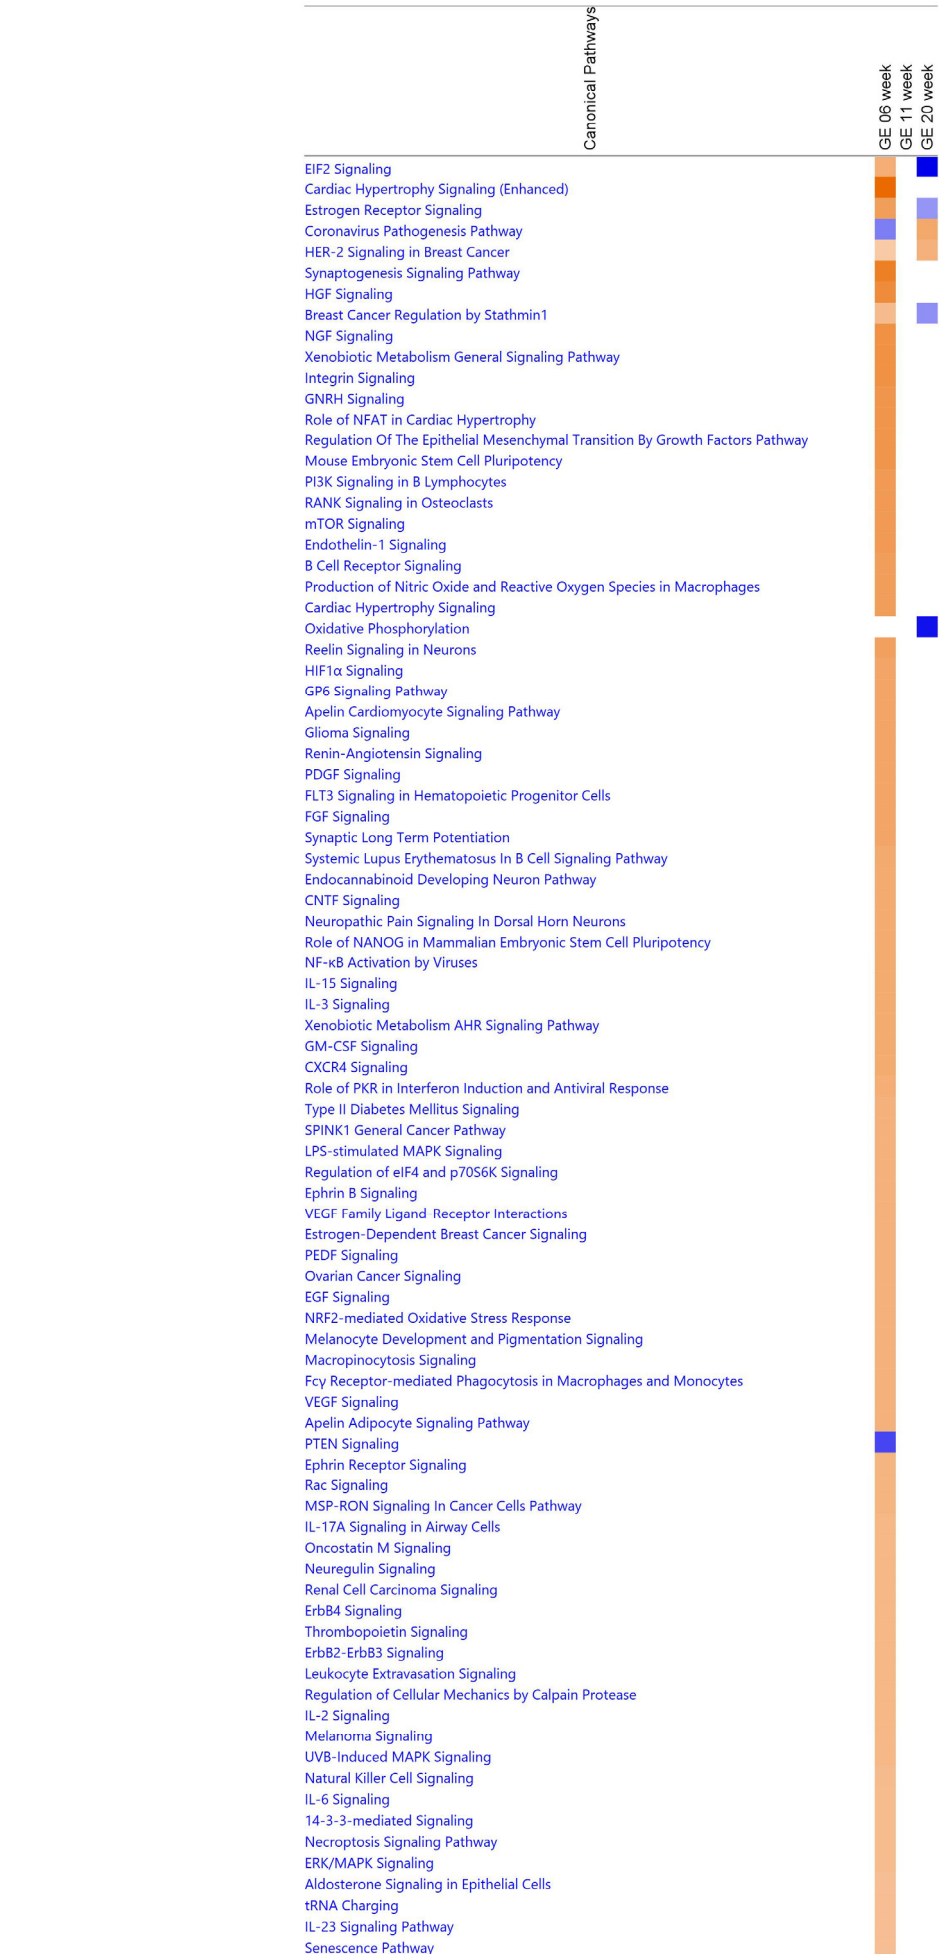

# GEC Downstream effects

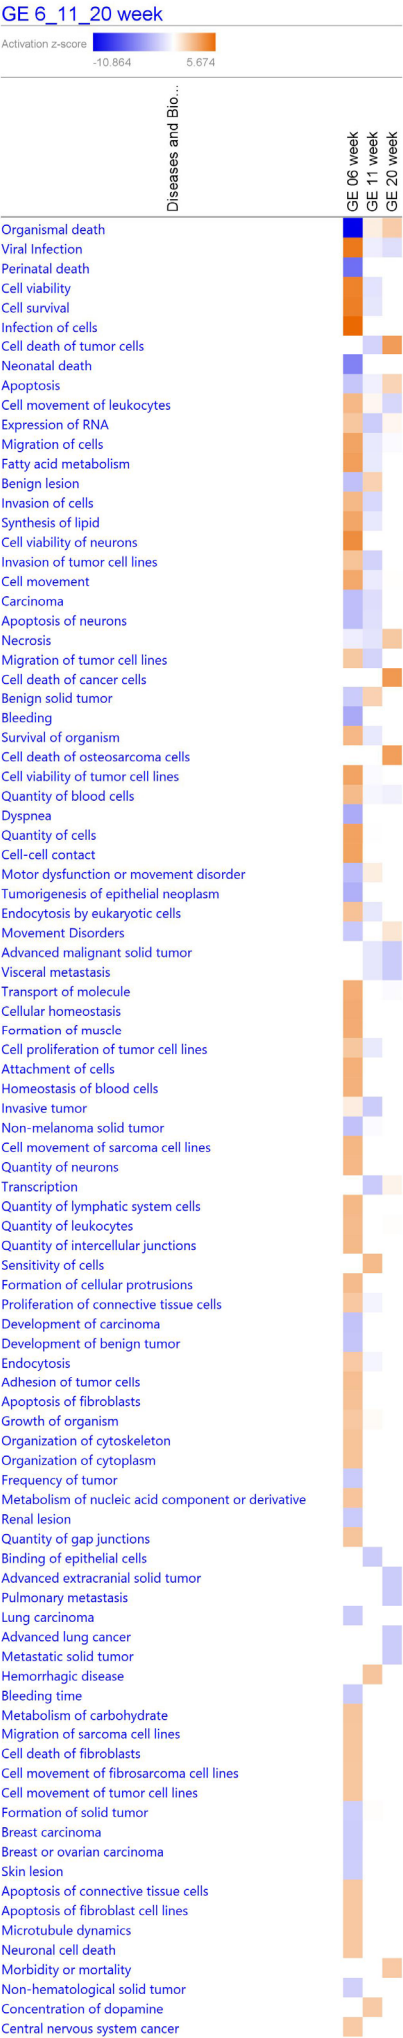

# GEC Upstream regulators – growth factors

GE 6\_11\_20 week

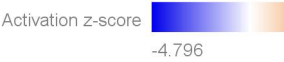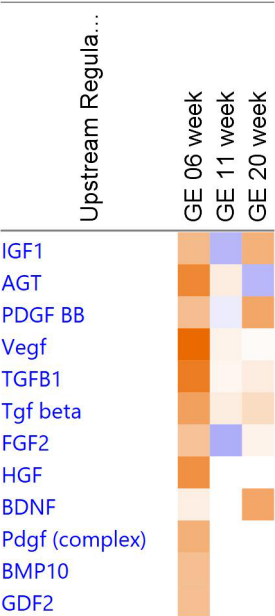

# GEC Upstream regulator - transcription

GE 6\_11\_20  
week

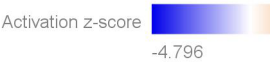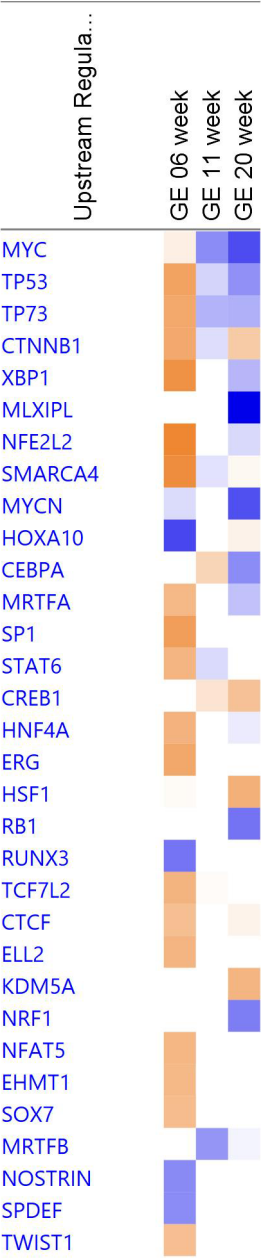

Supplement: Supplementary file 3 [file supplementary › IJMS_2920974_Supplementary Material/Supplemental File 2_IPA analysis all data.pdf]
