# Supplementary material for: Renal Endothelial Single-Cell Transcriptomics Reveals Spatiotemporal Regulation and Divergent Roles of Differential Gene Transcription and Alternative Splicing in Murine Diabetic Nephropathy
Source: Preprints.org preprint supplement (doi:10.20944/preprints202403.1481.v1), 2024-03-25
Supplement: Supplementary file 3 [file supplementary › IJMS_2920974_Supplementary Material/Supplemental File 3_ DEGs lean vs obese.xlsx]

## Sheet: 6w_11w_20w_GEC_PCEC
Genes	GE_6weeks_avg_logFC	GE_6weeks_pct.1	GE_6weeks_pct.2	GE_6weeks_p_val	GE_6weeks_p_val_adj	GE_11weeks_avg_logFC	GE_11weeks_pct.1	GE_11weeks_pct.2	GE_11weeks_p_val	GE_11weeks_p_val_adj	GE_20weeks_avg_logFC	GE_20weeks_pct.1	GE_20weeks_pct.2	GE_20weeks_p_val	GE_20weeks_p_val_adj	PCEC_6weeks_avg_logFC	PCEC_6weeks_pct.1	PCEC_6weeks_pct.2	PCEC_6weeks_p_val	PCEC_6weeks_p_val_adj	PCEC_11weeks_avg_logFC	PCEC_11weeks_pct.1	PCEC_11weeks_pct.2	PCEC_11weeks_p_val	PCEC_11weeks_p_val_adj	PCEC_20weeks_avg_logFC	PCEC_20weeks_pct.1	PCEC_20weeks_pct.2	PCEC_20weeks_p_val	PCEC_20weeks_p_val_adj
2010015M23Rik	-2.07697	0.185	0.746	7.62228e-31	2.26648e-26	-0.509969	0.475	0.664	3.3144e-05	0.985536	0.777666	0.395	0.213	9.795e-05	1	-1.19947	0.383	0.582	3.48391e-16	1.03594e-11	-0.224231	0.741	0.777	0.000702908	1	0.689891	0.61	0.432	7.31959e-16	2.17648e-11
Racgap1	0.746361	0.986	0.328	1.52786e-29	4.54309e-25	0.0840602	0.533	0.447	0.116074	1	-0.379268	0.662	0.991	4.19559e-14	1.24756e-09	-0.422629	0.959	0.593	5.64327e-08	0.00167803	-0.529989	0.311	0.328	0.351057	1	-0.252926	0.533	0.99	3.60198e-27	1.07105e-22
Dst	0.0315257	1	0.481	1.4088e-27	4.18906e-23	0.555771	0.582	0.61	0.790215	1	-0.412431	0.771	0.991	0.000124264	1	0.216498	0.996	0.657	1.97327e-23	5.86751e-19	0.494016	0.415	0.462	0.283746	1	0.616569	0.663	0.99	6.61427e-10	1.96675e-05
Gm37848	0.737042	0.993	0.619	1.09543e-24	3.25726e-20	0.0660458	0.803	0.893	0.979598	1	-0.262528	0.86	0.972	4.17396e-06	0.124113	0.731406	0.993	0.783	3.3321e-44	9.908e-40	-0.16695	0.722	0.838	0.000122191	1	-0.334736	0.742	0.935	3.39516e-15	1.00955e-10
Gm26785	-1.26506	0.212	0.709	2.09632e-24	6.2334e-20	-0.407727	0.467	0.623	0.000209848	1	0.788078	0.465	0.241	4.73367e-06	0.140756	-1.42589	0.227	0.569	1.63426e-26	4.85948e-22	-0.244772	0.67	0.747	0.000974996	1	0.933968	0.557	0.272	8.94571e-21	2.66001e-16
Nlgn1	0.524493	0.932	0.296	7.47857e-24	2.22375e-19	0.111507	0.467	0.421	0.446501	1	-0.23906	0.669	0.954	3.65293e-06	0.10862	-0.0229033	0.967	0.555	1.7524e-26	5.21075e-22	0.159961	0.276	0.323	0.265954	1	0.861885	0.536	0.973	5.08319e-24	1.51149e-19
D130019J16Rik	0.58449	0.89	0.28	1.15931e-22	3.44722e-18	-0.00875455	0.443	0.519	0.522544	1	-0.457805	0.548	0.898	9.56218e-13	2.84331e-08	0.676483	0.892	0.396	2.20699e-37	6.5625e-33	-0.0835232	0.302	0.39	0.0221571	1	-0.237121	0.455	0.871	7.95594e-27	2.3657e-22
Prr15	1.10884	0.671	0.159	2.1724e-21	6.45965e-17	-0.103664	0.27	0.327	0.517948	1	-0.158089	0.242	0.324	0.083596	1	1.0408	0.639	0.128	6.87006e-49	2.04281e-44	-0.278226	0.218	0.32	0.000497025	1	-0.180603	0.254	0.296	0.182215	1
Plvap	0.679933	1	1	2.76064e-19	8.20876e-15	0.625083	1	1	0.000244673	1	-0.208749	1	1	0.959022	1	0.104825	1	1	0.00729876	1	0.215656	1	1	7.55721e-15	2.24714e-10	0.0636106	1	1	0.215142	1
Gm14148	0.76188	0.795	0.254	3.46553e-19	1.03047e-14	0.333508	0.443	0.34	0.0094049	1	-0.126182	0.611	0.787	0.0459431	1	0.388808	0.829	0.493	7.54552e-13	2.24366e-08	0.120526	0.244	0.244	0.685421	1	-0.512882	0.414	0.789	2.10587e-18	6.2618e-14
Gm26766	0.590196	0.76	0.243	5.07877e-19	1.51017e-14	0.0676326	0.484	0.387	0.153443	1	-0.569672	0.503	0.926	1.85199e-14	5.50689e-10	0.0713979	0.796	0.533	7.58277e-05	1	-0.210421	0.229	0.302	0.00326773	1	-0.465167	0.481	0.932	3.81616e-25	1.13473e-20
C230088H06Rik	-0.621667	0.199	0.698	6.9868e-19	2.07753e-14	-0.180572	0.451	0.616	0.00976949	1	0.473912	0.369	0.083	1.26755e-07	0.00376906	-0.575739	0.182	0.467	1.32074e-14	3.92722e-10	0.0409282	0.666	0.672	0.522562	1	0.484839	0.483	0.102	1.60038e-25	4.75874e-21
Bgn	1.23449	0.925	0.608	1.68192e-18	5.00119e-14	1.90123	0.943	0.852	4.03915e-18	1.20104e-13	-0.449624	0.936	0.963	0.0139283	1	0.442187	0.952	0.838	9.48442e-06	0.282019	0.558486	0.931	0.905	4.04815e-13	1.20372e-08	-0.102357	0.938	0.915	0.153134	1
Gm26825	-0.419293	1	1	3.24258e-17	9.64181e-13	0.0463124	1	0.987	0.468034	1	0.365955	1	0.991	2.5642e-10	7.62463e-06	-0.230467	0.989	0.982	1.14294e-07	0.00339852	0.239409	0.976	0.962	1.843e-10	5.48017e-06	0.375287	0.99	0.986	1.13238e-19	3.36714e-15
Mbtd1	0.652172	0.918	0.487	1.22146e-16	3.632e-12	-0.826971	0.508	0.503	0.914961	1	-0.229117	0.624	0.954	1.16487e-11	3.46374e-07	-0.440274	0.903	0.668	0.0131693	1	0.0816077	0.347	0.436	0.0011204	1	-0.428802	0.596	0.949	6.74925e-16	2.00689e-11
Gm15459	-0.402491	1	1	2.15086e-16	6.39559e-12	0.0419045	0.992	0.984	0.517929	1	0.358557	1	0.991	4.75961e-10	1.41527e-05	-0.189777	0.989	0.976	8.22479e-06	0.244564	0.228945	0.97	0.96	5.13508e-10	1.52691e-05	0.369113	0.99	0.98	3.79026e-20	1.12703e-15
Slx1b	0.56989	0.842	0.376	2.93579e-16	8.72958e-12	0.346383	0.648	0.714	0.383394	1	-0.125338	0.624	0.398	0.000827142	1	0.19428	0.844	0.507	9.51499e-17	2.82928e-12	-0.459973	0.649	0.759	1.89155e-05	0.562453	0.142924	0.708	0.446	2.50212e-09	7.44004e-05
A430010J10Rik	0.554988	0.644	0.19	3.13795e-16	9.33069e-12	0.135245	0.254	0.296	0.7311	1	-0.181148	0.217	0.398	0.00293905	1	0.661157	0.621	0.166	1.73429e-35	5.15691e-31	-0.155141	0.201	0.251	0.119845	1	-0.137515	0.189	0.282	0.00611621	1
Siglec1	0.815669	0.781	0.407	4.25434e-16	1.26503e-11	-0.289234	0.377	0.519	0.00515658	1	-0.286584	0.516	0.843	2.35809e-06	0.0701178	0.102261	0.662	0.58	0.0291197	1	-0.513775	0.173	0.426	5.67775e-20	1.68828e-15	-0.219063	0.519	0.772	1.12122e-07	0.00333394
6330403N20Rik	-0.65902	0.034	0.429	5.39006e-16	1.60273e-11	-0.362599	0.033	0.182	6.18195e-05	1	0.10932	0.166	0.083	0.0557719	1	-0.571219	0.041	0.279	2.20786e-15	6.56507e-11	-0.152547	0.124	0.206	0.000307747	1	0.333079	0.234	0.041	1.94766e-12	5.79136e-08
Hspa8	-0.385936	1	0.995	1.29651e-15	3.85516e-11	0.0305715	1	0.991	0.549584	1	0.385285	0.994	1	5.95344e-11	1.77026e-06	-0.181205	0.996	0.998	1.26507e-05	0.376169	0.219373	0.989	0.976	9.14788e-09	0.000272012	0.36146	0.993	0.986	1.54437e-18	4.59217e-14
Acadsb	0.608356	0.671	0.243	1.5026e-15	4.46798e-11	0.158941	0.443	0.34	0.0960466	1	-0.131465	0.439	0.537	0.0981992	1	0.532297	0.654	0.465	5.95694e-07	0.017713	0.0429389	0.304	0.325	0.64736	1	-0.166453	0.467	0.514	0.334755	1
Dock10	0.57291	0.959	0.513	3.78446e-15	1.12531e-10	-0.127522	0.598	0.792	0.0323447	1	-0.21128	0.624	0.861	0.000267718	1	0.541877	0.926	0.615	4.19048e-28	1.24604e-23	-0.130618	0.546	0.668	0.00259156	1	-0.474965	0.569	0.867	6.065e-22	1.80343e-17
Tgm2	0.631447	0.979	0.873	3.79256e-15	1.12772e-10	0.583377	0.902	0.95	0.00361173	1	0.197062	0.987	0.935	0.735012	1	0.312613	0.996	0.949	3.63552e-07	0.0108102	0.424557	0.957	0.959	3.53405e-09	0.000105085	-0.252561	0.978	0.983	8.86806e-06	0.263692
Sost	1.1188	0.596	0.18	5.82511e-15	1.7321e-10	1.14649	0.607	0.336	5.70482e-08	0.00169633	-0.292571	0.561	0.843	3.71634e-05	1	0.881944	0.554	0.25	3.31857e-18	9.86776e-14	2.0151	0.454	0.162	1.06491e-29	3.16652e-25	-0.950429	0.519	0.776	1.68656e-17	5.01498e-13
Basp1	-0.483844	0.007	0.349	2.0461e-14	6.08408e-10	-0.458324	0.041	0.22	8.15678e-06	0.242542	-0.224388	0.108	0.009	0.00189789	1	-0.453924	0.004	0.226	2.54255e-16	7.56028e-12	-0.46634	0.068	0.211	3.25781e-12	9.68709e-08	0.259068	0.158	0.003	3.4726e-12	1.03258e-07
Ctcfl	0.553812	0.918	0.741	2.95269e-14	8.77983e-10	-0.335897	0.557	0.739	7.93442e-05	1	-0.60148	0.726	1	7.49308e-18	2.22807e-13	0.465609	0.967	0.805	1.44451e-21	4.29526e-17	-0.454515	0.458	0.662	2.62556e-14	7.80711e-10	-0.526513	0.766	0.983	2.09893e-33	6.24116e-29
Txndc5	1.02873	0.781	0.339	3.09374e-14	9.19923e-10	0.337699	0.516	0.563	0.845378	1	-0.510985	0.548	0.676	0.00422193	1	0.563159	0.565	0.442	0.000163583	1	0.369367	0.33	0.381	0.237206	1	0.430061	0.426	0.473	0.307424	1
Ivd	-0.869442	0.479	0.101	3.68706e-14	1.09635e-09	-0.303972	0.221	0.245	0.737184	1	-1.40173	0.306	0.537	0.000138676	1	0.802519	0.416	0.305	0.00215388	1	0.595612	0.188	0.253	0.0187824	1	0.26226	0.299	0.524	7.06525e-08	0.00210085
Serpine2	0.992235	0.904	0.683	4.92382e-14	1.4641e-09	1.19265	0.877	0.742	2.97715e-07	0.00885257	-0.388958	0.917	0.963	0.00109413	1	0.391675	0.959	0.918	2.24712e-06	0.066818	0.607166	0.904	0.832	1.85838e-12	5.5259e-08	0.178016	0.978	0.976	0.209375	1
Rabgap1	0.214018	0.712	0.296	5.44187e-14	1.61814e-09	0.783142	0.434	0.415	0.211621	1	0.679366	0.471	0.463	0.756097	1	-0.240192	0.71	0.509	3.50477e-07	0.0104214	0.181741	0.287	0.34	0.0812881	1	-0.495738	0.404	0.466	0.0489105	1
Hsp90ab1	-0.43987	1	1	6.95766e-14	2.06886e-09	-0.204055	1	1	0.000433667	1	0.463068	1	1	2.45809e-10	7.30912e-06	-0.335264	1	1	4.53894e-11	1.34965e-06	-0.000334989	0.996	1	0.666802	1	0.315911	0.998	1	2.52423e-08	0.000750581
Ap2a1	1.47362	0.651	0.254	1.10842e-13	3.29589e-09	0.0178456	0.615	0.572	0.662855	1	0.202073	0.503	0.481	0.929657	1	-0.231098	0.572	0.518	0.20707	1	-0.120023	0.452	0.447	0.776994	1	-0.161258	0.443	0.469	0.488216	1
Hspb1	-0.577603	0.973	1	1.25056e-13	3.71854e-09	-0.407635	0.984	0.984	3.37121e-05	1	0.156844	0.968	0.963	0.045258	1	-0.49115	0.989	1	1.2604e-15	3.74779e-11	-0.248555	0.949	0.983	5.66541e-07	0.0168461	0.0504445	0.94	0.997	0.806176	1
Itfg3	1.23426	0.589	0.206	1.32709e-13	3.94611e-09	-0.0608352	0.369	0.324	0.396342	1	-0.0880132	0.401	0.426	0.661487	1	0.582695	0.572	0.345	3.6152e-09	0.000107498	0.437028	0.336	0.318	0.174806	1	-0.105001	0.349	0.459	0.00551559	1
Gm12158	-0.561046	0.438	0.767	1.61878e-13	4.81344e-09	-0.133491	0.623	0.651	0.474412	1	0.0792527	0.548	0.389	0.00105302	1	-0.178064	0.442	0.635	1.7053e-08	0.000507072	-0.325564	0.608	0.663	0.183823	1	0.37354	0.572	0.306	7.30437e-15	2.17195e-10
Fbln5	0.831552	0.884	0.698	1.84618e-13	5.48963e-09	-0.208546	0.516	0.77	7.7929e-07	0.0231722	-0.2712	0.873	0.87	0.82744	1	-0.175066	0.892	0.874	0.305711	1	0.0301388	0.484	0.703	1.98667e-14	5.90736e-10	0.391349	0.84	0.789	7.51022e-05	1
Eln	0.852856	0.705	0.339	2.1411e-13	6.36657e-09	0.0253068	0.27	0.34	0.184528	1	-0.362983	0.376	0.435	0.305285	1	0.160616	0.625	0.595	0.0110945	1	-0.295019	0.203	0.273	0.00724732	1	-0.433315	0.335	0.401	0.0615153	1
Rgcc	0.381325	0.973	0.942	2.30631e-13	6.85781e-09	1.0934	0.943	0.921	1.24087e-13	3.68973e-09	-0.831675	0.93	1	6.62916e-15	1.97118e-10	0.01376	1	0.998	0.239338	1	0.357964	0.994	0.969	1.52506e-13	4.53476e-09	-0.430393	0.995	1	5.69545e-15	1.69354e-10
Pld3	0.452147	0.767	0.344	2.56741e-13	7.63419e-09	0.6319	0.631	0.645	0.283349	1	0.495369	0.58	0.611	0.875828	1	-0.0681444	0.695	0.646	0.60467	1	0.429744	0.587	0.567	0.0633784	1	0.0002977	0.651	0.697	0.266271	1
Ucp2	0.652691	1	0.825	2.62395e-13	7.80232e-09	0.699805	0.992	0.975	6.18273e-19	1.83843e-14	-0.408608	0.975	1	1.19363e-06	0.0354926	0.608991	0.985	0.856	2.0195e-15	6.00497e-11	0.927276	0.977	0.911	1.72197e-34	5.12029e-30	-0.395582	0.969	0.993	3.3511e-08	0.00099645
Aldh3a2	0.776003	0.767	0.36	3.17645e-13	9.44518e-09	0.109504	0.475	0.437	0.475192	1	0.177173	0.535	0.556	0.605151	1	0.263893	0.647	0.602	0.109961	1	0.276713	0.426	0.419	0.595149	1	0.261965	0.584	0.514	0.096031	1
Fuz	0.750914	0.589	0.201	3.89116e-13	1.15704e-08	0.29456	0.426	0.44	0.845007	1	-0.00284926	0.408	0.407	0.819505	1	-0.131851	0.45	0.44	0.907004	1	0.00673808	0.332	0.38	0.202231	1	0.35112	0.395	0.347	0.3336	1
Fkbp10	1.04298	0.521	0.143	5.46554e-13	1.62518e-08	0.810986	0.434	0.314	0.0050995	1	0.126737	0.268	0.38	0.0630533	1	1.00528	0.528	0.283	9.72292e-12	2.89111e-07	0.342237	0.287	0.311	0.581025	1	-0.426908	0.328	0.408	0.0268167	1
Gm28960	-0.511542	0.027	0.349	7.43113e-13	2.20965e-08	-0.15967	0.09	0.138	0.161913	1	0.170496	0.134	0.037	0.00855102	1	-0.421326	0.026	0.195	1.03646e-10	3.08192e-06	-0.123755	0.139	0.211	0.00195299	1	0.188966	0.184	0.014	2.02913e-12	6.03363e-08
Gm9443	0.496317	0.685	0.275	7.8045e-13	2.32067e-08	-0.230312	0.393	0.635	0.000260141	1	-0.0572175	0.293	0.37	0.240514	1	0.470648	0.695	0.274	2.07101e-25	6.15814e-21	-0.209417	0.407	0.538	2.70924e-05	0.805592	-0.203125	0.234	0.388	1.55899e-05	0.463567
S100a4	0.802112	0.699	0.317	1.32398e-12	3.93686e-08	0.177724	0.377	0.513	0.0420993	1	-0.242347	0.439	0.685	0.00634801	1	-0.128263	0.61	0.558	0.166225	1	0.411903	0.265	0.354	0.00297542	1	-0.357559	0.467	0.707	3.07864e-05	0.915433
Tril	1.67164	0.521	0.169	1.3547e-12	4.02821e-08	-0.21903	0.344	0.39	0.43689	1	0.23382	0.42	0.324	0.0519031	1	0.519135	0.554	0.502	0.10086	1	0.00711419	0.462	0.505	0.387832	1	0.210784	0.495	0.449	0.283708	1
Pxdn	0.730768	0.87	0.524	1.42558e-12	4.23897e-08	0.417156	0.689	0.682	0.179445	1	-0.166155	0.682	0.806	0.00888822	1	0.610014	0.773	0.622	1.39758e-06	0.0415572	0.314224	0.503	0.503	0.25307	1	-0.43291	0.591	0.711	5.95559e-05	1
Pxn	0.531781	0.699	0.307	1.75402e-12	5.21558e-08	0.376526	0.508	0.484	0.752717	1	0.0612361	0.554	0.62	0.222107	1	0.539572	0.721	0.608	0.000925978	1	-0.0586487	0.503	0.538	0.424974	1	-0.351379	0.557	0.738	1.68975e-06	0.0502448
St6galnac4	0.869419	0.808	0.434	1.83854e-12	5.4669e-08	0.152021	0.664	0.616	0.632992	1	0.396905	0.611	0.704	0.556656	1	0.0785053	0.807	0.715	0.219101	1	0.337295	0.653	0.617	0.0252265	1	0.0314523	0.691	0.684	0.901302	1
Lbp	1.25354	0.521	0.164	2.25329e-12	6.70017e-08	1.30864	0.385	0.314	0.0520292	1	-0.333759	0.236	0.407	0.000904324	1	0.558906	0.591	0.498	0.00325113	1	0.595738	0.522	0.364	9.38204e-09	0.000278975	0.00940687	0.419	0.435	0.14981	1
Zbtb16	0.751765	0.459	0.106	3.07112e-12	9.13199e-08	0.257402	0.139	0.082	0.0718305	1	-0.0774773	0.172	0.259	0.109469	1	1.52323	0.446	0.08	7.99495e-31	2.3773e-26	-0.273048	0.107	0.055	0.00112719	1	0.135164	0.222	0.15	0.014546	1
Cdv3	-0.0717677	0.897	0.46	3.65228e-12	1.08601e-07	-0.312151	0.402	0.403	0.737079	1	0.375174	0.567	0.815	0.00845897	1	-0.185106	0.881	0.489	2.53237e-17	7.53e-13	-0.378596	0.272	0.354	0.05852	1	-0.242985	0.452	0.759	1.23732e-12	3.67916e-08
Lasp1	0.832972	0.842	0.476	5.27723e-12	1.56918e-07	0.249333	0.697	0.808	0.185549	1	-0.00170931	0.694	0.787	0.0324614	1	0.321976	0.81	0.721	0.105523	1	-0.231504	0.659	0.82	7.19538e-07	0.0213955	-0.0343232	0.722	0.752	0.0283538	1
Twsg1	1.57463	0.541	0.196	5.50807e-12	1.63783e-07	0.196708	0.254	0.274	0.708591	1	0.515264	0.344	0.361	0.833282	1	0.278853	0.546	0.467	0.0537132	1	0.260904	0.248	0.277	0.423642	1	-0.250187	0.402	0.422	0.931028	1
Ak1	1.61231	0.397	0.085	1.01207e-11	3.00938e-07	1.51496	0.287	0.116	1.47825e-05	0.439556	-1.08649	0.153	0.454	1.98525e-08	0.000590314	0.946996	0.431	0.164	2.42006e-15	7.19606e-11	0.575502	0.189	0.103	5.29396e-05	1	-0.693393	0.151	0.357	1.02848e-10	3.0582e-06
Edn1	0.691784	0.61	0.27	1.10204e-11	3.2769e-07	-0.0968219	0.336	0.541	0.000145682	1	-0.740892	0.49	0.611	0.00426293	1	-0.45717	0.647	0.533	0.0291563	1	0.313199	0.259	0.43	1.54415e-08	0.000459153	-0.311968	0.5	0.503	0.623239	1
Gm28641	-0.503802	0.027	0.317	1.3151e-11	3.91046e-07	0.131457	0.172	0.138	0.282217	1	0.204566	0.127	0.019	0.00164328	1	-0.3938	0.045	0.215	4.24033e-10	1.26086e-05	0.190649	0.276	0.198	0.000975135	1	0.326584	0.199	0.02	1.80957e-12	5.38075e-08
Slco2a1	0.763901	0.925	0.698	1.68139e-11	4.99961e-07	0.698542	0.82	0.884	0.000138187	1	-0.009031	0.924	0.944	0.510369	1	0.276303	0.829	0.75	0.000610925	1	0.113155	0.49	0.658	5.57503e-08	0.00165774	-0.112949	0.768	0.813	0.549847	1
Col18a1	0.821059	0.822	0.519	1.89367e-11	5.63082e-07	0.573965	0.689	0.717	0.0576665	1	-0.348863	0.732	0.852	0.00175133	1	-0.146953	0.677	0.6	0.000215318	1	-0.0264901	0.366	0.517	6.86187e-07	0.0204038	0.753819	0.505	0.561	0.738908	1
Eng	0.308102	1	1	1.92445e-11	5.72235e-07	0.346915	1	1	3.35389e-15	9.97278e-11	-0.0872101	1	1	0.0182229	1	0.297955	1	1	4.97228e-13	1.47851e-08	0.295639	1	1	1.27134e-21	3.78033e-17	-0.0695098	1	1	0.00841163	1
Rai14	1.09491	0.651	0.323	2.10156e-11	6.24898e-07	0.65602	0.434	0.381	0.155211	1	0.325397	0.618	0.593	0.987245	1	0.28772	0.706	0.619	0.000421897	1	0.380571	0.475	0.393	0.00238128	1	0.110153	0.665	0.68	0.688329	1
Plau	0.326608	0.699	0.328	2.61436e-11	7.77381e-07	0.178164	0.402	0.321	0.056666	1	-0.426532	0.382	0.537	0.00880489	1	-0.383128	0.81	0.345	3.32441e-23	9.88514e-19	0.249883	0.392	0.299	0.00118039	1	0.335601	0.371	0.568	1.63406e-05	0.485889
Sft2d2	1.46114	0.425	0.106	2.86314e-11	8.51356e-07	0.530503	0.311	0.198	0.0123202	1	0.059795	0.28	0.324	0.487859	1	0.561353	0.42	0.272	0.000118224	1	0.0899266	0.193	0.206	0.643695	1	-0.425036	0.237	0.344	0.00279197	1
Exoc2	0.894178	0.575	0.228	3.1316e-11	9.31181e-07	0.204717	0.262	0.217	0.320125	1	-0.60517	0.35	0.472	0.0328306	1	0.447359	0.532	0.473	0.124099	1	0.357704	0.225	0.213	0.464593	1	0.118601	0.409	0.367	0.330395	1
Igfbp3	0.153881	0.904	0.751	3.27031e-11	9.72426e-07	-0.135642	0.779	0.786	0.382501	1	-0.225884	0.873	0.917	0.233136	1	-0.0958369	0.914	0.931	0.278579	1	-0.238427	0.784	0.892	2.34622e-07	0.00697648	0.111851	0.916	0.925	0.459886	1
Gm23264	0.431472	0.226	0.005	3.6928e-11	1.09806e-06	-0.028652	0.025	0.047	0.291779	1	-0.117942	0.025	0.12	0.00206869	1	0.353878	0.249	0.1	9.09252e-08	0.00270366	-0.0903608	0.023	0.055	0.00555795	1	-0.109784	0.041	0.126	2.53576e-05	0.754007
Ano6	0.364655	0.849	0.587	6.50105e-11	1.93309e-06	-0.000298136	0.721	0.723	0.695403	1	-0.451271	0.828	0.843	0.0324832	1	0.400618	0.926	0.83	1.48035e-05	0.440182	0.0952259	0.709	0.708	0.736546	1	-0.148137	0.847	0.898	0.0036566	1
Sphk2	0.497428	0.623	0.228	6.85208e-11	2.03747e-06	0.131844	0.557	0.421	0.0057491	1	-0.892898	0.312	0.685	7.14807e-11	2.12548e-06	0.508389	0.569	0.496	0.017837	1	0.483348	0.366	0.308	0.00908697	1	-0.933091	0.287	0.595	6.51969e-18	1.93863e-13
Nsmf	0.994062	0.562	0.201	7.88814e-11	2.34554e-06	0.080171	0.328	0.349	0.781398	1	-0.316856	0.408	0.426	0.508538	1	0.261914	0.543	0.425	0.0357802	1	0.265014	0.323	0.335	0.961078	1	0.126788	0.467	0.459	1	1
Dusp6	0.58749	0.945	0.762	7.89002e-11	2.3461e-06	0.392935	0.885	0.855	0.0285334	1	0.108868	0.936	0.935	0.202347	1	0.102936	0.911	0.885	0.0439563	1	0.258124	0.844	0.869	0.0262941	1	0.283654	0.919	0.884	0.0589769	1
Add3	0.47772	0.842	0.434	8.09613e-11	2.40739e-06	0.307351	0.541	0.56	0.606939	1	0.190936	0.656	0.63	0.822405	1	0.41497	0.729	0.586	1.88221e-06	0.0559675	-0.0771513	0.351	0.397	0.170046	1	0.0222253	0.584	0.629	0.538384	1
RP23-326D6.5	0.773874	0.644	0.286	8.19185e-11	2.43585e-06	0.179784	0.344	0.459	0.0703205	1	-0.251376	0.401	0.611	0.0295706	1	-0.119605	0.58	0.496	0.0743514	1	0.410926	0.235	0.311	0.00869613	1	-0.361518	0.421	0.636	0.000106901	1
Serinc5	0.674109	0.418	0.101	8.71488e-11	2.59137e-06	0.403727	0.148	0.107	0.240028	1	-1.27621	0.146	0.296	0.00164907	1	1.05978	0.383	0.263	0.000729762	1	0.63421	0.101	0.096	0.744834	1	-0.790752	0.222	0.293	0.0237125	1
Rbm4b	-0.0260025	0.904	0.656	8.8925e-11	2.64419e-06	-0.894813	0.582	0.717	0.0062226	1	0.362504	0.707	0.787	0.771458	1	-0.307918	0.955	0.666	1.84785e-19	5.49459e-15	-0.398142	0.493	0.593	0.00621946	1	-0.500907	0.656	0.748	0.00171285	1
Vps37c	0.551863	0.637	0.28	9.30184e-11	2.7659e-06	-0.689473	0.377	0.447	0.108203	1	0.540075	0.51	0.481	0.693925	1	-0.0203707	0.55	0.551	0.499647	1	0.0967375	0.422	0.455	0.86651	1	0.104456	0.45	0.429	0.91937	1
Lyplal1	1.20353	0.26	0.021	9.4378e-11	2.80633e-06	0.553518	0.033	0.097	0.0307258	1	0.284349	0.064	0.102	0.296158	1	0.958233	0.216	0.1	2.45819e-05	0.730944	-1.59836	0.011	0.069	1.36031e-06	0.0404487	-0.554102	0.029	0.061	0.0323793	1
Mtch1	0.590593	0.911	0.556	1.00383e-10	2.98489e-06	0.148044	0.811	0.802	0.54501	1	-0.299688	0.783	0.796	0.161387	1	0.372093	0.87	0.757	0.00204974	1	0.262299	0.765	0.768	0.214827	1	-0.347438	0.667	0.769	0.00108897	1
Epas1	0.47177	1	0.995	1.06135e-10	3.15592e-06	0.240327	0.992	1	0.015524	1	-0.32579	0.994	1	1.37527e-05	0.408937	0.329697	0.996	0.987	5.59266e-09	0.000166298	0.117774	0.962	0.971	0.110393	1	-0.458922	0.998	1	4.69177e-11	1.3951e-06
Bmp4	1.05609	0.349	0.069	1.09271e-10	3.24916e-06	0.197036	0.164	0.182	0.710062	1	0.005939	0.204	0.176	0.579063	1	0.0453208	0.338	0.228	0.00117567	1	-0.789744	0.098	0.17	0.000882077	1	0.67082	0.211	0.194	0.632364	1
Mtmr11	1.0472	0.589	0.249	1.53162e-10	4.55427e-06	-0.39414	0.303	0.387	0.0476965	1	0.238675	0.484	0.454	0.875069	1	0.121783	0.535	0.454	0.0184643	1	0.337733	0.304	0.32	0.780979	1	0.164435	0.431	0.374	0.119993	1
Mettl9	0.565304	0.747	0.386	1.55874e-10	4.63491e-06	0.0471399	0.393	0.553	0.0178627	1	0.197256	0.611	0.583	0.769248	1	-0.187361	0.677	0.659	0.699872	1	-0.0157708	0.392	0.502	0.00124115	1	0.261626	0.656	0.616	0.353203	1
Kremen1	0.437697	0.541	0.185	1.62883e-10	4.84332e-06	0.593871	0.426	0.377	0.29615	1	-0.282769	0.382	0.389	0.596269	1	0.410561	0.457	0.4	0.0929807	1	0.0644382	0.251	0.301	0.077972	1	-0.212591	0.383	0.408	0.618312	1
Manea	1.24836	0.363	0.079	1.64331e-10	4.88638e-06	0.0226031	0.098	0.116	0.567852	1	-0.261856	0.159	0.287	0.0187514	1	0.264014	0.316	0.217	0.00417641	1	-0.0723673	0.107	0.098	0.625953	1	-0.71233	0.156	0.276	6.56193e-05	1
Fam214b	0.739693	0.473	0.138	1.71091e-10	5.08739e-06	-0.463394	0.246	0.311	0.160581	1	-0.298559	0.255	0.343	0.119181	1	0.00460383	0.394	0.292	0.0176237	1	-0.206183	0.143	0.206	0.00554529	1	-0.79283	0.242	0.347	0.000730517	1
2010012O05Rik	0.372653	0.644	0.27	1.75913e-10	5.23078e-06	0.0177195	0.369	0.355	0.782451	1	-0.654177	0.541	0.667	0.0193438	1	-0.0327536	0.565	0.454	0.048961	1	-0.433507	0.248	0.285	0.162739	1	-0.197505	0.409	0.575	3.18624e-05	0.947427
Sult1a1	0.441277	0.952	0.656	1.772e-10	5.26905e-06	0.992385	0.852	0.708	7.22951e-09	0.00021497	-0.683791	0.828	0.963	1.15132e-06	0.0342344	0.343807	0.974	0.876	6.38282e-09	0.000189793	0.442089	0.863	0.742	5.66046e-10	1.68314e-05	-0.221637	0.938	0.956	0.0032365	1
Add2	0.655427	0.685	0.302	1.82567e-10	5.42864e-06	0.333844	0.557	0.484	0.190348	1	-0.531757	0.427	0.667	5.89857e-05	1	0.625354	0.524	0.407	0.00611924	1	0.404829	0.353	0.294	0.00953702	1	-0.00440286	0.457	0.517	0.056546	1
Fchsd2	0.533748	0.603	0.222	1.91415e-10	5.69173e-06	0.414736	0.336	0.314	0.443173	1	0.689779	0.427	0.389	0.315965	1	-0.0700983	0.494	0.409	0.0389121	1	-0.0118867	0.143	0.194	0.0202262	1	-0.111173	0.266	0.286	0.741409	1
Mxd4	0.566308	0.945	0.656	1.94254e-10	5.77614e-06	0.469256	0.721	0.726	0.0102479	1	-0.555004	0.809	0.907	3.73574e-05	1	0.323571	0.851	0.785	0.00883645	1	0.104211	0.593	0.589	0.18543	1	-0.569468	0.833	0.912	1.93642e-09	5.75795e-05
Dgcr2	0.585723	0.836	0.566	2.20224e-10	6.54838e-06	0.364331	0.689	0.723	0.867738	1	-0.0364076	0.739	0.741	0.39076	1	0.184879	0.792	0.752	0.0972785	1	0.287778	0.7	0.715	0.765411	1	0.191851	0.73	0.707	0.64763	1
Mr1	0.80088	0.473	0.148	2.47762e-10	7.36721e-06	0.296373	0.197	0.233	0.524459	1	-0.12323	0.318	0.389	0.176185	1	-0.0312343	0.446	0.338	0.011969	1	-0.315183	0.161	0.194	0.166866	1	-0.194064	0.285	0.405	0.000534049	1
Fblim1	0.15219	0.384	0.09	2.71631e-10	8.07694e-06	0.556257	0.189	0.148	0.220223	1	0.21171	0.153	0.25	0.0557236	1	0.170639	0.357	0.325	0.250747	1	0.650738	0.165	0.139	0.148911	1	0.0388417	0.261	0.286	0.333739	1
Atp6v0a1	1.16725	0.432	0.122	2.80391e-10	8.33744e-06	-0.171908	0.27	0.267	0.982006	1	0.0486223	0.376	0.343	0.643071	1	0.463834	0.472	0.394	0.0281588	1	-0.0454612	0.221	0.216	0.893639	1	-0.193515	0.359	0.33	0.591271	1
Clptm1l	0.75862	0.795	0.455	3.02443e-10	8.99315e-06	-0.247583	0.484	0.623	0.00902602	1	0.270912	0.65	0.611	0.408164	1	0.21765	0.777	0.695	0.0227652	1	-0.224004	0.437	0.625	2.18644e-09	6.50137e-05	-0.0241789	0.632	0.643	0.516705	1
Dnmt1	0.862142	0.534	0.175	3.39714e-10	1.01014e-05	-0.084409	0.279	0.277	0.87224	1	0.583099	0.338	0.296	0.338232	1	0.648738	0.472	0.308	4.70778e-06	0.139986	-0.06473	0.242	0.261	0.661122	1	-0.429971	0.378	0.347	0.365712	1
Arhgef28	-0.00875293	0.527	0.185	3.80802e-10	1.13232e-05	-0.151889	0.098	0.22	0.00384385	1	0.480899	0.261	0.324	0.267638	1	0.218132	0.498	0.363	0.000617768	1	0.166912	0.135	0.204	0.00272578	1	0.0472929	0.313	0.235	0.0172057	1
Capn2	0.438473	0.966	0.698	3.93647e-10	1.17051e-05	0.0265389	0.762	0.868	0.221885	1	0.315192	0.892	0.889	0.331064	1	0.373576	0.907	0.819	5.02486e-06	0.149414	0.21884	0.762	0.811	0.797213	1	0.05579	0.916	0.895	0.417494	1
Mysm1	0.355268	0.63	0.265	4.04269e-10	1.20209e-05	0.268282	0.336	0.425	0.231874	1	-0.449871	0.529	0.648	0.00700824	1	-0.186166	0.621	0.533	0.0295291	1	0.140401	0.263	0.284	0.553355	1	-0.131653	0.505	0.616	0.00201663	1
Anapc16	0.389642	0.733	0.397	4.49899e-10	1.33777e-05	0.183615	0.541	0.582	0.955802	1	-0.350661	0.605	0.824	0.00177607	1	0.219563	0.717	0.644	0.0189395	1	-0.0193422	0.432	0.493	0.0912121	1	-0.140176	0.639	0.759	0.00121176	1
Sept9	0.507678	0.788	0.381	4.51528e-10	1.34262e-05	0.0958738	0.549	0.569	0.793026	1	0.68692	0.624	0.574	0.123477	1	0.722695	0.729	0.613	0.000372922	1	0.0662451	0.503	0.538	0.719558	1	-0.0924561	0.545	0.653	0.00093907	1
Cc2d1b	1.75713	0.253	0.026	4.59207e-10	1.36545e-05	0.501294	0.107	0.145	0.31096	1	-0.0182934	0.166	0.176	0.787679	1	0.703937	0.249	0.095	8.50242e-08	0.00252819	0.943734	0.146	0.101	0.0197272	1	0.186363	0.189	0.19	0.92048	1
Dll1	0.943099	0.61	0.28	4.81024e-10	1.43033e-05	-0.239596	0.336	0.346	0.522446	1	0.0632617	0.433	0.444	0.582637	1	0.759021	0.58	0.465	0.000193552	1	0.37918	0.304	0.335	0.38983	1	0.165715	0.457	0.429	0.408814	1
Gatsl3	0.55705	0.61	0.291	4.82444e-10	1.43455e-05	0.501966	0.385	0.406	0.916385	1	-0.483083	0.465	0.528	0.231388	1	0.958857	0.613	0.562	0.0262409	1	0.451679	0.437	0.43	0.224868	1	-0.0381215	0.565	0.534	0.63229	1
Gm37486	-0.985723	0.11	0.392	6.47679e-10	1.92587e-05	-0.429685	0.172	0.308	0.00311739	1	0.491137	0.363	0.241	0.0126798	1	-0.543683	0.126	0.232	7.3496e-05	1	-0.0238369	0.178	0.204	0.310793	1	0.562271	0.256	0.133	1.17915e-05	0.350619
Thbs2	1.0275	0.719	0.46	6.56396e-10	1.95179e-05	0.472007	0.295	0.484	0.000403159	1	0.588085	0.586	0.472	0.0372718	1	0.143107	0.736	0.675	0.0200113	1	-0.0605981	0.336	0.464	1.08528e-05	0.322708	0.00308031	0.553	0.558	0.7025	1
Dbp	1.18296	0.5	0.185	7.76434e-10	2.30873e-05	0.866751	0.525	0.327	5.2564e-06	0.156299	-2.2918	0.223	0.796	1.88717e-23	5.61151e-19	0.671704	0.454	0.449	0.614018	1	0.559332	0.315	0.196	6.85217e-07	0.0203749	-1.71038	0.179	0.697	4.05139e-44	1.20468e-39
Npr1	0.569151	0.966	0.709	7.98996e-10	2.37581e-05	0.367084	0.885	0.877	0.0289022	1	0.0137488	0.936	0.926	0.540151	1	0.399602	0.929	0.861	8.04559e-07	0.0239236	0.218898	0.891	0.881	0.0150193	1	-0.21411	0.923	0.946	0.0010661	1
Cnn2	0.489475	0.986	0.788	8.08876e-10	2.40519e-05	0.312678	0.91	0.921	0.0847044	1	-0.407403	0.866	0.944	0.00101029	1	0.130612	0.974	0.874	0.0126211	1	0.228784	0.859	0.861	0.038733	1	0.0504419	0.876	0.915	0.717649	1
Ak3	0.373323	0.747	0.413	9.5909e-10	2.85185e-05	0.225505	0.557	0.632	0.457611	1	0.0127404	0.541	0.556	0.733898	1	0.353692	0.777	0.657	0.00123979	1	0.192511	0.454	0.527	0.0605227	1	-0.0337677	0.574	0.578	0.978957	1
Rpa2	1.55265	0.329	0.069	9.71222e-10	2.88793e-05	0.818338	0.213	0.189	0.529687	1	-0.18519	0.191	0.222	0.505161	1	0.82724	0.357	0.21	3.61065e-05	1	-0.138104	0.15	0.158	0.833542	1	-0.73958	0.237	0.214	0.617423	1
Ttc5	0.227296	0.61	0.249	9.74309e-10	2.89711e-05	0.287185	0.336	0.318	0.546374	1	0.000415151	0.465	0.426	0.557093	1	0.11733	0.524	0.524	0.94181	1	0.19016	0.285	0.318	0.337678	1	0.457201	0.49	0.435	0.149722	1
Pcdhgb2	0.475462	0.781	0.413	9.82153e-10	2.92043e-05	-0.116071	0.492	0.553	0.613347	1	-0.0122547	0.669	0.694	0.396195	1	0.604811	0.736	0.575	3.38733e-09	0.000100722	-0.0673752	0.452	0.497	0.335935	1	-0.00798384	0.6	0.69	0.0362308	1
Dda1	0.343895	0.747	0.381	1.09115e-09	3.24453e-05	-0.194716	0.467	0.563	0.108386	1	0.242383	0.637	0.583	0.222663	1	0.0469461	0.665	0.681	0.831525	1	0.0753292	0.447	0.521	0.121168	1	0.0222764	0.579	0.599	0.984229	1
Pigq	0.75522	0.678	0.344	1.11125e-09	3.30429e-05	-0.365807	0.451	0.597	0.0188448	1	-0.0533004	0.624	0.62	0.322511	1	-0.0678775	0.639	0.591	0.640155	1	-0.131864	0.413	0.562	2.41274e-05	0.717429	-0.147972	0.579	0.602	0.567666	1
mt-Nd6	0.434564	0.959	0.746	1.1401e-09	3.39008e-05	-0.649801	0.738	0.896	1.28541e-07	0.00382216	-0.262034	0.93	0.954	0.0359174	1	0.136232	0.918	0.796	0.0149755	1	-0.812847	0.561	0.765	3.37284e-18	1.00291e-13	-0.138377	0.842	0.884	0.15	1
Sgk3	0.854711	0.555	0.254	1.20098e-09	3.57112e-05	1.18074	0.402	0.286	0.00471037	1	-0.111972	0.503	0.509	0.363388	1	0.298558	0.535	0.33	3.73501e-08	0.0011106	0.0510354	0.28	0.239	0.121719	1	-0.314914	0.416	0.463	0.148844	1
Dstyk	0.620644	0.678	0.333	1.20328e-09	3.57796e-05	0.0318085	0.361	0.399	0.493899	1	-0.500793	0.42	0.556	0.0167599	1	0.036541	0.565	0.531	0.314036	1	0.173716	0.291	0.356	0.0517709	1	-0.505331	0.471	0.605	0.000263016	1
Pnrc1	0.626331	0.856	0.497	1.20337e-09	3.57822e-05	-0.501203	0.508	0.648	0.00587453	1	-0.347663	0.682	0.806	0.0100197	1	0.216768	0.784	0.706	0.0392633	1	-0.328464	0.386	0.574	1.66047e-09	4.93742e-05	-0.228711	0.632	0.707	0.0258948	1
Igfbp4	0.683325	0.979	0.767	1.22256e-09	3.63527e-05	0.249152	0.975	0.956	0.11221	1	-0.0189056	0.936	0.926	0.535844	1	0.311631	0.914	0.836	0.0244659	1	0.570253	0.906	0.911	0.000789801	1	0.190531	0.883	0.912	0.964706	1
Ptgs1	0.548407	0.774	0.492	1.2463e-09	3.70587e-05	0.341972	0.623	0.679	0.592085	1	0.572491	0.72	0.583	0.00789507	1	0.270937	0.784	0.757	0.608529	1	0.202894	0.659	0.637	0.118399	1	0.357393	0.785	0.694	0.00206932	1
S100a6	0.493528	1	0.783	1.25314e-09	3.72622e-05	0.0901682	0.918	0.953	0.686737	1	-0.856492	0.911	0.981	4.30301e-15	1.2795e-10	0.0657762	0.903	0.816	0.00253906	1	0.132832	0.814	0.811	0.0168929	1	-0.68933	0.871	0.99	1.16294e-17	3.45801e-13
Mgat4b	0.750303	0.616	0.265	1.26888e-09	3.77301e-05	0.0499993	0.352	0.415	0.239928	1	0.103357	0.401	0.463	0.185276	1	0.240158	0.591	0.529	0.0805191	1	0.0381573	0.325	0.34	0.633915	1	-0.379165	0.409	0.381	0.7224	1
Armc5	1.63089	0.404	0.116	1.29602e-09	3.85372e-05	-0.516051	0.205	0.352	0.00438798	1	0.0223294	0.236	0.269	0.460571	1	0.17231	0.379	0.321	0.100193	1	0.142856	0.214	0.297	0.00456544	1	-0.4073	0.27	0.276	0.906456	1
Prex1	0.489613	0.753	0.418	1.31169e-09	3.90031e-05	0.116602	0.615	0.594	0.797773	1	-0.00879582	0.618	0.667	0.233066	1	0.111336	0.743	0.664	0.121414	1	0.136499	0.492	0.519	0.928886	1	-0.233739	0.656	0.731	0.0104222	1
Ltbp1	0.328256	0.726	0.402	1.37281e-09	4.08204e-05	-0.301003	0.443	0.528	0.122885	1	0.424927	0.688	0.565	0.173154	1	-0.0827038	0.703	0.675	0.338039	1	-0.0614169	0.386	0.46	0.0159211	1	0.12045	0.612	0.588	0.528586	1
Bace2	0.419826	0.548	0.212	1.40949e-09	4.19111e-05	0.419195	0.393	0.409	0.902814	1	-0.0723901	0.452	0.5	0.503725	1	0.385347	0.517	0.48	0.285387	1	-0.0641922	0.319	0.375	0.14348	1	0.0456897	0.395	0.446	0.215434	1
Golm1	-0.0746846	0.685	0.344	1.41905e-09	4.21954e-05	-0.668318	0.328	0.415	0.0705815	1	0.322434	0.459	0.37	0.214742	1	0.793569	0.721	0.56	3.32171e-08	0.000987712	-0.126336	0.315	0.4	0.00401129	1	0.450494	0.512	0.422	0.0119676	1
Stom	0.308557	0.76	0.519	1.48587e-09	4.41824e-05	0.346783	0.779	0.767	0.783233	1	0.134719	0.879	0.843	0.569801	1	0.397709	0.859	0.785	0.0090114	1	0.0286249	0.794	0.833	0.30906	1	0.186047	0.935	0.898	0.280656	1
Smg1	0.777941	0.562	0.222	1.50091e-09	4.46295e-05	0.27551	0.279	0.258	0.621824	1	0.397999	0.299	0.509	0.000945709	1	-0.0403743	0.506	0.46	0.335907	1	0.554177	0.251	0.234	0.318016	1	-0.224569	0.388	0.48	0.00883575	1
Atf6b	0.775864	0.658	0.344	1.5137e-09	4.50099e-05	0.392259	0.443	0.535	0.500984	1	0.0502553	0.541	0.519	0.812863	1	-0.224174	0.654	0.608	0.79033	1	0.200172	0.447	0.442	0.433511	1	-0.076601	0.529	0.548	0.46511	1
Gm12207	0.417348	0.452	0.138	1.53149e-09	4.5539e-05	0.00910736	0.311	0.258	0.253077	1	-0.429789	0.376	0.639	5.92772e-05	1	0.103121	0.476	0.363	0.0049413	1	-0.221223	0.128	0.201	0.000716389	1	-0.389252	0.275	0.619	1.19521e-16	3.55395e-12
Pcdhgc3	0.547152	0.774	0.434	1.54925e-09	4.60669e-05	0.0844575	0.541	0.582	0.985029	1	0.139518	0.707	0.704	0.751683	1	0.639375	0.758	0.593	2.91137e-09	8.65696e-05	-0.0263684	0.499	0.527	0.577212	1	0.0347573	0.648	0.687	0.238932	1
Ubc	-0.282498	0.993	1	1.56997e-09	4.66831e-05	-0.0744047	0.975	0.984	0.35344	1	0.348384	1	0.981	4.7106e-07	0.014007	-0.0945919	0.993	0.996	0.322568	1	0.0506552	0.953	0.99	0.793425	1	0.264436	0.981	0.98	0.00066202	1
Phrf1	1.05593	0.493	0.18	1.64131e-09	4.88043e-05	-0.238602	0.287	0.333	0.323028	1	0.547387	0.459	0.389	0.387284	1	0.566681	0.502	0.403	0.00186702	1	-0.0586377	0.278	0.251	0.266549	1	0.388524	0.423	0.306	0.00140137	1
Stk25	0.310727	0.808	0.439	1.65677e-09	4.92641e-05	-0.229063	0.541	0.616	0.034867	1	0.0176454	0.631	0.694	0.318144	1	-0.128864	0.74	0.726	0.615926	1	0.208262	0.492	0.531	0.48538	1	0.322654	0.639	0.694	0.970342	1
2510009E07Rik	1.12274	0.562	0.233	1.67477e-09	4.97992e-05	0.363461	0.352	0.283	0.156907	1	-0.179029	0.414	0.472	0.240505	1	0.163742	0.457	0.489	0.757388	1	0.876731	0.328	0.27	0.00981768	1	-0.579249	0.431	0.548	0.00109661	1
Inip	0.0122436	0.562	0.217	1.71056e-09	5.08635e-05	-0.295731	0.361	0.418	0.228743	1	0.0268651	0.376	0.417	0.574073	1	0.335665	0.595	0.407	2.03904e-06	0.0606307	0.106333	0.33	0.399	0.0138651	1	-0.059869	0.443	0.446	0.961723	1
Slc39a10	0.646864	0.644	0.296	1.73e-09	5.14415e-05	0.126371	0.393	0.399	0.866464	1	-0.238052	0.433	0.5	0.248521	1	0.18425	0.591	0.491	0.00658193	1	0.191949	0.306	0.325	0.754345	1	-0.345782	0.426	0.49	0.074576	1
Pcdhgb1	0.498237	0.774	0.413	1.79696e-09	5.34327e-05	-0.0248028	0.516	0.553	0.949801	1	0.108634	0.662	0.694	0.487827	1	0.537483	0.762	0.582	8.07327e-10	2.40059e-05	0.0104117	0.471	0.502	0.617105	1	0.0571831	0.615	0.704	0.0294815	1
Faap100	0.592163	0.466	0.164	1.80486e-09	5.36676e-05	0.140518	0.238	0.277	0.485482	1	0.777699	0.299	0.315	0.902115	1	0.192693	0.394	0.281	0.00502289	1	0.275165	0.201	0.253	0.114636	1	-0.0731354	0.368	0.31	0.158745	1
Mrpl43	0.760895	0.603	0.249	1.84973e-09	5.50017e-05	0.0688239	0.393	0.453	0.279291	1	-0.339895	0.401	0.519	0.0399147	1	-0.264959	0.532	0.476	0.18712	1	-0.226482	0.281	0.38	0.000805212	1	-0.343034	0.409	0.473	0.04821	1
Pcdhga5	0.492465	0.774	0.418	1.89164e-09	5.62479e-05	-0.0537614	0.5	0.557	0.731095	1	0.0369695	0.669	0.722	0.271199	1	0.544464	0.747	0.571	2.37559e-09	7.06381e-05	-0.0773886	0.447	0.498	0.20159	1	0.01809	0.6	0.677	0.07827	1
Ccng1	0.942307	0.438	0.138	2.02095e-09	6.00928e-05	-0.524971	0.205	0.255	0.213559	1	0.585295	0.376	0.389	0.800246	1	0.860756	0.401	0.361	0.264973	1	-0.0114598	0.199	0.218	0.518414	1	-0.123725	0.273	0.378	0.00456135	1
Camk2g	0.682948	0.479	0.185	2.05746e-09	6.11785e-05	-0.150136	0.205	0.277	0.127973	1	-0.35395	0.293	0.398	0.0440579	1	-0.382134	0.498	0.425	0.303969	1	0.200285	0.238	0.263	0.511341	1	0.0162292	0.349	0.384	0.381064	1
Gdpd5	0.72294	0.575	0.233	2.1818e-09	6.48758e-05	0.0580461	0.344	0.428	0.186964	1	-0.203601	0.376	0.528	0.0102345	1	0.666091	0.491	0.381	0.00766965	1	0.30347	0.317	0.333	0.646419	1	-0.0972528	0.359	0.439	0.126051	1
Mapk3	0.854851	0.877	0.545	2.22604e-09	6.61914e-05	0.195463	0.787	0.777	0.332679	1	-0.530941	0.752	0.852	0.00514708	1	0.0318743	0.822	0.741	0.527293	1	0.0656119	0.606	0.679	0.0844312	1	0.097622	0.73	0.741	0.954271	1
Asb8	0.918115	0.555	0.238	2.44454e-09	7.26884e-05	-0.00456774	0.303	0.377	0.107276	1	0.336153	0.439	0.417	0.891494	1	0.504653	0.561	0.471	0.0507654	1	0.0695074	0.235	0.313	0.00957384	1	-0.0640526	0.392	0.415	0.320125	1
Ifngr2	0.459273	0.712	0.37	2.51308e-09	7.47265e-05	-0.0736663	0.385	0.487	0.108549	1	0.143737	0.643	0.611	0.334513	1	0.375102	0.665	0.657	0.379779	1	-0.361872	0.398	0.505	8.24616e-05	1	0.179023	0.627	0.602	0.291564	1
Zcchc9	0.625522	0.699	0.376	2.54513e-09	7.56795e-05	0.00292908	0.475	0.431	0.308744	1	0.668881	0.548	0.648	0.201999	1	0.0765925	0.461	0.341	0.0095362	1	-0.373286	0.189	0.254	0.00900355	1	0.238693	0.321	0.286	0.391792	1
Arfgap1	0.737541	0.534	0.233	2.56556e-09	7.6287e-05	-0.196776	0.369	0.428	0.217251	1	0.201196	0.395	0.435	0.706459	1	0.156994	0.561	0.531	0.550991	1	0.196692	0.368	0.349	0.386407	1	-0.0864443	0.45	0.476	0.464843	1
Qsox1	0.436583	0.671	0.381	2.6251e-09	7.80573e-05	0.811411	0.631	0.443	3.56936e-05	1	-0.527641	0.605	0.787	0.00021298	1	0.444933	0.654	0.529	4.69436e-05	1	0.517479	0.394	0.345	0.0153008	1	-0.270441	0.636	0.711	0.000172394	1
Dpagt1	0.47322	0.774	0.423	2.64145e-09	7.85435e-05	0.0816896	0.672	0.664	0.939107	1	0.113011	0.65	0.731	0.509395	1	-0.00304712	0.71	0.684	0.782311	1	0.216121	0.488	0.524	0.755043	1	-0.137069	0.67	0.69	0.382445	1
Zbtb44	0.552624	0.788	0.503	2.8564e-09	8.49351e-05	0.113953	0.459	0.61	0.010146	1	-0.233548	0.599	0.833	1.8512e-05	0.550454	0.253718	0.758	0.513	3.60459e-13	1.07182e-08	-0.386967	0.349	0.473	2.97195e-05	0.883709	-0.0862459	0.598	0.772	1.86144e-08	0.000553498
Cant1	0.479583	0.76	0.455	2.85924e-09	8.50196e-05	0.341045	0.557	0.582	0.72703	1	-0.00751023	0.592	0.63	0.4207	1	0.205732	0.729	0.655	0.424002	1	0.0584264	0.497	0.577	0.0886037	1	-0.0951584	0.639	0.626	0.789467	1
Crim1	0.665416	0.418	0.122	2.97669e-09	8.85119e-05	-1.62289	0.18	0.179	0.98552	1	0.000161811	0.223	0.343	0.0184755	1	0.51971	0.454	0.363	0.00681037	1	0.0321194	0.21	0.289	0.00512441	1	-0.50976	0.323	0.439	0.000153913	1
Pald1	0.283278	0.575	0.243	2.98001e-09	8.86107e-05	-0.263772	0.492	0.415	0.264769	1	0.146054	0.382	0.407	0.581667	1	0.0824231	0.55	0.52	0.623634	1	0.209992	0.375	0.4	0.606865	1	0.237355	0.443	0.357	0.00745433	1
Eif5b	0.799145	0.644	0.312	3.04733e-09	9.06124e-05	-0.865933	0.303	0.447	0.00153694	1	-0.168515	0.516	0.722	0.00495932	1	0.106575	0.606	0.593	0.87226	1	-0.448055	0.246	0.393	1.86705e-07	0.00555167	-0.610215	0.56	0.605	0.0787359	1
Gm38211	0.606177	0.849	0.503	3.17397e-09	9.43781e-05	0.259584	0.41	0.601	0.011822	1	-0.135412	0.433	0.546	0.0835922	1	0.378715	0.781	0.392	1.76188e-20	5.23896e-16	-0.850152	0.465	0.593	0.000521899	1	-0.41664	0.373	0.575	6.30165e-07	0.018738
Atf2	0.474359	0.685	0.339	3.23796e-09	9.62808e-05	-0.00256219	0.328	0.45	0.0636668	1	-0.0510165	0.503	0.528	0.698315	1	0.47636	0.621	0.509	0.000209785	1	-0.175843	0.332	0.34	0.708137	1	-0.00548912	0.56	0.571	0.945325	1
Mrpl17	0.685835	0.747	0.423	3.25749e-09	9.68614e-05	-0.219898	0.615	0.682	0.0957249	1	-0.390878	0.611	0.713	0.0842846	1	-0.359873	0.699	0.75	0.0066835	1	-0.0679349	0.497	0.612	0.00323371	1	0.154813	0.691	0.663	0.062772	1
Trp53i11	0.876716	0.623	0.296	3.43391e-09	0.000102107	0.131048	0.41	0.544	0.00981581	1	-0.00591659	0.567	0.546	1	1	0.166631	0.673	0.635	0.1342	1	-0.609693	0.463	0.677	8.83707e-15	2.6277e-10	0.228875	0.667	0.619	0.14547	1
Slc27a3	1.39973	0.575	0.28	3.4504e-09	0.000102598	-1.3214	0.369	0.352	0.717208	1	0.118669	0.35	0.435	0.134113	1	-0.0860146	0.558	0.586	0.404673	1	0.452592	0.415	0.368	0.0812383	1	-0.29432	0.383	0.449	0.0572976	1
4632428N05Rik	0.509873	0.651	0.307	3.50388e-09	0.000104188	0.262109	0.451	0.481	0.830587	1	-0.260561	0.433	0.519	0.0928635	1	0.715903	0.613	0.493	0.0174122	1	-0.157497	0.265	0.392	0.000145498	1	0.013476	0.467	0.497	0.480475	1
Recql5	0.54841	0.267	0.037	3.52525e-09	0.000104823	0.719249	0.164	0.119	0.191202	1	9.72848e-05	0.159	0.176	0.561814	1	1.84447	0.264	0.044	7.81928e-18	2.32506e-13	0.60826	0.105	0.069	0.0294889	1	0.82302	0.189	0.109	0.00332606	1
Tll1	0.368967	0.295	0.053	3.72576e-09	0.000110785	0.311956	0.189	0.094	0.00728267	1	-0.355161	0.236	0.278	0.470875	1	0.812228	0.331	0.237	0.00348811	1	0.113086	0.231	0.203	0.173813	1	-0.477697	0.313	0.408	0.00990779	1
Ubl4a	0.476787	0.699	0.402	3.80875e-09	0.000113253	0.163901	0.492	0.594	0.16318	1	0.699444	0.631	0.435	0.00708063	1	-0.19901	0.651	0.662	0.700146	1	-0.00441341	0.381	0.493	0.0125614	1	0.437993	0.61	0.473	0.000625514	1
Dpf1	0.360078	0.212	0.016	3.89373e-09	0.00011578	-0.0206969	0.008	0.016	0.537224	1	0.0849358	0.089	0.046	0.170299	1	0.402955	0.268	0.042	1.50875e-18	4.48626e-14	-0.0168738	0.002	0.01	0.0751783	1	0.0397796	0.072	0.044	0.118105	1
Mrpl19	-0.0426983	0.712	0.354	3.90747e-09	0.000116189	0.45291	0.459	0.431	0.449358	1	1.07709	0.35	0.454	0.266897	1	-0.172839	0.647	0.358	1.90255e-13	5.65723e-09	-0.555912	0.302	0.395	0.00176534	1	-0.304508	0.354	0.507	0.000560738	1
Dnpep	0.402267	0.76	0.455	3.97529e-09	0.000118205	0.446727	0.598	0.585	0.361717	1	-0.120488	0.688	0.657	0.838238	1	0.204653	0.736	0.666	0.0867175	1	0.49787	0.557	0.495	0.0025041	1	-0.342217	0.603	0.673	0.00839602	1
Mpp1	0.195736	0.623	0.27	4.06027e-09	0.000120732	-0.00457517	0.369	0.415	0.613723	1	-0.201044	0.465	0.426	0.844828	1	0.424222	0.569	0.54	0.23414	1	0.205273	0.276	0.352	0.0301723	1	0.242579	0.495	0.497	0.569658	1
Pcdhga9	0.526951	0.76	0.413	4.13087e-09	0.000122831	-0.0455295	0.492	0.544	0.753101	1	0.0317055	0.662	0.704	0.311227	1	0.607324	0.729	0.56	2.3657e-09	7.03442e-05	0.034113	0.458	0.479	0.803247	1	0.0466521	0.598	0.677	0.0876387	1
Smtn	0.5451	0.918	0.725	4.27424e-09	0.000127094	0.16641	0.943	0.884	0.0675031	1	0.0265246	0.904	0.926	0.514499	1	0.405201	0.955	0.847	1.83687e-07	0.00546194	0.266109	0.904	0.902	0.0604683	1	-0.00980302	0.919	0.963	0.179402	1
Gja5	0.595514	0.753	0.497	4.40641e-09	0.000131024	0.506141	0.475	0.538	1	1	-0.266784	0.58	0.472	0.289154	1	0.6296	0.677	0.692	0.17916	1	0.0884922	0.24	0.407	1.44077e-08	0.000428413	1.69177	0.61	0.527	8.52704e-05	1
Mal	0.0123535	0.979	0.815	4.41626e-09	0.000131317	0.233934	0.869	0.846	0.0599586	1	0.496421	0.962	0.917	0.403139	1	0.465127	0.978	0.927	5.70082e-07	0.0169514	0.480746	0.921	0.854	1.19334e-08	0.00035484	-0.127258	0.978	0.98	0.020899	1
Pkn3	0.542167	0.705	0.46	4.76826e-09	0.000141784	-0.716122	0.459	0.588	0.0251664	1	0.0492016	0.516	0.574	0.196331	1	0.304877	0.747	0.704	0.112889	1	0.19574	0.417	0.557	0.000331177	1	0.132421	0.605	0.582	0.825714	1
Vim	0.279131	0.932	0.804	4.79985e-09	0.000142723	0.106125	0.754	0.89	0.000200017	1	0.29996	0.885	0.731	0.00973179	1	-0.214082	0.937	0.918	0.364929	1	0.218214	0.786	0.938	4.76025e-06	0.141546	0.216572	0.816	0.806	0.0342107	1
Gm11934	0.457956	0.493	0.19	4.81046e-09	0.000143039	-0.288158	0.148	0.27	0.00361907	1	-0.577384	0.331	0.685	9.07593e-10	2.69873e-05	0.160613	0.394	0.263	0.000273245	1	-0.19667	0.114	0.194	0.00020777	1	-0.16397	0.306	0.592	9.03502e-11	2.68656e-06
Stt3b	0.516069	0.712	0.344	4.83252e-09	0.000143695	0.257126	0.377	0.412	0.678104	1	0.279241	0.497	0.5	0.807657	1	0.531528	0.539	0.454	0.00248157	1	0.118265	0.233	0.277	0.200178	1	0.200806	0.433	0.429	0.950509	1
Aars	0.538187	0.637	0.296	5.31585e-09	0.000158067	-0.14554	0.402	0.579	0.00616354	1	0.27763	0.586	0.537	0.334909	1	0.368155	0.639	0.577	0.776194	1	-0.233764	0.33	0.488	3.93752e-06	0.117082	0.362767	0.608	0.52	0.0151707	1
Myo1d	0.421237	0.521	0.212	5.44098e-09	0.000161787	0.219971	0.295	0.239	0.208444	1	0.274289	0.382	0.352	0.798526	1	0.166168	0.532	0.467	0.0969794	1	0.51783	0.287	0.277	0.444402	1	-0.138415	0.325	0.35	0.430612	1
Pcdhga7	0.474433	0.76	0.413	5.7379e-09	0.000170616	-0.0661837	0.5	0.547	0.80089	1	0.0855801	0.662	0.694	0.443202	1	0.597504	0.729	0.566	4.08217e-09	0.000121383	-0.00216247	0.458	0.488	0.605692	1	-0.00337663	0.598	0.687	0.0493885	1
Pcdhga10	0.463187	0.76	0.413	5.77884e-09	0.000171834	-0.0518695	0.5	0.541	0.891964	1	0.0670157	0.656	0.694	0.391927	1	0.622001	0.729	0.562	2.55685e-09	7.60279e-05	-0.052845	0.45	0.49	0.345344	1	0.06522	0.6	0.677	0.106964	1
Ptpn1	0.403419	0.651	0.302	5.78745e-09	0.00017209	0.203149	0.426	0.494	0.326952	1	0.0753303	0.49	0.556	0.410292	1	0.0723582	0.599	0.575	0.886316	1	0.386556	0.394	0.419	0.689479	1	0.100469	0.589	0.517	0.0912477	1
Pcdhga3	0.491278	0.76	0.418	5.82054e-09	0.000173074	-0.0227657	0.508	0.55	0.818296	1	0.174863	0.662	0.685	0.592236	1	0.617179	0.729	0.56	1.4839e-09	4.41239e-05	-0.0319505	0.458	0.491	0.444409	1	-0.0129551	0.6	0.68	0.0548729	1
Pcdhga2	0.474697	0.76	0.413	6.07355e-09	0.000180597	-0.0382898	0.492	0.541	0.805194	1	0.108747	0.656	0.685	0.526087	1	0.602567	0.732	0.56	1.79716e-09	5.34385e-05	-0.0377328	0.45	0.481	0.509645	1	0.0872155	0.605	0.673	0.133683	1
Cnksr3	0.471785	0.445	0.143	6.37407e-09	0.000189533	0.431316	0.172	0.195	0.673409	1	0.711369	0.255	0.222	0.512435	1	0.622186	0.383	0.184	5.45304e-09	0.000162146	-0.571228	0.075	0.146	0.000155522	1	0.131588	0.287	0.248	0.340401	1
Dido1	0.39221	0.548	0.222	6.4197e-09	0.00019089	0.499022	0.246	0.289	0.4331	1	0.187692	0.414	0.361	0.387626	1	0.563762	0.491	0.334	0.000284272	1	-0.11955	0.225	0.321	0.000462295	1	0.156881	0.433	0.408	0.688513	1
1500017E21Rik	0.447646	0.233	0.026	6.5382e-09	0.000194413	-0.514294	0.066	0.075	0.673516	1	-0.0441942	0.127	0.167	0.413579	1	-0.000327953	0.138	0.06	0.000537333	1	0.202424	0.03	0.048	0.124986	1	-0.23607	0.041	0.099	0.0017427	1
As3mt	0.435652	0.705	0.365	6.73071e-09	0.000200138	-0.0901637	0.328	0.475	0.0121498	1	0.0273324	0.548	0.574	0.865194	1	-0.00868445	0.617	0.635	0.397059	1	-0.19397	0.293	0.438	6.52631e-06	0.19406	0.518706	0.612	0.486	0.000169016	1
Bag5	0.569268	0.863	0.54	6.76671e-09	0.000201208	0.289453	0.762	0.774	0.63974	1	0.062533	0.758	0.741	0.731788	1	0.0647502	0.836	0.759	0.0350875	1	0.143837	0.583	0.66	0.0862213	1	0.22383	0.768	0.707	0.109611	1
Pcdhgc5	0.463993	0.76	0.413	6.90011e-09	0.000205175	-0.0388535	0.492	0.544	0.780801	1	0.120905	0.656	0.685	0.532615	1	0.594787	0.729	0.56	3.06118e-09	9.10243e-05	-0.0378833	0.45	0.479	0.536094	1	0.0387989	0.593	0.677	0.0630089	1
Cog7	1.50741	0.534	0.249	6.91899e-09	0.000205736	-0.765023	0.279	0.409	0.00451837	1	1.0995	0.484	0.343	0.0170802	1	0.125062	0.55	0.496	0.317735	1	-0.484843	0.235	0.349	1.91411e-05	0.56916	0.189839	0.354	0.33	0.463599	1
Pigk	0.726506	0.712	0.434	7.2839e-09	0.000216587	0.0418706	0.598	0.616	0.904837	1	-0.399312	0.618	0.731	0.0110815	1	0.0868267	0.684	0.631	0.194283	1	-0.0810531	0.471	0.514	0.329442	1	0.0478386	0.615	0.66	0.255977	1
Pcdhgb8	0.437767	0.76	0.418	7.30073e-09	0.000217087	-0.0386384	0.492	0.541	0.80588	1	0.0816145	0.656	0.685	0.508882	1	0.5971	0.732	0.56	2.27062e-09	6.7517e-05	0.00305628	0.454	0.481	0.619758	1	0.0263137	0.593	0.677	0.0637122	1
Zyx	0.646048	0.726	0.471	7.3233e-09	0.000217758	0.344425	0.68	0.673	0.235664	1	-0.295443	0.605	0.759	0.00680375	1	-0.205028	0.781	0.788	0.422959	1	0.0941649	0.692	0.727	0.650531	1	-0.0470824	0.754	0.813	0.242112	1
Abcg2	0.106974	0.863	0.667	7.90505e-09	0.000235057	0.147705	0.672	0.667	0.201961	1	0.717624	0.841	0.759	0.0148248	1	0.549834	0.892	0.845	2.70328e-07	0.00803821	0.587767	0.775	0.679	2.70308e-09	8.03761e-05	0.165405	0.928	0.912	0.439694	1
Mxra8	0.357437	0.822	0.608	8.00343e-09	0.000237982	0.307664	0.77	0.673	0.0144944	1	-0.0970855	0.796	0.87	0.0318352	1	0.459056	0.84	0.796	0.000981979	1	0.504607	0.812	0.735	1.36883e-08	0.000407022	-0.295092	0.876	0.861	0.0055816	1
Scmh1	-0.190579	0.452	0.153	8.23243e-09	0.000244791	0.125408	0.246	0.258	0.88904	1	-0.00439386	0.306	0.352	0.456739	1	0.454626	0.364	0.301	0.0697094	1	0.277705	0.22	0.235	0.792964	1	0.29864	0.28	0.286	0.833312	1
Fkbp15	0.889796	0.582	0.243	8.59604e-09	0.000255603	0.0426619	0.303	0.377	0.161693	1	-0.630861	0.344	0.537	0.000604338	1	0.495435	0.561	0.478	0.0267537	1	0.0223267	0.356	0.373	0.881433	1	-0.104672	0.366	0.541	1.19728e-06	0.0356012
Ephb4	0.455951	0.986	0.778	9.16765e-09	0.0002726	0.500162	0.861	0.909	0.0167008	1	0.404915	0.911	0.907	0.170228	1	0.305961	0.967	0.887	0.000265433	1	0.291064	0.906	0.912	1.37098e-05	0.407662	-0.374472	0.916	0.966	2.53398e-07	0.00753478
Tab1	1.24918	0.288	0.053	9.17384e-09	0.000272784	-1.30617	0.074	0.16	0.0142905	1	-1.0045	0.134	0.231	0.0312522	1	0.767028	0.268	0.208	0.0508285	1	0.0765567	0.075	0.141	0.00057063	1	0.537517	0.208	0.129	0.0103868	1
Drosha	0.685346	0.664	0.36	9.21394e-09	0.000273976	0.601057	0.393	0.393	0.719061	1	-0.205934	0.522	0.667	0.0104774	1	0.286366	0.662	0.5	0.000201683	1	-0.232128	0.214	0.296	0.00402083	1	-0.00964385	0.426	0.595	1.17928e-05	0.350659
Pcdhgb7	0.468185	0.76	0.429	9.31963e-09	0.000277119	-0.015419	0.492	0.544	0.765901	1	0.119777	0.656	0.685	0.544688	1	0.582853	0.736	0.571	2.36017e-09	7.01796e-05	-0.0610837	0.448	0.498	0.24125	1	0.0441149	0.6	0.687	0.0576612	1
Mfsd10	0.83246	0.514	0.228	9.46902e-09	0.000281561	-0.353751	0.287	0.465	0.000893704	1	0.11393	0.363	0.333	0.728354	1	0.495509	0.491	0.449	0.181383	1	0.0732513	0.341	0.421	0.0132733	1	-0.0284391	0.395	0.384	0.559481	1
Aktip	0.369937	0.726	0.413	9.55915e-09	0.000284241	0.426179	0.459	0.456	0.920286	1	0.283044	0.516	0.528	0.745788	1	0.0111392	0.625	0.558	0.104964	1	0.0883606	0.341	0.364	0.518743	1	-0.289799	0.557	0.466	0.039549	1
Pcdhga8.1	0.46461	0.76	0.413	9.74369e-09	0.000289729	-0.0162283	0.516	0.55	0.948709	1	0.10901	0.656	0.685	0.529346	1	0.56535	0.729	0.566	8.27604e-09	0.000246088	-0.001329	0.452	0.486	0.464494	1	-0.0081998	0.596	0.673	0.0756852	1
Gm20342	-0.0169638	0.781	0.444	1.06061e-08	0.000315373	-0.483737	0.385	0.566	0.00955783	1	-0.0136664	0.427	0.324	0.13557	1	0.19874	0.717	0.405	2.06801e-17	6.14923e-13	-0.0214723	0.437	0.527	0.00107842	1	0.0322149	0.4	0.35	0.15907	1
Pygb	0.221126	0.568	0.249	1.0722e-08	0.00031882	0.411625	0.418	0.381	0.290249	1	-0.0867624	0.395	0.463	0.279741	1	0.54029	0.58	0.46	0.00865012	1	0.0754092	0.336	0.395	0.149958	1	0.128978	0.397	0.449	0.532591	1
D5Ertd579e	1.02674	0.418	0.138	1.12194e-08	0.00033361	0.177713	0.205	0.245	0.396383	1	0.0880788	0.229	0.306	0.20695	1	0.676359	0.439	0.223	1.54692e-08	0.000459976	0.00932719	0.178	0.222	0.0884989	1	-0.82057	0.225	0.33	0.00193299	1
Lrch3	1.09226	0.589	0.286	1.15933e-08	0.000344726	-0.470556	0.361	0.384	0.532259	1	-0.243873	0.433	0.463	0.551474	1	0.114632	0.602	0.538	0.0473561	1	-0.117229	0.281	0.368	0.00685999	1	-0.341176	0.428	0.483	0.0802616	1
Mavs	0.949555	0.507	0.228	1.16946e-08	0.00034774	0.131198	0.254	0.368	0.0282999	1	0.338611	0.318	0.296	0.71624	1	0.413333	0.528	0.427	0.0116581	1	-0.36393	0.24	0.294	0.0336865	1	-0.0525239	0.313	0.364	0.175308	1
Tmem80	0.626273	0.534	0.243	1.16987e-08	0.000347862	-1.52693	0.189	0.39	7.84344e-05	1	-0.487035	0.344	0.407	0.265973	1	0.425127	0.461	0.394	0.0259635	1	0.194457	0.259	0.332	0.0215256	1	0.324179	0.378	0.388	0.805528	1
Pcdhga8	0.506206	0.76	0.429	1.24027e-08	0.000368793	-0.0382805	0.5	0.541	0.919303	1	0.109142	0.656	0.685	0.529346	1	0.562352	0.732	0.566	6.32028e-09	0.000187933	-0.0373307	0.447	0.479	0.47158	1	0.0505369	0.596	0.673	0.0883642	1
Commd10	0.370569	0.582	0.254	1.25468e-08	0.000373079	-0.403584	0.352	0.525	0.00439251	1	0.204776	0.516	0.454	0.422078	1	0.280622	0.558	0.533	0.280582	1	0.454282	0.319	0.328	0.77243	1	0.354382	0.498	0.415	0.0210751	1
N4bp3	0.7192	0.685	0.354	1.27915e-08	0.000380354	-0.211647	0.443	0.579	0.0207382	1	0.818566	0.586	0.435	0.00491489	1	0.148572	0.565	0.642	0.101229	1	-0.367454	0.347	0.512	9.0516e-08	0.00269149	0.664501	0.553	0.412	4.03473e-05	1
Pcdhgb6	0.423674	0.767	0.423	1.32016e-08	0.00039255	0.0166258	0.508	0.56	0.798949	1	0.119045	0.669	0.685	0.669101	1	0.586238	0.729	0.575	9.12003e-09	0.000271184	-0.00294948	0.456	0.5	0.320451	1	0.0559789	0.612	0.677	0.136718	1
Tom1l2	0.354879	0.568	0.243	1.33567e-08	0.000397162	0.226337	0.426	0.491	0.231968	1	0.0745257	0.497	0.602	0.0692734	1	0.472295	0.576	0.515	0.0882674	1	-0.0410184	0.33	0.443	0.000991061	1	0.152901	0.572	0.548	0.241321	1
Gm26840	1.15449	0.288	0.058	1.34603e-08	0.000400242	0.18138	0.172	0.211	0.393334	1	0.377721	0.185	0.167	0.710521	1	0.314758	0.353	0.281	0.0315929	1	0.0781562	0.28	0.277	0.846065	1	0.251007	0.268	0.252	0.542462	1
Gpihbp1	0.621628	0.973	0.836	1.35906e-08	0.000404117	1.06923	0.975	0.921	3.49191e-18	1.03832e-13	-0.891582	0.943	0.991	5.80929e-13	1.72739e-08	0.0946606	0.967	0.918	0.00137428	1	0.262071	0.951	0.931	3.58385e-05	1	-0.235175	0.974	1	0.000228388	1
Hoxb2	0.34211	0.589	0.243	1.36565e-08	0.000406076	-0.00413338	0.279	0.377	0.123709	1	-0.0671826	0.433	0.37	0.495949	1	-0.305006	0.476	0.473	0.571893	1	0.191348	0.253	0.275	0.668216	1	0.0408363	0.459	0.435	0.400749	1
Znhit3	0.190238	0.616	0.265	1.39617e-08	0.00041515	0.244926	0.393	0.415	0.552746	1	0.450897	0.548	0.704	0.0543335	1	-0.196576	0.625	0.509	0.122536	1	-0.348598	0.238	0.297	0.0224523	1	0.13345	0.435	0.704	1.90021e-09	5.65029e-05
Syap1	0.327851	0.637	0.296	1.41123e-08	0.000419629	0.211218	0.418	0.418	0.928512	1	0.453112	0.427	0.463	0.882278	1	0.210901	0.535	0.52	0.253181	1	0.171554	0.293	0.314	0.734693	1	0.0605153	0.464	0.469	0.898151	1
Man2b2	0.245056	0.726	0.376	1.41525e-08	0.000420824	0.0796354	0.566	0.472	0.283189	1	-0.972738	0.573	0.731	1.62975e-05	0.484606	0.627023	0.658	0.533	0.000298237	1	0.216376	0.535	0.514	0.266515	1	0.0139301	0.589	0.568	0.752927	1
Pcdhga4	0.46685	0.76	0.423	1.41708e-08	0.000421369	0.0139941	0.508	0.553	0.953973	1	0.0826277	0.669	0.694	0.442001	1	0.596321	0.732	0.569	5.31361e-09	0.000158	-0.00626125	0.467	0.488	0.742176	1	0.081231	0.603	0.687	0.0535668	1
Atp2a3	0.519396	0.966	0.794	1.43039e-08	0.000425327	-0.120934	0.73	0.912	0.00834384	1	0.0956057	0.936	0.944	0.463392	1	0.0929956	0.851	0.805	0.0281834	1	0.65585	0.484	0.675	1.95124e-08	0.000580201	0.0521139	0.744	0.816	0.982627	1
Glod4	0.310594	0.788	0.471	1.44866e-08	0.000430759	0.233679	0.516	0.585	0.431264	1	-0.0326074	0.586	0.602	0.752079	1	0.371533	0.729	0.657	0.0043958	1	0.0742643	0.46	0.503	0.417183	1	0.174761	0.703	0.656	0.511085	1
Amigo2	1.35531	0.514	0.217	1.46537e-08	0.000435726	0.532343	0.303	0.27	0.501169	1	-0.891007	0.287	0.537	5.64187e-06	0.167761	1.2277	0.546	0.323	1.86479e-10	5.54497e-06	0.156124	0.231	0.172	0.0169227	1	-0.151327	0.328	0.398	0.027702	1
Mcam	0.57191	0.911	0.63	1.53038e-08	0.000455059	0.529198	0.852	0.824	0.00105568	1	-0.103083	0.701	0.815	0.0516273	1	0.165837	0.855	0.75	0.199866	1	0.204062	0.692	0.747	0.284274	1	-0.430757	0.593	0.633	0.240855	1
Slc12a5	0.366187	0.466	0.175	1.60042e-08	0.000475886	0.316196	0.295	0.387	0.18616	1	-0.138543	0.325	0.38	0.32137	1	0.604254	0.416	0.31	0.00351557	1	0.0442235	0.205	0.271	0.0214744	1	-0.17183	0.356	0.364	0.662724	1
Trap1	0.395274	0.692	0.365	1.62373e-08	0.000482815	-0.339992	0.385	0.566	0.00175075	1	0.39825	0.503	0.454	0.373503	1	-0.0715559	0.613	0.588	0.696946	1	-0.322751	0.306	0.5	2.80199e-09	8.33171e-05	0.457815	0.596	0.459	7.8596e-05	1
Mpv17l2	0.831312	0.548	0.243	1.65372e-08	0.000491734	-0.0224766	0.303	0.365	0.296526	1	-0.552326	0.369	0.426	0.173166	1	-0.0794842	0.42	0.414	0.960296	1	0.116298	0.231	0.289	0.0956167	1	-0.426821	0.39	0.415	0.321899	1
Dtx3	0.339135	0.493	0.185	1.65779e-08	0.000492944	-0.0460939	0.221	0.33	0.0450214	1	-0.590832	0.376	0.481	0.0376483	1	0.698291	0.558	0.511	0.0808101	1	-0.0955755	0.315	0.347	0.329815	1	-0.0675779	0.421	0.463	0.285725	1
Atp13a1	0.613612	0.616	0.323	1.66065e-08	0.000493795	0.610875	0.508	0.44	0.139566	1	-0.125002	0.554	0.491	0.743881	1	0.183438	0.554	0.549	0.597838	1	0.30279	0.432	0.454	0.808894	1	-0.0881827	0.533	0.575	0.424677	1
Fbln2	0.911982	0.685	0.466	1.67696e-08	0.000498643	-1.34325	0.361	0.572	3.1337e-06	0.0931804	-0.78542	0.484	0.593	0.261329	1	-0.103561	0.677	0.708	0.821826	1	-0.218931	0.272	0.553	1.73461e-18	5.15787e-14	-0.0982011	0.596	0.578	0.0987824	1
Tor3a	0.476108	0.849	0.571	1.71722e-08	0.000510617	0.137109	0.631	0.698	0.579013	1	0.073038	0.758	0.861	0.280117	1	-0.0642439	0.777	0.765	0.661904	1	0.120513	0.587	0.624	0.642436	1	-0.132215	0.787	0.765	0.108269	1
Amotl2	0.485333	0.836	0.571	1.72481e-08	0.000512872	0.400899	0.779	0.723	0.0149594	1	0.00358607	0.79	0.824	0.552279	1	0.300748	0.833	0.774	0.0125975	1	0.194171	0.662	0.698	0.926328	1	0.204298	0.797	0.779	0.437765	1
RP24-407P8.1	-0.653442	0.527	0.704	1.73013e-08	0.000514454	-0.157512	0.377	0.418	0.281666	1	0.371609	0.624	0.481	0.00116681	1	-0.0643779	0.323	0.374	0.23316	1	0.122176	0.313	0.268	0.0465176	1	0.267606	0.426	0.313	0.000177997	1
Pcdhga11	0.488469	0.76	0.434	1.73612e-08	0.000516235	-0.0472926	0.492	0.547	0.744589	1	0.119677	0.662	0.685	0.597989	1	0.571326	0.729	0.562	4.97589e-09	0.000147958	-0.0575953	0.448	0.488	0.352863	1	0.0521917	0.593	0.677	0.0699848	1
Atp5l	0.641265	0.863	0.587	1.7535e-08	0.000521403	-0.136862	0.713	0.789	0.0978911	1	-1.07895	0.713	0.88	3.75621e-13	1.11691e-08	-0.0267673	0.743	0.735	0.729867	1	-0.272315	0.617	0.704	0.000281811	1	-0.484986	0.701	0.82	2.62657e-09	7.81011e-05
Yipf1	0.16503	0.63	0.328	1.84457e-08	0.000548483	0.278921	0.426	0.421	0.772309	1	-0.324329	0.414	0.602	0.0162518	1	-0.541195	0.569	0.619	0.0301415	1	0.264133	0.341	0.361	0.936057	1	-0.282916	0.464	0.588	0.00295033	1
Dhx16	0.211578	0.61	0.28	1.85594e-08	0.000551865	0.476932	0.369	0.415	0.775852	1	-0.210535	0.452	0.37	0.307836	1	0.147476	0.546	0.527	0.454114	1	0.207241	0.306	0.33	0.614617	1	0.444445	0.447	0.384	0.0511439	1
Il4ra	0.440032	0.678	0.344	1.8726e-08	0.000556817	0.570021	0.639	0.503	0.0043806	1	-0.23348	0.471	0.685	0.000354372	1	0.759282	0.602	0.469	0.000920491	1	0.106773	0.409	0.438	0.612374	1	0.408336	0.526	0.507	0.341281	1
Dnajc12	1.48855	0.212	0.021	1.92136e-08	0.000571316	-0.0790069	0.172	0.107	0.0723963	1	-0.0579051	0.121	0.13	0.834436	1	0.1021	0.071	0.137	0.0055146	1	0.490082	0.075	0.057	0.203422	1	-0.154237	0.12	0.136	0.535561	1
Stau1	0.199119	0.767	0.439	1.97281e-08	0.000586616	-0.24219	0.549	0.591	0.272928	1	0.190038	0.65	0.611	0.64493	1	-0.0259375	0.699	0.662	0.917898	1	0.134389	0.473	0.512	0.440808	1	0.438318	0.706	0.622	0.0213998	1
Zfp438	0.834541	0.26	0.042	1.97554e-08	0.000587427	-0.448616	0.041	0.11	0.02518	1	0.550739	0.102	0.12	0.671282	1	0.708203	0.219	0.126	0.0011907	1	-0.887013	0.056	0.095	0.0160051	1	0.531431	0.098	0.15	0.0374945	1
Zfp623	0.913733	0.432	0.148	1.98497e-08	0.00059023	0.745246	0.18	0.208	0.68488	1	1.54697	0.293	0.148	0.00356781	1	0.731069	0.394	0.31	0.00503487	1	-0.222693	0.188	0.216	0.246574	1	0.360986	0.318	0.207	0.00098923	1
Rpl37a	0.455955	0.993	0.91	1.99394e-08	0.000592899	-0.341334	0.967	0.984	4.42631e-05	1	-0.743786	0.962	0.972	8.3502e-16	2.48293e-11	-0.0170673	0.985	0.936	0.275145	1	-0.374468	0.917	0.971	4.06122e-12	1.2076e-07	-0.544043	0.947	0.993	8.59021e-28	2.5543e-23
Zfp260	0.359006	1	0.91	2.0013e-08	0.000595088	-0.472862	0.844	0.962	0.00917517	1	0.402484	0.924	0.935	0.482474	1	0.159329	0.996	0.929	1.9767e-06	0.0587771	-0.00864631	0.837	0.895	0.0731725	1	0.237635	0.921	0.922	0.726766	1
Btbd3	0.452414	0.596	0.275	2.0204e-08	0.000600766	0.00319799	0.344	0.258	0.100847	1	-0.23974	0.306	0.5	0.00452826	1	0.537147	0.528	0.372	0.000130746	1	0.0786953	0.24	0.275	0.18358	1	-0.122605	0.349	0.432	0.02941	1
Plaa	0.19202	0.514	0.217	2.04746e-08	0.000608811	0.118362	0.262	0.365	0.0746747	1	0.778844	0.459	0.343	0.0591962	1	0.404451	0.55	0.449	0.00499766	1	0.0603651	0.223	0.284	0.0317615	1	0.0715168	0.493	0.401	0.026821	1
Gcnt2	0.429061	0.589	0.275	2.05032e-08	0.000609663	0.223838	0.32	0.258	0.243966	1	0.92282	0.433	0.37	0.152053	1	0.38698	0.61	0.542	0.00985242	1	0.314254	0.358	0.333	0.341251	1	0.330594	0.522	0.422	0.00515263	1
Pcdhga6	0.484582	0.76	0.439	2.05485e-08	0.00061101	-0.0528044	0.492	0.55	0.709647	1	0.0692531	0.656	0.685	0.491976	1	0.435701	0.729	0.58	1.65382e-08	0.000491763	-0.025049	0.462	0.491	0.571654	1	0.0616815	0.603	0.673	0.120434	1
Pias3	0.159268	0.527	0.212	2.0881e-08	0.000620896	0.170632	0.459	0.393	0.281429	1	0.0686317	0.471	0.491	0.60728	1	0.406422	0.55	0.436	0.00513984	1	0.388623	0.396	0.393	0.504737	1	-0.269843	0.428	0.51	0.0107742	1
Dhx38	0.483583	0.5	0.196	2.19615e-08	0.000653026	-0.223964	0.262	0.283	0.509442	1	0.351862	0.363	0.333	0.70548	1	0.0312415	0.424	0.285	0.000173468	1	0.0188978	0.221	0.273	0.0451852	1	0.0815636	0.356	0.296	0.109344	1
Gm15441	0.44862	1	0.857	2.25286e-08	0.000669888	0.290682	0.992	1	1.13078e-05	0.336238	0.0826279	0.987	0.954	0.662597	1	0.146203	0.996	0.945	0.00245192	1	0.148506	0.991	0.986	0.000246928	1	0.107562	0.981	0.98	0.0550773	1
Zfp46	0.735888	0.438	0.159	2.31535e-08	0.000688468	-0.520451	0.172	0.248	0.0899321	1	0.230038	0.331	0.333	0.802465	1	0.113562	0.387	0.378	0.867246	1	0.146361	0.154	0.184	0.273902	1	0.158149	0.285	0.364	0.021283	1
Slc39a9	0.623923	0.568	0.243	2.40317e-08	0.000714582	0.761029	0.328	0.308	0.460747	1	-0.30293	0.325	0.574	6.69896e-05	1	0.291616	0.572	0.489	0.0637594	1	0.160818	0.298	0.304	0.983989	1	-0.124998	0.428	0.493	0.0813345	1
Dck	0.337003	0.411	0.138	2.4237e-08	0.000720688	0.235465	0.131	0.17	0.332	1	-0.532167	0.21	0.204	0.960538	1	0.21233	0.416	0.363	0.0930014	1	-0.481119	0.094	0.158	0.001273	1	0.646852	0.218	0.184	0.206895	1
Arrdc3	0.920794	0.418	0.138	2.44859e-08	0.00072809	0.289338	0.107	0.186	0.0403406	1	-1.58614	0.21	0.343	0.0107742	1	0.650974	0.342	0.252	0.00977041	1	-0.971663	0.066	0.139	6.91837e-05	1	-0.900645	0.218	0.259	0.226216	1
Vps11	0.730055	0.616	0.312	2.52662e-08	0.000751291	0.0725011	0.426	0.497	0.264124	1	0.0426695	0.529	0.417	0.287385	1	-0.0424455	0.554	0.496	0.212976	1	0.175063	0.385	0.412	0.709668	1	-0.0911789	0.514	0.493	0.488518	1
Gm20412	0.672273	0.644	0.344	2.68819e-08	0.000799334	0.595048	0.598	0.462	0.00120986	1	0.383953	0.637	0.583	0.464976	1	0.37417	0.762	0.701	0.000736632	1	0.373752	0.668	0.589	8.95881e-06	0.26639	-0.00279397	0.722	0.796	0.0294131	1
Cat	0.252231	0.822	0.524	2.82991e-08	0.000841474	0.187296	0.59	0.657	0.845245	1	0.301991	0.688	0.63	0.238061	1	0.108892	0.781	0.699	0.0939621	1	0.104653	0.523	0.589	0.288815	1	0.111693	0.66	0.687	0.150291	1
RP24-503L4.4	0.376795	0.774	0.439	2.84623e-08	0.000846327	-0.151528	0.459	0.632	0.0212608	1	-0.0344511	0.529	0.611	0.357	1	0.433053	0.859	0.418	5.45993e-26	1.62351e-21	-0.0870842	0.417	0.515	0.0225607	1	-0.211858	0.452	0.687	5.08461e-07	0.0151191
Tnfrsf26	0.642856	0.685	0.413	2.89685e-08	0.000861379	-0.0463672	0.385	0.406	0.915634	1	0.00257606	0.516	0.519	0.715482	1	0.0850501	0.662	0.604	0.0105919	1	0.104831	0.306	0.34	0.376182	1	0.218126	0.61	0.585	0.276704	1
Cd93	0.393794	0.795	0.593	2.98783e-08	0.000888431	0.160151	0.525	0.557	0.902392	1	-0.498065	0.624	0.787	0.00124995	1	0.131769	0.896	0.841	0.0146305	1	0.0430134	0.653	0.708	0.203537	1	-0.459441	0.809	0.922	4.70476e-10	1.39896e-05
Map3k4	1.65836	0.363	0.106	2.99842e-08	0.00089158	0.166393	0.221	0.23	0.942687	1	0.272875	0.261	0.194	0.256167	1	0.502026	0.335	0.23	0.00181331	1	0.319287	0.154	0.168	0.552553	1	0.23255	0.187	0.197	0.69351	1
Chp1	0.193122	0.781	0.455	3.00648e-08	0.000893977	-0.285922	0.508	0.642	0.030614	1	0.198007	0.662	0.528	0.0415659	1	-0.0156887	0.684	0.686	0.826509	1	-0.11275	0.42	0.538	0.00155429	1	0.291998	0.694	0.582	0.0107893	1
Ythdf3	0.679053	0.616	0.307	3.01225e-08	0.000895692	-0.00915319	0.369	0.362	0.945751	1	0.211053	0.439	0.426	0.933193	1	-0.109245	0.569	0.478	0.0740607	1	-0.0570662	0.178	0.27	0.0009058	1	0.244782	0.409	0.398	0.855842	1
Serinc3	0.377565	1	0.995	3.10697e-08	0.000923857	0.959128	1	0.991	2.48266e-27	7.38219e-23	-0.815427	1	1	8.06553e-20	2.39829e-15	0.403998	0.996	0.982	3.94041e-15	1.17168e-10	0.889005	0.992	0.947	5.46909e-56	1.62623e-51	-0.677785	0.995	0.997	1.79088e-37	5.32519e-33
Lix1	1.37836	0.308	0.074	3.1139e-08	0.000925917	-0.725352	0.082	0.138	0.125923	1	-0.747073	0.14	0.269	0.00815097	1	-0.664127	0.249	0.201	0.202584	1	-0.115596	0.092	0.093	0.964967	1	-0.0332549	0.182	0.395	5.67113e-09	0.000168631
Zfp512	1.6142	0.5	0.222	3.21014e-08	0.000954536	-0.595101	0.148	0.318	0.000275894	1	0.142252	0.414	0.407	0.997812	1	0.0336759	0.546	0.46	0.0431449	1	0.0775889	0.244	0.313	0.0138356	1	0.432909	0.39	0.357	0.263995	1
Sdf4	0.392462	0.966	0.81	3.34861e-08	0.000995709	0.0553972	0.877	0.896	0.75587	1	-0.175027	0.898	0.935	0.271801	1	0.0849235	0.933	0.894	0.0956284	1	0.0709642	0.859	0.895	0.761603	1	0.000810737	0.921	0.929	0.999114	1
Gas7	0.638592	0.87	0.762	3.35951e-08	0.00099895	-0.136536	0.77	0.821	0.483044	1	-0.103849	0.777	0.861	0.0927977	1	-0.285746	0.896	0.841	0.00563495	1	-0.1469	0.749	0.811	0.0178804	1	-0.265831	0.801	0.891	0.000636103	1
Tmem198b	0.0767043	0.527	0.206	3.39982e-08	0.00101094	-0.162776	0.287	0.371	0.052316	1	0.0255833	0.325	0.426	0.0528922	1	0.666353	0.483	0.429	0.192183	1	-0.316791	0.28	0.325	0.128746	1	-0.0340811	0.385	0.422	0.32374	1
Hist1h1c	0.495802	0.856	0.593	3.54766e-08	0.0010549	-0.0477514	0.648	0.648	0.778456	1	-0.465899	0.726	0.778	0.0362395	1	0.524843	0.903	0.765	9.35872e-08	0.00278282	0.454272	0.619	0.649	0.290339	1	-0.530007	0.761	0.901	2.4467e-09	7.27527e-05
Aff1	1.03104	0.404	0.132	3.59033e-08	0.00106758	0.213676	0.221	0.214	0.767998	1	0.389202	0.331	0.269	0.372434	1	0.206258	0.357	0.361	0.937178	1	0.0617516	0.193	0.198	0.928112	1	-0.13371	0.313	0.313	0.885656	1
Azin1	0.26244	0.829	0.582	3.61817e-08	0.00107586	-0.39598	0.533	0.585	0.162971	1	0.574599	0.599	0.685	0.581538	1	0.430383	0.781	0.728	0.00010731	1	0.363479	0.413	0.405	0.566236	1	-0.444816	0.603	0.711	0.0093695	1
Fam101b	0.0904991	0.76	0.556	3.65969e-08	0.00108821	-0.330987	0.549	0.717	5.81779e-05	1	0.227309	0.764	0.741	0.300924	1	-0.103366	0.877	0.874	0.683669	1	-0.873211	0.538	0.854	4.74537e-37	1.41104e-32	0.0419744	0.818	0.898	0.852816	1
Dnajc4	0.522209	0.267	0.048	3.6781e-08	0.00109368	-0.113572	0.123	0.164	0.285941	1	0.340327	0.306	0.259	0.252086	1	-0.167799	0.219	0.294	0.025655	1	0.377777	0.148	0.131	0.355889	1	-0.127373	0.275	0.272	0.79902	1
Lypla2	0.271326	0.726	0.407	3.68754e-08	0.00109649	0.107928	0.566	0.623	0.825254	1	-0.341554	0.554	0.537	0.504743	1	0.0329244	0.703	0.677	0.724216	1	0.108184	0.51	0.552	0.429943	1	0.0536048	0.545	0.537	0.567612	1
Fam45a	0.0899429	0.568	0.28	3.7303e-08	0.0011092	-0.496258	0.197	0.431	1.56684e-05	0.465899	-0.203819	0.433	0.454	0.434922	1	0.159808	0.539	0.458	0.128433	1	-0.449622	0.191	0.337	1.05205e-07	0.00312828	0.41951	0.514	0.463	0.106587	1
Bcl7a	0.862452	0.342	0.09	3.75347e-08	0.00111609	1.02995	0.238	0.135	0.00853634	1	-0.188054	0.185	0.213	0.492858	1	0.717329	0.271	0.223	0.143527	1	-0.030755	0.101	0.112	0.663355	1	0.208171	0.189	0.156	0.259441	1
Myo1b	-0.239541	0.425	0.153	3.8446e-08	0.00114319	0.186931	0.205	0.236	0.615592	1	-0.692825	0.287	0.306	0.690648	1	0.885877	0.494	0.35	6.48261e-06	0.19276	0.2006	0.266	0.284	0.672153	1	-0.369894	0.342	0.401	0.100893	1
Lzts2	0.512911	0.5	0.206	3.8811e-08	0.00115405	0.158217	0.451	0.349	0.11303	1	-0.0998266	0.439	0.519	0.183157	1	0.480202	0.487	0.473	0.405669	1	-0.0388256	0.343	0.378	0.112916	1	-0.0949433	0.438	0.408	0.456227	1
Vwa1	1.87004	0.562	0.291	3.88317e-08	0.00115466	0.114439	0.467	0.456	0.887484	1	0.0653048	0.376	0.352	0.688037	1	0.34752	0.595	0.551	0.108281	1	0.0773248	0.497	0.522	0.536954	1	0.232672	0.486	0.452	0.356039	1
Ptpru	-0.066299	0.781	0.497	3.88535e-08	0.00115531	-0.102647	0.738	0.651	0.124916	1	0.394568	0.764	0.843	0.680958	1	0.309832	0.929	0.823	2.78784e-05	0.828965	0.0510261	0.797	0.797	0.62022	1	-0.26365	0.871	0.895	0.000371961	1
Mn1	0.50961	0.692	0.376	3.90387e-08	0.00116082	-0.367367	0.311	0.324	0.868709	1	-0.112743	0.484	0.648	0.0257801	1	-0.489169	0.576	0.553	0.363315	1	-0.39893	0.137	0.186	0.0352558	1	0.059389	0.478	0.483	0.708858	1
Suv420h2	2.74253	0.226	0.032	3.90833e-08	0.00116214	0.484959	0.18	0.186	0.829785	1	-0.646879	0.159	0.241	0.072898	1	-0.0303008	0.208	0.228	0.552396	1	-0.960045	0.079	0.167	8.66462e-06	0.257643	-0.25975	0.182	0.245	0.0460237	1
Map3k1	0.064363	0.664	0.323	3.91173e-08	0.00116315	-0.694352	0.344	0.384	0.295758	1	-0.128087	0.471	0.472	0.585159	1	-0.0641239	0.68	0.465	5.43805e-06	0.1617	-0.595292	0.242	0.332	0.000153071	1	-0.236085	0.455	0.544	0.0584514	1
Pcdhga1	0.4031	0.767	0.434	3.96046e-08	0.00117764	-0.0540677	0.492	0.547	0.727927	1	0.049865	0.656	0.694	0.4268	1	0.480955	0.736	0.602	2.14045e-07	0.00636464	-0.0198847	0.454	0.488	0.520153	1	0.0534251	0.6	0.673	0.126612	1
Capn5	0.633357	0.644	0.307	4.05868e-08	0.00120685	0.579861	0.475	0.365	0.00689599	1	-0.0029586	0.395	0.463	0.279741	1	0.748563	0.513	0.334	5.20225e-07	0.0154689	0.138298	0.214	0.229	0.656902	1	-0.0241776	0.318	0.371	0.110878	1
Bri3	0.907058	0.432	0.153	4.15804e-08	0.00123639	-0.0834064	0.311	0.437	0.04246	1	-0.237921	0.306	0.491	0.0108623	1	-0.224105	0.39	0.438	0.309487	1	-0.725502	0.205	0.395	1.85476e-12	5.51512e-08	-0.827501	0.323	0.469	6.21121e-05	1
Acy3	0.661544	0.459	0.175	4.16389e-08	0.00123813	-0.288479	0.262	0.286	0.516786	1	0.237059	0.261	0.361	0.121317	1	-0.00737637	0.379	0.396	0.400477	1	0.324121	0.265	0.208	0.0165889	1	-0.197761	0.292	0.296	0.827961	1
Hsbp1	0.273301	0.904	0.614	4.17195e-08	0.00124053	-0.106254	0.762	0.808	0.534226	1	-0.213514	0.771	0.815	0.564571	1	-0.143061	0.877	0.81	0.603785	1	-0.0341304	0.638	0.768	0.0045802	1	-0.240087	0.754	0.847	0.0095994	1
Xdh	0.405542	0.849	0.608	4.1814e-08	0.00124334	1.16726	0.861	0.575	4.08364e-14	1.21427e-09	-0.00120502	0.892	0.935	0.0953889	1	0.407155	0.903	0.861	3.0595e-06	0.0909743	0.765186	0.857	0.662	3.08343e-21	9.16858e-17	-0.326039	0.931	0.956	7.01568e-07	0.0208611
Cul1	0.562751	0.774	0.481	4.22967e-08	0.00125769	-0.0391876	0.475	0.572	0.164628	1	0.547223	0.707	0.574	0.0351078	1	0.256439	0.684	0.664	0.0313018	1	0.107335	0.415	0.471	0.106269	1	0.171919	0.627	0.558	0.142376	1
Ankrd16	0.0440128	0.397	0.132	4.25282e-08	0.00126458	-0.650178	0.123	0.204	0.0419973	1	-0.41495	0.197	0.306	0.0496486	1	0.691975	0.394	0.314	0.033351	1	0.278708	0.173	0.192	0.453841	1	0.233045	0.237	0.316	0.0197363	1
Nckipsd	-0.136809	0.575	0.254	4.27867e-08	0.00127226	0.144	0.582	0.368	0.000111503	1	0.135146	0.516	0.509	0.547904	1	0.902455	0.677	0.54	1.94698e-08	0.000578934	0.842027	0.523	0.333	1.53512e-12	4.56469e-08	0.0886346	0.634	0.639	0.335036	1
Yeats2	1.80841	0.281	0.058	4.29787e-08	0.00127797	-0.61422	0.098	0.113	0.664228	1	0.0422788	0.178	0.222	0.34249	1	0.858102	0.283	0.159	7.95788e-05	1	-0.793252	0.068	0.115	0.00607842	1	0.369233	0.151	0.173	0.41107	1
Nipsnap1	1.01386	0.425	0.153	4.31347e-08	0.00128261	0.494841	0.213	0.151	0.117566	1	-0.536041	0.191	0.213	0.635505	1	0.369016	0.375	0.372	0.76447	1	0.117977	0.154	0.141	0.473194	1	0.370773	0.347	0.218	0.000311952	1
Chmp1a	0.403646	0.774	0.444	4.32442e-08	0.00128587	-0.0471853	0.615	0.667	0.274719	1	0.405227	0.675	0.583	0.0677341	1	0.481257	0.751	0.65	0.00372761	1	0.030437	0.591	0.651	0.238191	1	0.152957	0.72	0.636	0.131839	1
Pcdhgb5	0.473303	0.767	0.45	4.36786e-08	0.00129878	-0.0560149	0.508	0.55	0.86242	1	0.0989229	0.656	0.694	0.464431	1	0.448735	0.732	0.575	4.88763e-08	0.00145334	0.00242669	0.458	0.49	0.550199	1	0.0316311	0.596	0.68	0.0724194	1
Pbld2	0.192974	0.295	0.069	4.41902e-08	0.00131399	-0.0299847	0.123	0.192	0.10122	1	-0.28446	0.159	0.306	0.00621887	1	0.633532	0.242	0.186	0.104437	1	0.00141486	0.077	0.141	0.00103651	1	0.518462	0.148	0.303	1.87576e-06	0.0557757
Pcdhgb4	0.50603	0.76	0.434	4.42257e-08	0.00131505	-0.0750556	0.516	0.55	0.929081	1	0.0572505	0.669	0.694	0.419684	1	0.571983	0.747	0.571	1.51703e-09	4.51089e-05	-0.0380352	0.46	0.495	0.451734	1	0.0129737	0.608	0.694	0.0865772	1
Magix	0.0501164	0.384	0.116	4.5161e-08	0.00134286	0.26619	0.172	0.311	0.0118194	1	0.0993965	0.312	0.241	0.279811	1	-0.459492	0.342	0.456	0.000511622	1	-0.556045	0.15	0.241	0.000200082	1	0.778119	0.354	0.228	0.000103947	1
Slc36a4	0.440559	0.507	0.19	4.59423e-08	0.00136609	0.177893	0.213	0.308	0.0860239	1	-0.571507	0.331	0.5	0.00620897	1	0.696164	0.461	0.381	0.0148996	1	-0.222277	0.167	0.246	0.00207234	1	-0.15957	0.385	0.459	0.033028	1
Cdc7	-1.08471	0.39	0.132	4.62261e-08	0.00137453	-0.295527	0.238	0.258	0.632576	1	-0.205787	0.248	0.546	2.76112e-06	0.0821018	-0.117913	0.457	0.345	0.0101398	1	-0.700604	0.158	0.237	0.000567515	1	-0.657985	0.273	0.605	2.01463e-16	5.9905e-12
Sdhaf2	0.263532	0.616	0.302	4.69776e-08	0.00139688	-0.432949	0.344	0.418	0.113315	1	-0.36836	0.465	0.509	0.322135	1	-0.153326	0.621	0.595	0.579555	1	0.194293	0.308	0.34	0.537572	1	0.146104	0.526	0.5	0.473479	1
Lig1	0.0662636	0.247	0.042	4.74037e-08	0.00140955	-0.225069	0.098	0.151	0.155583	1	0.0932828	0.172	0.204	0.508444	1	0.400632	0.227	0.175	0.118104	1	-0.568718	0.099	0.146	0.018303	1	0.183965	0.203	0.19	0.854632	1
Palm	0.00853417	0.733	0.497	4.79941e-08	0.0014271	-0.414759	0.664	0.689	0.948413	1	0.439213	0.701	0.685	0.766421	1	0.119368	0.881	0.821	0.298511	1	0.292754	0.829	0.763	0.000571754	1	0.16188	0.813	0.82	0.500806	1
2410002F23Rik	1.0151	0.452	0.169	4.86311e-08	0.00144605	0.297619	0.246	0.33	0.0935001	1	-0.236493	0.357	0.389	0.673734	1	0.355847	0.48	0.394	0.0213007	1	-0.0177723	0.227	0.292	0.0340295	1	0.113013	0.361	0.313	0.193031	1
Eif4e	0.593704	0.795	0.519	4.88406e-08	0.00145228	-0.126269	0.59	0.667	0.158582	1	-0.00515862	0.726	0.806	0.347399	1	-0.177505	0.844	0.71	0.152445	1	0.0967736	0.555	0.543	0.367734	1	0.208015	0.663	0.759	0.933643	1
Entpd1	0.429075	0.952	0.836	4.91045e-08	0.00146012	0.53131	0.934	0.881	0.000747456	1	-0.00151645	0.924	0.981	0.0771517	1	0.325741	0.974	0.934	1.86288e-07	0.00553928	0.464424	0.927	0.888	1.35897e-10	4.0409e-06	-0.124735	0.988	0.99	0.00462363	1
Epc1	0.435025	0.432	0.148	5.05993e-08	0.00150457	-0.140453	0.205	0.299	0.0518749	1	0.120308	0.369	0.389	0.763739	1	0.451618	0.368	0.29	0.06803	1	-0.455599	0.163	0.337	2.1279e-10	6.3273e-06	0.195321	0.28	0.252	0.56697	1
Zfp282	1.03114	0.301	0.069	5.1594e-08	0.00153415	-0.798253	0.148	0.135	0.718578	1	-0.285984	0.089	0.185	0.0191522	1	2.06436	0.275	0.106	7.88506e-09	0.000234462	-0.221164	0.131	0.146	0.482838	1	-0.418241	0.148	0.207	0.0242833	1
Fstl1	0.391704	0.918	0.757	5.25391e-08	0.00156225	0.496523	0.828	0.802	0.0803077	1	-0.166256	0.904	0.963	0.0095552	1	0.253498	0.944	0.909	0.00113662	1	0.108851	0.728	0.787	0.491076	1	-0.0268889	0.945	0.959	0.0226545	1
Rps15a	0.483679	0.918	0.64	5.38193e-08	0.00160032	-0.284985	0.738	0.852	0.00757323	1	-0.684121	0.796	0.88	8.85161e-06	0.263203	-0.0296014	0.87	0.75	0.0733631	1	-0.46999	0.713	0.828	3.42378e-12	1.01806e-07	-0.620512	0.758	0.884	6.13463e-13	1.82413e-08
Gm11946	0.644512	0.747	0.466	5.52851e-08	0.0016439	0.168907	0.582	0.597	0.830057	1	-0.0770803	0.624	0.694	0.293807	1	0.395094	0.814	0.662	2.1135e-07	0.0062845	0.225218	0.73	0.694	0.070632	1	-0.0327956	0.732	0.776	0.30003	1
Naa60	0.177645	0.801	0.466	5.80021e-08	0.00172469	0.101141	0.656	0.698	0.325609	1	0.0834648	0.682	0.685	0.427645	1	0.223148	0.743	0.721	0.706464	1	-0.0169376	0.565	0.655	0.0134959	1	0.0136381	0.665	0.667	0.645266	1
Narfl	0.268052	0.507	0.222	5.81693e-08	0.00172966	-0.315447	0.32	0.377	0.274748	1	-0.46003	0.42	0.426	0.390088	1	0.086979	0.487	0.458	0.732464	1	0.10198	0.308	0.321	0.853649	1	-0.193855	0.323	0.418	0.00903185	1
Mfap3	0.146467	0.644	0.333	5.83004e-08	0.00173356	-0.111158	0.311	0.44	0.0368746	1	-0.278701	0.503	0.611	0.0302152	1	0.267849	0.68	0.573	0.100793	1	-0.190009	0.257	0.342	0.00256267	1	0.0561328	0.507	0.483	0.429282	1
Fam175b	0.993814	0.445	0.164	5.84255e-08	0.00173728	-0.241881	0.205	0.182	0.705037	1	-0.29595	0.325	0.296	0.945435	1	0.172597	0.368	0.272	0.00713765	1	0.0150352	0.188	0.174	0.637143	1	0.0702454	0.282	0.293	0.959131	1
Pcca	0.196587	0.342	0.095	5.90705e-08	0.00175646	-1.19634	0.139	0.211	0.0921888	1	0.173644	0.274	0.157	0.0262561	1	-0.0474821	0.312	0.204	0.00420992	1	-0.47173	0.146	0.204	0.0113198	1	0.41662	0.263	0.184	0.0197681	1
Slc7a7	0.593614	0.329	0.085	5.9475e-08	0.00176849	-1.75406	0.131	0.176	0.223895	1	1.35057	0.166	0.222	0.309273	1	0.254013	0.32	0.296	0.559555	1	0.123026	0.101	0.155	0.0131684	1	-0.267914	0.108	0.177	0.0138755	1
Rpl38	0.711694	0.918	0.683	5.95793e-08	0.00177159	-0.37603	0.77	0.877	0.000401358	1	-0.843534	0.726	0.843	4.71312e-08	0.00140145	0.190083	0.885	0.79	0.0809292	1	-0.423169	0.752	0.866	3.44655e-13	1.02483e-08	-0.46474	0.792	0.857	2.9312e-10	8.71593e-06
Pcdhga12	0.454469	0.808	0.529	6.00171e-08	0.00178461	-0.0584523	0.549	0.604	0.834593	1	0.157725	0.726	0.861	0.0866146	1	0.618796	0.762	0.617	4.43531e-09	0.000131884	-0.0620122	0.488	0.555	0.117823	1	0.0376625	0.691	0.813	0.000268606	1
Gm17690	0.880388	0.459	0.185	6.0675e-08	0.00180417	-0.524681	0.197	0.305	0.0186151	1	-0.133656	0.344	0.389	0.448938	1	0.092542	0.413	0.352	0.0816687	1	0.0762376	0.208	0.237	0.335461	1	0.407358	0.361	0.259	0.00719205	1
Synj2	0.213793	0.247	0.042	6.08769e-08	0.00181018	-0.067712	0.082	0.091	0.759123	1	-1.07552	0.102	0.139	0.326109	1	0.903396	0.193	0.126	0.0129324	1	0.104945	0.047	0.072	0.0729147	1	0.166937	0.091	0.078	0.525143	1
Vipas39	0.75021	0.521	0.238	6.13463e-08	0.00182413	0.178531	0.311	0.346	0.680601	1	-0.44826	0.414	0.352	0.451447	1	0.163417	0.539	0.529	0.917802	1	0.292525	0.31	0.309	0.685468	1	-0.471558	0.402	0.398	0.591148	1
Dars	0.257632	0.692	0.381	6.27797e-08	0.00186675	-0.666315	0.328	0.55	7.47976e-05	1	-0.0747353	0.554	0.602	0.209774	1	0.23332	0.647	0.553	0.0118367	1	0.103423	0.385	0.481	0.00877503	1	0.664398	0.629	0.476	1.56769e-05	0.466152
Chtop	0.268212	0.89	0.63	6.28107e-08	0.00186768	0.0722213	0.672	0.739	0.317489	1	-0.132509	0.732	0.796	0.226958	1	-0.00947051	0.844	0.781	0.0200805	1	-0.153653	0.563	0.632	0.0563661	1	-0.0689907	0.742	0.762	0.543075	1
Eogt	0.419074	0.911	0.772	6.47513e-08	0.00192538	0.118431	0.787	0.858	0.290878	1	0.161244	0.879	0.898	0.799001	1	0.249329	0.911	0.909	0.0265141	1	-0.150576	0.809	0.861	0.0417118	1	0.316309	0.878	0.854	0.0399725	1
Sh3tc2	0.533241	0.589	0.302	6.47887e-08	0.00192649	0.962559	0.369	0.381	0.542727	1	0.654693	0.433	0.426	0.544394	1	0.0547437	0.572	0.606	0.480509	1	-0.140834	0.362	0.428	0.0379719	1	0.203216	0.567	0.463	0.0312382	1
Unc93b1	0.522304	0.712	0.418	6.48693e-08	0.00192889	-0.479301	0.475	0.575	0.0340025	1	0.0838559	0.605	0.611	0.668457	1	0.354692	0.617	0.591	0.108534	1	0.434975	0.531	0.522	0.254317	1	0.14858	0.651	0.636	0.764686	1
Slc25a24	0.454537	0.568	0.254	6.49373e-08	0.00193091	-1.52819	0.148	0.314	0.000295956	1	0.630933	0.401	0.444	0.730263	1	0.0951986	0.524	0.423	0.00546963	1	-0.212968	0.165	0.261	0.000142609	1	-0.0823525	0.443	0.418	0.737434	1
Cep83os	0.964587	0.212	0.026	6.67469e-08	0.00198472	0.167044	0.074	0.107	0.301615	1	-0.566635	0.076	0.167	0.0209826	1	1.17273	0.23	0.153	0.00700216	1	-0.268219	0.086	0.11	0.157491	1	-0.421035	0.122	0.15	0.306648	1
Akt2	1.01578	0.295	0.069	6.67499e-08	0.00198481	0.590913	0.164	0.214	0.340848	1	-0.108524	0.197	0.287	0.0932466	1	0.803633	0.275	0.179	0.00217019	1	-0.415301	0.152	0.201	0.0339739	1	0.0435739	0.227	0.204	0.433941	1
Hltf	0.313974	0.445	0.169	6.84868e-08	0.00203645	0.762253	0.197	0.217	0.865373	1	0.716435	0.255	0.204	0.311354	1	0.123114	0.401	0.341	0.176983	1	-0.142006	0.156	0.182	0.282295	1	0.327763	0.268	0.255	0.642638	1
Zdhhc4	0.158208	0.603	0.28	6.86997e-08	0.00204279	-0.159327	0.377	0.365	0.860468	1	-0.287731	0.408	0.611	0.000738157	1	0.178554	0.558	0.491	0.134389	1	0.00313795	0.298	0.371	0.0377643	1	-0.274612	0.478	0.514	0.347879	1
Arfgap3	0.275652	0.5	0.201	6.88107e-08	0.00204609	-0.0742436	0.303	0.393	0.131575	1	0.21048	0.35	0.38	0.797319	1	0.884907	0.487	0.334	1.07485e-05	0.319605	0.43093	0.298	0.304	0.885837	1	0.201084	0.344	0.323	0.567908	1
Xndc1	0.840364	0.212	0.026	6.91499e-08	0.00205617	0.260927	0.057	0.041	0.471931	1	0.860483	0.178	0.13	0.326362	1	0.494076	0.238	0.102	1.25517e-06	0.0373224	-0.312271	0.045	0.07	0.0684457	1	0.170108	0.12	0.156	0.171887	1
Rnf170	1.34612	0.253	0.048	6.98112e-08	0.00207584	0.127937	0.074	0.104	0.34403	1	-0.309131	0.121	0.111	0.871147	1	0.141299	0.216	0.192	0.42061	1	0.208189	0.056	0.077	0.176241	1	0.461215	0.201	0.122	0.00685058	1
Gm38182	0.571504	0.534	0.222	6.99935e-08	0.00208126	0.0168481	0.336	0.327	0.716445	1	0.186768	0.414	0.5	0.337586	1	0.637158	0.461	0.319	1.89426e-05	0.563259	-0.0055265	0.242	0.313	0.0311572	1	0.0551739	0.316	0.388	0.0689922	1
Scoc	0.425128	0.671	0.344	7.0465e-08	0.00209528	0.0172565	0.443	0.494	0.418417	1	-0.433925	0.427	0.519	0.100771	1	-0.294189	0.576	0.577	0.309162	1	-0.309283	0.276	0.349	0.00936641	1	0.323994	0.452	0.395	0.0792644	1
Nup133	0.347786	0.432	0.153	7.10413e-08	0.00211241	-0.582331	0.254	0.308	0.208631	1	0.0616073	0.408	0.407	0.955422	1	0.180355	0.472	0.285	2.79706e-07	0.00831706	0.364735	0.248	0.294	0.150166	1	0.765086	0.407	0.33	0.012475	1
Vwf	0.395212	0.315	0.085	7.15547e-08	0.00212768	-0.14502	0.098	0.145	0.186885	1	1.07234	0.204	0.157	0.289169	1	-1.05643	0.316	0.407	0.00579519	1	-1.18916	0.054	0.124	7.81945e-05	1	-0.154952	0.294	0.231	0.0477063	1
Ctnnal1	-0.380636	0.034	0.243	7.22363e-08	0.00214795	-0.0671084	0.066	0.154	0.013371	1	2.15585	0.127	0.056	0.0536934	1	-0.638575	0.071	0.199	1.27628e-06	0.0379502	-0.401252	0.062	0.129	0.000153076	1	0.935751	0.11	0.041	0.00079804	1
Sardh	1.62714	0.253	0.048	7.28281e-08	0.00216554	-0.510307	0.115	0.157	0.291999	1	-0.410544	0.121	0.102	0.668323	1	0.441867	0.201	0.155	0.179604	1	-0.483061	0.09	0.129	0.0347862	1	0.0115568	0.163	0.112	0.0591548	1
Mmd	0.445159	0.705	0.37	7.32898e-08	0.00217927	0.68734	0.467	0.403	0.0480376	1	-0.536354	0.561	0.778	0.000145945	1	0.317464	0.565	0.412	3.39963e-05	1	0.384626	0.293	0.296	0.96026	1	0.344998	0.498	0.483	0.506359	1
She	0.206349	0.781	0.46	7.33605e-08	0.00218138	-0.316781	0.598	0.591	0.55977	1	-0.334432	0.605	0.806	2.71928e-05	0.808578	0.67495	0.747	0.695	8.52618e-05	1	-0.281419	0.45	0.57	0.000272591	1	-0.379349	0.641	0.813	1.17477e-08	0.000349319
Cmas	0.025122	0.596	0.302	7.33631e-08	0.00218145	-0.763898	0.369	0.374	0.594924	1	0.358326	0.497	0.565	0.334472	1	-0.317847	0.286	0.308	0.407388	1	-0.837555	0.077	0.162	7.84344e-06	0.233225	-0.279382	0.177	0.204	0.448531	1
Gm21769	0.420251	0.747	0.481	7.38266e-08	0.00219523	-0.0626752	0.68	0.657	0.811036	1	-0.0225601	0.682	0.694	0.846948	1	0.24687	0.747	0.635	0.000669295	1	-0.10705	0.555	0.615	0.0156688	1	0.443003	0.73	0.697	0.0517032	1
Hipk3	0.898657	0.514	0.217	7.49949e-08	0.00222997	-0.38007	0.238	0.23	0.945817	1	0.638753	0.293	0.306	0.940521	1	0.793848	0.439	0.283	1.52989e-05	0.454912	-0.206271	0.163	0.266	5.53996e-05	1	0.320635	0.27	0.31	0.248959	1
Poc5	0.54048	0.466	0.18	7.60328e-08	0.00226084	0.232931	0.205	0.145	0.139328	1	-0.213639	0.261	0.25	0.916226	1	0.663846	0.416	0.252	7.15751e-06	0.212829	0.100123	0.109	0.137	0.186323	1	-0.0493074	0.211	0.218	0.938867	1
Nudt14	0.612776	0.445	0.164	7.71546e-08	0.00229419	-0.387217	0.27	0.44	0.00170313	1	-0.285064	0.452	0.472	0.428648	1	0.0572367	0.517	0.482	0.609804	1	-0.364233	0.22	0.338	3.36726e-05	1	-0.0408932	0.419	0.429	0.913595	1
Vhl	0.561346	0.425	0.164	7.82714e-08	0.0023274	-0.698266	0.213	0.289	0.0697648	1	-0.990165	0.28	0.296	0.509908	1	0.309527	0.409	0.369	0.252961	1	0.0613766	0.191	0.222	0.303179	1	0.158026	0.292	0.276	0.695524	1
Rnpepl1	0.608643	0.753	0.434	7.8439e-08	0.00233238	0.730351	0.623	0.563	0.0668391	1	-0.367947	0.592	0.676	0.0532907	1	0.241503	0.751	0.622	0.00029478	1	0.23062	0.531	0.509	0.41481	1	-0.11078	0.545	0.636	0.0182159	1
Rere	0.0189424	0.76	0.407	7.9205e-08	0.00235516	0.242202	0.418	0.557	0.0990758	1	-0.129239	0.554	0.611	0.246252	1	0.265424	0.647	0.58	0.0940678	1	0.068919	0.418	0.493	0.128596	1	0.0829198	0.581	0.568	0.944743	1
Col4a2	0.645287	0.897	0.778	8.07866e-08	0.00240219	0.231804	0.852	0.884	0.796578	1	-0.500807	0.828	0.944	2.42837e-05	0.722075	0.320108	0.914	0.867	7.21041e-05	1	-0.0544458	0.792	0.821	0.362693	1	-0.432692	0.775	0.935	7.5114e-10	2.23351e-05
Sec31a	0.467857	0.699	0.392	8.26314e-08	0.00245704	0.309858	0.492	0.55	0.869841	1	0.245265	0.643	0.731	0.547649	1	0.346616	0.665	0.608	0.00521289	1	-0.241131	0.409	0.503	0.0056756	1	-0.0897046	0.62	0.599	0.863853	1
Dnm3	0.226644	0.685	0.397	8.42654e-08	0.00250563	-0.598779	0.516	0.494	0.982857	1	-0.237753	0.49	0.676	0.00327701	1	0.236746	0.743	0.644	8.9803e-05	1	0.365031	0.55	0.527	0.123463	1	-0.182348	0.636	0.718	0.00220556	1
Ctso	0.179444	0.842	0.54	8.66323e-08	0.00257601	-0.37612	0.508	0.676	0.0014077	1	0.307436	0.809	0.843	0.899125	1	0.0206481	0.788	0.732	0.0199924	1	0.0949621	0.565	0.637	0.319735	1	0.108721	0.782	0.752	0.395074	1
Card6	1.04328	0.452	0.19	8.67206e-08	0.00257864	0.24501	0.213	0.22	0.98012	1	0.616249	0.376	0.296	0.25051	1	0.348434	0.454	0.314	5.93262e-05	1	0.153104	0.178	0.18	0.969469	1	-0.200366	0.313	0.323	0.532175	1
Itsn2	0.131708	0.781	0.455	8.71844e-08	0.00259243	-0.0860396	0.385	0.55	0.00863312	1	-0.1264	0.58	0.713	0.0228671	1	0.176467	0.725	0.666	0.0154839	1	-0.107013	0.371	0.481	0.000599176	1	0.0890355	0.605	0.629	0.674793	1
Tab2	0.810116	0.384	0.132	8.91038e-08	0.0026495	-0.59221	0.09	0.16	0.0612473	1	0.519846	0.217	0.213	0.89347	1	0.0236857	0.312	0.308	0.862703	1	-0.346971	0.062	0.112	0.00380932	1	-0.2439	0.239	0.245	0.853555	1
Maml1	0.881915	0.384	0.122	8.93867e-08	0.00265791	1.1078	0.123	0.129	0.982691	1	1.13559	0.166	0.213	0.449399	1	0.716932	0.297	0.179	0.000416603	1	0.407469	0.116	0.098	0.319259	1	-0.700099	0.146	0.197	0.0552853	1
Zfp266	0.553143	0.397	0.138	9.16707e-08	0.00272583	-0.206479	0.197	0.274	0.0957221	1	-0.390144	0.21	0.407	0.000639104	1	0.508881	0.428	0.369	0.202897	1	0.484498	0.18	0.203	0.434248	1	-0.245819	0.251	0.391	2.58017e-05	0.767213
Cpq	0.441904	0.37	0.116	9.21116e-08	0.00273894	0.953964	0.18	0.123	0.127761	1	-2.32582	0.134	0.204	0.12145	1	0.69162	0.416	0.301	0.000351337	1	-0.0538195	0.154	0.146	0.757624	1	0.0550774	0.187	0.289	0.00386154	1
Yipf6	0.463943	0.479	0.196	9.40861e-08	0.00279765	0.0645086	0.213	0.302	0.12416	1	-0.375629	0.331	0.315	0.807112	1	0.188055	0.454	0.476	0.488309	1	0.502374	0.171	0.213	0.127017	1	-0.0703933	0.423	0.354	0.105245	1
Vezf1	0.31439	0.829	0.45	9.43757e-08	0.00280626	0.207647	0.459	0.519	0.451646	1	-0.0845341	0.573	0.667	0.125829	1	0.337202	0.758	0.642	0.0143283	1	-0.122635	0.313	0.418	0.000606801	1	0.265946	0.569	0.612	0.466186	1
Skp1a	0.388596	0.897	0.693	9.59168e-08	0.00285209	-0.379804	0.598	0.742	0.00602964	1	-0.107043	0.79	0.935	0.0582602	1	-0.410797	0.799	0.801	0.471555	1	-0.50417	0.465	0.684	1.32434e-11	3.93792e-07	-0.114826	0.766	0.871	0.0382272	1
Vmac	0.709167	0.411	0.159	9.59812e-08	0.002854	-0.706703	0.221	0.355	0.00454901	1	0.381399	0.497	0.315	0.0132594	1	0.679076	0.416	0.325	0.0101455	1	-0.202795	0.248	0.344	0.000637611	1	1.03964	0.443	0.347	0.000804156	1
Tbc1d22a	0.00956681	0.568	0.27	9.7398e-08	0.00289613	-0.101995	0.426	0.45	0.618729	1	-0.0995918	0.446	0.602	0.00539483	1	0.786139	0.561	0.493	0.00663496	1	0.0137506	0.371	0.399	0.446638	1	-0.327061	0.438	0.595	1.71785e-06	0.0510802
Gramd1a	0.656405	0.541	0.27	9.74279e-08	0.00289702	0.353979	0.434	0.509	0.399415	1	0.306776	0.401	0.417	0.786902	1	0.239753	0.498	0.476	0.452079	1	-0.103928	0.392	0.495	0.00128602	1	0.204737	0.5	0.456	0.0970143	1
B230219D22Rik	0.570035	0.767	0.481	1.00772e-07	0.00299645	0.0199477	0.533	0.585	0.584516	1	-0.336972	0.618	0.806	0.000615094	1	-0.239977	0.699	0.69	0.990272	1	-0.29136	0.326	0.46	2.64736e-05	0.787193	-0.481028	0.677	0.772	1.05139e-05	0.31263
Slc52a3	0.390013	0.425	0.169	1.00802e-07	0.00299734	0.650541	0.369	0.311	0.411978	1	1.2619	0.344	0.315	0.542949	1	0.643033	0.468	0.458	0.500803	1	0.0301886	0.422	0.4	0.47095	1	-0.509569	0.39	0.497	0.00242475	1
Fbxo34	0.358898	0.26	0.053	1.02263e-07	0.00304078	0.930285	0.139	0.069	0.0198114	1	1.88102	0.127	0.157	0.567897	1	0.688219	0.268	0.119	7.59454e-07	0.0225824	-0.654334	0.064	0.069	0.707851	1	0.120316	0.134	0.129	0.884711	1
Hoxb3os	0.33995	0.575	0.249	1.03058e-07	0.00306444	0.0200398	0.279	0.387	0.100017	1	0.103114	0.439	0.389	0.502572	1	-0.181621	0.48	0.447	0.600782	1	0.0229469	0.244	0.27	0.434442	1	-0.180792	0.438	0.452	0.863728	1
Hsph1	-1.30999	0.473	0.698	1.03865e-07	0.00308843	-0.582265	0.385	0.434	0.187756	1	1.34426	0.58	0.315	1.03216e-06	0.0306914	-0.745719	0.494	0.737	5.49427e-14	1.63372e-09	0.156786	0.285	0.383	0.00202524	1	0.916228	0.481	0.272	2.8814e-10	8.56785e-06
Hspg2	0.337177	0.829	0.54	1.04465e-07	0.00310628	-0.384044	0.795	0.792	0.106373	1	0.106247	0.72	0.741	0.762378	1	0.453432	0.903	0.821	2.47849e-05	0.73698	0.25986	0.887	0.89	0.186619	1	-0.819563	0.758	0.884	4.02286e-14	1.1962e-09
Ddi2	0.880117	0.356	0.101	1.0462e-07	0.00311088	-0.0657032	0.238	0.255	0.628714	1	-0.083874	0.369	0.463	0.120356	1	0.336284	0.39	0.338	0.122716	1	-0.248237	0.171	0.225	0.0347544	1	-0.0659908	0.352	0.401	0.232046	1
Kansl3	0.204072	0.575	0.28	1.05325e-07	0.00313185	-0.646227	0.27	0.352	0.0628629	1	-0.0984434	0.382	0.5	0.0504814	1	0.0792873	0.584	0.48	0.0234684	1	0.462621	0.248	0.28	0.403648	1	0.0430998	0.349	0.367	0.551211	1
Rpl22	-0.0933068	0.856	0.492	1.06159e-07	0.00315665	-0.363493	0.738	0.827	0.0482314	1	0.409282	0.701	0.694	0.544928	1	-0.0514121	0.788	0.697	0.26875	1	-0.147768	0.662	0.753	0.00035182	1	-0.0886799	0.653	0.639	0.809351	1
Rassf9	-0.443825	0.452	0.169	1.0684e-07	0.00317687	-0.0668198	0.254	0.211	0.238068	1	-0.219814	0.236	0.343	0.03928	1	0.532035	0.639	0.529	0.00194919	1	0.121723	0.381	0.359	0.398158	1	-0.0703196	0.44	0.534	0.00442831	1
Trpv4	0.104522	0.507	0.228	1.07351e-07	0.00319208	-0.028069	0.148	0.17	0.595358	1	1.4785	0.299	0.269	0.389088	1	0.00618794	0.498	0.5	0.306675	1	-0.23953	0.163	0.194	0.193864	1	-0.048026	0.301	0.245	0.085031	1
Cirbp	0.364989	0.63	0.333	1.09404e-07	0.00325314	-0.647486	0.393	0.623	2.48841e-06	0.0739928	-0.933345	0.58	0.796	1.27564e-08	0.000379312	0.108811	0.669	0.657	0.399748	1	-0.452544	0.398	0.603	6.37598e-10	1.8959e-05	-0.322834	0.656	0.81	3.37041e-07	0.0100219
Fgd2	1.98587	0.205	0.026	1.11364e-07	0.00331141	0.266555	0.123	0.11	0.717559	1	0.147022	0.166	0.139	0.455388	1	-0.177599	0.152	0.111	0.126179	1	-0.0980796	0.141	0.117	0.214719	1	0.422766	0.115	0.133	0.547123	1
Scamp1	0.00926201	0.699	0.349	1.12066e-07	0.00333229	0.701496	0.352	0.374	0.895977	1	-0.394068	0.516	0.611	0.0612872	1	-0.247229	0.643	0.617	0.546644	1	-0.206913	0.244	0.351	0.00025671	1	0.266707	0.536	0.517	0.210989	1
Uba1	0.288274	0.884	0.672	1.12599e-07	0.00334812	0.00905228	0.795	0.846	0.604484	1	0.369612	0.873	0.843	0.231529	1	0.0774761	0.888	0.827	0.12849	1	0.228662	0.822	0.799	0.0178221	1	0.0933177	0.782	0.779	0.479191	1
Fbxl12	0.381721	0.459	0.169	1.14059e-07	0.00339154	-0.12526	0.254	0.381	0.0122546	1	-0.566846	0.306	0.491	0.000887597	1	0.262937	0.405	0.301	0.00525017	1	-0.34699	0.244	0.294	0.042313	1	0.153245	0.438	0.384	0.172281	1
Spry2	0.188659	0.767	0.492	1.14331e-07	0.00339964	-0.558571	0.328	0.387	0.309845	1	-0.565662	0.529	0.833	1.09914e-05	0.326828	0.0439116	0.717	0.577	0.000317315	1	-0.594476	0.235	0.337	0.000507028	1	-0.373057	0.675	0.844	9.87046e-06	0.293498
C77080	1.0892	0.329	0.09	1.14948e-07	0.00341797	-0.0369197	0.139	0.16	0.682731	1	0.556973	0.134	0.185	0.310238	1	-0.649096	0.219	0.25	0.208278	1	0.054412	0.069	0.079	0.569172	1	0.0259819	0.1	0.129	0.249679	1
Tmem87a	0.0831718	0.76	0.487	1.15008e-07	0.00341977	-0.390751	0.525	0.651	0.00541488	1	0.0119685	0.682	0.741	0.469745	1	0.60108	0.792	0.686	9.8949e-08	0.00294225	-0.156074	0.443	0.56	0.000999469	1	0.232893	0.703	0.66	0.0511351	1
Tmem47	0.795764	0.562	0.275	1.16189e-07	0.00345489	0.133662	0.32	0.336	0.994416	1	-0.366625	0.51	0.639	0.016573	1	0.35973	0.565	0.549	0.334687	1	0.447051	0.278	0.27	0.454008	1	0.068805	0.524	0.514	0.93775	1
Tfpi	0.464416	0.651	0.354	1.16193e-07	0.003455	-0.0387184	0.352	0.462	0.0895318	1	0.214141	0.516	0.565	0.486756	1	0.677102	0.639	0.551	0.00230229	1	0.0475815	0.298	0.364	0.0519383	1	-0.084637	0.49	0.476	0.935074	1
Urgcp	0.968279	0.479	0.196	1.16251e-07	0.00345671	0.69315	0.361	0.34	0.370277	1	0.175819	0.369	0.454	0.097819	1	0.323084	0.442	0.434	0.603696	1	-0.0387649	0.274	0.325	0.113747	1	-0.15773	0.364	0.371	0.555585	1
Ifitm10	0.365117	0.486	0.212	1.18096e-07	0.00351158	0.0607614	0.352	0.283	0.221396	1	0.000547154	0.427	0.444	0.621972	1	0.464075	0.602	0.491	0.00165174	1	0.807485	0.381	0.271	5.054e-06	0.150281	-0.422372	0.435	0.517	0.00684616	1
Taf6l	0.594521	0.603	0.291	1.18887e-07	0.00353512	0.0111163	0.549	0.566	0.812172	1	-0.346751	0.49	0.583	0.146826	1	-0.125646	0.654	0.639	0.785922	1	-0.231142	0.392	0.493	0.0019363	1	-0.115025	0.627	0.595	0.55959	1
Smad6	0.664266	0.747	0.434	1.23443e-07	0.00367056	0.422252	0.623	0.585	0.0284253	1	-0.553213	0.637	0.769	0.00141068	1	-0.00338207	0.491	0.407	0.0920203	1	0.632067	0.27	0.259	0.529636	1	-0.474207	0.388	0.49	0.00276985	1
Pik3r3	0.12679	0.76	0.402	1.23834e-07	0.00368221	0.0543215	0.492	0.544	0.452793	1	-0.159666	0.522	0.694	0.0116089	1	0.740042	0.669	0.597	0.000135001	1	0.431633	0.42	0.397	0.157946	1	-0.607667	0.565	0.701	1.49694e-06	0.0445116
Akt1s1	0.698506	0.507	0.228	1.27963e-07	0.00380497	-0.221968	0.311	0.409	0.055596	1	0.0688354	0.389	0.444	0.406013	1	-0.222341	0.42	0.522	0.000951213	1	-0.0821336	0.304	0.376	0.0306232	1	0.0794956	0.445	0.33	0.00227006	1
Pik3r4	0.474158	0.493	0.206	1.28626e-07	0.00382469	0.342719	0.32	0.245	0.0970172	1	-0.298929	0.331	0.481	0.0188145	1	0.380738	0.472	0.412	0.09385	1	0.268285	0.266	0.216	0.0597722	1	-0.222737	0.383	0.469	0.0243217	1
Pck2	0.732479	0.596	0.307	1.28682e-07	0.00382635	-0.0610217	0.451	0.506	0.135897	1	0.155345	0.478	0.426	0.556297	1	0.572592	0.565	0.551	0.262359	1	0.332362	0.508	0.488	0.0651326	1	-0.0398617	0.493	0.483	0.943423	1
RP24-360B3.1	-0.393919	0.603	0.28	1.3155e-07	0.00391163	-0.335995	0.418	0.425	0.913916	1	-0.361973	0.28	0.352	0.150711	1	-0.75189	0.669	0.299	6.88552e-21	2.04741e-16	-1.64862	0.341	0.433	0.000575625	1	0.31983	0.254	0.299	0.262463	1
D630036G22Rik	-1.47052	0.205	0.026	1.32766e-07	0.0039478	-0.865904	0.033	0.063	0.208116	1	-1.8526	0.032	0.056	0.336809	1	1.10896	0.26	0.077	7.23604e-12	2.15164e-07	0.359804	0.047	0.065	0.201113	1	-0.941943	0.065	0.078	0.482312	1
Dnajc5	0.511333	0.664	0.354	1.33526e-07	0.00397038	-0.0327303	0.418	0.484	0.290719	1	0.347261	0.611	0.583	0.843626	1	0.0238887	0.613	0.597	0.750001	1	-0.272617	0.302	0.428	1.33251e-05	0.39622	0.26531	0.581	0.514	0.031582	1
Osgepl1	0.184193	0.411	0.138	1.35011e-07	0.00401457	0.575897	0.148	0.148	0.889384	1	-0.380699	0.197	0.333	0.00835281	1	-0.240824	0.383	0.292	0.0629907	1	-0.0493634	0.116	0.162	0.0379941	1	0.106458	0.258	0.367	0.0113864	1
Fkbp5	2.22692	0.301	0.079	1.35039e-07	0.00401538	0.415166	0.23	0.079	1.54544e-05	0.459536	-1.50551	0.229	0.259	0.436044	1	0.488416	0.361	0.162	1.86705e-09	5.55167e-05	1.31515	0.193	0.069	3.5781e-10	1.06395e-05	-0.03105	0.313	0.337	0.442635	1
Shoc2	0.265705	0.699	0.386	1.36596e-07	0.00406168	-0.178591	0.32	0.362	0.413286	1	-0.282204	0.478	0.602	0.0171454	1	0.19237	0.61	0.56	0.218366	1	-0.0234777	0.248	0.32	0.0179869	1	-0.187911	0.478	0.551	0.056513	1
Abcc4	0.75732	0.61	0.339	1.37992e-07	0.00410318	0.504708	0.467	0.393	0.0994072	1	-0.104114	0.427	0.546	0.0396954	1	0.626678	0.61	0.487	0.000220046	1	-0.0121359	0.293	0.299	0.796517	1	-0.253197	0.414	0.493	0.0121453	1
Olfml2b	0.37689	0.671	0.349	1.38967e-07	0.00413217	-0.617093	0.41	0.67	3.76495e-06	0.111951	0.906984	0.637	0.426	0.000281191	1	0.287146	0.513	0.436	0.0998627	1	-0.174845	0.27	0.495	6.0865e-12	1.80982e-07	1.163	0.476	0.214	3.56336e-14	1.05956e-09
Pgpep1	-0.206156	0.486	0.185	1.40597e-07	0.00418064	0.476731	0.246	0.214	0.371283	1	0.0865564	0.261	0.204	0.309017	1	-0.242009	0.424	0.374	0.513393	1	0.368303	0.199	0.199	0.943277	1	-0.137411	0.333	0.255	0.0416223	1
Ublcp1	0.737703	0.418	0.143	1.42224e-07	0.00422902	-0.397533	0.189	0.201	0.807336	1	0.188792	0.268	0.343	0.241334	1	0.457569	0.424	0.35	0.0475396	1	-0.0541621	0.131	0.167	0.096498	1	-0.492669	0.266	0.276	0.600375	1
Gm26904	-0.203796	0.048	0.27	1.42381e-07	0.00423371	-0.314938	0.156	0.22	0.148517	1	0.816952	0.166	0.056	0.00890761	1	0.27392	0.082	0.188	0.000117963	1	0.141984	0.148	0.172	0.365162	1	0.426919	0.139	0.054	0.000342786	1
Rgs2	0.566701	0.548	0.27	1.42675e-07	0.00424245	0.195653	0.23	0.39	0.00559192	1	-0.955962	0.344	0.398	0.2414	1	0.672541	0.509	0.361	3.80385e-05	1	-0.125576	0.18	0.289	6.58622e-05	1	-0.282502	0.263	0.354	0.0530656	1
Slc6a6	0.45461	1	0.974	1.4406e-07	0.00428364	0.158745	0.992	1	0.222541	1	0.0392261	1	1	0.62518	1	0.511761	1	0.976	5.74192e-15	1.70736e-10	0.43177	0.994	0.99	9.85482e-14	2.93033e-09	-0.346307	0.998	1	1.68028e-09	4.99633e-05
Aldh6a1	0.176104	0.493	0.206	1.44799e-07	0.0043056	0.214977	0.262	0.261	0.998703	1	0.208409	0.446	0.398	0.59821	1	-0.0270545	0.416	0.407	0.47103	1	0.206744	0.236	0.229	0.64429	1	0.445983	0.478	0.35	0.000363215	1
Rsad2	-0.27124	0.979	0.921	1.45089e-07	0.00431422	-0.292003	0.918	0.928	0.0797785	1	0.223222	0.962	0.944	0.519893	1	0.23413	1	0.969	0.00221319	1	-0.0390911	0.957	0.966	0.372834	1	0.100441	0.978	0.976	0.302357	1
Fkbp14	0.611008	0.363	0.122	1.46968e-07	0.00437009	0.0780565	0.131	0.157	0.563465	1	-2.49251	0.172	0.306	0.00425027	1	0.28917	0.29	0.226	0.0484941	1	-0.146006	0.116	0.11	0.782382	1	0.199227	0.175	0.241	0.0327999	1
Mrpl57	0.469037	0.5	0.196	1.52367e-07	0.00453064	-0.135448	0.377	0.406	0.518534	1	-0.602277	0.408	0.565	0.00665912	1	0.125792	0.398	0.363	0.342095	1	-0.791642	0.24	0.368	3.09264e-06	0.0919597	-0.401467	0.428	0.469	0.277808	1
Syt11	1.32259	0.692	0.439	1.54935e-07	0.004607	0.308802	0.303	0.381	0.416352	1	-0.665558	0.484	0.546	0.0836446	1	0.406838	0.669	0.456	1.70004e-08	0.000505507	-0.0442753	0.199	0.357	4.55138e-08	0.00135335	0.39521	0.445	0.537	0.119999	1
Mgst1	0.148162	0.61	0.312	1.54957e-07	0.00460765	-0.274074	0.41	0.497	0.0941363	1	-0.60465	0.631	0.713	0.0306975	1	-0.0840812	0.595	0.597	0.578224	1	0.114062	0.411	0.483	0.135433	1	-0.370005	0.727	0.83	0.00230741	1
Ripply3	0.419563	0.877	0.624	1.55703e-07	0.00462982	-0.107688	0.77	0.871	0.248078	1	-0.254288	0.803	0.917	0.00860469	1	0.0289108	0.929	0.869	0.223825	1	0.078193	0.779	0.816	0.687383	1	-0.32292	0.837	0.929	1.45528e-05	0.432726
Hadha	0.426545	0.801	0.524	1.56603e-07	0.00465658	-0.254456	0.607	0.682	0.0763757	1	0.29658	0.701	0.713	0.738553	1	0.205351	0.799	0.73	0.0331567	1	-0.0128174	0.576	0.632	0.302208	1	0.0830112	0.689	0.701	0.725379	1
Prep	0.481293	0.555	0.259	1.57692e-07	0.00468897	0.26488	0.238	0.327	0.12076	1	0.0810015	0.433	0.315	0.10663	1	-0.433096	0.491	0.527	0.0373401	1	-0.384781	0.263	0.363	0.000575529	1	0.193874	0.447	0.289	1.3464e-05	0.400353
Tex264	0.169527	0.733	0.402	1.59072e-07	0.00473001	0.128586	0.582	0.654	0.32736	1	0.607985	0.688	0.546	0.00679215	1	-0.0562914	0.743	0.701	0.432021	1	-0.332967	0.495	0.582	0.0130242	1	0.0445543	0.653	0.622	0.152963	1
Emc1	0.659323	0.548	0.265	1.6105e-07	0.00478881	0.194317	0.377	0.387	0.862152	1	0.328026	0.516	0.556	0.620607	1	0.456366	0.569	0.522	0.252265	1	0.117871	0.3	0.351	0.137915	1	-0.815424	0.447	0.585	4.02346e-05	1
Stk35	1.3741	0.281	0.069	1.6385e-07	0.00487209	0.10619	0.131	0.11	0.578758	1	-0.342071	0.153	0.194	0.365341	1	0.0522926	0.219	0.215	0.865689	1	-0.198605	0.073	0.089	0.349544	1	0.427971	0.151	0.167	0.58264	1
Dcp1a	1.03221	0.308	0.085	1.64271e-07	0.00488461	-0.749786	0.09	0.142	0.141311	1	-0.301285	0.153	0.222	0.141345	1	0.84534	0.283	0.148	1.62758e-05	0.483961	-0.292073	0.09	0.1	0.583013	1	-0.136844	0.11	0.194	0.00165526	1
Tbxa2r	0.436683	0.973	0.709	1.66475e-07	0.00495012	0.139392	0.934	0.981	0.881825	1	-0.223778	0.879	0.917	0.0457516	1	0.426287	0.978	0.85	1.92898e-06	0.0573581	0.17081	0.925	0.94	0.303879	1	-0.30439	0.797	0.837	0.000962535	1
Wdsub1	0.390204	0.479	0.201	1.68323e-07	0.00500509	-0.412563	0.238	0.321	0.0958807	1	0.155447	0.369	0.37	0.963188	1	-0.0544162	0.416	0.473	0.154935	1	-0.0923552	0.231	0.275	0.0872458	1	-0.0747553	0.366	0.378	0.794799	1
Hnrnpab	0.261211	0.726	0.402	1.71934e-07	0.00511245	-0.529831	0.475	0.66	0.000318975	1	-0.417806	0.605	0.685	0.0608746	1	0.193161	0.71	0.673	0.731549	1	-0.418087	0.375	0.558	2.40731e-08	0.000715813	-0.480373	0.584	0.667	0.00905216	1
Mfn1	0.0247195	0.61	0.339	1.78226e-07	0.00529955	-0.117983	0.336	0.418	0.104489	1	0.10763	0.465	0.694	0.000101968	1	0.790199	0.628	0.451	6.00368e-06	0.17852	-0.434833	0.206	0.326	2.55196e-06	0.0758826	-0.495936	0.416	0.653	6.30542e-09	0.000187492
Gm16048	0.512754	0.747	0.429	1.81106e-07	0.00538518	0.417967	0.607	0.579	0.111176	1	-0.00523132	0.675	0.713	0.672851	1	0.330859	0.755	0.606	5.96705e-07	0.017743	0.160951	0.627	0.617	0.0538299	1	-0.179646	0.684	0.776	0.00406576	1
Gapdh	0.361602	0.979	0.868	1.82268e-07	0.00541974	0.173639	0.943	0.965	0.10421	1	-0.117067	0.93	0.935	0.120405	1	0.252242	0.993	0.892	6.44031e-08	0.00191503	0.18176	0.951	0.938	0.00139905	1	-0.424463	0.909	0.963	1.26915e-14	3.77381e-10
Mgst3	0.0514566	0.534	0.206	1.82587e-07	0.00542923	0.280581	0.344	0.396	0.728305	1	-0.661049	0.369	0.556	0.00196163	1	0.153392	0.431	0.454	0.428526	1	-0.227347	0.174	0.27	0.000439826	1	-0.447153	0.395	0.5	0.022977	1
Dnajc3	0.323436	0.877	0.624	1.84139e-07	0.00547536	-0.138505	0.672	0.73	0.164433	1	-0.101119	0.783	0.917	0.0307608	1	0.173662	0.881	0.812	0.00393698	1	0.000733702	0.595	0.675	0.0433051	1	-0.326265	0.778	0.861	0.000266083	1
Specc1l	0.273504	0.616	0.291	1.84157e-07	0.00547592	-0.251075	0.393	0.418	0.472421	1	-0.107963	0.395	0.574	0.0135173	1	0.326813	0.613	0.502	0.00322578	1	0.114145	0.34	0.404	0.0738628	1	-0.277502	0.445	0.459	0.461528	1
Aplnr	0.367384	0.76	0.571	1.84738e-07	0.00549317	0.211651	0.525	0.748	8.84037e-07	0.0262868	0.117931	0.745	0.5	1.8554e-06	0.0551703	0.0490378	0.84	0.808	0.765885	1	-0.547825	0.664	0.835	7.89554e-15	2.34774e-10	1.16572	0.811	0.534	1.25135e-21	3.72088e-17
Eftud2	0.404187	0.767	0.471	1.85402e-07	0.00551293	0.24134	0.557	0.528	0.470575	1	0.294768	0.554	0.62	0.452324	1	-0.0950929	0.706	0.695	0.606112	1	0.457548	0.518	0.519	0.276266	1	-0.07338	0.617	0.656	0.411143	1
Gapvd1	0.616284	0.527	0.254	1.85809e-07	0.00552504	0.255266	0.344	0.39	0.387588	1	0.31508	0.478	0.481	0.945973	1	0.279803	0.528	0.515	0.856279	1	0.148763	0.278	0.351	0.031916	1	0.120567	0.447	0.493	0.329585	1
Thsd1	0.281276	0.74	0.46	1.89779e-07	0.00564309	-0.177353	0.434	0.553	0.0380317	1	0.427289	0.561	0.676	0.304659	1	0.655387	0.773	0.628	8.58921e-06	0.2554	0.235432	0.497	0.534	0.880968	1	0.29114	0.617	0.602	0.467291	1
Abr	0.119329	0.747	0.434	1.91202e-07	0.00568538	0.528024	0.467	0.431	0.32983	1	0.0203363	0.529	0.519	0.96213	1	0.703153	0.703	0.624	6.48102e-06	0.192713	-0.150573	0.332	0.356	0.581874	1	-0.203572	0.488	0.52	0.510209	1
Ergic1	0.934625	0.562	0.275	1.92041e-07	0.00571033	-0.102617	0.467	0.472	0.657512	1	0.0962319	0.471	0.454	0.93781	1	0.256315	0.472	0.361	0.00840938	1	-0.125758	0.37	0.483	0.000940574	1	-0.0291825	0.481	0.432	0.0769104	1
Thrsp	0.147328	0.692	0.407	1.93758e-07	0.0057614	0.551664	0.713	0.531	0.000161461	1	0.0534154	0.631	0.852	0.0087577	1	0.280621	0.855	0.77	0.00618906	1	0.532255	0.833	0.708	2.52268e-12	7.5012e-08	-0.247751	0.866	0.908	0.00862849	1
Nucks1	0.502197	0.445	0.164	1.96528e-07	0.00584377	-0.0653902	0.197	0.27	0.164017	1	-0.200779	0.357	0.444	0.118699	1	0.00701631	0.368	0.347	0.495356	1	-0.617982	0.144	0.223	0.000708243	1	-0.278194	0.409	0.439	0.152321	1
Ehd2	0.100072	0.863	0.624	1.97129e-07	0.00586162	-0.0230138	0.598	0.761	0.01861	1	0.164273	0.854	0.806	0.1173	1	0.225338	0.929	0.876	0.00196302	1	0.144686	0.702	0.796	0.00551686	1	0.152677	0.811	0.857	0.542055	1
Wdr7	1.47356	0.295	0.079	1.97417e-07	0.00587018	0.484781	0.148	0.151	0.962901	1	0.854024	0.191	0.176	0.725056	1	0.0241906	0.208	0.212	0.774921	1	0.38895	0.111	0.12	0.650761	1	-0.562738	0.165	0.211	0.0795543	1
Atf6	1.13802	0.466	0.212	2.02496e-07	0.00602123	-0.161835	0.287	0.368	0.243225	1	0.046508	0.363	0.389	0.506724	1	-0.492826	0.39	0.423	0.265519	1	-0.456007	0.205	0.287	0.00314124	1	-0.451084	0.297	0.422	0.000484295	1
Eml3	0.762061	0.445	0.18	2.02565e-07	0.00602327	-0.662991	0.303	0.39	0.0589461	1	-0.398725	0.408	0.324	0.523089	1	-0.0422312	0.42	0.405	0.608183	1	0.434726	0.298	0.347	0.257525	1	-0.344125	0.373	0.425	0.129757	1
Efcc1	0.340084	0.178	0.016	2.06292e-07	0.00613408	-0.0677118	0.074	0.113	0.227648	1	-0.362743	0.076	0.157	0.0311576	1	-0.0577788	0.089	0.086	0.891921	1	-0.100099	0.019	0.055	0.00148259	1	-0.235242	0.05	0.129	0.000179602	1
Sh3bp1	0.774232	0.336	0.095	2.06417e-07	0.00613781	0.445945	0.148	0.211	0.220754	1	1.04338	0.223	0.111	0.0186173	1	-1.059	0.178	0.153	0.480842	1	0.0178548	0.039	0.079	0.0063173	1	-0.332642	0.098	0.092	0.772702	1
Fgfr3	0.385007	0.781	0.444	2.09919e-07	0.00624195	0.263289	0.5	0.604	0.435595	1	0.696353	0.682	0.602	0.0269653	1	0.547591	0.736	0.622	0.000175277	1	0.826481	0.377	0.421	0.710623	1	-0.696245	0.548	0.503	0.579153	1
Rc3h1	0.553635	0.712	0.429	2.11521e-07	0.00628957	0.0690039	0.451	0.503	0.366551	1	-0.0467262	0.465	0.602	0.0190917	1	0.469683	0.632	0.522	0.00126079	1	0.0196537	0.311	0.352	0.156609	1	-0.230929	0.514	0.588	0.0158823	1
Cep97	0.0538764	0.664	0.354	2.13489e-07	0.0063481	0.403801	0.5	0.472	0.367408	1	0.302579	0.344	0.389	0.752326	1	0.447827	0.77	0.31	6.79526e-32	2.02057e-27	-0.0921322	0.441	0.428	0.594949	1	0.250243	0.244	0.408	2.24877e-05	0.668672
Hiatl1	0.274256	0.719	0.397	2.13932e-07	0.00636127	0.127473	0.443	0.513	0.291987	1	0.0789026	0.643	0.694	0.556637	1	0.542329	0.725	0.617	2.11312e-05	0.628337	0.0926223	0.388	0.438	0.290955	1	0.0276353	0.665	0.646	0.847971	1
Thbd	0.344853	0.979	0.931	2.16465e-07	0.00643659	-0.36668	0.943	0.931	0.437724	1	1.07875	0.987	0.981	0.0543648	1	0.252501	0.989	0.96	0.000486291	1	0.205591	0.961	0.966	0.162178	1	-0.134951	0.99	0.99	0.00153303	1
Frmd8	0.559029	0.541	0.249	2.16493e-07	0.00643741	0.1498	0.459	0.377	0.131517	1	-0.384808	0.535	0.519	0.545645	1	0.6847	0.502	0.403	0.00351864	1	0.241435	0.422	0.363	0.0403973	1	0.241417	0.438	0.469	0.688209	1
P2rx7	0.720631	0.555	0.249	2.16553e-07	0.0064392	0.437471	0.328	0.336	0.776543	1	-0.502775	0.376	0.565	0.000875954	1	-0.236474	0.405	0.385	0.627655	1	-0.1088	0.225	0.259	0.177696	1	-0.231587	0.328	0.35	0.523275	1
Kctd5	0.427776	0.575	0.275	2.22585e-07	0.00661857	0.156598	0.344	0.358	0.659032	1	0.607684	0.471	0.38	0.0961217	1	-0.0373771	0.48	0.518	0.151677	1	-0.0774966	0.291	0.328	0.187612	1	0.234966	0.481	0.374	0.0133796	1
Sparcl1	-0.187524	1	0.958	2.22785e-07	0.00662451	0.479828	0.992	0.975	0.0202361	1	-0.369547	1	1	0.00702959	1	0.433632	1	0.991	1.59883e-09	4.75413e-05	0.298434	0.991	0.99	6.30498e-06	0.187479	-0.105729	0.995	0.997	0.0411285	1
Pgam5	0.558822	0.425	0.164	2.24359e-07	0.00667131	-0.0183191	0.189	0.318	0.0127021	1	-0.43286	0.261	0.324	0.254633	1	0.227913	0.357	0.316	0.329189	1	-0.405398	0.178	0.261	0.00099975	1	0.483844	0.397	0.293	0.00589686	1
Necap2	0.361639	0.849	0.566	2.26137e-07	0.00672417	0.0488621	0.697	0.714	0.342671	1	0.0802491	0.694	0.694	0.891401	1	-0.0738487	0.773	0.794	0.051641	1	0.0424443	0.64	0.692	0.0629147	1	0.186807	0.763	0.714	0.308479	1
Klhl6	0.903861	0.658	0.386	2.28808e-07	0.0068036	1.29785	0.557	0.459	0.0161542	1	-0.184573	0.548	0.602	0.475174	1	-0.0468319	0.669	0.695	0.422895	1	0.0367286	0.58	0.627	0.219661	1	0.493051	0.677	0.622	0.0152966	1
Txnip	0.405612	1	1	2.29721e-07	0.00683076	0.269187	1	1	4.07359e-05	1	0.0789607	1	1	0.558709	1	0.104853	1	0.996	0.0194093	1	0.137551	1	1	0.000195315	1	0.107106	1	1	0.0217974	1
Natd1	0.70982	0.349	0.106	2.44736e-07	0.00727723	0.399	0.246	0.258	0.860585	1	0.766268	0.293	0.213	0.184335	1	-0.0866741	0.305	0.29	0.696398	1	0.0198155	0.22	0.196	0.281911	1	-0.499599	0.167	0.245	0.00711928	1
Efr3a	0.171193	0.678	0.376	2.49413e-07	0.0074163	-0.518262	0.32	0.494	0.00104125	1	0.467002	0.58	0.491	0.11525	1	0.28835	0.602	0.588	0.628358	1	0.0511673	0.308	0.345	0.235545	1	-0.135848	0.598	0.592	0.813657	1
Plbd2	0.153638	0.774	0.476	2.51156e-07	0.00746813	0.416431	0.689	0.654	0.0996136	1	-0.350461	0.656	0.769	0.0127563	1	0.521996	0.714	0.635	0.0117708	1	0.4909	0.617	0.562	0.000587173	1	0.129015	0.694	0.67	0.791355	1
Robo4	0.332314	0.986	0.847	2.5198e-07	0.00749262	0.216548	0.967	0.981	0.274242	1	-0.0929634	0.987	0.917	0.85184	1	0.211004	1	0.956	0.000665228	1	-0.0276002	0.974	0.986	0.214816	1	0.235002	0.95	0.942	0.066076	1
Sgsm3	0.181533	0.541	0.249	2.56065e-07	0.00761409	0.383587	0.377	0.311	0.280756	1	0.374488	0.439	0.352	0.169034	1	0.366728	0.517	0.485	0.339792	1	0.379618	0.411	0.332	0.00459199	1	-0.0904717	0.452	0.459	0.765155	1
Clptm1	0.406648	0.945	0.757	2.57083e-07	0.00764436	0.111086	0.869	0.858	0.810129	1	0.153258	0.911	0.907	0.535756	1	0.0450332	0.929	0.858	0.362612	1	0.221412	0.841	0.851	0.343746	1	0.116098	0.854	0.861	0.634431	1
Tomm40	0.642815	0.623	0.344	2.58363e-07	0.00768242	0.0649523	0.369	0.478	0.101812	1	0.0700363	0.459	0.407	0.662683	1	0.0523006	0.591	0.529	0.564809	1	-0.355769	0.298	0.411	0.000180361	1	0.644447	0.505	0.439	0.00808281	1
Synpo	1.01717	0.514	0.233	2.60252e-07	0.0077386	0.444636	0.303	0.248	0.167966	1	-0.364078	0.369	0.546	0.00302451	1	0.173421	0.572	0.482	0.054919	1	-0.188139	0.227	0.256	0.371723	1	-0.280994	0.488	0.548	0.031326	1
Sec22b	0.381208	0.788	0.503	2.60771e-07	0.00775402	0.387583	0.492	0.566	0.551124	1	0.0927789	0.65	0.62	0.901569	1	0.0947425	0.717	0.675	0.974401	1	0.00130586	0.409	0.49	0.0227163	1	-0.0435828	0.644	0.667	0.663056	1
Dctn2	0.264835	0.884	0.619	2.61582e-07	0.00777814	0.141846	0.836	0.827	0.684793	1	0.173187	0.828	0.787	0.310243	1	-0.0859525	0.892	0.794	0.271976	1	0.0827583	0.779	0.818	0.455227	1	0.196556	0.801	0.772	0.483851	1
Mecom	0.570471	0.61	0.328	2.63642e-07	0.00783939	-0.425823	0.32	0.409	0.157235	1	-0.158283	0.433	0.565	0.0300329	1	0.412038	0.572	0.504	0.0227702	1	-0.777129	0.144	0.328	9.60873e-13	2.85716e-08	-0.0944763	0.373	0.354	0.383246	1
Zfp574	0.0688574	0.452	0.175	2.6684e-07	0.00793449	0.150928	0.221	0.302	0.0931039	1	-0.468702	0.268	0.287	0.541024	1	0.544903	0.349	0.281	0.0910031	1	-0.5861	0.131	0.239	1.00643e-05	0.299262	-0.738692	0.215	0.395	5.50772e-07	0.0163772
Slc25a10	1.62179	0.315	0.095	2.69774e-07	0.00802173	0.212633	0.221	0.255	0.545618	1	-0.230277	0.242	0.204	0.530957	1	0.312878	0.283	0.259	0.504121	1	-0.173361	0.189	0.227	0.211757	1	0.18381	0.28	0.262	0.52529	1
Rps6ka4	0.330352	0.678	0.386	2.71849e-07	0.00808344	-0.232827	0.508	0.557	0.188794	1	0.225163	0.471	0.444	0.990786	1	0.447982	0.669	0.591	0.0195192	1	0.215197	0.508	0.524	0.940828	1	0.17605	0.577	0.486	0.022061	1
Tmem44	0.128485	0.767	0.471	2.72296e-07	0.00809672	-0.202327	0.574	0.585	0.759781	1	0.261035	0.713	0.667	0.636583	1	0.550791	0.784	0.701	0.000172794	1	0.188175	0.559	0.596	0.900487	1	0.0205454	0.653	0.663	0.492241	1
Filip1	0.557239	0.397	0.138	2.7367e-07	0.00813758	-0.229718	0.172	0.226	0.194208	1	0.117878	0.344	0.463	0.0620653	1	0.715242	0.483	0.392	0.015266	1	-0.00961733	0.223	0.268	0.0719861	1	-0.155406	0.414	0.483	0.0174618	1
Anks1	0.736405	0.616	0.333	2.75615e-07	0.00819541	0.288215	0.459	0.396	0.47655	1	0.244064	0.439	0.5	0.186186	1	0.457255	0.524	0.414	0.00410347	1	0.0464926	0.298	0.311	0.790747	1	0.0805051	0.359	0.425	0.0525824	1
Bpnt1	0.670221	0.438	0.18	2.75968e-07	0.00820592	-0.34911	0.295	0.239	0.345271	1	0.0911698	0.268	0.324	0.487888	1	0.0542222	0.424	0.438	0.621464	1	-0.0547948	0.174	0.17	0.858374	1	0.238675	0.282	0.235	0.164926	1
Tmem165	0.348817	0.473	0.196	2.80324e-07	0.00833545	-0.265095	0.221	0.34	0.0240313	1	-0.0977004	0.382	0.491	0.0821263	1	0.898358	0.487	0.4	0.00389172	1	-0.443941	0.208	0.284	0.00684837	1	-0.303938	0.349	0.473	0.000422232	1
Hsp90aa1	-0.567999	0.959	0.984	2.82307e-07	0.0083944	-0.697211	0.77	0.915	2.39671e-06	0.0712662	0.464721	0.943	0.88	0.00204435	1	-0.548375	0.907	0.969	7.06116e-07	0.0209964	-0.264618	0.602	0.861	1.11739e-12	3.32255e-08	0.478991	0.844	0.833	0.000510728	1
Pcdh12	0.409616	0.651	0.365	2.84506e-07	0.00845979	0.159402	0.467	0.575	0.0540044	1	0.210608	0.656	0.611	0.657231	1	0.253894	0.636	0.648	0.825844	1	0.0490953	0.448	0.462	0.824231	1	-0.1909	0.627	0.575	0.77055	1
Slx4	0.0611211	0.253	0.053	2.86302e-07	0.0085132	-1.29877	0.082	0.082	0.983834	1	0.541733	0.07	0.074	0.957827	1	1.1393	0.23	0.137	0.000516523	1	0.58223	0.077	0.06	0.274631	1	-0.157271	0.093	0.099	0.801173	1
Vars	0.677409	0.349	0.111	2.9474e-07	0.00876408	0.0346659	0.32	0.346	0.565503	1	-0.420806	0.28	0.296	0.826136	1	0.208183	0.353	0.338	0.956667	1	0.372866	0.308	0.28	0.138947	1	0.492509	0.371	0.276	0.00304017	1
Tsc22d4	0.272187	0.603	0.296	2.96588e-07	0.00881904	-0.620659	0.426	0.484	0.100717	1	0.506768	0.522	0.509	0.700669	1	0.522463	0.58	0.5	0.0120446	1	0.286801	0.334	0.376	0.484731	1	-0.348423	0.409	0.425	0.592218	1
Prdm4	0.373708	0.349	0.111	2.97228e-07	0.00883806	-0.316906	0.082	0.138	0.115381	1	-0.101405	0.178	0.176	0.927774	1	0.347158	0.368	0.226	6.31647e-05	1	0.182592	0.066	0.115	0.00633033	1	0.226366	0.139	0.177	0.190368	1
Lgmn	0.26485	0.829	0.619	2.98153e-07	0.00886558	0.10507	0.574	0.72	0.0973842	1	-0.00191728	0.739	0.759	0.378527	1	0.237724	0.755	0.697	0.00342409	1	0.0283546	0.593	0.576	0.424628	1	0.433521	0.727	0.745	0.0391034	1
AU040320	0.48605	0.438	0.164	2.98962e-07	0.00888964	0.158763	0.221	0.327	0.0646785	1	0.392717	0.408	0.324	0.207569	1	1.00808	0.502	0.341	1.19185e-06	0.0354397	0.0215874	0.216	0.285	0.0190008	1	-0.262871	0.328	0.333	0.651871	1
Pbxip1	0.0413257	0.541	0.259	3.0641e-07	0.0091111	0.148188	0.361	0.421	0.403213	1	0.681648	0.497	0.481	0.64327	1	0.648205	0.558	0.44	0.0025971	1	-0.115186	0.255	0.363	0.000423019	1	-0.377738	0.505	0.565	0.173068	1
Rpl21	0.400966	0.959	0.788	3.07622e-07	0.00914714	-0.186861	0.926	0.972	0.00626367	1	-0.50517	0.86	0.963	2.16862e-10	6.44838e-06	-0.336084	0.941	0.907	0.00301929	1	-0.424446	0.831	0.921	2.85481e-13	8.48879e-09	-0.2862	0.868	0.952	1.20737e-07	0.00359012
Map4k2	0.20144	0.753	0.418	3.12668e-07	0.00929718	0.140723	0.566	0.579	0.928812	1	-0.484065	0.535	0.769	0.000241515	1	0.149727	0.703	0.637	0.192676	1	0.115664	0.456	0.495	0.588568	1	0.0152332	0.574	0.656	0.063049	1
Dnttip1	1.53687	0.26	0.058	3.16377e-07	0.00940747	0.159144	0.148	0.176	0.4896	1	0.182857	0.121	0.185	0.17745	1	-0.0901628	0.268	0.257	0.923124	1	-0.213399	0.071	0.115	0.0166553	1	-0.276434	0.163	0.184	0.451558	1
Spata6	0.253463	0.582	0.27	3.17299e-07	0.00943489	0.384448	0.434	0.418	0.481689	1	0.0156783	0.541	0.565	0.602494	1	-0.0321777	0.599	0.531	0.115701	1	0.288783	0.285	0.332	0.290548	1	-0.0466132	0.541	0.517	0.735486	1
Smyd5	0.286608	0.274	0.063	3.25468e-07	0.00967779	-2.19117	0.066	0.113	0.123465	1	0.380647	0.153	0.065	0.0369144	1	0.112794	0.26	0.239	0.511007	1	0.0904044	0.084	0.146	0.00183465	1	0.38087	0.22	0.133	0.00174776	1
Papss1	0.401724	0.788	0.587	3.26392e-07	0.00970527	0.347732	0.664	0.632	0.233586	1	0.558881	0.682	0.565	0.0112476	1	0.340498	0.747	0.659	0.0328895	1	0.077746	0.583	0.586	0.774084	1	0.122935	0.737	0.626	0.00529886	1
Exoc3l	0.335698	0.705	0.46	3.26653e-07	0.00971303	0.107732	0.557	0.686	0.0518363	1	0.613483	0.643	0.593	0.231542	1	0.337502	0.721	0.686	0.0465509	1	-0.24175	0.555	0.686	6.23938e-06	0.185528	0.19836	0.722	0.684	0.112453	1
Casp7	1.06673	0.432	0.175	3.27177e-07	0.0097286	0.32384	0.246	0.358	0.0306563	1	0.00770421	0.261	0.324	0.285678	1	0.197209	0.483	0.487	0.640333	1	-0.438311	0.227	0.347	1.15148e-05	0.342393	-0.190515	0.278	0.293	0.827788	1
R3hdm4	0.643355	0.603	0.312	3.30725e-07	0.0098341	-0.335729	0.434	0.513	0.0869938	1	0.257559	0.478	0.509	0.712441	1	0.0106781	0.617	0.602	0.922666	1	0.00198006	0.351	0.476	8.88529e-05	1	-0.0998585	0.443	0.524	0.039526	1
Cyp26b1	0.686285	0.753	0.46	3.33063e-07	0.00990362	-0.102573	0.5	0.67	0.046922	1	-1.06999	0.567	0.898	2.37853e-12	7.07257e-08	0.773447	0.688	0.597	0.0140697	1	-0.853413	0.24	0.448	1.18476e-12	3.52289e-08	-0.865344	0.433	0.772	2.42841e-20	7.22088e-16
Slc35f6	0.127689	0.616	0.317	3.34098e-07	0.0099344	-0.248371	0.344	0.469	0.0258023	1	0.550494	0.529	0.491	0.597453	1	0.720249	0.561	0.502	0.114095	1	0.262068	0.415	0.426	0.915334	1	-0.309858	0.447	0.476	0.541576	1
2900052L18Rik	1.11812	0.26	0.058	3.35525e-07	0.00997683	-0.0175046	0.082	0.126	0.224901	1	-1.46961	0.07	0.278	3.60421e-06	0.107171	0.556446	0.286	0.221	0.0281847	1	-0.0891843	0.105	0.124	0.351217	1	-0.019775	0.179	0.241	0.0509365	1
Nup85	0.419866	0.493	0.222	3.36131e-07	0.00999485	-0.211527	0.377	0.44	0.254209	1	0.285123	0.433	0.407	0.509386	1	-0.258545	0.446	0.535	0.0204781	1	0.230336	0.33	0.371	0.293752	1	0.40112	0.514	0.391	0.0014376	1
Rnf166	0.409939	0.322	0.09	3.36143e-07	0.00999521	-0.58154	0.156	0.208	0.168681	1	-0.422585	0.255	0.38	0.0394154	1	0.0945866	0.331	0.325	0.683887	1	-0.317352	0.122	0.229	3.59861e-06	0.107005	-0.576819	0.206	0.235	0.363311	1
Foxo3	0.226115	0.411	0.153	3.38466e-07	0.0100643	0.279023	0.205	0.22	0.662137	1	-0.214072	0.433	0.454	0.452004	1	0.321603	0.383	0.361	0.481452	1	-0.0802588	0.143	0.175	0.138327	1	-0.499217	0.356	0.469	0.000299924	1
Mir5107	-1.19839	0.068	0.275	3.45704e-07	0.0102795	0.065188	0.254	0.289	0.508607	1	0.0522777	0.248	0.306	0.321128	1	-0.925302	0.327	0.604	1.36551e-12	4.06034e-08	-0.0619613	0.664	0.634	0.663993	1	0.129628	0.73	0.65	0.010769	1
Slk	0.114872	0.589	0.286	3.46678e-07	0.0103085	-0.211287	0.311	0.343	0.385699	1	-0.164646	0.395	0.556	0.00976135	1	-0.0550783	0.535	0.498	0.254195	1	-0.18853	0.218	0.299	0.00460834	1	-0.15631	0.364	0.439	0.0113293	1
Suclg2	0.449751	0.541	0.27	3.4759e-07	0.0103356	-0.158526	0.311	0.447	0.0227681	1	0.815346	0.503	0.333	0.00367067	1	0.435786	0.528	0.48	0.0666504	1	0.00545805	0.285	0.342	0.0619608	1	0.0868654	0.371	0.344	0.480219	1
1110007C09Rik	0.506584	0.671	0.376	3.61708e-07	0.0107554	-0.272656	0.459	0.601	0.0128519	1	-0.592546	0.478	0.611	0.0120942	1	-0.163468	0.625	0.631	0.502863	1	-0.311633	0.345	0.479	2.04257e-05	0.607358	-0.407439	0.543	0.633	0.0291422	1
Mon1b	1.13521	0.329	0.101	3.64168e-07	0.0108285	0.305558	0.18	0.138	0.249861	1	-0.705903	0.115	0.241	0.00531184	1	0.313336	0.219	0.19	0.461781	1	-0.115067	0.126	0.165	0.0878397	1	-0.2167	0.203	0.17	0.316436	1
Skiv2l	0.671594	0.514	0.249	3.65478e-07	0.0108675	-0.439571	0.279	0.381	0.0472709	1	0.629586	0.363	0.417	0.509175	1	0.437565	0.569	0.485	0.0117784	1	-0.288187	0.296	0.373	0.0143386	1	-0.684831	0.347	0.432	0.0179868	1
Wdr36	0.981873	0.445	0.18	3.66612e-07	0.0109012	-0.964581	0.23	0.311	0.0644232	1	0.503172	0.325	0.213	0.0766504	1	0.801642	0.368	0.279	0.0120084	1	0.125741	0.163	0.213	0.051941	1	0.621793	0.333	0.197	0.000229144	1
Golga2	0.390263	0.418	0.148	3.6706e-07	0.0109145	1.06357	0.336	0.264	0.0957766	1	1.14214	0.331	0.259	0.153067	1	0.279403	0.446	0.292	7.02991e-05	1	-0.201135	0.178	0.22	0.0961138	1	0.180587	0.321	0.313	0.721477	1
Pgm1	0.926064	0.575	0.323	3.67507e-07	0.0109278	0.132082	0.328	0.396	0.328813	1	0.209296	0.497	0.398	0.194372	1	-0.14142	0.528	0.535	0.875515	1	-0.373509	0.244	0.349	0.000512151	1	0.182407	0.438	0.405	0.394632	1
Klf3	0.317632	0.884	0.635	3.71473e-07	0.0110458	-0.261652	0.557	0.748	0.00730701	1	-0.469005	0.758	0.87	0.00781797	1	0.250925	0.833	0.77	0.0095229	1	-0.282095	0.452	0.581	0.000247368	1	-0.41932	0.778	0.844	0.000173446	1
Prmt6	1.42297	0.253	0.063	3.75398e-07	0.0111625	0.972853	0.172	0.129	0.217906	1	-0.971072	0.191	0.139	0.420541	1	0.0742448	0.271	0.274	0.694965	1	-0.88614	0.045	0.112	4.32059e-05	1	0.375389	0.199	0.119	0.00515188	1
Ubap1	0.126009	0.452	0.19	3.77009e-07	0.0112104	0.296867	0.254	0.321	0.253272	1	-0.0964445	0.446	0.5	0.45674	1	0.221339	0.398	0.376	0.52107	1	0.16966	0.276	0.308	0.333658	1	0.338341	0.443	0.401	0.323143	1
Tmem132a	0.415794	0.432	0.164	3.89583e-07	0.0115842	-0.0501407	0.27	0.381	0.028821	1	0.765221	0.312	0.241	0.141357	1	-0.135975	0.301	0.308	0.641194	1	-0.239225	0.197	0.284	0.00210393	1	-0.160968	0.222	0.299	0.0254022	1
Prkd3	0.660653	0.692	0.407	3.91385e-07	0.0116378	-0.274232	0.393	0.453	0.16017	1	-0.208512	0.484	0.63	0.0201966	1	-0.237233	0.665	0.631	0.124798	1	0.13443	0.371	0.402	0.335199	1	-0.329193	0.55	0.65	0.00936549	1
Zranb2	0.399724	0.514	0.233	3.91505e-07	0.0116414	-0.167138	0.295	0.355	0.15101	1	-0.38646	0.497	0.528	0.303844	1	0.502315	0.509	0.48	0.397659	1	-0.198992	0.221	0.338	4.57584e-05	1	-0.183751	0.457	0.48	0.311575	1
Crybg3	0.685256	0.623	0.307	3.93235e-07	0.0116929	0.25804	0.246	0.283	0.392748	1	0.117961	0.395	0.472	0.233425	1	0.115576	0.546	0.478	0.0960885	1	0.160762	0.285	0.309	0.501694	1	0.15597	0.426	0.34	0.0316599	1
Sept8	0.196438	0.425	0.164	4.10403e-07	0.0122033	0.41838	0.205	0.208	0.914724	1	0.204409	0.229	0.25	0.621382	1	0.71254	0.428	0.261	5.60918e-07	0.0166789	0.0234209	0.18	0.17	0.62181	1	0.113137	0.266	0.245	0.398966	1
Exoc8	0.765837	0.733	0.46	4.12016e-07	0.0122513	-1.34902	0.459	0.56	0.152465	1	0.602589	0.389	0.38	0.579591	1	0.278689	0.836	0.405	1.36247e-31	4.05131e-27	-0.105568	0.565	0.589	0.297427	1	-0.0253619	0.28	0.32	0.326891	1
Aqp1	0.633905	0.966	0.931	4.12727e-07	0.0122724	-0.0766951	0.795	0.928	0.0139735	1	0.4672	0.936	0.907	0.00209691	1	-0.299553	0.911	0.947	0.347515	1	-0.324089	0.689	0.878	3.94009e-20	1.17159e-15	0.797421	0.866	0.806	1.23556e-08	0.000367394
Mcf2l	0.189134	0.685	0.376	4.14401e-07	0.0123222	0.310081	0.557	0.44	0.0230135	1	-0.612536	0.548	0.713	0.00103626	1	0.710764	0.781	0.604	8.0997e-12	2.40845e-07	0.544692	0.441	0.375	0.00730028	1	-0.289006	0.584	0.697	0.00329081	1
Asah1	0.183791	0.918	0.698	4.1611e-07	0.012373	0.110513	0.664	0.73	0.776741	1	0.197492	0.866	0.824	0.440577	1	-0.069039	0.855	0.816	0.287807	1	-0.0903371	0.619	0.71	0.0106364	1	0.13751	0.854	0.881	0.865246	1
Zfp420	1.19996	0.205	0.032	4.21478e-07	0.0125327	-1.44901	0.057	0.053	0.879901	1	-0.120674	0.064	0.056	0.811068	1	-0.645075	0.171	0.162	0.905762	1	-0.393615	0.043	0.04	0.778114	1	-0.216354	0.038	0.044	0.684119	1
Usp22	-0.0119942	0.863	0.545	4.22321e-07	0.0125577	-0.0227483	0.508	0.682	0.00448098	1	0.268303	0.796	0.843	0.581896	1	0.0864061	0.862	0.67	0.000146967	1	-0.00368711	0.471	0.512	0.151135	1	-0.0494829	0.711	0.867	0.0370021	1
Tmem243	0.563511	0.582	0.302	4.23255e-07	0.0125855	-0.649507	0.336	0.475	0.00904697	1	-0.396713	0.363	0.389	0.629976	1	-0.0487402	0.543	0.354	1.13055e-06	0.0336169	-0.403764	0.287	0.366	0.00210365	1	0.309446	0.301	0.347	0.327669	1
Mapre2	0.321934	0.822	0.534	4.23623e-07	0.0125964	0.0483828	0.631	0.701	0.208923	1	0.218313	0.783	0.759	0.517473	1	0.223262	0.77	0.699	0.0399822	1	-0.193104	0.527	0.603	0.0168193	1	0.0862189	0.72	0.721	0.818435	1
Sel1l	0.384602	0.692	0.407	4.2482e-07	0.012632	0.159579	0.492	0.516	0.763401	1	-0.388169	0.599	0.704	0.000963918	1	0.0873859	0.639	0.613	0.088411	1	0.0649534	0.411	0.414	0.603118	1	-0.0212504	0.61	0.633	0.288061	1
Ap3m2	0.313406	0.438	0.169	4.28683e-07	0.0127469	0.410382	0.238	0.211	0.463863	1	0.462778	0.427	0.333	0.112561	1	0.412562	0.435	0.334	0.00421079	1	0.187627	0.154	0.196	0.0890712	1	-0.157574	0.368	0.293	0.0486273	1
Rps21	0.516309	0.945	0.693	4.32458e-07	0.0128592	-0.155384	0.893	0.95	0.0472703	1	-0.785963	0.822	0.88	2.1214e-06	0.0630798	0.0166571	0.926	0.825	0.681263	1	-0.427647	0.818	0.959	1.31357e-16	3.90589e-12	-0.56566	0.725	0.867	3.90447e-10	1.16099e-05
Tram2	-0.0617608	0.404	0.143	4.32497e-07	0.0128603	0.793887	0.18	0.132	0.173926	1	-0.637571	0.242	0.444	0.00041413	1	-0.0375631	0.335	0.323	0.797949	1	-0.0284434	0.126	0.167	0.0717008	1	-0.341211	0.278	0.344	0.0615463	1
Prss23	1.1907	0.5	0.265	4.3398e-07	0.0129044	0.442995	0.246	0.352	0.0373926	1	-0.650822	0.459	0.333	0.0572352	1	-0.592383	0.509	0.562	0.0814788	1	0.150996	0.223	0.318	0.00122251	1	0.0739355	0.522	0.456	0.0187942	1
Pcdha4.1	0.596893	0.466	0.19	4.34475e-07	0.0129191	0.00195376	0.328	0.305	0.57773	1	0.217789	0.376	0.463	0.349716	1	0.63805	0.401	0.272	6.97826e-05	1	0.0095285	0.216	0.278	0.0460216	1	0.00223061	0.27	0.344	0.0512153	1
Pear1	0.139226	0.733	0.423	4.36983e-07	0.0129937	0.400219	0.68	0.553	0.014963	1	-0.487214	0.624	0.704	0.0338141	1	0.286348	0.781	0.708	0.118273	1	0.2676	0.615	0.632	0.443692	1	0.145284	0.694	0.65	0.96711	1
Pou1f1	0.325341	0.322	0.101	4.38321e-07	0.0130335	-0.0189088	0.148	0.164	0.713135	1	-0.170262	0.21	0.417	0.000142053	1	0.219982	0.327	0.142	1.86882e-08	0.000555692	-0.0349615	0.088	0.131	0.0288672	1	-0.445224	0.17	0.374	6.397e-10	1.90215e-05
Pla2g16	0.291258	0.822	0.519	4.38726e-07	0.0130455	-0.438075	0.68	0.755	0.0195113	1	0.423896	0.752	0.722	0.127731	1	-0.061965	0.773	0.712	0.193832	1	-0.0868723	0.644	0.643	0.882665	1	-0.410089	0.636	0.714	0.000606682	1
Tceb3	0.192932	0.582	0.28	4.40215e-07	0.0130898	-1.26053	0.238	0.412	0.000171985	1	-0.381914	0.439	0.583	0.00581158	1	-0.123283	0.55	0.542	0.44065	1	-0.0621243	0.248	0.361	0.000111208	1	-0.179017	0.51	0.575	0.0827955	1
Tacc1	0.58296	0.644	0.392	4.42903e-07	0.0131697	0.196047	0.434	0.478	0.465399	1	-0.761158	0.567	0.88	2.41095e-08	0.000716896	-0.0456624	0.613	0.606	0.0893361	1	-0.395683	0.265	0.338	0.00358452	1	-0.139905	0.634	0.735	0.0827443	1
Hmgn3	0.455627	0.438	0.18	4.4514e-07	0.0132362	-0.0292482	0.23	0.336	0.0490151	1	-0.442049	0.331	0.426	0.0764422	1	-0.0545671	0.487	0.447	0.5449	1	-0.439897	0.246	0.354	5.03049e-05	1	-0.237442	0.419	0.459	0.180368	1
Ccdc85a	0.215445	0.418	0.159	4.45654e-07	0.0132515	0.553414	0.27	0.179	0.0323389	1	-1.66912	0.293	0.333	0.448541	1	0.192559	0.532	0.405	0.0013687	1	0.508458	0.313	0.223	0.000325109	1	-0.189982	0.467	0.541	0.0289838	1
Smarca2	0.379998	0.692	0.413	4.49774e-07	0.013374	0.151487	0.467	0.535	0.407875	1	-0.127975	0.561	0.648	0.0354122	1	0.319551	0.662	0.6	0.118091	1	-0.475117	0.315	0.485	3.28629e-08	0.000977179	-0.394945	0.615	0.612	0.667326	1
St8sia6	2.16512	0.479	0.238	4.53175e-07	0.0134752	0.143914	0.279	0.311	0.643177	1	-0.702659	0.408	0.37	0.693923	1	-0.454806	0.502	0.524	0.524578	1	0.0137552	0.27	0.285	0.785759	1	-0.192197	0.495	0.483	0.557965	1
Qser1	1.78226	0.295	0.085	4.53946e-07	0.0134981	-0.351274	0.115	0.123	0.804025	1	-0.962612	0.115	0.222	0.0145236	1	0.29917	0.257	0.19	0.0294459	1	0.402898	0.103	0.124	0.38247	1	-0.68003	0.129	0.16	0.213912	1
Tfip11	0.51957	0.425	0.159	4.55459e-07	0.0135431	-0.0867635	0.352	0.327	0.752949	1	-0.604228	0.414	0.481	0.143257	1	0.331116	0.483	0.451	0.781888	1	-0.0909729	0.276	0.364	0.00554754	1	0.598861	0.397	0.323	0.0173664	1
1810030O07Rik	0.583076	0.562	0.296	4.61249e-07	0.0137152	-0.297818	0.369	0.447	0.142857	1	0.221622	0.51	0.352	0.014028	1	-0.0737144	0.528	0.524	0.495094	1	0.213683	0.287	0.352	0.0538306	1	0.443415	0.443	0.361	0.0145846	1
Gm15800	0.260868	0.507	0.228	4.62756e-07	0.01376	-0.117481	0.328	0.314	0.722458	1	0.0883247	0.35	0.389	0.490996	1	0.502034	0.48	0.403	0.0439477	1	0.296253	0.235	0.287	0.108979	1	-0.404472	0.366	0.388	0.493549	1
B4galt1	0.425421	0.705	0.423	4.63094e-07	0.0137701	-0.297464	0.467	0.5	0.412341	1	-0.457413	0.611	0.852	4.97219e-05	1	0.106261	0.699	0.668	0.695662	1	-0.0960819	0.364	0.462	0.00298936	1	-0.526512	0.634	0.806	2.35479e-07	0.00700196
Mrps24	0.441034	0.705	0.392	4.69381e-07	0.013957	-0.0365645	0.582	0.591	0.962258	1	-0.331266	0.618	0.676	0.205251	1	-0.164689	0.662	0.675	0.0808597	1	-0.196227	0.448	0.567	0.00160223	1	-0.326251	0.658	0.711	0.102598	1
Ppp4r1l-ps	0.582363	0.356	0.116	4.72442e-07	0.0140481	0.395313	0.164	0.255	0.083673	1	-0.839431	0.217	0.417	0.000240404	1	1.25007	0.338	0.142	5.44764e-10	1.61986e-05	-0.155286	0.178	0.206	0.264052	1	-0.256882	0.246	0.313	0.0367521	1
0610039K10Rik	0.321993	0.973	0.889	4.75925e-07	0.0141516	0.747711	0.885	0.777	1.45941e-15	4.33956e-11	-0.828367	0.815	0.944	3.25752e-17	9.68622e-13	0.17354	0.907	0.83	6.7277e-05	1	0.894458	0.872	0.658	1.31799e-44	3.91903e-40	-0.487332	0.818	0.878	1.41319e-13	4.20211e-09
Tmem260	0.527585	0.342	0.106	4.7623e-07	0.0141607	0.899996	0.205	0.138	0.0677284	1	0.222001	0.236	0.259	0.733676	1	0.23961	0.364	0.292	0.0906356	1	0.417342	0.173	0.131	0.0342135	1	-0.0553946	0.242	0.238	0.975766	1
Zfp451	0.794895	0.514	0.238	4.82718e-07	0.0143536	-0.635324	0.254	0.302	0.208094	1	-0.112273	0.261	0.333	0.251676	1	-0.318465	0.442	0.412	0.772612	1	-0.0517971	0.203	0.27	0.00865435	1	-0.573146	0.232	0.279	0.15476	1
Zmat2	0.74583	0.644	0.37	4.85334e-07	0.0144314	0.0967902	0.574	0.525	0.269337	1	-0.893649	0.611	0.75	0.00013957	1	0.157354	0.688	0.58	0.0163134	1	0.0457389	0.456	0.454	0.975742	1	-0.6199	0.483	0.731	1.24509e-09	3.70227e-05
Por	0.121472	0.781	0.45	4.85615e-07	0.0144398	0.0443719	0.648	0.676	0.340568	1	0.106486	0.637	0.602	0.997324	1	0.0340743	0.725	0.653	0.0648724	1	-0.0519985	0.546	0.668	0.00254442	1	-0.037976	0.627	0.599	0.951532	1
Ptpra	0.256255	0.651	0.328	4.88142e-07	0.0145149	-0.140823	0.434	0.601	0.00444682	1	-0.666741	0.631	0.713	0.00896756	1	0.121253	0.654	0.608	0.550444	1	-0.135214	0.353	0.505	7.68848e-06	0.228617	0.00734007	0.562	0.619	0.107269	1
Mbnl1	0.283133	0.815	0.561	4.93092e-07	0.0146621	0.67479	0.615	0.579	0.0502921	1	-0.45862	0.675	0.815	0.000232949	1	0.248794	0.803	0.712	0.00112519	1	0.0907703	0.441	0.467	0.786995	1	-0.321651	0.632	0.776	8.22728e-06	0.244638
Btd	0.360211	0.575	0.254	4.97261e-07	0.014786	-0.326428	0.32	0.393	0.205831	1	0.327049	0.439	0.454	0.882525	1	0.434975	0.48	0.511	0.287447	1	-0.0530279	0.313	0.4	0.00575354	1	0.356861	0.486	0.391	0.0108187	1
Atg9a	0.301688	0.514	0.233	5.13545e-07	0.0152703	0.741334	0.475	0.34	0.00305432	1	-0.358157	0.344	0.528	0.00402151	1	0.366837	0.509	0.429	0.0765743	1	0.377138	0.345	0.345	0.948892	1	-0.580476	0.359	0.456	0.00722316	1
Emp3	0.0795048	0.616	0.302	5.20699e-07	0.015483	0.22605	0.426	0.494	0.417405	1	-0.46728	0.465	0.611	0.0245227	1	-0.235269	0.68	0.675	0.48383	1	-0.105582	0.454	0.459	0.617443	1	-0.249779	0.543	0.65	0.0430172	1
Tnrc6c	0.184104	0.5	0.228	5.21395e-07	0.0155037	-0.771111	0.221	0.258	0.384139	1	-0.178045	0.331	0.519	0.0020197	1	0.285456	0.472	0.423	0.0676931	1	-0.415362	0.143	0.174	0.172778	1	-0.426679	0.333	0.459	8.26933e-05	1
Hras	0.736489	0.459	0.196	5.24524e-07	0.0155967	-0.239942	0.303	0.374	0.106492	1	0.308462	0.369	0.389	0.941032	1	0.203496	0.424	0.467	0.287629	1	-0.288629	0.287	0.397	0.000141233	1	-0.28372	0.266	0.398	0.00137699	1
Ift20	-0.186941	0.74	0.418	5.28134e-07	0.0157041	-0.432928	0.443	0.528	0.113424	1	-0.451723	0.503	0.574	0.17027	1	-0.0473745	0.647	0.646	0.407438	1	-0.765597	0.317	0.497	7.55609e-10	2.2468e-05	-0.17889	0.6	0.629	0.988742	1
Dusp26	-0.328776	0.486	0.206	5.29516e-07	0.0157452	-0.726067	0.123	0.44	2.13846e-09	6.35872e-05	0.416625	0.35	0.259	0.0938725	1	-0.285559	0.468	0.465	0.745745	1	-0.689133	0.154	0.363	1.46594e-14	4.35897e-10	1.11157	0.411	0.224	3.25213e-09	9.6702e-05
Psmd14	0.0810233	0.678	0.36	5.29721e-07	0.0157512	-0.396632	0.303	0.481	0.00320686	1	-0.0401382	0.554	0.62	0.338774	1	0.352514	0.639	0.553	0.0319967	1	-0.084238	0.298	0.375	0.016863	1	-0.104794	0.579	0.49	0.0518527	1
Gm20518	0.396753	0.705	0.418	5.35098e-07	0.0159111	0.310118	0.598	0.597	0.640913	1	-0.172419	0.535	0.648	0.0345163	1	0.0541135	0.703	0.617	0.0910026	1	0.356028	0.568	0.54	0.171206	1	0.00173158	0.569	0.561	0.789728	1
Rexo1	0.673797	0.473	0.212	5.36224e-07	0.0159446	0.0798224	0.295	0.327	0.511736	1	-0.00498214	0.395	0.463	0.348498	1	0.0485523	0.405	0.343	0.0684573	1	0.154841	0.176	0.254	0.0051049	1	0.110823	0.421	0.35	0.0423062	1
Cd99l2	0.353238	0.438	0.175	5.37919e-07	0.015995	0.42649	0.32	0.327	0.921033	1	0.374424	0.344	0.269	0.204217	1	-1.12247	0.335	0.42	0.00830103	1	-0.43902	0.206	0.232	0.341072	1	0.484068	0.433	0.255	5.69533e-06	0.169351
Efnb1	0.104597	0.74	0.397	5.39425e-07	0.0160398	-0.0955161	0.516	0.579	0.410419	1	-0.514188	0.586	0.741	0.0065488	1	0.381316	0.725	0.648	0.00211563	1	0.152201	0.552	0.569	0.54048	1	-0.555268	0.603	0.745	3.26493e-08	0.000970828
Gpr137b	0.480316	0.589	0.291	5.46397e-07	0.0162471	-0.189318	0.377	0.484	0.0843153	1	-0.0375457	0.503	0.62	0.0905616	1	0.269142	0.632	0.538	0.0400345	1	0.258853	0.392	0.416	0.58768	1	-0.354491	0.493	0.599	0.00113204	1
Tug1	0.684027	0.603	0.323	5.46858e-07	0.0162608	-0.062804	0.262	0.299	0.413896	1	-0.328467	0.427	0.648	0.00022805	1	0.510707	0.576	0.485	0.00130658	1	0.163968	0.173	0.266	0.000326568	1	-0.458655	0.474	0.554	0.0264604	1
Parva	0.688276	0.644	0.407	5.47304e-07	0.0162741	-0.164601	0.41	0.535	0.0182511	1	0.489736	0.618	0.519	0.134371	1	0.238869	0.703	0.65	0.368035	1	-0.199476	0.371	0.448	0.0122941	1	-0.176012	0.56	0.52	0.127306	1
Cln3	0.598781	0.459	0.201	5.71293e-07	0.0169874	-0.250756	0.262	0.324	0.208841	1	-0.0365755	0.293	0.37	0.230452	1	0.185724	0.394	0.396	0.84063	1	-0.0247619	0.278	0.306	0.277538	1	0.163288	0.318	0.316	0.9664	1
Atxn1l	0.34637	0.329	0.106	5.71452e-07	0.0169921	0.830474	0.148	0.151	0.977951	1	-0.234343	0.172	0.185	0.752907	1	0.626274	0.338	0.155	9.67959e-09	0.000287822	-0.291396	0.113	0.105	0.726594	1	0.391356	0.179	0.163	0.586744	1
Ly75	1.12666	0.226	0.042	5.72741e-07	0.0170304	0.0174238	0.082	0.101	0.572557	1	-1.33021	0.108	0.139	0.470303	1	0.154229	0.245	0.162	0.00491929	1	0.763661	0.12	0.1	0.225264	1	0.175779	0.165	0.18	0.58375	1
Alkbh6	0.887656	0.5	0.228	5.74776e-07	0.017091	-0.0227309	0.27	0.409	0.0153478	1	-0.495675	0.439	0.546	0.143064	1	-0.701013	0.461	0.511	0.0478742	1	-0.348714	0.278	0.402	9.23098e-06	0.274483	-0.106577	0.478	0.48	0.735294	1
Abhd12	0.504869	0.527	0.259	5.80402e-07	0.0172583	0.0111309	0.279	0.403	0.0151631	1	-0.091183	0.452	0.472	0.652432	1	0.400032	0.539	0.493	0.478352	1	-0.0700888	0.229	0.359	1.59509e-05	0.4743	0.359635	0.431	0.367	0.094626	1
Trip4	0.914778	0.61	0.344	5.80792e-07	0.0172698	0.0881649	0.402	0.403	0.731388	1	-0.651651	0.382	0.417	0.196685	1	0.305022	0.636	0.476	0.00058322	1	-0.428142	0.291	0.416	5.36127e-05	1	0.214856	0.409	0.483	0.0361119	1
Ogt	0.502658	0.692	0.418	5.84611e-07	0.0173834	-0.0327192	0.393	0.547	0.0171007	1	-0.516869	0.51	0.574	0.0758601	1	0.110377	0.703	0.648	0.0953202	1	0.018235	0.394	0.428	0.398249	1	0.167635	0.507	0.52	0.841387	1
Mageh1	0.922482	0.288	0.079	5.865e-07	0.0174396	0.000385642	0.164	0.214	0.346345	1	-1.14336	0.229	0.343	0.0257763	1	0.544958	0.257	0.239	0.643487	1	-0.294394	0.124	0.215	9.04427e-05	1	-0.338793	0.256	0.313	0.136101	1
BC037039	1.01005	0.253	0.058	5.91362e-07	0.0175841	0.28454	0.254	0.154	0.017799	1	0.269022	0.217	0.204	0.820122	1	0.887558	0.182	0.119	0.0171284	1	0.0345038	0.143	0.134	0.669633	1	-0.0768141	0.199	0.153	0.221836	1
Mpdu1	0.45196	0.589	0.291	5.9515e-07	0.0176968	0.0215336	0.443	0.459	0.622199	1	-0.467118	0.503	0.565	0.0659508	1	-0.122011	0.554	0.569	0.663683	1	-0.170415	0.308	0.442	3.40231e-05	1	-0.0711584	0.51	0.537	0.816225	1
Adamts10	0.137794	0.445	0.169	6.03009e-07	0.0179305	0.154282	0.311	0.296	0.725754	1	-0.544369	0.287	0.407	0.0574253	1	-0.112215	0.524	0.478	0.704502	1	0.258183	0.235	0.271	0.249836	1	0.351011	0.342	0.337	0.714931	1
Rab34	0.198009	0.281	0.069	6.06126e-07	0.0180231	0.277903	0.23	0.176	0.225049	1	-0.793304	0.166	0.222	0.20407	1	0.119341	0.19	0.215	0.431812	1	0.248678	0.12	0.129	0.717054	1	-0.0055818	0.165	0.177	0.732846	1
Tns1	0.0997988	0.863	0.608	6.07282e-07	0.0180575	0.394169	0.689	0.692	0.16159	1	-0.451212	0.771	0.87	0.00151929	1	0.00488026	0.796	0.774	0.0869669	1	-0.0675118	0.548	0.651	0.00543483	1	-0.486044	0.718	0.816	0.000494212	1
Socs6	0.649419	0.404	0.153	6.11612e-07	0.0181863	-0.713819	0.189	0.223	0.326351	1	0.488273	0.338	0.38	0.607226	1	0.529289	0.383	0.265	0.000595542	1	-0.19965	0.152	0.187	0.11855	1	-0.155717	0.27	0.313	0.25291	1
Wipi1	0.443139	0.555	0.27	6.12069e-07	0.0181999	0.274213	0.377	0.327	0.346563	1	-0.731915	0.478	0.472	0.361498	1	0.450602	0.572	0.447	0.00148734	1	0.310398	0.321	0.289	0.175495	1	0.0380684	0.388	0.422	0.265631	1
1110038F14Rik	0.22818	0.719	0.407	6.13345e-07	0.0182378	0.108731	0.516	0.538	0.776572	1	-0.0324582	0.726	0.741	0.74247	1	0.1028	0.695	0.67	0.522618	1	-0.190721	0.49	0.474	0.774208	1	-0.105852	0.636	0.724	0.248454	1
Mall	0.242914	0.212	0.037	6.20325e-07	0.0184454	-0.0169475	0.033	0.044	0.602358	1	-0.0423438	0.057	0.074	0.550361	1	-0.360949	0.219	0.29	0.00785715	1	0.532989	0.023	0.038	0.150444	1	-0.393379	0.084	0.061	0.22862	1
Mtmr10	1.18315	0.308	0.095	6.31083e-07	0.0187652	0.103688	0.115	0.154	0.291282	1	-0.371063	0.191	0.306	0.0255197	1	0.886601	0.29	0.157	1.72597e-05	0.513216	0.0890825	0.126	0.119	0.746358	1	-0.709214	0.184	0.241	0.0657013	1
Nde1	0.209279	0.829	0.54	6.31403e-07	0.0187748	0.527389	0.648	0.679	0.472414	1	0.185079	0.707	0.722	0.55732	1	-0.151958	0.732	0.697	0.742	1	0.231161	0.477	0.5	0.652101	1	0.404342	0.694	0.656	0.0826841	1
Syp	0.707704	0.205	0.032	6.33582e-07	0.0188395	-1.24275	0.057	0.104	0.117538	1	0.427678	0.134	0.185	0.288519	1	-0.756186	0.208	0.093	1.21598e-05	0.361572	-0.147899	0.051	0.081	0.0473319	1	-0.660169	0.105	0.197	0.000719647	1
Tmtc1	1.11765	0.438	0.196	6.3371e-07	0.0188434	0.447009	0.311	0.22	0.0455149	1	-0.471625	0.338	0.444	0.0545477	1	-0.0233243	0.561	0.447	0.000756943	1	0.402845	0.411	0.296	1.65914e-05	0.493345	-0.400429	0.38	0.51	0.000237732	1
Pfn2	0.2034	0.233	0.048	6.39261e-07	0.0190084	-0.455669	0.082	0.142	0.0831883	1	0.17251	0.153	0.148	0.948841	1	-0.30002	0.164	0.106	0.0322405	1	0.0259394	0.084	0.101	0.366811	1	-0.62934	0.148	0.143	0.968042	1
Tars	0.184333	0.582	0.286	6.42514e-07	0.0191052	0.152893	0.344	0.447	0.135938	1	0.0877509	0.459	0.407	0.683691	1	0.355236	0.543	0.531	0.718287	1	-0.0447959	0.302	0.392	0.00530637	1	0.573446	0.488	0.408	0.0145534	1
Atp6ap2	0.193045	0.863	0.619	6.447e-07	0.0191701	-0.192828	0.541	0.714	0.002052	1	0.0820784	0.764	0.722	0.813447	1	-0.0307635	0.818	0.777	0.723103	1	0.0584979	0.535	0.639	0.0109028	1	0.0303057	0.749	0.803	0.319737	1
E130309D02Rik	0.0501467	0.473	0.201	6.46118e-07	0.0192123	0.222407	0.287	0.343	0.382314	1	0.32086	0.363	0.361	0.946355	1	0.535055	0.472	0.385	0.0193824	1	0.0858157	0.208	0.268	0.03964	1	0.621709	0.342	0.354	0.913781	1
Eif1ax	0.547832	0.589	0.312	6.50468e-07	0.0193417	0.111227	0.369	0.428	0.538981	1	-0.0303746	0.522	0.491	0.90048	1	0.0806963	0.565	0.524	0.351454	1	-0.14986	0.281	0.344	0.0682764	1	-0.085042	0.49	0.473	0.701968	1
Ptrh2	1.14432	0.308	0.095	6.53222e-07	0.0194236	0.683021	0.279	0.182	0.0195636	1	-0.249436	0.261	0.231	0.668239	1	-0.325594	0.238	0.27	0.309596	1	0.114434	0.146	0.153	0.862144	1	-0.194934	0.215	0.245	0.321097	1
Ssfa2	0.249844	0.568	0.312	6.53493e-07	0.0194316	-0.119136	0.32	0.374	0.225203	1	0.245583	0.446	0.491	0.219794	1	-0.26189	0.572	0.655	0.0152276	1	-0.066928	0.36	0.364	0.771993	1	-0.106758	0.443	0.52	0.0490431	1
Lpar4	-0.136916	0.301	0.09	6.53818e-07	0.0194413	-0.831459	0.09	0.148	0.0922154	1	-0.349864	0.14	0.222	0.0921284	1	0.383188	0.327	0.299	0.306873	1	-0.22139	0.105	0.153	0.0223534	1	-0.768182	0.254	0.282	0.16624	1
Thra	0.300672	0.795	0.46	6.54981e-07	0.0194759	0.0694546	0.615	0.623	0.625576	1	-0.564557	0.573	0.759	0.000635487	1	0.348124	0.717	0.549	4.90341e-07	0.0145803	-0.0343698	0.45	0.455	0.866771	1	-0.328647	0.517	0.616	0.000587949	1
Ankrd32	1.38566	0.226	0.042	6.55146e-07	0.0194808	1.2068	0.066	0.041	0.268078	1	-0.160904	0.089	0.157	0.0998868	1	0.58922	0.193	0.113	0.00546994	1	-1.21353	0.043	0.084	0.00448563	1	-0.992098	0.093	0.153	0.00990818	1
Apc	0.411197	0.438	0.19	6.62642e-07	0.0197037	-0.780751	0.107	0.277	0.000146691	1	-0.324095	0.268	0.37	0.0445744	1	0.247597	0.465	0.356	0.0093313	1	-0.805004	0.159	0.225	0.00540765	1	0.400479	0.311	0.265	0.226464	1
Fes	0.179964	0.719	0.46	6.64538e-07	0.01976	0.221493	0.557	0.629	0.687017	1	-0.155825	0.548	0.639	0.0743923	1	0.177291	0.71	0.628	0.0505014	1	0.108052	0.561	0.607	0.220955	1	0.2892	0.61	0.571	0.117815	1
Hyls1	1.10607	0.295	0.085	6.65615e-07	0.0197921	-0.0241973	0.139	0.211	0.0921888	1	0.593527	0.191	0.213	0.765037	1	-0.48592	0.271	0.248	0.803149	1	-0.553849	0.094	0.172	0.000143817	1	-0.0196488	0.167	0.163	0.880304	1
Klk8	0.379361	0.712	0.365	6.80835e-07	0.0202446	-0.252718	0.443	0.597	0.0199379	1	0.0632932	0.561	0.574	0.962665	1	-0.333086	0.561	0.619	0.00440332	1	0.104235	0.383	0.443	0.130605	1	-0.108799	0.55	0.588	0.475067	1
Cep68	0.300601	0.37	0.127	6.85133e-07	0.0203724	-0.200967	0.238	0.248	0.988499	1	0.825934	0.28	0.231	0.277239	1	0.440642	0.346	0.396	0.153081	1	0.0205916	0.174	0.241	0.00925672	1	-0.248504	0.294	0.207	0.0202705	1
Arap1	0.216753	0.438	0.18	7.0203e-07	0.0208749	-0.0406077	0.213	0.277	0.215759	1	1.10765	0.331	0.306	0.305091	1	-0.221791	0.364	0.416	0.0146786	1	1.07499	0.167	0.156	0.546542	1	-0.119778	0.266	0.248	0.831297	1
Tmem159	0.100356	0.479	0.196	7.0598e-07	0.0209923	0.532795	0.336	0.299	0.360419	1	0.0814193	0.42	0.417	0.934748	1	0.398777	0.457	0.46	0.594628	1	0.352078	0.287	0.261	0.241925	1	0.216202	0.419	0.378	0.244802	1
Slc30a9	-0.345754	0.945	0.73	7.06561e-07	0.0210096	-0.545879	0.762	0.774	0.385232	1	0.27946	0.904	0.926	0.957709	1	0.639997	0.911	0.836	2.18122e-07	0.00648587	-0.246725	0.668	0.742	0.0013252	1	0.251249	0.823	0.888	0.989796	1
Ubac2	0.468555	0.555	0.286	7.20175e-07	0.0214144	0.497317	0.467	0.415	0.177366	1	-0.371728	0.433	0.491	0.277518	1	-0.14017	0.558	0.569	0.391478	1	0.280254	0.379	0.375	0.404531	1	0.245816	0.529	0.507	0.462776	1
Csgalnact2	1.16863	0.438	0.185	7.28436e-07	0.02166	-0.355534	0.164	0.239	0.078609	1	0.36839	0.293	0.213	0.125903	1	0.220702	0.45	0.396	0.0640486	1	-0.359986	0.146	0.198	0.0228781	1	0.145244	0.34	0.238	0.00184798	1
Arhgap27	0.0744834	0.664	0.386	7.29854e-07	0.0217022	-0.334481	0.541	0.544	0.583613	1	1.03664	0.599	0.63	0.800249	1	0.446873	0.706	0.648	0.00660545	1	0.351496	0.591	0.531	0.00894293	1	-0.375884	0.567	0.68	0.000682689	1
Rcbtb1	0.413996	0.568	0.317	7.37921e-07	0.0219421	0.224812	0.287	0.365	0.171096	1	0.277119	0.465	0.444	0.952445	1	0.266807	0.52	0.456	0.0700247	1	-0.34099	0.225	0.297	0.00737701	1	-0.289929	0.435	0.469	0.378191	1
Sort1	0.601734	0.397	0.159	7.39201e-07	0.0219801	0.343366	0.27	0.186	0.0608581	1	0.278057	0.248	0.241	0.82981	1	0.116075	0.383	0.285	0.00995966	1	0.0816991	0.126	0.162	0.11093	1	-0.28792	0.201	0.245	0.143143	1
Ash2l	-0.271973	0.555	0.254	7.45883e-07	0.0221788	-0.36933	0.262	0.327	0.195454	1	0.143386	0.395	0.472	0.17846	1	0.0746676	0.558	0.44	0.00237161	1	-0.169049	0.246	0.27	0.428709	1	0.0603549	0.455	0.408	0.327797	1
Hdc	0.412095	0.459	0.185	7.57001e-07	0.0225094	0.858622	0.344	0.245	0.0153927	1	-0.144507	0.274	0.352	0.166701	1	-0.148663	0.327	0.221	0.00199412	1	-0.217952	0.105	0.158	0.0102345	1	-0.462157	0.179	0.214	0.313536	1
Gprc5b	0.57019	0.349	0.122	7.62512e-07	0.0226733	0.648277	0.197	0.201	0.901251	1	-0.103038	0.268	0.352	0.143489	1	0.258192	0.327	0.292	0.561388	1	0.0815274	0.122	0.129	0.692314	1	-0.417991	0.191	0.214	0.611091	1
Lfng	0.43785	0.678	0.381	7.64741e-07	0.0227396	0.482372	0.451	0.352	0.0446742	1	-0.830421	0.401	0.593	0.00128116	1	0.668108	0.677	0.449	1.55339e-11	4.619e-07	1.04705	0.49	0.297	1.11328e-13	3.31034e-09	-0.838786	0.426	0.575	2.88034e-07	0.00856469
Itga5	0.289118	0.808	0.614	7.66694e-07	0.0227976	0.029309	0.68	0.701	0.751327	1	0.166531	0.809	0.657	0.118812	1	0.219199	0.848	0.783	0.110551	1	0.270125	0.702	0.741	0.406633	1	0.311201	0.792	0.765	0.0552278	1
Apoe	0.310031	0.856	0.651	7.74554e-07	0.0230314	-0.436758	0.77	0.881	0.0104194	1	0.69715	0.854	0.759	0.00081672	1	-0.000989785	0.914	0.896	0.453392	1	0.0383257	0.857	0.904	0.165277	1	0.527567	0.923	0.854	3.66524e-10	1.08986e-05
Drap1	0.507416	0.5	0.222	7.82586e-07	0.0232702	0.47155	0.508	0.371	0.00173725	1	-1.13205	0.389	0.75	4.17718e-10	1.24208e-05	-0.0621022	0.353	0.372	0.805445	1	-0.109473	0.225	0.235	0.612889	1	-0.707586	0.402	0.571	6.22168e-06	0.185002
Tmx1	0.318815	0.795	0.529	7.96801e-07	0.0236929	-0.291921	0.443	0.525	0.0479219	1	-0.0783976	0.72	0.602	0.436527	1	-0.0973201	0.706	0.746	0.133072	1	-0.115984	0.375	0.509	5.88438e-05	1	0.479045	0.696	0.595	0.000358938	1
Usp12	0.816926	0.342	0.111	8.023e-07	0.0238564	0.333567	0.213	0.201	0.807073	1	0.140218	0.255	0.324	0.188939	1	-0.0615255	0.264	0.241	0.525979	1	-0.897672	0.092	0.125	0.0682756	1	-0.324325	0.256	0.204	0.151031	1
Mcm3	0.714117	0.651	0.418	8.04018e-07	0.0239075	0.0844154	0.508	0.506	0.917166	1	0.206909	0.548	0.574	0.651781	1	0.0690707	0.758	0.646	0.0456676	1	0.238529	0.505	0.481	0.288011	1	0.0748063	0.629	0.619	0.390057	1
Fzd4	0.131171	0.829	0.598	8.0861e-07	0.024044	0.272995	0.738	0.739	0.424286	1	-0.0513627	0.777	0.815	0.101838	1	0.0635084	0.836	0.772	0.00738172	1	0.386728	0.767	0.742	0.000745788	1	0.126118	0.844	0.827	0.521608	1
Cdh13	0.540934	0.575	0.312	8.10597e-07	0.0241031	0.629883	0.18	0.308	0.0109032	1	-0.107321	0.357	0.333	0.785875	1	-0.354485	0.487	0.549	0.00802829	1	-0.469765	0.105	0.237	6.83068e-09	0.00020311	0.55507	0.359	0.371	0.880004	1
Sorbs1	0.496639	0.842	0.593	8.14705e-07	0.0242253	0.363218	0.598	0.657	0.632885	1	0.106627	0.771	0.833	0.475611	1	0.465415	0.788	0.71	3.61038e-05	1	0.227012	0.535	0.534	0.572622	1	0.0482122	0.715	0.741	0.657823	1
Pex5	0.493459	0.384	0.143	8.19816e-07	0.0243772	-0.485184	0.197	0.248	0.193767	1	-0.474908	0.293	0.25	0.635138	1	0.23228	0.364	0.319	0.315052	1	0.165997	0.184	0.227	0.100074	1	0.0427824	0.218	0.18	0.228947	1
RP23-454A14.10	0.531055	0.404	0.148	8.38961e-07	0.0249465	0.312143	0.23	0.211	0.561848	1	0.659231	0.331	0.259	0.121317	1	0.37221	0.409	0.343	0.0407959	1	0.147228	0.317	0.278	0.103531	1	0.32516	0.342	0.32	0.290196	1
Ptprm	0.418069	0.849	0.651	8.59295e-07	0.0255511	0.634991	0.73	0.708	0.023857	1	0.0253542	0.764	0.824	0.310361	1	0.315639	0.84	0.803	0.00259407	1	0.00719648	0.578	0.655	0.018573	1	-0.207976	0.744	0.803	0.00388947	1
Il6st	0.327563	0.767	0.503	8.64465e-07	0.0257049	0.261324	0.582	0.638	0.967724	1	-0.310023	0.72	0.759	0.12965	1	0.137515	0.781	0.737	0.185505	1	0.359261	0.557	0.577	0.29637	1	0.0550182	0.718	0.765	0.206228	1
Hsd17b4	-0.00373568	0.678	0.381	8.76489e-07	0.0260624	-0.346971	0.393	0.519	0.00644147	1	-0.229562	0.497	0.519	0.219721	1	0.266071	0.628	0.577	0.179707	1	0.315099	0.443	0.471	0.927095	1	0.293452	0.519	0.469	0.309829	1
Acd	0.175425	0.644	0.333	8.79823e-07	0.0261615	-0.0776091	0.344	0.381	0.575331	1	0.362538	0.478	0.463	0.768658	1	-0.0800056	0.558	0.551	0.894296	1	0.180872	0.368	0.352	0.401319	1	-0.00605165	0.522	0.517	0.861823	1
Nupl1	0.626255	0.418	0.159	8.82485e-07	0.0262407	0.474954	0.221	0.283	0.372706	1	-0.301325	0.242	0.278	0.419983	1	0.0266767	0.353	0.336	0.956961	1	0.326698	0.146	0.177	0.245372	1	-0.28467	0.254	0.238	0.661281	1
Prdx3	0.312151	0.562	0.291	8.93653e-07	0.0265728	-0.132716	0.303	0.365	0.189883	1	-0.216153	0.395	0.5	0.0768718	1	0.119855	0.561	0.535	0.675816	1	-0.46657	0.238	0.333	0.000499157	1	0.342074	0.457	0.408	0.0707475	1
Xntrpc	0.680956	0.164	0.016	8.97321e-07	0.0266818	-0.0350049	0.057	0.047	0.670272	1	0.757377	0.134	0.093	0.323954	1	0.814285	0.197	0.086	2.57039e-05	0.764304	-0.201646	0.045	0.053	0.521169	1	-0.165249	0.093	0.116	0.332514	1
Khdrbs1	0.42688	0.692	0.429	9.08818e-07	0.0270237	-0.602211	0.328	0.55	5.21077e-05	1	-0.370088	0.643	0.759	0.00183658	1	0.186038	0.625	0.637	0.577568	1	-0.187029	0.278	0.402	5.00682e-05	1	0.18895	0.557	0.633	0.451005	1
Triobp	0.104676	0.808	0.529	9.1857e-07	0.0273137	-0.250909	0.672	0.723	0.167034	1	0.114501	0.701	0.731	0.595052	1	0.268095	0.848	0.748	0.017802	1	0.189281	0.647	0.694	0.764046	1	-0.101199	0.761	0.793	0.122813	1
Ecm1	0.252064	0.966	0.735	9.20385e-07	0.0273676	0.380558	0.918	0.852	0.0103652	1	-0.00771351	0.892	0.954	0.442202	1	0.308141	0.914	0.863	0.00437525	1	0.513648	0.878	0.796	5.7526e-08	0.00171053	-0.0711419	0.933	0.959	0.0251841	1
Dcun1d3	1.14811	0.219	0.042	9.29662e-07	0.0276435	-1.50332	0.049	0.097	0.104307	1	-1.48361	0.07	0.148	0.0319124	1	0.193606	0.186	0.157	0.287135	1	-0.236691	0.034	0.053	0.120351	1	-0.402859	0.06	0.167	5.23889e-06	0.155778
Gm10382	-0.285883	0.959	0.989	9.33954e-07	0.0277711	-0.123443	0.918	0.928	0.252695	1	0.277148	0.975	0.954	0.000205869	1	-0.144408	0.948	0.896	0.0604033	1	0.0326005	0.826	0.876	0.934828	1	0.211562	0.866	0.891	0.00435398	1
Mtm1	1.23247	0.336	0.116	9.40191e-07	0.0279566	-0.789335	0.074	0.116	0.202557	1	0.447289	0.217	0.102	0.0165525	1	-0.299458	0.32	0.186	5.46297e-05	1	-0.174265	0.079	0.113	0.0615251	1	0.727407	0.213	0.167	0.12099	1
Abca7	0.531078	0.521	0.243	9.4552e-07	0.028115	0.246568	0.385	0.358	0.60404	1	-0.0159387	0.363	0.435	0.22904	1	0.251216	0.435	0.312	0.000886331	1	0.335154	0.248	0.227	0.356418	1	-0.647108	0.333	0.442	0.000539873	1
Ldah	0.688529	0.507	0.254	9.4552e-07	0.028115	-0.214083	0.23	0.349	0.0196175	1	-0.608516	0.306	0.556	6.33305e-05	1	0.179222	0.487	0.416	0.0350818	1	0.533517	0.212	0.268	0.067174	1	-0.344806	0.356	0.401	0.191505	1
Map1s	-0.0709723	0.534	0.254	9.54096e-07	0.02837	-0.308654	0.295	0.421	0.015252	1	0.0433382	0.395	0.463	0.290373	1	0.556622	0.517	0.431	0.0233194	1	0.11269	0.33	0.388	0.0850658	1	-0.0842549	0.476	0.476	0.506375	1
Sh2b3	0.507822	0.87	0.704	9.60294e-07	0.0285543	0.438511	0.787	0.808	0.25761	1	0.148321	0.815	0.907	0.061966	1	-0.162813	0.829	0.85	0.790677	1	0.302733	0.705	0.701	0.0930015	1	-0.112843	0.778	0.823	0.0260421	1
Lrp4	-0.684211	0.397	0.153	9.64348e-07	0.0286749	0.184908	0.197	0.211	0.822585	1	-0.0838499	0.236	0.213	0.612607	1	0.571885	0.39	0.122	2.6339e-16	7.83191e-12	-0.225513	0.189	0.244	0.0249721	1	-0.121835	0.179	0.252	0.0287269	1
Smpd1	0.463298	0.671	0.407	9.71331e-07	0.0288825	0.730857	0.492	0.478	0.197884	1	0.186271	0.541	0.583	0.527292	1	0.121055	0.688	0.653	0.652624	1	0.171406	0.48	0.515	0.568227	1	-0.0438262	0.612	0.571	0.605561	1
Gm29585	0.563189	0.452	0.19	9.71838e-07	0.0288976	0.0196237	0.279	0.261	0.759243	1	0.199749	0.293	0.296	0.936237	1	0.595852	0.405	0.31	0.00515962	1	0.283599	0.21	0.239	0.469315	1	-0.169447	0.239	0.262	0.522725	1
Pcdhb8	1.77648	0.137	0.005	9.72702e-07	0.0289233	0.0879953	0.057	0.05	0.76362	1	-0.62574	0.076	0.056	0.538443	1	0.0169637	0.089	0.055	0.0796862	1	0.125537	0.03	0.038	0.48997	1	0.354844	0.11	0.048	0.00395542	1
Reck	1.25916	0.397	0.164	9.79421e-07	0.0291231	0.536595	0.23	0.201	0.517358	1	0.0647138	0.325	0.315	0.933327	1	0.508826	0.468	0.4	0.0688344	1	0.109783	0.186	0.234	0.0812722	1	0.100789	0.366	0.293	0.0375186	1
Phf1	0.327792	0.596	0.307	9.7956e-07	0.0291272	-0.209371	0.533	0.478	0.338673	1	-0.239891	0.471	0.611	0.04449	1	-0.178138	0.606	0.553	0.909719	1	-0.156774	0.42	0.491	0.0286554	1	0.0169766	0.536	0.568	0.259247	1
Dnajc14	0.549982	0.788	0.524	9.80659e-07	0.0291599	0.220091	0.598	0.657	0.792338	1	0.370257	0.771	0.815	0.601683	1	0.307914	0.762	0.71	0.013508	1	0.0647019	0.497	0.607	0.0193547	1	-0.0196419	0.703	0.745	0.148911	1
Zc3h10	0.681897	0.459	0.212	9.86027e-07	0.0293195	-0.313925	0.139	0.204	0.102066	1	0.0670881	0.261	0.222	0.491427	1	0.610391	0.468	0.398	0.201705	1	0.51766	0.154	0.156	0.993163	1	0.243643	0.275	0.197	0.0189877	1
Tmx3	0.210248	0.74	0.434	9.89283e-07	0.0294163	-0.0582804	0.426	0.459	0.682132	1	-0.179983	0.529	0.611	0.202714	1	0.242462	0.751	0.611	0.000300392	1	0.0644042	0.302	0.351	0.13031	1	-0.33885	0.524	0.639	0.000101919	1
Acbd4	0.331578	0.541	0.275	1.00156e-06	0.0297813	0.144135	0.303	0.368	0.174162	1	-0.305217	0.433	0.519	0.0754327	1	0.337805	0.554	0.473	0.245194	1	0.128579	0.295	0.302	0.842724	1	-0.0975385	0.447	0.483	0.220905	1
Actr10	0.447313	0.753	0.481	1.00219e-06	0.0298001	-0.330655	0.492	0.714	4.68444e-05	1	0.159574	0.656	0.704	0.219682	1	0.104281	0.766	0.701	0.393476	1	-0.180437	0.482	0.605	5.70378e-05	1	-0.0386997	0.677	0.714	0.823318	1
Grina	0.423776	0.774	0.529	1.00361e-06	0.0298424	0.0313134	0.598	0.736	0.156965	1	0.51984	0.726	0.731	0.284158	1	-0.062295	0.788	0.739	0.178295	1	0.0768409	0.642	0.734	0.00854061	1	0.162067	0.703	0.653	0.0444849	1
Cpsf7	0.73884	0.5	0.243	1.01074e-06	0.0300544	0.29175	0.262	0.336	0.356657	1	-0.248881	0.318	0.38	0.294651	1	-0.0308422	0.494	0.381	0.0254736	1	-0.129213	0.22	0.289	0.0149346	1	0.748367	0.344	0.272	0.0391458	1
Sept10	0.323768	0.473	0.201	1.01397e-06	0.0301504	-0.267972	0.262	0.362	0.0724564	1	-0.764208	0.344	0.62	5.66471e-07	0.016844	0.104403	0.431	0.334	0.0189631	1	-0.239849	0.203	0.277	0.00252188	1	-0.356773	0.414	0.554	2.60019e-05	0.773165
Tmc6	0.428506	0.616	0.333	1.01551e-06	0.0301963	-0.145445	0.369	0.516	0.0206089	1	-0.491379	0.408	0.519	0.0611986	1	-0.00515381	0.606	0.527	0.151424	1	0.106764	0.306	0.45	0.000226326	1	0.113939	0.414	0.459	0.339577	1
Sh3tc1	0.281224	0.836	0.608	1.02409e-06	0.0304514	0.244091	0.73	0.755	0.762779	1	0.00920168	0.828	0.787	0.721252	1	0.441038	0.814	0.752	0.000318278	1	0.120624	0.66	0.692	0.747905	1	-0.0981219	0.813	0.82	0.077314	1
Sephs1	0.769646	0.377	0.132	1.04032e-06	0.0309338	-0.0497721	0.148	0.252	0.0182634	1	-0.106618	0.236	0.306	0.183461	1	-0.061332	0.383	0.283	0.00285237	1	-0.938334	0.107	0.213	1.2003e-06	0.0356909	0.0811262	0.232	0.282	0.232704	1
Pde9a	0.978795	0.397	0.159	1.05179e-06	0.0312748	0.471301	0.262	0.236	0.412506	1	-0.230082	0.217	0.287	0.197164	1	-0.315176	0.387	0.372	0.83704	1	1.16815	0.15	0.129	0.182155	1	-0.183917	0.17	0.245	0.0146237	1
Alg12	0.486366	0.363	0.122	1.05591e-06	0.0313974	-0.263068	0.172	0.264	0.0434179	1	-0.168489	0.217	0.204	0.786538	1	-0.160103	0.316	0.42	0.00222561	1	0.00944454	0.182	0.201	0.495936	1	0.789459	0.263	0.156	0.000681286	1
Abcf3	0.649076	0.534	0.296	1.05802e-06	0.0314603	0.534289	0.393	0.418	0.872848	1	0.0761165	0.548	0.463	0.459518	1	0.0737458	0.569	0.515	0.359563	1	-0.0408855	0.338	0.402	0.0892126	1	0.435814	0.548	0.452	0.00797497	1
Tmed7	0.429516	0.692	0.423	1.05973e-06	0.0315112	-0.428327	0.418	0.481	0.0699442	1	0.154636	0.541	0.676	0.110192	1	0.194104	0.68	0.604	0.0258584	1	-0.347549	0.285	0.405	3.43872e-05	1	-0.297009	0.519	0.619	0.00360734	1
Lrch4	0.322576	0.527	0.243	1.06294e-06	0.0316066	0.104132	0.369	0.494	0.0930348	1	0.71675	0.433	0.417	0.574536	1	0.281266	0.483	0.442	0.495658	1	-0.0361102	0.298	0.373	0.0154087	1	-0.157329	0.464	0.415	0.235078	1
Usp28	-0.0491072	0.192	0.026	1.06678e-06	0.0317208	0.215997	0.016	0.035	0.321129	1	-0.0416141	0.096	0.139	0.298687	1	1.13888	0.115	0.077	0.0975904	1	0.0834143	0.024	0.034	0.334911	1	-0.424265	0.081	0.109	0.225562	1
Gns	0.472585	0.692	0.397	1.08182e-06	0.0321678	0.0616316	0.484	0.575	0.281873	1	0.0823033	0.631	0.574	0.60484	1	0.366097	0.729	0.646	0.023685	1	0.41248	0.548	0.533	0.231357	1	0.193356	0.644	0.643	0.595921	1
Enpp4	0.331563	0.747	0.503	1.08494e-06	0.0322608	-0.00871911	0.516	0.597	0.137832	1	0.00464432	0.662	0.694	0.460161	1	0.25768	0.762	0.695	0.100788	1	-0.234314	0.407	0.507	7.60549e-05	1	0.10111	0.711	0.67	0.285389	1
Scd2	0.435864	0.521	0.238	1.09539e-06	0.0325713	-0.149734	0.164	0.252	0.0314252	1	-0.583669	0.299	0.278	0.918178	1	0.734947	0.539	0.374	2.21508e-05	0.658655	-0.158548	0.159	0.227	0.00842976	1	-0.187299	0.263	0.231	0.37716	1
Map3k6	0.527205	0.384	0.138	1.10951e-06	0.0329912	1.63628	0.197	0.085	0.000986712	1	-0.0211988	0.248	0.231	0.895424	1	0.0827285	0.342	0.124	1.6566e-12	4.92589e-08	0.719039	0.079	0.058	0.150897	1	0.528233	0.254	0.173	0.0101239	1
Tmem256	0.466511	0.651	0.344	1.13961e-06	0.0338864	-0.211902	0.516	0.575	0.279779	1	-0.968757	0.516	0.667	0.000540498	1	0.0291513	0.599	0.558	0.137982	1	-0.452651	0.366	0.486	9.21595e-05	1	-0.420463	0.596	0.639	0.194209	1
Tmem127	0.414151	0.562	0.27	1.14518e-06	0.0340521	0.0228739	0.311	0.296	0.845579	1	0.0138828	0.484	0.565	0.322786	1	-0.129361	0.532	0.535	0.219791	1	0.357063	0.274	0.265	0.524834	1	-0.078088	0.445	0.588	0.00464676	1
Tcirg1	-0.0141928	0.788	0.476	1.14787e-06	0.0341319	0.12566	0.615	0.632	0.677217	1	0.0163056	0.669	0.685	0.636788	1	0.289776	0.758	0.692	0.387027	1	0.303902	0.632	0.589	0.0561859	1	0.186582	0.768	0.643	0.0253447	1
Tmem55a	0.35965	0.534	0.249	1.1671e-06	0.0347036	-0.23734	0.238	0.371	0.00804407	1	0.281292	0.42	0.398	0.694268	1	0.487584	0.52	0.487	0.285838	1	-0.204937	0.201	0.277	0.00625067	1	0.204924	0.433	0.395	0.28421	1
Trappc9	0.634342	0.26	0.063	1.1695e-06	0.034775	-0.864353	0.156	0.195	0.280212	1	1.24642	0.159	0.204	0.428049	1	0.777333	0.294	0.237	0.0761072	1	0.503869	0.186	0.139	0.022147	1	0.147799	0.244	0.17	0.0303297	1
Ext1	1.00436	0.281	0.079	1.18115e-06	0.0351216	0.200164	0.107	0.075	0.281056	1	0.00618194	0.134	0.185	0.262292	1	-0.385963	0.238	0.208	0.381145	1	0.635268	0.088	0.072	0.297357	1	-0.239992	0.112	0.146	0.147424	1
Trib2	0.321562	0.753	0.503	1.19292e-06	0.0354716	0.54586	0.549	0.484	0.0474196	1	-0.189283	0.637	0.667	0.0442292	1	0.218782	0.695	0.67	0.140094	1	0.112493	0.473	0.529	0.229318	1	0.254452	0.722	0.694	0.404845	1
Bap1	0.281526	0.603	0.307	1.19556e-06	0.0355501	-0.114412	0.402	0.503	0.134067	1	0.38282	0.497	0.481	0.713747	1	0.158477	0.543	0.575	0.284665	1	-0.16204	0.375	0.423	0.107139	1	-0.195439	0.502	0.446	0.275466	1
Klrg2	2.05767	0.171	0.021	1.20885e-06	0.0359453	-0.983691	0.074	0.094	0.460437	1	0.592889	0.146	0.074	0.0802645	1	0.829159	0.197	0.181	0.686257	1	-0.0669709	0.034	0.065	0.018198	1	-0.497618	0.103	0.112	0.688299	1
4930427A07Rik	0.26675	0.377	0.138	1.21546e-06	0.0361418	-0.2823	0.221	0.173	0.206304	1	-0.00605238	0.306	0.426	0.0423161	1	0.304827	0.405	0.197	3.4157e-10	1.01566e-05	0.0830488	0.113	0.125	0.580707	1	-0.319821	0.194	0.422	2.1224e-10	6.31097e-06
Fam57a	0.195233	0.651	0.392	1.22238e-06	0.0363475	0.273449	0.443	0.371	0.148858	1	0.339598	0.484	0.472	0.661188	1	0.00403093	0.632	0.549	0.0688119	1	0.193	0.345	0.405	0.256328	1	0.253325	0.555	0.439	0.000761407	1
Lamb2	0.363857	0.877	0.757	1.24704e-06	0.0370807	0.483868	0.852	0.83	0.00769235	1	-0.193965	0.911	0.944	0.00906616	1	0.616344	0.914	0.885	5.31623e-08	0.00158078	0.361618	0.869	0.866	0.000126686	1	-0.432625	0.897	0.932	4.19469e-08	0.00124729
Abcd1	0.0913181	0.486	0.233	1.25379e-06	0.0372816	-0.538233	0.295	0.431	0.00834588	1	0.0612201	0.369	0.324	0.446294	1	0.182379	0.546	0.473	0.114392	1	0.0453532	0.381	0.445	0.057101	1	0.363205	0.419	0.395	0.400012	1
Slc35a3	0.286679	0.548	0.254	1.26711e-06	0.0376776	-0.0326774	0.295	0.333	0.524129	1	-0.385777	0.35	0.519	0.00929983	1	0.311988	0.572	0.502	0.0317977	1	-0.460481	0.208	0.33	6.72176e-06	0.199871	-0.226457	0.409	0.418	0.665313	1
Ascc2	-0.174712	0.418	0.159	1.2753e-06	0.0379211	0.112504	0.205	0.236	0.560574	1	0.65769	0.312	0.296	0.601005	1	0.389333	0.383	0.356	0.736254	1	0.109614	0.176	0.204	0.271453	1	0.243577	0.323	0.272	0.152515	1
Ctsf	0.236354	0.521	0.259	1.28871e-06	0.0383199	0.226494	0.361	0.333	0.44379	1	-0.691708	0.401	0.398	0.428822	1	0.309391	0.48	0.416	0.414973	1	-0.179956	0.201	0.301	0.000219972	1	0.120688	0.438	0.408	0.371384	1
Map3k11	0.416733	0.849	0.63	1.30254e-06	0.0387309	0.259553	0.795	0.811	0.418998	1	0.006288	0.796	0.824	0.450954	1	0.117776	0.766	0.754	0.476507	1	-0.0424835	0.674	0.727	0.291173	1	-0.0290827	0.787	0.789	0.386982	1
Lrp10	0.302724	0.87	0.603	1.31414e-06	0.0390759	0.167678	0.803	0.843	0.994976	1	-0.130722	0.803	0.87	0.135255	1	0.188058	0.814	0.779	0.97526	1	0.11081	0.743	0.813	0.562229	1	0.144632	0.706	0.789	0.899429	1
Zmat3	0.850653	0.288	0.085	1.34842e-06	0.0400954	0.146167	0.098	0.132	0.399396	1	0.0244723	0.21	0.185	0.744633	1	0.43649	0.182	0.133	0.0952255	1	0.162635	0.096	0.086	0.556757	1	0.44468	0.153	0.122	0.254143	1
Rsl24d1	0.329605	0.384	0.138	1.35205e-06	0.0402033	-0.449509	0.164	0.267	0.0191619	1	-0.285289	0.287	0.407	0.0236476	1	-0.00165144	0.405	0.358	0.190775	1	-0.147608	0.159	0.263	9.89892e-05	1	0.333772	0.344	0.31	0.254575	1
Mkrn1	0.409342	0.63	0.349	1.35241e-06	0.040214	0.208569	0.336	0.374	0.562359	1	-0.612431	0.478	0.565	0.0378276	1	0.518694	0.58	0.52	0.190466	1	-0.414452	0.261	0.356	0.000447886	1	-0.430727	0.471	0.551	0.0177083	1
Limk2	-0.125612	0.61	0.296	1.35486e-06	0.0402869	-0.0570625	0.287	0.387	0.0534916	1	0.208418	0.452	0.472	0.594647	1	-0.186436	0.569	0.527	0.429123	1	0.21454	0.308	0.392	0.0224878	1	0.215148	0.493	0.466	0.60729	1
Igfbp7	0.62057	0.863	0.714	1.36617e-06	0.040623	-0.969032	0.631	0.849	1.28607e-08	0.000382413	0.0320631	0.726	0.75	0.513364	1	-0.215056	0.877	0.876	0.000998819	1	-0.699267	0.568	0.84	3.99463e-24	1.1878e-19	-0.0575198	0.706	0.823	0.666323	1
Prdx6	0.236758	0.705	0.418	1.3716e-06	0.0407846	-0.00567751	0.516	0.572	0.367332	1	0.184865	0.637	0.657	0.752457	1	0.0715086	0.691	0.631	0.0525007	1	0.112969	0.484	0.54	0.268333	1	0.0816089	0.622	0.602	0.684327	1
RP23-105B8.2	0.0343746	0.281	0.079	1.37211e-06	0.0407998	-0.858088	0.041	0.053	0.56723	1	-0.0953236	0.051	0.139	0.0164653	1	0.089831	0.283	0.111	6.11212e-09	0.000181744	-0.0442089	0.036	0.065	0.0298143	1	-0.0715653	0.062	0.088	0.178623	1
Cenpb	0.100583	0.459	0.19	1.39978e-06	0.0416225	-0.934904	0.139	0.305	0.000428714	1	-0.383953	0.261	0.296	0.391551	1	-0.683195	0.379	0.511	3.27803e-05	0.974723	-0.622629	0.116	0.232	5.17558e-07	0.0153896	0.312384	0.292	0.276	0.486945	1
Gm15419	0.794014	0.267	0.074	1.40059e-06	0.0416467	-0.115822	0.197	0.17	0.627674	1	-0.183432	0.166	0.269	0.0597684	1	0.485927	0.223	0.088	4.69259e-07	0.0139534	0.337755	0.214	0.149	0.00387058	1	-0.475692	0.103	0.218	3.36002e-05	0.999102
Abcc3	2.11752	0.171	0.021	1.42465e-06	0.0423621	-0.353217	0.09	0.082	0.824427	1	-0.0488729	0.032	0.102	0.0206985	1	1.10499	0.186	0.02	6.55437e-15	1.94894e-10	-0.33674	0.064	0.07	0.636547	1	-0.26545	0.112	0.187	0.00744115	1
Atp13a2	-0.00431836	0.582	0.27	1.43681e-06	0.0427236	0.540054	0.508	0.503	0.517949	1	0.357932	0.42	0.463	0.510881	1	0.118383	0.532	0.562	0.243884	1	0.423896	0.432	0.399	0.0690513	1	-0.0672885	0.478	0.52	0.175323	1
Stam2	0.182504	0.562	0.286	1.44605e-06	0.0429984	0.753725	0.41	0.362	0.163208	1	0.291446	0.408	0.389	0.524471	1	0.313441	0.569	0.518	0.10462	1	0.204248	0.341	0.332	0.611971	1	0.261535	0.371	0.401	0.445091	1
Tmem184b	0.235871	0.849	0.651	1.44957e-06	0.0431031	0.463315	0.844	0.808	0.0205626	1	0.254493	0.892	0.843	0.630025	1	0.29641	0.87	0.788	0.0018358	1	0.031581	0.745	0.804	0.482473	1	0.11279	0.844	0.878	0.582467	1
Fbxo25	0.127636	0.473	0.196	1.46259e-06	0.0434901	0.120089	0.336	0.346	0.886327	1	-0.274504	0.312	0.324	0.54212	1	0.383944	0.457	0.372	0.0304891	1	0.170877	0.261	0.275	0.791264	1	0.127023	0.311	0.272	0.207418	1
Eif4g3	0.454931	0.658	0.37	1.47061e-06	0.0437286	-0.105583	0.459	0.522	0.184074	1	-0.0663935	0.452	0.63	0.00176206	1	-0.19949	0.617	0.602	0.924484	1	-0.498275	0.25	0.369	3.82834e-05	1	-0.307735	0.462	0.534	0.0378621	1
Arhgap17	0.10291	0.63	0.344	1.47677e-06	0.0439118	-0.0627763	0.5	0.469	0.562638	1	0.473346	0.516	0.537	0.986913	1	0.211501	0.658	0.588	0.0644627	1	0.0713338	0.486	0.438	0.101178	1	0.186867	0.524	0.537	0.855577	1
Mrgpre	0.482882	0.582	0.312	1.47737e-06	0.0439296	-0.0919304	0.443	0.484	0.615182	1	0.610535	0.522	0.574	0.58968	1	-0.137291	0.558	0.558	0.449121	1	0.00830583	0.349	0.412	0.034725	1	-0.339965	0.495	0.537	0.135354	1
Ppp6c	0.208128	0.76	0.476	1.47801e-06	0.0439486	-0.203471	0.402	0.491	0.0714745	1	-0.209431	0.58	0.648	0.117785	1	0.229888	0.725	0.69	0.276515	1	0.0346431	0.306	0.387	0.0140767	1	-0.0756163	0.553	0.578	0.382048	1
Tbkbp1	0.541131	0.486	0.222	1.47892e-06	0.0439756	0.330323	0.27	0.296	0.706665	1	0.33681	0.389	0.5	0.116157	1	0.263397	0.446	0.454	0.705689	1	-0.034535	0.251	0.289	0.234901	1	-0.494204	0.344	0.429	0.00878835	1
Lpin2	0.0742671	0.603	0.323	1.49683e-06	0.0445083	0.48108	0.393	0.39	0.486225	1	0.0867705	0.49	0.519	0.836426	1	0.162325	0.576	0.48	0.0142856	1	0.391191	0.366	0.328	0.0555026	1	-0.366242	0.493	0.568	0.0484504	1
Gm37885	0.446253	0.699	0.392	1.50077e-06	0.0446254	0.169734	0.508	0.491	0.533272	1	0.320757	0.573	0.556	0.311569	1	0.410303	0.636	0.456	1.07186e-06	0.0318718	0.256047	0.46	0.436	0.108981	1	0.0421813	0.56	0.602	0.281078	1
Lama3	0.616044	0.459	0.212	1.50522e-06	0.0447576	-1.19611	0.107	0.217	0.0068023	1	-0.190292	0.255	0.259	0.839181	1	0.364208	0.491	0.427	0.100976	1	0.838147	0.158	0.16	0.916085	1	-0.426551	0.246	0.299	0.0926666	1
Uhrf2	0.843648	0.384	0.148	1.50612e-06	0.0447845	-0.236999	0.189	0.236	0.287992	1	-0.447431	0.299	0.361	0.300918	1	-0.126576	0.331	0.305	0.688684	1	-0.308312	0.167	0.239	0.00361897	1	0.236234	0.354	0.33	0.383657	1
Gm26718	0.514218	0.363	0.132	1.50642e-06	0.0447933	-0.0479123	0.164	0.245	0.081785	1	-0.391187	0.217	0.306	0.112908	1	0.201022	0.301	0.274	0.453535	1	-0.440626	0.146	0.21	0.00604559	1	0.468187	0.335	0.235	0.00789962	1
Trp53inp1	0.397279	0.336	0.116	1.5227e-06	0.0452776	0.343033	0.18	0.195	0.752255	1	-0.145752	0.185	0.222	0.421173	1	-0.149914	0.23	0.181	0.122615	1	0.288654	0.118	0.105	0.475156	1	-0.522472	0.117	0.139	0.3334	1
Epb4.1l2	0.392831	0.644	0.349	1.533e-06	0.0455837	0.00979716	0.418	0.472	0.586908	1	0.357838	0.541	0.454	0.156008	1	-0.0401062	0.591	0.613	0.509894	1	-0.0710201	0.326	0.399	0.0241933	1	-0.274563	0.49	0.517	0.46631	1
Nr3c1	0.217278	0.836	0.534	1.5333e-06	0.0455927	-0.573409	0.352	0.632	1.67421e-06	0.0497826	-0.482524	0.599	0.796	0.00171376	1	0.158	0.729	0.73	0.424961	1	-0.563392	0.36	0.595	9.64412e-14	2.86768e-09	-0.174929	0.66	0.765	0.0128665	1
Copg1	0.295419	0.849	0.672	1.55329e-06	0.046187	-0.0879585	0.598	0.726	0.154701	1	0.28229	0.726	0.667	0.319233	1	0.149876	0.814	0.772	0.114235	1	0.19868	0.623	0.698	0.174895	1	0.302672	0.766	0.755	0.0921035	1
Tyk2	0.810045	0.377	0.143	1.57255e-06	0.0467598	0.0738015	0.295	0.261	0.387812	1	0.234034	0.274	0.407	0.0501459	1	0.349214	0.364	0.327	0.259062	1	0.0339659	0.255	0.265	0.723531	1	-0.771536	0.294	0.371	0.0102312	1
Tbc1d20	0.571544	0.658	0.381	1.57419e-06	0.0468087	0.52661	0.557	0.553	0.580234	1	0.102462	0.643	0.62	0.819399	1	-0.0449934	0.684	0.65	0.850333	1	-0.31632	0.433	0.522	0.0145879	1	0.214484	0.656	0.582	0.045314	1
Pef1	0.234516	0.726	0.429	1.57422e-06	0.0468093	0.105074	0.549	0.575	0.951946	1	0.0724827	0.605	0.704	0.0895089	1	-0.174759	0.699	0.677	0.0612126	1	0.208717	0.606	0.593	0.216731	1	0.000246167	0.598	0.595	0.927557	1
Camk2d	0.281558	0.774	0.508	1.58111e-06	0.0470144	-0.340962	0.492	0.547	0.229401	1	-0.206227	0.541	0.778	0.000873249	1	0.127844	0.755	0.712	0.0873274	1	0.157465	0.486	0.515	0.989446	1	-0.0282396	0.663	0.704	0.149733	1
Rnf10	0.321388	0.685	0.386	1.58629e-06	0.0471683	0.253219	0.492	0.522	0.656547	1	0.251749	0.592	0.537	0.247972	1	-0.254604	0.651	0.662	0.051882	1	-0.108446	0.366	0.495	0.000548298	1	-0.0152475	0.541	0.575	0.540174	1
Dnajc10	0.0593289	0.753	0.455	1.60729e-06	0.0477927	0.0517915	0.574	0.616	0.787004	1	0.249104	0.745	0.704	0.326482	1	0.332516	0.743	0.677	0.0022203	1	-0.114143	0.486	0.567	0.0497433	1	0.138401	0.718	0.755	0.559349	1
Gfod2	0.446082	0.63	0.333	1.61284e-06	0.0479579	0.0647026	0.459	0.472	0.778548	1	0.469652	0.478	0.491	0.946068	1	-0.0436604	0.587	0.522	0.0558668	1	0.5481	0.379	0.387	0.921156	1	0.110153	0.51	0.483	0.516586	1
Nelfb	0.0592522	0.774	0.503	1.61594e-06	0.0480498	0.0441888	0.5	0.629	0.0268634	1	0.453944	0.694	0.657	0.201818	1	0.0745551	0.71	0.706	0.768089	1	0.188752	0.548	0.605	0.264038	1	0.0709547	0.679	0.714	0.441101	1
Stc1	1.31502	0.39	0.159	1.64092e-06	0.0487928	-0.133631	0.295	0.195	0.0243134	1	-0.894761	0.369	0.315	0.308428	1	0.302201	0.509	0.412	0.0111708	1	0.506166	0.261	0.208	0.0177562	1	0.11965	0.531	0.463	0.12616	1
Dctn3	0.251208	0.829	0.529	1.66393e-06	0.0494769	-0.0246036	0.549	0.682	0.153212	1	-0.421326	0.618	0.787	0.00319596	1	0.0660565	0.729	0.735	0.92579	1	-0.0983325	0.482	0.576	0.0138341	1	-0.494835	0.684	0.779	0.000926149	1
Adam9	0.976891	0.411	0.169	1.67154e-06	0.0497033	0.334364	0.23	0.252	0.644986	1	0.413448	0.427	0.389	0.470764	1	0.125098	0.335	0.358	0.502096	1	-0.237943	0.21	0.208	0.978263	1	-0.480927	0.306	0.493	1.51949e-06	0.0451821
Adamts6	1.78147	0.144	0.011	1.72563e-06	0.0513116	-0.55017	0.025	0.025	0.966654	1	0.21	0.038	0.046	0.769805	1	0.543158	0.126	0.035	4.08783e-06	0.121552	0.176424	0.053	0.041	0.353566	1	-0.0714353	0.038	0.075	0.0360495	1
Itgb3bp	0.74852	0.37	0.143	1.72985e-06	0.0514371	-0.241758	0.18	0.255	0.122489	1	-0.341178	0.268	0.361	0.0818852	1	0.0907012	0.327	0.33	0.99011	1	-0.536132	0.146	0.232	0.000568389	1	-0.78512	0.275	0.378	0.000489513	1
Rbp1	0.276922	0.301	0.095	1.73062e-06	0.0514599	-0.347832	0.025	0.088	0.0199849	1	-0.0658082	0.121	0.167	0.25615	1	-0.657202	0.268	0.265	0.825259	1	-0.370125	0.038	0.082	0.00162999	1	-0.413392	0.134	0.221	0.00384604	1
Chst8	0.0810943	0.774	0.45	1.73122e-06	0.0514778	0.394617	0.689	0.613	0.0344502	1	-0.374607	0.554	0.657	0.0341072	1	0.723573	0.751	0.582	3.24271e-06	0.096422	0.472488	0.664	0.564	1.12136e-06	0.0333436	-0.0769648	0.598	0.677	0.0189187	1
Abhd13	1.35397	0.212	0.042	1.73532e-06	0.0515998	0.100437	0.098	0.123	0.504007	1	0.438685	0.21	0.259	0.490819	1	0.77029	0.234	0.135	0.000683471	1	-0.380412	0.064	0.113	0.00408876	1	-0.398334	0.179	0.156	0.394482	1
Use1	-0.082835	0.664	0.381	1.77112e-06	0.0526642	-0.215048	0.385	0.547	0.00761748	1	0.270502	0.662	0.63	0.288507	1	-0.127831	0.684	0.692	0.360672	1	-0.277452	0.441	0.507	0.0715811	1	0.0739533	0.593	0.636	0.96212	1
Ppp2r5b	0.846349	0.404	0.164	1.77746e-06	0.0528527	0.103179	0.303	0.333	0.557036	1	-0.0632342	0.357	0.407	0.304328	1	0.0922057	0.375	0.394	0.679132	1	0.26378	0.248	0.227	0.373205	1	0.454049	0.361	0.344	0.504022	1
Cables2	0.190094	0.582	0.312	1.78409e-06	0.0530499	-1.00674	0.303	0.55	5.08318e-07	0.0151148	0.512906	0.465	0.333	0.0192297	1	0.160763	0.632	0.586	0.523945	1	-0.405019	0.285	0.474	4.65944e-11	1.38548e-06	0.338045	0.481	0.364	0.00315106	1
Tnfsf10	-0.0935211	0.705	0.455	1.79425e-06	0.053352	0.104754	0.5	0.585	0.0792118	1	-0.252868	0.58	0.75	0.00123402	1	0.29107	0.822	0.772	0.000981031	1	0.050942	0.657	0.689	0.257509	1	-0.459971	0.749	0.898	1.04258e-09	3.1001e-05
Rab27b	2.10367	0.13	0.005	1.79805e-06	0.0534651	-0.249696	0.008	0.035	0.131587	1	-1.10033	0.032	0.065	0.199294	1	0.681347	0.126	0.055	0.000790175	1	0.0278288	0.021	0.029	0.345432	1	-0.0208878	0.031	0.034	0.82642	1
Zdhhc17	0.873979	0.479	0.233	1.80108e-06	0.053555	-0.213968	0.287	0.314	0.510626	1	-0.0396669	0.287	0.37	0.158418	1	-0.411264	0.416	0.445	0.268172	1	-0.196501	0.266	0.301	0.235052	1	-0.159758	0.354	0.357	0.85738	1
Cast	0.416962	0.692	0.444	1.81186e-06	0.0538757	0.221545	0.475	0.506	0.91116	1	0.379498	0.58	0.583	0.790854	1	0.084921	0.673	0.675	0.720873	1	-0.204759	0.328	0.433	0.00117332	1	-0.0430315	0.543	0.663	0.00691889	1
Cd55	2.10971	0.158	0.016	1.8351e-06	0.0545668	0.23572	0.049	0.038	0.572115	1	-0.305853	0.076	0.083	0.818219	1	-0.4817	0.112	0.064	0.023325	1	0.204157	0.019	0.015	0.675526	1	0.362886	0.053	0.048	0.750296	1
Mmp2	1.06158	0.411	0.175	1.8419e-06	0.0547689	1.82466	0.156	0.217	0.226875	1	-0.129096	0.172	0.241	0.126458	1	-0.198965	0.372	0.358	0.911654	1	-0.287325	0.118	0.194	0.000905831	1	0.546447	0.268	0.224	0.0713838	1
Arsa	0.111183	0.658	0.386	1.84193e-06	0.0547696	-0.179341	0.516	0.563	0.613476	1	0.199062	0.58	0.574	0.99797	1	-0.0163245	0.658	0.631	0.31709	1	0.0585037	0.499	0.527	0.745677	1	-0.28887	0.591	0.612	0.123208	1
Antxr2	0.15677	0.479	0.222	1.84273e-06	0.0547936	0.593107	0.328	0.255	0.0999211	1	0.748792	0.318	0.324	0.984295	1	0.629986	0.45	0.248	7.36989e-09	0.000219144	0.288404	0.176	0.149	0.177153	1	-0.00242017	0.309	0.293	0.814684	1
Eri2	1.76108	0.144	0.011	1.86447e-06	0.05544	0.372554	0.057	0.047	0.650991	1	0.635427	0.089	0.13	0.299316	1	0.18366	0.149	0.086	0.0105585	1	-0.322832	0.071	0.079	0.652287	1	-0.562894	0.062	0.109	0.0204801	1
Pdia4	0.269143	0.842	0.619	1.89806e-06	0.0564387	0.00703156	0.598	0.714	0.112549	1	-0.204784	0.771	0.843	0.166656	1	-0.121674	0.799	0.777	0.722004	1	0.0935405	0.523	0.603	0.0449418	1	0.138234	0.773	0.748	0.531736	1
Ube2f	0.374634	0.438	0.185	1.90564e-06	0.0566641	0.666414	0.23	0.226	0.806629	1	-0.348272	0.255	0.343	0.158622	1	0.0284329	0.398	0.418	0.467212	1	0.347895	0.201	0.215	0.752932	1	0.275947	0.366	0.286	0.0158186	1
Cyth1	0.502298	0.664	0.413	1.90756e-06	0.0567213	0.0119328	0.574	0.506	0.232005	1	-0.076662	0.535	0.63	0.137953	1	0.666843	0.736	0.546	7.72599e-10	2.29732e-05	0.611882	0.531	0.466	0.00265389	1	-0.331772	0.531	0.588	0.0386527	1
Tsen2	0.915817	0.233	0.053	1.94393e-06	0.0578027	-0.989935	0.066	0.135	0.0380884	1	-0.490969	0.134	0.167	0.403645	1	0.0526112	0.178	0.23	0.0928284	1	0.0390358	0.075	0.115	0.0291137	1	0.0872604	0.141	0.116	0.358979	1
Dctn1	0.290935	0.795	0.519	1.95562e-06	0.0581504	0.387133	0.721	0.783	0.707903	1	-0.114739	0.771	0.806	0.180736	1	0.30326	0.851	0.735	0.00840825	1	-0.0378279	0.692	0.753	0.155428	1	-0.0523691	0.708	0.813	0.0976329	1
Rnf40	-0.0541823	0.493	0.217	1.98162e-06	0.0589236	-0.53889	0.254	0.365	0.0284299	1	0.313383	0.376	0.352	0.627919	1	0.323674	0.442	0.383	0.0616661	1	-0.0118428	0.251	0.292	0.273886	1	-0.229974	0.333	0.381	0.190636	1
Snx17	0.208737	0.877	0.63	1.98527e-06	0.0590319	-0.231879	0.713	0.802	0.0087947	1	0.23361	0.72	0.667	0.339473	1	-0.0975307	0.777	0.783	0.038374	1	-0.0250981	0.711	0.747	0.538567	1	0.183566	0.754	0.728	0.535891	1
Brd8	0.443827	0.589	0.328	1.98795e-06	0.0591117	-0.122833	0.328	0.425	0.0873653	1	-0.22407	0.484	0.648	0.0159919	1	0.267206	0.621	0.518	0.00528517	1	-0.150265	0.285	0.354	0.0245159	1	0.0524975	0.533	0.636	0.0726963	1
Myrip	-0.215276	0.247	0.058	1.98949e-06	0.0591576	0.466113	0.107	0.088	0.530708	1	-1.21816	0.07	0.241	9.64859e-05	1	1.43885	0.245	0.073	5.78592e-11	1.72044e-06	0.757991	0.088	0.057	0.039115	1	-1.31517	0.084	0.241	2.93616e-09	8.73067e-05
Rcan3	2.25801	0.253	0.069	1.99145e-06	0.0592156	0.62676	0.148	0.126	0.552009	1	0.0962724	0.223	0.241	0.660616	1	0.247546	0.279	0.241	0.388034	1	-0.00861815	0.099	0.136	0.0742347	1	-0.293321	0.201	0.194	0.897805	1
Taf8	0.289772	0.452	0.201	1.99964e-06	0.0594593	0.0797102	0.27	0.343	0.12823	1	-0.288605	0.287	0.37	0.185569	1	0.302739	0.468	0.414	0.280183	1	-0.101965	0.235	0.306	0.011708	1	-0.0159999	0.318	0.367	0.166747	1
Cog1	0.17802	0.616	0.328	2.013e-06	0.0598565	-0.183433	0.385	0.409	0.911645	1	0.572068	0.516	0.389	0.0512155	1	0.0120146	0.576	0.544	0.919385	1	0.0910661	0.409	0.436	0.375365	1	0.150665	0.505	0.469	0.256051	1
Rwdd1	0.701267	0.555	0.28	2.01372e-06	0.059878	-0.334701	0.393	0.569	0.00263263	1	-0.451381	0.516	0.546	0.346078	1	-0.106656	0.52	0.588	0.187951	1	-0.20254	0.345	0.435	0.00679045	1	-0.0931021	0.512	0.541	0.947673	1
Pafah1b2	0.162362	0.808	0.524	2.01642e-06	0.0599583	0.0033133	0.549	0.654	0.101977	1	-0.116825	0.605	0.741	0.0313627	1	0.166974	0.796	0.719	0.0108806	1	-0.0254415	0.45	0.55	0.00687585	1	-0.237218	0.722	0.721	0.68055	1
Ptov1	0.433635	0.479	0.217	2.03899e-06	0.0606294	-0.0289259	0.246	0.33	0.0558688	1	-0.843032	0.306	0.38	0.247625	1	0.536564	0.465	0.398	0.100882	1	0.120717	0.251	0.29	0.236809	1	-0.14428	0.275	0.374	0.0121733	1
Dsel	0.83365	0.212	0.042	2.04074e-06	0.0606813	-0.225552	0.09	0.079	0.727186	1	-1.13058	0.108	0.139	0.395991	1	0.321436	0.216	0.15	0.0187739	1	0.660356	0.109	0.058	0.00180503	1	-0.401609	0.108	0.156	0.0496872	1
Mvk	0.863363	0.322	0.116	2.04227e-06	0.0607268	0.785733	0.221	0.17	0.207847	1	-0.825258	0.197	0.222	0.495019	1	-0.327285	0.338	0.263	0.05296	1	-0.151325	0.173	0.194	0.453982	1	0.461723	0.182	0.218	0.270187	1
Cwc15	0.180263	0.767	0.466	2.04366e-06	0.0607681	-0.278795	0.484	0.708	0.00101072	1	-0.211735	0.656	0.713	0.331457	1	-0.205687	0.788	0.723	0.548688	1	-0.576587	0.43	0.619	9.57411e-10	2.84686e-05	-0.493044	0.656	0.765	0.0010004	1
Arnt	0.257431	0.616	0.328	2.05048e-06	0.060971	0.430579	0.434	0.349	0.0542082	1	-0.0117411	0.389	0.509	0.0588044	1	0.289887	0.599	0.507	0.0198037	1	0.406877	0.302	0.258	0.08422	1	-0.0324236	0.445	0.48	0.287616	1
Zswim8	0.943281	0.514	0.249	2.09263e-06	0.0622244	0.0938533	0.279	0.358	0.147348	1	-0.0498193	0.35	0.435	0.134597	1	-0.333294	0.494	0.52	0.388232	1	-0.169239	0.225	0.342	8.59483e-05	1	-0.151702	0.364	0.442	0.0392723	1
E430025E21Rik	0.595613	0.473	0.228	2.09327e-06	0.0622433	-0.120688	0.254	0.318	0.153912	1	0.643742	0.325	0.333	0.901261	1	0.387998	0.487	0.42	0.130798	1	-0.0947669	0.259	0.308	0.129903	1	-0.273599	0.318	0.327	0.587252	1
Abi2	0.977615	0.466	0.201	2.10377e-06	0.0625556	-0.107633	0.23	0.289	0.227034	1	0.118582	0.331	0.481	0.0340445	1	0.0580847	0.413	0.321	0.00405866	1	0.0806229	0.188	0.211	0.386101	1	-0.068028	0.335	0.306	0.542887	1
Gm8337	-0.41618	0.199	0.429	2.10822e-06	0.062688	-0.096121	0.139	0.16	0.620402	1	0.229635	0.229	0.139	0.0419416	1	-0.045677	0.112	0.119	0.628297	1	-0.0272742	0.098	0.098	0.996252	1	0.0881255	0.151	0.116	0.163997	1
Baiap2	0.15901	0.747	0.455	2.11872e-06	0.0630002	0.408657	0.484	0.447	0.43753	1	0.170597	0.548	0.574	0.706756	1	0.340944	0.706	0.628	0.0692854	1	0.215879	0.463	0.478	0.913658	1	0.0445237	0.612	0.497	0.0430963	1
Smap1	0.205811	0.5	0.238	2.13617e-06	0.063519	-0.22165	0.393	0.387	0.82976	1	-0.240789	0.471	0.602	0.0409296	1	0.162148	0.487	0.438	0.195647	1	0.289289	0.251	0.289	0.308814	1	-0.358333	0.438	0.551	0.00344137	1
Casc4	0.934196	0.329	0.116	2.14265e-06	0.0637116	0.255304	0.254	0.226	0.436493	1	-0.174466	0.153	0.306	0.00582022	1	0.513318	0.223	0.08	8.07545e-08	0.00240124	0.0329671	0.064	0.098	0.0478838	1	0.643419	0.089	0.102	0.527169	1
Vdac1	0.308045	0.747	0.46	2.16691e-06	0.0644329	-0.275719	0.5	0.667	0.00899911	1	0.297556	0.631	0.704	0.286505	1	-0.113885	0.703	0.668	0.863763	1	0.172178	0.501	0.536	0.52339	1	0.264248	0.648	0.619	0.420987	1
Tnfaip3	0.826177	0.404	0.164	2.17566e-06	0.0646931	0.616798	0.172	0.217	0.414958	1	-0.212119	0.274	0.398	0.0554941	1	0.0258677	0.335	0.226	0.00157162	1	-0.53004	0.148	0.23	0.000389909	1	0.11058	0.249	0.316	0.117317	1
Gatad2a	0.00967587	0.671	0.349	2.17608e-06	0.0647058	-0.395611	0.533	0.557	0.253086	1	-0.507724	0.503	0.62	0.026123	1	0.175476	0.695	0.626	0.22088	1	0.126346	0.441	0.509	0.0766917	1	0.0546018	0.531	0.568	0.21368	1
Slc10a3	0.497471	0.377	0.148	2.17775e-06	0.0647553	0.187712	0.287	0.23	0.3019	1	-0.229522	0.274	0.25	0.737297	1	0.212365	0.383	0.327	0.233921	1	0.360204	0.206	0.227	0.847372	1	-0.132274	0.256	0.231	0.578134	1
Tmem43	0.292557	0.719	0.466	2.19589e-06	0.0652948	0.0126391	0.59	0.613	0.69322	1	0.237707	0.65	0.648	0.980709	1	0.33369	0.714	0.662	0.000710489	1	0.348267	0.546	0.512	0.0235952	1	0.00502541	0.634	0.568	0.884324	1
Cpped1	0.123927	0.514	0.238	2.22359e-06	0.0661185	-0.287209	0.18	0.286	0.0225304	1	0.421602	0.261	0.38	0.0850982	1	0.54784	0.491	0.361	0.000501204	1	0.0535381	0.261	0.265	0.957709	1	0.502634	0.404	0.316	0.00871779	1
Dst.1	-0.370516	0.356	0.132	2.22454e-06	0.0661467	0.678109	0.139	0.179	0.370264	1	0.385677	0.255	0.185	0.266242	1	0.0386872	0.312	0.261	0.214669	1	0.612057	0.158	0.143	0.434125	1	0.841244	0.311	0.238	0.0501117	1
Mcm7	0.0117065	0.452	0.201	2.23133e-06	0.0663485	0.357483	0.311	0.333	0.565362	1	0.131226	0.395	0.38	0.762128	1	0.0108362	0.364	0.42	0.222642	1	0.410881	0.248	0.301	0.0828033	1	0.279344	0.364	0.323	0.184682	1
Smndc1	0.352742	0.479	0.206	2.253e-06	0.0669929	-0.491274	0.262	0.377	0.0371021	1	-0.268497	0.408	0.398	0.75058	1	0.219507	0.465	0.445	0.543645	1	0.0304591	0.248	0.314	0.0421364	1	-0.272412	0.349	0.463	0.00191173	1
Cyp2d22	0.475455	0.658	0.354	2.28015e-06	0.0678004	0.000965384	0.443	0.569	0.0995588	1	0.0760158	0.631	0.713	0.201851	1	-0.0323533	0.61	0.6	0.969542	1	0.0151	0.435	0.49	0.0892889	1	-0.00794409	0.598	0.636	0.173112	1
Ldb1	0.452367	0.363	0.132	2.29104e-06	0.0681239	0.501706	0.262	0.286	0.684024	1	-0.14118	0.274	0.407	0.0463785	1	-0.374338	0.357	0.451	0.00952596	1	-0.219097	0.18	0.296	6.67198e-06	0.198391	-0.41376	0.278	0.34	0.0611472	1
Phldb2	0.359545	0.726	0.466	2.30007e-06	0.0683926	-0.348462	0.41	0.597	0.00187267	1	-0.202849	0.611	0.704	0.0942491	1	0.23435	0.576	0.546	0.0662698	1	-0.237804	0.317	0.433	0.00048383	1	-0.0187421	0.555	0.646	0.0315097	1
Zfp617	0.785515	0.329	0.116	2.30031e-06	0.0683998	0.279602	0.139	0.132	0.705227	1	-0.598289	0.191	0.278	0.120022	1	0.172645	0.286	0.232	0.168111	1	0.0360107	0.128	0.199	0.00246606	1	-0.699821	0.203	0.303	0.00117626	1
Rapgef5	0.325811	0.699	0.45	2.33724e-06	0.0694977	-0.307017	0.451	0.55	0.0617314	1	-0.575179	0.522	0.648	0.0177898	1	0.208466	0.699	0.646	0.0451346	1	0.258648	0.495	0.491	0.244797	1	-0.179216	0.543	0.595	0.00781239	1
Tmem86a	0.125302	0.534	0.259	2.35715e-06	0.0700898	-0.529007	0.393	0.447	0.153107	1	-1.25581	0.363	0.509	0.00108267	1	-0.0247827	0.576	0.478	0.0341587	1	0.00250924	0.289	0.368	0.0110365	1	0.431906	0.395	0.364	0.175334	1
Lztfl1	0.676901	0.39	0.159	2.36457e-06	0.0703104	-0.375529	0.213	0.182	0.548377	1	-0.214924	0.185	0.296	0.0295998	1	0.0596728	0.361	0.354	0.705784	1	-0.688255	0.107	0.187	0.000165296	1	-0.227983	0.249	0.252	0.902576	1
Mbd1	0.604401	0.493	0.243	2.3884e-06	0.0710191	0.462627	0.402	0.406	0.676847	1	-0.0662345	0.401	0.491	0.208945	1	0.133175	0.524	0.423	0.0138835	1	-0.0705136	0.321	0.399	0.00865377	1	-0.326748	0.445	0.537	0.00230392	1
Pik3c2b	0.262753	0.301	0.09	2.40598e-06	0.0715417	-0.132891	0.156	0.22	0.186217	1	0.802101	0.236	0.167	0.164176	1	0.497072	0.29	0.252	0.255452	1	-0.149473	0.128	0.165	0.092112	1	0.177705	0.225	0.18	0.171015	1
Angel2	0.53362	0.603	0.333	2.41803e-06	0.0719001	-0.181304	0.385	0.425	0.299909	1	0.331632	0.548	0.435	0.133574	1	0.278537	0.636	0.524	0.00102446	1	-0.165577	0.304	0.369	0.0195899	1	0.125836	0.548	0.456	0.0454441	1
Zfp961	0.452393	0.377	0.148	2.43293e-06	0.0723432	0.15674	0.115	0.151	0.311872	1	-0.944568	0.108	0.231	0.00551931	1	0.550653	0.286	0.184	0.00204587	1	-0.0106201	0.064	0.107	0.0125722	1	0.384478	0.172	0.177	0.926607	1
Sumf1	0.424678	0.63	0.381	2.43941e-06	0.0725359	0.0522169	0.393	0.434	0.613167	1	-0.0625962	0.478	0.62	0.0247931	1	-0.351632	0.546	0.522	0.608937	1	0.341272	0.356	0.352	0.609842	1	0.0579542	0.457	0.544	0.0115875	1
Tmem214	0.902885	0.514	0.275	2.45739e-06	0.0730706	-0.0445204	0.344	0.469	0.0172674	1	0.100111	0.408	0.435	0.890024	1	-0.172991	0.558	0.522	0.701166	1	0.462094	0.358	0.376	0.992868	1	0.348877	0.45	0.405	0.0572292	1
Il20rb	0.950376	0.26	0.069	2.46274e-06	0.0732295	0.78046	0.066	0.047	0.436317	1	1.25989	0.07	0.056	0.60546	1	1.5598	0.219	0.06	2.56677e-10	7.6323e-06	1.14696	0.034	0.027	0.540371	1	0.44451	0.098	0.075	0.2625	1
Pramef8	0.25455	0.486	0.238	2.47682e-06	0.0736482	-0.145815	0.123	0.167	0.291669	1	0.650159	0.344	0.306	0.394286	1	0.501826	0.498	0.398	0.00753405	1	-0.226902	0.088	0.16	0.000330382	1	-0.200506	0.335	0.259	0.0195899	1
Peg3	0.0525629	0.534	0.28	2.49698e-06	0.0742478	-1.88665	0.352	0.292	0.41899	1	0.471958	0.427	0.426	0.944416	1	0.601248	0.561	0.511	0.0344147	1	0.875342	0.4	0.296	3.18703e-06	0.0947663	-0.154714	0.524	0.578	0.0185193	1
Phf13	0.660916	0.329	0.111	2.49983e-06	0.0743324	-0.0720016	0.156	0.179	0.543335	1	-0.235631	0.248	0.139	0.0396748	1	0.54897	0.242	0.221	0.650927	1	0.103998	0.099	0.122	0.251247	1	0.466593	0.201	0.129	0.0107234	1
Wrap73	0.179255	0.356	0.127	2.5116e-06	0.0746825	0.328104	0.172	0.201	0.551069	1	0.495313	0.185	0.176	0.887001	1	-0.573924	0.309	0.361	0.04879	1	0.117926	0.148	0.17	0.383813	1	0.596862	0.237	0.15	0.00561472	1
Pnpla2	0.152626	0.849	0.593	2.54524e-06	0.0756828	0.231785	0.656	0.626	0.34286	1	0.116045	0.669	0.704	0.643122	1	0.255	0.836	0.73	0.147614	1	0.442951	0.698	0.677	0.00749948	1	-0.11596	0.658	0.68	0.0851419	1
Prcp	0.0518	0.459	0.201	2.56034e-06	0.0761317	0.503567	0.197	0.264	0.205193	1	-0.147976	0.331	0.352	0.588999	1	-0.069339	0.472	0.42	0.15162	1	-0.331462	0.15	0.263	7.20519e-06	0.214246	0.422411	0.297	0.214	0.00710161	1
Cxcl16	0.584034	0.568	0.296	2.56125e-06	0.0761588	1.41387	0.582	0.384	6.21831e-07	0.0184901	-0.524764	0.516	0.565	0.0679874	1	-0.189885	0.461	0.429	0.662795	1	0.194323	0.353	0.271	0.000644315	1	0.576831	0.421	0.497	0.219278	1
Cox8a	0.501411	0.918	0.762	2.56684e-06	0.076325	-0.0443102	0.885	0.94	0.381607	1	-0.721341	0.885	0.981	5.74302e-07	0.0170769	-0.164441	0.903	0.858	0.312427	1	-0.346018	0.758	0.883	8.80955e-09	0.000261952	-0.468015	0.833	0.956	5.20749e-11	1.54845e-06
Irx3	-0.0181112	0.466	0.196	2.56903e-06	0.0763901	-0.529226	0.32	0.368	0.357719	1	-0.539608	0.42	0.676	8.47626e-06	0.252042	0.13599	0.68	0.673	0.357366	1	-0.0606332	0.518	0.543	0.492689	1	-0.669102	0.644	0.765	6.67906e-07	0.0198602
Cenpt	0.312233	0.562	0.27	2.58411e-06	0.0768385	-0.0661729	0.328	0.428	0.0620867	1	0.286762	0.465	0.324	0.0300754	1	-0.327	0.331	0.423	0.00202395	1	0.612501	0.154	0.211	0.0286328	1	0.372923	0.316	0.248	0.0305229	1
Zhx3	0.196135	0.767	0.487	2.59206e-06	0.0770748	0.256498	0.648	0.654	0.759029	1	0.168229	0.618	0.593	0.360408	1	0.471272	0.74	0.677	0.00381291	1	0.244175	0.561	0.591	0.754228	1	-0.278548	0.632	0.677	0.0513501	1
Gpaa1	0.405121	0.671	0.37	2.62378e-06	0.0780182	0.19602	0.484	0.516	0.513731	1	0.416268	0.554	0.537	0.951521	1	-0.208165	0.543	0.586	0.054345	1	0.248883	0.484	0.473	0.367598	1	0.279771	0.536	0.415	0.00297438	1
Cdc14a	0.316226	0.767	0.492	2.63548e-06	0.078366	-0.168745	0.459	0.594	0.0284651	1	0.447206	0.662	0.685	0.542741	1	0.196375	0.743	0.735	0.629908	1	0.027191	0.477	0.533	0.163112	1	-0.170693	0.617	0.673	0.0885049	1
Tnfrsf23	0.826295	0.432	0.175	2.72119e-06	0.0809147	-0.404814	0.197	0.349	0.00514049	1	0.298931	0.331	0.444	0.105049	1	-0.0898486	0.461	0.469	0.87002	1	-0.349786	0.163	0.271	5.84998e-05	1	-0.136303	0.337	0.337	0.804523	1
Mfsd1	0.245709	0.795	0.55	2.72811e-06	0.0811204	-0.275723	0.656	0.667	0.271973	1	-0.00257353	0.726	0.694	0.82494	1	0.20731	0.822	0.73	0.00762417	1	-0.0457437	0.561	0.596	0.218873	1	0.116174	0.754	0.755	0.912565	1
Birc6	0.16625	0.699	0.455	2.7319e-06	0.081233	-0.558809	0.393	0.55	0.000473131	1	-0.934488	0.58	0.824	8.01457e-08	0.00238313	-0.303567	0.665	0.635	0.317077	1	-0.0936602	0.345	0.447	0.00182961	1	-0.424711	0.61	0.779	6.16099e-09	0.000183197
Rhbdf2	0.551648	0.459	0.206	2.73995e-06	0.0814724	-0.421205	0.279	0.371	0.0344933	1	-0.127221	0.306	0.259	0.562394	1	0.0459475	0.398	0.438	0.331575	1	0.215639	0.242	0.289	0.130415	1	0.323887	0.278	0.218	0.0262973	1
Msh2	0.0642845	0.397	0.153	2.74249e-06	0.0815479	0.284284	0.205	0.217	0.837981	1	0.351595	0.248	0.241	0.834866	1	-0.023348	0.353	0.378	0.479591	1	-0.173674	0.195	0.218	0.345466	1	-0.00499018	0.268	0.245	0.396669	1
Triap1	0.493217	0.411	0.169	2.81416e-06	0.0836791	0.349221	0.32	0.286	0.484586	1	0.226627	0.357	0.231	0.0399927	1	0.311154	0.424	0.447	0.410418	1	-0.46206	0.199	0.282	0.00106466	1	0.141698	0.335	0.347	0.965376	1
Nr1d2	0.191954	0.671	0.36	2.83585e-06	0.084324	0.619653	0.393	0.318	0.0645677	1	-0.441728	0.35	0.62	1.40501e-05	0.41778	0.352852	0.558	0.431	0.00127127	1	0.320613	0.283	0.27	0.370068	1	-0.990099	0.328	0.626	6.22036e-17	1.84963e-12
Pex14	0.545368	0.479	0.228	2.83634e-06	0.0843386	0.237763	0.303	0.381	0.230091	1	0.125833	0.395	0.398	0.776074	1	0.457242	0.465	0.376	0.0218701	1	0.178503	0.257	0.308	0.106547	1	0.00671808	0.354	0.378	0.611245	1
Nfic	0.738025	0.781	0.529	2.83809e-06	0.0843905	0.0139572	0.598	0.657	0.181236	1	0.0302949	0.656	0.657	0.929012	1	0.336843	0.807	0.735	0.00540125	1	-0.289777	0.537	0.648	0.000792879	1	-0.276833	0.605	0.65	0.127113	1
C530005A16Rik	1.22314	0.26	0.074	2.89108e-06	0.0859663	-0.335527	0.09	0.107	0.597523	1	-0.0327804	0.197	0.167	0.590298	1	0.109954	0.16	0.173	0.565994	1	0.442276	0.068	0.101	0.0524887	1	0.407237	0.182	0.156	0.339482	1
Gm20460	0.765727	0.61	0.37	2.91664e-06	0.0867264	0.0536261	0.352	0.475	0.093552	1	-0.343465	0.459	0.537	0.103625	1	-0.442539	0.468	0.544	0.0378403	1	-0.194277	0.287	0.376	0.0114542	1	-0.0231901	0.407	0.381	0.506386	1
Tsr2	0.859222	0.336	0.122	2.93288e-06	0.0872093	-0.312526	0.139	0.245	0.0184786	1	0.0360895	0.287	0.259	0.568095	1	0.400958	0.357	0.279	0.0111356	1	-0.151734	0.135	0.213	0.000969676	1	0.527357	0.249	0.252	0.914921	1
Gtf3c2	0.222838	0.644	0.339	2.95135e-06	0.0877585	0.238632	0.361	0.393	0.793592	1	0.134063	0.497	0.574	0.220584	1	0.039284	0.602	0.584	0.762318	1	-0.256992	0.283	0.351	0.0276702	1	-0.134055	0.443	0.49	0.110342	1
Tmco3	0.49075	0.568	0.307	2.95329e-06	0.0878161	0.279796	0.328	0.365	0.605387	1	0.151668	0.439	0.444	0.792583	1	0.189675	0.513	0.471	0.193047	1	0.0704066	0.257	0.299	0.344474	1	0.231972	0.474	0.439	0.247628	1
Flnb	0.440554	0.74	0.519	3.00334e-06	0.0893042	0.303708	0.533	0.544	0.991563	1	-0.0450957	0.637	0.62	0.473699	1	0.280101	0.74	0.686	0.0264743	1	-0.21497	0.428	0.507	0.0150699	1	-0.100967	0.562	0.531	0.613853	1
Tcf7l2	0.392946	0.603	0.333	3.04749e-06	0.0906172	-0.407049	0.385	0.406	0.978117	1	-0.583268	0.503	0.685	0.00220465	1	-0.241328	0.617	0.549	0.0366455	1	-0.385545	0.255	0.399	2.08729e-06	0.0620657	-0.458377	0.529	0.585	0.0529702	1
Arhgef11	0.891756	0.39	0.159	3.06604e-06	0.0911687	0.44265	0.098	0.192	0.0284889	1	0.383918	0.172	0.139	0.508788	1	-0.500352	0.297	0.303	0.743209	1	-0.186375	0.101	0.139	0.0608866	1	-0.177347	0.194	0.177	0.740479	1
Usp5	0.387593	0.61	0.333	3.06654e-06	0.0911835	0.292424	0.467	0.487	0.791417	1	-0.394755	0.478	0.5	0.279555	1	0.105727	0.639	0.608	0.299337	1	-0.151619	0.39	0.488	0.00209529	1	0.014032	0.512	0.497	0.55291	1
Rmdn1	-0.312636	0.555	0.275	3.07162e-06	0.0913346	-0.420345	0.303	0.393	0.0541875	1	-0.516315	0.363	0.778	8.75012e-12	2.60185e-07	0.325165	0.647	0.454	1.49728e-06	0.0445216	-0.280579	0.242	0.387	9.65434e-07	0.0287072	-0.586701	0.443	0.735	1.30507e-13	3.88062e-09
Ddx39	0.460526	0.986	0.852	3.12985e-06	0.0930661	0.394877	0.959	0.931	9.84652e-05	1	0.222035	0.943	0.926	0.0537231	1	-0.088484	0.881	0.854	0.26461	1	0.201198	0.788	0.778	0.00770196	1	0.073484	0.754	0.796	0.169785	1
H2-K1	-0.449002	1	1	3.138e-06	0.0933083	0.125355	1	1	0.00501609	1	0.243296	1	1	0.0410536	1	-0.188286	1	1	0.000676204	1	0.0967015	1	1	0.00036739	1	0.229919	1	1	1.29331e-09	3.84567e-05
Spryd3	0.179339	0.575	0.302	3.18986e-06	0.0948506	-0.388053	0.393	0.393	0.928438	1	-0.468327	0.408	0.463	0.141118	1	0.328046	0.606	0.529	0.0377814	1	0.15483	0.379	0.393	0.905705	1	-0.270262	0.452	0.527	0.0996284	1
Sdhaf4	-0.01654	0.349	0.116	3.19535e-06	0.0950139	-0.0560406	0.221	0.258	0.392037	1	-0.313743	0.287	0.352	0.190767	1	0.397844	0.368	0.285	0.0134398	1	-0.48605	0.161	0.182	0.262449	1	-0.590874	0.344	0.429	0.034154	1
Dohh	0.0466668	0.5	0.222	3.22212e-06	0.0958099	0.4115	0.369	0.406	0.714885	1	-0.119509	0.376	0.324	0.483328	1	-0.0805445	0.45	0.504	0.140951	1	0.0497308	0.366	0.409	0.161126	1	0.331728	0.452	0.388	0.0355143	1
Gm37780	0.12268	0.199	0.037	3.24326e-06	0.0964383	-0.695007	0.057	0.072	0.554959	1	-0.033516	0.057	0.093	0.289404	1	-0.185966	0.156	0.113	0.1138	1	-0.567842	0.032	0.057	0.0464375	1	0.658021	0.062	0.031	0.0572867	1
2810403D21Rik	-0.392846	0.404	0.164	3.26702e-06	0.0971448	-0.373561	0.172	0.236	0.137929	1	-0.0589372	0.236	0.389	0.00867417	1	0.397163	0.413	0.283	0.000946899	1	0.00708783	0.173	0.211	0.118017	1	-0.397463	0.201	0.531	2.53948e-18	7.55114e-14
Bbs9	0.272189	0.363	0.132	3.28474e-06	0.0976717	-0.709209	0.115	0.186	0.0788443	1	-0.166624	0.274	0.306	0.498171	1	0.790693	0.227	0.215	0.663223	1	0.01349	0.152	0.156	0.902986	1	-0.281377	0.184	0.259	0.0139294	1
Rprd1b	-0.0921396	0.849	0.571	3.30069e-06	0.0981462	0.119202	0.689	0.679	0.362123	1	0.349591	0.847	0.778	0.23205	1	0.0381586	0.903	0.794	0.000239234	1	0.270947	0.801	0.777	3.46257e-06	0.10296	-0.21113	0.849	0.891	2.65701e-05	0.790061
Nras	0.496357	0.788	0.556	3.32505e-06	0.0988702	-0.068763	0.443	0.566	0.0318653	1	-0.182801	0.675	0.824	0.0154435	1	0.0656831	0.766	0.701	0.0251522	1	-1.00909	0.308	0.479	2.38457e-10	7.09052e-06	0.0727381	0.727	0.827	0.0415942	1
Phb2	0.241486	0.774	0.466	3.32647e-06	0.0989125	-0.206885	0.566	0.654	0.0684596	1	-0.156724	0.599	0.639	0.237665	1	-0.224912	0.755	0.761	0.0186756	1	-0.090614	0.493	0.603	0.0088963	1	0.0320589	0.672	0.694	0.991445	1
Trit1	0.637553	0.164	0.021	3.33097e-06	0.0990464	-0.67807	0.066	0.097	0.297313	1	-0.395725	0.07	0.065	0.856076	1	-0.794242	0.123	0.133	0.516271	1	0.310516	0.043	0.048	0.711343	1	0.902093	0.11	0.088	0.306902	1
Fpgs	0.883334	0.76	0.508	3.3325e-06	0.0990919	0.0875432	0.787	0.686	0.0175842	1	-0.0853639	0.688	0.815	0.0258058	1	0.272056	0.703	0.593	0.0290964	1	0.5847	0.642	0.533	8.73505e-06	0.259737	0.233903	0.612	0.673	0.0237366	1
Actr1b	0.227136	0.664	0.429	3.33401e-06	0.0991367	0.444998	0.623	0.632	0.266542	1	0.0782773	0.631	0.722	0.0934206	1	0.0907937	0.665	0.67	0.979417	1	-0.00793905	0.507	0.582	0.0244239	1	0.0355704	0.589	0.575	0.648981	1
Sox18	0.346733	1	0.995	3.35295e-06	0.0997	0.2871	0.992	1	9.91596e-06	0.294851	-0.087374	1	1	0.0963254	1	0.0428448	1	0.991	0.169763	1	0.356895	0.992	0.998	3.78375e-16	1.1251e-11	0.0562205	0.998	0.993	0.490895	1
Fam120a	0.650051	0.562	0.296	3.37393e-06	0.100324	-0.212248	0.238	0.355	0.021803	1	0.410188	0.408	0.472	0.535158	1	-0.252567	0.535	0.546	0.925032	1	-0.13825	0.205	0.287	0.00221354	1	-0.202038	0.423	0.5	0.0270862	1
Gpcpd1	0.371837	0.37	0.148	3.3765e-06	0.1004	-0.181171	0.139	0.17	0.448581	1	-0.541212	0.153	0.324	0.000718621	1	-0.297101	0.342	0.316	0.989021	1	0.345696	0.098	0.129	0.120431	1	-1.0062	0.172	0.316	3.96873e-06	0.11801
Fhl3	0.384376	0.486	0.238	3.38924e-06	0.100779	0.123211	0.336	0.39	0.415381	1	-0.39783	0.338	0.25	0.18076	1	-0.243645	0.539	0.312	7.21222e-09	0.000214455	-0.212149	0.266	0.405	1.99441e-06	0.0593038	0.113507	0.352	0.289	0.0811441	1
Bcas3	0.719339	0.459	0.217	3.40675e-06	0.1013	-1.32728	0.279	0.302	0.388402	1	-0.0614685	0.331	0.398	0.110247	1	0.466668	0.494	0.347	5.05352e-05	1	0.433179	0.265	0.277	0.92163	1	-0.178619	0.34	0.391	0.0922989	1
Trim6	1.71874	0.39	0.175	3.40854e-06	0.101353	-0.988165	0.172	0.245	0.094551	1	-0.186475	0.197	0.389	0.000310395	1	0.246779	0.253	0.208	0.194612	1	0.304418	0.066	0.134	0.000229971	1	-0.684164	0.122	0.231	7.38948e-05	1
Fgfr1	1.79739	0.39	0.175	3.4327e-06	0.102071	-0.674562	0.205	0.23	0.558336	1	0.00896959	0.236	0.278	0.576376	1	0.228679	0.375	0.327	0.127812	1	-0.360791	0.105	0.184	0.0003478	1	-0.615226	0.242	0.323	0.0235643	1
St3gal5	0.367764	0.712	0.434	3.43384e-06	0.102105	0.539885	0.582	0.538	0.139285	1	-0.00514811	0.694	0.833	0.012379	1	0.443079	0.651	0.571	0.0140066	1	0.266651	0.426	0.43	0.793973	1	0.0530842	0.684	0.694	0.690782	1
Pofut1	0.516919	0.384	0.153	3.44324e-06	0.102385	-0.420793	0.18	0.167	0.778028	1	-0.352349	0.28	0.333	0.200481	1	0.449245	0.361	0.246	0.00129599	1	0.382048	0.165	0.223	0.0403593	1	-0.351187	0.313	0.344	0.370589	1
Slc23a2	0.0894502	0.521	0.249	3.45132e-06	0.102625	-0.048863	0.262	0.355	0.0865522	1	-0.769507	0.331	0.444	0.0331521	1	0.476809	0.528	0.442	0.0452715	1	0.497252	0.253	0.254	0.933336	1	0.107395	0.344	0.371	0.401301	1
Chmp3	0.362338	0.863	0.656	3.47621e-06	0.103365	-0.154411	0.68	0.818	0.0219329	1	0.159284	0.841	0.88	0.8741	1	-0.0854583	0.866	0.834	0.652284	1	0.165606	0.722	0.723	0.208876	1	0.0419419	0.854	0.837	0.801967	1
2810428I15Rik	0.444622	0.603	0.317	3.49274e-06	0.103857	-0.144637	0.492	0.535	0.445787	1	-0.320189	0.599	0.556	0.809185	1	-0.0559975	0.61	0.595	0.724903	1	-0.167703	0.396	0.452	0.109734	1	-0.365113	0.569	0.633	0.0553476	1
Hyal1	0.226809	0.89	0.603	3.52224e-06	0.104734	0.489397	0.672	0.635	0.0412194	1	-0.498841	0.701	0.815	0.000985296	1	0.273348	0.796	0.772	0.470183	1	0.508553	0.533	0.524	0.107807	1	-0.0431798	0.684	0.799	0.000610364	1
Tubgcp3	0.365238	0.514	0.259	3.5496e-06	0.105547	0.00462484	0.27	0.358	0.112798	1	0.122971	0.408	0.472	0.315311	1	0.0736647	0.565	0.485	0.109383	1	-0.464057	0.253	0.308	0.0297449	1	0.445433	0.433	0.398	0.275721	1
Nrbf2	0.706758	0.404	0.169	3.55423e-06	0.105685	0.000544898	0.213	0.211	0.980811	1	0.138971	0.274	0.25	0.677885	1	0.330899	0.387	0.29	0.00685581	1	-0.272418	0.184	0.191	0.657162	1	0.368186	0.297	0.282	0.625571	1
Pgd	0.643594	0.61	0.37	3.59462e-06	0.106886	0.418914	0.475	0.469	0.448283	1	0.111621	0.478	0.537	0.306836	1	-0.172448	0.565	0.611	0.0873148	1	-0.17625	0.371	0.448	0.00934571	1	-0.025506	0.469	0.378	0.0182752	1
St6galnac6	0.817737	0.349	0.132	3.6088e-06	0.107308	-0.167207	0.18	0.192	0.834289	1	-0.499639	0.217	0.343	0.0146949	1	0.467513	0.361	0.215	4.94263e-05	1	0.0228211	0.101	0.148	0.0214258	1	-0.285249	0.218	0.327	0.00130181	1
Dgkz	0.375387	0.856	0.619	3.6461e-06	0.108417	0.48141	0.787	0.714	0.00069269	1	-0.114043	0.758	0.824	0.158357	1	0.182303	0.736	0.67	0.00319239	1	0.0978215	0.582	0.601	0.835993	1	-0.0204959	0.691	0.721	0.400826	1
Mrpl51	0.141593	0.63	0.344	3.64799e-06	0.108473	0.143225	0.311	0.437	0.0967781	1	-0.20781	0.439	0.481	0.556297	1	-0.0444722	0.572	0.555	0.618486	1	-0.199713	0.28	0.354	0.0145507	1	-0.0354355	0.512	0.544	0.869819	1
Pank3	0.388207	0.342	0.127	3.66099e-06	0.10886	-1.2373	0.115	0.135	0.508642	1	0.808937	0.191	0.204	0.840586	1	0.095046	0.26	0.288	0.480573	1	0.284715	0.096	0.098	0.890204	1	0.223932	0.182	0.133	0.0928552	1
Homez	0.759293	0.205	0.042	3.66748e-06	0.109053	-0.680436	0.057	0.044	0.567014	1	-1.44058	0.07	0.102	0.323704	1	0.408197	0.197	0.155	0.11645	1	0.156398	0.075	0.058	0.288191	1	-0.27496	0.096	0.109	0.560713	1
Xylt2	0.0182545	0.479	0.222	3.72205e-06	0.110675	-0.479628	0.328	0.431	0.0372683	1	0.156407	0.382	0.435	0.451243	1	0.589397	0.487	0.465	0.206966	1	-0.547166	0.218	0.395	2.82886e-10	8.4116e-06	-0.00823697	0.4	0.432	0.448038	1
Hadh	0.284813	0.671	0.429	3.72728e-06	0.110831	-0.316742	0.533	0.651	0.00376243	1	-0.0371119	0.707	0.667	0.29419	1	0.0852378	0.684	0.657	0.697988	1	-0.0236442	0.46	0.593	6.38603e-05	1	-0.0111158	0.622	0.643	0.499898	1
Nfs1	0.245814	0.473	0.222	3.74246e-06	0.111282	0.239119	0.328	0.308	0.526895	1	0.481921	0.318	0.315	0.827154	1	-0.308776	0.398	0.467	0.0897312	1	-0.11782	0.208	0.289	0.00598612	1	-0.268123	0.323	0.361	0.368228	1
Ppp1cb	0.213823	0.699	0.423	3.77564e-06	0.112269	-0.308129	0.402	0.497	0.103966	1	-0.240498	0.58	0.676	0.0364448	1	0.232157	0.665	0.642	0.0440199	1	-0.245884	0.321	0.385	0.0249541	1	-0.516093	0.498	0.673	1.16519e-07	0.0034647
Cpne2	-0.0494648	0.555	0.275	3.79699e-06	0.112903	0.280169	0.287	0.333	0.52121	1	-0.858892	0.427	0.62	0.000337857	1	0.255578	0.517	0.522	0.92115	1	-0.0243812	0.266	0.306	0.162181	1	-0.0116216	0.49	0.592	0.00366337	1
Prss23os	0.889669	0.411	0.18	3.807e-06	0.113201	-0.135771	0.164	0.211	0.218187	1	-0.593466	0.28	0.222	0.235294	1	-0.575693	0.379	0.458	0.0108155	1	0.089132	0.152	0.223	0.0051951	1	0.09857	0.38	0.327	0.0744239	1
Fam162a	1.02384	0.466	0.228	3.85444e-06	0.114612	-0.45814	0.27	0.421	0.00431218	1	-0.780185	0.331	0.426	0.0898175	1	-0.207108	0.405	0.507	0.0192003	1	-0.405941	0.218	0.282	0.0172565	1	-0.275376	0.368	0.449	0.0526623	1
Neurl1b	0.609419	0.342	0.127	3.88917e-06	0.115645	-0.201192	0.189	0.214	0.58584	1	-0.130714	0.217	0.333	0.0380189	1	0.72629	0.342	0.237	0.00190106	1	0.549825	0.156	0.186	0.24783	1	0.0176408	0.234	0.276	0.217575	1
Rft1	0.498035	0.295	0.095	3.89254e-06	0.115745	-1.6515	0.066	0.094	0.315016	1	-1.01329	0.146	0.259	0.0239373	1	0.10082	0.309	0.204	0.00331066	1	0.564514	0.101	0.107	0.905324	1	0.221041	0.232	0.228	0.824893	1
Nol6	0.59922	0.322	0.111	3.89525e-06	0.115825	0.222787	0.164	0.22	0.196247	1	-0.265217	0.306	0.352	0.300918	1	0.382282	0.368	0.301	0.106094	1	0.0391374	0.152	0.203	0.0224065	1	0.440187	0.289	0.252	0.133946	1
Cdc37	0.28778	0.863	0.635	3.92775e-06	0.116792	-0.208867	0.738	0.881	0.00440297	1	0.167772	0.79	0.88	0.420095	1	-0.210367	0.836	0.805	0.224316	1	0.156197	0.795	0.813	0.417654	1	0.193465	0.828	0.847	0.592383	1
Ccdc90b	0.282203	0.397	0.164	3.99296e-06	0.118731	-0.555553	0.189	0.311	0.0101437	1	0.470408	0.344	0.343	0.794812	1	0.10091	0.413	0.387	0.490759	1	-0.746429	0.128	0.266	9.47007e-09	0.000281593	-0.291092	0.349	0.408	0.0679543	1
Ift122	-0.603325	0.432	0.19	3.99709e-06	0.118854	-0.725023	0.27	0.311	0.317733	1	-0.414416	0.357	0.269	0.18721	1	0.136816	0.45	0.476	0.318833	1	0.0571631	0.306	0.309	0.952502	1	0.666037	0.435	0.306	0.000174059	1
Polr2k	0.717166	0.459	0.217	4.09981e-06	0.121908	-0.435943	0.205	0.346	0.00803911	1	-0.786733	0.363	0.435	0.1018	1	0.158683	0.375	0.338	0.215558	1	-0.756984	0.212	0.337	3.0756e-06	0.0914529	-0.47109	0.388	0.456	0.0226555	1
Gclm	0.316591	0.466	0.212	4.12691e-06	0.122714	0.639473	0.328	0.308	0.473845	1	0.328891	0.376	0.343	0.526087	1	0.773518	0.468	0.327	0.000142647	1	-0.637713	0.124	0.182	0.00668877	1	0.00499287	0.404	0.384	0.861595	1
Procr	-1.24723	0.411	0.175	4.1388e-06	0.123067	0.598407	0.213	0.299	0.119246	1	0.452876	0.395	0.306	0.112382	1	0.236383	0.398	0.434	0.360224	1	-0.0570099	0.251	0.292	0.158581	1	0.0514429	0.471	0.354	0.00112915	1
Mob1a	0.25975	0.87	0.614	4.1392e-06	0.123079	0.283427	0.705	0.77	0.236569	1	-0.116717	0.694	0.741	0.320758	1	0.0723479	0.866	0.768	0.148843	1	0.0914561	0.61	0.668	0.316502	1	-0.193067	0.694	0.752	0.128169	1
Vcl	0.651539	0.63	0.376	4.18315e-06	0.124386	0.588687	0.484	0.475	0.906389	1	-0.224723	0.51	0.583	0.0452768	1	-0.0860207	0.665	0.639	0.819854	1	0.410979	0.501	0.412	0.000115007	1	0.0278643	0.541	0.52	0.547373	1
Ccny	0.245043	0.644	0.37	4.18564e-06	0.12446	0.269145	0.459	0.412	0.296638	1	-0.3506	0.522	0.537	0.372273	1	0.472942	0.569	0.549	0.245214	1	0.306099	0.371	0.407	0.603784	1	-0.0724486	0.562	0.531	0.545855	1
Vps41	-0.435202	0.616	0.323	4.19298e-06	0.124678	-0.654852	0.262	0.358	0.0478069	1	-0.734051	0.363	0.519	0.005305	1	0.391132	0.52	0.473	0.10071	1	0.226713	0.24	0.351	0.000172723	1	-0.195166	0.476	0.449	0.288826	1
Dip2b	0.46427	0.575	0.307	4.2198e-06	0.125476	-0.0818802	0.377	0.314	0.392928	1	0.135193	0.439	0.454	0.741049	1	-0.194922	0.509	0.469	0.218014	1	0.235628	0.236	0.218	0.403922	1	-0.168117	0.354	0.405	0.0839175	1
1700052K11Rik	0.499439	0.219	0.048	4.23517e-06	0.125933	-0.116566	0.033	0.085	0.0599548	1	-1.33251	0.076	0.12	0.184039	1	0.418856	0.182	0.19	0.63975	1	-0.211369	0.051	0.062	0.426914	1	0.114599	0.108	0.109	0.944997	1
Tspan14	0.155423	0.966	0.725	4.26927e-06	0.126947	0.33422	0.91	0.95	0.0252469	1	0.252784	0.949	0.935	0.0529279	1	0.415028	0.926	0.816	9.02776e-07	0.026844	0.0267526	0.844	0.88	0.887112	1	-0.100273	0.885	0.905	0.0501506	1
Lace1	0.887161	0.404	0.18	4.32917e-06	0.128728	0.0634579	0.246	0.248	0.872253	1	0.784868	0.287	0.25	0.450382	1	-0.648408	0.42	0.46	0.145239	1	-0.294812	0.21	0.265	0.0249963	1	0.120713	0.337	0.299	0.416086	1
Ppapdc3	0.166856	0.123	0.005	4.35906e-06	0.129617	-0.0466242	0.025	0.016	0.538432	1	-0.0436108	0.032	0.056	0.341579	1	1.49554	0.097	0.033	0.000358687	1	-0.223627	0.017	0.021	0.63211	1	-0.555196	0.053	0.085	0.0857339	1
Raver1	0.463061	0.589	0.328	4.39182e-06	0.130591	0.166605	0.402	0.484	0.405424	1	0.717767	0.554	0.5	0.456491	1	-0.06666	0.546	0.538	0.898004	1	0.306158	0.443	0.457	0.924548	1	0.060993	0.522	0.565	0.204531	1
Zfp414	0.448746	0.411	0.175	4.4046e-06	0.130971	0.363027	0.303	0.305	0.975396	1	-0.294081	0.306	0.426	0.0183506	1	-0.120518	0.416	0.449	0.187905	1	-0.332943	0.238	0.246	0.809415	1	0.292021	0.4	0.412	0.896894	1
Pisd-ps1	0.719146	0.521	0.28	4.40597e-06	0.131011	0.5348	0.5	0.428	0.0815528	1	-0.0405522	0.497	0.63	0.0734642	1	0.567559	0.55	0.347	3.18855e-08	0.000948115	0.0816194	0.332	0.364	0.535536	1	0.31827	0.488	0.435	0.122149	1
Spns1	0.313144	0.589	0.323	4.41207e-06	0.131193	0.255018	0.434	0.481	0.763607	1	0.640514	0.452	0.417	0.418765	1	0.0968362	0.565	0.564	0.977212	1	0.449409	0.469	0.381	0.000560388	1	0.13675	0.414	0.459	0.215465	1
Ppp1r16a	0.597063	0.308	0.106	4.42895e-06	0.131695	-0.57607	0.172	0.211	0.367939	1	-1.10801	0.185	0.241	0.199493	1	0.591939	0.335	0.204	0.000183673	1	-0.307412	0.143	0.218	0.0021457	1	-1.01651	0.251	0.214	0.285295	1
Sin3b	0.347097	0.774	0.503	4.47341e-06	0.133017	-0.211781	0.631	0.701	0.170497	1	-0.210432	0.707	0.667	0.578529	1	-0.132215	0.77	0.748	0.923597	1	-0.122734	0.565	0.684	0.00423067	1	-0.280094	0.689	0.759	0.0375761	1
Exoc5	0.354759	0.616	0.328	4.50249e-06	0.133882	0.0137856	0.352	0.387	0.607604	1	0.0796603	0.459	0.5	0.534226	1	0.425234	0.599	0.507	0.0157921	1	0.0689144	0.302	0.311	0.838038	1	-0.0521895	0.462	0.48	0.682292	1
Tox2	0.495112	0.445	0.19	4.51374e-06	0.134216	0.144242	0.27	0.352	0.168757	1	-0.0414182	0.389	0.509	0.0999669	1	0.252564	0.327	0.332	0.53814	1	-0.0250758	0.053	0.119	9.55042e-05	1	1.38096	0.172	0.133	0.111832	1
Chtf8	0.250754	0.719	0.439	4.53163e-06	0.134748	0.247859	0.68	0.645	0.263618	1	0.556791	0.732	0.694	0.0727648	1	0.027647	0.714	0.701	0.86219	1	-0.044148	0.651	0.66	0.661732	1	0.141538	0.699	0.656	0.433351	1
Cmpk1	0.520289	0.692	0.481	4.53445e-06	0.134832	-0.268909	0.426	0.535	0.0471331	1	0.24704	0.529	0.62	0.29322	1	-0.078412	0.665	0.666	0.888369	1	-0.291782	0.304	0.45	4.75561e-06	0.141408	0.18039	0.55	0.551	0.82477	1
Pqlc3	0.338794	0.288	0.09	4.54593e-06	0.135173	-0.167609	0.066	0.085	0.524573	1	0.253149	0.102	0.056	0.180899	1	-0.292125	0.249	0.279	0.189014	1	-0.619739	0.045	0.096	0.000902503	1	0.199128	0.098	0.088	0.647153	1
Tpp1	0.191831	0.863	0.64	4.56493e-06	0.135738	0.0540006	0.73	0.761	0.999663	1	0.00131044	0.745	0.88	0.0677234	1	-0.0159037	0.807	0.819	0.788424	1	-0.193504	0.568	0.698	7.5517e-05	1	0.2929	0.825	0.724	0.00309096	1
Ganc	0.728063	0.623	0.354	4.58358e-06	0.136293	-0.705034	0.467	0.478	0.232484	1	-0.662713	0.535	0.694	0.0095138	1	0.307857	0.688	0.515	8.45386e-06	0.251376	0.170907	0.296	0.366	0.0382965	1	-0.0667446	0.49	0.609	0.0139859	1
Pigs	0.53908	0.582	0.328	4.61523e-06	0.137234	0.58522	0.459	0.374	0.0454685	1	-0.344103	0.439	0.556	0.0477765	1	-0.160916	0.558	0.511	0.375672	1	0.656626	0.448	0.345	4.10248e-05	1	-0.439895	0.502	0.517	0.517045	1
Cltc	0.0622462	0.849	0.619	4.63909e-06	0.137943	0.154288	0.615	0.594	0.478348	1	-0.0963623	0.72	0.843	0.000691042	1	0.167248	0.803	0.743	3.39356e-05	1	0.237375	0.527	0.565	0.973412	1	0.372903	0.679	0.793	0.0156854	1
Nr1d1	0.285948	0.959	0.757	4.64378e-06	0.138083	0.35224	0.852	0.865	0.0194511	1	-0.438693	0.828	0.963	5.23091e-06	0.155541	0.600405	0.959	0.799	1.28473e-11	3.82013e-07	0.698194	0.839	0.686	1.50723e-13	4.48175e-09	-0.47322	0.847	0.929	1.59855e-14	4.75329e-10
Krcc1	0.200484	0.637	0.365	4.6721e-06	0.138925	-0.213022	0.385	0.497	0.0256883	1	-0.343624	0.452	0.565	0.0269672	1	0.321272	0.665	0.597	0.00444127	1	-0.379984	0.283	0.4	4.06634e-05	1	-0.1617	0.483	0.585	0.0220476	1
2410089E03Rik	0.966543	0.322	0.116	4.71833e-06	0.1403	0.193946	0.148	0.113	0.344374	1	0.243502	0.204	0.194	0.93301	1	0.62508	0.297	0.239	0.0673	1	0.186244	0.148	0.153	0.930035	1	0.125473	0.144	0.207	0.0422177	1
Naa35	0.734716	0.479	0.238	4.73557e-06	0.140812	-0.284309	0.287	0.299	0.841136	1	-0.0245573	0.268	0.287	0.591495	1	0.231936	0.401	0.456	0.364865	1	-0.29691	0.206	0.259	0.0518186	1	0.0424124	0.385	0.327	0.108484	1
Emid1	-0.362317	0.658	0.344	4.74917e-06	0.141216	-0.799204	0.369	0.478	0.0190671	1	0.31662	0.414	0.417	0.913588	1	0.285033	0.625	0.571	0.303238	1	0.352955	0.388	0.44	0.362424	1	-0.184131	0.431	0.412	0.558033	1
Fbxo3	0.185089	0.671	0.407	4.74927e-06	0.14122	-0.0218804	0.434	0.478	0.427393	1	0.0549253	0.611	0.648	0.661304	1	0.280786	0.669	0.619	0.0753452	1	0.0957481	0.319	0.443	0.000298938	1	0.335594	0.598	0.517	0.0115685	1
Rgs12	0.557293	0.452	0.222	4.79964e-06	0.142717	0.305278	0.279	0.252	0.423252	1	-0.0511852	0.268	0.296	0.525984	1	0.471818	0.45	0.374	0.0104383	1	0.0358028	0.199	0.215	0.613585	1	0.137101	0.4	0.361	0.280902	1
Rab11fip5	0.303866	0.219	0.053	4.80264e-06	0.142807	1.24551	0.057	0.094	0.193966	1	0.20034	0.096	0.083	0.702678	1	0.854312	0.264	0.221	0.172514	1	-0.0434421	0.081	0.095	0.401596	1	0.504704	0.151	0.088	0.012144	1
Fgfr1op2	0.158691	0.726	0.423	4.81443e-06	0.143157	-0.308062	0.369	0.503	0.00481093	1	-0.267257	0.541	0.602	0.222617	1	0.295901	0.71	0.644	0.0294935	1	-0.161462	0.351	0.43	0.00767042	1	0.165983	0.615	0.656	0.922877	1
Chpf2	0.0807826	0.616	0.354	4.848e-06	0.144155	0.532041	0.492	0.456	0.207231	1	-0.71745	0.567	0.657	0.00667473	1	0.43626	0.554	0.553	0.894449	1	0.236316	0.507	0.457	0.0535737	1	-0.0976607	0.519	0.639	0.000262602	1
Hk1	0.158204	0.623	0.317	4.85253e-06	0.14429	0.478937	0.5	0.418	0.0615352	1	0.267882	0.643	0.667	0.667859	1	0.647589	0.61	0.518	0.0022513	1	-0.0689997	0.388	0.471	0.0275261	1	-0.0244916	0.6	0.68	0.069796	1
Hmgb3	0.543224	0.288	0.09	4.85373e-06	0.144326	-0.424298	0.057	0.204	0.000390163	1	0.225994	0.166	0.176	0.732618	1	0.344567	0.245	0.232	0.581414	1	-0.676299	0.06	0.143	8.11875e-06	0.241411	-0.169614	0.208	0.16	0.12051	1
Flii	0.177626	0.774	0.508	4.96459e-06	0.147622	0.334565	0.615	0.635	0.778307	1	0.440954	0.758	0.731	0.474905	1	-0.0683943	0.773	0.723	0.77613	1	0.11434	0.552	0.601	0.187545	1	-0.0212151	0.737	0.704	0.621351	1
Gramd4	0.155043	0.212	0.048	5.00535e-06	0.148834	-0.0687206	0.066	0.079	0.574055	1	-0.92229	0.051	0.13	0.0196278	1	1.82361	0.257	0.073	1.03563e-11	3.07944e-07	0.107615	0.096	0.098	0.998697	1	0.145472	0.136	0.167	0.269924	1
Zfp715	0.43666	0.664	0.386	5.0172e-06	0.149186	0.377168	0.443	0.393	0.197273	1	-0.0618044	0.465	0.5	0.457084	1	0.0759458	0.546	0.515	0.466249	1	0.246354	0.295	0.289	0.663387	1	0.103108	0.467	0.442	0.268494	1
Sulf1	-1.06945	0.329	0.116	5.03359e-06	0.149674	0.313233	0.074	0.148	0.0307084	1	-1.55907	0.197	0.157	0.546094	1	0.728424	0.286	0.261	0.439166	1	-0.242924	0.088	0.163	0.000229681	1	0.57119	0.249	0.15	0.00158403	1
Ccdc86	0.629683	0.425	0.19	5.04203e-06	0.149925	-0.289332	0.197	0.286	0.0500972	1	0.0581765	0.306	0.324	0.530739	1	-0.413781	0.338	0.387	0.0732917	1	-0.0959655	0.15	0.203	0.0333663	1	-0.0507547	0.258	0.245	0.941458	1
Pcsk5	0.000278476	0.575	0.323	5.07543e-06	0.150918	-0.601961	0.279	0.553	2.37341e-06	0.0705734	0.399181	0.49	0.509	0.908994	1	0.604559	0.554	0.46	0.00400027	1	-0.380307	0.163	0.402	1.99598e-17	5.93505e-13	-0.0297484	0.505	0.361	0.000379332	1
Zfp212	0.672443	0.452	0.212	5.15446e-06	0.153268	-0.346044	0.213	0.343	0.00735864	1	-0.0439167	0.312	0.315	0.786554	1	-0.158974	0.454	0.469	0.392713	1	0.29296	0.186	0.263	0.00330942	1	0.0210974	0.289	0.276	0.63306	1
Zfp445	0.228442	0.39	0.153	5.17348e-06	0.153833	-1.05229	0.139	0.226	0.0305178	1	-0.158242	0.255	0.324	0.268552	1	0.29911	0.323	0.208	0.000735289	1	-0.188206	0.081	0.146	0.000812996	1	-0.256056	0.189	0.231	0.146318	1
Tmem71	0.114444	0.37	0.148	5.17626e-06	0.153916	-0.0703933	0.213	0.233	0.777609	1	-0.450951	0.236	0.352	0.0437191	1	0.127599	0.357	0.303	0.131428	1	-0.0657215	0.15	0.16	0.740681	1	-0.942431	0.275	0.367	0.00441923	1
Gbe1	0.504206	0.301	0.101	5.19544e-06	0.154486	-0.0226756	0.148	0.179	0.386421	1	-0.0480854	0.172	0.139	0.552504	1	0.0544788	0.346	0.188	2.44966e-06	0.0728405	0.0588296	0.135	0.136	0.942853	1	0.0699122	0.249	0.163	0.0062303	1
Gm20512	0.869368	0.397	0.175	5.19569e-06	0.154494	0.0138371	0.287	0.286	0.961489	1	-0.0276423	0.261	0.324	0.35623	1	0.208267	0.42	0.323	0.00359435	1	-0.0833762	0.259	0.299	0.134677	1	0.152745	0.335	0.327	0.633939	1
Rabep2	0.53517	0.466	0.217	5.22036e-06	0.155227	0.0711931	0.336	0.355	0.546003	1	-0.271933	0.357	0.38	0.676253	1	0.275439	0.45	0.44	0.942828	1	0.10413	0.332	0.352	0.782513	1	0.16597	0.411	0.367	0.181275	1
Gm37350	0.813727	0.322	0.116	5.25356e-06	0.156215	0.318134	0.295	0.236	0.166079	1	-1.26407	0.191	0.454	8.80924e-07	0.0261943	0.107248	0.164	0.095	0.00706502	1	-0.210809	0.068	0.093	0.123342	1	0.0590198	0.144	0.143	0.869005	1
Sgsm3.1	0.215852	0.466	0.212	5.25927e-06	0.156385	0.418623	0.344	0.27	0.181942	1	0.322068	0.376	0.306	0.262594	1	0.397124	0.48	0.431	0.208549	1	0.387802	0.362	0.285	0.0054564	1	-0.0813588	0.39	0.395	0.702545	1
Fam65b	0.664265	0.493	0.238	5.34939e-06	0.159064	-0.202402	0.279	0.384	0.0527579	1	-0.508592	0.28	0.407	0.0167758	1	0.36166	0.424	0.319	0.0039907	1	-0.372329	0.174	0.266	0.000402414	1	0.151049	0.261	0.306	0.251516	1
Tead2	0.51415	0.411	0.169	5.38024e-06	0.159981	-0.331208	0.295	0.314	0.576811	1	0.684469	0.376	0.37	0.536002	1	0.412775	0.401	0.341	0.0545746	1	0.35462	0.25	0.21	0.0722854	1	0.308637	0.321	0.228	0.00659146	1
Ankrd46	0.203575	0.747	0.492	5.38782e-06	0.160207	0.688286	0.484	0.547	0.999647	1	0.184616	0.605	0.648	0.721601	1	-0.0652243	0.68	0.666	0.815296	1	0.05395	0.463	0.503	0.131467	1	0.0527802	0.644	0.656	0.917433	1
Svil	0.171723	0.575	0.296	5.39364e-06	0.16038	0.577825	0.459	0.349	0.0192916	1	-0.589448	0.408	0.593	0.00192205	1	-0.0464569	0.424	0.451	0.596067	1	0.247036	0.274	0.261	0.469974	1	0.125745	0.409	0.432	0.671853	1
Fiz1	0.0438013	0.473	0.217	5.45352e-06	0.16216	-0.295995	0.221	0.292	0.137521	1	0.138671	0.293	0.213	0.162964	1	-0.0611394	0.428	0.312	0.00453794	1	-0.0930022	0.165	0.259	0.000176706	1	0.384617	0.304	0.238	0.0435258	1
Nisch	0.216941	0.911	0.762	5.48326e-06	0.163045	0.112165	0.803	0.887	0.465929	1	0.121743	0.841	0.935	0.163254	1	0.223577	0.926	0.876	1.57626e-05	0.4687	0.262499	0.79	0.821	0.498231	1	-0.00712583	0.885	0.908	0.021848	1
D230025D16Rik	0.278813	0.432	0.19	5.4875e-06	0.163171	0.489997	0.246	0.264	0.644399	1	-0.0275221	0.293	0.333	0.528447	1	0.162435	0.394	0.416	0.644307	1	0.141692	0.18	0.215	0.18331	1	-0.109364	0.33	0.333	0.789352	1
Agrn	-0.177246	0.644	0.365	5.50485e-06	0.163687	-0.164926	0.402	0.456	0.16841	1	-0.50166	0.484	0.546	0.32643	1	0.376428	0.688	0.56	0.00124204	1	0.0249998	0.371	0.44	0.0292989	1	-0.0716057	0.464	0.473	0.442699	1
Pon2	0.279716	0.884	0.651	5.52469e-06	0.164277	0.103969	0.795	0.811	0.332694	1	-0.202393	0.847	0.88	0.0311457	1	-0.077232	0.851	0.843	0.754712	1	0.157004	0.689	0.729	0.888091	1	0.446769	0.883	0.84	0.004376	1
Rnf11	1.10376	0.397	0.18	5.64521e-06	0.16786	-0.821023	0.172	0.255	0.035334	1	0.377841	0.217	0.296	0.172196	1	0.304935	0.428	0.376	0.21628	1	0.00744318	0.124	0.201	0.000653081	1	-0.422836	0.206	0.296	0.00985529	1
Msx1	0.369302	0.596	0.317	5.6541e-06	0.168125	-0.459706	0.336	0.447	0.0172459	1	0.602614	0.471	0.472	0.561108	1	-0.296701	0.498	0.493	0.877237	1	0.0785548	0.214	0.332	6.84328e-05	1	-0.35666	0.428	0.452	0.70254	1
Pxdc1	1.17644	0.356	0.143	5.67027e-06	0.168605	0.551245	0.32	0.201	0.00469039	1	-1.56504	0.382	0.648	3.80622e-06	0.113178	0.363033	0.439	0.363	0.0687609	1	0.0705957	0.186	0.237	0.0686571	1	-0.813534	0.548	0.633	0.0031315	1
Pip4k2a	0.197811	0.534	0.265	5.68739e-06	0.169115	0.639059	0.369	0.324	0.282308	1	-0.362078	0.331	0.472	0.0110743	1	0.235478	0.45	0.369	0.0107089	1	-0.330477	0.191	0.223	0.173828	1	-0.757586	0.266	0.405	6.04103e-05	1
Zdhhc5	0.0949576	0.432	0.185	5.69112e-06	0.169226	0.908644	0.287	0.22	0.104586	1	-0.450748	0.223	0.287	0.235274	1	0.213004	0.349	0.301	0.198844	1	0.270446	0.206	0.184	0.400155	1	-0.327518	0.242	0.313	0.0296263	1
Klhl24	0.58894	0.678	0.434	5.74983e-06	0.170971	-0.261024	0.361	0.478	0.0643587	1	-0.101865	0.643	0.657	0.520325	1	0.479133	0.706	0.586	0.000470449	1	-0.0191264	0.304	0.38	0.0203275	1	-0.398629	0.555	0.667	4.29262e-05	1
Cdc25b	0.104893	0.37	0.148	5.76318e-06	0.171368	0.3675	0.172	0.173	0.989855	1	0.582894	0.166	0.213	0.389788	1	0.406414	0.327	0.204	0.000199187	1	1.13101	0.171	0.124	0.0136785	1	-0.931199	0.153	0.177	0.323203	1
Bahcc1	0.698328	0.438	0.19	5.76674e-06	0.171474	0.294289	0.27	0.299	0.838676	1	0.468225	0.325	0.296	0.560403	1	0.28973	0.316	0.274	0.314525	1	0.526467	0.113	0.162	0.0246087	1	-0.511708	0.208	0.269	0.0480104	1
Ssbp1	0.338615	0.411	0.175	5.79694e-06	0.172372	-0.42601	0.303	0.336	0.328534	1	-0.436613	0.344	0.38	0.428981	1	-0.257251	0.364	0.392	0.342518	1	-0.55838	0.205	0.306	0.000148776	1	-0.377714	0.397	0.429	0.412178	1
Cstf2t	-0.086908	0.534	0.254	5.80167e-06	0.172513	-0.0220979	0.238	0.302	0.251042	1	0.331533	0.28	0.389	0.0953371	1	0.54453	0.52	0.376	0.000317498	1	0.0557621	0.173	0.216	0.0846841	1	-0.188779	0.366	0.357	0.827429	1
Timm8b	0.415678	0.384	0.153	5.87546e-06	0.174707	-0.371726	0.238	0.349	0.0200935	1	-0.360629	0.369	0.417	0.590215	1	-0.0520281	0.416	0.412	0.839135	1	-0.614737	0.201	0.282	0.000760968	1	-0.12195	0.419	0.446	0.591172	1
Idh3a	0.591266	0.534	0.312	5.88214e-06	0.174906	0.26709	0.434	0.349	0.0726705	1	0.953652	0.478	0.361	0.0203935	1	0.00733958	0.539	0.504	0.839371	1	0.0468243	0.311	0.359	0.187372	1	0.663985	0.469	0.286	1.01994e-06	0.0303279
Frmd4b	0.0721737	0.658	0.381	5.8834e-06	0.174943	0.434201	0.41	0.45	0.508944	1	-0.227563	0.516	0.528	0.385875	1	0.158014	0.721	0.633	0.0450942	1	0.159384	0.37	0.455	0.0158986	1	-0.164768	0.478	0.541	0.19082	1
Brf1	0.286986	0.438	0.201	5.8999e-06	0.175434	-0.17918	0.238	0.384	0.00539594	1	0.668566	0.369	0.38	0.914743	1	-0.210639	0.424	0.403	0.670702	1	0.0356726	0.229	0.302	0.0179711	1	0.0344848	0.414	0.367	0.275116	1
Vopp1	-0.0443294	0.596	0.328	5.90203e-06	0.175497	0.176551	0.361	0.434	0.193439	1	-0.301957	0.497	0.528	0.279995	1	-0.045561	0.602	0.608	0.682791	1	-0.0486318	0.311	0.371	0.0626784	1	-0.0114138	0.462	0.48	0.973748	1
Ythdf1	0.364689	0.37	0.143	5.94892e-06	0.176891	0.173247	0.303	0.258	0.37673	1	-0.109882	0.28	0.306	0.567581	1	-0.395293	0.309	0.418	0.00099942	1	-0.087996	0.128	0.22	7.53564e-05	1	0.0199847	0.309	0.289	0.577449	1
Alkbh4	0.0115645	0.205	0.042	5.95044e-06	0.176936	-0.564971	0.123	0.164	0.245704	1	-0.0928265	0.153	0.13	0.617687	1	0.852207	0.182	0.133	0.0693446	1	0.0843705	0.098	0.122	0.231116	1	0.149122	0.194	0.204	0.9096	1
Rarg	0.220565	0.842	0.556	6.12661e-06	0.182175	0.0386093	0.721	0.827	0.40438	1	-0.354956	0.732	0.88	0.00311038	1	0.169197	0.836	0.717	0.0437645	1	-0.259779	0.625	0.763	1.83831e-05	0.546622	-0.411796	0.648	0.81	9.72901e-07	0.0289292
Plscr3	0.247942	0.822	0.593	6.19736e-06	0.184278	0.0983542	0.689	0.714	0.915895	1	-0.107083	0.745	0.759	0.655372	1	-0.236576	0.818	0.803	0.507078	1	-0.124342	0.64	0.741	0.000936931	1	0.124682	0.78	0.755	0.242554	1
Heph	1.29275	0.288	0.095	6.19847e-06	0.184312	0.797039	0.189	0.148	0.324516	1	-0.915268	0.217	0.213	0.97284	1	0.538494	0.349	0.274	0.0209154	1	0.337839	0.182	0.158	0.270729	1	0.0771006	0.249	0.282	0.285792	1
RP23-167H23.2	0.44882	0.219	0.058	6.21488e-06	0.184799	-0.0662394	0.123	0.148	0.50371	1	-0.596369	0.14	0.25	0.018959	1	0.0321671	0.175	0.115	0.03048	1	-0.0369958	0.047	0.074	0.0637232	1	-0.10907	0.127	0.201	0.0103562	1
Pvrl2	0.0837718	0.856	0.614	6.21524e-06	0.18481	0.385011	0.754	0.708	0.176409	1	-0.0151716	0.707	0.778	0.143523	1	0.460453	0.877	0.785	2.97519e-08	0.000884674	0.223875	0.777	0.732	0.0129298	1	-0.185688	0.775	0.782	0.14338	1
Dedd2	0.0668322	0.308	0.101	6.28516e-06	0.186889	-1.01363	0.148	0.211	0.102234	1	0.132163	0.191	0.25	0.262179	1	-0.865046	0.219	0.29	0.0217561	1	0.187963	0.15	0.211	0.0116323	1	-0.371525	0.158	0.231	0.0150807	1
Gtf3c3	0.418401	0.322	0.111	6.28673e-06	0.186936	0.718665	0.18	0.151	0.405421	1	0.0314679	0.146	0.204	0.201232	1	-0.0288488	0.216	0.228	0.730574	1	0.328014	0.111	0.125	0.475659	1	-0.434958	0.16	0.207	0.147842	1
Med6	0.0566169	0.5	0.238	6.29821e-06	0.187277	-0.210321	0.205	0.336	0.0120128	1	-0.716448	0.299	0.454	0.00395336	1	-0.419784	0.517	0.5	0.665272	1	-0.140971	0.148	0.244	0.0001969	1	-0.36183	0.356	0.432	0.0470931	1
Stard3	0.296622	0.61	0.333	6.30645e-06	0.187522	0.235967	0.41	0.387	0.73404	1	0.0949826	0.459	0.417	0.71558	1	-0.0645412	0.52	0.586	0.0148708	1	0.211779	0.343	0.308	0.108234	1	0.451103	0.486	0.35	0.000141998	1
Phf14	1.53627	0.336	0.132	6.32085e-06	0.187951	0.132154	0.18	0.255	0.110669	1	-0.31569	0.236	0.361	0.0372333	1	-0.06152	0.283	0.265	0.478045	1	-0.0309944	0.15	0.203	0.0290985	1	-0.685301	0.201	0.279	0.014687	1
B2m	-0.245865	1	1	6.33718e-06	0.188436	-0.168117	1	1	0.0003122	1	-0.188763	1	1	8.63103e-06	0.256644	-0.284465	1	1	1.67954e-14	4.99412e-10	-0.184628	1	1	2.5419e-11	7.55833e-07	-0.118891	1	1	3.6558e-07	0.0108705
Ddx54	0.44672	0.678	0.423	6.40223e-06	0.19037	0.0776797	0.443	0.626	0.00354589	1	0.21692	0.516	0.565	0.649276	1	0.160479	0.654	0.633	0.584974	1	-0.0267727	0.475	0.533	0.16676	1	0.155326	0.557	0.483	0.0379484	1
Parg	0.324219	0.342	0.127	6.415e-06	0.19075	0.135542	0.164	0.167	0.991233	1	0.473877	0.268	0.157	0.037439	1	0.549468	0.368	0.316	0.137565	1	-0.407134	0.113	0.17	0.00680527	1	-0.0829092	0.215	0.15	0.0333241	1
Rbm17	0.273972	0.623	0.36	6.42992e-06	0.191194	0.126335	0.336	0.406	0.241636	1	-0.342887	0.459	0.565	0.0425516	1	-0.0267813	0.587	0.624	0.344592	1	-0.297406	0.323	0.421	0.00127482	1	-0.329587	0.495	0.544	0.175844	1
Slc35b1	0.426087	0.63	0.392	6.46611e-06	0.19227	0.172832	0.459	0.522	0.792426	1	0.181835	0.503	0.491	0.665794	1	0.0531274	0.651	0.637	0.718177	1	-0.113558	0.441	0.505	0.0772091	1	-0.210047	0.56	0.592	0.407469	1
Ppp1r13b	0.147797	0.651	0.354	6.47088e-06	0.192412	-0.217052	0.344	0.456	0.0633087	1	-0.223674	0.439	0.593	0.00520856	1	0.113331	0.576	0.504	0.0235499	1	0.321852	0.362	0.345	0.460828	1	0.0707753	0.481	0.527	0.233879	1
Plcb3	0.577604	0.61	0.333	6.5323e-06	0.194238	0.583453	0.566	0.516	0.107028	1	0.294769	0.522	0.583	0.448051	1	-0.111081	0.572	0.577	0.0639641	1	0.422907	0.448	0.383	0.0220563	1	0.334089	0.562	0.51	0.378083	1
Gm37760	-0.967728	0.384	0.159	6.61358e-06	0.196655	-0.0535173	0.107	0.182	0.049142	1	-0.238685	0.21	0.361	0.00698788	1	0.512031	0.275	0.192	0.0148758	1	1.03551	0.071	0.125	0.00377597	1	-0.0029053	0.191	0.259	0.0432248	1
Tmpo	0.221956	0.644	0.386	6.72344e-06	0.199922	-1.10562	0.344	0.541	6.71391e-05	1	-0.153042	0.58	0.602	0.216093	1	-0.116045	0.632	0.662	0.110791	1	-0.148557	0.313	0.474	2.17991e-06	0.0648196	0.17081	0.569	0.66	0.33946	1
Vps51	0.632941	0.5	0.27	6.72638e-06	0.200009	0.251024	0.352	0.371	0.790729	1	1.64377	0.401	0.343	0.18643	1	0.288198	0.498	0.549	0.183094	1	0.0383525	0.325	0.326	0.897249	1	-0.434061	0.385	0.415	0.470797	1
Tjap1	0.200747	0.404	0.175	6.743e-06	0.200503	0.0670753	0.262	0.292	0.65577	1	-0.140136	0.439	0.361	0.391541	1	0.454743	0.487	0.403	0.0142971	1	0.089846	0.231	0.261	0.354257	1	0.335571	0.404	0.313	0.0119281	1
Prrt4	1.84333	0.144	0.016	6.79418e-06	0.202025	0.0497855	0.033	0.016	0.25181	1	-1.26391	0.019	0.019	0.991717	1	0.57318	0.104	0.038	0.000429867	1	-0.36042	0.019	0.012	0.367177	1	-0.225066	0.017	0.017	0.98411	1
Tspan18	0.507362	0.938	0.825	6.85309e-06	0.203777	0.0769675	0.861	0.881	0.447801	1	0.048757	0.943	0.944	0.835239	1	0.304973	0.933	0.874	0.000135009	1	0.184764	0.743	0.825	0.682053	1	0.146367	0.888	0.905	0.566382	1
Plk4	-1.01388	0.315	0.111	6.8836e-06	0.204684	0.398466	0.066	0.186	0.00186173	1	0.40108	0.166	0.259	0.140747	1	0.930384	0.227	0.142	0.00406957	1	-0.732974	0.058	0.108	0.00311691	1	0.26591	0.12	0.218	0.000749896	1
Layn	-0.225454	0.445	0.185	6.89817e-06	0.205117	-0.221292	0.164	0.192	0.465886	1	0.278194	0.28	0.241	0.531541	1	0.0880414	0.424	0.336	0.0118939	1	-0.310417	0.133	0.216	0.000587862	1	0.00917559	0.311	0.32	0.843769	1
Ubr2	0.26358	0.699	0.429	6.89975e-06	0.205164	0.280802	0.484	0.453	0.526	1	-0.0924267	0.611	0.62	0.749615	1	0.544979	0.654	0.551	0.000853696	1	0.0579558	0.338	0.366	0.360499	1	-0.00442605	0.584	0.633	0.0473595	1
Chmp6	0.276436	0.616	0.365	6.91279e-06	0.205552	0.00458348	0.492	0.575	0.271955	1	-0.262915	0.478	0.62	0.0844612	1	-0.0670269	0.602	0.597	0.325365	1	0.17879	0.508	0.507	0.54814	1	-0.039953	0.51	0.548	0.661517	1
Fabp4	0.419282	0.986	0.989	6.94135e-06	0.206401	0.665028	1	0.991	3.06936e-07	0.00912675	-1.0811	0.987	1	2.74492e-12	8.16203e-08	-0.0893041	0.993	0.996	0.513443	1	0.0471778	0.998	0.998	0.109591	1	-0.104209	1	1	0.0328117	1
Scaf8	0.621256	0.445	0.201	6.9535e-06	0.206762	0.546261	0.254	0.192	0.158448	1	-0.607879	0.287	0.343	0.167813	1	-0.0134794	0.476	0.376	0.0220385	1	0.320343	0.199	0.194	0.72793	1	0.0219946	0.311	0.282	0.582324	1
Ptk7	0.870712	0.301	0.101	6.95731e-06	0.206876	0.566559	0.279	0.264	0.512035	1	0.0525793	0.223	0.37	0.0143715	1	0.310521	0.316	0.215	0.00444075	1	-0.053097	0.173	0.225	0.0338377	1	-0.607354	0.213	0.269	0.0412471	1
Idh1	-0.107463	0.603	0.317	6.9803e-06	0.207559	-0.120318	0.328	0.393	0.195936	1	-0.0824676	0.401	0.435	0.33147	1	0.46138	0.569	0.482	0.0335973	1	0.240549	0.278	0.328	0.208257	1	-0.0599843	0.44	0.425	0.78799	1
Pgs1	0.4351	0.534	0.28	6.99825e-06	0.208093	0.0479502	0.5	0.462	0.79682	1	-0.0664963	0.541	0.491	0.641229	1	0.236205	0.55	0.527	0.651298	1	0.111624	0.398	0.445	0.208703	1	0.58964	0.526	0.425	0.00207661	1
Mark4	0.618734	0.425	0.19	7.00064e-06	0.208164	0.214792	0.385	0.34	0.389148	1	-0.109115	0.299	0.463	0.00723273	1	0.929004	0.32	0.292	0.31634	1	0.254813	0.272	0.268	0.543024	1	-0.456584	0.246	0.405	6.15375e-06	0.182982
Mrpl2	0.629903	0.527	0.275	7.01589e-06	0.208618	-0.497436	0.279	0.393	0.012202	1	-0.182858	0.452	0.5	0.328179	1	-0.173487	0.491	0.513	0.235203	1	-0.233855	0.268	0.352	0.00381321	1	-0.0683891	0.505	0.534	0.821882	1
Tgtp2	-1.20854	0.425	0.598	7.04218e-06	0.209399	0.0389395	0.279	0.368	0.164391	1	1.20249	0.433	0.222	0.000326695	1	-0.478393	0.587	0.679	0.00761202	1	-0.0354303	0.463	0.555	0.0453951	1	0.121494	0.589	0.554	0.28831	1
Oxa1l	0.0640058	0.521	0.265	7.06723e-06	0.210144	-0.00179669	0.303	0.418	0.0616145	1	0.361009	0.459	0.398	0.364517	1	0.0660318	0.494	0.564	0.0147589	1	-0.0603043	0.315	0.4	0.00690398	1	-0.217802	0.388	0.408	0.429163	1
Ocel1	0.482949	0.596	0.344	7.08977e-06	0.210814	0.229172	0.443	0.465	0.933435	1	-0.21067	0.42	0.472	0.444484	1	0.188631	0.524	0.538	0.835255	1	-0.171735	0.345	0.443	0.00188664	1	0.215773	0.455	0.446	0.580118	1
Hmox2	0.243852	0.76	0.513	7.0899e-06	0.210818	-0.0923577	0.5	0.679	0.0013421	1	0.605896	0.611	0.5	0.0549608	1	0.101709	0.684	0.659	0.512112	1	0.053675	0.46	0.545	0.0529922	1	-0.10545	0.617	0.575	0.232289	1
Zkscan1	0.495151	0.315	0.111	7.09754e-06	0.211045	-0.203274	0.164	0.142	0.677488	1	-0.493172	0.185	0.296	0.0349405	1	-0.00489752	0.323	0.277	0.240013	1	0.0470393	0.158	0.124	0.0940859	1	-0.338091	0.199	0.241	0.166252	1
Psat1	-0.864959	0.192	0.037	7.10064e-06	0.211137	0.0265018	0.066	0.06	0.819245	1	-1.113	0.064	0.065	0.975489	1	0.986481	0.223	0.144	0.00651736	1	-0.241529	0.041	0.088	0.00203706	1	0.544374	0.065	0.065	0.933553	1
Thsd7a	1.11625	0.39	0.175	7.12305e-06	0.211804	-0.71532	0.23	0.267	0.457932	1	0.644998	0.395	0.426	0.760246	1	0.291931	0.487	0.4	0.0191117	1	0.414947	0.22	0.263	0.173985	1	-0.0663995	0.395	0.418	0.472031	1
Tmbim4	-0.00658672	0.829	0.582	7.13007e-06	0.212013	0.0583771	0.689	0.792	0.603236	1	-0.462664	0.732	0.843	0.00353304	1	-0.359129	0.844	0.812	0.114896	1	-0.116543	0.632	0.699	0.0396229	1	-0.359045	0.739	0.881	2.18324e-05	0.649185
Sec22a	0.018773	0.329	0.116	7.13098e-06	0.21204	-0.110897	0.172	0.173	0.994927	1	0.37698	0.185	0.296	0.0567082	1	0.173711	0.305	0.288	0.687301	1	0.173166	0.139	0.168	0.243003	1	0.108712	0.287	0.255	0.349624	1
Slc26a2	0.546149	0.363	0.148	7.13665e-06	0.212208	0.465027	0.131	0.167	0.344406	1	0.662431	0.223	0.241	0.737547	1	-0.538198	0.249	0.257	0.636769	1	0.0785391	0.098	0.148	0.016463	1	-0.0886767	0.239	0.248	0.743061	1
Adh1	0.21604	0.116	0.005	7.18927e-06	0.213773	-0.0472819	0.09	0.088	0.960031	1	0.931643	0.115	0.241	0.00699926	1	0.538271	0.152	0.093	0.0196303	1	-0.480474	0.075	0.101	0.139677	1	-0.338191	0.139	0.17	0.241925	1
Pld2	-0.094497	0.473	0.217	7.19136e-06	0.213835	-0.175065	0.27	0.311	0.554518	1	0.473806	0.382	0.407	0.916666	1	0.468823	0.446	0.438	0.861885	1	0.15564	0.205	0.277	0.00998947	1	-0.519301	0.402	0.469	0.109477	1
Ddx58	0.0503315	0.692	0.466	7.19465e-06	0.213933	-0.345385	0.516	0.604	0.0311755	1	-0.255562	0.631	0.898	3.31984e-06	0.0987155	0.0290762	0.777	0.697	0.0961144	1	-0.179135	0.445	0.588	4.72561e-05	1	0.0710643	0.689	0.901	2.97573e-05	0.884834
Zbtb24	-0.178596	0.425	0.18	7.27317e-06	0.216268	-0.303263	0.172	0.22	0.294756	1	0.171692	0.268	0.361	0.0906736	1	0.320131	0.349	0.332	0.649356	1	-0.0956782	0.171	0.187	0.37374	1	-0.291609	0.239	0.272	0.270019	1
Ndrg1	-0.0217598	0.966	0.841	7.27371e-06	0.216284	-0.287928	0.959	0.915	0.322126	1	1.28448	0.911	0.87	0.0054863	1	0.491898	0.996	0.929	3.92795e-09	0.000116798	0.405902	0.942	0.923	2.85076e-07	0.00847674	-0.00874538	0.95	0.969	0.134782	1
Ldlrap1	0.473547	0.541	0.296	7.37054e-06	0.219163	0.201482	0.467	0.393	0.153713	1	-0.262463	0.446	0.481	0.194947	1	0.103025	0.498	0.504	0.552955	1	0.325806	0.415	0.397	0.199755	1	-0.0532232	0.414	0.473	0.174772	1
Ehhadh	1.48118	0.144	0.016	7.38689e-06	0.219649	0.576274	0.057	0.079	0.455712	1	-0.449438	0.115	0.13	0.643658	1	1.10134	0.126	0.053	0.000454758	1	-0.13145	0.045	0.053	0.558894	1	-0.311827	0.091	0.129	0.101824	1
Terf2ip	-0.00567113	0.5	0.249	7.41996e-06	0.220633	0.287873	0.361	0.336	0.407928	1	0.236899	0.382	0.454	0.390193	1	0.455519	0.506	0.431	0.0755412	1	-0.224191	0.265	0.347	0.00215427	1	0.219582	0.419	0.422	0.733151	1
Ttc8	0.817588	0.178	0.032	7.44084e-06	0.221253	1.10451	0.057	0.097	0.186199	1	-0.778306	0.057	0.111	0.104265	1	1.01265	0.201	0.062	1.86982e-08	0.000555991	-0.0305689	0.068	0.074	0.666379	1	-0.174874	0.079	0.112	0.135956	1
Gm27517	0.84435	0.288	0.095	7.45175e-06	0.221578	-0.213968	0.066	0.104	0.22634	1	-0.373762	0.166	0.287	0.0106657	1	0.321646	0.171	0.08	0.000280207	1	-0.0463685	0.045	0.053	0.518594	1	-0.368335	0.139	0.214	0.00843104	1
Rpl39	0.365692	0.863	0.598	7.45587e-06	0.2217	-0.131467	0.762	0.84	0.074803	1	-0.887815	0.758	0.787	3.16616e-05	0.941458	-0.00256963	0.792	0.681	0.0752141	1	-0.397189	0.657	0.782	1.59823e-09	4.75234e-05	-0.615157	0.639	0.772	2.71617e-09	8.07652e-05
Gm26772	-0.397475	0.055	0.228	7.52663e-06	0.223804	0.0293895	0.107	0.182	0.0796187	1	0.00381209	0.108	0.102	0.879716	1	-0.143428	0.067	0.153	0.000620649	1	-0.232165	0.189	0.222	0.28654	1	0.224893	0.148	0.071	0.00154167	1
Rasgrp4	0.20928	0.473	0.217	7.56839e-06	0.225046	-0.163594	0.295	0.349	0.29097	1	-0.235559	0.35	0.481	0.0475169	1	0.41501	0.446	0.31	0.000186599	1	-0.240483	0.27	0.34	0.0247817	1	0.486423	0.4	0.316	0.0247177	1
Fam102a	0.590977	0.479	0.243	7.57563e-06	0.225261	0.284601	0.311	0.157	0.000517965	1	-0.204373	0.28	0.463	0.00243125	1	0.406996	0.48	0.369	0.00312098	1	0.323592	0.235	0.222	0.474985	1	-0.231336	0.354	0.5	5.67889e-05	1
Lgals8	0.174231	0.671	0.407	7.57907e-06	0.225364	-0.59969	0.361	0.491	0.00580998	1	0.275811	0.522	0.546	0.603095	1	0.0485918	0.688	0.677	0.875598	1	-0.281902	0.385	0.503	0.00114923	1	0.28347	0.569	0.517	0.147717	1
Mob2	-0.116302	0.705	0.444	7.60275e-06	0.226068	0.139049	0.525	0.575	0.426527	1	0.112457	0.592	0.602	0.809954	1	0.239809	0.684	0.646	0.335839	1	0.232343	0.499	0.527	0.926682	1	-0.0426478	0.538	0.568	0.31071	1
Cir1	0.621584	0.438	0.212	7.60805e-06	0.226225	-0.318792	0.23	0.302	0.145379	1	-0.455857	0.401	0.556	0.0334207	1	-0.278551	0.413	0.456	0.153959	1	-0.456113	0.188	0.247	0.0105094	1	-0.601039	0.344	0.51	1.02956e-06	0.0306138
Arhgef40	0.507775	0.555	0.312	7.63332e-06	0.226977	0.0434789	0.377	0.469	0.12069	1	0.322623	0.49	0.565	0.584209	1	0.483262	0.58	0.569	0.617775	1	-0.185488	0.385	0.428	0.176354	1	-0.0948428	0.467	0.531	0.0810401	1
Etnk1	0.210218	0.671	0.397	7.6379e-06	0.227113	0.0877521	0.377	0.412	0.477893	1	-0.331254	0.484	0.537	0.0741518	1	0.0589532	0.613	0.65	0.371281	1	0.0979966	0.4	0.368	0.262288	1	0.0155904	0.577	0.609	0.262912	1
Flot1	0.477207	0.603	0.365	7.64076e-06	0.227198	0.22591	0.508	0.55	0.655101	1	0.332357	0.599	0.574	0.653456	1	0.251466	0.632	0.5	0.000474911	1	0.0693769	0.447	0.485	0.691316	1	0.251688	0.596	0.531	0.14613	1
Uap1l1	1.90696	0.37	0.169	7.65402e-06	0.227592	0.632061	0.254	0.233	0.492527	1	0.184596	0.268	0.157	0.0408445	1	-0.41024	0.312	0.361	0.141443	1	-0.606912	0.169	0.254	0.000248552	1	0.46553	0.373	0.262	0.000839651	1
Ttc14	0.235381	0.527	0.259	7.70036e-06	0.22897	0.189513	0.336	0.333	0.801888	1	-0.553654	0.331	0.417	0.0967382	1	0.313438	0.58	0.438	0.000773769	1	-0.0681983	0.233	0.284	0.0485139	1	-0.105245	0.4	0.412	0.66114	1
Ubb	-0.162428	1	1	7.723e-06	0.229644	-0.145694	1	1	0.000986835	1	0.0102848	1	1	0.390457	1	-0.0919694	1	0.998	0.0131959	1	-0.0190474	0.985	0.997	0.753244	1	-0.0277317	0.995	1	0.2263	1
Wbp1	0.222716	0.397	0.169	7.7317e-06	0.229902	-0.296249	0.311	0.371	0.173214	1	-0.441081	0.312	0.407	0.150961	1	-0.0999907	0.357	0.4	0.215327	1	-0.220263	0.223	0.314	0.00131018	1	-0.45756	0.34	0.395	0.209515	1
Tbc1d8b	1.74827	0.144	0.016	7.74746e-06	0.230371	-0.295346	0.016	0.041	0.211992	1	-0.60595	0.064	0.056	0.832583	1	1.39367	0.149	0.038	8.73451e-08	0.00259721	-1.07774	0.015	0.041	0.00907227	1	-0.216713	0.048	0.068	0.264391	1
Smim12	0.193398	0.623	0.36	7.7806e-06	0.231356	-0.283058	0.369	0.522	0.00696331	1	0.0451794	0.51	0.565	0.703577	1	0.0656436	0.599	0.595	0.820259	1	0.394003	0.426	0.387	0.0369691	1	-0.516709	0.445	0.575	0.00145999	1
Mir6240	-0.639553	0.671	0.799	7.78981e-06	0.23163	-0.276878	0.82	0.846	0.0166674	1	0.0939036	0.662	0.611	0.406059	1	-0.644091	0.703	0.858	4.33664e-13	1.2895e-08	-0.22932	0.904	0.887	0.000371569	1	-0.0322755	0.636	0.622	0.603268	1
Sec24c	0.192682	0.678	0.397	7.82749e-06	0.23275	-0.260733	0.361	0.525	0.00434171	1	-0.208286	0.631	0.676	0.183558	1	-0.167764	0.643	0.67	0.321828	1	0.19146	0.362	0.421	0.129581	1	-0.0687191	0.605	0.633	0.590501	1
S100a11	0.534449	0.822	0.608	7.86443e-06	0.233849	-0.299245	0.795	0.849	0.0188201	1	-0.87924	0.739	0.935	5.08184e-11	1.51109e-06	-0.110471	0.833	0.761	0.455345	1	-0.220522	0.664	0.739	0.00643801	1	-0.602721	0.711	0.83	2.02602e-07	0.00602436
Mtmr9	0.492993	0.336	0.127	7.92325e-06	0.235598	0.48409	0.213	0.192	0.624463	1	-1.58254	0.121	0.324	2.54885e-05	0.7579	0.424218	0.26	0.268	0.847439	1	-0.211567	0.131	0.12	0.528562	1	-0.584304	0.144	0.259	0.00010955	1
Cpt1c	1.01566	0.144	0.016	7.93399e-06	0.235917	1.56152	0.189	0.047	2.76299e-06	0.0821574	-0.654881	0.102	0.213	0.014033	1	0.829938	0.164	0.117	0.0916205	1	0.210466	0.114	0.05	8.14701e-05	1	-0.484177	0.127	0.139	0.676627	1
Kdm6a	0.268058	0.527	0.265	8.05225e-06	0.239434	0.190575	0.172	0.179	0.875037	1	-0.0517637	0.287	0.352	0.146739	1	0.475143	0.513	0.442	0.0129196	1	0.599802	0.223	0.151	0.00184543	1	-0.0403177	0.299	0.299	0.861955	1
Serhl	0.211067	0.589	0.312	8.06297e-06	0.239752	-0.0429181	0.434	0.456	0.668389	1	0.123022	0.478	0.361	0.154778	1	0.20634	0.539	0.54	0.818224	1	0.175364	0.377	0.393	0.739627	1	0.0755156	0.505	0.561	0.325762	1
Gm10762	0.58172	0.144	0.016	8.12482e-06	0.241591	-1.04416	0.057	0.094	0.172783	1	-1.08067	0.038	0.12	0.0105733	1	0.382232	0.156	0.108	0.0800988	1	-0.164744	0.028	0.055	0.0266632	1	-0.993993	0.072	0.139	0.00258399	1
Rnf215	0.206323	0.685	0.407	8.17196e-06	0.242993	-0.074527	0.525	0.503	0.691114	1	-0.217692	0.541	0.63	0.0551367	1	-0.113204	0.717	0.673	0.969007	1	-0.0127845	0.355	0.442	0.0201256	1	-0.292928	0.557	0.612	0.163223	1
Lysmd2	-0.566229	0.384	0.159	8.20282e-06	0.243911	0.211934	0.197	0.286	0.0634302	1	-0.701317	0.28	0.306	0.639876	1	-0.707918	0.439	0.509	0.00133515	1	-0.185968	0.191	0.263	0.00835948	1	0.105702	0.39	0.371	0.46985	1
Ndufv3	0.572247	0.733	0.481	8.21325e-06	0.244221	-0.381002	0.607	0.686	0.11447	1	-0.482675	0.599	0.769	0.00093725	1	0.209348	0.736	0.673	0.0295254	1	-0.397982	0.458	0.61	9.20206e-07	0.0273623	-0.283955	0.734	0.776	0.0945775	1
Sbf1	0.127928	0.479	0.228	8.21922e-06	0.244398	0.168573	0.369	0.33	0.578792	1	0.169745	0.338	0.37	0.780685	1	0.653083	0.48	0.361	0.000448182	1	0.410308	0.283	0.32	0.334456	1	-0.18642	0.301	0.35	0.213891	1
Serpinb6a	0.357829	0.884	0.704	8.26117e-06	0.245646	-0.120925	0.803	0.836	0.308641	1	0.124569	0.809	0.843	0.875868	1	-0.222452	0.851	0.819	0.43497	1	0.0502832	0.705	0.768	0.221731	1	-0.0834699	0.789	0.83	0.095118	1
Dpcd	0.281518	0.39	0.159	8.26262e-06	0.245689	-0.17097	0.189	0.27	0.0689873	1	-0.289523	0.325	0.38	0.403081	1	-0.110491	0.383	0.365	0.711165	1	-0.32542	0.156	0.241	0.000904942	1	0.0977984	0.28	0.327	0.366878	1
Cdk5rap3	-0.115431	0.486	0.243	8.28436e-06	0.246335	0.473296	0.238	0.403	0.00631691	1	-0.0827404	0.369	0.352	0.8997	1	0.632812	0.532	0.42	0.0050195	1	0.16323	0.287	0.316	0.510734	1	0.580457	0.478	0.378	0.0115446	1
Ptpn2	0.47119	0.445	0.201	8.34533e-06	0.248148	-0.188711	0.148	0.299	0.00199724	1	-0.251781	0.299	0.259	0.475653	1	-0.273509	0.346	0.409	0.0433245	1	-0.207634	0.163	0.216	0.0326957	1	-0.469015	0.287	0.293	0.786328	1
Impad1	1.16753	0.438	0.217	8.39088e-06	0.249503	-0.594021	0.197	0.267	0.10414	1	-0.722253	0.185	0.324	0.00654681	1	0.336654	0.457	0.345	0.00170917	1	-0.283224	0.124	0.177	0.0148798	1	-0.512927	0.215	0.296	0.0117102	1
Asnsd1	0.0486851	0.342	0.127	8.41874e-06	0.250331	0.0108852	0.18	0.16	0.690994	1	-0.143782	0.261	0.324	0.306451	1	-0.193145	0.301	0.332	0.27532	1	-0.149959	0.144	0.148	0.841382	1	0.593578	0.287	0.255	0.304559	1
Kbtbd7	0.576041	0.295	0.095	8.46587e-06	0.251733	-0.619307	0.057	0.091	0.238493	1	0.890295	0.127	0.093	0.369756	1	-0.348308	0.182	0.111	0.0133374	1	-0.375801	0.066	0.084	0.231721	1	-0.00407885	0.117	0.119	0.88549	1
Ankrd29	0.400627	0.575	0.307	8.64924e-06	0.257185	0.0933586	0.352	0.393	0.556269	1	-0.843452	0.471	0.593	0.00318901	1	0.029659	0.513	0.491	0.388632	1	0.248192	0.244	0.253	0.758448	1	-0.124158	0.498	0.517	0.580703	1
Rbm8a	0.199508	0.822	0.556	8.6646e-06	0.257642	-0.28463	0.516	0.673	0.00779179	1	-0.335319	0.745	0.741	0.251878	1	-0.0685025	0.784	0.728	0.794618	1	-0.343867	0.445	0.624	8.0874e-08	0.00240479	-0.182083	0.675	0.721	0.196651	1
Eps8l2	0.221822	0.562	0.328	8.68824e-06	0.258345	-0.0175668	0.18	0.374	4.72595e-05	1	0.453002	0.389	0.269	0.0379745	1	0.0310019	0.528	0.535	0.520339	1	-0.71055	0.188	0.345	1.43871e-08	0.000427802	0.751011	0.378	0.255	5.23383e-05	1
Ltn1	0.403545	0.411	0.185	8.6927e-06	0.258477	0.107481	0.238	0.201	0.413821	1	-0.616206	0.344	0.333	0.756367	1	0.321498	0.398	0.294	0.00160933	1	-0.0504215	0.167	0.216	0.0321555	1	0.41393	0.33	0.265	0.0568751	1
Narf	-0.95118	0.377	0.153	8.69846e-06	0.258649	0.0794354	0.115	0.154	0.305982	1	0.253863	0.191	0.25	0.177585	1	0.216891	0.305	0.288	0.8877	1	0.0360769	0.141	0.141	0.934856	1	0.515254	0.175	0.204	0.432028	1
Ints4	0.00135149	0.479	0.228	8.75322e-06	0.260277	-0.113927	0.213	0.352	0.00760857	1	-0.147017	0.363	0.398	0.657837	1	-0.131297	0.48	0.436	0.350033	1	0.110748	0.313	0.28	0.203298	1	0.888399	0.464	0.241	8.15424e-10	2.42466e-05
BC048546	-0.201975	0.007	0.143	8.77137e-06	0.260817	-0.0295768	0.131	0.164	0.434882	1	0.0958982	0.064	0.009	0.0288676	1	-0.159235	0.004	0.08	8.11345e-06	0.241253	0.0508726	0.173	0.148	0.247013	1	0.173921	0.105	0	9.7534e-09	0.000290017
Ptrf	0.0758458	0.726	0.556	8.80233e-06	0.261737	-0.252683	0.352	0.525	0.000903779	1	-0.303705	0.732	0.87	0.0033067	1	-0.20041	0.736	0.79	0.395728	1	-0.765892	0.272	0.49	5.60994e-12	1.66812e-07	0.0923887	0.751	0.874	0.0699758	1
Gda	0.149491	0.315	0.106	8.84137e-06	0.262898	0.117799	0.098	0.119	0.52375	1	-1.37577	0.096	0.194	0.0136517	1	1.44402	0.234	0.113	1.86913e-05	0.555786	-0.491622	0.041	0.093	0.000707959	1	0.69621	0.167	0.15	0.489019	1
Ddah1	1.44631	0.178	0.032	8.88174e-06	0.264098	0.230086	0.082	0.101	0.599678	1	-1.24143	0.115	0.167	0.196583	1	-0.698044	0.208	0.082	8.52103e-07	0.0253373	-0.428125	0.038	0.069	0.0194599	1	0.492393	0.074	0.109	0.108645	1
Mesdc1	0.51791	0.719	0.444	8.8834e-06	0.264148	-0.069733	0.508	0.519	0.631959	1	0.159693	0.554	0.657	0.436077	1	-0.084085	0.572	0.582	0.878402	1	-0.210895	0.281	0.387	0.000637439	1	-0.255836	0.464	0.497	0.142818	1
Trmt1	0.228871	0.514	0.265	9.00294e-06	0.267702	-0.167406	0.254	0.437	0.00232141	1	-0.120609	0.395	0.287	0.101815	1	0.0517122	0.442	0.5	0.0878259	1	-0.532341	0.186	0.314	1.74913e-06	0.0520103	0.593471	0.404	0.255	1.71838e-05	0.510961
Pcdh1	0.477172	0.795	0.54	9.00596e-06	0.267792	0.215335	0.582	0.651	0.964364	1	-0.411307	0.688	0.833	0.00126422	1	0.397637	0.74	0.617	1.43495e-05	0.426682	0.125058	0.456	0.497	0.456998	1	-0.397571	0.572	0.684	9.95072e-05	1
Hoxb9	0.53476	0.295	0.101	9.06867e-06	0.269657	0.467924	0.213	0.245	0.647599	1	-0.153568	0.204	0.269	0.233177	1	0.525021	0.364	0.23	5.59543e-05	1	0.387984	0.227	0.239	0.960023	1	-0.138211	0.287	0.245	0.217694	1
RP23-38L11.2	0.193436	0.493	0.228	9.08971e-06	0.270283	0.0655598	0.246	0.204	0.332079	1	0.0506881	0.382	0.37	0.665985	1	0.263813	0.331	0.177	3.65622e-07	0.0108718	-0.0127507	0.081	0.089	0.653212	1	-0.197601	0.112	0.272	9.81969e-08	0.00291989
Ube2v2	0.364861	0.5	0.254	9.09191e-06	0.270348	-0.317401	0.172	0.314	0.0061918	1	0.190802	0.408	0.37	0.484485	1	0.272176	0.524	0.434	0.0321771	1	-0.209609	0.188	0.275	0.000966729	1	0.157161	0.428	0.401	0.635658	1
Surf1	0.148192	0.637	0.354	9.11883e-06	0.271148	-0.343546	0.402	0.459	0.135208	1	0.506604	0.548	0.556	0.648518	1	0.0135129	0.565	0.577	0.965296	1	0.321793	0.36	0.395	0.666238	1	0.214812	0.608	0.568	0.213394	1
Galnt1	0.232115	0.575	0.328	9.18131e-06	0.273006	0.0541027	0.336	0.333	0.92172	1	-0.612341	0.465	0.537	0.0833748	1	0.35597	0.647	0.564	0.0129437	1	-0.384945	0.197	0.314	1.68832e-05	0.502023	-0.0804285	0.39	0.429	0.281425	1
Tmed3	0.437929	0.616	0.354	9.1849e-06	0.273113	-0.192741	0.475	0.619	0.000913096	1	0.221535	0.713	0.648	0.298513	1	0.19312	0.706	0.65	0.409567	1	-0.218606	0.501	0.574	0.0191876	1	-0.169191	0.701	0.738	0.730812	1
Rtfdc1	0.117427	0.699	0.413	9.24559e-06	0.274918	-0.0304986	0.615	0.626	0.648802	1	0.278828	0.624	0.602	0.36527	1	-0.121256	0.706	0.723	0.173893	1	0.250485	0.499	0.531	0.961201	1	0.0577734	0.67	0.643	0.376956	1
Ccdc102a	0.216055	0.432	0.201	9.33323e-06	0.277524	-0.321161	0.303	0.33	0.409879	1	0.275644	0.28	0.315	0.7436	1	0.26317	0.45	0.5	0.392241	1	0.0796505	0.289	0.34	0.11563	1	-0.252365	0.321	0.289	0.531337	1
Abhd2	-0.0520085	0.534	0.296	9.38719e-06	0.279128	0.212059	0.303	0.421	0.0848138	1	-0.905609	0.535	0.815	4.70433e-09	0.000139883	0.499461	0.506	0.476	0.0427673	1	-0.0167477	0.251	0.352	0.000586397	1	-0.626609	0.589	0.803	1.01565e-13	3.02003e-09
D19Bwg1357e	0.63781	0.445	0.212	9.3905e-06	0.279226	0.284251	0.23	0.349	0.0656265	1	-0.360637	0.306	0.306	0.855595	1	-0.892366	0.361	0.515	6.5508e-07	0.0194788	-0.394233	0.174	0.278	8.038e-05	1	0.300389	0.416	0.299	0.00110893	1
Snapc5	0.40612	0.514	0.27	9.52918e-06	0.28335	0.0931413	0.336	0.415	0.30314	1	-0.750054	0.376	0.519	0.0172866	1	-0.266235	0.454	0.487	0.419547	1	-0.487876	0.251	0.363	0.000115806	1	-0.250295	0.478	0.473	0.822007	1
Zdhhc12	0.868085	0.411	0.185	9.54011e-06	0.283675	0.620831	0.27	0.296	0.972025	1	-0.84834	0.261	0.333	0.165647	1	-0.0805074	0.424	0.431	0.789884	1	0.0805406	0.221	0.277	0.0847514	1	0.0525978	0.356	0.347	0.821122	1
2810474O19Rik	0.454987	0.774	0.524	9.67427e-06	0.287664	0.0678663	0.492	0.566	0.446894	1	-0.256716	0.65	0.796	0.00170663	1	-0.0444384	0.762	0.743	0.608782	1	-0.43832	0.458	0.601	4.33599e-06	0.128931	-0.735316	0.667	0.901	2.97919e-17	8.85861e-13
Acer2	0.361197	0.966	0.868	9.70322e-06	0.288525	0.480613	0.934	0.943	5.80086e-05	1	-0.200947	0.987	1	0.00606265	1	0.414486	0.981	0.931	9.23523e-07	0.027461	0.222843	0.876	0.89	0.154443	1	-0.0511385	0.976	0.983	0.0229049	1
Clcn7	-0.183607	0.644	0.344	9.81069e-06	0.291721	-0.387445	0.336	0.472	0.0168383	1	-0.268818	0.592	0.593	0.801921	1	0.543542	0.599	0.588	0.105398	1	-0.178586	0.39	0.431	0.247753	1	0.556872	0.653	0.561	0.000541131	1
Nadk	0.332181	0.753	0.519	9.83485e-06	0.292439	0.06174	0.615	0.745	0.0330196	1	0.188463	0.713	0.741	0.903564	1	0.133349	0.751	0.741	0.607937	1	-0.0439087	0.544	0.679	5.63612e-05	1	0.363943	0.734	0.684	0.00660256	1
Gm20605	0.260275	0.541	0.286	9.86756e-06	0.293412	0.0603488	0.41	0.516	0.188637	1	0.819997	0.471	0.463	0.651125	1	0.302967	0.502	0.478	0.613487	1	0.0308826	0.315	0.39	0.0196688	1	-0.242862	0.481	0.449	0.450855	1
Msr1	1.2614	0.226	0.058	9.87061e-06	0.293503	1.6212	0.156	0.05	0.000204447	1	-0.158895	0.159	0.167	0.869816	1	1.80535	0.167	0.009	4.47917e-16	1.33188e-11	0.514438	0.069	0.045	0.0720112	1	-0.288331	0.089	0.085	0.832194	1
Mapk11	0.533842	0.555	0.307	9.95137e-06	0.295904	0.334292	0.508	0.44	0.152471	1	0.248518	0.567	0.611	0.781957	1	-0.137922	0.55	0.569	0.402911	1	0.0394111	0.454	0.414	0.164839	1	0.197132	0.634	0.534	0.008936	1
Polr1b	0.743448	0.308	0.111	9.9842e-06	0.29688	-0.388535	0.115	0.132	0.651283	1	-1.18118	0.185	0.185	0.884125	1	0.138743	0.26	0.261	0.743416	1	-0.275914	0.069	0.148	5.75572e-05	1	0.819308	0.108	0.136	0.282154	1
Tlr4	0.632692	0.493	0.238	1.01356e-05	0.301383	0.400408	0.311	0.296	0.491047	1	0.0348261	0.312	0.37	0.326799	1	0.17026	0.468	0.46	0.912106	1	0.367011	0.218	0.191	0.203195	1	-0.354129	0.371	0.388	0.286283	1
Tmppe	0.359257	0.596	0.344	1.02121e-05	0.303656	-0.942462	0.361	0.425	0.280825	1	-0.511999	0.357	0.37	0.598919	1	0.377144	0.602	0.347	2.33243e-11	6.93547e-07	-0.557756	0.328	0.421	0.00163403	1	-0.073348	0.34	0.333	0.862664	1
Smc4	0.426285	0.432	0.206	1.02123e-05	0.303663	0.309195	0.254	0.277	0.745192	1	-0.629129	0.344	0.435	0.0782496	1	0.236621	0.353	0.347	0.626526	1	-0.451602	0.199	0.261	0.0111152	1	-0.0855694	0.411	0.473	0.105041	1
Zfp518a	0.713392	0.308	0.116	1.02535e-05	0.304888	-0.0477934	0.148	0.182	0.445902	1	-0.284993	0.159	0.213	0.252082	1	-0.00193101	0.264	0.257	0.863047	1	0.306374	0.101	0.122	0.331161	1	-0.966843	0.144	0.231	0.00265381	1
Clec14a	0.19462	0.993	0.878	1.02643e-05	0.305209	0.440881	0.934	0.956	5.70255e-05	1	0.078158	0.981	0.991	0.723372	1	0.34793	0.996	0.929	1.44766e-05	0.43046	0.508721	0.991	0.959	1.32336e-14	3.935e-10	0.000118045	0.993	0.986	0.0727085	1
Fbxo7	0.423053	0.63	0.381	1.03313e-05	0.307201	-0.0751459	0.221	0.384	0.00301872	1	0.0345965	0.484	0.463	0.653603	1	-0.178291	0.658	0.584	0.495309	1	0.494755	0.319	0.369	0.251674	1	-0.0809499	0.533	0.486	0.141386	1
Sfi1	1.47263	0.411	0.19	1.04063e-05	0.309433	-0.0507441	0.352	0.28	0.148033	1	-0.620664	0.331	0.444	0.0413159	1	0.0315166	0.401	0.268	0.000139916	1	-0.0879296	0.216	0.258	0.189576	1	0.0996732	0.328	0.354	0.422869	1
Ets1	0.312661	0.87	0.725	1.04124e-05	0.309612	-0.641627	0.615	0.814	2.76857e-05	0.823233	-0.0767261	0.809	0.935	0.0296446	1	0.095302	0.874	0.819	0.305025	1	-0.331566	0.52	0.711	5.26617e-11	1.56589e-06	-0.205849	0.785	0.895	5.09925e-06	0.151626
Ubl7	0.128254	0.671	0.402	1.04179e-05	0.309777	0.0633646	0.508	0.654	0.0518747	1	-0.240318	0.599	0.657	0.277229	1	-0.250669	0.669	0.646	0.284165	1	0.173007	0.495	0.526	0.730688	1	-0.019606	0.569	0.602	0.903197	1
Pwwp2b	-0.194736	0.445	0.196	1.04792e-05	0.311598	0.301525	0.32	0.255	0.163862	1	0.0394429	0.363	0.333	0.750021	1	0.198953	0.338	0.338	0.931312	1	1.00332	0.205	0.184	0.360147	1	0.666765	0.335	0.238	0.0052742	1
Edem2	0.914912	0.486	0.275	1.04848e-05	0.311767	-0.429074	0.295	0.428	0.0148724	1	-0.475653	0.427	0.481	0.360579	1	0.0194678	0.535	0.524	0.826168	1	0.0572783	0.343	0.404	0.10522	1	0.0327813	0.443	0.507	0.107209	1
Tmem263	0.457505	0.37	0.148	1.04944e-05	0.31205	0.109034	0.148	0.211	0.130387	1	-0.320423	0.274	0.398	0.0250568	1	0.303002	0.364	0.303	0.0404165	1	-0.071727	0.158	0.167	0.784951	1	-0.553144	0.359	0.35	0.846866	1
Dcp1b	0.591701	0.363	0.153	1.05676e-05	0.314229	0.380441	0.197	0.264	0.239165	1	-0.808323	0.255	0.389	0.0127511	1	0.352093	0.428	0.303	0.00123777	1	-0.232625	0.221	0.27	0.0676793	1	0.251111	0.297	0.262	0.184258	1
Fbxw5	-0.0825355	0.616	0.354	1.05943e-05	0.315022	0.0213639	0.377	0.352	0.765642	1	-0.0510549	0.478	0.472	0.969758	1	-0.0862517	0.595	0.593	0.298409	1	0.139662	0.366	0.405	0.219211	1	-0.09615	0.493	0.554	0.31431	1
Socs5	0.530808	0.74	0.55	1.06032e-05	0.315288	0.582389	0.623	0.648	0.449677	1	0.158042	0.701	0.815	0.222703	1	0.297063	0.74	0.692	0.164756	1	0.49097	0.555	0.555	0.0601365	1	-0.0332684	0.72	0.731	0.490656	1
Rarb	0.313176	0.603	0.339	1.06308e-05	0.316106	-0.851342	0.328	0.491	0.000553584	1	0.695009	0.516	0.519	0.982731	1	0.147187	0.662	0.631	0.814173	1	-0.0969561	0.478	0.505	0.447164	1	0.0116703	0.615	0.643	0.120208	1
Lrrc40	0.26478	0.247	0.074	1.06394e-05	0.316364	-0.391667	0.123	0.101	0.556451	1	0.237177	0.153	0.204	0.295262	1	-0.616827	0.264	0.265	0.694944	1	0.372453	0.079	0.093	0.44303	1	-0.152222	0.172	0.235	0.0628799	1
Aasdh	1.71725	0.185	0.037	1.06405e-05	0.316396	-0.886112	0.09	0.11	0.517883	1	-0.0134559	0.121	0.102	0.681321	1	1.48958	0.193	0.122	0.00895117	1	-0.194985	0.054	0.084	0.0532071	1	0.394168	0.146	0.122	0.371316	1
Thtpa	0.704614	0.411	0.185	1.06754e-05	0.317433	-0.0940468	0.303	0.321	0.714244	1	-0.112882	0.287	0.333	0.23448	1	-0.164833	0.405	0.35	0.210693	1	-0.0472811	0.221	0.287	0.0265945	1	-0.168566	0.344	0.32	0.419519	1
1110035H17Rik	0.841582	0.356	0.143	1.07129e-05	0.318548	-0.0335675	0.23	0.261	0.536886	1	-0.337594	0.229	0.306	0.17609	1	0.688244	0.342	0.241	0.0024806	1	-0.289848	0.203	0.266	0.0194195	1	-0.273158	0.27	0.282	0.62315	1
Ltv1	0.19	0.363	0.148	1.07397e-05	0.319344	-0.710628	0.139	0.261	0.00593549	1	0.143446	0.261	0.259	0.913309	1	0.370948	0.387	0.27	0.00220129	1	0.0903475	0.156	0.23	0.00279995	1	0.582716	0.244	0.197	0.128253	1
Snai2	0.128652	0.582	0.323	1.07409e-05	0.319379	-0.281033	0.41	0.462	0.126801	1	0.346386	0.541	0.556	0.910686	1	0.323688	0.639	0.635	0.729658	1	0.0257925	0.46	0.488	0.441817	1	0.0879698	0.6	0.514	0.0810886	1
Haghl	1.30076	0.349	0.148	1.07507e-05	0.319673	-0.578459	0.172	0.267	0.0349304	1	-0.176971	0.306	0.361	0.279064	1	0.158735	0.353	0.343	0.956081	1	0.463212	0.246	0.222	0.252806	1	-0.0486705	0.278	0.361	0.0590902	1
Ormdl2	0.344382	0.719	0.439	1.07711e-05	0.32028	0.267866	0.533	0.563	0.691111	1	-0.2695	0.624	0.731	0.102696	1	0.0365203	0.654	0.659	0.71502	1	0.120408	0.394	0.46	0.120528	1	-0.212063	0.596	0.646	0.136991	1
Med29	0.582505	0.473	0.233	1.07943e-05	0.320967	-0.0301336	0.344	0.343	0.76625	1	-0.651925	0.28	0.454	0.00427687	1	-0.314736	0.446	0.456	0.983704	1	-0.319701	0.225	0.311	0.00269428	1	-0.516128	0.361	0.432	0.0660717	1
Tjp1	0.1455	0.774	0.54	1.0805e-05	0.321288	0.0892515	0.656	0.585	0.259348	1	0.0869183	0.65	0.685	0.422344	1	0.277089	0.77	0.65	0.000251541	1	0.0787905	0.469	0.541	0.119752	1	-0.0551175	0.737	0.711	0.444346	1
Ifnar1	0.508752	0.753	0.55	1.08169e-05	0.321642	-0.225475	0.549	0.651	0.103891	1	-0.0313962	0.707	0.667	0.311277	1	0.363537	0.784	0.723	0.00746669	1	0.0861775	0.617	0.598	0.403539	1	0.368717	0.778	0.765	0.325161	1
Vkorc1	0.0761142	0.575	0.275	1.082e-05	0.321733	-0.595982	0.361	0.484	0.0113681	1	-0.674583	0.446	0.593	0.00877566	1	-0.639415	0.524	0.628	0.000295388	1	-0.354979	0.319	0.486	4.26294e-07	0.0126758	-0.280677	0.5	0.643	0.010576	1
Siah1a	0.0626682	0.349	0.127	1.08459e-05	0.322503	-0.847966	0.049	0.167	0.00132396	1	-0.127765	0.178	0.259	0.118826	1	0.357303	0.327	0.201	0.000234935	1	-0.217633	0.101	0.119	0.372326	1	-0.0892046	0.242	0.269	0.325107	1
Sgsh	0.245082	0.397	0.169	1.0846e-05	0.322507	0.372739	0.27	0.208	0.182223	1	-0.576721	0.223	0.389	0.00195416	1	0.22252	0.431	0.343	0.0600951	1	0.998151	0.227	0.192	0.0699836	1	-0.743795	0.232	0.391	1.69824e-06	0.0504972
mt-Nd5	0.323276	1	0.974	1.08861e-05	0.323697	-0.379843	0.934	0.991	4.14742e-05	1	-0.166283	0.994	1	0.0474081	1	0.185726	1	0.982	0.00360254	1	-0.519414	0.891	0.971	1.59389e-15	4.73943e-11	-0.0162645	0.983	0.993	0.350942	1
Lhfp	0.518167	0.233	0.063	1.09666e-05	0.326092	0.821038	0.074	0.097	0.46199	1	-0.0121556	0.159	0.139	0.672332	1	1.45483	0.26	0.181	0.0179013	1	-1.00863	0.058	0.101	0.00771721	1	1.28427	0.11	0.075	0.102566	1
Mmgt1	1.08741	0.37	0.164	1.09816e-05	0.326538	-0.709669	0.148	0.157	0.640747	1	0.563257	0.274	0.204	0.160591	1	0.0278698	0.349	0.265	0.0246101	1	0.107209	0.152	0.151	0.832326	1	0.0356339	0.263	0.231	0.316628	1
Cand1	0.161208	0.5	0.275	1.09967e-05	0.326986	0.100327	0.295	0.34	0.643055	1	0.350388	0.42	0.315	0.118984	1	0.0259736	0.468	0.416	0.096712	1	0.20039	0.251	0.282	0.411233	1	0.248705	0.435	0.374	0.0713779	1
Gm15266	0.309547	0.534	0.296	1.10848e-05	0.329607	-0.287318	0.393	0.61	0.000521419	1	-0.262491	0.261	0.509	7.66564e-05	1	0.350618	0.494	0.239	1.27933e-12	3.80408e-08	-0.219475	0.398	0.515	4.91385e-05	1	-0.285547	0.227	0.418	9.50501e-08	0.00282631
Ift46	0.507396	0.445	0.222	1.11301e-05	0.330952	-0.32041	0.23	0.289	0.231584	1	-0.343153	0.28	0.315	0.267489	1	0.425026	0.431	0.369	0.147688	1	0.162075	0.235	0.265	0.333782	1	0.206659	0.301	0.269	0.295949	1
Gm8797	-0.18202	0.993	1	1.11753e-05	0.332297	-0.290493	0.992	1	5.20733e-08	0.0015484	-0.0103112	0.994	1	0.871072	1	0.00638881	0.993	0.989	0.32711	1	-0.185042	0.966	0.973	7.34556e-07	0.021842	-0.0891019	0.988	0.997	0.010363	1
Zmpste24	0.446602	0.582	0.328	1.12195e-05	0.333612	-0.201852	0.328	0.45	0.0288289	1	0.196105	0.529	0.583	0.559151	1	0.22443	0.572	0.52	0.100815	1	-0.139781	0.302	0.4	0.00172951	1	-0.074925	0.579	0.527	0.495434	1
Ccdc17	1.32121	0.219	0.058	1.12465e-05	0.334415	-0.737328	0.074	0.104	0.319486	1	-1.59332	0.102	0.204	0.0177943	1	0.100078	0.178	0.148	0.372619	1	-0.122375	0.066	0.089	0.140643	1	0.354277	0.182	0.126	0.0415649	1
Ap3b1	0.595712	0.479	0.243	1.12795e-05	0.335397	-1.1109	0.254	0.292	0.247778	1	0.623433	0.331	0.333	0.838795	1	0.357596	0.431	0.398	0.342913	1	0.409986	0.203	0.222	0.546316	1	0.686993	0.409	0.293	0.000679879	1
Rpap2	0.185521	0.363	0.143	1.1292e-05	0.335766	-0.936259	0.139	0.192	0.195893	1	0.0915483	0.217	0.204	0.834366	1	0.281181	0.29	0.173	0.000311842	1	0.710053	0.152	0.139	0.482558	1	0.213691	0.16	0.156	0.980736	1
9530082P21Rik	0.246274	0.712	0.481	1.1323e-05	0.336689	-0.145413	0.607	0.676	0.164878	1	-0.412304	0.637	0.796	0.00384544	1	0.162079	0.781	0.723	0.201354	1	-0.0359805	0.64	0.703	0.157634	1	-0.285283	0.737	0.806	0.00557443	1
Hacd2	0.935113	0.37	0.153	1.13262e-05	0.336786	0.0239088	0.238	0.258	0.562518	1	-0.230227	0.268	0.204	0.301562	1	0.0791881	0.323	0.358	0.576736	1	-0.387481	0.146	0.251	2.92183e-05	0.868805	0.252563	0.342	0.241	0.00259631	1
Ranbp6	0.79398	0.253	0.074	1.13375e-05	0.337122	-0.145655	0.107	0.094	0.716389	1	0.0633592	0.178	0.167	0.888948	1	0.822677	0.305	0.186	0.000196389	1	-0.00841443	0.084	0.091	0.697724	1	-0.179138	0.134	0.153	0.483942	1
Dpysl3	0.27095	0.5	0.243	1.13588e-05	0.337754	-0.316587	0.221	0.349	0.0121207	1	0.30748	0.363	0.389	0.639346	1	0.00161169	0.42	0.471	0.0418015	1	0.142574	0.206	0.277	0.00981007	1	0.0792984	0.376	0.357	0.412407	1
Kpna4	0.354788	0.486	0.243	1.14295e-05	0.339857	-0.14142	0.238	0.28	0.422396	1	0.57476	0.401	0.426	0.834189	1	0.309338	0.498	0.445	0.0448169	1	0.0428485	0.193	0.277	0.00353948	1	-0.421707	0.347	0.422	0.0367381	1
Frmd4a	0.241408	0.637	0.376	1.14974e-05	0.341876	0.473439	0.467	0.418	0.274941	1	-0.109042	0.465	0.63	0.0210023	1	0.0554101	0.55	0.513	0.146852	1	0.447093	0.304	0.296	0.596073	1	-0.441737	0.411	0.5	0.00443602	1
Dhx57	0.166453	0.356	0.138	1.16052e-05	0.345082	-0.182031	0.164	0.201	0.361343	1	-0.44591	0.287	0.38	0.0457869	1	0.428783	0.309	0.301	0.900049	1	-0.297946	0.107	0.168	0.0043485	1	0.26934	0.335	0.231	0.00644502	1
Atad3a	1.23634	0.288	0.101	1.16209e-05	0.345548	0.504002	0.221	0.233	0.928887	1	0.808796	0.287	0.176	0.0393271	1	0.187889	0.342	0.296	0.269068	1	0.291007	0.165	0.198	0.28978	1	0.188523	0.287	0.245	0.175152	1
Bcl6b	0.415157	0.815	0.582	1.16512e-05	0.346449	-0.240969	0.5	0.632	0.0154949	1	0.298503	0.624	0.454	0.0151334	1	-0.211099	0.736	0.726	0.462956	1	-0.395079	0.469	0.634	3.6703e-08	0.00109136	0.158298	0.533	0.544	0.978387	1
Ap1s1	0.258141	0.603	0.344	1.16897e-05	0.347592	0.337179	0.574	0.531	0.209101	1	0.241471	0.624	0.583	0.201522	1	0.0659461	0.61	0.591	0.791316	1	-0.0236586	0.405	0.514	0.00125106	1	-0.113473	0.641	0.565	0.161999	1
Rinl	-0.0485008	0.562	0.317	1.17235e-05	0.348597	-0.210444	0.238	0.346	0.043306	1	-0.640508	0.465	0.472	0.495061	1	-0.191444	0.55	0.487	0.717165	1	-0.396197	0.229	0.335	9.25801e-05	1	0.379136	0.498	0.425	0.0114509	1
Itgb4	1.64761	0.267	0.09	1.17265e-05	0.348687	-0.115822	0.049	0.154	0.00347832	1	-0.638967	0.159	0.13	0.487157	1	0.0914073	0.186	0.146	0.171187	1	-0.502726	0.062	0.124	0.000629755	1	1.01242	0.203	0.139	0.0212986	1
Armc8	0.0897697	0.521	0.265	1.17687e-05	0.349941	-0.223879	0.254	0.355	0.0685172	1	0.369674	0.369	0.333	0.712071	1	0.591031	0.535	0.476	0.0828592	1	-0.0671586	0.253	0.325	0.00842011	1	0.549902	0.433	0.364	0.0439887	1
Mxra7	0.589077	0.219	0.053	1.17919e-05	0.350631	0.238185	0.148	0.179	0.541568	1	-0.97022	0.268	0.454	0.000339483	1	-0.323067	0.167	0.21	0.142686	1	0.115383	0.073	0.082	0.598173	1	-0.520387	0.16	0.265	0.000810043	1
Pdcd6	0.121673	0.808	0.55	1.18616e-05	0.352704	-0.307375	0.598	0.698	0.0401238	1	-0.422112	0.669	0.852	0.000474102	1	-0.143139	0.781	0.792	0.364984	1	-0.068436	0.51	0.572	0.147997	1	-0.14472	0.734	0.796	0.559624	1
AW549877	0.399507	0.452	0.222	1.1863e-05	0.352746	-0.170862	0.205	0.258	0.272352	1	-0.20828	0.28	0.352	0.241947	1	-0.098551	0.513	0.425	0.0733975	1	0.0204227	0.206	0.218	0.757967	1	-0.289468	0.294	0.388	0.0142448	1
Trub1	-0.195615	0.233	0.063	1.18643e-05	0.352784	-1.95246	0.09	0.148	0.0777992	1	1.22704	0.102	0.157	0.200654	1	1.1875	0.193	0.144	0.107579	1	-0.927285	0.066	0.112	0.00659829	1	0.49485	0.163	0.173	0.845799	1
Pcgf3	0.734533	0.479	0.238	1.18688e-05	0.352917	-0.236747	0.205	0.296	0.0643436	1	0.566366	0.357	0.361	0.942404	1	0.316616	0.465	0.447	0.905574	1	-0.356925	0.167	0.268	0.000104447	1	-0.152305	0.318	0.279	0.252939	1
Zfp148	0.208593	0.473	0.238	1.1881e-05	0.353281	0.073751	0.328	0.349	0.885546	1	0.200274	0.363	0.481	0.0482225	1	0.159414	0.517	0.473	0.26872	1	0.0490566	0.261	0.299	0.341359	1	-0.126856	0.366	0.395	0.426917	1
Slc12a9	0.43971	0.308	0.111	1.19665e-05	0.355824	-0.127348	0.123	0.142	0.670549	1	-1.46197	0.14	0.25	0.0161035	1	0.377181	0.275	0.173	0.00140512	1	0.66022	0.188	0.136	0.00850805	1	-0.493954	0.134	0.201	0.0150644	1
Dennd6a	0.501048	0.63	0.36	1.19716e-05	0.355974	-0.299602	0.287	0.459	0.00286689	1	-0.684272	0.42	0.62	0.000771791	1	0.422748	0.61	0.511	0.0151369	1	-0.155167	0.246	0.316	0.0201414	1	-0.363898	0.459	0.592	0.000334076	1
Copb1	0.405707	0.726	0.524	1.20168e-05	0.357318	-0.103231	0.508	0.582	0.130321	1	-0.0423907	0.656	0.593	0.991318	1	0.108744	0.717	0.681	0.629147	1	0.0806086	0.422	0.521	0.0129819	1	0.24451	0.648	0.639	0.652136	1
Ptpn14	0.297556	0.473	0.228	1.2106e-05	0.359971	0.448887	0.361	0.286	0.0996709	1	0.476197	0.382	0.361	0.422556	1	0.361794	0.465	0.374	0.00818202	1	0.146104	0.203	0.261	0.0426671	1	0.192029	0.335	0.361	0.55635	1
Lyl1	0.876731	0.37	0.159	1.21161e-05	0.360272	0.393125	0.221	0.16	0.125118	1	-0.29927	0.223	0.213	0.861288	1	0.890005	0.297	0.254	0.171594	1	0.984868	0.189	0.134	0.00857025	1	-0.305939	0.201	0.252	0.0862399	1
Zfp788	0.329731	0.253	0.074	1.21214e-05	0.360431	-1.31208	0.074	0.154	0.0209322	1	-0.181588	0.197	0.139	0.245913	1	1.14375	0.197	0.159	0.146526	1	-0.873341	0.032	0.105	2.27994e-06	0.067794	0.617218	0.206	0.112	0.000745566	1
Iscu	0.112952	0.877	0.598	1.21682e-05	0.361823	-0.156954	0.541	0.752	0.00404521	1	-0.0876727	0.713	0.731	0.653737	1	-0.352023	0.807	0.763	0.600578	1	-0.417698	0.507	0.684	1.21275e-08	0.000360612	-0.411784	0.761	0.827	0.00245155	1
Ubl3	0.153957	0.884	0.624	1.21813e-05	0.36221	-0.148559	0.615	0.711	0.208314	1	-0.232336	0.777	0.843	0.165499	1	-0.0148924	0.822	0.788	0.309017	1	0.249153	0.546	0.577	0.895157	1	0.247204	0.799	0.789	0.407091	1
Gm19967	-0.251992	0.014	0.153	1.22341e-05	0.363782	-0.0403498	0.041	0.069	0.27384	1	0.0388285	0.051	0.037	0.588477	1	-0.28372	0.004	0.102	2.42784e-07	0.00721918	0.0427394	0.066	0.062	0.746281	1	0.103043	0.086	0.01	1.34149e-05	0.398891
Fopnl	0.192245	0.473	0.228	1.22573e-05	0.36447	-0.349847	0.246	0.371	0.0160125	1	0.0320157	0.516	0.481	0.773073	1	-0.159085	0.435	0.473	0.208713	1	-0.249491	0.235	0.314	0.00287451	1	0.116602	0.469	0.548	0.122546	1
Fastk	0.140311	0.568	0.312	1.22805e-05	0.36516	0.168154	0.459	0.459	0.810627	1	-0.084702	0.516	0.481	0.489667	1	0.0401759	0.572	0.586	0.187034	1	0.142774	0.37	0.442	0.0855597	1	0.307307	0.524	0.473	0.110399	1
Pphln1	-0.000210776	0.514	0.259	1.23042e-05	0.365865	-0.0444487	0.246	0.28	0.579487	1	0.0846494	0.395	0.37	0.978459	1	1.05655	0.506	0.312	1.07305e-07	0.00319072	-0.272002	0.146	0.22	0.00151345	1	0.161577	0.34	0.347	0.811777	1
Rprd2	0.000956369	0.26	0.074	1.2339e-05	0.3669	0.106234	0.156	0.198	0.319133	1	-0.302648	0.178	0.296	0.0305945	1	0.275758	0.26	0.204	0.0943292	1	0.418809	0.144	0.12	0.191624	1	-0.749419	0.196	0.316	9.67252e-05	1
Gm15475	0.638848	0.39	0.18	1.24189e-05	0.369277	0.4733	0.303	0.292	0.79274	1	-0.437403	0.287	0.38	0.0445245	1	0.353407	0.357	0.261	0.00123059	1	0.312651	0.28	0.211	0.00554115	1	-0.373108	0.227	0.381	9.34961e-07	0.0278011
Ing4	0.46576	0.582	0.302	1.24236e-05	0.369417	0.148389	0.369	0.428	0.426313	1	-0.0178775	0.465	0.426	0.835047	1	0.153407	0.532	0.558	0.503571	1	-0.165424	0.37	0.402	0.351635	1	0.230281	0.498	0.486	0.733044	1
Vps72	0.264478	0.719	0.423	1.25436e-05	0.372983	0.352037	0.516	0.491	0.3864	1	-0.271639	0.548	0.657	0.0603124	1	-0.103692	0.647	0.628	0.270936	1	0.275264	0.535	0.505	0.0844543	1	-0.00402275	0.589	0.633	0.465197	1
Adgrg1	0.302709	0.849	0.646	1.25909e-05	0.374389	0.309704	0.721	0.689	0.150354	1	-0.245467	0.783	0.796	0.123228	1	0.554372	0.862	0.719	4.94765e-07	0.0147118	0.636905	0.735	0.624	3.84049e-08	0.00114197	-0.222093	0.727	0.803	0.00875614	1
Slc30a6	0.151867	0.411	0.175	1.26687e-05	0.376704	-0.197753	0.172	0.239	0.170408	1	0.0831226	0.28	0.361	0.168589	1	0.105771	0.39	0.325	0.154248	1	0.0791304	0.144	0.208	0.00863274	1	0.753986	0.337	0.248	0.00743909	1
Sin3a	0.457313	0.452	0.217	1.27467e-05	0.379024	0.0337603	0.32	0.305	0.943726	1	0.0957091	0.401	0.435	0.367134	1	0.469442	0.476	0.321	9.62815e-05	1	-0.125007	0.182	0.301	2.21905e-05	0.659833	-0.192898	0.388	0.412	0.23731	1
Npnt	-0.337086	0.534	0.323	1.27612e-05	0.379454	-0.602433	0.18	0.321	0.0013908	1	-0.0259213	0.338	0.37	0.55753	1	-0.545283	0.617	0.529	0.467876	1	-0.104182	0.144	0.318	1.58797e-12	4.72184e-08	-0.270516	0.364	0.412	0.933429	1
Erc1	1.00601	0.466	0.249	1.27788e-05	0.379976	-0.698572	0.262	0.311	0.193773	1	-0.158592	0.325	0.398	0.155042	1	0.802101	0.535	0.35	3.39955e-06	0.101086	-0.168982	0.189	0.271	0.00387535	1	0.328315	0.373	0.374	0.542427	1
Pan3	0.295231	0.527	0.28	1.27989e-05	0.380576	-0.320842	0.279	0.371	0.0432329	1	-0.553779	0.414	0.583	0.000249757	1	-0.161478	0.442	0.458	0.703046	1	-0.0772775	0.212	0.251	0.186639	1	-0.255693	0.426	0.466	0.157777	1
Nebl	0.733961	0.397	0.169	1.28215e-05	0.381246	1.04739	0.197	0.145	0.161446	1	0.693741	0.242	0.259	0.799062	1	-0.37667	0.361	0.181	7.47931e-08	0.00222397	1.08761	0.116	0.105	0.475794	1	-0.173068	0.232	0.303	0.0273867	1
Nes	0.783637	0.5	0.265	1.29563e-05	0.385256	0.0506281	0.41	0.481	0.209469	1	-0.894701	0.439	0.546	0.0162734	1	0.297888	0.543	0.518	0.926016	1	0.0851549	0.388	0.421	0.275007	1	0.0509714	0.352	0.469	0.0112981	1
Mrps9	-0.00351376	0.5	0.249	1.29725e-05	0.385737	-0.212317	0.246	0.305	0.247586	1	-0.465941	0.236	0.407	0.00552421	1	-0.130324	0.428	0.48	0.0761179	1	0.32348	0.214	0.21	0.663781	1	0.00760081	0.359	0.337	0.469419	1
Zfp248	0.417382	0.349	0.143	1.29886e-05	0.386216	0.614476	0.18	0.135	0.18879	1	-0.838822	0.204	0.25	0.325434	1	0.544931	0.234	0.192	0.160089	1	0.181989	0.131	0.137	0.963068	1	0.419605	0.187	0.221	0.300538	1
Rab33b	-0.142766	0.507	0.249	1.31457e-05	0.390886	-0.294926	0.238	0.299	0.164504	1	0.860579	0.331	0.352	0.84445	1	0.334162	0.483	0.281	6.01645e-08	0.00178899	-0.1215	0.184	0.22	0.130706	1	0.0892791	0.352	0.299	0.183797	1
Crbn	0.105096	0.623	0.36	1.32032e-05	0.392597	-0.297295	0.344	0.434	0.0996564	1	0.13246	0.554	0.593	0.62137	1	0.00438654	0.625	0.633	0.716055	1	-0.0554638	0.317	0.416	0.00414751	1	0.271433	0.596	0.51	0.0514987	1
AW112010	-0.305276	0.548	0.354	1.32922e-05	0.395243	0.578959	0.467	0.535	0.459014	1	-0.139895	0.503	0.62	0.170944	1	-0.148222	0.807	0.801	0.712605	1	-0.268791	0.645	0.739	0.00249121	1	-0.169831	0.751	0.82	0.130368	1
Cx3cl1	0.461068	0.959	0.868	1.33072e-05	0.395689	0.367269	0.951	0.962	0.0738283	1	-0.228154	0.968	0.981	0.0459662	1	0.351026	0.885	0.883	0.00114568	1	0.0168077	0.826	0.863	0.734176	1	0.306803	0.935	0.956	0.0453766	1
Srsf1	0.30669	0.466	0.222	1.3343e-05	0.396754	-0.530992	0.303	0.318	0.587371	1	-0.357239	0.395	0.463	0.106803	1	0.0872049	0.45	0.398	0.293023	1	0.0304379	0.231	0.311	0.00944469	1	-0.43703	0.344	0.425	0.0138653	1
Nxt2	-0.0947873	0.281	0.095	1.33528e-05	0.397044	0.62831	0.148	0.107	0.247887	1	-1.03379	0.153	0.213	0.181016	1	0.454045	0.335	0.188	3.60486e-06	0.107191	-0.372196	0.086	0.108	0.209945	1	0.704569	0.22	0.163	0.0380481	1
Gm10557	0.556627	0.377	0.169	1.3399e-05	0.39842	-0.0456714	0.221	0.239	0.700779	1	0.161492	0.287	0.333	0.614995	1	0.283494	0.316	0.206	0.00064281	1	-0.117477	0.137	0.191	0.0200717	1	-0.0218131	0.242	0.282	0.211	1
Kat5	0.60331	0.466	0.243	1.34402e-05	0.399645	-0.588001	0.254	0.311	0.178985	1	0.142377	0.28	0.37	0.189155	1	-0.18461	0.387	0.354	0.434351	1	0.0342416	0.285	0.258	0.248873	1	-0.0417666	0.337	0.361	0.499605	1
Fbxo18	-0.12322	0.582	0.312	1.35093e-05	0.401699	-0.294367	0.262	0.355	0.126387	1	0.225984	0.439	0.426	0.696315	1	0.419849	0.561	0.533	0.172215	1	0.409952	0.347	0.363	0.847014	1	-0.121344	0.443	0.48	0.339187	1
Asap1	0.182815	0.89	0.656	1.35435e-05	0.402717	0.317771	0.689	0.714	0.473258	1	-0.230413	0.688	0.833	0.0175283	1	0.189199	0.836	0.801	0.00929401	1	0.0591115	0.632	0.639	0.893123	1	-0.146156	0.749	0.813	0.0023802	1
Ypel5	-0.0517916	0.808	0.513	1.35579e-05	0.403145	-0.480426	0.525	0.651	0.00682269	1	-0.453015	0.624	0.741	0.00774362	1	0.0469634	0.792	0.774	0.166142	1	-0.253345	0.48	0.619	0.000400183	1	0.0461258	0.711	0.677	0.569338	1
B3galt6	0.473757	0.301	0.111	1.35917e-05	0.404148	-0.850507	0.107	0.214	0.00710535	1	1.05755	0.248	0.139	0.0247766	1	-0.151415	0.238	0.308	0.0260649	1	-0.996815	0.079	0.198	1.10047e-08	0.000327226	0.368486	0.232	0.146	0.00547765	1
Slc35a5	0.64078	0.308	0.111	1.35922e-05	0.404164	-0.270866	0.164	0.176	0.668753	1	0.669431	0.14	0.12	0.617783	1	0.199008	0.234	0.192	0.186893	1	-0.577193	0.058	0.125	0.000115695	1	1.05403	0.256	0.177	0.00977863	1
Cops3	-0.0751399	0.63	0.376	1.36116e-05	0.40474	-0.0308704	0.385	0.459	0.222159	1	-0.18555	0.459	0.5	0.408741	1	-0.373849	0.617	0.606	0.999544	1	0.320865	0.306	0.397	0.0195348	1	0.343993	0.526	0.405	0.00192412	1
Kifap3	0.487442	0.411	0.175	1.36651e-05	0.406331	-0.111518	0.23	0.292	0.208484	1	-0.215008	0.318	0.352	0.491341	1	0.427757	0.398	0.259	0.000267404	1	-0.293643	0.205	0.254	0.0521762	1	-0.0671814	0.323	0.337	0.689371	1
Sh3bgrl	0.105442	0.877	0.651	1.37476e-05	0.408786	0.171566	0.664	0.758	0.727524	1	-0.265895	0.739	0.806	0.0013147	1	0.268938	0.874	0.838	0.00647229	1	0.0227397	0.57	0.667	0.0381124	1	0.450808	0.778	0.786	0.378938	1
Cyth2	0.398101	0.753	0.545	1.38069e-05	0.410549	-0.0610939	0.607	0.616	0.996902	1	0.325544	0.669	0.667	0.582843	1	-0.36274	0.68	0.728	0.0197132	1	0.131197	0.529	0.596	0.292838	1	0.0416745	0.66	0.687	0.934081	1
Alg2	0.556329	0.418	0.19	1.38163e-05	0.410828	0.527574	0.205	0.233	0.652165	1	-0.753335	0.287	0.398	0.0236296	1	0.263527	0.439	0.396	0.292725	1	-0.39939	0.176	0.235	0.0137462	1	0.449949	0.433	0.344	0.0088532	1
Taok3	0.251346	0.397	0.169	1.38874e-05	0.412942	0.8576	0.156	0.252	0.0655631	1	0.763835	0.344	0.361	0.848245	1	0.285949	0.387	0.288	0.0041871	1	-0.866975	0.109	0.187	0.000199442	1	-0.582921	0.263	0.269	0.969035	1
Gm4790	1.69095	0.123	0.011	1.38979e-05	0.413253	0.0532591	0.074	0.104	0.36625	1	0.945216	0.108	0.093	0.687405	1	0.582683	0.104	0.064	0.0556364	1	-0.338069	0.047	0.06	0.328679	1	0.112676	0.136	0.092	0.0915658	1
Egfl7	0.221422	1	1	1.39083e-05	0.413563	0.182775	1	1	5.02006e-05	1	-0.225903	1	1	1.89853e-07	0.00564528	0.0175622	1	1	0.786243	1	0.0571774	1	1	0.0494313	1	-0.0496763	1	1	0.0918238	1
Nos2	0.590747	0.418	0.196	1.39253e-05	0.414068	-0.0241796	0.279	0.336	0.226407	1	-0.0607651	0.325	0.37	0.372945	1	0.276895	0.368	0.378	0.585036	1	-0.914691	0.124	0.223	1.14492e-05	0.340441	-0.460936	0.234	0.19	0.116151	1
Acap2	0.105265	0.692	0.418	1.39777e-05	0.415626	0.191195	0.443	0.425	0.777492	1	-0.00855255	0.516	0.63	0.0428272	1	0.241713	0.68	0.577	0.00117742	1	0.254974	0.371	0.387	0.983142	1	-0.25212	0.553	0.69	0.000429862	1
Gabpa	0.628934	0.849	0.587	1.40452e-05	0.417633	0.00358002	0.689	0.767	0.271361	1	0.0282505	0.739	0.796	0.48779	1	-0.0338758	0.766	0.754	0.536755	1	0.108193	0.623	0.655	0.310964	1	-0.406696	0.701	0.789	0.000434385	1
Atp9a	0.00197456	0.664	0.37	1.41046e-05	0.419401	0.409691	0.377	0.522	0.0999602	1	-0.0599882	0.535	0.565	0.249795	1	0.0710141	0.606	0.615	0.0992267	1	-0.0323231	0.385	0.45	0.060338	1	0.0582657	0.577	0.537	0.189238	1
Gm20532	0.239279	1	0.979	1.41259e-05	0.420035	0.197322	1	0.991	0.000119985	1	-0.230894	1	1	1.10527e-07	0.00328652	0.0288029	0.996	0.976	0.380093	1	0.127641	0.996	0.998	0.000170927	1	-0.0858026	0.998	0.986	0.0254634	1
Stxbp3	0.180609	0.61	0.339	1.41381e-05	0.420398	0.188319	0.287	0.374	0.131197	1	0.0187287	0.529	0.417	0.204909	1	0.244258	0.587	0.489	0.00725066	1	-0.357028	0.274	0.361	0.00196775	1	0.415376	0.481	0.415	0.0592289	1
Colgalt1	0.0792459	0.795	0.571	1.41967e-05	0.422139	0.117956	0.557	0.689	0.138678	1	-0.151756	0.605	0.611	0.806577	1	0.102434	0.699	0.692	0.728623	1	0.255825	0.49	0.555	0.155715	1	0.265206	0.653	0.517	0.00023443	1
Fuca1	0.041816	0.699	0.439	1.42549e-05	0.423871	-0.118535	0.639	0.638	0.851967	1	-0.226554	0.688	0.787	0.0265652	1	0.305747	0.721	0.684	0.496176	1	0.285269	0.623	0.605	0.0531094	1	0.0611566	0.749	0.772	0.498038	1
Klhl21	1.13131	0.466	0.228	1.43017e-05	0.425261	0.510227	0.352	0.311	0.438528	1	0.580528	0.382	0.315	0.237358	1	0.437593	0.424	0.392	0.468595	1	-0.0582381	0.21	0.215	0.881451	1	0.173382	0.316	0.262	0.0485625	1
Dhh	0.408177	0.411	0.19	1.43328e-05	0.426185	-0.943404	0.189	0.292	0.0105058	1	0.346262	0.217	0.306	0.119864	1	-0.265878	0.428	0.381	0.205563	1	0.110012	0.099	0.229	1.4326e-08	0.000425982	0.837355	0.299	0.238	0.0234739	1
Psmd3	0.161761	0.904	0.646	1.44188e-05	0.428744	0.219998	0.82	0.78	0.367325	1	0.275593	0.726	0.639	0.260178	1	0.0602173	0.807	0.79	0.676836	1	0.392531	0.816	0.804	0.00259402	1	0.115482	0.687	0.741	0.426435	1
Ammecr1l	0.439097	0.459	0.243	1.45254e-05	0.431914	0.0769179	0.238	0.255	0.775432	1	0.686093	0.369	0.361	0.712535	1	-0.465445	0.439	0.447	0.612233	1	-0.301112	0.146	0.223	0.00120993	1	0.0936356	0.306	0.337	0.529095	1
Naglu	0.619402	0.418	0.201	1.45734e-05	0.433341	0.120149	0.402	0.336	0.295981	1	-0.189873	0.331	0.407	0.0768444	1	0.405132	0.494	0.381	0.00303821	1	0.19315	0.343	0.337	0.625675	1	-0.393451	0.349	0.449	0.017869	1
Camta2	0.461282	0.5	0.243	1.45744e-05	0.433369	0.0694385	0.418	0.371	0.323739	1	-0.554895	0.382	0.472	0.0453559	1	0.114697	0.442	0.425	0.658043	1	-0.374441	0.223	0.284	0.0298034	1	-0.431176	0.366	0.439	0.0259703	1
Leng8	0.0951242	0.801	0.608	1.46653e-05	0.436071	0.0483838	0.664	0.739	0.484683	1	0.366996	0.822	0.769	0.254698	1	0.224339	0.792	0.788	0.236686	1	-0.0176253	0.636	0.718	0.0142195	1	-0.0667858	0.809	0.827	0.260586	1
Scamp2	0.36072	0.719	0.476	1.47934e-05	0.439881	-0.399217	0.492	0.547	0.227012	1	0.492896	0.605	0.5	0.0933973	1	0.289768	0.68	0.653	0.571083	1	0.298599	0.522	0.555	0.914141	1	0.172953	0.612	0.554	0.182374	1
Tcta	0.0931679	0.719	0.46	1.47942e-05	0.439905	-0.236027	0.402	0.535	0.0205966	1	0.150131	0.618	0.657	0.803833	1	-0.442473	0.654	0.677	0.212646	1	0.0391609	0.405	0.479	0.0575282	1	0.332925	0.687	0.578	0.0140027	1
Plin3	0.206314	0.664	0.376	1.49116e-05	0.443397	-0.274873	0.402	0.469	0.359007	1	-0.410803	0.541	0.63	0.092899	1	-0.381721	0.524	0.602	0.0766939	1	-0.0210314	0.345	0.419	0.0121787	1	0.0654961	0.557	0.507	0.11932	1
Chst12	0.0236176	0.521	0.275	1.49483e-05	0.444487	0.140067	0.27	0.403	0.0171524	1	-0.180582	0.42	0.38	0.739456	1	0.812721	0.621	0.513	0.0018729	1	0.0793586	0.356	0.395	0.383646	1	0.596116	0.474	0.429	0.0259441	1
Plp2	-0.0517569	0.404	0.169	1.50481e-05	0.447456	-0.104898	0.221	0.289	0.146355	1	0.324226	0.293	0.315	0.649224	1	0.164306	0.431	0.485	0.367205	1	-0.0503439	0.296	0.347	0.173633	1	0.261821	0.371	0.327	0.1625	1
Nenf	0.256566	0.712	0.413	1.50511e-05	0.447545	-0.363077	0.459	0.629	0.00315726	1	-0.584709	0.58	0.713	0.0106705	1	-0.212894	0.68	0.588	0.162319	1	-0.251183	0.364	0.479	0.000888344	1	-0.381855	0.591	0.673	0.0586643	1
Pkp4	-0.052012	0.404	0.19	1.50532e-05	0.447608	0.351481	0.164	0.189	0.538032	1	-1.09115	0.178	0.259	0.118287	1	0.404323	0.364	0.369	0.645008	1	-0.34393	0.113	0.177	0.00246096	1	0.151514	0.309	0.248	0.0818029	1
Gm38366	0.214149	0.137	0.016	1.50688e-05	0.44807	-0.0066712	0.057	0.066	0.778655	1	-0.0729574	0.076	0.102	0.452292	1	0.0287858	0.086	0.093	0.772485	1	0.0557321	0.047	0.072	0.0878165	1	0.00718201	0.053	0.133	0.000274311	1
Mllt4	0.494144	0.63	0.386	1.50906e-05	0.448719	0.0697767	0.385	0.459	0.262633	1	-0.238444	0.49	0.611	0.0592716	1	-0.0363114	0.576	0.584	0.71046	1	-0.103635	0.326	0.397	0.02183	1	-0.259729	0.545	0.595	0.0302563	1
Cwc22	0.492042	0.349	0.143	1.51496e-05	0.450473	0.19079	0.131	0.192	0.1583	1	-0.153165	0.191	0.259	0.228162	1	-0.0502157	0.275	0.283	0.822846	1	-0.0167064	0.133	0.144	0.608548	1	0.663812	0.28	0.204	0.0252924	1
RP23-4F16.14	0.331268	0.26	0.085	1.51573e-05	0.450701	0.0175377	0.115	0.119	0.985102	1	-0.162563	0.14	0.296	0.00313543	1	0.92027	0.19	0.142	0.113745	1	-0.262097	0.051	0.101	0.00159561	1	-0.299814	0.122	0.235	8.07714e-05	1
Cdyl2	0.0985987	0.322	0.116	1.51984e-05	0.451924	-0.184648	0.139	0.186	0.210414	1	0.557927	0.159	0.222	0.248049	1	-0.151922	0.264	0.35	0.0101571	1	-0.522893	0.154	0.244	0.000486616	1	0.140416	0.215	0.184	0.418923	1
Pkn1	1.04909	0.432	0.212	1.52345e-05	0.452998	0.230051	0.336	0.403	0.233446	1	-0.293607	0.325	0.417	0.120822	1	-0.688191	0.349	0.396	0.185799	1	-0.253118	0.24	0.369	8.10247e-06	0.240927	0.335195	0.388	0.374	0.909827	1
Cisd2	0.137843	0.479	0.217	1.53065e-05	0.455138	-0.19978	0.295	0.346	0.252103	1	0.349004	0.274	0.213	0.205383	1	-0.00600427	0.502	0.52	0.338573	1	-0.356559	0.225	0.28	0.0335508	1	0.0254419	0.39	0.313	0.0559122	1
Shkbp1	0.730862	0.473	0.228	1.53097e-05	0.455235	0.456963	0.352	0.381	0.858311	1	-0.144566	0.318	0.361	0.335972	1	0.5664	0.424	0.347	0.0200923	1	0.108436	0.285	0.335	0.154157	1	-0.184359	0.285	0.388	0.0051206	1
Grsf1	0.641376	0.329	0.132	1.54943e-05	0.460722	0.0173032	0.197	0.305	0.032335	1	0.151116	0.268	0.269	0.939953	1	0.0950177	0.364	0.338	0.752907	1	-0.154143	0.152	0.278	3.45483e-07	0.0102729	-0.0184312	0.28	0.255	0.582705	1
Edil3	0.875351	0.267	0.085	1.5535e-05	0.461932	-1.21619	0.074	0.135	0.0692896	1	-0.202899	0.153	0.204	0.243907	1	0.434596	0.227	0.177	0.11307	1	-0.527751	0.058	0.122	0.000239567	1	-0.143925	0.139	0.139	0.995828	1
Alox5ap	0.446836	0.26	0.079	1.55495e-05	0.462364	0.40556	0.189	0.211	0.78918	1	-0.27315	0.236	0.259	0.533131	1	-0.6831	0.093	0.204	3.33421e-05	0.991427	0.511876	0.03	0.069	0.00312326	1	-0.655702	0.117	0.129	0.726589	1
Gm9905	0.599178	0.418	0.19	1.572e-05	0.467434	0.0912165	0.205	0.308	0.104106	1	-0.0533303	0.35	0.398	0.504257	1	-0.360387	0.346	0.394	0.184231	1	-0.0508977	0.22	0.28	0.0335459	1	-0.0361629	0.347	0.374	0.368417	1
Klf10	0.134362	0.836	0.577	1.57278e-05	0.467667	0.041661	0.582	0.698	0.111126	1	0.595665	0.777	0.667	0.021819	1	-0.118993	0.803	0.774	0.409749	1	-0.125282	0.447	0.543	0.00872734	1	1.28012	0.861	0.578	1.99938e-22	5.94516e-18
Pcdhb7	1.65644	0.123	0.011	1.57618e-05	0.468676	-0.438115	0.074	0.06	0.646079	1	0.689367	0.102	0.148	0.298792	1	0.738233	0.13	0.031	4.0715e-07	0.0121066	-0.562712	0.019	0.038	0.0594118	1	-0.649893	0.077	0.085	0.592008	1
Bre	0.129009	0.781	0.524	1.57624e-05	0.468696	-0.151338	0.5	0.657	0.0137077	1	-0.0966554	0.662	0.62	0.973375	1	0.0128877	0.684	0.69	0.941783	1	0.193298	0.488	0.512	0.783229	1	0.0152264	0.639	0.67	0.480189	1
Pcmtd1	0.283124	0.589	0.333	1.58301e-05	0.470708	-0.340405	0.303	0.434	0.0198079	1	-0.0187978	0.484	0.537	0.289813	1	0.408186	0.688	0.626	0.0717217	1	-0.14131	0.317	0.414	0.00496442	1	-0.268978	0.548	0.684	0.000499853	1
Gm26809	0.375456	0.705	0.45	1.58404e-05	0.471015	-0.31128	0.574	0.588	0.363864	1	0.148719	0.694	0.722	0.844766	1	0.341975	0.818	0.677	4.45457e-06	0.132457	-0.0114798	0.522	0.608	0.0487157	1	-0.190103	0.754	0.827	0.00565127	1
Bmp6	0.333775	0.527	0.259	1.58552e-05	0.471455	0.386595	0.41	0.368	0.261588	1	-0.400971	0.42	0.676	0.000318378	1	0.108684	0.331	0.226	0.00384842	1	0.218945	0.126	0.148	0.279606	1	-0.527813	0.167	0.306	9.31786e-06	0.277067
Gtf2h4	0.867758	0.253	0.079	1.59209e-05	0.473407	-0.400557	0.115	0.182	0.0941566	1	0.120064	0.217	0.241	0.578674	1	-0.196677	0.212	0.268	0.0617269	1	-0.136106	0.129	0.174	0.0574123	1	0.189423	0.201	0.177	0.465599	1
Znfx1	0.14313	0.719	0.466	1.5924e-05	0.473501	0.423301	0.516	0.544	0.639935	1	0.415248	0.484	0.63	0.0406978	1	0.386404	0.71	0.673	0.0705338	1	0.094572	0.486	0.538	0.0998529	1	-0.24806	0.62	0.684	0.00095043	1
Pex2	-0.14659	0.589	0.307	1.60417e-05	0.477001	0.147064	0.295	0.403	0.0669444	1	0.0432546	0.439	0.481	0.415397	1	0.114474	0.55	0.533	0.503957	1	-0.0542365	0.291	0.354	0.0397748	1	-0.0320505	0.533	0.49	0.563222	1
Gm20481	-0.449006	0.945	0.974	1.60636e-05	0.47765	-0.571793	0.549	0.928	3.30882e-11	9.83877e-07	0.559709	0.917	0.722	1.4848e-05	0.441506	-0.587017	0.829	0.927	1.55734e-08	0.000463075	-0.599389	0.51	0.833	4.58511e-27	1.36338e-22	0.779771	0.809	0.728	9.6729e-07	0.0287624
Cog8	0.276865	0.726	0.487	1.60769e-05	0.478046	0.185154	0.59	0.695	0.297127	1	0.192167	0.707	0.667	0.566138	1	-0.104981	0.695	0.748	0.0860906	1	0.0458784	0.548	0.607	0.112319	1	-0.348277	0.694	0.772	0.00731794	1
Dag1	0.224362	0.822	0.598	1.60819e-05	0.478196	0.135917	0.672	0.682	0.711997	1	0.281642	0.707	0.759	0.754854	1	0.519932	0.796	0.728	0.00126115	1	-0.0503421	0.546	0.625	0.0413683	1	0.224931	0.711	0.714	0.211256	1
Erp29	0.101902	0.781	0.519	1.61561e-05	0.480402	0.107504	0.533	0.73	0.00531564	1	-0.0252027	0.637	0.593	0.64022	1	0.178571	0.747	0.697	0.271382	1	-0.0949255	0.58	0.656	0.0101386	1	0.14514	0.679	0.653	0.324299	1
Rxra	-0.919503	0.295	0.095	1.62488e-05	0.48316	0.895927	0.18	0.129	0.141409	1	0.0900276	0.217	0.241	0.661852	1	0.151802	0.294	0.226	0.0464941	1	0.152873	0.171	0.122	0.0238972	1	-0.205558	0.191	0.19	0.96923	1
Pml	0.184114	0.568	0.317	1.62583e-05	0.483441	-0.162132	0.328	0.472	0.00826915	1	0.3386	0.459	0.546	0.157314	1	0.636005	0.606	0.482	0.000805952	1	0.284881	0.355	0.383	0.611828	1	-0.0547888	0.478	0.537	0.18356	1
Gstm2	0.145535	0.616	0.339	1.627e-05	0.483789	0.291106	0.574	0.541	0.267782	1	-0.33324	0.605	0.704	0.101788	1	-0.236361	0.535	0.538	0.706947	1	0.126133	0.31	0.364	0.0989098	1	-0.110794	0.593	0.609	0.921532	1
Man2b1	0.214055	0.808	0.545	1.62891e-05	0.484357	-0.167174	0.705	0.686	0.564639	1	-0.34513	0.669	0.796	0.0201862	1	0.414038	0.788	0.699	0.000311739	1	0.193355	0.578	0.622	0.454497	1	0.21474	0.684	0.718	0.844548	1
Vps53	0.149615	0.575	0.307	1.63774e-05	0.486983	-0.291012	0.328	0.453	0.0418506	1	0.241738	0.561	0.509	0.558203	1	0.00569435	0.591	0.518	0.0716256	1	0.0562482	0.323	0.418	0.0063515	1	-0.0359318	0.474	0.412	0.0906838	1
Nemf	0.289141	0.568	0.317	1.6445e-05	0.488993	-0.0895098	0.246	0.44	0.000772956	1	-0.511094	0.42	0.5	0.063453	1	0.0866525	0.587	0.535	0.3194	1	-0.547454	0.218	0.373	7.62359e-09	0.000226687	0.00921133	0.486	0.446	0.455402	1
C1qtnf9	-0.688888	0.171	0.032	1.65774e-05	0.492928	0.695533	0.041	0.069	0.293732	1	1.41954	0.051	0.083	0.321742	1	-0.060514	0.223	0.135	0.00202141	1	0.113965	0.028	0.074	0.000739641	1	0.376036	0.062	0.044	0.311905	1
Cyb561	1.23185	0.322	0.132	1.65861e-05	0.493189	0.0204477	0.197	0.252	0.301156	1	-0.132151	0.185	0.287	0.0661584	1	-0.398541	0.208	0.223	0.450694	1	-0.80061	0.066	0.149	6.5584e-06	0.195014	0.34805	0.199	0.109	0.00146411	1
Polg	0.119205	0.459	0.212	1.6625e-05	0.494343	-0.0346474	0.32	0.336	0.854044	1	0.0462678	0.331	0.324	0.968829	1	0.313706	0.42	0.418	0.710057	1	0.490608	0.253	0.22	0.227349	1	0.0344629	0.337	0.367	0.49022	1
Car7	0.373372	0.678	0.529	1.67247e-05	0.497309	-0.464346	0.598	0.686	0.142103	1	-1.37865	0.732	0.722	0.416128	1	-0.0437922	0.836	0.832	0.104363	1	0.257064	0.702	0.711	0.384206	1	-0.0176372	0.813	0.793	0.314732	1
Ngfrap1	-0.0160404	0.548	0.28	1.68094e-05	0.499829	-0.092233	0.32	0.519	0.00203268	1	-0.411732	0.452	0.519	0.282571	1	-0.625621	0.502	0.595	0.000207623	1	-0.187269	0.338	0.428	0.00667967	1	-0.0115079	0.531	0.558	0.897336	1
Golga5	0.265613	0.568	0.296	1.68912e-05	0.50226	-0.194154	0.361	0.371	0.76659	1	0.298534	0.497	0.435	0.700157	1	0.114115	0.58	0.542	0.85414	1	-0.0522858	0.242	0.321	0.00767327	1	0.324408	0.493	0.432	0.0530305	1
Gna12	0.284328	0.493	0.243	1.6966e-05	0.504483	-0.41713	0.164	0.186	0.501902	1	0.635664	0.35	0.296	0.26836	1	0.434923	0.435	0.403	0.270748	1	0.0193447	0.182	0.191	0.894392	1	0.0670577	0.359	0.31	0.266581	1
Rab3d	0.409285	0.425	0.196	1.70431e-05	0.506776	-0.0390353	0.246	0.22	0.660825	1	-0.341267	0.344	0.417	0.233738	1	0.39949	0.42	0.323	0.0141487	1	-0.550269	0.195	0.244	0.0500233	1	-0.0681698	0.359	0.408	0.211862	1
Capn15	1.06584	0.171	0.032	1.70934e-05	0.508273	-0.316068	0.09	0.167	0.0484224	1	0.409043	0.153	0.167	0.735801	1	0.0547683	0.182	0.157	0.37871	1	-0.300055	0.06	0.134	5.35551e-05	1	0.143241	0.158	0.122	0.155632	1
Yipf3	-0.110677	0.76	0.481	1.71716e-05	0.510599	0.137686	0.615	0.708	0.455306	1	-0.512878	0.656	0.676	0.082107	1	0.0220522	0.784	0.697	0.158788	1	0.30557	0.653	0.663	0.187313	1	0.00131399	0.684	0.646	0.466739	1
Leprotl1	0.320141	0.63	0.376	1.72793e-05	0.5138	-0.0132801	0.418	0.406	0.744271	1	-0.000772147	0.58	0.537	0.566341	1	0.0266325	0.662	0.657	0.905397	1	0.243612	0.386	0.385	0.756368	1	-0.0385723	0.603	0.622	0.85696	1
Tmem104	-0.209806	0.336	0.127	1.73026e-05	0.514494	0.442519	0.295	0.267	0.479329	1	0.46912	0.229	0.222	0.870052	1	0.180075	0.264	0.308	0.194896	1	0.521707	0.203	0.186	0.290119	1	-0.146057	0.249	0.238	0.983359	1
Rmnd5a	-0.163639	0.336	0.127	1.73026e-05	0.514494	-1.68556	0.131	0.16	0.392332	1	-0.339039	0.178	0.269	0.0617619	1	0.179157	0.316	0.272	0.221397	1	-0.196177	0.107	0.11	0.916648	1	-0.0138269	0.187	0.241	0.0659875	1
Hif1a	0.309547	0.918	0.725	1.7344e-05	0.515724	-0.200436	0.639	0.811	0.00530977	1	-0.133528	0.752	0.769	0.540048	1	0.187915	0.892	0.858	0.11087	1	0.0704318	0.651	0.735	0.0708674	1	0.502493	0.806	0.844	0.0185056	1
Slc11a2	0.125853	0.322	0.122	1.73883e-05	0.517041	-0.242533	0.139	0.22	0.0501429	1	0.466439	0.242	0.176	0.171817	1	-0.377228	0.283	0.248	0.308717	1	0.298557	0.133	0.132	0.900121	1	0.310713	0.22	0.156	0.0455177	1
Dpp7	0.523352	0.432	0.206	1.74447e-05	0.51872	0.486681	0.32	0.314	0.870502	1	-0.0754546	0.401	0.398	0.711864	1	-0.0393941	0.431	0.456	0.529063	1	0.153295	0.21	0.265	0.0496528	1	0.323162	0.44	0.361	0.0275238	1
Rnf139	0.753938	0.411	0.18	1.75285e-05	0.521209	-0.77478	0.254	0.233	0.787564	1	-0.122836	0.331	0.37	0.539599	1	0.422636	0.398	0.285	0.00231156	1	0.753379	0.197	0.201	0.895598	1	-0.151111	0.309	0.316	0.755787	1
Dpp3	0.0431411	0.658	0.418	1.75838e-05	0.522855	0.0202977	0.402	0.475	0.175665	1	0.879462	0.548	0.454	0.097877	1	0.714087	0.558	0.467	0.00271164	1	-0.189232	0.338	0.405	0.0183024	1	0.736924	0.524	0.449	0.0217961	1
Pmvk	0.722838	0.397	0.18	1.76031e-05	0.523427	-0.168613	0.221	0.252	0.44628	1	-0.116668	0.293	0.287	0.901246	1	0.24869	0.305	0.367	0.0993134	1	0.117226	0.21	0.206	0.767922	1	-0.181143	0.318	0.282	0.269617	1
Sun2	-0.0336123	0.747	0.487	1.76071e-05	0.523548	0.301155	0.664	0.613	0.211427	1	0.0102938	0.637	0.676	0.495529	1	0.274631	0.758	0.688	0.231245	1	0.443953	0.612	0.564	0.00771869	1	-0.192619	0.658	0.66	0.0999195	1
Lsm6	0.592143	0.418	0.19	1.76449e-05	0.524672	-0.0844555	0.279	0.34	0.213044	1	0.272189	0.389	0.417	0.79435	1	0.0106115	0.442	0.449	0.669087	1	-0.808762	0.244	0.351	5.33594e-05	1	-0.0742039	0.419	0.493	0.0626883	1
Gpr4	0.545803	0.685	0.481	1.78241e-05	0.53	0.0570594	0.549	0.629	0.148614	1	-1.20406	0.592	0.713	0.000126283	1	0.241715	0.714	0.715	0.422931	1	0.0725787	0.604	0.625	0.380162	1	-0.0819238	0.653	0.728	0.0586278	1
Csnk1d	0.183152	0.61	0.365	1.78879e-05	0.531896	0.401142	0.541	0.541	0.402265	1	-0.586711	0.478	0.685	0.000167463	1	0.620835	0.643	0.515	0.000196326	1	-0.0445289	0.36	0.421	0.118667	1	-0.66816	0.51	0.673	7.01999e-06	0.208739
Pik3r6	0.242009	0.616	0.37	1.78958e-05	0.532131	0.0879522	0.385	0.421	0.60011	1	-0.323422	0.49	0.491	0.703325	1	0.23562	0.569	0.586	0.516704	1	-0.00823255	0.334	0.445	0.00195563	1	0.335087	0.572	0.49	0.00666387	1
Tmc7	-0.115544	0.459	0.212	1.80204e-05	0.535836	-0.272569	0.115	0.236	0.00630595	1	-0.105617	0.306	0.296	0.909666	1	-0.457159	0.383	0.389	0.54575	1	0.17244	0.09	0.129	0.0658613	1	-0.0066595	0.275	0.269	0.50488	1
Snx19	0.259093	0.568	0.312	1.80458e-05	0.536593	-0.0366493	0.279	0.368	0.0966086	1	0.523325	0.471	0.435	0.269718	1	0.113239	0.565	0.502	0.208371	1	0.00167226	0.317	0.371	0.199129	1	0.299758	0.538	0.497	0.205668	1
Asb13	-0.229585	0.452	0.217	1.80762e-05	0.537496	-0.087898	0.197	0.343	0.00401522	1	0.906962	0.338	0.269	0.188332	1	0.338128	0.409	0.338	0.0206754	1	0.0340543	0.24	0.28	0.222328	1	0.0471614	0.397	0.316	0.0210079	1
Xrcc5	1.91756	0.158	0.026	1.81405e-05	0.539409	-0.841718	0.041	0.053	0.599189	1	0.674746	0.102	0.102	0.935612	1	0.167957	0.156	0.093	0.0136979	1	-0.00556207	0.036	0.069	0.0154986	1	0.210721	0.139	0.109	0.23962	1
Osbp	0.519705	0.233	0.069	1.82451e-05	0.542517	0.408025	0.098	0.079	0.493531	1	-1.0401	0.108	0.102	0.950028	1	0.681625	0.178	0.17	0.794817	1	0.478225	0.056	0.07	0.35445	1	1.35451	0.146	0.058	0.00019982	1
Ptger1	0.219434	0.466	0.222	1.82815e-05	0.543602	-0.0450468	0.254	0.336	0.162155	1	-0.0726557	0.389	0.398	0.685736	1	0.221294	0.353	0.338	0.728454	1	-0.363243	0.174	0.271	0.000134002	1	0.430977	0.359	0.316	0.207331	1
Cntln	-0.0621578	0.432	0.196	1.84301e-05	0.548018	-0.404422	0.148	0.255	0.0256897	1	0.0345303	0.35	0.444	0.201718	1	-0.0121639	0.331	0.387	0.102352	1	-0.363535	0.126	0.165	0.0682191	1	-0.224583	0.325	0.378	0.16122	1
Cnppd1	0.250502	0.712	0.466	1.85242e-05	0.550817	0.188489	0.492	0.604	0.262201	1	-0.160434	0.643	0.639	0.419397	1	0.048219	0.699	0.659	0.56086	1	0.00725643	0.407	0.502	0.00874273	1	-0.122694	0.61	0.629	0.356126	1
0610010K14Rik	0.337386	0.747	0.487	1.8564e-05	0.551999	-0.463467	0.451	0.676	5.60218e-05	1	-0.286603	0.637	0.787	0.0179365	1	-0.139871	0.68	0.697	0.220067	1	-0.216163	0.469	0.567	0.0056525	1	-0.234199	0.66	0.786	0.0340176	1
Tmem9b	0.117935	0.87	0.619	1.8565e-05	0.552029	-0.169458	0.697	0.736	0.284916	1	-0.0849701	0.739	0.815	0.101275	1	-0.183239	0.784	0.785	0.745788	1	0.461159	0.634	0.629	0.114486	1	-0.125925	0.739	0.769	0.442217	1
Zfpl1	-0.0788048	0.527	0.259	1.85923e-05	0.552842	0.0940682	0.361	0.412	0.610618	1	0.0475582	0.401	0.389	0.782451	1	-0.0960937	0.532	0.513	0.977639	1	0.129448	0.33	0.371	0.481009	1	-0.126537	0.478	0.449	0.488792	1
Ecd	0.0162675	0.479	0.233	1.8685e-05	0.555597	0.0525726	0.279	0.318	0.279977	1	0.18258	0.369	0.389	0.760884	1	-0.0965079	0.435	0.418	0.665636	1	0.217118	0.233	0.261	0.406385	1	0.0688873	0.373	0.401	0.508338	1
Gja4	0.349596	0.966	0.862	1.87956e-05	0.558887	0.157903	0.918	0.956	0.730985	1	-0.127496	0.892	0.87	0.4233	1	0.190203	0.918	0.881	0.0195113	1	0.213477	0.792	0.869	0.0119349	1	0.428654	0.859	0.878	0.038189	1
Hhex	0.212834	0.712	0.46	1.88004e-05	0.559031	0.154124	0.459	0.591	0.124029	1	0.0790954	0.624	0.62	0.921193	1	0.118961	0.699	0.617	0.440987	1	-0.157122	0.418	0.546	8.34288e-05	1	0.326682	0.567	0.527	0.152445	1
Fam53c	0.375116	0.37	0.148	1.88106e-05	0.559335	1.05896	0.254	0.223	0.339656	1	0.141997	0.242	0.278	0.591564	1	0.786612	0.39	0.246	8.27718e-05	1	0.373444	0.103	0.12	0.449379	1	-0.603635	0.177	0.224	0.125798	1
Maml2	-0.229424	0.438	0.201	1.88112e-05	0.559352	-0.133735	0.311	0.314	0.965487	1	0.0441947	0.452	0.611	0.0299637	1	0.0305978	0.461	0.374	0.0302093	1	-0.558991	0.135	0.249	2.79345e-06	0.0830631	0.135443	0.507	0.497	0.370042	1
Ccm2	0.0292141	0.541	0.28	1.88796e-05	0.561385	0.394999	0.295	0.299	0.815304	1	0.449265	0.325	0.278	0.353968	1	0.0648505	0.472	0.489	0.713873	1	-0.102918	0.21	0.275	0.0140965	1	-0.150943	0.364	0.354	0.995014	1
Kctd18	0.580708	0.267	0.085	1.89538e-05	0.563591	0.377605	0.098	0.182	0.0412693	1	-0.902946	0.191	0.204	0.640513	1	0.739422	0.26	0.177	0.00612496	1	0.108143	0.084	0.12	0.0640249	1	0.772808	0.196	0.133	0.0346651	1
Bcl7b	0.189276	0.74	0.476	1.89554e-05	0.56364	0.0184706	0.541	0.519	0.957236	1	0.261014	0.618	0.611	0.912392	1	0.134158	0.658	0.644	0.74099	1	0.169175	0.516	0.522	0.720553	1	0.17596	0.651	0.599	0.30801	1
Sars	0.120609	0.705	0.46	1.89749e-05	0.564219	-0.103036	0.656	0.686	0.305225	1	-0.0818366	0.662	0.704	0.418729	1	-0.459341	0.647	0.701	0.00418114	1	-0.0140787	0.55	0.6	0.274277	1	0.214243	0.632	0.66	0.740469	1
Prkd1	-0.270278	0.301	0.106	1.90196e-05	0.565549	0.123566	0.189	0.107	0.0241879	1	-1.15024	0.146	0.213	0.133895	1	0.680884	0.349	0.248	0.00763516	1	0.0147728	0.167	0.131	0.0818548	1	-0.574294	0.249	0.347	0.00665128	1
Cog3	0.517861	0.322	0.116	1.90378e-05	0.56609	7.17412e-05	0.238	0.217	0.590461	1	0.357816	0.229	0.222	0.942334	1	0.466197	0.361	0.347	0.514801	1	-0.0337058	0.167	0.206	0.10374	1	-0.398776	0.251	0.276	0.470941	1
Sil1	-0.00678328	0.452	0.212	1.90539e-05	0.566567	0.232029	0.336	0.318	0.800126	1	0.0478584	0.293	0.444	0.0093033	1	-0.0638466	0.405	0.471	0.023876	1	0.729226	0.313	0.268	0.0452538	1	-0.147888	0.431	0.429	0.779911	1
Mdc1	0.883057	0.315	0.122	1.91067e-05	0.568139	-1.42902	0.123	0.258	0.00280572	1	-0.199766	0.197	0.306	0.0665363	1	-0.0331251	0.279	0.319	0.201722	1	-0.345169	0.126	0.201	0.00116652	1	-0.145203	0.251	0.327	0.0212326	1
Pfkl	-0.182205	0.699	0.487	1.91546e-05	0.569563	0.166692	0.549	0.594	0.681372	1	0.743336	0.637	0.574	0.077092	1	0.146943	0.688	0.69	0.762076	1	0.0358701	0.627	0.603	0.398382	1	0.168252	0.665	0.575	0.00928821	1
Map4k5	0.798885	0.541	0.317	1.9379e-05	0.576234	-0.316333	0.262	0.371	0.0503005	1	1.03862	0.427	0.398	0.256251	1	0.261431	0.517	0.511	0.863145	1	-0.275192	0.21	0.297	0.00203351	1	-0.118748	0.447	0.449	0.896852	1
Med24	0.331636	0.356	0.148	1.94935e-05	0.579638	-0.59466	0.238	0.296	0.14425	1	-0.434975	0.236	0.296	0.2541	1	0.351909	0.364	0.35	0.838181	1	-0.255107	0.221	0.296	0.00760618	1	0.0948415	0.263	0.282	0.632492	1
5430416O09Rik	0.434493	0.411	0.19	1.95233e-05	0.580526	1.12378	0.262	0.289	0.817606	1	-0.761943	0.306	0.398	0.127078	1	0.119158	0.472	0.482	0.767887	1	-0.213113	0.323	0.418	0.0022744	1	-0.00270646	0.478	0.422	0.16852	1
Rsrp1	-0.391555	0.993	0.989	1.95281e-05	0.580667	-0.593613	0.861	0.994	1.62498e-08	0.000483187	0.326976	1	0.981	0.00162977	1	-0.157188	0.989	0.991	0.415252	1	-0.290375	0.893	0.986	8.06647e-11	2.39857e-06	0.3129	0.981	0.969	0.00089507	1
Csnk1g1	0.737768	0.39	0.18	1.9557e-05	0.581528	0.465858	0.156	0.214	0.234829	1	0.163844	0.236	0.333	0.0951044	1	0.021526	0.361	0.341	0.66986	1	-0.236198	0.144	0.174	0.236909	1	-0.657782	0.227	0.364	4.96692e-05	1
Tmem167b	-0.256782	0.61	0.333	1.95798e-05	0.582207	0.432987	0.385	0.421	0.900277	1	-0.188336	0.427	0.519	0.136119	1	0.237689	0.576	0.542	0.123631	1	-0.321563	0.302	0.387	0.00202896	1	-0.0316728	0.519	0.5	0.873913	1
Rb1cc1	-0.0920179	0.658	0.386	1.96621e-05	0.584652	-0.06507	0.336	0.358	0.625381	1	-0.127714	0.439	0.537	0.151176	1	-0.106439	0.658	0.558	0.00554978	1	-0.453475	0.242	0.328	0.0019677	1	-0.400489	0.423	0.52	0.000877721	1
Mbd4	0.587488	0.349	0.148	1.96803e-05	0.585193	-0.995832	0.131	0.167	0.329755	1	0.109054	0.197	0.213	0.760517	1	-0.193498	0.331	0.285	0.28945	1	-0.0707564	0.129	0.167	0.0941394	1	0.130305	0.285	0.248	0.227847	1
Mvb12a	0.272576	0.651	0.381	1.97242e-05	0.5865	-0.0179203	0.418	0.569	0.0265917	1	-0.335573	0.535	0.537	0.493242	1	0.145205	0.643	0.615	0.458087	1	-0.0227809	0.411	0.495	0.0270612	1	-0.113071	0.478	0.466	0.827381	1
AI837181	0.151197	0.247	0.074	1.97285e-05	0.586627	0.44908	0.18	0.17	0.679898	1	0.260366	0.204	0.231	0.681202	1	-0.135153	0.212	0.208	0.964551	1	0.253964	0.114	0.115	0.990473	1	-0.35048	0.12	0.184	0.0235511	1
Osgep	0.0894619	0.685	0.402	1.9812e-05	0.58911	-0.518992	0.344	0.528	0.000541088	1	0.210561	0.51	0.509	0.814615	1	-0.00548847	0.669	0.668	0.203999	1	0.126212	0.355	0.438	0.0328741	1	-0.220109	0.545	0.578	0.517672	1
Ercc6l2	1.21096	0.301	0.111	1.98742e-05	0.59096	-0.550726	0.074	0.082	0.74192	1	-0.740898	0.134	0.176	0.289445	1	-1.14448	0.19	0.208	0.502246	1	-0.895155	0.068	0.105	0.0305104	1	0.241519	0.158	0.136	0.441622	1
Arrb1	0.466628	0.548	0.312	1.98827e-05	0.591213	0.552588	0.32	0.283	0.307762	1	-0.139699	0.357	0.426	0.197865	1	-0.694123	0.387	0.449	0.0184222	1	-0.258474	0.143	0.192	0.03033	1	0.283347	0.33	0.286	0.0984878	1
Sf3a1	-0.215037	0.603	0.344	2.00703e-05	0.596789	0.170687	0.451	0.44	0.901444	1	-0.500557	0.452	0.565	0.0320385	1	0.146775	0.569	0.593	0.24681	1	-0.156779	0.398	0.476	0.14012	1	0.280724	0.538	0.476	0.0636538	1
Flywch1	0.603315	0.623	0.365	2.00938e-05	0.59749	-0.313653	0.385	0.525	0.0163343	1	-0.589439	0.497	0.583	0.0388243	1	0.0753323	0.558	0.588	0.720465	1	0.128856	0.403	0.457	0.0671987	1	-0.186781	0.589	0.602	0.393248	1
Rilpl1	0.312953	0.555	0.296	2.01678e-05	0.599688	0.362229	0.377	0.333	0.258086	1	-0.517821	0.427	0.407	0.816559	1	0.251582	0.569	0.511	0.137899	1	-0.238577	0.326	0.338	0.562187	1	-0.0393399	0.423	0.463	0.181763	1
Gng2	0.444769	0.473	0.243	2.02238e-05	0.601354	0.831222	0.246	0.28	0.661808	1	-1.00958	0.338	0.556	0.000113402	1	0.257378	0.457	0.376	0.0315817	1	-0.00133572	0.255	0.27	0.601762	1	-0.14006	0.533	0.565	0.538008	1
Dnal4	-0.70014	0.363	0.153	2.0263e-05	0.602519	-0.212273	0.197	0.264	0.123639	1	0.197505	0.287	0.287	0.976363	1	0.0925388	0.342	0.385	0.118293	1	0.0746892	0.193	0.241	0.0899338	1	0.0769814	0.275	0.31	0.263341	1
Stx12	0.16517	0.849	0.619	2.02779e-05	0.602965	-0.160632	0.648	0.723	0.0696429	1	0.229909	0.879	0.824	0.740185	1	0.317661	0.866	0.81	0.00457621	1	-0.0752301	0.548	0.686	9.96258e-05	1	0.252639	0.83	0.779	0.297559	1
Usp11	0.0903172	0.212	0.053	2.0374e-05	0.605819	0.558871	0.049	0.053	0.840816	1	0.0293609	0.057	0.037	0.457428	1	1.16723	0.152	0.091	0.0106773	1	-0.33469	0.015	0.046	0.00288195	1	0.711558	0.062	0.041	0.213099	1
Surf4	0.0991573	0.87	0.646	2.05175e-05	0.610087	0.181597	0.787	0.868	0.398865	1	0.0812428	0.885	0.852	0.795784	1	0.218046	0.859	0.825	0.376969	1	0.248932	0.775	0.789	0.239086	1	0.0569441	0.797	0.816	0.679428	1
Ampd3	0.124411	0.534	0.27	2.05522e-05	0.611119	-0.36472	0.295	0.33	0.373908	1	0.68565	0.344	0.324	0.546318	1	0.129393	0.494	0.44	0.255198	1	-0.0653892	0.259	0.326	0.0173096	1	0.0975344	0.368	0.364	0.843236	1
Dchs1	0.768925	0.493	0.259	2.05865e-05	0.61214	0.132476	0.385	0.434	0.561286	1	-1.01186	0.401	0.63	0.000218828	1	-0.0719991	0.416	0.485	0.0474925	1	0.0960143	0.347	0.366	0.451289	1	-0.23395	0.435	0.49	0.119862	1
Anapc11	0.304922	0.795	0.54	2.05915e-05	0.612289	-0.133593	0.598	0.742	0.0697737	1	-0.492852	0.688	0.852	0.00375608	1	-0.289203	0.84	0.77	0.874466	1	-0.165962	0.507	0.672	2.14444e-07	0.0063765	-0.451791	0.687	0.84	5.26439e-07	0.0156537
Gm11696	0.511145	0.253	0.079	2.0647e-05	0.613937	-0.463079	0.139	0.157	0.598075	1	-0.36837	0.166	0.241	0.101306	1	0.166701	0.175	0.128	0.113169	1	0.467114	0.107	0.12	0.52385	1	-0.412653	0.136	0.122	0.70244	1
Zc3hav1	0.0453477	0.712	0.429	2.06616e-05	0.614373	-0.418035	0.393	0.506	0.0416435	1	-0.336098	0.573	0.722	0.00550707	1	0.0557565	0.665	0.695	0.69863	1	0.469036	0.341	0.39	0.284167	1	-0.11853	0.682	0.721	0.0457423	1
Errfi1	0.0805689	0.582	0.349	2.08165e-05	0.61898	-0.345927	0.246	0.292	0.206491	1	0.493473	0.446	0.463	0.985057	1	0.118188	0.494	0.358	3.57257e-05	1	0.863502	0.171	0.203	0.250796	1	0.0263817	0.371	0.412	0.546834	1
Tbcb	0.0830695	0.74	0.444	2.08198e-05	0.619078	-0.211865	0.467	0.553	0.0938555	1	0.294588	0.65	0.602	0.174054	1	0.140195	0.691	0.681	0.4481	1	-0.252673	0.415	0.448	0.823079	1	-0.0914226	0.605	0.619	0.966985	1
Gm26773	0.820469	0.199	0.048	2.08675e-05	0.620496	0.295675	0.098	0.079	0.503468	1	0.36459	0.153	0.074	0.0558342	1	0.344935	0.138	0.124	0.589255	1	0.15326	0.084	0.082	0.915122	1	-0.365789	0.117	0.119	0.827428	1
AI314180	0.472231	0.37	0.169	2.08753e-05	0.620728	-0.190006	0.197	0.27	0.147348	1	-0.564732	0.331	0.269	0.543222	1	-0.200496	0.372	0.314	0.158364	1	-0.364819	0.165	0.244	0.00127073	1	0.0591965	0.285	0.279	0.99126	1
C87436	0.576992	0.493	0.249	2.09447e-05	0.622792	-0.159748	0.27	0.343	0.192837	1	0.608048	0.459	0.528	0.290219	1	0.00998971	0.461	0.5	0.426363	1	0.0756844	0.281	0.325	0.197632	1	0.185466	0.524	0.432	0.00312219	1
Ap4b1	0.682031	0.445	0.233	2.09625e-05	0.623319	-0.226198	0.172	0.195	0.645867	1	0.15954	0.172	0.185	0.82263	1	0.916222	0.401	0.261	4.20266e-05	1	0.166268	0.169	0.179	0.776457	1	0.697142	0.321	0.19	0.000107521	1
Gm26514	0.054429	0.329	0.132	2.11649e-05	0.629338	-0.668772	0.139	0.192	0.178244	1	0.535051	0.274	0.361	0.211371	1	0.395498	0.331	0.226	0.00343305	1	0.0957628	0.152	0.182	0.173202	1	0.0515228	0.215	0.299	0.0108891	1
Usp6nl	-0.215158	0.377	0.153	2.13827e-05	0.635814	0.194663	0.148	0.179	0.503336	1	-0.851279	0.261	0.361	0.0262837	1	0.175144	0.338	0.274	0.0916452	1	0.317935	0.126	0.167	0.0546948	1	-0.537807	0.187	0.289	0.000861354	1
Dalrd3	0.673295	0.527	0.27	2.14961e-05	0.639187	0.185358	0.352	0.456	0.119124	1	0.439208	0.516	0.463	0.273453	1	-0.282712	0.509	0.535	0.555382	1	-0.271688	0.332	0.387	0.0712109	1	-0.0233489	0.457	0.442	0.970429	1
Prkra	-0.259191	0.438	0.201	2.15854e-05	0.641841	-0.343753	0.246	0.248	0.880093	1	0.854629	0.299	0.25	0.290551	1	0.358471	0.401	0.383	0.33231	1	0.529266	0.253	0.229	0.189326	1	-0.455454	0.289	0.33	0.228432	1
Trim11	0.653675	0.432	0.212	2.1635e-05	0.643318	0.0502911	0.213	0.311	0.04007	1	0.0952945	0.408	0.38	0.433551	1	0.00966689	0.394	0.314	0.070618	1	-0.243226	0.15	0.253	3.90331e-05	1	0.461639	0.404	0.299	0.00556259	1
Uba7	0.128714	0.808	0.646	2.16411e-05	0.643497	-0.191529	0.754	0.77	0.157863	1	0.0455656	0.713	0.713	0.917174	1	-0.0208889	0.84	0.843	0.636955	1	0.195877	0.765	0.823	0.310316	1	0.200364	0.825	0.823	0.468971	1
Ghdc	-0.0434443	0.39	0.169	2.1711e-05	0.645576	-0.483648	0.205	0.255	0.273369	1	0.141714	0.268	0.333	0.367984	1	-0.254645	0.323	0.44	0.000445353	1	0.102813	0.174	0.246	0.0114195	1	-0.587695	0.254	0.299	0.104751	1
Tnfaip2	0.265561	0.884	0.667	2.17304e-05	0.646153	-0.127925	0.689	0.761	0.374793	1	0.446662	0.777	0.824	0.740727	1	0.135907	0.888	0.874	0.0433161	1	-0.17916	0.739	0.782	0.0363361	1	-0.445086	0.794	0.915	2.00183e-07	0.00595246
March2	0.568157	0.548	0.312	2.19006e-05	0.651215	0.116983	0.418	0.509	0.262955	1	-0.240236	0.471	0.602	0.0428417	1	0.203328	0.506	0.513	0.476888	1	-0.226196	0.28	0.418	9.83656e-06	0.29249	-0.443099	0.44	0.558	0.00236478	1
Dus3l	0.391711	0.479	0.254	2.19418e-05	0.65244	-0.0820809	0.393	0.409	0.634959	1	-0.141286	0.395	0.361	0.664847	1	0.231867	0.476	0.462	0.71889	1	0.217178	0.306	0.34	0.446478	1	0.208576	0.4	0.316	0.0343252	1
Tnip1	0.490236	0.541	0.312	2.19712e-05	0.653315	-0.564044	0.311	0.456	0.0069416	1	-0.189803	0.497	0.435	0.862555	1	0.268365	0.565	0.502	0.133765	1	-0.187299	0.313	0.418	0.000356897	1	0.464501	0.426	0.398	0.197277	1
Zfp113	0.242349	0.363	0.159	2.19761e-05	0.65346	-1.55522	0.131	0.195	0.102066	1	-1.27452	0.255	0.361	0.0328765	1	0.53301	0.335	0.296	0.448647	1	-0.200341	0.113	0.18	0.00124113	1	-0.429159	0.22	0.31	0.0129509	1
Elac2	1.04365	0.281	0.101	2.19777e-05	0.653506	-2.05851	0.074	0.164	0.00980984	1	0.544972	0.146	0.204	0.314304	1	0.122354	0.249	0.263	0.43992	1	-0.360811	0.098	0.124	0.151418	1	0.00868169	0.199	0.16	0.186817	1
Rbck1	0.241641	0.849	0.73	2.20251e-05	0.654917	-0.0681658	0.738	0.836	0.00769022	1	0.0430618	0.873	0.806	0.472627	1	0.0480653	0.877	0.836	0.695884	1	0.0673921	0.78	0.816	0.146981	1	0.192586	0.813	0.799	0.262738	1
Sept11	0.262838	0.562	0.333	2.21478e-05	0.658564	-0.493298	0.352	0.425	0.153957	1	0.124804	0.503	0.574	0.417905	1	-0.246821	0.651	0.646	0.872491	1	-0.0974291	0.31	0.397	0.00826488	1	-0.00888258	0.593	0.684	0.0243824	1
Echs1	0.168874	0.562	0.307	2.21947e-05	0.659958	-0.52806	0.328	0.418	0.0937432	1	0.115359	0.51	0.472	0.366136	1	0.377854	0.569	0.507	0.0825767	1	-0.148558	0.319	0.368	0.114333	1	0.386404	0.474	0.432	0.101993	1
Nid2	0.370141	0.747	0.524	2.24092e-05	0.666338	-0.0738297	0.598	0.616	0.899368	1	0.524043	0.739	0.63	0.0537537	1	0.433078	0.743	0.648	0.00100017	1	-0.135013	0.523	0.579	0.0998189	1	-0.232117	0.62	0.639	0.158884	1
Pi4kb	0.218217	0.473	0.222	2.24209e-05	0.666684	-0.00824899	0.172	0.255	0.0876226	1	-0.141688	0.369	0.426	0.202288	1	0.0846169	0.375	0.363	0.940837	1	-0.195036	0.178	0.23	0.0437695	1	-0.250044	0.282	0.367	0.0285406	1
Mapk8ip3	0.251452	0.753	0.487	2.25811e-05	0.671448	-0.0969894	0.598	0.682	0.0961365	1	-0.317897	0.713	0.778	0.015103	1	0.0473741	0.781	0.723	0.0780037	1	-0.143019	0.546	0.622	0.0648768	1	-0.17518	0.696	0.752	0.0309669	1
Cd74	-2.43791	0.644	0.698	2.26642e-05	0.673921	0.192126	0.91	0.912	0.0678597	1	-0.0128138	0.924	0.954	0.279077	1	-1.06513	0.743	0.889	5.32927e-22	1.58466e-17	-0.082171	0.962	0.954	0.601947	1	0.171682	0.986	0.983	0.00220569	1
Ep400	0.302911	0.658	0.392	2.26809e-05	0.674415	-0.25234	0.443	0.519	0.185167	1	0.74601	0.567	0.509	0.283452	1	0.00923946	0.584	0.593	0.896485	1	-0.154193	0.37	0.454	0.0257144	1	0.144388	0.584	0.503	0.100373	1
Toe1	0.333234	0.336	0.132	2.27098e-05	0.675277	-0.853924	0.148	0.132	0.743048	1	0.164197	0.146	0.13	0.70572	1	0.166753	0.23	0.232	0.902069	1	0.230239	0.148	0.151	0.953723	1	-0.352864	0.163	0.136	0.417787	1
Prepl	-0.0135911	0.226	0.063	2.27199e-05	0.675576	-0.11198	0.107	0.091	0.644356	1	-1.97815	0.108	0.167	0.13915	1	1.01542	0.208	0.15	0.0478702	1	-0.528408	0.069	0.082	0.418242	1	-0.926705	0.067	0.095	0.150725	1
Hsd3b7	0.0978612	0.849	0.63	2.27728e-05	0.67715	0.217976	0.68	0.767	0.396176	1	-0.0663726	0.764	0.806	0.65204	1	0.46367	0.829	0.796	0.00107956	1	0.236257	0.719	0.742	0.699562	1	0.207658	0.825	0.769	0.167245	1
Cct3	0.166256	0.87	0.688	2.28526e-05	0.679523	0.124507	0.672	0.748	0.340088	1	0.181421	0.745	0.639	0.0701332	1	0.100369	0.825	0.792	0.539211	1	0.079465	0.627	0.667	0.417372	1	0.403498	0.734	0.639	0.000729521	1
Ikzf5	0.390872	0.473	0.238	2.29326e-05	0.6819	0.261824	0.18	0.208	0.509273	1	-0.17513	0.236	0.361	0.0251891	1	0.618545	0.442	0.303	0.000238356	1	0.0979377	0.129	0.191	0.00710595	1	-0.0656749	0.306	0.357	0.170255	1
Dennd6b	-0.751602	0.226	0.063	2.31113e-05	0.687215	-0.7997	0.066	0.142	0.0276536	1	0.386393	0.096	0.056	0.252642	1	-0.156766	0.212	0.272	0.0783381	1	-0.180048	0.068	0.084	0.280154	1	-0.0833942	0.127	0.136	0.641157	1
Ndufa4	0.398135	0.877	0.693	2.32365e-05	0.690936	-0.19724	0.803	0.881	0.128915	1	-0.985737	0.847	1	2.85232e-13	8.48137e-09	-0.0634587	0.933	0.825	0.237293	1	-0.293084	0.767	0.818	0.000574108	1	-0.491691	0.806	0.976	7.44738e-13	2.21448e-08
Hspa1a	-0.479045	0.986	1	2.33276e-05	0.693645	-0.569327	0.795	0.984	2.39689e-12	7.12716e-08	0.595868	0.975	0.889	3.76519e-06	0.111958	-0.530816	0.963	0.989	8.64771e-09	0.00025714	-0.59614	0.715	0.959	3.56221e-37	1.05922e-32	0.774709	0.938	0.905	7.51258e-07	0.0223387
Nampt	0.152017	0.651	0.381	2.33418e-05	0.694069	-0.204424	0.27	0.362	0.0714094	1	0.417353	0.459	0.389	0.253872	1	0.109194	0.599	0.611	0.676222	1	-0.420587	0.25	0.368	3.03009e-05	0.900998	0.359199	0.498	0.432	0.0876744	1
Aftph	0.228802	0.397	0.18	2.34055e-05	0.695964	-0.0204053	0.139	0.167	0.480783	1	0.621811	0.389	0.37	0.459049	1	0.289996	0.413	0.389	0.637333	1	-0.18391	0.101	0.151	0.0145731	1	-0.258057	0.311	0.282	0.494331	1
Ubxn6	-0.0603688	0.712	0.444	2.36312e-05	0.702675	0.100409	0.623	0.56	0.64028	1	0.250925	0.631	0.5	0.170203	1	0.306441	0.732	0.644	0.127636	1	0.279328	0.552	0.56	0.291736	1	0.0128123	0.622	0.575	0.493451	1
Cc2d2a	0.238852	0.158	0.026	2.36437e-05	0.703045	-1.59344	0.025	0.097	0.0103737	1	-1.80165	0.025	0.139	0.000420973	1	0.921935	0.145	0.097	0.0428551	1	-0.544872	0.036	0.084	0.000782908	1	-0.597864	0.084	0.112	0.171992	1
Spryd7	0.304111	0.582	0.317	2.37531e-05	0.706299	0.00322026	0.475	0.481	0.878272	1	-0.172704	0.516	0.667	0.0333244	1	0.184386	0.587	0.551	0.531245	1	0.359292	0.36	0.373	0.743528	1	-0.306371	0.51	0.588	0.00943939	1
Ryk	0.687691	0.247	0.074	2.38167e-05	0.70819	0.249317	0.131	0.113	0.61204	1	-0.463715	0.185	0.278	0.0634784	1	-0.525543	0.212	0.223	0.63967	1	-0.0129126	0.058	0.072	0.353996	1	-0.447345	0.211	0.238	0.379108	1
Phc3	0.043518	0.712	0.487	2.40393e-05	0.714809	-0.128324	0.484	0.645	0.0150325	1	-0.111803	0.65	0.63	0.481479	1	0.305676	0.699	0.695	0.246463	1	-0.0501321	0.495	0.579	0.0335737	1	0.0112406	0.629	0.694	0.401888	1
Vps33a	-0.0759207	0.479	0.228	2.4113e-05	0.717	0.0505253	0.27	0.311	0.61266	1	-0.537543	0.287	0.398	0.0562891	1	0.629711	0.465	0.369	0.00836704	1	0.0766994	0.28	0.318	0.177453	1	0.402062	0.368	0.306	0.089345	1
Mtif3	0.0332388	0.562	0.291	2.42661e-05	0.721554	0.0510752	0.385	0.425	0.483836	1	-0.0754798	0.49	0.463	0.944571	1	0.29649	0.517	0.507	0.896827	1	0.426531	0.311	0.354	0.308108	1	0.0400044	0.459	0.463	0.451412	1
Hey1	0.603998	0.541	0.312	2.43316e-05	0.723501	0.123228	0.475	0.494	0.911517	1	-0.127008	0.529	0.602	0.133901	1	-0.379997	0.428	0.425	0.757947	1	-0.0990546	0.154	0.271	5.39647e-06	0.160464	0.18883	0.4	0.364	0.129108	1
Ipo13	-0.105987	0.39	0.18	2.43751e-05	0.724794	0.77676	0.328	0.283	0.200174	1	-0.0491665	0.28	0.343	0.333086	1	0.214645	0.428	0.418	0.983413	1	0.245797	0.223	0.261	0.204323	1	0.217203	0.364	0.313	0.189141	1
Itga9	0.50949	0.507	0.27	2.43945e-05	0.725372	0.0120617	0.295	0.252	0.400841	1	-0.128065	0.268	0.398	0.029324	1	0.352926	0.502	0.385	0.00103303	1	0.456223	0.236	0.18	0.0127136	1	-0.0900551	0.301	0.31	0.727414	1
Nucb1	0.348356	0.973	0.852	2.44602e-05	0.727325	-0.015538	0.959	0.953	0.340113	1	0.0759419	0.955	0.926	0.565275	1	0.108735	0.959	0.867	0.0389613	1	0.184543	0.902	0.923	0.0689793	1	-0.225311	0.902	0.929	0.00922604	1
Usp9x	0.273812	0.699	0.444	2.4549e-05	0.729964	-0.522961	0.385	0.503	0.0159098	1	-0.80634	0.484	0.602	0.0192943	1	0.241348	0.654	0.584	0.00444225	1	0.188496	0.394	0.397	0.94837	1	-0.0383903	0.572	0.622	0.0746103	1
Tut1	0.728206	0.295	0.106	2.45607e-05	0.730312	-0.244442	0.23	0.23	0.878469	1	-0.0172337	0.306	0.352	0.369617	1	-0.190938	0.283	0.263	0.735012	1	-0.190787	0.137	0.191	0.0150096	1	0.662167	0.297	0.221	0.0298768	1
Cox5a	0.360629	0.774	0.519	2.45674e-05	0.730512	-0.312109	0.615	0.767	0.00551087	1	-0.495748	0.713	0.88	0.000606467	1	-0.217796	0.825	0.79	0.895177	1	-0.232134	0.612	0.708	0.0134418	1	-0.689122	0.756	0.891	3.90792e-09	0.000116202
Usp19	0.354875	0.63	0.365	2.47211e-05	0.735083	0.667256	0.459	0.425	0.170603	1	0.450643	0.573	0.611	0.551118	1	0.502486	0.602	0.591	0.257685	1	0.242158	0.351	0.351	0.88578	1	0.236955	0.562	0.537	0.197305	1
Mycn	0.432673	0.568	0.323	2.4777e-05	0.736745	-0.302231	0.254	0.44	0.000442921	1	0.618363	0.471	0.352	0.0596757	1	-0.00789281	0.494	0.478	0.513992	1	-0.264239	0.193	0.313	1.03516e-05	0.307804	0.51744	0.347	0.245	0.00225471	1
Prkrir	0.745869	0.329	0.132	2.50411e-05	0.744597	-0.512417	0.197	0.236	0.373128	1	-0.119982	0.236	0.287	0.336262	1	-0.0405726	0.309	0.367	0.0851507	1	-0.51782	0.109	0.17	0.00338747	1	-0.221729	0.225	0.245	0.503179	1
Tmem175	0.25656	0.493	0.265	2.51244e-05	0.747073	0.371851	0.23	0.286	0.297716	1	0.324566	0.389	0.38	0.662352	1	-0.009882	0.487	0.436	0.25821	1	-0.0121133	0.24	0.249	0.748391	1	0.301056	0.426	0.378	0.172586	1
Gm27206	0.320048	0.521	0.27	2.53814e-05	0.754717	0.326693	0.451	0.487	0.922175	1	0.632466	0.427	0.38	0.162816	1	0.248427	0.454	0.367	0.00984299	1	0.085001	0.385	0.423	0.228511	1	0.0499246	0.335	0.398	0.0923822	1
Fam134c	0.232727	0.274	0.09	2.55284e-05	0.759087	-0.128158	0.148	0.286	0.00251113	1	0.814522	0.146	0.222	0.101988	1	-0.0194974	0.271	0.184	0.0131355	1	-0.675267	0.126	0.232	4.57356e-06	0.135995	0.10079	0.222	0.167	0.066352	1
Vmp1	0.679825	0.644	0.45	2.55724e-05	0.760394	0.101284	0.41	0.487	0.344368	1	0.0818229	0.503	0.583	0.233791	1	-0.284962	0.613	0.631	0.128229	1	-0.270756	0.336	0.45	0.000148342	1	0.249826	0.553	0.517	0.146773	1
Serinc4	0.0236856	0.664	0.376	2.55753e-05	0.760483	0.0147111	0.459	0.541	0.208751	1	0.956655	0.503	0.481	0.550537	1	0.15837	0.621	0.549	0.171111	1	-0.314824	0.368	0.49	0.000130588	1	0.391204	0.541	0.469	0.0584025	1
Usp39	0.248163	0.493	0.243	2.55944e-05	0.76105	0.076884	0.27	0.365	0.114787	1	0.252687	0.357	0.398	0.578245	1	0.145091	0.472	0.46	0.921735	1	0.128731	0.285	0.299	0.76617	1	-0.247133	0.356	0.378	0.528849	1
Lima1	0.190929	0.801	0.593	2.59963e-05	0.773001	0.199785	0.582	0.635	0.625576	1	-0.269153	0.745	0.796	0.0582691	1	0.173007	0.758	0.754	0.182787	1	0.0278443	0.525	0.603	0.0820786	1	0.033991	0.742	0.789	0.547449	1
Tmem161a	0.226635	0.514	0.27	2.60704e-05	0.775203	0.360741	0.41	0.465	0.721575	1	-0.340946	0.414	0.454	0.354454	1	-0.133789	0.513	0.522	0.310529	1	0.319162	0.379	0.393	0.883375	1	-0.122581	0.4	0.422	0.665199	1
Cyfip1	0.0942216	0.938	0.783	2.62435e-05	0.780351	0.115787	0.754	0.77	0.725534	1	0.238248	0.847	0.898	0.983714	1	0.0790458	0.866	0.81	0.0121226	1	-0.0569919	0.625	0.723	0.00354051	1	0.105649	0.856	0.861	0.746432	1
RP23-436D14.5	0.325082	0.308	0.122	2.64098e-05	0.785294	0.065339	0.148	0.17	0.716324	1	-0.111957	0.115	0.185	0.0989544	1	0.327018	0.283	0.097	3.80143e-11	1.13035e-06	-0.164342	0.113	0.198	0.000116406	1	-0.165218	0.089	0.167	0.00159554	1
Otub1	0.406925	0.753	0.534	2.64793e-05	0.787363	0.000952456	0.557	0.66	0.175841	1	-0.182661	0.713	0.769	0.186706	1	-0.54676	0.725	0.759	0.0344947	1	0.0618937	0.499	0.558	0.395112	1	-0.159328	0.715	0.721	0.718087	1
Fos	-0.306723	0.993	1	2.65949e-05	0.790799	-0.135247	0.959	1	0.000512158	1	0.483145	1	0.991	4.31273e-05	1	-0.174331	1	1	0.000699419	1	-0.0944191	0.949	0.998	8.58767e-26	2.55354e-21	1.28259	0.998	1	3.10967e-12	9.2466e-08
Dctn4	0.537954	0.726	0.492	2.66416e-05	0.792188	-0.104167	0.516	0.538	0.724941	1	-0.310694	0.624	0.778	0.00335356	1	0.359117	0.732	0.67	0.08456	1	0.180019	0.448	0.466	0.626579	1	-0.192621	0.699	0.752	0.0903908	1
Jam2	-0.481419	0.719	0.566	2.66582e-05	0.792682	-0.801255	0.393	0.594	0.000118986	1	1.5051	0.739	0.528	0.000651125	1	-0.0894532	0.822	0.821	0.968796	1	-0.160649	0.484	0.651	1.28981e-07	0.00383525	0.471126	0.773	0.626	5.77885e-06	0.171834
Kdelc1	0.599825	0.438	0.222	2.6709e-05	0.794192	-1.11663	0.23	0.299	0.0712085	1	0.484113	0.357	0.352	0.576908	1	0.377565	0.48	0.46	0.290623	1	0.163691	0.176	0.244	0.0133585	1	0.085528	0.359	0.357	0.871286	1
Aco1	0.515477	0.404	0.185	2.67533e-05	0.795508	0.23956	0.27	0.283	0.80807	1	0.766734	0.306	0.278	0.50326	1	0.16416	0.346	0.396	0.0878602	1	0.236021	0.221	0.222	0.746093	1	-0.0297985	0.39	0.293	0.00668296	1
Arfip1	0.280179	0.548	0.286	2.68963e-05	0.799761	0.373424	0.295	0.377	0.297114	1	-0.241047	0.401	0.463	0.293982	1	0.521959	0.554	0.465	0.00218573	1	-0.356929	0.221	0.277	0.0245241	1	-0.0572191	0.474	0.51	0.36964	1
Rsu1	0.0928416	0.904	0.693	2.69501e-05	0.801362	0.125092	0.73	0.755	0.521916	1	-0.0399079	0.713	0.806	0.11953	1	0.0985026	0.855	0.825	0.165016	1	-0.170437	0.612	0.704	0.00504872	1	-0.267355	0.782	0.823	0.0200242	1
Ptprg	0.537894	0.726	0.519	2.6998e-05	0.802786	-0.560096	0.541	0.654	0.00738969	1	-0.10335	0.72	0.852	0.00677034	1	0.470037	0.74	0.673	4.08187e-05	1	0.18681	0.583	0.586	0.255845	1	-0.335477	0.663	0.823	3.7687e-07	0.0112062
Icmt	0.327638	0.39	0.175	2.70575e-05	0.804554	0.122978	0.213	0.255	0.4292	1	-0.0995701	0.382	0.426	0.511353	1	0.223412	0.405	0.341	0.113989	1	0.352882	0.221	0.186	0.12644	1	-0.348531	0.311	0.374	0.0465569	1
Apbb1	-0.189256	0.404	0.206	2.72886e-05	0.811428	-0.928571	0.148	0.255	0.0118661	1	0.23877	0.248	0.222	0.563244	1	-0.0280509	0.342	0.332	0.703152	1	-0.168809	0.163	0.229	0.0108592	1	0.373485	0.301	0.238	0.0579953	1
Nhlrc2	-0.331391	0.342	0.132	2.73389e-05	0.812923	0.358618	0.172	0.192	0.681381	1	-0.389455	0.242	0.315	0.131423	1	0.309277	0.357	0.208	3.40845e-05	1	0.0464451	0.128	0.143	0.457586	1	0.901768	0.278	0.248	0.195704	1
Tlr3	0.0428689	0.425	0.19	2.74596e-05	0.81651	0.258933	0.23	0.22	0.849964	1	-0.394151	0.318	0.454	0.00427994	1	0.623063	0.465	0.392	0.0313236	1	0.503893	0.188	0.187	0.808131	1	-0.0355512	0.34	0.425	0.0418211	1
H2-Q7	-1.73464	0.767	0.778	2.76053e-05	0.820842	0.0843081	0.918	0.862	0.0573337	1	0.576774	0.873	0.861	0.106832	1	-0.35768	0.87	0.931	4.70142e-05	1	0.165817	0.951	0.957	0.00162107	1	0.360632	0.983	0.929	3.1763e-07	0.00944472
Ddx50	0.438101	0.671	0.439	2.76069e-05	0.820893	0.175266	0.434	0.531	0.200366	1	0.275493	0.561	0.556	0.885363	1	-0.14147	0.535	0.535	0.740255	1	0.108432	0.341	0.405	0.12599	1	-0.083247	0.55	0.48	0.275955	1
Arpc1a	0.0131611	0.877	0.635	2.76279e-05	0.821516	-0.090225	0.672	0.827	0.0365025	1	0.0503973	0.847	0.806	0.310296	1	0.228951	0.903	0.821	0.00141812	1	-0.149841	0.653	0.79	0.000367982	1	-0.0285761	0.811	0.857	0.339906	1
Pcsk7	0.528052	0.521	0.275	2.77129e-05	0.824042	0.41226	0.377	0.403	0.889446	1	-0.144914	0.389	0.444	0.271471	1	0.729394	0.535	0.438	0.00451809	1	0.153971	0.289	0.335	0.135621	1	0.212353	0.431	0.408	0.406388	1
Lonp1	0.372958	0.445	0.233	2.78767e-05	0.828915	-0.494468	0.344	0.39	0.119396	1	-0.104887	0.401	0.389	0.962435	1	0.114298	0.468	0.502	0.264702	1	0.213133	0.291	0.375	0.01124	1	0.967589	0.397	0.272	8.84461e-05	1
Tspan17	-0.138732	0.644	0.36	2.79693e-05	0.831668	-0.316051	0.385	0.553	0.00194078	1	-0.110468	0.548	0.528	0.95755	1	0.0770177	0.662	0.586	0.0722168	1	0.254323	0.388	0.471	0.0542374	1	-0.193946	0.562	0.544	0.513349	1
Orc5	0.276025	0.445	0.222	2.80042e-05	0.832704	0.158025	0.311	0.274	0.566563	1	-0.463926	0.306	0.426	0.0409782	1	0.148231	0.45	0.438	0.718787	1	0.379496	0.218	0.225	0.905284	1	0.279619	0.349	0.384	0.630957	1
Cotl1	-0.0136217	0.541	0.28	2.80533e-05	0.834164	-0.464145	0.41	0.362	0.440069	1	0.511235	0.369	0.38	0.755206	1	0.263973	0.632	0.544	0.0803904	1	0.292517	0.475	0.418	0.0272706	1	0.0670695	0.505	0.5	0.984867	1
Cep170	0.0329814	0.37	0.153	2.8203e-05	0.838616	0.372328	0.213	0.201	0.765949	1	-0.0127898	0.248	0.324	0.145118	1	0.474406	0.346	0.254	0.0161638	1	-0.256949	0.163	0.172	0.7429	1	-0.129632	0.227	0.259	0.294681	1
Snrnp200	0.217254	0.637	0.429	2.82038e-05	0.838641	-0.308229	0.336	0.425	0.0690777	1	-0.314433	0.452	0.556	0.061307	1	0.0464663	0.636	0.569	0.109457	1	0.192308	0.319	0.333	0.855429	1	-0.212788	0.471	0.507	0.0887837	1
Ppp6r2	0.119366	0.164	0.032	2.837e-05	0.843581	-0.103527	0.09	0.107	0.606396	1	-0.114029	0.083	0.139	0.151193	1	0.614633	0.149	0.111	0.143209	1	-0.998147	0.086	0.101	0.348019	1	-0.394941	0.096	0.201	5.40394e-05	1
Faf1	0.258039	0.548	0.312	2.85436e-05	0.848744	-0.802046	0.131	0.318	0.000136752	1	-0.065735	0.318	0.315	0.97399	1	-0.190176	0.524	0.507	0.77821	1	-0.348635	0.18	0.278	0.000218143	1	0.073407	0.383	0.388	0.887945	1
Katnbl1	0.52669	0.397	0.185	2.87152e-05	0.853847	0.429997	0.197	0.189	0.709103	1	-0.599841	0.318	0.333	0.482028	1	0.503609	0.383	0.285	0.00843711	1	-0.251164	0.146	0.156	0.612579	1	0.226703	0.258	0.279	0.802351	1
Smg7	0.654111	0.466	0.254	2.87255e-05	0.854153	-0.056786	0.189	0.289	0.0323432	1	0.698496	0.357	0.306	0.293081	1	0.0989408	0.424	0.372	0.13908	1	0.0224167	0.186	0.254	0.0123722	1	-0.250436	0.356	0.401	0.0892345	1
Ampd2	0.248144	0.452	0.212	2.89052e-05	0.859497	0.51488	0.385	0.327	0.239288	1	0.121367	0.344	0.315	0.650822	1	0.272108	0.461	0.449	0.823457	1	-0.108751	0.276	0.304	0.257037	1	0.474304	0.419	0.371	0.142975	1
2810013P06Rik	0.625702	0.425	0.201	2.89106e-05	0.859655	-0.596681	0.221	0.289	0.157054	1	-0.0624095	0.325	0.417	0.151083	1	-0.536003	0.428	0.447	0.360428	1	-0.388408	0.229	0.308	0.00506804	1	0.182819	0.457	0.476	0.764628	1
Cib1	0.00915234	0.555	0.291	2.89872e-05	0.861935	0.119066	0.426	0.469	0.652636	1	-0.120109	0.446	0.509	0.423567	1	-0.0701749	0.52	0.527	0.75048	1	0.196705	0.368	0.354	0.522259	1	-0.425567	0.486	0.554	0.0783181	1
Rpa1	0.0361786	0.5	0.243	2.90521e-05	0.863864	0.473589	0.377	0.415	0.868564	1	0.105449	0.471	0.444	0.670463	1	0.204153	0.498	0.491	0.904572	1	-0.501524	0.311	0.385	0.00753658	1	0.211782	0.481	0.449	0.358703	1
Tshz3	0.728329	0.26	0.09	2.92808e-05	0.870666	0.419186	0.09	0.135	0.215456	1	0.394248	0.121	0.185	0.16503	1	-0.0904043	0.171	0.146	0.44701	1	0.208097	0.094	0.07	0.133316	1	-0.501239	0.134	0.153	0.447035	1
Erlin2	0.118621	0.637	0.413	2.92974e-05	0.871158	-0.0338422	0.369	0.415	0.318869	1	0.305587	0.497	0.519	0.899637	1	0.505959	0.587	0.533	0.0366262	1	0.207631	0.298	0.344	0.281552	1	0.169252	0.5	0.418	0.0236132	1
Tor1b	0.356211	0.541	0.312	2.92988e-05	0.8712	0.453291	0.336	0.365	0.62119	1	0.506257	0.42	0.463	0.529555	1	-0.0538937	0.483	0.54	0.123824	1	0.109996	0.293	0.316	0.493923	1	0.0242148	0.471	0.401	0.175354	1
RP24-503A2.6	0.428814	0.568	0.302	2.93957e-05	0.874081	0.164314	0.393	0.434	0.598199	1	0.122162	0.471	0.426	0.732659	1	0.155164	0.52	0.549	0.427541	1	-0.169607	0.375	0.4	0.528491	1	0.305801	0.5	0.469	0.351987	1
Med12	0.658658	0.315	0.127	2.94647e-05	0.876134	0.553396	0.213	0.179	0.335758	1	-0.668333	0.185	0.278	0.0416235	1	-0.707604	0.234	0.303	0.0260602	1	-0.0416245	0.107	0.158	0.014241	1	-0.0586809	0.213	0.173	0.298107	1
Relb	0.202617	0.527	0.291	2.95239e-05	0.877894	-0.454404	0.385	0.563	0.00067408	1	-0.220645	0.452	0.611	0.0194493	1	0.0115772	0.58	0.529	0.464912	1	-0.163046	0.274	0.469	5.78307e-10	1.7196e-05	0.527494	0.493	0.582	0.199889	1
Atp5s	0.893524	0.164	0.032	2.95401e-05	0.878375	-0.121698	0.016	0.05	0.115201	1	1.52777	0.076	0.028	0.0856529	1	0.974626	0.152	0.062	0.000102529	1	-0.550843	0.032	0.065	0.0110969	1	0.838399	0.074	0.037	0.039223	1
Gm26981	-0.642906	0.027	0.175	2.96384e-05	0.881299	0.688295	0.025	0.107	0.00573951	1	-0.278043	0.102	0.102	0.891255	1	-0.00398366	0.078	0.126	0.0364558	1	0.282074	0.071	0.103	0.0730357	1	-1.27516	0.1	0.136	0.16625	1
Smarcd3	-0.0392088	0.411	0.19	2.96437e-05	0.881455	0.498953	0.303	0.264	0.322947	1	-0.842841	0.325	0.481	0.0011819	1	0.551096	0.353	0.363	0.904182	1	0.0604429	0.255	0.239	0.487255	1	-0.0171983	0.299	0.422	0.000604995	1
Atp5d	0.205436	0.89	0.688	2.97475e-05	0.884543	0.0657834	0.754	0.884	0.555047	1	-0.216566	0.828	0.87	0.168077	1	-0.274597	0.851	0.808	0.275809	1	-0.170433	0.75	0.826	0.00131874	1	-0.396667	0.789	0.864	0.000870333	1
Ppbp	0.150015	0.089	0	2.97666e-05	0.885109	-0.296432	0.008	0.003	0.485648	1	-0.765864	0.006	0.028	0.16098	1	0.272485	0.041	0.002	9.0385e-05	1	0.206322	0.002	0	0.296874	1	-0.690465	0.005	0.02	0.0517815	1
Trim62	0.780221	0.411	0.206	2.98083e-05	0.88635	-0.0107551	0.189	0.211	0.560374	1	-0.0430309	0.331	0.296	0.478689	1	0.744591	0.361	0.292	0.0384523	1	0.0617519	0.193	0.196	0.984847	1	-0.0505868	0.316	0.31	0.88459	1
H2-D1	-0.209576	1	1	2.99933e-05	0.891852	0.105689	1	1	0.0151002	1	0.0345553	1	1	0.699673	1	-0.129262	1	1	0.000186246	1	0.105659	1	1	4.59371e-05	1	0.15494	1	1	1.21106e-07	0.0036011
Pnn	0.14249	0.603	0.349	3.0041e-05	0.893271	-0.473495	0.336	0.506	0.00169931	1	-0.515037	0.471	0.694	0.000137735	1	-0.0295931	0.587	0.546	0.467639	1	-0.279464	0.278	0.45	3.84243e-08	0.00114255	-0.375875	0.536	0.68	0.000158769	1
Zfp580	1.05822	0.247	0.079	3.01333e-05	0.896012	-0.638894	0.074	0.179	0.00638345	1	-1.08425	0.064	0.194	0.000909544	1	-0.0261485	0.182	0.197	0.788341	1	0.575868	0.148	0.132	0.339286	1	-0.235259	0.122	0.204	0.00513069	1
Nap1l1	0.249616	0.644	0.376	3.01409e-05	0.89624	-0.894428	0.328	0.553	1.81654e-05	0.540148	0.531253	0.599	0.556	0.31536	1	0.0377853	0.691	0.644	0.116618	1	-0.250571	0.418	0.483	0.0412417	1	0.220112	0.524	0.588	0.165769	1
Exoc6b	0.971319	0.432	0.222	3.01841e-05	0.897525	0.188775	0.27	0.314	0.432563	1	-0.356849	0.312	0.5	0.00403348	1	0.443301	0.431	0.378	0.160428	1	-0.1926	0.261	0.306	0.0768348	1	-0.0563137	0.311	0.388	0.0279582	1
Cyb5d2	-0.0623044	0.411	0.19	3.02057e-05	0.898167	-0.672264	0.115	0.283	0.0003087	1	0.00946613	0.312	0.417	0.148504	1	0.418013	0.379	0.327	0.125252	1	-0.243922	0.146	0.218	0.00362049	1	-0.807455	0.266	0.391	1.92565e-05	0.572593
Ubxn2a	-0.234245	0.568	0.302	3.0227e-05	0.8988	0.149986	0.246	0.39	0.00884219	1	-0.30569	0.478	0.583	0.041754	1	0.540705	0.561	0.469	0.00447472	1	-0.0581338	0.218	0.302	0.00552514	1	0.274732	0.581	0.51	0.124922	1
Dnajc24	0.489841	0.281	0.101	3.03791e-05	0.903322	-0.176209	0.164	0.208	0.405563	1	-0.752661	0.185	0.361	0.000955324	1	-0.202702	0.238	0.376	0.000177742	1	0.0561302	0.111	0.125	0.506569	1	-0.695604	0.22	0.323	0.000966135	1
Ankle2	0.281407	0.514	0.291	3.04006e-05	0.903962	0.0699144	0.254	0.267	0.763056	1	0.0102061	0.395	0.491	0.11346	1	0.604013	0.506	0.4	0.00444312	1	0.0685964	0.246	0.266	0.536895	1	-0.41421	0.39	0.439	0.0884474	1
Gab3	-0.297907	0.329	0.132	3.04168e-05	0.904442	-0.834419	0.09	0.208	0.00340604	1	-0.221477	0.197	0.37	0.00252383	1	-0.180629	0.294	0.341	0.109409	1	-0.441661	0.124	0.196	0.00179097	1	-0.661081	0.256	0.337	0.00863364	1
Tns2	0.39201	0.938	0.794	3.04624e-05	0.905799	0.174484	0.836	0.884	0.952199	1	-0.0701825	0.904	0.944	0.184965	1	0.409307	0.922	0.858	1.48951e-05	0.442906	0.28398	0.841	0.844	0.0818063	1	-0.127676	0.904	0.918	0.0394691	1
Nbeal2	-0.223487	0.322	0.127	3.04882e-05	0.906568	1.62595	0.197	0.135	0.0923114	1	-1.51286	0.134	0.167	0.383106	1	0.906022	0.346	0.217	0.000179629	1	-0.20895	0.128	0.095	0.0642673	1	-0.51164	0.156	0.211	0.0609178	1
Ccdc25	0.472287	0.425	0.196	3.05559e-05	0.90858	0.151522	0.148	0.236	0.0522354	1	-0.351606	0.338	0.417	0.304132	1	-0.355932	0.383	0.429	0.151488	1	-0.274829	0.129	0.22	0.00012086	1	-0.264721	0.285	0.344	0.0768844	1
Slc39a14	1.63159	0.13	0.016	3.05758e-05	0.90917	-0.763813	0.016	0.053	0.0906572	1	-0.761721	0.025	0.037	0.595398	1	0.315635	0.104	0.084	0.348109	1	-0.0592232	0.019	0.038	0.0575256	1	-0.987747	0.026	0.054	0.0530957	1
Zbtb43	-0.174014	0.233	0.063	3.05936e-05	0.9097	0.0677549	0.057	0.085	0.362905	1	0.182938	0.089	0.167	0.0573284	1	0.565131	0.138	0.135	0.969552	1	-0.579567	0.06	0.067	0.641949	1	-0.539579	0.072	0.099	0.186003	1
Akna	1.77902	0.267	0.095	3.07961e-05	0.915722	0.00997742	0.156	0.236	0.0848074	1	-0.792213	0.172	0.315	0.00818533	1	0.548208	0.323	0.25	0.0310129	1	-0.0466518	0.143	0.218	0.00207139	1	-0.182428	0.256	0.276	0.395377	1
Mtch2	0.075008	0.74	0.471	3.08534e-05	0.917425	-0.121359	0.475	0.664	0.00820391	1	-0.00215122	0.662	0.648	0.915789	1	0.0476076	0.688	0.668	0.236366	1	-0.249388	0.432	0.524	0.00484384	1	-0.260801	0.605	0.653	0.0939873	1
Nek9	0.173857	0.404	0.206	3.09072e-05	0.919027	-0.723567	0.205	0.267	0.107808	1	-0.0280437	0.401	0.398	0.801462	1	0.391649	0.413	0.434	0.516868	1	-0.606391	0.154	0.259	1.89292e-05	0.562858	-0.499549	0.337	0.344	0.732349	1
Mthfd1l	2.16794	0.116	0.011	3.09517e-05	0.92035	0.886352	0.09	0.047	0.0851701	1	0.367516	0.076	0.074	0.938965	1	-0.0725801	0.093	0.077	0.513521	1	0.0295428	0.053	0.07	0.213229	1	1.41156	0.096	0.037	0.00271177	1
Isg20l2	0.227734	0.432	0.206	3.10771e-05	0.924077	0.257939	0.27	0.27	0.7976	1	-0.0381112	0.28	0.343	0.258517	1	0.501721	0.383	0.325	0.168707	1	0.0346921	0.152	0.204	0.029551	1	0.121069	0.333	0.323	0.791013	1
Piezo1	-0.0967547	0.685	0.434	3.12612e-05	0.929553	-0.61096	0.492	0.487	0.446249	1	-0.101879	0.51	0.565	0.343671	1	0.195799	0.71	0.65	0.107815	1	-0.258123	0.413	0.531	0.000229923	1	0.148403	0.505	0.568	0.151739	1
RP23-113M20.5	0.767999	0.212	0.058	3.12907e-05	0.93043	-0.373315	0.09	0.186	0.0196917	1	0.0853524	0.178	0.157	0.630307	1	-0.0156055	0.164	0.168	0.922587	1	0.316611	0.12	0.115	0.673861	1	0.223556	0.127	0.116	0.600723	1
Cyp51	-0.0687579	0.301	0.106	3.13639e-05	0.932606	0.988298	0.123	0.079	0.142162	1	-1.38972	0.045	0.074	0.315386	1	0.145108	0.253	0.17	0.00603466	1	0.369321	0.098	0.062	0.0239113	1	-0.325058	0.103	0.082	0.357855	1
Cmtm3	0.298186	0.897	0.725	3.14239e-05	0.934389	0.0576167	0.861	0.862	0.647944	1	-0.195716	0.841	0.889	0.169297	1	-0.202345	0.907	0.878	0.135282	1	0.246273	0.814	0.789	0.0119349	1	0.0337617	0.871	0.878	0.674289	1
Il33	0.0599306	0.438	0.222	3.1462e-05	0.935522	0.186492	0.336	0.214	0.0028309	1	-0.83754	0.433	0.537	0.0504186	1	0.362725	0.561	0.515	0.122649	1	0.379654	0.445	0.314	9.32161e-06	0.277178	-0.273528	0.593	0.724	2.33526e-05	0.694391
Cdc42bpb	0.32128	0.644	0.423	3.15243e-05	0.937376	0.346097	0.369	0.453	0.264037	1	0.369575	0.535	0.528	0.887728	1	0.0905466	0.613	0.608	0.0880153	1	-0.224461	0.37	0.402	0.222413	1	0.130841	0.51	0.507	0.875323	1
Hgsnat	-0.343456	0.521	0.254	3.15527e-05	0.938221	-0.206806	0.344	0.415	0.132971	1	0.236977	0.516	0.435	0.228421	1	0.665272	0.539	0.478	0.0417778	1	0.462119	0.313	0.345	0.640987	1	0.422439	0.565	0.422	0.000234116	1
Rcan2	0.932945	0.212	0.058	3.1563e-05	0.938526	-0.542704	0.025	0.057	0.155501	1	1.15249	0.146	0.046	0.00867605	1	0.0541516	0.178	0.093	0.000974374	1	-0.900834	0.019	0.045	0.014777	1	-0.0743269	0.065	0.034	0.0684797	1
Tgfbr3	0.621652	0.486	0.259	3.16016e-05	0.939673	0.0375803	0.393	0.362	0.776614	1	-0.224171	0.439	0.657	6.64315e-05	1	0.387531	0.468	0.416	0.0435243	1	0.306592	0.317	0.292	0.249633	1	-0.139854	0.411	0.493	0.0117014	1
Serpinb1a	1.06892	0.192	0.048	3.16037e-05	0.939736	-0.541531	0.033	0.041	0.685423	1	1.28362	0.127	0.065	0.0903772	1	-0.575831	0.182	0.179	0.931645	1	-0.233211	0.021	0.048	0.0138937	1	0.484513	0.122	0.068	0.0146444	1
Id2	0.277812	0.959	0.794	3.1617e-05	0.94013	0.0865065	0.787	0.836	0.867601	1	-0.32793	0.917	0.907	0.134381	1	0.130652	0.929	0.861	0.00790275	1	0.339916	0.722	0.696	0.00714863	1	-0.0266537	0.911	0.929	0.769389	1
Slc16a2	0.601539	0.637	0.402	3.16492e-05	0.941088	0.235863	0.508	0.516	0.952082	1	0.446945	0.516	0.593	0.796606	1	0.389262	0.543	0.449	0.00171275	1	-0.0541229	0.244	0.359	7.6655e-05	1	-0.165823	0.368	0.456	0.0775942	1
Fndc3b	0.600905	0.432	0.206	3.18471e-05	0.946972	-0.164015	0.246	0.248	0.890565	1	0.559968	0.299	0.278	0.583538	1	-0.189167	0.368	0.347	0.721895	1	-0.459246	0.154	0.18	0.196444	1	0.230141	0.309	0.265	0.283652	1
Hcls1	-0.430551	0.363	0.143	3.189e-05	0.94825	0.779746	0.27	0.28	0.906207	1	0.26243	0.344	0.306	0.690201	1	-0.626357	0.297	0.345	0.0867745	1	0.00676403	0.261	0.29	0.273904	1	0.0849216	0.28	0.32	0.315708	1
Gm38226	0.28727	0.336	0.138	3.23338e-05	0.961446	-0.229043	0.115	0.226	0.00981479	1	-0.335489	0.255	0.509	4.08859e-06	0.121574	-0.0835432	0.305	0.237	0.176446	1	-0.143723	0.094	0.153	0.00284928	1	-0.322936	0.179	0.391	9.24624e-10	2.74937e-05
Nptn	0.0677997	0.842	0.619	3.23398e-05	0.961624	0.194546	0.664	0.698	0.873981	1	0.042429	0.65	0.713	0.234687	1	0.119531	0.829	0.77	0.124831	1	0.250985	0.557	0.603	0.833096	1	-0.398781	0.682	0.697	0.110895	1
Ddit4	0.599181	0.445	0.217	3.24261e-05	0.96419	-0.160625	0.311	0.236	0.138107	1	0.100421	0.331	0.343	0.899662	1	0.371086	0.387	0.305	0.0184449	1	0.59511	0.353	0.244	7.13182e-06	0.212065	-0.42827	0.392	0.517	9.47058e-05	1
Egfl8	0.679079	0.575	0.376	3.24449e-05	0.96475	-0.598537	0.23	0.481	2.56156e-06	0.076168	-0.448476	0.484	0.546	0.0877588	1	-0.588974	0.595	0.626	0.0473879	1	-0.313346	0.281	0.452	3.43428e-07	0.0102118	-0.0667939	0.474	0.49	0.767567	1
A430105I19Rik	0.250439	0.329	0.132	3.2815e-05	0.975754	0.134867	0.156	0.167	0.784838	1	-0.209718	0.153	0.278	0.0180107	1	1.58953	0.357	0.137	2.85668e-12	8.49434e-08	-0.033743	0.092	0.115	0.225226	1	-0.0130157	0.141	0.19	0.0656072	1
Dtx2	0.902203	0.281	0.101	3.29749e-05	0.980507	0.804572	0.262	0.186	0.0643177	1	0.135255	0.21	0.296	0.124288	1	0.698245	0.257	0.261	0.669172	1	0.832918	0.246	0.184	0.00491366	1	0.212185	0.263	0.204	0.0668292	1
Nacc2	0.820246	0.342	0.148	3.30471e-05	0.982656	0.137051	0.172	0.258	0.0492427	1	0.110398	0.325	0.343	0.745836	1	0.96982	0.361	0.199	1.93032e-06	0.0573981	0.069813	0.176	0.158	0.362546	1	0.298769	0.33	0.269	0.0480206	1
Gbas	0.389927	0.555	0.323	3.30781e-05	0.983578	-0.155952	0.303	0.368	0.180478	1	-0.435759	0.51	0.685	0.00129467	1	0.250342	0.535	0.48	0.0328334	1	-0.452032	0.173	0.284	6.7203e-06	0.199828	-0.33033	0.62	0.633	0.173502	1
Apmap	0.065101	0.63	0.381	3.30885e-05	0.983887	-0.0712981	0.402	0.465	0.314364	1	0.3511	0.51	0.574	0.482458	1	0.212275	0.639	0.613	0.428104	1	-0.167311	0.364	0.445	0.0120449	1	0.280815	0.586	0.537	0.0960553	1
Mllt11	0.701197	0.24	0.079	3.31773e-05	0.986528	0.859307	0.074	0.129	0.125146	1	-0.322366	0.134	0.102	0.508317	1	0.277762	0.1	0.131	0.242477	1	-0.854549	0.049	0.108	0.000328591	1	-0.496286	0.144	0.116	0.324721	1
Gstt2	0.366276	0.404	0.18	3.33126e-05	0.990551	-0.391821	0.336	0.393	0.235758	1	-0.470231	0.293	0.528	0.000201068	1	-0.252577	0.353	0.46	0.00298405	1	-0.11363	0.287	0.335	0.123822	1	-0.382588	0.395	0.49	0.0100983	1
Rpl24	0.271607	0.925	0.608	3.33169e-05	0.990679	-0.200877	0.885	0.906	0.0106898	1	-0.348777	0.809	0.907	0.00443412	1	-0.234118	0.933	0.801	0.94405	1	-0.165935	0.773	0.844	0.000554658	1	-0.26234	0.821	0.884	0.00316879	1
Tollip	0.31886	0.808	0.614	3.34158e-05	0.993618	0.30198	0.607	0.686	0.649942	1	0.147695	0.745	0.722	0.854351	1	0.209427	0.758	0.73	0.123677	1	0.00264049	0.52	0.612	0.0283302	1	0.0808184	0.634	0.721	0.233568	1
Gas2l1	0.347281	0.521	0.302	3.35766e-05	0.998401	-0.152212	0.426	0.513	0.149575	1	-0.869441	0.433	0.519	0.0202776	1	0.319833	0.565	0.535	0.414964	1	-0.129049	0.356	0.503	1.63315e-06	0.0485617	0.146333	0.522	0.524	0.710888	1
Plp1	0.162812	0.39	0.206	0.0110065	1	-0.0215336	0	0.013	0.214799	1	1.71739	0.261	0.009	3.23364e-08	0.000961524	0.297976	0.413	0.093	8.02318e-24	2.38569e-19	-0.0217902	0.009	0.015	0.370085	1	0.432653	0.067	0.024	0.00739407	1
Ttr	-0.351013	0.356	0.201	0.053105	1	-0.318299	0.025	0.022	0.886495	1	1.34962	0.268	0	5.947e-09	0.000176834	0.670052	0.312	0.038	2.84425e-23	8.45739e-19	0.0494906	0.017	0.005	0.0585863	1	0.914471	0.062	0	1.34906e-05	0.401143
Gm38224	0.321837	0.678	0.455	0.000116215	1	0.0662013	0.59	0.497	0.0784839	1	-0.375956	0.541	0.787	6.74385e-06	0.200528	0.480219	0.658	0.325	1.88974e-20	5.61914e-16	-0.0378091	0.55	0.552	0.890826	1	-0.381955	0.562	0.738	1.42318e-10	4.23183e-06
Enpp2	1.06166	0.253	0.196	0.298472	1	0.992982	0.115	0.088	0.431831	1	0.503324	0.236	0.102	0.00240437	1	0.545652	0.309	0.053	2.7595e-20	8.20538e-16	0.811146	0.045	0.052	0.632124	1	0.662108	0.136	0.085	0.028534	1
B630005N14Rik	-0.0983245	0.808	0.815	0.403086	1	0.0460994	0.73	0.752	0.801308	1	-0.144954	0.701	0.861	0.00101395	1	0.699729	0.888	0.6	3.70904e-19	1.10288e-14	-0.349464	0.737	0.782	0.198358	1	0.0928526	0.713	0.731	0.873796	1
H2-Eb1	-1.77337	0.39	0.455	0.0204305	1	0.839942	0.623	0.613	0.506999	1	1.91177	0.675	0.685	0.77097	1	-0.925394	0.494	0.768	6.50109e-19	1.9331e-14	0.12501	0.801	0.727	0.00465331	1	-0.0385478	0.828	0.874	0.698309	1
H2-Aa	-2.29209	0.507	0.561	0.00893118	1	0.2841	0.73	0.692	0.992212	1	0.0290141	0.752	0.769	0.102149	1	-0.86968	0.587	0.834	8.48217e-18	2.52217e-13	0.0640196	0.837	0.785	0.0538066	1	0.0239864	0.878	0.901	0.851646	1
Erdr1	-1.21744	0.219	0.339	0.00238817	1	0.422872	0.246	0.226	0.52183	1	0.701605	0.408	0.259	0.00661263	1	-1.39188	0.223	0.531	3.20785e-17	9.53854e-13	-0.0098407	0.212	0.244	0.303272	1	0.0939277	0.352	0.207	6.51921e-05	1
Speg	0.520278	0.185	0.048	8.83919e-05	1	0.181462	0.115	0.091	0.470978	1	0.698518	0.108	0.046	0.0782902	1	0.842459	0.234	0.031	4.55116e-17	1.35329e-12	-0.116263	0.056	0.081	0.103476	1	-0.162215	0.038	0.085	0.00893071	1
Gm19087	0.180035	0.486	0.407	0.044603	1	-0.134048	0.541	0.607	0.319096	1	-0.136395	0.338	0.444	0.0997452	1	0.478637	0.539	0.248	4.60302e-17	1.36871e-12	-0.223993	0.583	0.615	0.0247122	1	-0.295975	0.218	0.384	8.12072e-07	0.024147
Slitrk2	0.167286	0.329	0.243	0.0839555	1	-0.0571276	0.254	0.336	0.231193	1	-0.0203247	0.159	0.204	0.375817	1	0.44488	0.368	0.108	4.7197e-17	1.4034e-12	-0.181737	0.158	0.237	0.00101541	1	-0.121554	0.153	0.207	0.0541235	1
H2-DMa	-0.400315	0.116	0.18	0.0815461	1	0.294006	0.328	0.292	0.408198	1	-0.0103875	0.268	0.315	0.439281	1	-0.890393	0.171	0.48	7.6966e-17	2.28858e-12	0.229491	0.402	0.361	0.0949779	1	-0.190718	0.483	0.398	0.0210814	1
Gnaz	0.15971	0.212	0.132	0.0480082	1	-0.135047	0.131	0.201	0.0783727	1	-0.40506	0.07	0.093	0.509313	1	1.11703	0.301	0.071	1.73903e-16	5.17101e-12	0.0680547	0.09	0.189	2.30129e-06	0.0684288	0.553137	0.072	0.082	0.5717	1
Sord	0.130956	0.932	0.926	4.82575e-05	1	0.76537	0.697	0.915	0.0257268	1	0.578774	0.866	0.972	0.00425251	1	0.00222277	0.959	0.858	2.97863e-16	8.85695e-12	-0.19013	0.647	0.797	0.000391182	1	0.0418983	0.919	0.949	0.00941377	1
RP23-170M6.3	0.128788	0.692	0.577	0.0801695	1	-0.182985	0.533	0.626	0.0239166	1	-0.401969	0.51	0.759	1.57278e-05	0.467667	0.269648	0.743	0.458	8.88637e-16	2.64236e-11	-0.0790458	0.499	0.57	0.0307379	1	-0.396552	0.459	0.721	1.03043e-13	3.06398e-09
Ppia	-0.108061	1	1	0.0873882	1	-0.16754	0.992	1	0.00359672	1	-0.31347	1	1	6.51697e-12	1.93782e-07	-0.303198	1	0.998	3.28102e-15	9.75612e-11	-0.173149	0.996	0.998	3.89032e-07	0.0115679	-0.12026	1	1	6.62392e-07	0.0196962
Grwd1	-1.13787	0.116	0.185	0.0664942	1	-1.10338	0.066	0.179	0.00344654	1	1.08714	0.197	0.148	0.243063	1	-1.19652	0.097	0.35	6.8343e-15	2.03218e-10	-0.241073	0.114	0.149	0.107987	1	1.60654	0.261	0.122	2.88162e-06	0.085685
Slc34a1	1.49448	0.151	0.069	0.0130405	1	1.2665	0.369	0.16	3.31971e-07	0.00987115	-0.189349	0.07	0.083	0.611799	1	1.54964	0.208	0.031	7.35289e-15	2.18638e-10	2.29678	0.296	0.146	6.03999e-11	1.79599e-06	-0.727402	0.026	0.061	0.0179293	1
RP23-320B19.1	0.154258	0.404	0.243	0.00538213	1	0.118486	0.369	0.318	0.13869	1	0.0735336	0.268	0.222	0.284224	1	0.329462	0.454	0.177	1.37406e-14	4.08578e-10	0.0164551	0.21	0.184	0.16644	1	-0.0115336	0.191	0.238	0.199683	1
Snhg17	-0.683622	0.103	0.143	0.24051	1	0.302616	0.066	0.138	0.0444332	1	-1.41415	0.166	0.157	0.912995	1	-0.960918	0.104	0.361	2.67621e-14	7.9577e-10	-0.377241	0.073	0.082	0.575578	1	0.824679	0.222	0.143	0.00668464	1
Kdr	0.249613	1	1	7.47072e-05	1	0.323947	1	1	2.34865e-07	0.0069837	-0.10335	1	1	0.0420322	1	0.435433	1	0.998	3.94265e-14	1.17235e-09	0.0714349	0.992	0.998	0.0627493	1	-0.172972	1	1	0.000263944	1
Gm29013	0.261948	0.281	0.153	0.00263578	1	0.00983426	0.221	0.23	0.901913	1	-0.0906911	0.127	0.176	0.230492	1	0.413539	0.305	0.088	4.48409e-14	1.33334e-09	-0.0975673	0.221	0.258	0.20556	1	-0.194269	0.077	0.201	1.65171e-06	0.0491137
Mc1r	-0.585159	0.199	0.063	0.00023581	1	-0.080783	0.008	0.057	0.0256318	1	-0.0668898	0.051	0.102	0.115991	1	0.3291	0.234	0.046	6.24779e-14	1.85778e-09	-0.0173788	0.041	0.046	0.684151	1	-0.0630296	0.041	0.065	0.148038	1
Zbtb48	-2.2143	0.116	0.159	0.247343	1	0.421777	0.172	0.145	0.469001	1	-0.164365	0.159	0.12	0.330634	1	-0.467131	0.108	0.367	7.78477e-14	2.3148e-09	0.0268576	0.081	0.119	0.0495735	1	0.821577	0.158	0.058	5.31486e-05	1
Ccdc50-ps	0.242593	0.24	0.111	0.00190486	1	-0.124881	0.008	0.072	0.0079609	1	-0.013377	0.197	0.194	0.881248	1	0.341264	0.271	0.071	1.43332e-13	4.26197e-09	-0.0415977	0.039	0.057	0.178746	1	-0.0263067	0.163	0.214	0.110099	1
Gm26745	0.122187	0.137	0.037	0.00103329	1	-0.0110278	0.025	0.038	0.516535	1	0.106762	0.096	0.019	0.0124779	1	0.267306	0.175	0.022	3.78165e-13	1.12447e-08	0.0745749	0.045	0.04	0.597987	1	-0.00635516	0.045	0.024	0.133956	1
Clu	-0.759186	0.637	0.709	0.0304651	1	0.117681	0.541	0.711	0.0283531	1	0.626867	0.822	0.546	4.45981e-06	0.132612	-1.27288	0.602	0.752	4.16836e-13	1.23946e-08	0.269055	0.278	0.543	9.21987e-17	2.74153e-12	1.50814	0.615	0.412	3.21986e-12	9.57424e-08
Eif4ebp1	-0.256215	0.247	0.238	0.943849	1	-0.584361	0.221	0.299	0.0981728	1	-0.178173	0.325	0.315	0.815556	1	-1.00364	0.182	0.447	5.33509e-13	1.58639e-08	0.338926	0.184	0.191	0.910294	1	-0.0349502	0.263	0.214	0.0792444	1
Ifitm2	-0.040362	0.986	0.989	0.896359	1	-0.129037	0.992	0.994	0.0538162	1	-0.587413	0.975	1	1.47174e-14	4.37621e-10	-0.317355	1	0.998	8.54541e-13	2.54098e-08	-0.207905	0.977	0.995	8.50327e-07	0.0252845	-0.259497	0.995	1	5.39239e-11	1.60343e-06
Rorb	-0.0153102	0.267	0.302	0.544132	1	-0.128596	0.221	0.311	0.0736704	1	-0.31761	0.255	0.444	0.00146279	1	0.41561	0.409	0.168	1.19668e-12	3.55833e-08	-0.0968368	0.248	0.29	0.141642	1	-0.463375	0.146	0.442	1.66277e-18	4.94424e-14
Peg12	-0.300782	0.466	0.249	0.000129346	1	0.232999	0.303	0.374	0.199456	1	-0.346635	0.255	0.324	0.18347	1	0.106268	0.494	0.23	1.19897e-12	3.56515e-08	0.157668	0.216	0.314	0.000395894	1	-0.0277804	0.215	0.303	0.00654193	1
Gm37072	0.142626	0.192	0.138	0.147768	1	0.0783935	0.164	0.113	0.155729	1	0.0113042	0.057	0.056	0.93022	1	0.214292	0.23	0.051	1.35507e-12	4.0293e-08	-0.0645264	0.129	0.141	0.594509	1	-0.0152999	0.043	0.051	0.61756	1
Ctgf	-1.91118	0.432	0.481	0.331431	1	1.43721	0.426	0.469	0.858914	1	-0.0926396	0.694	0.583	0.123156	1	-0.568143	0.442	0.675	1.93436e-12	5.75182e-08	-0.54545	0.358	0.497	4.73061e-06	0.140665	0.183684	0.608	0.486	7.05071e-05	1
Rps19	-0.0964143	0.979	0.937	0.110061	1	-0.151337	0.951	0.987	0.0148915	1	-0.5993	0.943	1	1.41253e-10	4.20015e-06	-0.429716	0.97	0.965	2.01332e-12	5.98661e-08	-0.420274	0.901	0.954	4.93827e-13	1.46839e-08	-0.225964	0.964	0.986	1.54867e-06	0.0460496
Npr3	-0.114685	0.007	0.063	0.00792077	1	-0.0246983	0.049	0.088	0.185781	1	0.124162	0.121	0.046	0.0370267	1	-1.03701	0.067	0.288	2.80105e-12	8.32892e-08	-0.394668	0.124	0.182	0.00932272	1	0.527551	0.249	0.105	1.66412e-06	0.0494826
Chchd10	0.195107	0.281	0.217	0.268067	1	-0.00144183	0.27	0.591	1.7281e-08	0.000513852	0.595441	0.478	0.231	1.59084e-05	0.473037	-1.08089	0.405	0.637	3.03043e-12	9.011e-08	-1.33617	0.276	0.586	6.00027e-27	1.78418e-22	0.852181	0.488	0.33	4.07283e-08	0.00121105
Cldn11	-0.0211635	0.219	0.164	0.282871	1	-0.0106415	0	0.006	0.382468	1	0.584338	0.229	0.028	3.57107e-06	0.106186	0.345717	0.19	0.033	3.08943e-12	9.18641e-08	0.265683	0.006	0.003	0.581626	1	0.115699	0.038	0.014	0.0481265	1
Mbp	-0.369582	0.26	0.228	0.939027	1	-0.132558	0.025	0.035	0.589294	1	0.853278	0.268	0.028	2.19487e-07	0.00652643	0.404201	0.219	0.049	3.39292e-12	1.00888e-07	-0.260375	0.009	0.046	0.000225852	1	0.79372	0.067	0.014	0.000722571	1
Esm1	0.0551625	0.863	0.899	0.634538	1	0.605102	0.689	0.943	1.10431e-09	3.28367e-05	-0.441254	0.936	0.796	8.89275e-05	1	-0.618372	0.877	0.982	3.53621e-12	1.05149e-07	-0.708625	0.799	0.959	1.89493e-31	5.63458e-27	0.802658	0.952	0.813	2.79924e-13	8.32354e-09
Fancg	0.0333958	0.226	0.127	0.0218885	1	1.03751	0.115	0.082	0.265881	1	-0.861295	0.096	0.157	0.111942	1	0.97172	0.249	0.064	5.37907e-12	1.59947e-07	0.453548	0.081	0.053	0.0603173	1	-0.0709129	0.084	0.119	0.0891597	1
Ogfrl1	-0.501324	0.692	0.593	0.0719547	1	-0.690826	0.598	0.698	0.0121446	1	0.0779637	0.548	0.463	0.0619186	1	0.600879	0.706	0.471	7.46039e-12	2.21835e-07	-0.0799402	0.672	0.725	0.00897347	1	-0.403041	0.548	0.473	0.027352	1
Sass6	0.761749	0.644	0.54	0.00849884	1	-0.632383	0.434	0.538	0.164926	1	-0.326796	0.637	0.88	9.94153e-05	1	0.867788	0.643	0.403	7.79835e-12	2.31884e-07	-0.533971	0.383	0.5	0.000103067	1	-0.328808	0.694	0.806	5.66061e-08	0.00168318
Cldn19	0.171743	0.336	0.217	0.0168288	1	-0.311385	0.287	0.299	0.945352	1	0.0659549	0.197	0.148	0.286008	1	0.615286	0.349	0.142	8.84135e-12	2.62898e-07	-0.528188	0.231	0.265	0.186498	1	-0.136172	0.067	0.122	0.0107991	1
Ptma	-0.0498123	1	1	0.338394	1	-0.0820353	0.992	1	0.166119	1	-0.0766661	1	1	0.0266992	1	-0.2863	0.993	0.993	1.98212e-11	5.89384e-07	-0.138845	0.992	0.993	5.4778e-05	1	-0.0248979	0.993	1	0.269387	1
Rps3	-0.0924147	1	0.995	0.698479	1	-0.121679	0.984	0.997	0.0880935	1	-0.308574	0.975	0.991	8.96414e-06	0.266549	-0.471727	0.989	0.987	2.16013e-11	6.42315e-07	-0.229263	0.972	0.985	1.83331e-07	0.00545134	-0.0339807	0.964	0.986	0.459547	1
Nip7	0.467997	0.308	0.217	0.0642891	1	-0.252837	0.213	0.336	0.0152417	1	0.122114	0.331	0.296	0.59025	1	-0.464182	0.297	0.549	3.1842e-11	9.46821e-07	-0.273957	0.205	0.284	0.00220413	1	-0.0381394	0.313	0.235	0.00841641	1
Rps2	-0.15125	0.986	0.889	0.224499	1	-0.201772	0.918	0.962	0.00995105	1	0.0778775	0.949	0.963	0.648447	1	-0.492013	0.955	0.949	5.80299e-11	1.72552e-06	-0.0636742	0.895	0.957	0.0423533	1	0.103058	0.945	0.912	0.0841293	1
D630023O14Rik	0.278475	0.363	0.201	0.000881443	1	-0.135255	0.139	0.211	0.0887028	1	-0.0677554	0.159	0.25	0.09324	1	0.274769	0.327	0.122	8.86573e-11	2.63622e-06	-0.102757	0.212	0.246	0.148697	1	-0.169516	0.117	0.235	5.07069e-05	1
AA465934	0.367426	1	1	0.0124988	1	-0.291978	1	1	0.882488	1	-0.82144	0.962	0.963	0.00947621	1	0.233174	1	0.989	9.40259e-11	2.79586e-06	-0.0984887	1	0.997	0.0607259	1	-0.45088	0.988	0.966	0.814356	1
Pced1b	0.0192402	0.445	0.233	0.000223089	1	-0.500546	0.262	0.274	0.762272	1	-0.641122	0.261	0.565	7.47525e-07	0.0222276	0.599146	0.461	0.232	9.43981e-11	2.80693e-06	-0.159472	0.144	0.163	0.488319	1	-0.247231	0.237	0.395	2.8589e-06	0.0850094
Akr7a5	0.0223393	0.295	0.217	0.22632	1	0.408155	0.295	0.305	0.942078	1	-0.768077	0.344	0.269	0.254002	1	-0.515955	0.286	0.504	1.23419e-10	3.66988e-06	0.231566	0.244	0.247	0.903604	1	0.576618	0.356	0.207	1.1392e-05	0.338741
Haus7	0.927729	0.158	0.079	0.0232225	1	-0.333733	0.098	0.138	0.246358	1	-1.22506	0.083	0.231	0.000510499	1	-0.548029	0.149	0.378	1.31943e-10	3.92332e-06	0.214407	0.107	0.132	0.22753	1	-0.82133	0.065	0.17	8.23473e-06	0.24486
Cst3	-0.315678	0.993	0.979	0.0109827	1	-0.268828	0.967	0.991	0.000706045	1	-0.146587	1	1	0.164366	1	-0.416191	0.996	0.989	1.41788e-10	4.21607e-06	-0.345241	0.989	0.993	2.10334e-15	6.2543e-11	-0.128045	0.998	1	0.000421547	1
Wt1	0.121421	0.178	0.122	0.155957	1	-0.0735143	0.066	0.101	0.264441	1	0.0708595	0.07	0.028	0.130353	1	0.287052	0.175	0.035	1.56888e-10	4.66507e-06	-0.0503733	0.06	0.062	0.855918	1	-0.0566261	0.033	0.054	0.160014	1
Cd274	-0.138653	0.301	0.397	0.0496004	1	-0.0528157	0.197	0.264	0.108471	1	-0.00612296	0.274	0.407	0.0191977	1	-0.856281	0.335	0.575	2.72762e-10	8.11058e-06	-0.238797	0.229	0.301	0.00708173	1	0.039134	0.438	0.449	0.638708	1
H2-Ab1	-0.911653	0.747	0.746	0.308667	1	0.600769	0.869	0.824	0.0190873	1	0.912858	0.885	0.88	0.764519	1	-0.660093	0.807	0.894	3.34971e-10	9.96037e-06	0.245	0.944	0.907	0.000101387	1	-0.00720836	0.967	0.966	0.335856	1
Arhgap29	0.15096	0.836	0.667	0.000410293	1	0.258392	0.664	0.726	0.719186	1	-0.107151	0.803	0.889	0.0353283	1	0.469234	0.911	0.796	3.40822e-10	1.01343e-05	0.0438731	0.677	0.754	0.275519	1	-0.115643	0.761	0.878	0.0092187	1
RP23-158G17.1	-0.201729	0.349	0.169	0.000441019	1	0.219369	0.221	0.226	0.887499	1	-0.068469	0.223	0.213	0.999101	1	0.435172	0.323	0.131	4.05206e-10	1.20488e-05	-0.0318465	0.184	0.196	0.730359	1	-0.616406	0.12	0.207	0.00115377	1
Gprc5a	-0.863189	0.336	0.196	0.00793438	1	0.831205	0.098	0.142	0.26017	1	2.00805	0.197	0.102	0.0385066	1	-1.40881	0.268	0.478	4.55153e-10	1.3534e-05	-1.27794	0.039	0.086	0.00138663	1	0.116575	0.206	0.126	0.00314491	1
Tcn2	0.217272	1	0.984	0.00992262	1	0.342714	1	1	6.00548e-06	0.178573	-0.0454226	1	1	0.715442	1	0.322525	1	0.985	6.04115e-10	1.79634e-05	0.480149	0.994	0.991	6.14097e-20	1.82602e-15	0.0561656	0.998	1	0.509003	1
Gamt	0.160367	0.274	0.201	0.175706	1	-0.188963	0.164	0.28	0.0217436	1	-0.743273	0.223	0.37	0.00787891	1	-0.745794	0.197	0.414	6.50493e-10	1.93424e-05	0.4108	0.165	0.203	0.168916	1	-0.362836	0.234	0.33	0.0108696	1
Ugt1a2	0.155883	0.089	0.016	0.00182585	1	0.316706	0.18	0.057	5.5055e-05	1	-0.136563	0.038	0.093	0.0641486	1	0.327488	0.152	0.029	6.71088e-10	1.99548e-05	0.0546522	0.084	0.043	0.00518421	1	0.0387977	0.038	0.048	0.55407	1
Rpl13	0.0666315	0.993	0.942	0.178339	1	-0.26977	0.975	0.991	7.82847e-05	1	-0.242315	0.975	0.991	0.000132949	1	-0.40254	0.974	0.985	6.81466e-10	2.02634e-05	-0.418801	0.947	0.985	5.08607e-21	1.51234e-16	-0.195	0.957	0.986	1.74902e-06	0.0520071
Coasy	-0.610557	0.336	0.296	0.619464	1	0.384633	0.361	0.311	0.3082	1	0.092154	0.478	0.472	0.930446	1	-0.505934	0.294	0.529	7.20275e-10	2.14174e-05	0.669904	0.368	0.302	0.00695856	1	-0.30365	0.426	0.442	0.41589	1
Ninl	0.101646	0.13	0.053	0.0168055	1	-0.750741	0.09	0.082	0.87076	1	-1.39989	0.083	0.167	0.032292	1	1.47484	0.234	0.073	7.80775e-10	2.32163e-05	-0.168937	0.056	0.093	0.0179204	1	0.866065	0.105	0.105	0.925572	1
Iqcb1	-0.888419	0.411	0.296	0.0444751	1	-1.32071	0.279	0.267	0.8686	1	0.0397396	0.287	0.287	0.989403	1	0.0922251	0.491	0.268	8.46091e-10	2.51585e-05	-0.163561	0.266	0.278	0.642011	1	-0.622002	0.201	0.265	0.0241755	1
Nfrkb	-0.221923	0.411	0.206	0.000218417	1	0.410348	0.205	0.233	0.596253	1	-0.744152	0.312	0.426	0.0173378	1	0.791098	0.454	0.235	9.26496e-10	2.75494e-05	-0.163345	0.174	0.223	0.0686518	1	-0.306626	0.306	0.33	0.487382	1
Angptl4	-1.59246	0.021	0.063	0.0567913	1	0.0911787	0.09	0.041	0.0412673	1	-1.1213	0.089	0.111	0.520159	1	-1.20822	0.037	0.197	9.55974e-10	2.84259e-05	-0.672245	0.036	0.05	0.233261	1	1.49987	0.112	0.099	0.476113	1
Myl6	-0.0106966	0.993	0.974	0.861816	1	-0.00512736	0.975	0.984	0.953918	1	-0.434429	0.981	1	4.3378e-08	0.00128985	-0.321482	0.996	0.989	9.77726e-10	2.90727e-05	-0.203835	0.961	0.986	1.67719e-06	0.0498711	-0.268486	0.978	0.993	1.72693e-09	5.13504e-05
Prtg	0.153678	0.301	0.18	0.00825713	1	-0.249041	0.205	0.481	4.7186e-06	0.140308	-0.0858381	0.204	0.287	0.124462	1	0.129012	0.375	0.175	1.0194e-09	3.03119e-05	-0.212096	0.195	0.38	1.20018e-12	3.56874e-08	-0.723972	0.129	0.293	7.19495e-08	0.00213942
Gm9817	-0.237342	0.644	0.693	0.0529872	1	-0.330089	0.385	0.506	0.00217602	1	-0.195149	0.611	0.759	0.0118392	1	-0.431583	0.509	0.686	1.02882e-09	3.05921e-05	-0.123581	0.34	0.421	0.0222421	1	-0.131584	0.452	0.575	0.00177904	1
Stk39	0.505179	0.014	0.021	0.625696	1	-0.102373	0.025	0.035	0.589294	1	-0.000336653	0.013	0.037	0.195494	1	-1.26715	0.007	0.146	1.03273e-09	3.07083e-05	0.268574	0.023	0.015	0.385301	1	-0.0442724	0.026	0.01	0.12959	1
Ndufaf5	-0.0520355	0.103	0.09	0.703678	1	-0.276914	0.074	0.182	0.00704308	1	-0.494945	0.108	0.102	0.860462	1	-0.412856	0.089	0.288	1.19572e-09	3.55549e-05	-0.121608	0.081	0.105	0.176867	1	0.187918	0.167	0.102	0.0139224	1
Lpl	0.802393	0.37	0.254	0.0219542	1	-0.0476654	0.238	0.264	0.720926	1	-0.0891479	0.306	0.352	0.466284	1	1.69685	0.364	0.157	1.19632e-09	3.55725e-05	-0.562599	0.124	0.172	0.0240679	1	0.420311	0.165	0.197	0.230663	1
Ackr3	-0.730642	0.219	0.185	0.584804	1	-1.14567	0.148	0.242	0.0241556	1	-1.13731	0.153	0.157	0.958658	1	-1.37983	0.219	0.425	1.22591e-09	3.64525e-05	-0.631158	0.122	0.206	0.000220236	1	0.11137	0.225	0.16	0.0294802	1
Rpl18a	-0.0192691	1	0.984	0.954185	1	-0.270469	0.967	0.997	3.27403e-05	0.973533	-0.338218	0.994	0.981	3.67538e-07	0.0109287	-0.3329	0.989	0.965	1.2301e-09	3.65769e-05	-0.404247	0.968	0.981	4.89742e-19	1.45625e-14	-0.163272	0.978	1	2.14406e-05	0.637537
Gm22133	-0.139873	1	1	0.00159704	1	-0.100703	1	1	0.197873	1	-0.0413707	1	1	0.122227	1	-0.225513	0.989	0.993	1.34454e-09	3.99798e-05	-0.0621467	0.989	0.985	0.0305736	1	-0.0762573	0.988	0.997	0.0282515	1
RP23-435I16.2	0.381265	0.493	0.354	0.0238212	1	-0.167445	0.303	0.5	0.00039553	1	-0.429275	0.21	0.593	1.64527e-10	4.8922e-06	0.326093	0.509	0.279	1.41385e-09	4.20408e-05	0.336315	0.272	0.435	6.34494e-08	0.00188667	-0.621131	0.148	0.605	1.60819e-37	4.78194e-33
Ugt1a10	0.155934	0.103	0.016	0.000478899	1	0.357208	0.189	0.05	5.40218e-06	0.160634	-0.0994336	0.038	0.083	0.11686	1	0.397337	0.149	0.029	1.55306e-09	4.61802e-05	0.0959615	0.092	0.036	0.000152839	1	-0.00663924	0.031	0.054	0.120076	1
Lipt2	-0.949281	0.082	0.053	0.292243	1	-0.268475	0.057	0.101	0.165421	1	-0.810438	0.07	0.028	0.128228	1	-0.573763	0.071	0.254	1.57673e-09	4.68839e-05	-0.0418438	0.077	0.113	0.0450341	1	0.507233	0.199	0.129	0.0090847	1
Csmd2	-0.00741541	0.178	0.138	0.397676	1	-0.168923	0.049	0.123	0.0245738	1	-0.0276773	0.115	0.12	0.82195	1	0.23162	0.29	0.108	1.58705e-09	4.71909e-05	-0.0671811	0.071	0.112	0.0203077	1	-0.0172598	0.117	0.116	0.997086	1
Gm37716	0.312387	0.432	0.312	0.0602674	1	0.14905	0.238	0.34	0.137439	1	-0.00456437	0.338	0.185	0.0030355	1	0.267693	0.401	0.186	1.76801e-09	5.25719e-05	-0.112561	0.24	0.318	0.00342062	1	0.182803	0.306	0.204	0.00135208	1
D6Wsu163e	0.42747	0.438	0.275	0.00149561	1	0.186654	0.23	0.333	0.0410291	1	1.30768	0.306	0.361	0.658803	1	0.914833	0.48	0.272	1.81194e-09	5.3878e-05	-0.335747	0.174	0.266	0.000516607	1	0.0745332	0.349	0.333	0.637783	1
Aldh18a1	-0.91263	0.075	0.074	0.944262	1	0.412655	0.041	0.094	0.0744246	1	0.731242	0.083	0.093	0.764963	1	-1.04811	0.089	0.268	1.88121e-09	5.59378e-05	-0.976918	0.034	0.084	0.000431087	1	-0.193901	0.086	0.075	0.580444	1
Exog	-1.06307	0.089	0.116	0.340269	1	0.805822	0.049	0.06	0.709432	1	0.248104	0.07	0.093	0.525082	1	-0.329033	0.071	0.25	1.88817e-09	5.61447e-05	-0.812417	0.039	0.07	0.022967	1	0.198511	0.127	0.082	0.0710618	1
Ccrl2	-0.0940443	0.959	0.862	0.0621992	1	-0.275546	0.852	0.915	0.0233883	1	0.205814	0.911	0.935	0.190984	1	0.487116	0.978	0.918	1.90748e-09	5.67191e-05	0.0772619	0.867	0.878	0.618624	1	0.0484214	0.945	0.915	0.644405	1
Igf1	1.35943	0.356	0.159	5.61925e-05	1	0.558644	0.156	0.245	0.0532235	1	0.260744	0.28	0.185	0.0376974	1	-0.903443	0.394	0.566	1.92209e-09	5.71534e-05	-1.49948	0.154	0.344	5.22278e-14	1.55299e-09	0.676151	0.395	0.194	2.71247e-09	8.06552e-05
Zfp566	-0.24343	0.082	0.069	0.677598	1	0.145339	0.049	0.057	0.7845	1	-0.237202	0.121	0.12	0.971261	1	-1.67313	0.045	0.208	1.98995e-09	5.91712e-05	-0.319644	0.026	0.036	0.345357	1	0.353658	0.12	0.102	0.499921	1
Tsfm	-0.38442	0.247	0.233	0.966621	1	0.00240536	0.205	0.252	0.280328	1	0.0420783	0.318	0.306	0.847407	1	-0.600058	0.253	0.465	2.06081e-09	6.12783e-05	-0.0352657	0.159	0.206	0.0581842	1	-0.0874119	0.278	0.33	0.206459	1
Decr2	-0.507671	0.377	0.317	0.526792	1	0.228582	0.213	0.296	0.134299	1	0.571788	0.369	0.417	0.457608	1	0.485977	0.491	0.272	2.08995e-09	6.21448e-05	-0.046566	0.184	0.244	0.0102395	1	-0.1901	0.335	0.449	0.00140196	1
Rps7	-0.0478081	0.973	0.852	0.624956	1	-0.277315	0.885	0.937	0.00296186	1	-0.254138	0.911	0.935	0.0125805	1	-0.529867	0.941	0.918	2.15445e-09	6.40624e-05	-0.503263	0.788	0.911	1.75035e-15	5.20466e-11	-0.240593	0.907	0.949	5.6613e-05	1
Lect1	0.0967315	0.137	0.074	0.0632784	1	0.0945604	0.074	0.138	0.0790456	1	1.55882	0.121	0.028	0.00683131	1	-1.67013	0.067	0.235	2.22395e-09	6.61293e-05	-0.136803	0.011	0.048	0.00034764	1	0.115771	0.041	0.007	0.00567785	1
Gp1bb	0.628636	0.192	0.095	0.0146648	1	-0.355505	0.074	0.145	0.050868	1	-0.17979	0.166	0.231	0.231218	1	-0.103904	0.115	0.013	2.40519e-09	7.15184e-05	-0.270224	0.011	0.06	1.59044e-05	0.472917	-1.34553	0.081	0.184	5.73766e-05	1
Camkk2	-0.606058	0.301	0.243	0.507541	1	0.14615	0.213	0.214	0.925062	1	0.307185	0.293	0.352	0.387302	1	-0.480734	0.227	0.431	2.41785e-09	7.18948e-05	0.158931	0.129	0.167	0.0832765	1	0.0748853	0.316	0.262	0.202091	1
Ptpdc1	-1.07807	0.089	0.042	0.0855303	1	0.636988	0.016	0.047	0.135929	1	-0.34202	0.045	0.093	0.126848	1	1.27574	0.134	0.022	2.41991e-09	7.19559e-05	-0.277187	0.023	0.058	0.00291697	1	0.648175	0.05	0.037	0.428513	1
Gm525	0.616874	0.082	0.042	0.119142	1	-0.0394741	0.057	0.069	0.642354	1	-0.0269979	0.089	0.093	0.949057	1	-0.928979	0.078	0.259	2.54195e-09	7.5585e-05	-0.446105	0.088	0.136	0.0118666	1	0.702437	0.091	0.065	0.190017	1
Pcdhb11	0.863805	0.082	0.016	0.00392214	1	0.808759	0.057	0.038	0.359292	1	-1.6788	0.025	0.046	0.34945	1	1.08582	0.097	0.007	2.8886e-09	8.58924e-05	1.52958	0.028	0.031	0.80588	1	0.615234	0.029	0.031	0.90502	1
Rexo2	-0.972368	0.582	0.534	0.37513	1	-0.58288	0.451	0.585	0.00573269	1	0.189508	0.592	0.556	0.234032	1	-0.837465	0.584	0.71	3.67633e-09	0.000109316	-0.231557	0.326	0.483	9.53232e-07	0.0283444	0.342152	0.636	0.571	0.0029761	1
Ugt1a1	0.143998	0.089	0.016	0.00184501	1	0.317527	0.164	0.047	5.80853e-05	1	-0.0994336	0.038	0.083	0.11686	1	0.310643	0.145	0.029	3.69611e-09	0.000109904	0.0712122	0.084	0.036	0.000776343	1	0.0147088	0.029	0.044	0.268978	1
Lrch2	-0.0334553	0.068	0.005	0.00140743	1	-0.318872	0	0.009	0.283573	1	-0.147443	0.025	0.019	0.730103	1	1.53048	0.074	0	4.26231e-09	0.00012674	-0.191767	0.008	0.014	0.315012	1	0.289345	0.05	0.037	0.396768	1
Rai2	0.0988884	0.048	0	0.00240418	1	-0.0393339	0.049	0.063	0.583556	1	-0.917857	0.07	0.056	0.62436	1	1.90871	0.1	0.009	4.31597e-09	0.000128336	-0.343425	0.043	0.065	0.100119	1	0.594453	0.124	0.116	0.698462	1
Eef1a1	-0.0452551	1	1	0.125556	1	-0.0672897	1	1	0.0402257	1	0.209358	1	0.991	2.53386e-07	0.00753445	-0.162031	1	1	4.34092e-09	0.000129077	-0.0519267	1	1	0.00980065	1	0.121062	1	1	9.1554e-06	0.272236
Ifitm3	-0.13766	0.993	1	0.108566	1	-0.241354	1	0.997	0.00143729	1	-0.311625	1	1	5.57557e-06	0.16579	-0.257746	1	0.998	4.44869e-09	0.000132282	-0.236141	1	0.998	5.9871e-10	1.78026e-05	-0.321083	0.998	1	1.67814e-19	4.98994e-15
Ovca2	0.389657	0.329	0.153	0.000272048	1	0.1841	0.262	0.255	0.879921	1	-0.958001	0.223	0.361	0.00654586	1	-1.08292	0.283	0.478	4.50513e-09	0.00013396	-0.173899	0.193	0.225	0.230906	1	0.0370767	0.323	0.371	0.328123	1
RP23-214I6.4	-0.757603	0.26	0.201	0.267711	1	-0.581872	0.123	0.23	0.020223	1	0.438568	0.172	0.111	0.161038	1	0.342079	0.268	0.102	4.77682e-09	0.000142039	0.0771538	0.137	0.201	0.00537464	1	-0.151106	0.072	0.218	2.09417e-08	0.000622703
Tyms	-0.218746	0.336	0.228	0.0350977	1	-0.683275	0.18	0.201	0.519439	1	0.221432	0.248	0.231	0.698152	1	-1.43666	0.223	0.42	4.93982e-09	0.000146886	-0.148154	0.116	0.196	0.000483243	1	0.106638	0.299	0.228	0.0214179	1
RP23-323D23.1	0.0403308	0.178	0.138	0.330079	1	-0.100023	0.057	0.151	0.00973127	1	-0.0751482	0.108	0.185	0.0805867	1	0.275266	0.264	0.1	5.03187e-09	0.000149623	-0.0772549	0.053	0.096	0.00675664	1	-0.206523	0.108	0.224	2.85872e-05	0.850039
Klhl32	0.12257	0.226	0.127	0.0185296	1	0.0508766	0.115	0.148	0.481873	1	-0.352843	0.076	0.111	0.315265	1	0.82068	0.212	0.066	5.11612e-09	0.000152128	0.178643	0.161	0.119	0.0388067	1	-0.514884	0.041	0.112	0.000199119	1
N6amt2	0.105282	0.103	0.074	0.348392	1	-0.618993	0.057	0.123	0.0408051	1	-0.294678	0.121	0.093	0.528326	1	-0.45107	0.063	0.237	5.27437e-09	0.000156833	-1.00393	0.041	0.084	0.0031375	1	0.821742	0.144	0.116	0.25212	1
Pde2a	0.252847	1	0.979	0.00162213	1	0.353229	0.992	0.987	0.000410966	1	-0.0538535	1	1	0.594336	1	0.367102	0.996	0.991	6.70367e-09	0.000199334	0.153178	0.994	0.99	0.00336319	1	-0.262262	1	0.997	3.76258e-08	0.0011188
Golga4	-0.560286	0.322	0.19	0.0165134	1	-0.0629993	0.123	0.195	0.0916945	1	0.0466745	0.248	0.296	0.339472	1	-0.739146	0.26	0.48	6.80877e-09	0.000202459	-0.898893	0.107	0.191	9.03479e-05	1	-0.0208857	0.249	0.299	0.0988517	1
Igf2bp2	0.924449	0.349	0.201	0.00189499	1	0.51827	0.18	0.248	0.192428	1	0.559667	0.178	0.352	0.00409083	1	0.209681	0.39	0.184	7.25294e-09	0.000215666	0.961685	0.128	0.199	0.000969051	1	-0.335755	0.089	0.296	7.44952e-13	2.21512e-08
Gm15270	-1.41896	0.24	0.238	0.920606	1	1.1035	0.254	0.239	0.54757	1	-0.200272	0.401	0.343	0.485431	1	-0.587092	0.268	0.482	7.30344e-09	0.000217168	-0.623966	0.176	0.296	8.38378e-06	0.249292	0.125524	0.39	0.262	0.000512392	1
Jup	0.203892	1	1	0.00162847	1	0.197502	1	1	0.00129446	1	-0.0243093	1	1	0.588701	1	0.27312	1	0.996	7.38547e-09	0.000219607	0.232973	0.998	1	5.33089e-08	0.00158514	-0.159879	1	0.997	3.40406e-05	1
Cd68	-1.2356	0.062	0.095	0.243424	1	-1.69032	0.008	0.069	0.00986167	1	0.511966	0.108	0.056	0.134955	1	-1.42811	0.004	0.124	8.60097e-09	0.00025575	-0.159959	0.002	0.015	0.0162675	1	1.05436	0.084	0.02	0.000275129	1
Ankrd28	-0.29032	0.24	0.106	0.00263807	1	0.12542	0.066	0.085	0.482459	1	-0.421574	0.07	0.12	0.142589	1	1.19611	0.29	0.117	8.61962e-09	0.000256304	-0.0476583	0.09	0.108	0.307604	1	-0.219549	0.11	0.187	0.00600051	1
Rab11fip3	0.133715	0.219	0.085	0.000609444	1	0.467031	0.131	0.123	0.876628	1	-0.0604489	0.146	0.13	0.758667	1	1.15365	0.201	0.058	8.6564e-09	0.000257398	0.334676	0.081	0.089	0.59102	1	0.579872	0.22	0.119	0.000714059	1
Hspbap1	0.757294	0.13	0.053	0.0122371	1	-0.457641	0.041	0.05	0.657602	1	-0.701875	0.032	0.037	0.809004	1	0.842944	0.16	0.038	9.05597e-09	0.000269279	0.515679	0.045	0.034	0.353343	1	-0.119305	0.086	0.058	0.14994	1
Zxdc	-1.07266	0.021	0.074	0.0262463	1	1.17757	0.049	0.025	0.183851	1	1.04349	0.057	0.065	0.808005	1	-1.21675	0.045	0.199	9.17467e-09	0.000272809	-0.718216	0.036	0.06	0.056365	1	-0.388564	0.089	0.095	0.754328	1
S100b	0.170025	0.212	0.106	0.0110604	1	-0.17479	0.131	0.214	0.0551347	1	0.034971	0.134	0.139	0.985797	1	0.496851	0.212	0.069	1.03335e-08	0.000307265	-0.116474	0.122	0.163	0.0459817	1	-0.41633	0.048	0.112	0.00120498	1
Rpl19	0.0360005	0.986	0.921	0.557537	1	-0.0725722	0.967	0.965	0.23286	1	-0.276782	0.949	0.954	0.000337576	1	-0.401933	0.981	0.916	1.05576e-08	0.000313932	-0.214879	0.936	0.959	2.19672e-06	0.0653195	-0.253687	0.9	0.969	8.9325e-08	0.00265608
Tpbg	1.19869	0.068	0.021	0.0328022	1	-0.159191	0	0.019	0.127564	1	-0.548734	0.019	0.019	0.991717	1	0.614618	0.071	0	1.05952e-08	0.000315047	-0.248757	0.004	0.007	0.476548	1	0.59733	0.005	0.007	0.72406	1
Rplp1	0.221091	0.986	0.947	0.000599504	1	-0.141585	0.975	1	0.016744	1	-0.441755	0.975	0.981	9.99906e-10	2.97322e-05	-0.303493	0.993	0.967	1.10761e-08	0.000329347	-0.340539	0.989	0.993	1.13292e-16	3.36873e-12	-0.311166	0.959	0.993	3.99903e-12	1.18911e-07
Ttll7	1.31462	0.13	0.063	0.0365216	1	1.00175	0.082	0.044	0.106033	1	-0.486772	0.127	0.102	0.580699	1	0.522409	0.23	0.08	1.13979e-08	0.000338917	0.47052	0.047	0.057	0.485833	1	-0.61977	0.103	0.126	0.395832	1
Bst2	-0.269852	0.904	0.905	0.409601	1	-0.00282095	0.934	0.978	0.663502	1	-0.28025	0.898	0.963	0.030203	1	-0.517811	0.959	0.973	1.16019e-08	0.000344982	-0.437254	0.91	0.96	1.31089e-13	3.89794e-09	-0.141263	0.938	0.959	0.174205	1
Zfp593	-0.185464	0.123	0.143	0.727548	1	0.232125	0.09	0.157	0.070704	1	-0.194415	0.178	0.12	0.245575	1	-1.09903	0.115	0.296	1.29508e-08	0.000385093	-0.21857	0.084	0.119	0.0638495	1	0.537033	0.234	0.088	4.08037e-07	0.012133
Prmt2	-0.0229199	0.411	0.333	0.246319	1	-0.0136485	0.32	0.365	0.38056	1	0.03495	0.389	0.472	0.283798	1	-0.877342	0.346	0.54	1.30158e-08	0.000387026	0.274302	0.336	0.275	0.0149958	1	0.309218	0.423	0.405	0.426879	1
Tie1	0.264164	1	0.979	0.000498017	1	0.0271827	0.984	0.994	0.931592	1	0.0653361	0.994	1	0.880071	1	0.363001	1	0.976	1.40132e-08	0.000416683	0.208799	0.994	0.997	0.000356594	1	-0.0683606	0.998	0.997	0.082107	1
Cd82	0.26142	0.178	0.101	0.045384	1	-0.273277	0.107	0.154	0.196481	1	0.611881	0.166	0.046	0.0029563	1	-0.861748	0.126	0.305	1.64733e-08	0.000489835	-0.220214	0.058	0.129	6.1159e-05	1	1.16003	0.134	0.082	0.0213015	1
Fau	0.105963	1	0.958	0.0689776	1	-0.156475	0.951	0.987	0.0841091	1	-0.495386	0.987	1	1.25911e-11	3.74398e-07	-0.378232	0.985	0.967	1.65018e-08	0.000490682	-0.306568	0.936	0.96	1.98752e-11	5.90989e-07	-0.323783	0.971	0.993	2.38879e-13	7.10306e-09
Cic	-0.424245	0.144	0.138	0.822597	1	-0.0415228	0.18	0.214	0.440922	1	-1.22074	0.229	0.259	0.375968	1	-1.19007	0.126	0.327	1.68239e-08	0.000500259	-0.1259	0.12	0.155	0.0824095	1	-0.263737	0.201	0.269	0.0198828	1
Tek	-0.0780493	1	0.984	0.692593	1	0.175197	1	0.987	0.157334	1	0.269459	0.981	0.991	0.0580429	1	0.327674	0.985	0.989	1.78707e-08	0.000531386	0.263411	0.979	0.974	1.21492e-06	0.0361255	-0.0642857	0.99	0.997	0.0822047	1
Ugt1a9	0.143998	0.089	0.016	0.00184501	1	0.308949	0.164	0.047	6.07836e-05	1	-0.0994336	0.038	0.083	0.11686	1	0.303049	0.138	0.029	1.85289e-08	0.000550957	0.056557	0.083	0.04	0.00298061	1	0.0147088	0.029	0.044	0.268978	1
Ugt1a6a	0.157074	0.096	0.016	0.000933323	1	0.308949	0.164	0.047	6.07836e-05	1	-0.0994336	0.038	0.083	0.11686	1	0.30076	0.138	0.029	1.85289e-08	0.000550957	0.180875	0.084	0.036	0.00077124	1	0.0147088	0.029	0.044	0.268978	1
Ugt1a5	0.143998	0.089	0.016	0.00184501	1	0.308949	0.164	0.047	6.07836e-05	1	-0.0994336	0.038	0.083	0.11686	1	0.30076	0.138	0.029	1.85289e-08	0.000550957	0.0611728	0.083	0.036	0.00115852	1	0.0147088	0.029	0.044	0.268978	1
Ugt1a6b	0.143998	0.089	0.016	0.00184501	1	0.308949	0.164	0.047	6.07836e-05	1	-0.0994336	0.038	0.083	0.11686	1	0.30076	0.138	0.029	1.85289e-08	0.000550957	0.121423	0.084	0.036	0.00077124	1	0.0147088	0.029	0.044	0.268978	1
Ugt1a8	0.143998	0.089	0.016	0.00184501	1	0.308949	0.164	0.047	6.07836e-05	1	-0.088762	0.038	0.083	0.11686	1	0.30076	0.138	0.029	1.85289e-08	0.000550957	0.114912	0.086	0.036	0.000515886	1	0.0147088	0.029	0.044	0.268978	1
Ece2	-0.338555	0.075	0.069	0.813921	1	-1.50494	0.041	0.123	0.0113351	1	-0.906053	0.115	0.185	0.0978643	1	-0.513419	0.089	0.263	2.04156e-08	0.000607056	-0.050688	0.079	0.113	0.0614747	1	0.577878	0.115	0.116	0.915194	1
Gtpbp6	0.417698	0.322	0.238	0.104684	1	0.0829573	0.246	0.314	0.220977	1	0.0524185	0.287	0.324	0.462967	1	-0.790231	0.353	0.542	2.04614e-08	0.000608419	-0.289391	0.178	0.242	0.0164991	1	-0.234484	0.282	0.289	0.935393	1
Slc34a2	0.201112	0.993	0.968	0.00200603	1	0.00349078	0.943	0.981	0.634588	1	0.113054	0.949	0.935	0.692412	1	0.28066	0.989	0.962	2.0553e-08	0.000611142	-0.0529906	0.97	0.964	0.336185	1	0.185677	0.94	0.905	1.41428e-05	0.420535
Aim1l	0.109443	0.233	0.09	0.000473353	1	0.181911	0.131	0.107	0.460584	1	-0.161061	0.127	0.222	0.0343898	1	0.196879	0.301	0.128	2.21637e-08	0.000659039	0.0795352	0.098	0.096	0.819348	1	-0.352159	0.132	0.289	2.74581e-07	0.00816467
F2r	0.356052	0.986	0.958	7.08716e-05	1	0.154861	0.959	0.978	0.164965	1	-0.280726	0.994	0.991	0.00274668	1	0.369347	0.993	0.951	2.23063e-08	0.000663279	0.049435	0.904	0.928	0.510261	1	0.176851	0.978	0.983	0.208438	1
mmu-mir-5121	0.0749437	0.959	0.847	0.0914982	1	-0.177756	0.844	0.934	0.0232826	1	-0.168249	0.917	0.907	0.00901531	1	-0.329711	0.918	0.914	2.25308e-08	0.000669952	-0.240626	0.882	0.918	3.78523e-07	0.0112554	-0.254789	0.907	0.908	5.24331e-07	0.015591
Alg3	0.295362	0.295	0.159	0.00263802	1	-0.166741	0.238	0.343	0.0320224	1	0.0758583	0.236	0.269	0.528369	1	-0.705571	0.268	0.462	2.34158e-08	0.000696269	-0.517978	0.12	0.21	8.20152e-05	1	0.144535	0.289	0.19	0.00210642	1
Kti12	-0.738037	0.459	0.423	0.934546	1	-0.346317	0.32	0.425	0.0537315	1	0.134119	0.471	0.37	0.102967	1	-0.709115	0.468	0.624	2.40158e-08	0.000714109	-0.408639	0.225	0.387	3.76595e-08	0.00111981	0.40262	0.488	0.405	0.00349073	1
Manba	0.784272	0.178	0.079	0.00532188	1	-1.3581	0.09	0.145	0.095781	1	-0.0108124	0.159	0.167	0.843887	1	1.09156	0.186	0.055	2.49903e-08	0.000743087	-0.593944	0.079	0.131	0.00565533	1	0.725302	0.194	0.129	0.0194141	1
Rps14	-0.14386	0.993	0.984	0.0722548	1	-0.0972076	1	1	0.102184	1	-0.434397	0.968	1	3.34559e-09	9.94811e-05	-0.30745	0.993	0.985	2.62869e-08	0.000781641	-0.246812	0.987	0.988	2.36627e-09	7.03609e-05	-0.241661	0.986	0.993	7.4561e-09	0.000221707
Fam171b	0.0307182	0.027	0	0.0224449	1	-0.25	0.016	0.009	0.545558	1	1.13606	0.07	0.009	0.020077	1	0.908681	0.067	0	2.63055e-08	0.000782193						1.79047	0.079	0.01	3.67525e-05	1
RP24-80F7.5	-1.06068	0.089	0.074	0.715918	1	-0.3618	0.025	0.088	0.0216515	1	1.43913	0.089	0.093	0.977782	1	-1.32334	0.089	0.254	2.63057e-08	0.000782199	-0.124889	0.079	0.069	0.561445	1	0.414437	0.12	0.034	6.79891e-05	1
Polr2h	-0.141518	0.171	0.164	0.985335	1	-0.280764	0.131	0.154	0.494478	1	-0.652836	0.178	0.259	0.107398	1	-0.836429	0.164	0.352	2.67861e-08	0.000796485	-0.103797	0.096	0.141	0.0269743	1	-0.135122	0.199	0.259	0.0582652	1
2610020H08Rik	0.171944	0.24	0.122	0.006693	1	-0.30499	0.164	0.138	0.583427	1	0.60455	0.191	0.222	0.538292	1	0.551928	0.305	0.128	2.77175e-08	0.000824179	0.552375	0.092	0.12	0.132212	1	0.441464	0.129	0.245	0.00021289	1
mt-Nd1	-0.130087	1	1	0.0468044	1	-0.172514	1	1	0.000567529	1	-0.164292	1	1	0.000179758	1	-0.280601	1	1	2.80123e-08	0.000832945	-0.32856	1	1	2.06456e-16	6.13897e-12	-0.0556692	1	1	0.453955	1
Grk6	0.53877	0.151	0.132	0.635609	1	-0.17586	0.115	0.142	0.460844	1	0.320543	0.166	0.176	0.886966	1	-1.02519	0.164	0.356	2.80628e-08	0.000834448	-1.14414	0.058	0.122	0.000199461	1	0.372349	0.187	0.143	0.118522	1
Gm4034	0.116925	0.137	0.069	0.0377028	1	-0.028776	0.041	0.057	0.504333	1	0.00480617	0.064	0.074	0.709823	1	0.245786	0.145	0.033	2.88707e-08	0.00085847	-0.108183	0.038	0.074	0.00782328	1	-0.0493522	0.069	0.092	0.274962	1
Bhlhe41	0.13008	1	1	0.0484641	1	-0.010761	1	1	0.749982	1	-1.25105	1	1	7.76927e-05	1	0.227903	1	1	3.0937e-08	0.00091991	0.00486549	1	1	0.952121	1	-0.149709	1	1	0.931434	1
Gpc3	0.135342	0.103	0.005	3.87704e-05	1	-0.023206	0.033	0.041	0.689114	1	0.0521836	0.038	0	0.0405821	1	0.171611	0.104	0.013	3.24201e-08	0.000964011	0.0139695	0.013	0.003	0.0718422	1	0.0108797	0.01	0.003	0.330279	1
Mog	-0.014967	0.089	0.116	0.461006	1	0.257036	0.008	0	0.107527	1	0.264435	0.134	0	7.90522e-05	1	0.523098	0.104	0.013	3.26065e-08	0.000969556	0.0181187	0.004	0.003	0.930515	1	0.0303609	0.017	0	0.0259347	1
A330009N23Rik	0.151852	0.233	0.164	0.147639	1	-0.152175	0.205	0.236	0.53549	1	-0.141331	0.287	0.333	0.410548	1	-0.698062	0.253	0.449	3.38148e-08	0.00100548	0.0690722	0.238	0.247	0.89362	1	0.550835	0.356	0.282	0.0280607	1
Cthrc1	0.53707	0.185	0.148	0.40715	1	1.39557	0.148	0.148	0.977808	1	1.69977	0.108	0.102	0.848469	1	-0.499073	0.178	0.369	3.4359e-08	0.00102167	0.663118	0.111	0.103	0.614334	1	1.06405	0.244	0.16	0.00379747	1
Olr1	0.246425	0.089	0.005	0.000159908	1	-0.119436	0.025	0.022	0.883933	1	-0.800745	0.032	0.056	0.339189	1	0.20919	0.108	0.015	3.83675e-08	0.00114086	-0.0143351	0.021	0.026	0.568112	1	-0.000705085	0.043	0.054	0.51925	1
RP24-232H5.3	0.0455432	0.212	0.132	0.0643853	1	-0.0126046	0.148	0.204	0.230853	1	0.0246429	0.064	0.046	0.563021	1	0.270731	0.234	0.086	3.87652e-08	0.00115268	-0.0278904	0.18	0.189	0.699465	1	-0.0400452	0.05	0.065	0.423532	1
Dcn	-0.147549	0.034	0.111	0.00957629	1	-0.952702	0.041	0.107	0.0329378	1	0.621316	0.025	0.019	0.711153	1	-1.16746	0.03	0.168	4.28512e-08	0.00127418	-0.85615	0.038	0.107	7.46494e-06	0.22197	-0.00268823	0.026	0.01	0.127271	1
Rab40c	-1.65788	0.116	0.127	0.642901	1	-0.237362	0.066	0.138	0.0307061	1	-0.317723	0.14	0.213	0.1245	1	-1.13067	0.13	0.301	4.29565e-08	0.00127731	-0.169954	0.129	0.155	0.23936	1	-0.119369	0.165	0.173	0.914579	1
4931406P16Rik	0.205952	0.904	0.81	0.00111528	1	0.180774	0.779	0.789	0.410939	1	0.0160374	0.847	0.796	0.728197	1	0.38626	0.926	0.812	4.43955e-08	0.0013201	0.314204	0.659	0.711	0.986797	1	0.19537	0.809	0.776	0.658949	1
E130218I03Rik	-0.149871	0.103	0.138	0.413713	1	0.193357	0.09	0.145	0.128336	1	-0.231243	0.166	0.111	0.247067	1	-1.06107	0.112	0.283	4.47348e-08	0.00133019	-0.183708	0.079	0.117	0.0373652	1	0.531863	0.227	0.085	6.85717e-07	0.0203898
Slc6a1	0.20715	0.233	0.106	0.00185435	1	-0.0637163	0.131	0.157	0.446622	1	-0.00306342	0.115	0.12	0.890746	1	0.229604	0.245	0.091	4.53168e-08	0.00134749	-0.15973	0.088	0.179	1.62794e-05	0.484067	-0.142062	0.079	0.16	0.00098146	1
Ddx23	0.278653	0.514	0.354	0.00365628	1	-0.484635	0.385	0.513	0.00955291	1	-0.877289	0.389	0.509	0.013486	1	-0.761933	0.587	0.365	4.72499e-08	0.00140498	0.0932711	0.332	0.466	1.26413e-05	0.37589	0.0764531	0.347	0.439	0.0100809	1
Tmem255b	-0.0201033	0.13	0.106	0.550856	1	-1.10573	0.041	0.138	0.00391138	1	1.70847	0.146	0.065	0.0354038	1	-0.711257	0.197	0.376	4.84441e-08	0.00144049	-1.1298	0.06	0.191	1.6854e-10	5.01153e-06	1.16365	0.225	0.034	1.19103e-12	3.54153e-08
Zc3h7b	0.875737	0.247	0.111	0.00122337	1	0.123446	0.189	0.179	0.799466	1	0.473237	0.172	0.231	0.23621	1	1.4014	0.29	0.126	4.84654e-08	0.00144112	-0.037963	0.148	0.196	0.0523689	1	-0.370085	0.172	0.241	0.0171047	1
Dact1	0.942285	0.075	0.037	0.126024	1	0.06134	0.008	0.06	0.0216046	1	-0.0763322	0.051	0.019	0.173457	1	0.637554	0.112	0.018	4.98805e-08	0.0014832	-0.468834	0.008	0.019	0.0992191	1	0.260894	0.041	0.014	0.0370422	1
Mobp	-0.197914	0.164	0.164	0.85516	1	0.0157352	0.025	0.013	0.364856	1	0.455892	0.21	0.037	4.76039e-05	1	0.277003	0.16	0.042	5.08063e-08	0.00151073	0.0451491	0.021	0.014	0.366431	1	0.110895	0.05	0.003	0.000379181	1
Gm6472	-0.0727189	0.877	0.767	0.785471	1	-0.293684	0.689	0.818	0.00290827	1	-0.239236	0.834	0.815	0.0306805	1	-0.539361	0.81	0.819	5.14229e-08	0.00152906	-0.480411	0.604	0.749	7.26781e-13	2.16108e-08	-0.235653	0.787	0.847	0.00013917	1
Zbtb10	1.15525	0.068	0.079	0.708929	1	-0.0657664	0.074	0.088	0.634146	1	0.325662	0.076	0.074	0.958815	1	-1.86779	0.052	0.199	5.22949e-08	0.00155499	0.0648058	0.043	0.04	0.759535	1	-0.635353	0.079	0.099	0.366231	1
Atp2b4	0.684093	0.377	0.175	4.49016e-05	1	0.154293	0.148	0.151	0.9425	1	1.07289	0.217	0.259	0.514505	1	0.00522234	0.379	0.19	5.46865e-08	0.0016261	-0.265013	0.135	0.208	0.00246776	1	-0.588421	0.199	0.255	0.0439015	1
Gm7389	0.198694	0.295	0.228	0.115364	1	-0.0765335	0.18	0.277	0.0629131	1	-0.112795	0.166	0.25	0.108177	1	0.271097	0.294	0.131	5.53783e-08	0.00164667	-0.0271281	0.161	0.211	0.054273	1	-0.0463703	0.158	0.262	0.00173141	1
Eif2a	-0.049758	0.548	0.354	0.000674333	1	-0.298881	0.369	0.403	0.45421	1	0.292725	0.459	0.472	0.732175	1	-0.0398056	0.643	0.427	5.67013e-08	0.00168601	-0.0831878	0.304	0.387	0.0050754	1	0.318911	0.368	0.473	0.0560708	1
Gm10062	0.212387	0.349	0.206	0.00884784	1	-0.195263	0.131	0.286	0.00162336	1	0.327687	0.331	0.083	1.23027e-06	0.0365821	0.359172	0.342	0.173	6.25937e-08	0.00186122	-0.239672	0.159	0.278	1.19296e-06	0.0354725	0.187302	0.323	0.163	5.02366e-06	0.149379
RP24-121I11.1	0.212387	0.349	0.206	0.00884784	1	-0.195263	0.131	0.286	0.00162336	1	0.327687	0.331	0.083	1.23027e-06	0.0365821	0.359172	0.342	0.173	6.25937e-08	0.00186122	-0.239672	0.159	0.278	1.19296e-06	0.0354725	0.187302	0.323	0.163	5.02366e-06	0.149379
Cyp27a1	-0.238862	0.027	0.016	0.472382	1	1.4412	0.049	0.038	0.562197	1	-0.382311	0.038	0.046	0.748249	1	0.485516	0.071	0.002	6.35866e-08	0.00189075	-0.0748025	0.038	0.027	0.347385	1	0.387947	0.074	0.031	0.013883	1
Hsp25-ps1	-0.174527	0.589	0.582	0.518795	1	-0.294669	0.336	0.44	0.0104611	1	-0.179348	0.541	0.731	0.00418432	1	-0.366503	0.446	0.619	6.50324e-08	0.00193374	-0.0886991	0.281	0.34	0.118329	1	-0.142263	0.419	0.551	0.00115367	1
Egr1	-0.271624	0.973	0.995	0.000607255	1	-0.584876	0.836	0.981	1.76347e-07	0.00524367	0.555503	0.987	1	4.07644e-05	1	-0.369309	0.985	0.998	7.04537e-08	0.00209494	-0.713218	0.728	0.967	1.7099e-46	5.08438e-42	1.64556	0.971	0.98	1.20651e-09	3.58756e-05
Ciita	-0.199405	0.068	0.111	0.170598	1	0.412051	0.066	0.053	0.615636	1	-0.972981	0.127	0.12	0.927492	1	-0.932648	0.071	0.228	7.38946e-08	0.00219726	-0.351115	0.068	0.077	0.499002	1	0.724632	0.148	0.146	0.806833	1
Gm27597	0.047897	0.938	0.862	0.568092	1	-0.0626909	0.934	0.928	0.3575	1	-0.227651	0.911	0.87	0.00259514	1	-0.371355	0.933	0.876	7.41896e-08	0.00220603	-0.225106	0.869	0.907	4.4315e-07	0.0131771	-0.244623	0.825	0.908	9.39353e-07	0.0279317
Cfl1	-0.0848999	1	0.995	0.0890863	1	-0.0623222	1	1	0.39693	1	-0.126512	1	1	0.00299903	1	-0.203649	1	0.998	7.46279e-08	0.00221906	-0.0426033	0.994	0.993	0.188169	1	-0.021858	1	0.997	0.321933	1
B3galt4	-1.20475	0.041	0.026	0.457758	1	-0.336615	0.057	0.091	0.270794	1	0.819228	0.064	0.093	0.397638	1	-1.82224	0.041	0.177	7.68632e-08	0.00228553	0.811014	0.049	0.074	0.10069	1	0.992165	0.103	0.048	0.00665846	1
Gm10800	0.0687748	0.219	0.153	0.130902	1	0.0182589	0.123	0.088	0.267269	1	-0.0265849	0.076	0.093	0.634402	1	-0.228142	0.245	0.1	7.81058e-08	0.00232248	0.142568	0.133	0.137	0.884886	1	-0.858025	0.112	0.078	0.131221	1
H2-DMb1	-1.21214	0.301	0.291	0.853939	1	-0.0607191	0.328	0.381	0.218048	1	0.345295	0.439	0.398	0.615752	1	-0.778101	0.383	0.593	8.68187e-08	0.00258155	0.200062	0.54	0.5	0.0927486	1	0.0240356	0.656	0.588	0.0699261	1
Tro	0.590686	0.267	0.116	0.00123468	1	0.487393	0.131	0.097	0.323913	1	0.0945527	0.172	0.157	0.740663	1	0.886333	0.197	0.066	8.72257e-08	0.00259366	1.19042	0.051	0.029	0.0619771	1	0.398425	0.074	0.082	0.718746	1
A730015C16Rik	-0.668362	0.342	0.339	0.703468	1	-0.318038	0.197	0.34	0.00906991	1	0.0416347	0.325	0.259	0.25496	1	-0.751397	0.305	0.487	9.19113e-08	0.00273298	-0.297268	0.158	0.268	2.47892e-05	0.737107	0.394793	0.323	0.306	0.249965	1
Per1	-0.552933	0.466	0.471	0.407323	1	1.23624	0.631	0.305	2.63735e-12	7.84217e-08	-0.37024	0.446	0.657	0.000192081	1	-0.669673	0.413	0.613	9.74035e-08	0.00289629	0.945148	0.503	0.287	1.51758e-14	4.51251e-10	-0.0891607	0.51	0.633	0.000207048	1
Plcxd1	0.314681	0.267	0.206	0.194014	1	0.0919845	0.189	0.242	0.259548	1	0.240185	0.248	0.222	0.677182	1	-0.894684	0.264	0.451	1.00178e-07	0.00297878	-0.323155	0.141	0.191	0.0341057	1	-0.216003	0.215	0.235	0.660408	1
Trim2	0.592323	0.479	0.323	0.00198709	1	-0.0104512	0.213	0.327	0.0204748	1	0.392582	0.325	0.435	0.0604899	1	0.149991	0.587	0.383	1.01601e-07	0.0030211	0.594253	0.229	0.258	0.357069	1	-0.286703	0.376	0.497	0.00522798	1
1110012L19Rik	-0.722713	0.205	0.164	0.472966	1	-0.160914	0.115	0.179	0.0992929	1	-0.420558	0.223	0.296	0.182832	1	-0.672731	0.234	0.423	1.04507e-07	0.0031075	-0.807294	0.099	0.167	0.000920814	1	-0.447431	0.201	0.218	0.502349	1
Cep76	0.155415	0.096	0.032	0.0132055	1	-0.186015	0.057	0.063	0.845949	1	0.664538	0.064	0.065	0.981615	1	1.33828	0.093	0.011	1.06804e-07	0.00317582	-0.553931	0.028	0.052	0.0499934	1	-1.20667	0.055	0.082	0.137001	1
Paqr5	0.906506	0.185	0.069	0.00121517	1	-0.928267	0.074	0.113	0.224594	1	-0.0484696	0.153	0.111	0.381547	1	0.596274	0.182	0.055	1.07384e-07	0.00319306	-0.207373	0.086	0.093	0.703973	1	0.0373731	0.179	0.122	0.0429322	1
Gm11730	-1.01466	0.089	0.116	0.343535	1	-0.802396	0.082	0.097	0.572878	1	0.597298	0.07	0.083	0.723065	1	-1.11103	0.104	0.268	1.09439e-07	0.00325416	0.438564	0.086	0.07	0.289298	1	0.58199	0.115	0.068	0.0347276	1
Apex1	-0.274059	0.171	0.148	0.690926	1	0.00167101	0.131	0.226	0.0343973	1	0.098334	0.204	0.13	0.12884	1	-0.660899	0.201	0.378	1.0955e-07	0.00325748	0.218827	0.131	0.17	0.129469	1	1.06625	0.206	0.136	0.0117575	1
Gm37587	-0.968347	0.205	0.085	0.00250772	1	-1.96052	0.041	0.201	3.74413e-05	1	0.149479	0.159	0.12	0.39399	1	0.736247	0.286	0.128	1.10019e-07	0.00327142	-0.113441	0.084	0.132	0.0102575	1	0.481207	0.208	0.184	0.310624	1
Tubb4a	-0.117944	0.13	0.175	0.262636	1	0.0285642	0.016	0.006	0.31435	1	0.505327	0.217	0.009	9.65876e-07	0.0287203	0.186776	0.145	0.035	1.20104e-07	0.0035713	-0.022095	0	0.005	0.0973203	1	0.0984677	0.036	0	0.00103961	1
Ftl1	-0.14582	1	1	0.0014481	1	-0.0901907	1	1	0.1431	1	-0.0419563	1	1	0.126219	1	-0.207199	1	1	1.20476e-07	0.00358236	-0.07998	0.998	0.99	0.00516563	1	-0.0806235	1	1	0.0111095	1
Ift140	-0.121635	0.075	0.037	0.123167	1	-1.17925	0.049	0.079	0.260152	1	0.43526	0.108	0.046	0.0639205	1	-0.736668	0.074	0.23	1.23439e-07	0.00367047	-0.194033	0.045	0.076	0.0385763	1	0.123769	0.124	0.068	0.015605	1
Cux2	-0.0446319	0.24	0.122	0.00683367	1	-0.556024	0.057	0.101	0.144725	1	0.444219	0.096	0.185	0.0377315	1	0.238189	0.297	0.133	1.23973e-07	0.00368635	0.115034	0.045	0.057	0.397066	1	-0.224292	0.072	0.187	4.89775e-06	0.145635
A430033K04Rik	1.57039	0.199	0.069	0.000487523	1	-0.519129	0.074	0.06	0.648924	1	-0.734681	0.064	0.093	0.359103	1	0.862109	0.253	0.1	1.24694e-07	0.00370778	0.157124	0.09	0.065	0.112215	1	0.948457	0.134	0.133	0.829688	1
Ugt1a7c	0.152795	0.103	0.021	0.00139485	1	0.322001	0.172	0.047	2.24202e-05	0.666664	-0.0985494	0.038	0.093	0.0676339	1	0.282866	0.138	0.033	1.31684e-07	0.00391563	0.48298	0.092	0.04	0.000435665	1	0.00873749	0.036	0.051	0.320177	1
Fth1	-0.100965	0.993	1	0.216855	1	-0.159457	0.984	1	0.0123497	1	-0.08603	0.994	1	0.163378	1	-0.294746	1	1	1.34895e-07	0.00401112	-0.152584	0.981	0.997	8.52801e-05	1	-0.125392	0.998	1	0.000247706	1
Pitrm1	-0.417835	0.363	0.233	0.0264013	1	-0.224112	0.139	0.292	0.000990021	1	0.112259	0.306	0.213	0.066803	1	0.111752	0.446	0.248	1.35673e-07	0.00403424	-0.150357	0.191	0.237	0.097629	1	0.801331	0.366	0.265	0.00495104	1
Lsm10	-0.197746	0.274	0.233	0.499791	1	0.159015	0.213	0.264	0.444952	1	-0.733777	0.306	0.454	0.0104587	1	-0.809776	0.275	0.456	1.36352e-07	0.00405443	-0.325855	0.174	0.241	0.00781872	1	-0.167511	0.309	0.361	0.29011	1
Rab24	-0.0756499	0.486	0.28	0.00142303	1	-0.201614	0.262	0.302	0.35306	1	0.188106	0.529	0.5	0.598003	1	-0.467546	0.442	0.613	1.40219e-07	0.0041694	-0.264083	0.216	0.314	0.000205975	1	-0.421309	0.443	0.534	0.0191335	1
Rpl9	0.0597421	0.986	0.889	0.0810043	1	-0.240087	0.934	0.981	0.000680497	1	-0.25552	0.936	0.972	0.000611671	1	-0.447514	0.963	0.94	1.42442e-07	0.00423551	-0.24825	0.916	0.95	4.27368e-08	0.00127078	-0.151874	0.919	0.976	0.000523483	1
Rpl13a	0.0474571	0.993	0.952	0.237639	1	-0.266957	0.975	0.991	0.000323975	1	-0.127809	0.962	1	0.0148464	1	-0.296851	1	0.989	1.43292e-07	0.00426079	-0.267933	0.964	0.993	2.08762e-09	6.20752e-05	-0.191772	0.978	0.993	8.92405e-05	1
Skida1	0.876298	0.123	0.053	0.0235255	1	-0.766448	0.025	0.066	0.0870846	1	0.457879	0.083	0.12	0.329599	1	0.551442	0.16	0.044	1.46881e-07	0.00436749	0.476993	0.023	0.04	0.105414	1	0.869316	0.093	0.054	0.0613413	1
Parm1	-0.00091063	0.041	0.026	0.459993	1	0.0205727	0.016	0.022	0.728822	1	-0.011112	0.019	0.028	0.63722	1	-1.23682	0.022	0.142	1.49805e-07	0.00445444	-0.0509872	0.002	0.019	0.00594639	1	-0.0509368	0.01	0.034	0.0210306	1
0610011F06Rik	0.267781	0.137	0.116	0.576383	1	0.296203	0.148	0.145	0.951534	1	-0.66642	0.178	0.259	0.0941334	1	-0.656216	0.178	0.354	1.55401e-07	0.00462086	-0.29188	0.148	0.204	0.0117242	1	-0.425596	0.203	0.187	0.644187	1
Klhl31	0.0488903	0.26	0.185	0.1824	1	-0.0596511	0.107	0.138	0.411244	1	0.0209213	0.121	0.148	0.624635	1	0.26664	0.249	0.102	1.61576e-07	0.00480447	-0.0838305	0.086	0.113	0.127357	1	-0.0995032	0.081	0.143	0.0095506	1
RP23-53G23.1	0.117257	0.082	0	6.19513e-05	1	-0.00391176	0	0.003	0.539006	1						0.112041	0.059	0	1.6166e-07	0.00480697	0.00139892	0.002	0.002	0.950374	1	-0.00531274	0	0.003	0.234232	1
Dxo	0.179148	0.377	0.243	0.0143676	1	0.479296	0.336	0.302	0.333564	1	0.354598	0.318	0.38	0.511239	1	0.0918722	0.342	0.52	1.65539e-07	0.0049223	0.128236	0.317	0.311	0.599855	1	0.0201893	0.414	0.398	0.899391	1
Gm17035	-0.0118107	0.767	0.487	0.000624598	1	-0.292332	0.525	0.563	0.29723	1	1.28942	0.707	0.519	3.53982e-05	1	0.43308	0.881	0.741	1.68376e-07	0.00500667	0.412787	0.76	0.684	3.5153e-07	0.0104527	0.0100657	0.742	0.776	0.180235	1
Mir124-2hg	0.233765	0.356	0.18	0.000503676	1	-0.02244	0.148	0.179	0.493602	1	-0.149399	0.121	0.222	0.0287794	1	0.260236	0.353	0.177	1.68654e-07	0.00501493	-0.0962175	0.128	0.182	0.0135292	1	-0.00275577	0.196	0.207	0.788387	1
Nol12	-0.0413758	0.24	0.196	0.339234	1	0.188127	0.156	0.217	0.232454	1	-0.358452	0.166	0.13	0.440552	1	-0.669487	0.219	0.389	1.73856e-07	0.00516962	0.388694	0.186	0.187	0.875571	1	0.491193	0.225	0.184	0.0920478	1
BC022687	0.0189231	0.055	0.026	0.184273	1	-1.7628	0.057	0.085	0.313685	1	1.09836	0.045	0.028	0.454143	1	-0.138485	0.097	0.013	1.83424e-07	0.00545412	-0.571987	0.049	0.079	0.0405436	1	-0.25402	0.014	0.054	0.00259878	1
Papolg	0.364633	0.267	0.164	0.0296428	1	-0.0130289	0.238	0.242	0.869627	1	0.0930455	0.217	0.333	0.0547154	1	0.463076	0.331	0.159	1.84938e-07	0.00549912	-0.0979007	0.167	0.223	0.0279106	1	-0.37059	0.196	0.265	0.033783	1
Nufip1	0.0904882	0.199	0.148	0.259362	1	-0.174414	0.098	0.201	0.0161705	1	0.133	0.204	0.167	0.601591	1	-0.438795	0.197	0.376	1.87981e-07	0.00558962	-0.282155	0.09	0.144	0.00783159	1	0.119719	0.163	0.173	0.82623	1
Slc43a3	0.264093	0.993	0.984	0.000402964	1	0.489806	0.984	0.991	3.58331e-08	0.0010655	-0.424569	0.994	1	1.05468e-06	0.031361	0.300559	1	0.98	1.88506e-07	0.00560523	0.249836	0.991	0.983	0.000186288	1	-0.217584	0.998	1	3.69565e-05	1
Clic5	0.00463321	0.918	0.873	0.257111	1	-0.105959	0.779	0.796	0.461114	1	0.153293	0.898	0.935	0.509249	1	0.507375	0.907	0.887	2.03431e-07	0.00604902	0.0916147	0.63	0.691	0.297763	1	-0.158812	0.868	0.912	0.040073	1
Gnb5	0.385665	0.253	0.106	0.000671198	1	-0.179663	0.09	0.179	0.0176021	1	0.0259023	0.166	0.185	0.687974	1	0.762439	0.26	0.111	2.04378e-07	0.00607719	0.361309	0.133	0.131	0.878561	1	0.102011	0.163	0.146	0.571822	1
Pagr1a.1	0.00478108	0.425	0.291	0.0159248	1	-0.08066	0.402	0.491	0.0907462	1	0.178872	0.516	0.435	0.384931	1	-0.687152	0.368	0.553	2.15494e-07	0.00640771	0.0750288	0.411	0.431	0.730025	1	0.12303	0.469	0.432	0.174021	1
Rab3a	-0.0381658	0.397	0.275	0.0512601	1	0.126086	0.295	0.302	0.811758	1	-0.598393	0.35	0.472	0.0146147	1	-0.98398	0.316	0.476	2.25861e-07	0.00671597	-0.388923	0.199	0.256	0.0219653	1	-0.0484719	0.342	0.395	0.161283	1
Gm9774	0.107431	0.199	0.111	0.0322859	1	-0.0847584	0.09	0.107	0.592007	1	-0.0288822	0.096	0.12	0.521865	1	0.227507	0.208	0.077	2.34602e-07	0.00697588	-0.0406587	0.062	0.082	0.188341	1	-0.0127962	0.098	0.102	0.835632	1
Mrpl38	-0.219123	0.404	0.307	0.166535	1	0.285408	0.393	0.39	0.737929	1	-0.133819	0.401	0.398	0.97869	1	-0.952932	0.379	0.542	2.36558e-07	0.00703406	0.260209	0.311	0.352	0.404483	1	-0.0483991	0.385	0.337	0.19029	1
Larp1	-0.114954	0.103	0.09	0.679003	1	-0.535562	0.074	0.142	0.0459946	1	1.52397	0.172	0.102	0.0889817	1	-1.65673	0.093	0.243	2.47747e-07	0.00736675	0.10263	0.094	0.089	0.772805	1	0.20272	0.151	0.119	0.281477	1
Pddc1	0.756959	0.212	0.138	0.0723365	1	0.280222	0.295	0.201	0.0262564	1	-0.191908	0.255	0.315	0.347543	1	-0.584631	0.249	0.429	2.66172e-07	0.00791461	0.431921	0.159	0.174	0.593114	1	-0.105401	0.292	0.286	0.819212	1
Rnf126	-0.995994	0.158	0.132	0.710896	1	-0.621017	0.123	0.157	0.332289	1	0.707451	0.146	0.13	0.644423	1	-0.136701	0.186	0.372	2.673e-07	0.00794818	-0.302833	0.096	0.155	0.00379607	1	-0.0171865	0.167	0.17	0.884259	1
Fgfrl1	-0.0530881	0.014	0.026	0.417685	1	-1.05565	0.033	0.016	0.272142	1	0.0869137	0.038	0	0.0405821	1	-1.90297	0	0.093	2.67882e-07	0.00796548	0.580841	0.032	0.029	0.796531	1	-0.568559	0.012	0.031	0.0791271	1
Glis1	-0.00554711	0.014	0.011	0.801851	1	1.08247	0.008	0.016	0.551061	1	0.00696773	0.025	0.019	0.720606	1	-0.942301	0.026	0.146	2.72729e-07	0.0081096	-0.53211	0.009	0.022	0.0887693	1	-0.629781	0.012	0.058	0.00051291	1
Nrep	-0.891409	0.527	0.519	0.245799	1	-1.46201	0.287	0.679	3.7891e-13	1.12669e-08	0.369648	0.637	0.574	0.0340743	1	-0.865491	0.639	0.79	2.83271e-07	0.00842307	-1.1696	0.386	0.679	5.07921e-23	1.5103e-18	0.263232	0.711	0.626	0.000768327	1
H2-Q6	-1.75432	0.699	0.667	0.0118977	1	0.0287954	0.836	0.805	0.440273	1	0.50649	0.892	0.731	0.000949218	1	-0.421683	0.777	0.869	2.85507e-07	0.00848954	0.0126122	0.906	0.905	0.717915	1	0.60983	0.983	0.861	5.91846e-14	1.75985e-09
Eif1a	-0.737532	0.438	0.503	0.102405	1	-0.392138	0.287	0.403	0.0337191	1	0.768112	0.51	0.444	0.0995156	1	-0.503164	0.446	0.624	2.86945e-07	0.0085323	-0.615475	0.193	0.34	7.45285e-08	0.0022161	0.334651	0.517	0.432	0.00580861	1
Gprc5c	0.704446	0.295	0.233	0.161365	1	-0.143617	0.197	0.286	0.0592259	1	-0.046872	0.21	0.259	0.368579	1	0.208892	0.323	0.155	2.94449e-07	0.00875543	0.103085	0.137	0.211	0.000391734	1	-0.108374	0.151	0.204	0.0714511	1
Pagr1a	0.00478108	0.425	0.291	0.0159248	1	-0.0801375	0.402	0.487	0.102306	1	0.178872	0.516	0.435	0.384931	1	-0.685995	0.368	0.551	2.98704e-07	0.00888198	0.0745784	0.405	0.431	0.613951	1	0.120947	0.469	0.432	0.175048	1
Ptpn4	1.58546	0.13	0.026	0.0002781	1	-1.3915	0.008	0.053	0.032538	1	-1.1488	0.057	0.083	0.372446	1	0.204714	0.119	0.024	3.24836e-07	0.00965899	-0.0786608	0.032	0.046	0.217854	1	0.162169	0.053	0.054	0.890803	1
Edrf1	0.202118	0.103	0.095	0.839591	1	-0.163222	0.082	0.05	0.212389	1	0.383657	0.083	0.111	0.518985	1	-1.03554	0.115	0.274	3.4281e-07	0.0101935	-0.619094	0.028	0.088	3.39172e-05	1	0.225514	0.163	0.126	0.1649	1
Nanos1	-0.344942	0.301	0.153	0.00248503	1	-0.109347	0.156	0.248	0.0438178	1	0.634707	0.185	0.074	0.0119594	1	-0.977607	0.286	0.128	3.47214e-07	0.0103244	-0.371326	0.09	0.259	6.43791e-14	1.91431e-09	-0.0520477	0.153	0.109	0.0763957	1
Smyd3	-0.676928	0.103	0.196	0.0182544	1	-1.56365	0.057	0.154	0.00589023	1	0.322039	0.153	0.167	0.836356	1	-1.06869	0.086	0.235	3.60365e-07	0.0107154	-0.599551	0.073	0.155	2.18618e-05	0.65006	0.987147	0.225	0.133	0.00176693	1
Mapkapk5.1	-0.955837	0.137	0.143	0.768101	1	-0.0167823	0.115	0.164	0.179553	1	-0.567136	0.159	0.241	0.110863	1	-1.16095	0.156	0.327	3.63676e-07	0.0108139	-0.179249	0.094	0.162	0.000781986	1	-0.58792	0.122	0.204	0.00262486	1
Rpl4	-0.185608	1	0.995	0.0824503	1	-0.159844	0.975	0.994	0.0150305	1	0.0200374	0.994	0.991	0.740555	1	-0.34681	0.996	1	3.69085e-07	0.0109747	-0.232756	0.983	0.998	1.5049e-07	0.00447483	0.130124	0.988	0.99	0.00417385	1
Pik3cd	-0.068012	0.171	0.111	0.165401	1	0.283045	0.066	0.138	0.0478599	1	-0.00494242	0.108	0.148	0.351683	1	-1.94318	0.056	0.188	3.78033e-07	0.0112408	0.694438	0.049	0.031	0.127862	1	-0.511103	0.05	0.058	0.657266	1
Fam193b	-0.677939	0.144	0.164	0.512843	1	-1.17083	0.139	0.151	0.618016	1	-0.0600271	0.248	0.269	0.747496	1	-0.457031	0.186	0.374	3.79567e-07	0.0112864	0.339109	0.137	0.162	0.367554	1	-0.186452	0.256	0.235	0.635453	1
Hcrtr1	0.0266689	0.014	0	0.108012	1	0.33218	0.033	0.016	0.263295	1	0.00903211	0.006	0	0.411238	1	0.506126	0.063	0.002	3.79915e-07	0.0112968	0.808501	0.045	0.017	0.006767	1	0.707756	0.043	0.048	0.829007	1
P2ry6	0.0748218	0.048	0.005	0.0116385	1	0.01618	0.025	0.003	0.0349389	1	0.0154326	0.013	0	0.242113	1	0.186454	0.063	0.002	3.85424e-07	0.0114606	0.203399	0.006	0.009	0.559264	1	0.653447	0.017	0.014	0.738777	1
Adgrf5	0.262032	1	0.989	0.00345162	1	0.199326	0.984	0.997	0.00593117	1	-0.246929	0.994	1	0.000552514	1	0.293396	1	0.998	3.97015e-07	0.0118052	0.155231	0.979	0.978	0.0338456	1	-0.059743	0.988	0.993	0.0208586	1
Gm37222	0.0598852	0.048	0.005	0.0114969	1	-0.0103853	0	0.006	0.382468	1	0.0197331	0.013	0	0.242113	1	0.0987067	0.056	0	4.00294e-07	0.0119027	0.00475438	0.006	0.003	0.583834	1	-0.00423586	0.01	0.007	0.698884	1
Cplx2	0.818475	0.199	0.106	0.0203778	1	-0.221716	0.066	0.11	0.174959	1	-0.95406	0.14	0.204	0.0979499	1	0.0340381	0.197	0.069	4.00858e-07	0.0119195	-0.461013	0.019	0.06	0.000491419	1	0.00507992	0.124	0.19	0.0166102	1
Nap1l3	-0.21772	0.096	0.053	0.150889	1	-0.471275	0.025	0.053	0.192201	1	0.804322	0.07	0.083	0.701826	1	0.817213	0.082	0.009	4.32151e-07	0.01285	-0.525231	0.041	0.053	0.346558	1	-0.160082	0.093	0.102	0.659824	1
Eed	0.0463912	0.267	0.212	0.248392	1	-0.0456643	0.221	0.239	0.648034	1	0.359405	0.293	0.315	0.81191	1	-0.664095	0.309	0.482	4.63443e-07	0.0137805	-0.530791	0.15	0.244	0.000195819	1	-0.21858	0.239	0.299	0.0703251	1
Pfdn6	-0.330057	0.418	0.344	0.421737	1	0.141169	0.361	0.349	0.869431	1	-0.312841	0.369	0.509	0.0398414	1	-0.846475	0.346	0.515	4.72743e-07	0.014057	-0.223483	0.218	0.326	0.000293823	1	-0.180233	0.455	0.412	0.271929	1
Dapk1	1.11639	0.253	0.095	0.000158248	1	-0.637872	0.074	0.116	0.19107	1	-0.263592	0.134	0.12	0.816858	1	0.635539	0.201	0.071	4.76507e-07	0.0141689	-0.245234	0.011	0.041	0.00184419	1	0.823631	0.074	0.058	0.365431	1
Zfp72	0.577066	0.055	0.026	0.182035	1	-0.996883	0.008	0.022	0.328539	1	-1.16697	0.013	0.046	0.0919567	1	0.31612	0.082	0.009	4.84194e-07	0.0143975	0.00809819	0.024	0.021	0.669203	1	-0.469505	0.062	0.031	0.0596549	1
Klhl15	-0.104841	0.137	0.063	0.032314	1	0.557493	0.049	0.047	0.92504	1	-0.417488	0.045	0.065	0.486182	1	0.728086	0.156	0.046	5.09235e-07	0.0151421	-0.809585	0.021	0.04	0.0671744	1	-0.201016	0.069	0.044	0.161442	1
Pop7	-0.0283993	0.363	0.18	0.000617617	1	0.372495	0.262	0.233	0.491934	1	-0.122294	0.306	0.296	0.804131	1	-0.82202	0.23	0.412	5.56668e-07	0.0165525	-0.182841	0.193	0.184	0.809865	1	0.124898	0.33	0.276	0.0811803	1
Fchsd1	0.612889	0.089	0.005	0.000147737	1	-1.08716	0.025	0.066	0.0882696	1	-0.360832	0.045	0.074	0.292405	1	0.930386	0.115	0.024	5.60128e-07	0.0166554	0.237367	0.047	0.057	0.474102	1	-1.74647	0.074	0.065	0.67677	1
Nbl1	-0.041239	0.027	0.042	0.459134	1	0.975006	0.049	0.016	0.0405149	1	-0.042542	0.013	0.056	0.0491501	1	-0.80606	0.074	0.217	5.67585e-07	0.0168771	1.89431	0.045	0.012	0.000834219	1	0.45931	0.019	0.071	0.000507323	1
Rps18	0.026176	0.966	0.878	0.35724	1	-0.169483	0.893	0.975	0.0234036	1	-0.314383	0.955	0.963	0.000731823	1	-0.372162	0.952	0.954	5.76526e-07	0.017143	-0.390075	0.897	0.947	2.25373e-12	6.70147e-08	-0.326026	0.947	0.969	1.84198e-08	0.000547712
Etv5	0.33698	0.219	0.085	0.000946368	1	0.583254	0.148	0.104	0.192746	1	-0.0904963	0.166	0.278	0.0368316	1	1.96099	0.208	0.082	6.18811e-07	0.0184004	0.389646	0.096	0.074	0.186302	1	0.323403	0.189	0.16	0.313956	1
Cyp4a10	-1.2294	0.103	0.053	0.117445	1	0.713042	0.09	0.079	0.654484	1	-0.0549703	0.019	0.083	0.0145809	1	0.601944	0.086	0.011	6.28826e-07	0.0186981	0.934164	0.056	0.031	0.0332474	1	-0.0857488	0.019	0.02	0.896544	1
Gm26852	0.0357274	0.493	0.64	0.00175452	1	0.0675579	0.443	0.484	0.478085	1	-0.102718	0.49	0.519	0.75447	1	-0.465616	0.428	0.588	6.3104e-07	0.018764	0.112028	0.402	0.502	0.00400286	1	-0.0101922	0.555	0.459	0.00514933	1
Spin4	0.870532	0.226	0.079	0.000260765	1	0.871618	0.066	0.041	0.268078	1	-0.504535	0.115	0.102	0.754262	1	1.10579	0.26	0.117	6.73714e-07	0.0200329	0.03448	0.021	0.045	0.0274318	1	0.530605	0.11	0.092	0.391286	1
Map4	-0.102619	0.945	0.783	0.00260399	1	0.164319	0.852	0.89	0.231806	1	0.0788838	0.917	0.889	0.966809	1	0.431799	0.922	0.863	6.85991e-07	0.0203979	0.185733	0.807	0.864	0.804011	1	-0.186877	0.88	0.912	0.0226461	1
Lgr5	0.195389	0.39	0.222	0.00151799	1	-0.499426	0.123	0.311	1.28108e-05	0.380929	0.471784	0.439	0.315	0.00410523	1	-0.685984	0.413	0.586	6.87703e-07	0.0204488	-2.13328	0.118	0.325	5.21943e-17	1.552e-12	0.356413	0.502	0.347	7.93027e-07	0.0235807
Gm38194	-0.251118	0.171	0.138	0.406572	1	-0.229721	0.057	0.104	0.124793	1	-0.139754	0.115	0.176	0.166598	1	0.812349	0.238	0.102	7.02111e-07	0.0208773	-0.543403	0.081	0.1	0.240986	1	-0.321284	0.086	0.136	0.0254361	1
Rpl18	-0.0892549	0.973	0.899	0.673337	1	-0.0541348	0.943	0.975	0.384439	1	-0.344972	0.917	0.963	0.000370282	1	-0.418831	0.967	0.912	7.11453e-07	0.021155	-0.201387	0.904	0.93	0.000172181	1	-0.188853	0.892	0.908	0.00686589	1
Orc2	0.0351199	0.233	0.159	0.139736	1	-1.02405	0.172	0.242	0.0982085	1	0.0193127	0.185	0.176	0.833578	1	0.409421	0.297	0.142	7.30371e-07	0.0217176	-0.137712	0.099	0.155	0.00672102	1	-0.0150392	0.261	0.265	0.880474	1
Polr3d	-1.87087	0.171	0.185	0.618613	1	-0.959777	0.074	0.179	0.00602752	1	0.574225	0.229	0.176	0.254635	1	-1.039	0.134	0.29	7.30925e-07	0.021734	-1.00234	0.049	0.148	3.65359e-08	0.0010864	0.0488605	0.22	0.122	0.00147321	1
Timp3	0.184419	1	1	0.00523196	1	0.223286	1	1	0.000310192	1	-0.255187	1	1	1.34492e-05	0.399913	0.224733	1	1	7.89935e-07	0.0234887	0.00256741	0.998	1	0.791419	1	-0.16332	1	1	9.8579e-05	1
Pvr	-1.10369	0.233	0.249	0.502695	1	-0.996991	0.23	0.305	0.0582132	1	0.871758	0.35	0.213	0.0225174	1	-0.918932	0.305	0.478	7.99306e-07	0.0237674	-0.186938	0.131	0.241	8.33131e-06	0.247731	0.746311	0.352	0.214	0.000178986	1
B3galnt1	0.208885	0.164	0.042	0.000182373	1	-0.674105	0.074	0.082	0.752737	1	0.0832059	0.108	0.065	0.206562	1	1.45795	0.219	0.088	8.05124e-07	0.0239404	-0.226452	0.054	0.089	0.0270463	1	0.269109	0.191	0.102	0.0015212	1
Pax8	0.106446	0.062	0.026	0.115628	1	0.0561256	0.049	0.016	0.0446217	1	-0.010133	0.045	0.046	0.947657	1	0.207535	0.078	0.009	8.06743e-07	0.0239885	-0.0915861	0.039	0.031	0.439517	1	0.00749224	0.024	0.034	0.435223	1
Ispd	-0.179805	0.192	0.074	0.00187217	1	-1.25006	0.033	0.079	0.0798571	1	0.789431	0.115	0.111	0.935013	1	-1.01327	0.112	0.259	8.18983e-07	0.0243524	0.100545	0.024	0.048	0.0383235	1	-0.273469	0.098	0.088	0.719528	1
C130023A14Rik	0.207352	0.144	0.032	0.000183714	1	0.875728	0.057	0.057	0.974188	1	0.0222664	0.051	0.028	0.369841	1	1.83002	0.156	0.049	8.20704e-07	0.0244036	0.164137	0.049	0.06	0.448306	1	0.235951	0.077	0.075	0.931577	1
Ttc39c	0.0312033	0.151	0.069	0.0196664	1	2.27527	0.238	0.047	1.25475e-09	3.731e-05	-2.15031	0.057	0.231	2.09785e-05	0.623795	0.959082	0.245	0.108	8.26866e-07	0.0245869	0.556295	0.096	0.046	0.00130297	1	-1.15455	0.103	0.245	5.16166e-07	0.0153482
Adgrl4	0.2745	0.993	0.989	0.0010877	1	0.0456564	0.984	0.994	0.873902	1	0.110308	1	1	0.654337	1	0.219982	1	1	8.44046e-07	0.0250977	0.10045	0.998	0.995	0.00969277	1	0.00196057	1	1	0.806897	1
Rrp15	0.417399	0.164	0.153	0.906615	1	-0.767644	0.107	0.239	0.00287417	1	-0.487734	0.223	0.222	0.927716	1	-0.620462	0.204	0.365	8.55606e-07	0.0254415	-0.625274	0.075	0.21	3.85222e-10	1.14546e-05	1.11797	0.275	0.177	0.00104849	1
Kap	-0.0620843	0.021	0.058	0.0958593	1	-0.537072	0.025	0.063	0.11369	1	0.252003	0.025	0	0.0960372	1	-1.55004	0.022	0.131	8.65498e-07	0.0257356	-1.11419	0.023	0.072	9.39349e-05	1	1.08007	0.014	0	0.0393645	1
Eif4g2	-0.0562132	0.986	0.952	0.640486	1	0.0658653	0.926	0.969	0.37896	1	0.188358	0.975	0.991	0.699672	1	0.251678	0.989	0.956	8.6796e-07	0.0258088	0.162432	0.901	0.911	0.0523155	1	0.0205296	0.952	0.99	0.395597	1
Ift22	0.897944	0.178	0.074	0.00392926	1	0.437985	0.205	0.167	0.382591	1	0.814543	0.178	0.13	0.336582	1	0.719714	0.223	0.091	8.68183e-07	0.0258154	0.0169318	0.103	0.12	0.385428	1	0.199028	0.215	0.177	0.193012	1
5031434O11Rik	0.125448	0.021	0.016	0.734439	1	1.07724	0.016	0.016	0.958396	1	-0.150741	0.019	0.056	0.111112	1	-0.14694	0.011	0.111	8.7784e-07	0.0261026	-0.0111001	0.023	0.033	0.31218	1	-1.51607	0.012	0.071	2.96621e-05	0.882003
Orai1	0.589711	0.452	0.249	0.000323119	1	-0.60699	0.27	0.421	0.00448463	1	-0.948316	0.306	0.463	0.00147829	1	-0.395927	0.424	0.573	8.87934e-07	0.0264027	-0.372349	0.137	0.271	7.22698e-08	0.00214894	0.199771	0.344	0.412	0.284185	1
Rps6	-0.0745931	0.979	0.862	0.828368	1	-0.293805	0.902	0.962	0.000217833	1	-0.177314	0.924	0.954	0.00310841	1	-0.412765	0.963	0.947	8.95452e-07	0.0266263	-0.26526	0.874	0.931	4.70124e-07	0.0139792	-0.166232	0.916	0.969	0.00100076	1
2210016F16Rik	-0.666386	0.411	0.328	0.460231	1	-0.273926	0.197	0.384	0.000294907	1	-0.275506	0.331	0.398	0.182596	1	-0.478449	0.409	0.558	8.9987e-07	0.0267576	0.213198	0.223	0.261	0.226772	1	0.149255	0.359	0.32	0.206807	1
Shmt1	0.113689	0.055	0.101	0.16036	1	0.0331985	0.066	0.113	0.134405	1	0.166863	0.051	0.083	0.31987	1	-0.454749	0.056	0.186	9.22217e-07	0.0274221	-0.125663	0.068	0.105	0.0282173	1	-0.20961	0.067	0.095	0.163268	1
Gm29325	0.08011	0.89	0.783	0.222132	1	-0.0818656	0.672	0.764	0.191824	1	-0.0823279	0.586	0.685	0.148452	1	0.235601	0.892	0.774	9.31345e-07	0.0276935	-0.164516	0.629	0.723	0.00301734	1	-0.10622	0.632	0.714	0.0449732	1
Col9a3	-0.670119	0.027	0.021	0.722675	1	-0.764776	0	0.006	0.382468	1	0.0399241	0.038	0.009	0.151948	1	1.11867	0.059	0.002	9.47105e-07	0.0281622	-0.773956	0.002	0.01	0.0754015	1	0.00457704	0.002	0	0.403264	1
Arsg	1.15223	0.075	0.016	0.0071658	1	-2.08643	0.025	0.079	0.0380433	1	-0.247031	0.057	0.056	0.978879	1	0.998469	0.078	0.009	9.64561e-07	0.0286812	0.447804	0.039	0.036	0.740612	1	0.663994	0.048	0.034	0.342667	1
Csnk1e	-0.235967	0.336	0.28	0.36509	1	-0.135932	0.197	0.286	0.0695276	1	-0.220148	0.357	0.444	0.127704	1	-0.586039	0.294	0.465	9.64631e-07	0.0286833	0.329156	0.216	0.227	0.675993	1	-0.177339	0.299	0.323	0.622803	1
Gfer	0.396753	0.171	0.101	0.0613036	1	0.231431	0.172	0.236	0.188346	1	-0.0789923	0.217	0.139	0.168225	1	-0.608102	0.208	0.378	9.90909e-07	0.0294647	-0.339091	0.135	0.187	0.0249902	1	-0.109126	0.191	0.17	0.468545	1
Ino80d	0.642301	0.384	0.19	0.000185678	1	0.370617	0.295	0.302	0.875613	1	-0.672982	0.261	0.315	0.20277	1	0.286959	0.45	0.257	9.91399e-07	0.0294792	0.271967	0.22	0.204	0.572045	1	-0.0346544	0.304	0.33	0.440045	1
Pkd2l2	-0.235837	0.192	0.074	0.00255418	1	-0.142916	0.066	0.066	0.988348	1	0.179124	0.089	0.046	0.189219	1	0.92052	0.197	0.073	9.96384e-07	0.0296275	-0.0954976	0.039	0.045	0.673651	1	0.0376898	0.05	0.075	0.178058	1
Ric1	-0.638241	0.349	0.296	0.657985	1	-1.13442	0.172	0.321	0.00149367	1	-0.478199	0.331	0.509	0.00168855	1	-0.0866579	0.48	0.288	1.01319e-06	0.0301272	-1.08076	0.109	0.244	2.94856e-09	8.76753e-05	-0.442317	0.361	0.435	0.014828	1
Gm16675	-0.324909	0.021	0.011	0.467935	1	0.0507584	0.025	0.035	0.604581	1	0.0908031	0.013	0.028	0.390775	1	0.476098	0.059	0.002	1.02463e-06	0.0304674	-0.310995	0.002	0.014	0.0271223	1	-0.262721	0.017	0.017	0.964256	1
Sod1	-0.0220582	0.959	0.947	0.700992	1	-0.134055	0.984	0.978	0.347175	1	-0.505583	0.994	1	5.06604e-10	1.50639e-05	-0.463775	0.97	0.934	1.04036e-06	0.0309352	-0.298376	0.919	0.94	0.000742915	1	-0.381815	0.955	0.99	5.52726e-13	1.64353e-08
Gfod1	-0.718199	0.068	0.063	0.889368	1	0.659678	0.025	0.038	0.49104	1	1.0864	0.083	0.037	0.130715	1	-1.77242	0.052	0.175	1.04124e-06	0.0309612	-0.375864	0.019	0.043	0.0221437	1	0.0940306	0.045	0.051	0.750869	1
Thap7	0.187158	0.445	0.333	0.0902832	1	0.111544	0.295	0.336	0.463448	1	0.0442134	0.389	0.5	0.108018	1	-0.594331	0.353	0.54	1.05455e-06	0.031357	0.0814071	0.313	0.292	0.424386	1	0.119015	0.414	0.361	0.144037	1
Sult2b1	-0.0213981	0	0.016	0.12766	1	-0.0310924	0.008	0.009	0.906725	1	0.0677792	0.045	0.009	0.0970906	1	-1.34153	0.007	0.102	1.0562e-06	0.0314061	0.136115	0.008	0.019	0.100759	1	0.360494	0.031	0.027	0.778753	1
Cox10	-0.575756	0.274	0.196	0.234915	1	0.596433	0.172	0.214	0.438922	1	0.242751	0.204	0.167	0.567122	1	-0.921649	0.212	0.378	1.09558e-06	0.0325771	-0.647861	0.137	0.232	5.48077e-05	1	0.151928	0.237	0.224	0.682381	1
Tmem177	-0.943682	0.041	0.069	0.277666	1	0.988351	0.057	0.066	0.763517	1	-0.915332	0.076	0.12	0.216778	1	-0.186126	0.1	0.25	1.09573e-06	0.0325817	0.536702	0.101	0.064	0.018471	1	0.20243	0.139	0.095	0.084501	1
Pdlim1	-0.111354	0.274	0.159	0.0222956	1	0.444037	0.213	0.274	0.432574	1	-0.394849	0.204	0.269	0.191885	1	-0.760294	0.167	0.316	1.18127e-06	0.0351251	-0.583891	0.038	0.137	9.74333e-09	0.000289718	0.374929	0.105	0.099	0.732879	1
Tmsb4x	0.295686	1	0.995	0.00612154	1	0.0583709	0.975	0.991	0.847255	1	-0.67588	0.994	1	2.87556e-12	8.55047e-08	-0.271155	1	1	1.18591e-06	0.035263	-0.180257	0.996	0.997	0.000161274	1	-0.293967	1	1	5.9425e-17	1.767e-12
Gm1821	-0.122918	0.575	0.646	0.168083	1	-0.290833	0.459	0.619	0.00315137	1	-0.0951662	0.605	0.667	0.293517	1	0.200373	0.517	0.341	1.20141e-06	0.035724	-0.171481	0.362	0.448	0.00135567	1	-0.161464	0.45	0.595	0.000956308	1
Gm37352	-0.766548	0.178	0.164	0.81518	1	0.637662	0.197	0.16	0.357667	1	-1.85485	0.172	0.361	0.000224663	1	-0.77516	0.115	0.261	1.20742e-06	0.0359025	0.184294	0.154	0.153	0.925007	1	-0.19167	0.196	0.241	0.145087	1
Serping1	-1.55913	0.137	0.27	0.00163254	1	-0.966372	0.082	0.255	5.47877e-05	1	-0.350311	0.178	0.157	0.75715	1	0.168211	0.108	0.257	1.23871e-06	0.0368332	-1.04015	0.069	0.156	5.21673e-06	0.15512	0.671049	0.115	0.153	0.213483	1
Art3	-0.427656	0.233	0.275	0.346317	1	-0.626059	0.115	0.289	0.000164693	1	-0.334696	0.344	0.25	0.111866	1	-0.519963	0.312	0.491	1.31254e-06	0.0390282	-0.647921	0.159	0.299	4.40724e-08	0.00131049	0.0289243	0.502	0.422	0.0496445	1
Elk3	0.186135	0.993	0.947	0.0153096	1	-0.0368149	0.967	0.978	0.263723	1	0.199534	0.955	0.954	0.0809174	1	0.316508	0.989	0.949	1.33157e-06	0.0395942	0.258151	0.942	0.945	0.000189656	1	-0.0433328	0.976	0.98	0.191747	1
Chchd6	0.177517	0.137	0.09	0.199611	1	-0.401285	0.115	0.148	0.381704	1	0.510587	0.089	0.139	0.230948	1	-1.17351	0.123	0.277	1.34108e-06	0.039877	-0.784986	0.103	0.151	0.0197573	1	-0.385485	0.124	0.129	0.86587	1
AW822252	0.0223894	0.103	0.058	0.151767	1	-0.0553493	0.057	0.085	0.326003	1	-0.102749	0.038	0.102	0.0366803	1	0.15551	0.119	0.029	1.38617e-06	0.0412179	-0.0321107	0.026	0.045	0.0986952	1	-0.0907937	0.022	0.065	0.0035012	1
Tap1	-0.658131	0.596	0.683	0.0823266	1	0.39317	0.607	0.667	0.806259	1	0.582127	0.631	0.546	0.0476566	1	-0.6587	0.647	0.774	1.38702e-06	0.0412432	-0.0108142	0.597	0.655	0.135142	1	0.319261	0.751	0.578	0.000244471	1
Gba	0.277424	0.5	0.439	0.131472	1	-0.17561	0.533	0.531	0.670661	1	0.247524	0.522	0.481	0.457077	1	-0.568746	0.491	0.635	1.41125e-06	0.0419635	0.284273	0.443	0.44	0.753194	1	0.169443	0.572	0.49	0.114722	1
Gfpt2	0.685551	0.158	0.079	0.0307538	1	0.0897239	0.197	0.113	0.020723	1	0.30972	0.255	0.083	0.000571424	1	-0.768861	0.186	0.336	1.46802e-06	0.0436517	0.355137	0.268	0.16	1.18275e-05	0.35169	0.380604	0.251	0.204	0.105426	1
Gm38058	-0.440729	0.007	0.016	0.451537	1	-0.763792	0	0.006	0.382468	1	-0.291255	0	0.019	0.0885872	1	-0.72077	0	0.082	1.49626e-06	0.0444913	-0.328775	0.002	0.009	0.125229	1	0.455676	0.005	0.007	0.72406	1
Eif3g	-0.179805	0.801	0.683	0.383687	1	0.0473602	0.713	0.777	0.559466	1	0.0837129	0.745	0.824	0.605964	1	-0.608705	0.784	0.825	1.49962e-06	0.0445912	-0.067827	0.679	0.722	0.200238	1	0.0935296	0.763	0.806	0.547209	1
B3galt1	0.678599	0.137	0.026	0.000175658	1	-0.185056	0.008	0.022	0.337575	1	-1.32486	0.045	0.167	0.000789546	1	0.795551	0.082	0.011	1.5024e-06	0.044674	-0.111234	0.011	0.017	0.412617	1	-0.937685	0.033	0.031	0.84151	1
Maz	0.965515	0.171	0.101	0.050397	1	0.638001	0.156	0.135	0.526045	1	1.67127	0.178	0.056	0.00301957	1	-0.546551	0.149	0.301	1.50284e-06	0.0446869	0.360954	0.113	0.108	0.820715	1	0.0632698	0.132	0.143	0.737755	1
Slco4a1	0.868066	0.205	0.19	0.641159	1	1.69855	0.336	0.346	0.888672	1	0.585286	0.274	0.194	0.0878949	1	-1.1296	0.234	0.398	1.52246e-06	0.0452702	0.0904712	0.283	0.325	0.142199	1	1.39561	0.378	0.214	1.08367e-07	0.00322231
RP23-407I6.7	0.203344	0.212	0.079	0.000446275	1	-0.0858655	0.082	0.145	0.0924107	1	-0.0376398	0.07	0.111	0.271038	1	0.182747	0.216	0.086	1.53204e-06	0.0455552	-0.0986132	0.077	0.11	0.0535194	1	0.0264379	0.065	0.054	0.556832	1
Cluh	-0.249087	0.233	0.111	0.00497534	1	-0.273682	0.18	0.192	0.811376	1	-0.09498	0.191	0.185	0.913421	1	-0.82881	0.126	0.274	1.53208e-06	0.0455565	-0.0199414	0.143	0.186	0.0751572	1	0.656468	0.203	0.136	0.01279	1
Slc2a10	-0.160586	0.226	0.079	0.000195879	1	0.24024	0.107	0.126	0.598435	1	0.557513	0.197	0.102	0.0385066	1	0.106377	0.29	0.139	1.57126e-06	0.0467213	-0.301737	0.069	0.103	0.0469376	1	0.56485	0.182	0.075	4.20746e-05	1
Pf4	0.569593	0.082	0	6.19513e-05	1	0.0337279	0.033	0.013	0.153409	1	0.143828	0.013	0.037	0.195494	1	0.371195	0.071	0.007	1.57399e-06	0.0468025	-0.282721	0.013	0.031	0.045766	1	-0.341977	0.05	0.061	0.53472	1
1700060J05Rik	0.183169	0.13	0.095	0.286301	1	0.137517	0.09	0.082	0.757431	1	-0.242477	0.096	0.194	0.0221214	1	0.534172	0.141	0.042	1.69249e-06	0.0503261	0.0677256	0.079	0.052	0.0667809	1	-0.220215	0.069	0.153	0.000406931	1
Sgk1	-0.0187628	1	1	0.779145	1	0.120721	1	1	0.0461918	1	0.307398	1	1	1.26366e-07	0.00375749	0.209078	1	1	1.69613e-06	0.0504343	0.527579	1	1	2.17694e-34	6.47312e-30	0.185718	1	1	0.00163353	1
Gm2895	-0.102429	0.493	0.328	0.0499901	1	-0.302032	0.336	0.333	0.719111	1	1.02797	0.382	0.25	0.00410238	1	0.374368	0.68	0.502	1.69817e-06	0.050495	0.421172	0.589	0.476	3.60647e-06	0.107238	-0.03956	0.5	0.605	0.0230077	1
Rps4x	-0.102401	1	0.926	0.952371	1	-0.216948	0.934	0.994	0.00415282	1	-0.043251	0.924	0.935	0.676803	1	-0.426314	0.974	0.945	1.69905e-06	0.0505212	-0.23434	0.916	0.964	8.59104e-07	0.0255455	-0.0157273	0.945	0.959	0.59344	1
Fam126b	-0.436268	0.315	0.169	0.00504416	1	0.309609	0.115	0.164	0.205769	1	-0.270533	0.229	0.259	0.499927	1	1.34256	0.338	0.177	1.72999e-06	0.0514413	-0.189599	0.073	0.112	0.0297222	1	0.549067	0.189	0.19	0.967846	1
Hid1	-0.268086	0.384	0.217	0.00201863	1	0.564261	0.238	0.324	0.110877	1	-0.872952	0.312	0.398	0.107847	1	-0.017875	0.323	0.5	1.73249e-06	0.0515157	-0.359337	0.253	0.323	0.0188553	1	1.01154	0.392	0.276	0.000229112	1
Ppm1b	0.239653	0.171	0.069	0.00409141	1	-0.275602	0.098	0.075	0.47711	1	0.459333	0.108	0.167	0.207683	1	1.19064	0.16	0.051	1.73369e-06	0.0515512	0.0193323	0.053	0.069	0.269581	1	0.0488925	0.103	0.133	0.205806	1
Atf3	-0.401964	0.89	0.974	0.0011082	1	-0.139274	0.615	0.824	0.000275214	1	0.936994	0.955	0.815	2.85668e-09	8.49434e-05	-0.524105	0.836	0.951	1.75338e-06	0.0521368	-0.151471	0.525	0.785	8.94314e-15	2.65924e-10	1.48945	0.844	0.83	0.000240666	1
[truncated: 27,194 more rows]

## Sheet: 6w_AVR
Genes	OB_percentage_expression	OB_average_expression	Lean_percentage_expression	Lean_average_expression	avg_logFC(OB/Lean)	p_val	p_val_adj
Gm26785	0.104	0.241399	0.841	7.64199	-1.94039	1.30779e-18	3.8887e-14
[truncated: 58 more rows]

## Sheet: 6w_DVR
Genes	OB_percentage_expression	OB_average_expression	Lean_percentage_expression	Lean_average_expression	avg_logFC(OB/Lean)	p_val	p_val_adj
[truncated: 11 more rows]

[truncated: 13 more sheets: 6w_EA, 6w_AA, 6w_VEC, 11w_AVR, 11w_DVR, 11w_EA, 11w_AA, 11w_VEC, 20w_AVR, 20w_DVR, 20w_EA, 20w_AA, 20w_VEC]
