# Supplementary material for: Renal Endothelial Single-Cell Transcriptomics Reveals Spatiotemporal Regulation and Divergent Roles of Differential Gene Transcription and Alternative Splicing in Murine Diabetic Nephropathy
Source: Preprints.org preprint supplement (doi:10.20944/preprints202403.1481.v1), 2024-03-25
Supplement: Supplementary file 3 [file supplementary › IJMS_2920974_Supplementary Material/Supplemental FIle 4_Oxidative phosphorylation.xlsx]

## Sheet: PCEC week 11
Entrez Gene Name	GenBank/Gene Symbol - mouse (Entrez Gene)/miRBase (mature)	Expr Log Ratio	Expr p-value
cytochrome c oxidase copper chaperone COX17	Cox17	-0.642	7.58e-05
cytochrome c oxidase subunit 6A1	Cox6a1	-0.272	0.016
cytochrome c oxidase subunit 7A2	Cox7a2	-0.292	0.00583
cytochrome c oxidase subunit 7B	Cox7b	-0.447	0.00172
cytochrome c oxidase subunit 8A	Cox8a	-0.346	0.000262
cytochrome c, somatic	Cycs	-0.432	0.00207
NADH:ubiquinone oxidoreductase subunit A11	Ndufa11	-0.407	0.00157
NADH:ubiquinone oxidoreductase subunit V3	Ndufv3	-0.398	0.0274

## Sheet: PCEC week 20
Entrez Gene Name	GenBank/Gene Symbol - mouse (Entrez Gene)/miRBase (mature)	Expr Log Ratio	Expr p-value
ATP synthase, H+ transporting, mitochondrial F1 complex, epsilon subunit	Atp5e	-0.558	0.0049
ATP synthase membrane subunit g	Atp5l	-0.485	7.81e-05
cytochrome c oxidase subunit 4I1	Cox4i1	-0.292	0.000727
cytochrome c oxidase subunit 5A	Cox5a	-0.689	0.000116
cytochrome c oxidase subunit 6A1	Cox6a1	-0.433	3.5e-08
cytochrome c oxidase subunit 6B1	Cox6b1	-0.544	7.77e-09
cytochrome c oxidase subunit 6C	Cox6c	-0.64	3.71e-14
cytochrome c oxidase subunit 7A2	Cox7a2	-0.55	7.02e-06
cytochrome c oxidase subunit 8A	Cox8a	-0.468	1.55e-06
NADH:ubiquinone oxidoreductase subunit A2	Ndufa2	-0.608	0.0172
NDUFA4 mitochondrial complex associated	Ndufa4	-0.492	2.21e-08
NADH:ubiquinone oxidoreductase subunit A7	Ndufa7	-0.56	0.0371
NADH:ubiquinone oxidoreductase subunit A11	Ndufa11	-0.676	7.26e-05
NADH:ubiquinone oxidoreductase subunit B4	Ndufb4	-0.801	6.18e-05
ubiquinol-cytochrome c reductase, complex III subunit X	Uqcr10	-0.691	0.00432

## Sheet: GEC week 20
Entrez Gene Name	GenBank/Gene Symbol - mouse (Entrez Gene)/miRBase (mature)	Expr Log Ratio	Expr p-value
ATP synthase membrane subunit g	Atp5l	-1.079	1.12e-08
cytochrome c oxidase subunit 4I1	Cox4i1	-0.391	0.0259
cytochrome c oxidase subunit 6A1	Cox6a1	-0.677	1.47e-07
cytochrome c oxidase subunit 6B1	Cox6b1	-0.799	2e-07
cytochrome c oxidase subunit 6C	Cox6c	-0.964	2.29e-08
cytochrome c oxidase subunit 8A	Cox8a	-0.721	0.0171
NDUFA4 mitochondrial complex associated	Ndufa4	-0.986	8.48e-09
NADH:ubiquinone oxidoreductase subunit B4	Ndufb4	-1.175	9.63e-05
ubiquinol-cytochrome c reductase binding protein	Uqcrb	-0.938	5.76e-08
