# Supplementary material for: Renal Endothelial Single-Cell Transcriptomics Reveals Spatiotemporal Regulation and Divergent Roles of Differential Gene Transcription and Alternative Splicing in Murine Diabetic Nephropathy
Source: Preprints.org preprint supplement (doi:10.20944/preprints202403.1481.v1), 2024-03-25
Supplement: Supplementary file 3 [file supplementary › IJMS_2920974_Supplementary Material/Supplemental File 5_EIF2 signaling.xlsx]

## Sheet: PCEC week 6
Entrez Gene Name	GenBank/Gene Symbol - mouse (Entrez Gene)/miRBase (mature)	Expr Log Ratio	Expr p-value
eukaryotic translation initiation factor 1A X-linked	Eif1a	-0.503	0.00853
eukaryotic translation initiation factor 2A	Eif2a	-0.04	0.00169
eukaryotic translation initiation factor 3 subunit G	Eif3g	-0.609	0.0446
eukaryotic translation initiation factor 4 gamma 2	Eif4g2	0.252	0.0258
FAU ubiquitin like and ribosomal protein S30 fusion	Fau	-0.378	0.000491
phosphatidylinositol-4,5-bisphosphate 3-kinase catalytic subunit delta	Pik3cd	-1.943	0.0112
ribosomal protein L4	Rpl4	-0.347	0.011
ribosomal protein L9	Rpl9	-0.448	0.00424
ribosomal protein L13	Rpl13	-0.403	2.03e-05
ribosomal protein L18	Rpl18	-0.419	0.0212
ribosomal protein L19	Rpl19	-0.402	0.000314
ribosomal protein L13a	Rpl13a	-0.297	0.00426
ribosomal protein L18a	Rpl18a	-0.333	3.66e-05
ribosomal protein S2	Rps2	-0.492	1.73e-06
ribosomal protein S3	Rps3	-0.472	6.42e-07
ribosomal protein S6	Rps6	-0.413	0.0266
ribosomal protein S7	Rps7	-0.53	6.41e-05
ribosomal protein S14	Rps14	-0.307	0.000782
ribosomal protein S18	Rps18	-0.372	0.0171
ribosomal protein S19	Rps19	-0.43	5.99e-08

## Sheet: PCEC week 11
Entrez Gene Name	GenBank/Gene Symbol - mouse (Entrez Gene)/miRBase (mature)	Expr Log Ratio	Expr p-value
activating transcription factor 3	Atf3	-0.151	2.66e-10
cyclin D1	Ccnd1	-0.477	6.9e-06
cyclin dependent kinase 11A	Cdk11b	-0.585	0.000894
eukaryotic translation initiation factor 1A X-linked	Eif1a	-0.615	0.00222
eukaryotic translation initiation factor 2 alpha kinase 2	Eif2ak2	-0.605	0.0168
eukaryotic translation initiation factor 3 subunit E	Eif3e	-0.309	0.00116
eukaryotic translation initiation factor 3 subunit J	Eif3j1	-0.67	0.00207
eukaryotic translation initiation factor 4A2	Eif4a2	-0.304	0.00146
eukaryotic translation initiation factor 5B	Eif5b	-0.448	0.00555
FAU ubiquitin like and ribosomal protein S30 fusion	Fau	-0.307	5.91e-07
glycogen synthase kinase 3 beta	Gsk3b	-0.77	0.0212
s-rRNA	mt-Rnr1	-0.284	2.05e-07
NRAS proto-oncogene, GTPase	Nras	-1.009	7.09e-06
poly(A) binding protein cytoplasmic 1	Pabpc1	-0.138	0.035
poly(A) binding protein interacting protein 1	Paip1	-0.934	0.000718
protein phosphatase 1 catalytic subunit gamma	Ppp1cc	-0.484	0.0209
protein phosphatase 1 regulatory subunit 15A	Ppp1r15a	-0.08	9.2e-11
RAP1B, member of RAS oncogene family	Rap1b	-0.44	7.48e-10
ras related dexamethasone induced 1	Rasd1	0.364	0.0478
ribosomal protein L4	Rpl4	-0.233	0.00447
ribosomal protein L7	Rpl7	-0.289	0.00061
ribosomal protein L9	Rpl9	-0.248	0.00127
ribosomal protein L10	Rpl10	-0.291	0.000187
ribosomal protein L11	Rpl11	-0.371	0.000158
ribosomal protein L13	Rpl13	-0.419	1.51e-16
ribosomal protein L14	Rpl14	-0.399	2.99e-07
ribosomal protein L15	Rpl15	-0.477	1.14e-05
ribosomal protein L17	Rpl17	-0.402	1.64e-08
ribosomal protein L21	Rpl21	-0.424	8.49e-09
ribosomal protein L23	Rpl23	-0.435	3.37e-10
ribosomal protein L26	Rpl26	-0.436	1.31e-10
ribosomal protein L27	Rpl27	-0.255	0.0157
ribosomal protein L30	Rpl30	-0.474	7.73e-11
ribosomal protein L31	Rpl31	-0.258	0.00121
ribosomal protein L35	Rpl35	-0.567	1.22e-11
ribosomal protein L37	Rpl37	-0.46	8.74e-14
ribosomal protein L38	Rpl38	-0.423	1.02e-08
ribosomal protein L39	Rpl39	-0.397	4.75e-05
ribosomal protein L41	Rpl41	-0.387	4.44e-14
ribosomal protein L13a	Rpl13a	-0.268	6.21e-05
ribosomal protein L18a	Rpl18a	-0.404	1.46e-14
ribosomal protein L27a	Rpl27a	-0.465	4.37e-10
ribosomal protein L35a	Rpl35a	-0.494	2.05e-09
ribosomal protein L36A	Rpl36a	-0.464	8.87e-06
ribosomal protein L36a like	Rpl36al	-0.497	1.28e-05
ribosomal protein L37a	Rpl37a	-0.374	1.21e-07
ribosomal protein lateral stalk subunit P2	Rplp2	-0.316	0.000678
ribosomal protein S3	Rps3	-0.229	0.00545
ribosomal protein S5	Rps5	-0.251	0.0047
ribosomal protein S6	Rps6	-0.265	0.014
ribosomal protein S7	Rps7	-0.503	5.2e-11
ribosomal protein S8	Rps8	-0.314	0.000403
ribosomal protein S9	Rps9	-0.311	9.45e-05
ribosomal protein S11	Rps11	-0.352	0.000185
ribosomal protein S13	Rps13	-0.363	0.000381
ribosomal protein S14	Rps14	-0.247	7.04e-05
ribosomal protein S15	Rps15	-0.388	5.53e-09
ribosomal protein S16	Rps16	-0.435	1.16e-12
ribosomal protein S17	Rps17	-0.297	0.000678
ribosomal protein S18	Rps18	-0.39	6.7e-08
ribosomal protein S19	Rps19	-0.42	1.47e-08
ribosomal protein S20	Rps20	-0.448	4.99e-10
ribosomal protein S21	Rps21	-0.428	3.91e-12
ribosomal protein S23	Rps23	-0.517	7.81e-16
ribosomal protein S24	Rps24	-0.383	7.58e-10
ribosomal protein S26	Rps26	-0.524	3.42e-11
ribosomal protein S28	Rps28	-0.363	8.49e-06
ribosomal protein S29	Rps29	-0.426	4.11e-19
ribosomal protein S15a	Rps15a	-0.47	1.02e-07
ribosomal protein S27a	Rps27a	-0.387	1.01e-06
ribosomal protein S27 like	Rps27l	-0.371	0.0392
ribosomal protein S4 Y-linked 1	Rps4x	-0.234	0.0255
X-linked inhibitor of apoptosis	Xiap	-0.202	0.0493

## Sheet: PCEC week 20
Entrez Gene Name	GenBank/Gene Symbol - mouse (Entrez Gene)/miRBase (mature)	Expr Log Ratio	Expr p-value
eukaryotic translation initiation factor 2 subunit gamma	Eif2s3x	0.766	2.2e-05
FAU ubiquitin like and ribosomal protein S30 fusion	Fau	-0.324	7.1e-09
heat shock protein family A (Hsp70) member 5	Hspa5	0.504	0.0172
s-rRNA	mt-Rnr1	-0.427	3.88e-18
l-rRNA	mt-Rnr2	-0.164	7.37e-06
phosphoinositide-3-kinase regulatory subunit 3	Pik3r3	-0.608	0.0445
protein phosphatase 1 catalytic subunit beta	Ppp1cb	-0.516	0.00346
protein phosphatase 1 regulatory subunit 15A	Ppp1r15a	1.212	4.62e-10
ras related dexamethasone induced 1	Rasd1	0.91	0.0201
ribosomal protein L19	Rpl19	-0.254	0.00266
ribosomal protein L21	Rpl21	-0.286	0.00359
ribosomal protein L26	Rpl26	-0.438	0.000107
ribosomal protein L30	Rpl30	-0.334	0.0356
ribosomal protein L31	Rpl31	-0.592	9.1e-12
ribosomal protein L35	Rpl35	-0.437	1.85e-08
ribosomal protein L37	Rpl37	-0.456	1.18e-10
ribosomal protein L38	Rpl38	-0.465	8.72e-06
ribosomal protein L39	Rpl39	-0.615	8.08e-05
ribosomal protein L41	Rpl41	-0.371	9.99e-13
ribosomal protein L10a	Rpl10a	-0.432	0.00392
ribosomal protein L36A	Rpl36a	-0.48	0.00391
ribosomal protein L37a	Rpl37a	-0.544	2.55e-23
ribosomal protein lateral stalk subunit P2	Rplp2	-0.449	1.95e-05
ribosomal protein S14	Rps14	-0.242	0.000222
ribosomal protein S17	Rps17	-0.382	0.0119
ribosomal protein S18	Rps18	-0.326	0.000548
ribosomal protein S19	Rps19	-0.226	0.046
ribosomal protein S21	Rps21	-0.566	1.16e-05
ribosomal protein S23	Rps23	-0.345	3.43e-07
ribosomal protein S24	Rps24	-0.343	0.000103
ribosomal protein S25	Rps25	-0.359	0.00958
ribosomal protein S28	Rps28	-0.23	0.0021
ribosomal protein S29	Rps29	-0.32	3.59e-12
ribosomal protein S15a	Rps15a	-0.621	1.82e-08
ribosomal protein S27a	Rps27a	-0.297	0.00603

## Sheet: GEC week 6
Entrez Gene Name	GenBank/Gene Symbol - mouse (Entrez Gene)/miRBase (mature)	Expr Log Ratio	Expr p-value
AKT serinethreonine kinase 2	Akt2	1.016	0.00198
eukaryotic translation initiation factor 1A Y-linked	Eif1ax	0.548	0.0193
eukaryotic translation initiation factor 4E	Eif4e	0.594	0.00145
eukaryotic translation initiation factor 4 gamma 3	Eif4g3	0.455	0.0437
eukaryotic translation initiation factor 5B	Eif5b	0.799	9.06e-05
HRas proto-oncogene, GTPase	Hras	0.736	0.0156
mitogen-activated protein kinase 3	Mapk3	0.855	6.62e-05
phosphoinositide-3-kinase regulatory subunit 3	Pik3r3	0.127	0.00368
phosphoinositide-3-kinase regulatory subunit 4	Pik3r4	0.474	0.00382
ribosomal protein L21	Rpl21	0.401	0.00915
ribosomal protein L22	Rpl22	-0.093	0.00316
ribosomal protein L38	Rpl38	0.712	0.00177
ribosomal protein L37a	Rpl37a	0.456	0.000593
ribosomal protein S21	Rps21	0.516	0.0129
ribosomal protein S15a	Rps15a	0.484	0.0016

## Sheet: GEC week 20
Entrez Gene Name	GenBank/Gene Symbol - mouse (Entrez Gene)/miRBase (mature)	Expr Log Ratio	Expr p-value
activating transcription factor 3	Atf3	0.937	8.49e-05
FAU ubiquitin like and ribosomal protein S30 fusion	Fau	-0.495	3.74e-07
s-rRNA	mt-Rnr1	-0.527	1.69e-09
l-rRNA	mt-Rnr2	-0.213	5.79e-06
protein phosphatase 1 regulatory subunit 15A	Ppp1r15a	0.906	4.2e-05
ribosomal protein L11	Rpl11	-0.646	3.81e-05
ribosomal protein L21	Rpl21	-0.505	6.45e-06
ribosomal protein L23	Rpl23	-0.606	0.0209
ribosomal protein L31	Rpl31	-0.621	0.00381
ribosomal protein L35	Rpl35	-0.651	1.6e-06
ribosomal protein L37	Rpl37	-0.59	0.000549
ribosomal protein L38	Rpl38	-0.844	0.0014
ribosomal protein L41	Rpl41	-0.537	4.29e-08
ribosomal protein L18a	Rpl18a	-0.338	0.0109
ribosomal protein L35a	Rpl35a	-0.718	0.00125
ribosomal protein L37a	Rpl37a	-0.744	2.48e-11
ribosomal protein lateral stalk subunit P2	Rplp2	-0.522	0.0456
ribosomal protein S14	Rps14	-0.434	9.95e-05
ribosomal protein S17	Rps17	-0.725	2.65e-05
ribosomal protein S19	Rps19	-0.599	4.2e-06
ribosomal protein S23	Rps23	-0.57	2.41e-05
ribosomal protein S26	Rps26	-0.566	0.006
ribosomal protein S28	Rps28	-0.428	0.00433
ribosomal protein S29	Rps29	-0.724	1.31e-12
