# Supplementary material for: Renal Endothelial Single-Cell Transcriptomics Reveals Spatiotemporal Regulation and Divergent Roles of Differential Gene Transcription and Alternative Splicing in Murine Diabetic Nephropathy
Source: Preprints.org preprint supplement (doi:10.20944/preprints202403.1481.v1), 2024-03-25
Supplement: Supplementary file 3 [file supplementary › IJMS_2920974_Supplementary Material/Supplemental File 6_Significant DSE with Sachimi plot links.xlsx]

## Sheet: GEC 6w
GeneID	geneSymbol	PValue	FDR	IncLevel1	IncLevel2	IncLevelDifference	chr	strand	splicingType	coordinates	web	Online figure
ENSMUSG00000031360.13	Ctps2	5.74406e-05	0.00106578	0.723	0	0.723	chrX	+	SE	exonStart_0base 162902575 exonEnd 162902676 upstreamES 162901784 upstreamEE 162901914 downstreamES 162903433 downstreamEE 162903570	https://betsholtzlab.org/Publications/MouseKidenyOB/splicing/GE_Lean_6w_vs_GE_Obese_6w/SE/1_Ctps2_chrX_162901785_162901914_+@chrX_162902576_162902676_+@chrX_162903434_162903570_+.pdf	Online figure
ENSMUSG00000041115.15	Iqsec2	7.51833e-07	7.35401e-05	0.119	1	-0.881	chrX	+	SE	exonStart_0base 152180996 exonEnd 152181092 upstreamES 152178963 upstreamEE 152179090 downstreamES 152193865 downstreamEE 152194601	https://betsholtzlab.org/Publications/MouseKidenyOB/splicing/GE_Lean_6w_vs_GE_Obese_6w/SE/2_Iqsec2_chrX_152178964_152179090_+@chrX_152180997_152181092_+@chrX_152193866_152194601_+.pdf	Online figure
ENSMUSG00000034055.15	Phka1	0.00730316	0.0382606	1	0.277	0.723	chrX	-	SE	exonStart_0base 102592626 exonEnd 102592705 upstreamES 102586076 upstreamEE 102586211 downstreamES 102597401 downstreamEE 102597509	https://betsholtzlab.org/Publications/MouseKidenyOB/splicing/GE_Lean_6w_vs_GE_Obese_6w/SE/3_Phka1_chrX_102597402_102597509_-@chrX_102592627_102592705_-@chrX_102586077_102586211_-.pdf	Online figure
ENSMUSG00000057421.11	Las1l	2.9348e-06	0.000186983	0	0.774	-0.774	chrX	-	SE	exonStart_0base 95947397 exonEnd 95947448 upstreamES 95946866 upstreamEE 95947073 downstreamES 95947769 downstreamEE 95947855	https://betsholtzlab.org/Publications/MouseKidenyOB/splicing/GE_Lean_6w_vs_GE_Obese_6w/SE/4_Las1l_chrX_95947770_95947855_-@chrX_95947398_95947448_-@chrX_95946867_95947073_-.pdf	Online figure
ENSMUSG00000008682.12	Rpl10	4.45653e-05	0.00088713	0	1	-1	chrX	+	SE	exonStart_0base 74270978 exonEnd 74271024 upstreamES 74270811 upstreamEE 74270874 downstreamES 74271659 downstreamEE 74271718	https://betsholtzlab.org/Publications/MouseKidenyOB/splicing/GE_Lean_6w_vs_GE_Obese_6w/SE/5_Rpl10_chrX_74270812_74270874_+@chrX_74270979_74271024_+@chrX_74271660_74271718_+.pdf	Online figure
ENSMUSG00000054737.10	Zfp182	0.000474501	0.0052156	1	0.261	0.739	chrX	-	SE	exonStart_0base 21060502 exonEnd 21060557 upstreamES 21036627 upstreamEE 21036772 downstreamES 21061937 downstreamEE 21062052	https://betsholtzlab.org/Publications/MouseKidenyOB/splicing/GE_Lean_6w_vs_GE_Obese_6w/SE/6_Zfp182_chrX_21061938_21062052_-@chrX_21060503_21060557_-@chrX_21036628_21036772_-.pdf	Online figure
ENSMUSG00000001924.14	Uba1	5.77038e-05	0.00106724	1	0	1	chrX	+	SE	exonStart_0base 20659199 exonEnd 20659296 upstreamES 20658420 upstreamEE 20658526 downstreamES 20668448 downstreamEE 20668565	https://betsholtzlab.org/Publications/MouseKidenyOB/splicing/GE_Lean_6w_vs_GE_Obese_6w/SE/7_Uba1_chrX_20658421_20658526_+@chrX_20659200_20659296_+@chrX_20668449_20668565_+.pdf	Online figure
ENSMUSG00000031060.15	Rbm10	2.24468e-09	1.6243e-06	0	0.86	-0.86	chrX	+	SE	exonStart_0base 20637425 exonEnd 20637656 upstreamES 20635730 upstreamEE 20635914 downstreamES 20639432 downstreamEE 20639502	https://betsholtzlab.org/Publications/MouseKidenyOB/splicing/GE_Lean_6w_vs_GE_Obese_6w/SE/8_Rbm10_chrX_20635731_20635914_+@chrX_20637426_20637656_+@chrX_20639433_20639502_+.pdf	Online figure
ENSMUSG00000025094.7	Slc18a2	0.00190735	0.0143398	0.542	1	-0.458	chr19	+	SE	exonStart_0base 59274493 exonEnd 59274537 upstreamES 59274313 upstreamEE 59274403 downstreamES 59274615 downstreamEE 59274676	https://betsholtzlab.org/Publications/MouseKidenyOB/splicing/GE_Lean_6w_vs_GE_Obese_6w/SE/9_Slc18a2_chr19_59274314_59274403_+@chr19_59274494_59274537_+@chr19_59274616_59274676_+.pdf	Online figure
ENSMUSG00000024985.17	Tcf7l2	1.5702e-06	0.000121199	0	0.538	-0.538	chr19	+	SE	exonStart_0base 55755013 exonEnd 55755082 upstreamES 55743072 upstreamEE 55743197 downstreamES 55817763 downstreamEE 55817865	https://betsholtzlab.org/Publications/MouseKidenyOB/splicing/GE_Lean_6w_vs_GE_Obese_6w/SE/10_Tcf7l2_chr19_55743073_55743197_+@chr19_55755014_55755082_+@chr19_55817764_55817865_+.pdf	Online figure
ENSMUSG00000036748.14	Cuedc2	0.00510154	0.0298311	0.26	0.694	-0.434	chr19	-	SE	exonStart_0base 46338312 exonEnd 46338420 upstreamES 46332617 upstreamEE 46332701 downstreamES 46338568 downstreamEE 46338660	https://betsholtzlab.org/Publications/MouseKidenyOB/splicing/GE_Lean_6w_vs_GE_Obese_6w/SE/11_Cuedc2_chr19_46338569_46338660_-@chr19_46338313_46338420_-@chr19_46332618_46332701_-.pdf	Online figure
ENSMUSG00000025220.7	Mgea5	2.4812e-07	4.48864e-05	1	0.108	0.892	chr19	-	SE	exonStart_0base 45762184 exonEnd 45762270 upstreamES 45761103 upstreamEE 45761208 downstreamES 45765449 downstreamEE 45765624	https://betsholtzlab.org/Publications/MouseKidenyOB/splicing/GE_Lean_6w_vs_GE_Obese_6w/SE/12_Mgea5_chr19_45765450_45765624_-@chr19_45762185_45762270_-@chr19_45761104_45761208_-.pdf	Online figure
ENSMUSG00000001247.15	Lsr	2.06058e-05	0.000576266	1	0	1	chr7	-	SE	exonStart_0base 30962810 exonEnd 30962867 upstreamES 30962097 upstreamEE 30962244 downstreamES 30965968 downstreamEE 30966088	https://betsholtzlab.org/Publications/MouseKidenyOB/splicing/GE_Lean_6w_vs_GE_Obese_6w/SE/13_Lsr_chr7_30965969_30966088_-@chr7_30962811_30962867_-@chr7_30962098_30962244_-.pdf	Online figure
ENSMUSG00000046056.13	Sbsn	4.24656e-09	2.45833e-06	1	0	1	chr7	+	SE	exonStart_0base 30735815 exonEnd 30735962 upstreamES 30734738 upstreamEE 30734768 downstreamES 30754808 downstreamEE 30754880	https://betsholtzlab.org/Publications/MouseKidenyOB/splicing/GE_Lean_6w_vs_GE_Obese_6w/SE/14_Sbsn_chr7_30734739_30734768_+@chr7_30735816_30735962_+@chr7_30754809_30754880_+.pdf	Online figure
ENSMUSG00000030386.16	Zfp606	7.40242e-06	0.000317427	0	1	-1	chr7	+	SE	exonStart_0base 12481117 exonEnd 12481181 upstreamES 12480934 upstreamEE 12481026 downstreamES 12489569 downstreamEE 12489696	https://betsholtzlab.org/Publications/MouseKidenyOB/splicing/GE_Lean_6w_vs_GE_Obese_6w/SE/15_Zfp606_chr7_12480935_12481026_+@chr7_12481118_12481181_+@chr7_12489570_12489696_+.pdf	Online figure
ENSMUSG00000027288.15	Zfp106	0.00023411	0.00305089	0.267	1	-0.733	chr2	-	SE	exonStart_0base 120539294 exonEnd 120539492 upstreamES 120533510 upstreamEE 120535679 downstreamES 120545842 downstreamEE 120545901	https://betsholtzlab.org/Publications/MouseKidenyOB/splicing/GE_Lean_6w_vs_GE_Obese_6w/SE/16_Zfp106_chr2_120545843_120545901_-@chr2_120539295_120539492_-@chr2_120533511_120535679_-.pdf	Online figure
ENSMUSG00000052446.15	Zfp961	7.3125e-05	0.00125984	1	0.222	0.778	chr8	+	SE	exonStart_0base 71965793 exonEnd 71965916 upstreamES 71951065 upstreamEE 71951160 downstreamES 71966099 downstreamEE 71966160	https://betsholtzlab.org/Publications/MouseKidenyOB/splicing/GE_Lean_6w_vs_GE_Obese_6w/SE/17_Zfp961_chr8_71951066_71951160_+@chr8_71965794_71965916_+@chr8_71966100_71966160_+.pdf	Online figure
ENSMUSG00000052446.15	Zfp961	0.000318842	0.00389364	1	0.328	0.672	chr8	+	SE	exonStart_0base 71965793 exonEnd 71965920 upstreamES 71951047 upstreamEE 71951160 downstreamES 71966099 downstreamEE 71966160	https://betsholtzlab.org/Publications/MouseKidenyOB/splicing/GE_Lean_6w_vs_GE_Obese_6w/SE/18_Zfp961_chr8_71951048_71951160_+@chr8_71965794_71965920_+@chr8_71966100_71966160_+.pdf	Online figure
ENSMUSG00000052446.15	Zfp961	0.00526281	0.0304969	1	0.494	0.506	chr8	+	SE	exonStart_0base 71965793 exonEnd 71965920 upstreamES 71951047 upstreamEE 71951160 downstreamES 71967898 downstreamEE 71968080	https://betsholtzlab.org/Publications/MouseKidenyOB/splicing/GE_Lean_6w_vs_GE_Obese_6w/SE/19_Zfp961_chr8_71951048_71951160_+@chr8_71965794_71965920_+@chr8_71967899_71968080_+.pdf	Online figure
ENSMUSG00000052446.15	Zfp961	9.52246e-05	0.00155294	1	0.199	0.801	chr8	+	SE	exonStart_0base 71965793 exonEnd 71965990 upstreamES 71951069 upstreamEE 71951160 downstreamES 71966099 downstreamEE 71966160	https://betsholtzlab.org/Publications/MouseKidenyOB/splicing/GE_Lean_6w_vs_GE_Obese_6w/SE/20_Zfp961_chr8_71951070_71951160_+@chr8_71965794_71965990_+@chr8_71966100_71966160_+.pdf	Online figure
ENSMUSG00000027684.15	Mecom	0.000685884	0.00672031	0	0.601	-0.601	chr3	-	SE	exonStart_0base 29972679 exonEnd 29972706 upstreamES 29966652 upstreamEE 29966819 downstreamES 29977258 downstreamEE 29977346	https://betsholtzlab.org/Publications/MouseKidenyOB/splicing/GE_Lean_6w_vs_GE_Obese_6w/SE/21_Mecom_chr3_29977259_29977346_-@chr3_29972680_29972706_-@chr3_29966653_29966819_-.pdf	Online figure
ENSMUSG00000066406.13	Akap13	1.40764e-05	0.000460188	1	0	1	chr7	+	SE	exonStart_0base 75679819 exonEnd 75679873 upstreamES 75677105 upstreamEE 75677479 downstreamES 75683393 downstreamEE 75683459	https://betsholtzlab.org/Publications/MouseKidenyOB/splicing/GE_Lean_6w_vs_GE_Obese_6w/SE/22_Akap13_chr7_75677106_75677479_+@chr7_75679820_75679873_+@chr7_75683394_75683459_+.pdf	Online figure
ENSMUSG00000058979.7	Cecr5	0.00033522	0.00403448	0.29	1	-0.71	chr6	-	SE	exonStart_0base 120517049 exonEnd 120517080 upstreamES 120514397 upstreamEE 120514572 downstreamES 120518443 downstreamEE 120518537	https://betsholtzlab.org/Publications/MouseKidenyOB/splicing/GE_Lean_6w_vs_GE_Obese_6w/SE/23_Cecr5_chr6_120518444_120518537_-@chr6_120517050_120517080_-@chr6_120514398_120514572_-.pdf	Online figure
ENSMUSG00000030145.13	Zfp248	0.00744684	0.0387329	0	0.483	-0.483	chr6	-	SE	exonStart_0base 118454285 exonEnd 118454341 upstreamES 118453845 upstreamEE 118453887 downstreamES 118454676 downstreamEE 118454756	https://betsholtzlab.org/Publications/MouseKidenyOB/splicing/GE_Lean_6w_vs_GE_Obese_6w/SE/24_Zfp248_chr6_118454677_118454756_-@chr6_118454286_118454341_-@chr6_118453846_118453887_-.pdf	Online figure
ENSMUSG00000030102.9	Itpr1	2.11851e-05	0.000578492	0.069	1	-0.931	chr6	+	SE	exonStart_0base 108365298 exonEnd 108365343 upstreamES 108363609 upstreamEE 108363705 downstreamES 108369010 downstreamEE 108369165	https://betsholtzlab.org/Publications/MouseKidenyOB/splicing/GE_Lean_6w_vs_GE_Obese_6w/SE/25_Itpr1_chr6_108363610_108363705_+@chr6_108365299_108365343_+@chr6_108369011_108369165_+.pdf	Online figure
ENSMUSG00000025038.7	Efhc2	8.66807e-06	0.000348468	0.083	1	-0.917	chrX	-	SE	exonStart_0base 17201045 exonEnd 17201176 upstreamES 17162690 upstreamEE 17162888 downstreamES 17204752 downstreamEE 17204949	https://betsholtzlab.org/Publications/MouseKidenyOB/splicing/GE_Lean_6w_vs_GE_Obese_6w/SE/26_Efhc2_chrX_17204753_17204949_-@chrX_17201046_17201176_-@chrX_17162691_17162888_-.pdf	Online figure
ENSMUSG00000029098.15	Acox3	0.010419	0.0491779	0.251	1	-0.749	chr5	+	SE	exonStart_0base 35598314 exonEnd 35598411 upstreamES 35594309 upstreamEE 35594398 downstreamES 35599691 downstreamEE 35599874	https://betsholtzlab.org/Publications/MouseKidenyOB/splicing/GE_Lean_6w_vs_GE_Obese_6w/SE/27_Acox3_chr5_35594310_35594398_+@chr5_35598315_35598411_+@chr5_35599692_35599874_+.pdf	Online figure
ENSMUSG00000005893.13	Nr2c2	4.44176e-05	0.00088713	0	1	-1	chr6	+	SE	exonStart_0base 92138986 exonEnd 92139026 upstreamES 92105281 upstreamEE 92105365 downstreamES 92139779 downstreamEE 92139890	https://betsholtzlab.org/Publications/MouseKidenyOB/splicing/GE_Lean_6w_vs_GE_Obese_6w/SE/28_Nr2c2_chr6_92105282_92105365_+@chr6_92138987_92139026_+@chr6_92139780_92139890_+.pdf	Online figure
ENSMUSG00000032436.15	Cmtm7	8.25924e-06	0.000338327	1	0.589	0.411	chr9	-	SE	exonStart_0base 114761906 exonEnd 114762005 upstreamES 114758804 upstreamEE 114758886 downstreamES 114763218 downstreamEE 114763392	https://betsholtzlab.org/Publications/MouseKidenyOB/splicing/GE_Lean_6w_vs_GE_Obese_6w/SE/29_Cmtm7_chr9_114763219_114763392_-@chr9_114761907_114762005_-@chr9_114758805_114758886_-.pdf	Online figure
ENSMUSG00000031169.12	Porcn	1.22525e-07	2.62703e-05	0.839	0.049	0.79	chrX	-	SE	exonStart_0base 8197974 exonEnd 8198085 upstreamES 8193847 upstreamEE 8194277 downstreamES 8199066 downstreamEE 8199152	https://betsholtzlab.org/Publications/MouseKidenyOB/splicing/GE_Lean_6w_vs_GE_Obese_6w/SE/30_Porcn_chrX_8199067_8199152_-@chrX_8197975_8198085_-@chrX_8193848_8194277_-.pdf	Online figure
ENSMUSG00000039210.15	Gpatch2	0.00872131	0.0435624	1	0.554	0.446	chr1	+	SE	exonStart_0base 187341486 exonEnd 187341575 upstreamES 187322283 upstreamEE 187322354 downstreamES 187348356 downstreamEE 187349640	https://betsholtzlab.org/Publications/MouseKidenyOB/splicing/GE_Lean_6w_vs_GE_Obese_6w/SE/31_Gpatch2_chr1_187322284_187322354_+@chr1_187341487_187341575_+@chr1_187348357_187349640_+.pdf	Online figure
ENSMUSG00000053119.10	Chmp3	0.00121979	0.01037	0.471	1	-0.529	chr6	+	SE	exonStart_0base 71552398 exonEnd 71552459 upstreamES 71543796 upstreamEE 71544033 downstreamES 71560896 downstreamEE 71561076	https://betsholtzlab.org/Publications/MouseKidenyOB/splicing/GE_Lean_6w_vs_GE_Obese_6w/SE/32_Chmp3_chr6_71543797_71544033_+@chr6_71552399_71552459_+@chr6_71560897_71561076_+.pdf	Online figure
ENSMUSG00000002396.8	Ocel1	0.00308985	0.0205836	0.444	0.879	-0.435	chr8	+	SE	exonStart_0base 71372467 exonEnd 71372633 upstreamES 71371338 upstreamEE 71371985 downstreamES 71372748 downstreamEE 71372802	https://betsholtzlab.org/Publications/MouseKidenyOB/splicing/GE_Lean_6w_vs_GE_Obese_6w/SE/33_Ocel1_chr8_71371339_71371985_+@chr8_71372468_71372633_+@chr8_71372749_71372802_+.pdf	Online figure
ENSMUSG00000038371.13	Sbf2	1.12704e-05	0.000402744	1	0	1	chr7	-	SE	exonStart_0base 110341289 exonEnd 110341364 upstreamES 110339889 upstreamEE 110340074 downstreamES 110348854 downstreamEE 110348995	https://betsholtzlab.org/Publications/MouseKidenyOB/splicing/GE_Lean_6w_vs_GE_Obese_6w/SE/34_Sbf2_chr7_110348855_110348995_-@chr7_110341290_110341364_-@chr7_110339890_110340074_-.pdf	Online figure
ENSMUSG00000073423.8	Zfp414	7.10105e-06	0.000309082	0.053	0.74	-0.687	chr17	+	SE	exonStart_0base 33629621 exonEnd 33629698 upstreamES 33629089 upstreamEE 33629216 downstreamES 33629796 downstreamEE 33630079	https://betsholtzlab.org/Publications/MouseKidenyOB/splicing/GE_Lean_6w_vs_GE_Obese_6w/SE/35_Zfp414_chr17_33629090_33629216_+@chr17_33629622_33629698_+@chr17_33629797_33630079_+.pdf	Online figure
ENSMUSG00000002845.13	Tmem39a	1.03467e-06	8.88903e-05	0	0.595	-0.595	chr16	+	SE	exonStart_0base 38585618 exonEnd 38585680 upstreamES 38585415 upstreamEE 38585518 downstreamES 38586220 downstreamEE 38586890	https://betsholtzlab.org/Publications/MouseKidenyOB/splicing/GE_Lean_6w_vs_GE_Obese_6w/SE/36_Tmem39a_chr16_38585416_38585518_+@chr16_38585619_38585680_+@chr16_38586221_38586890_+.pdf	Online figure
ENSMUSG00000029823.15	Luc7l2	4.34168e-05	0.000882285	1	0	1	chr6	+	SE	exonStart_0base 38554979 exonEnd 38555063 upstreamES 38551333 upstreamEE 38551908 downstreamES 38570509 downstreamEE 38570604	https://betsholtzlab.org/Publications/MouseKidenyOB/splicing/GE_Lean_6w_vs_GE_Obese_6w/SE/37_Luc7l2_chr6_38551334_38551908_+@chr6_38554980_38555063_+@chr6_38570510_38570604_+.pdf	Online figure
ENSMUSG00000059975.13	Zfp74	4.47569e-05	0.000887321	1	0	1	chr7	-	SE	exonStart_0base 29951713 exonEnd 29951893 upstreamES 29943490 upstreamEE 29943545 downstreamES 29953854 downstreamEE 29954087	https://betsholtzlab.org/Publications/MouseKidenyOB/splicing/GE_Lean_6w_vs_GE_Obese_6w/SE/38_Zfp74_chr7_29953855_29954087_-@chr7_29951714_29951893_-@chr7_29943491_29943545_-.pdf	Online figure
ENSMUSG00000018001.17	Cyth3	2.26834e-05	0.000600108	1	0	1	chr5	+	SE	exonStart_0base 143650526 exonEnd 143650609 upstreamES 143634065 upstreamEE 143634173 downstreamES 143684395 downstreamEE 143684478	https://betsholtzlab.org/Publications/MouseKidenyOB/splicing/GE_Lean_6w_vs_GE_Obese_6w/SE/39_Cyth3_chr5_143634066_143634173_+@chr5_143650527_143650609_+@chr5_143684396_143684478_+.pdf	Online figure
ENSMUSG00000079435.8	Rpl36a	6.37392e-05	0.00114626	0	1	-1	chrX	+	SE	exonStart_0base 134586510 exonEnd 134586578 upstreamES 134585688 upstreamEE 134586183 downstreamES 134587450 downstreamEE 134587573	https://betsholtzlab.org/Publications/MouseKidenyOB/splicing/GE_Lean_6w_vs_GE_Obese_6w/SE/40_Rpl36a_chrX_134585689_134586183_+@chrX_134586511_134586578_+@chrX_134587451_134587573_+.pdf	Online figure
ENSMUSG00000079435.8	Rpl36a	6.39607e-05	0.00114634	0	1	-1	chrX	+	SE	exonStart_0base 134586511 exonEnd 134586578 upstreamES 134585700 upstreamEE 134586183 downstreamES 134587450 downstreamEE 134587573	https://betsholtzlab.org/Publications/MouseKidenyOB/splicing/GE_Lean_6w_vs_GE_Obese_6w/SE/41_Rpl36a_chrX_134585701_134586183_+@chrX_134586512_134586578_+@chrX_134587451_134587573_+.pdf	Online figure
ENSMUSG00000029027.7	Dffb	0.00245795	0.0172762	0	0.479	-0.479	chr4	-	SE	exonStart_0base 153972607 exonEnd 153972678 upstreamES 153971580 upstreamEE 153971660 downstreamES 153972779 downstreamEE 153972968	https://betsholtzlab.org/Publications/MouseKidenyOB/splicing/GE_Lean_6w_vs_GE_Obese_6w/SE/42_Dffb_chr4_153972780_153972968_-@chr4_153972608_153972678_-@chr4_153971581_153971660_-.pdf	Online figure
ENSMUSG00000029446.13	Psph	0.00233026	0.0167194	0.432	0	0.432	chr5	-	SE	exonStart_0base 129776829 exonEnd 129776941 upstreamES 129771475 upstreamEE 129771632 downstreamES 129779021 downstreamEE 129779248	https://betsholtzlab.org/Publications/MouseKidenyOB/splicing/GE_Lean_6w_vs_GE_Obese_6w/SE/43_Psph_chr5_129779022_129779248_-@chr5_129776830_129776941_-@chr5_129771476_129771632_-.pdf	Online figure
ENSMUSG00000038023.11	Atp6v0a2	3.69357e-06	0.000209628	0	0.713	-0.713	chr5	+	SE	exonStart_0base 124641103 exonEnd 124641370 upstreamES 124639194 upstreamEE 124639283 downstreamES 124641469 downstreamEE 124641596	https://betsholtzlab.org/Publications/MouseKidenyOB/splicing/GE_Lean_6w_vs_GE_Obese_6w/SE/44_Atp6v0a2_chr5_124639195_124639283_+@chr5_124641104_124641370_+@chr5_124641470_124641596_+.pdf	Online figure
ENSMUSG00000038095.14	Sbno1	4.24076e-05	0.000873982	0.241	1	-0.759	chr5	-	SE	exonStart_0base 124413184 exonEnd 124413289 upstreamES 124410069 upstreamEE 124410379 downstreamES 124414398 downstreamEE 124414527	https://betsholtzlab.org/Publications/MouseKidenyOB/splicing/GE_Lean_6w_vs_GE_Obese_6w/SE/45_Sbno1_chr5_124414399_124414527_-@chr5_124413185_124413289_-@chr5_124410070_124410379_-.pdf	Online figure
ENSMUSG00000064302.12	Clasp1	7.35579e-05	0.00125984	1	0	1	chr1	+	SE	exonStart_0base 118541674 exonEnd 118541698 upstreamES 118539265 upstreamEE 118539369 downstreamES 118543101 downstreamEE 118543346	https://betsholtzlab.org/Publications/MouseKidenyOB/splicing/GE_Lean_6w_vs_GE_Obese_6w/SE/46_Clasp1_chr1_118539266_118539369_+@chr1_118541675_118541698_+@chr1_118543102_118543346_+.pdf	Online figure
ENSMUSG00000059439.14	Bcas3	1.49419e-05	0.0004701	0	1	-1	chr11	+	SE	exonStart_0base 85813999 exonEnd 85814065 upstreamES 85801784 upstreamEE 85801952 downstreamES 85822021 downstreamEE 85822112	https://betsholtzlab.org/Publications/MouseKidenyOB/splicing/GE_Lean_6w_vs_GE_Obese_6w/SE/47_Bcas3_chr11_85801785_85801952_+@chr11_85814000_85814065_+@chr11_85822022_85822112_+.pdf	Online figure
ENSMUSG00000059439.14	Bcas3	0.00394053	0.0249581	1	0.259	0.741	chr11	+	SE	exonStart_0base 85822021 exonEnd 85822112 upstreamES 85801820 upstreamEE 85801952 downstreamES 85825201 downstreamEE 85825390	https://betsholtzlab.org/Publications/MouseKidenyOB/splicing/GE_Lean_6w_vs_GE_Obese_6w/SE/48_Bcas3_chr11_85801821_85801952_+@chr11_85822022_85822112_+@chr11_85825202_85825390_+.pdf	Online figure
ENSMUSG00000041890.16	Git2	2.10461e-05	0.000577422	0.408	0.829	-0.421	chr5	-	SE	exonStart_0base 114743730 exonEnd 114743880 upstreamES 114739032 upstreamEE 114739281 downstreamES 114745428 downstreamEE 114745571	https://betsholtzlab.org/Publications/MouseKidenyOB/splicing/GE_Lean_6w_vs_GE_Obese_6w/SE/49_Git2_chr5_114745429_114745571_-@chr5_114743731_114743880_-@chr5_114739033_114739281_-.pdf	Online figure
ENSMUSG00000041890.16	Git2	9.10601e-06	0.00036355	0.232	0.734	-0.502	chr5	-	SE	exonStart_0base 114743775 exonEnd 114743880 upstreamES 114739032 upstreamEE 114739281 downstreamES 114745428 downstreamEE 114745571	https://betsholtzlab.org/Publications/MouseKidenyOB/splicing/GE_Lean_6w_vs_GE_Obese_6w/SE/50_Git2_chr5_114745429_114745571_-@chr5_114743776_114743880_-@chr5_114739033_114739281_-.pdf	Online figure
ENSMUSG00000086247.6	Gm15787	0.000204362	0.00277712	0.342	1	-0.658	chr5	-	SE	exonStart_0base 110168194 exonEnd 110168484 upstreamES 110162452 upstreamEE 110162609 downstreamES 110176316 downstreamEE 110176466	https://betsholtzlab.org/Publications/MouseKidenyOB/splicing/GE_Lean_6w_vs_GE_Obese_6w/SE/51_Gm15787_chr5_110176317_110176466_-@chr5_110168195_110168484_-@chr5_110162453_110162609_-.pdf	Online figure
ENSMUSG00000086247.6	Gm15787	9.43297e-05	0.0015502	0.155	1	-0.845	chr5	-	SE	exonStart_0base 110170262 exonEnd 110170347 upstreamES 110167507 upstreamEE 110168484 downstreamES 110176316 downstreamEE 110176504	https://betsholtzlab.org/Publications/MouseKidenyOB/splicing/GE_Lean_6w_vs_GE_Obese_6w/SE/52_Gm15787_chr5_110176317_110176504_-@chr5_110170263_110170347_-@chr5_110167508_110168484_-.pdf	Online figure
ENSMUSG00000086247.6	Gm15787	3.1257e-05	0.000707858	0	1	-1	chr5	-	SE	exonStart_0base 110173279 exonEnd 110173424 upstreamES 110168194 upstreamEE 110168484 downstreamES 110176316 downstreamEE 110176466	https://betsholtzlab.org/Publications/MouseKidenyOB/splicing/GE_Lean_6w_vs_GE_Obese_6w/SE/53_Gm15787_chr5_110176317_110176466_-@chr5_110173280_110173424_-@chr5_110168195_110168484_-.pdf	Online figure
ENSMUSG00000025968.15	Ndufs1	9.55951e-05	0.00155449	0.114	0.658	-0.544	chr1	-	SE	exonStart_0base 63172153 exonEnd 63172257 upstreamES 63170848 upstreamEE 63170914 downstreamES 63176427 downstreamEE 63176524	https://betsholtzlab.org/Publications/MouseKidenyOB/splicing/GE_Lean_6w_vs_GE_Obese_6w/SE/54_Ndufs1_chr1_63176428_63176524_-@chr1_63172154_63172257_-@chr1_63170849_63170914_-.pdf	Online figure
ENSMUSG00000025968.15	Ndufs1	1.69803e-05	0.000509034	0.104	0.665	-0.561	chr1	-	SE	exonStart_0base 63172153 exonEnd 63172257 upstreamES 63170848 upstreamEE 63170914 downstreamES 63176585 downstreamEE 63176669	https://betsholtzlab.org/Publications/MouseKidenyOB/splicing/GE_Lean_6w_vs_GE_Obese_6w/SE/55_Ndufs1_chr1_63176586_63176669_-@chr1_63172154_63172257_-@chr1_63170849_63170914_-.pdf	Online figure
ENSMUSG00000049676.13	Catsperg1	2.87999e-05	0.000700514	0	1	-1	chr7	-	SE	exonStart_0base 29206804 exonEnd 29206949 upstreamES 29202263 upstreamEE 29202435 downstreamES 29210479 downstreamEE 29210509	https://betsholtzlab.org/Publications/MouseKidenyOB/splicing/GE_Lean_6w_vs_GE_Obese_6w/SE/56_Catsperg1_chr7_29210480_29210509_-@chr7_29206805_29206949_-@chr7_29202264_29202435_-.pdf	Online figure
ENSMUSG00000055923.15	Aasdh	0.000619857	0.00633795	1	0.322	0.678	chr5	-	SE	exonStart_0base 76904958 exonEnd 76905012 upstreamES 76904208 upstreamEE 76904380 downstreamES 76905422 downstreamEE 76905487	https://betsholtzlab.org/Publications/MouseKidenyOB/splicing/GE_Lean_6w_vs_GE_Obese_6w/SE/57_Aasdh_chr5_76905423_76905487_-@chr5_76904959_76905012_-@chr5_76904209_76904380_-.pdf	Online figure
ENSMUSG00000020358.16	Hnrnpab	0.00024431	0.00315694	0.537	1	-0.463	chr11	-	SE	exonStart_0base 51606339 exonEnd 51606586 upstreamES 51605460 upstreamEE 51605629 downstreamES 51606666 downstreamEE 51606847	https://betsholtzlab.org/Publications/MouseKidenyOB/splicing/GE_Lean_6w_vs_GE_Obese_6w/SE/58_Hnrnpab_chr11_51606667_51606847_-@chr11_51606340_51606586_-@chr11_51605461_51605629_-.pdf	Online figure
ENSMUSG00000029227.14	Fip1l1	0.000104001	0.00165858	0.82	0.319	0.501	chr5	+	SE	exonStart_0base 74564518 exonEnd 74564626 upstreamES 74557039 upstreamEE 74557149 downstreamES 74571098 downstreamEE 74571192	https://betsholtzlab.org/Publications/MouseKidenyOB/splicing/GE_Lean_6w_vs_GE_Obese_6w/SE/59_Fip1l1_chr5_74557040_74557149_+@chr5_74564519_74564626_+@chr5_74571099_74571192_+.pdf	Online figure
ENSMUSG00000024613.15	Tcof1	0.00434783	0.026691	0.592	1	-0.408	chr18	-	SE	exonStart_0base 60832165 exonEnd 60832309 upstreamES 60831773 upstreamEE 60831995 downstreamES 60832426 downstreamEE 60832624	https://betsholtzlab.org/Publications/MouseKidenyOB/splicing/GE_Lean_6w_vs_GE_Obese_6w/SE/60_Tcof1_chr18_60832427_60832624_-@chr18_60832166_60832309_-@chr18_60831774_60831995_-.pdf	Online figure
ENSMUSG00000087380.6	2210408F21Rik	5.25465e-05	0.00099735	0.137	1	-0.863	chr6	+	SE	exonStart_0base 31336803 exonEnd 31336857 upstreamES 31335990 upstreamEE 31336062 downstreamES 31337229 downstreamEE 31337247	https://betsholtzlab.org/Publications/MouseKidenyOB/splicing/GE_Lean_6w_vs_GE_Obese_6w/SE/61_2210408F21Rik_chr6_31335991_31336062_+@chr6_31336804_31336857_+@chr6_31337230_31337247_+.pdf	Online figure
ENSMUSG00000071337.10	Tia1	0.000672848	0.00661365	0.362	1	-0.638	chr6	+	SE	exonStart_0base 86423605 exonEnd 86423671 upstreamES 86419928 upstreamEE 86420411 downstreamES 86424344 downstreamEE 86424420	https://betsholtzlab.org/Publications/MouseKidenyOB/splicing/GE_Lean_6w_vs_GE_Obese_6w/SE/62_Tia1_chr6_86419929_86420411_+@chr6_86423606_86423671_+@chr6_86424345_86424420_+.pdf	Online figure
ENSMUSG00000001138.12	Cnnm3	0.00362076	0.0234721	0.439	1	-0.561	chr1	+	SE	exonStart_0base 36520518 exonEnd 36520688 upstreamES 36520077 upstreamEE 36520227 downstreamES 36520818 downstreamEE 36520915	https://betsholtzlab.org/Publications/MouseKidenyOB/splicing/GE_Lean_6w_vs_GE_Obese_6w/SE/63_Cnnm3_chr1_36520078_36520227_+@chr1_36520519_36520688_+@chr1_36520819_36520915_+.pdf	Online figure
ENSMUSG00000059796.15	Eif4a1	3.38607e-05	0.000734156	0.714	0	0.714	chr11	-	SE	exonStart_0base 69670927 exonEnd 69670976 upstreamES 69669077 upstreamEE 69670747 downstreamES 69672278 downstreamEE 69672317	https://betsholtzlab.org/Publications/MouseKidenyOB/splicing/GE_Lean_6w_vs_GE_Obese_6w/SE/64_Eif4a1_chr11_69672279_69672317_-@chr11_69670928_69670976_-@chr11_69669078_69670747_-.pdf	Online figure
ENSMUSG00000073096.10	Lrrc61	2.95504e-05	0.000707858	1	0.115	0.885	chr6	+	SE	exonStart_0base 48556954 exonEnd 48557094 upstreamES 48554828 upstreamEE 48554961 downstreamES 48568136 downstreamEE 48568221	https://betsholtzlab.org/Publications/MouseKidenyOB/splicing/GE_Lean_6w_vs_GE_Obese_6w/SE/65_Lrrc61_chr6_48554829_48554961_+@chr6_48556955_48557094_+@chr6_48568137_48568221_+.pdf	Online figure
ENSMUSG00000029089.7	Pacrgl	0.00801473	0.0406281	1	0.551	0.449	chr5	+	SE	exonStart_0base 48377074 exonEnd 48377165 upstreamES 48375542 upstreamEE 48375610 downstreamES 48379329 downstreamEE 48379464	https://betsholtzlab.org/Publications/MouseKidenyOB/splicing/GE_Lean_6w_vs_GE_Obese_6w/SE/66_Pacrgl_chr5_48375543_48375610_+@chr5_48377075_48377165_+@chr5_48379330_48379464_+.pdf	Online figure
ENSMUSG00000029089.7	Pacrgl	9.44089e-06	0.000364355	0	1	-1	chr5	+	SE	exonStart_0base 48380123 exonEnd 48380231 upstreamES 48379329 upstreamEE 48379464 downstreamES 48381786 downstreamEE 48381867	https://betsholtzlab.org/Publications/MouseKidenyOB/splicing/GE_Lean_6w_vs_GE_Obese_6w/SE/67_Pacrgl_chr5_48379330_48379464_+@chr5_48380124_48380231_+@chr5_48381787_48381867_+.pdf	Online figure
ENSMUSG00000015882.16	Lcorl	0.000503763	0.00548174	0.336	1	-0.664	chr5	-	SE	exonStart_0base 45776419 exonEnd 45776499 upstreamES 45775258 upstreamEE 45775521 downstreamES 45795292 downstreamEE 45795358	https://betsholtzlab.org/Publications/MouseKidenyOB/splicing/GE_Lean_6w_vs_GE_Obese_6w/SE/68_Lcorl_chr5_45795293_45795358_-@chr5_45776420_45776499_-@chr5_45775259_45775521_-.pdf	Online figure
ENSMUSG00000054520.14	Sh3bp2	0.00655767	0.0353586	0.293	1	-0.707	chr5	+	SE	exonStart_0base 34557294 exonEnd 34557363 upstreamES 34556890 upstreamEE 34556979 downstreamES 34559000 downstreamEE 34559649	https://betsholtzlab.org/Publications/MouseKidenyOB/splicing/GE_Lean_6w_vs_GE_Obese_6w/SE/69_Sh3bp2_chr5_34556891_34556979_+@chr5_34557295_34557363_+@chr5_34559001_34559649_+.pdf	Online figure
ENSMUSG00000057406.15	Whsc1	0.000497084	0.00542947	1	0.171	0.829	chr5	+	SE	exonStart_0base 33821658 exonEnd 33821728 upstreamES 33820724 upstreamEE 33820877 downstreamES 33843111 downstreamEE 33843737	https://betsholtzlab.org/Publications/MouseKidenyOB/splicing/GE_Lean_6w_vs_GE_Obese_6w/SE/70_Whsc1_chr5_33820725_33820877_+@chr5_33821659_33821728_+@chr5_33843112_33843737_+.pdf	Online figure
ENSMUSG00000057406.15	Whsc1	0.000145779	0.00214736	0	0.731	-0.731	chr5	+	SE	exonStart_0base 33871406 exonEnd 33871501 upstreamES 33868753 upstreamEE 33868878 downstreamES 33879057 downstreamEE 33879189	https://betsholtzlab.org/Publications/MouseKidenyOB/splicing/GE_Lean_6w_vs_GE_Obese_6w/SE/71_Whsc1_chr5_33868754_33868878_+@chr5_33871407_33871501_+@chr5_33879058_33879189_+.pdf	Online figure
ENSMUSG00000057406.15	Whsc1	0.000109342	0.0017154	0	0.68	-0.68	chr5	+	SE	exonStart_0base 33871406 exonEnd 33871634 upstreamES 33868753 upstreamEE 33868878 downstreamES 33879057 downstreamEE 33879189	https://betsholtzlab.org/Publications/MouseKidenyOB/splicing/GE_Lean_6w_vs_GE_Obese_6w/SE/72_Whsc1_chr5_33868754_33868878_+@chr5_33871407_33871634_+@chr5_33879058_33879189_+.pdf	Online figure
ENSMUSG00000027884.15	Clcc1	9.3372e-06	0.000364355	0.038	1	-0.962	chr3	+	SE	exonStart_0base 108654591 exonEnd 108654750 upstreamES 108653957 upstreamEE 108654051 downstreamES 108661354 downstreamEE 108661495	https://betsholtzlab.org/Publications/MouseKidenyOB/splicing/GE_Lean_6w_vs_GE_Obese_6w/SE/73_Clcc1_chr3_108653958_108654051_+@chr3_108654592_108654750_+@chr3_108661355_108661495_+.pdf	Online figure
ENSMUSG00000048271.13	Rbm33	4.0847e-05	0.000856751	0.127	1	-0.873	chr5	+	SE	exonStart_0base 28342394 exonEnd 28342514 upstreamES 28338995 upstreamEE 28339308 downstreamES 28352471 downstreamEE 28352643	https://betsholtzlab.org/Publications/MouseKidenyOB/splicing/GE_Lean_6w_vs_GE_Obese_6w/SE/74_Rbm33_chr5_28338996_28339308_+@chr5_28342395_28342514_+@chr5_28352472_28352643_+.pdf	Online figure
ENSMUSG00000029004.14	Kmt2e	5.18822e-05	0.000993495	1	0	1	chr5	+	SE	exonStart_0base 23491446 exonEnd 23491613 upstreamES 23486301 upstreamEE 23486400 downstreamES 23492267 downstreamEE 23492432	https://betsholtzlab.org/Publications/MouseKidenyOB/splicing/GE_Lean_6w_vs_GE_Obese_6w/SE/75_Kmt2e_chr5_23486302_23486400_+@chr5_23491447_23491613_+@chr5_23492268_23492432_+.pdf	Online figure
ENSMUSG00000073147.3	5031425E22Rik	0.000347597	0.00414895	0	0.635	-0.635	chr5	-	SE	exonStart_0base 23423223 exonEnd 23423343 upstreamES 23422403 upstreamEE 23422902 downstreamES 23433209 downstreamEE 23433309	https://betsholtzlab.org/Publications/MouseKidenyOB/splicing/GE_Lean_6w_vs_GE_Obese_6w/SE/76_5031425E22Rik_chr5_23433210_23433309_-@chr5_23423224_23423343_-@chr5_23422404_23422902_-.pdf	Online figure
ENSMUSG00000038525.15	Armc10	3.93506e-05	0.00083139	0	1	-1	chr5	+	SE	exonStart_0base 21647307 exonEnd 21647448 upstreamES 21646016 upstreamEE 21646235 downstreamES 21648619 downstreamEE 21648663	https://betsholtzlab.org/Publications/MouseKidenyOB/splicing/GE_Lean_6w_vs_GE_Obese_6w/SE/77_Armc10_chr5_21646017_21646235_+@chr5_21647308_21647448_+@chr5_21648620_21648663_+.pdf	Online figure
ENSMUSG00000020268.12	Lyrm7	4.36948e-06	0.000229954	0	1	-1	chr11	-	SE	exonStart_0base 54853226 exonEnd 54853299 upstreamES 54850173 upstreamEE 54850415 downstreamES 54860551 downstreamEE 54860585	https://betsholtzlab.org/Publications/MouseKidenyOB/splicing/GE_Lean_6w_vs_GE_Obese_6w/SE/78_Lyrm7_chr11_54860552_54860585_-@chr11_54853227_54853299_-@chr11_54850174_54850415_-.pdf	Online figure
ENSMUSG00000025860.13	Xiap	0.000843307	0.00789952	1	0.136	0.864	chrX	+	SE	exonStart_0base 42071241 exonEnd 42071503 upstreamES 42068409 upstreamEE 42068482 downstreamES 42072473 downstreamEE 42072637	https://betsholtzlab.org/Publications/MouseKidenyOB/splicing/GE_Lean_6w_vs_GE_Obese_6w/SE/79_Xiap_chrX_42068410_42068482_+@chrX_42071242_42071503_+@chrX_42072474_42072637_+.pdf	Online figure
ENSMUSG00000054099.10	Slc25a40	0.000932837	0.00845101	0	0.415	-0.415	chr5	+	SE	exonStart_0base 8427195 exonEnd 8427267 upstreamES 8422849 upstreamEE 8423039 downstreamES 8427407 downstreamEE 8427516	https://betsholtzlab.org/Publications/MouseKidenyOB/splicing/GE_Lean_6w_vs_GE_Obese_6w/SE/80_Slc25a40_chr5_8422850_8423039_+@chr5_8427196_8427267_+@chr5_8427408_8427516_+.pdf	Online figure
ENSMUSG00000040407.16	Akap9	0.00235513	0.0168527	0.576	1	-0.424	chr5	+	SE	exonStart_0base 3960111 exonEnd 3962457 upstreamES 3957623 upstreamEE 3957800 downstreamES 3968579 downstreamEE 3968793	https://betsholtzlab.org/Publications/MouseKidenyOB/splicing/GE_Lean_6w_vs_GE_Obese_6w/SE/81_Akap9_chr5_3957624_3957800_+@chr5_3960112_3962457_+@chr5_3968580_3968793_+.pdf	Online figure
ENSMUSG00000040407.16	Akap9	3.03319e-05	0.000707858	1	0	1	chr5	+	SE	exonStart_0base 4028373 exonEnd 4028536 upstreamES 4013849 upstreamEE 4014079 downstreamES 4029839 downstreamEE 4030052	https://betsholtzlab.org/Publications/MouseKidenyOB/splicing/GE_Lean_6w_vs_GE_Obese_6w/SE/82_Akap9_chr5_4013850_4014079_+@chr5_4028374_4028536_+@chr5_4029840_4030052_+.pdf	Online figure
ENSMUSG00000087381.7	Gm16008	4.27253e-05	0.000873982	0	1	-1	chr4	-	SE	exonStart_0base 156030421 exonEnd 156030516 upstreamES 156028474 upstreamEE 156028554 downstreamES 156031577 downstreamEE 156031622	https://betsholtzlab.org/Publications/MouseKidenyOB/splicing/GE_Lean_6w_vs_GE_Obese_6w/SE/83_Gm16008_chr4_156031578_156031622_-@chr4_156030422_156030516_-@chr4_156028475_156028554_-.pdf	Online figure
ENSMUSG00000029060.16	Mib2	0.00167107	0.0130375	0.319	1	-0.681	chr4	-	SE	exonStart_0base 155658893 exonEnd 155659001 upstreamES 155657854 upstreamEE 155657959 downstreamES 155659122 downstreamEE 155659265	https://betsholtzlab.org/Publications/MouseKidenyOB/splicing/GE_Lean_6w_vs_GE_Obese_6w/SE/84_Mib2_chr4_155659123_155659265_-@chr4_155658894_155659001_-@chr4_155657855_155657959_-.pdf	Online figure
ENSMUSG00000030452.15	Nipa2	7.30998e-05	0.00125984	1	0.257	0.743	chr7	-	SE	exonStart_0base 55961451 exonEnd 55961572 upstreamES 55944480 upstreamEE 55944709 downstreamES 55962395 downstreamEE 55962430	https://betsholtzlab.org/Publications/MouseKidenyOB/splicing/GE_Lean_6w_vs_GE_Obese_6w/SE/85_Nipa2_chr7_55962396_55962430_-@chr7_55961452_55961572_-@chr7_55944481_55944709_-.pdf	Online figure
ENSMUSG00000041241.11	Mul1	3.19136e-05	0.000707858	0.45	0	0.45	chr4	+	SE	exonStart_0base 138436179 exonEnd 138436399 upstreamES 138434676 upstreamEE 138434879 downstreamES 138437627 downstreamEE 138437715	https://betsholtzlab.org/Publications/MouseKidenyOB/splicing/GE_Lean_6w_vs_GE_Obese_6w/SE/86_Mul1_chr4_138434677_138434879_+@chr4_138436180_138436399_+@chr4_138437628_138437715_+.pdf	Online figure
ENSMUSG00000028755.3	Cda	0.000792957	0.00752529	0.314	1	-0.686	chr4	-	SE	exonStart_0base 138343506 exonEnd 138343564 upstreamES 138338527 upstreamEE 138339000 downstreamES 138351183 downstreamEE 138351295	https://betsholtzlab.org/Publications/MouseKidenyOB/splicing/GE_Lean_6w_vs_GE_Obese_6w/SE/87_Cda_chr4_138351184_138351295_-@chr4_138343507_138343564_-@chr4_138338528_138339000_-.pdf	Online figure
ENSMUSG00000068747.13	Sort1	1.75709e-05	0.000516336	0	1	-1	chr3	+	SE	exonStart_0base 108355471 exonEnd 108355570 upstreamES 108354132 upstreamEE 108354241 downstreamES 108356230 downstreamEE 108356337	https://betsholtzlab.org/Publications/MouseKidenyOB/splicing/GE_Lean_6w_vs_GE_Obese_6w/SE/88_Sort1_chr3_108354133_108354241_+@chr3_108355472_108355570_+@chr3_108356231_108356337_+.pdf	Online figure
ENSMUSG00000028809.15	Srrm1	1.65642e-05	0.000507355	1	0.119	0.881	chr4	-	SE	exonStart_0base 135329003 exonEnd 135329045 upstreamES 135327091 upstreamEE 135327223 downstreamES 135329372 downstreamEE 135329517	https://betsholtzlab.org/Publications/MouseKidenyOB/splicing/GE_Lean_6w_vs_GE_Obese_6w/SE/89_Srrm1_chr4_135329373_135329517_-@chr4_135329004_135329045_-@chr4_135327092_135327223_-.pdf	Online figure
ENSMUSG00000039473.7	Ubn1	2.93927e-06	0.000186983	0	1	-1	chr16	+	SE	exonStart_0base 5053727 exonEnd 5053841 upstreamES 5050067 upstreamEE 5050781 downstreamES 5055076 downstreamEE 5055364	https://betsholtzlab.org/Publications/MouseKidenyOB/splicing/GE_Lean_6w_vs_GE_Obese_6w/SE/90_Ubn1_chr16_5050068_5050781_+@chr16_5053728_5053841_+@chr16_5055077_5055364_+.pdf	Online figure
ENSMUSG00000030314.15	Atg7	0.000773978	0.00741814	1	0.224	0.776	chr6	+	SE	exonStart_0base 114646936 exonEnd 114647057 upstreamES 114643126 upstreamEE 114643150 downstreamES 114672973 downstreamEE 114673140	https://betsholtzlab.org/Publications/MouseKidenyOB/splicing/GE_Lean_6w_vs_GE_Obese_6w/SE/91_Atg7_chr6_114643127_114643150_+@chr6_114646937_114647057_+@chr6_114672974_114673140_+.pdf	Online figure
ENSMUSG00000030314.15	Atg7	0.0061641	0.0337277	1	0.49	0.51	chr6	+	SE	exonStart_0base 114672790 exonEnd 114672843 upstreamES 114643130 upstreamEE 114643150 downstreamES 114672973 downstreamEE 114673115	https://betsholtzlab.org/Publications/MouseKidenyOB/splicing/GE_Lean_6w_vs_GE_Obese_6w/SE/92_Atg7_chr6_114643131_114643150_+@chr6_114672791_114672843_+@chr6_114672974_114673115_+.pdf	Online figure
ENSMUSG00000028901.12	Gmeb1	0.00921206	0.0452705	0.304	1	-0.696	chr4	-	SE	exonStart_0base 132252430 exonEnd 132252493 upstreamES 132251674 upstreamEE 132251832 downstreamES 132261490 downstreamEE 132261521	https://betsholtzlab.org/Publications/MouseKidenyOB/splicing/GE_Lean_6w_vs_GE_Obese_6w/SE/93_Gmeb1_chr4_132261491_132261521_-@chr4_132252431_132252493_-@chr4_132251675_132251832_-.pdf	Online figure
ENSMUSG00000053730.14	Tmem39b	0.00028654	0.00358268	0	0.65	-0.65	chr4	-	SE	exonStart_0base 129692635 exonEnd 129692718 upstreamES 129692432 upstreamEE 129692516 downstreamES 129693065 downstreamEE 129693285	https://betsholtzlab.org/Publications/MouseKidenyOB/splicing/GE_Lean_6w_vs_GE_Obese_6w/SE/94_Tmem39b_chr4_129693066_129693285_-@chr4_129692636_129692718_-@chr4_129692433_129692516_-.pdf	Online figure
ENSMUSG00000028799.14	Zfp362	0.00294014	0.0198374	0.691	0.107	0.584	chr4	-	SE	exonStart_0base 128794850 exonEnd 128794976 upstreamES 128790249 upstreamEE 128790313 downstreamES 128806011 downstreamEE 128806045	https://betsholtzlab.org/Publications/MouseKidenyOB/splicing/GE_Lean_6w_vs_GE_Obese_6w/SE/95_Zfp362_chr4_128806012_128806045_-@chr4_128794851_128794976_-@chr4_128790250_128790313_-.pdf	Online figure
ENSMUSG00000042508.15	Dmtf1	0.00383396	0.0243899	0.638	0.201	0.437	chr5	-	SE	exonStart_0base 9126539 exonEnd 9126749 upstreamES 9124441 upstreamEE 9124527 downstreamES 9127956 downstreamEE 9128108	https://betsholtzlab.org/Publications/MouseKidenyOB/splicing/GE_Lean_6w_vs_GE_Obese_6w/SE/96_Dmtf1_chr5_9127957_9128108_-@chr5_9126540_9126749_-@chr5_9124442_9124527_-.pdf	Online figure
ENSMUSG00000028894.17	Inpp5b	0.00481931	0.0287296	1	0.25	0.75	chr4	+	SE	exonStart_0base 124743635 exonEnd 124743733 upstreamES 124742812 upstreamEE 124743030 downstreamES 124743873 downstreamEE 124743903	https://betsholtzlab.org/Publications/MouseKidenyOB/splicing/GE_Lean_6w_vs_GE_Obese_6w/SE/97_Inpp5b_chr4_124742813_124743030_+@chr4_124743636_124743733_+@chr4_124743874_124743903_+.pdf	Online figure
ENSMUSG00000028653.15	Trit1	0.000105556	0.00166957	1	0.254	0.746	chr4	+	SE	exonStart_0base 123046874 exonEnd 123047017 upstreamES 123044490 upstreamEE 123044636 downstreamES 123048768 downstreamEE 123048880	https://betsholtzlab.org/Publications/MouseKidenyOB/splicing/GE_Lean_6w_vs_GE_Obese_6w/SE/98_Trit1_chr4_123044491_123044636_+@chr4_123046875_123047017_+@chr4_123048769_123048880_+.pdf	Online figure
ENSMUSG00000028653.15	Trit1	1.74793e-05	0.000516265	1	0.131	0.869	chr4	+	SE	exonStart_0base 123049151 exonEnd 123049264 upstreamES 123048768 upstreamEE 123048880 downstreamES 123049476 downstreamEE 123049554	https://betsholtzlab.org/Publications/MouseKidenyOB/splicing/GE_Lean_6w_vs_GE_Obese_6w/SE/99_Trit1_chr4_123048769_123048880_+@chr4_123049152_123049264_+@chr4_123049477_123049554_+.pdf	Online figure
ENSMUSG00000041199.2	Rpusd1	0.000114334	0.00177448	0.694	0	0.694	chr17	+	SE	exonStart_0base 25728202 exonEnd 25728391 upstreamES 25727750 upstreamEE 25727847 downstreamES 25728522 downstreamEE 25728646	https://betsholtzlab.org/Publications/MouseKidenyOB/splicing/GE_Lean_6w_vs_GE_Obese_6w/SE/100_Rpusd1_chr17_25727751_25727847_+@chr17_25728203_25728391_+@chr17_25728523_25728646_+.pdf	Online figure
ENSMUSG00000054580.13	Pla2r1	0.000894569	0.00823316	0.122	1	-0.878	chr2	-	SE	exonStart_0base 60455085 exonEnd 60455231 upstreamES 60452401 upstreamEE 60452486 downstreamES 60458249 downstreamEE 60458452	https://betsholtzlab.org/Publications/MouseKidenyOB/splicing/GE_Lean_6w_vs_GE_Obese_6w/SE/101_Pla2r1_chr2_60458250_60458452_-@chr2_60455086_60455231_-@chr2_60452402_60452486_-.pdf	Online figure
ENSMUSG00000031565.16	Fgfr1	0.00599923	0.0332923	0	0.408	-0.408	chr8	+	SE	exonStart_0base 25555468 exonEnd 25555774 upstreamES 25532249 upstreamEE 25532428 downstreamES 25557730 downstreamEE 25557814	https://betsholtzlab.org/Publications/MouseKidenyOB/splicing/GE_Lean_6w_vs_GE_Obese_6w/SE/102_Fgfr1_chr8_25532250_25532428_+@chr8_25555469_25555774_+@chr8_25557731_25557814_+.pdf	Online figure
ENSMUSG00000031565.16	Fgfr1	0.00468401	0.0283341	0	0.437	-0.437	chr8	+	SE	exonStart_0base 25555507 exonEnd 25555774 upstreamES 25532249 upstreamEE 25532428 downstreamES 25557730 downstreamEE 25557814	https://betsholtzlab.org/Publications/MouseKidenyOB/splicing/GE_Lean_6w_vs_GE_Obese_6w/SE/103_Fgfr1_chr8_25532250_25532428_+@chr8_25555508_25555774_+@chr8_25557731_25557814_+.pdf	Online figure
ENSMUSG00000020474.10	Polm	4.35571e-05	0.000882285	0	1	-1	chr11	-	SE	exonStart_0base 5837288 exonEnd 5837478 upstreamES 5836277 upstreamEE 5836374 downstreamES 5837560 downstreamEE 5837752	https://betsholtzlab.org/Publications/MouseKidenyOB/splicing/GE_Lean_6w_vs_GE_Obese_6w/SE/104_Polm_chr11_5837561_5837752_-@chr11_5837289_5837478_-@chr11_5836278_5836374_-.pdf	Online figure
ENSMUSG00000007812.15	Zfp655	0.000298829	0.00369641	0.183	0.638	-0.455	chr5	+	SE	exonStart_0base 145235305 exonEnd 145235391 upstreamES 145233440 upstreamEE 145233602 downstreamES 145242919 downstreamEE 145243024	https://betsholtzlab.org/Publications/MouseKidenyOB/splicing/GE_Lean_6w_vs_GE_Obese_6w/SE/105_Zfp655_chr5_145233441_145233602_+@chr5_145235306_145235391_+@chr5_145242920_145243024_+.pdf	Online figure
ENSMUSG00000073771.10	Btbd19	0.0019774	0.0147311	0.351	1	-0.649	chr4	-	SE	exonStart_0base 117121197 exonEnd 117121329 upstreamES 117119218 upstreamEE 117120861 downstreamES 117121413 downstreamEE 117121482	https://betsholtzlab.org/Publications/MouseKidenyOB/splicing/GE_Lean_6w_vs_GE_Obese_6w/SE/106_Btbd19_chr4_117121414_117121482_-@chr4_117121198_117121329_-@chr4_117119219_117120861_-.pdf	Online figure
ENSMUSG00000073771.10	Btbd19	0.00261199	0.0181522	0.882	0.172	0.71	chr4	-	SE	exonStart_0base 117121413 exonEnd 117121482 upstreamES 117121197 upstreamEE 117121329 downstreamES 117122218 downstreamEE 117122278	https://betsholtzlab.org/Publications/MouseKidenyOB/splicing/GE_Lean_6w_vs_GE_Obese_6w/SE/107_Btbd19_chr4_117122219_117122278_-@chr4_117121414_117121482_-@chr4_117121198_117121329_-.pdf	Online figure
ENSMUSG00000073771.10	Btbd19	4.77795e-06	0.00024696	1	0	1	chr4	-	SE	exonStart_0base 117123938 exonEnd 117124140 upstreamES 117123728 upstreamEE 117123782 downstreamES 117125328 downstreamEE 117125618	https://betsholtzlab.org/Publications/MouseKidenyOB/splicing/GE_Lean_6w_vs_GE_Obese_6w/SE/108_Btbd19_chr4_117125329_117125618_-@chr4_117123939_117124140_-@chr4_117123729_117123782_-.pdf	Online figure
ENSMUSG00000020630.8	Rnaseh1	2.21541e-05	0.000593751	0.207	0.9	-0.693	chr12	+	SE	exonStart_0base 28657271 exonEnd 28657326 upstreamES 28655584 upstreamEE 28655684 downstreamES 28657632 downstreamEE 28657717	https://betsholtzlab.org/Publications/MouseKidenyOB/splicing/GE_Lean_6w_vs_GE_Obese_6w/SE/109_Rnaseh1_chr12_28655585_28655684_+@chr12_28657272_28657326_+@chr12_28657633_28657717_+.pdf	Online figure
ENSMUSG00000085399.6	Foxd2os	5.31406e-06	0.000267505	1	0	1	chr4	+	SE	exonStart_0base 114921059 exonEnd 114921235 upstreamES 114920439 upstreamEE 114920555 downstreamES 114921768 downstreamEE 114921967	https://betsholtzlab.org/Publications/MouseKidenyOB/splicing/GE_Lean_6w_vs_GE_Obese_6w/SE/110_Foxd2os_chr4_114920440_114920555_+@chr4_114921060_114921235_+@chr4_114921769_114921967_+.pdf	Online figure
ENSMUSG00000025278.8	Flnb	0.000646851	0.0064674	0.332	1	-0.668	chr14	+	SE	exonStart_0base 7873344 exonEnd 7873492 upstreamES 7869779 upstreamEE 7869877 downstreamES 7881582 downstreamEE 7881701	https://betsholtzlab.org/Publications/MouseKidenyOB/splicing/GE_Lean_6w_vs_GE_Obese_6w/SE/111_Flnb_chr14_7869780_7869877_+@chr14_7873345_7873492_+@chr14_7881583_7881701_+.pdf	Online figure
ENSMUSG00000025278.8	Flnb	0.000638427	0.00643401	1	0.327	0.673	chr14	+	SE	exonStart_0base 7922674 exonEnd 7922746 upstreamES 7919109 upstreamEE 7919357 downstreamES 7923454 downstreamEE 7923557	https://betsholtzlab.org/Publications/MouseKidenyOB/splicing/GE_Lean_6w_vs_GE_Obese_6w/SE/112_Flnb_chr14_7919110_7919357_+@chr14_7922675_7922746_+@chr14_7923455_7923557_+.pdf	Online figure
ENSMUSG00000028521.16	Slc35d1	0.00950656	0.0462078	0.244	1	-0.756	chr4	-	SE	exonStart_0base 103208109 exonEnd 103208212 upstreamES 103205105 upstreamEE 103205198 downstreamES 103210528 downstreamEE 103210597	https://betsholtzlab.org/Publications/MouseKidenyOB/splicing/GE_Lean_6w_vs_GE_Obese_6w/SE/113_Slc35d1_chr4_103210529_103210597_-@chr4_103208110_103208212_-@chr4_103205106_103205198_-.pdf	Online figure
ENSMUSG00000028522.15	Mier1	0.00884524	0.0439529	0.7	0.104	0.596	chr4	+	SE	exonStart_0base 103118280 exonEnd 103118315 upstreamES 103115559 upstreamEE 103115660 downstreamES 103127272 downstreamEE 103127297	https://betsholtzlab.org/Publications/MouseKidenyOB/splicing/GE_Lean_6w_vs_GE_Obese_6w/SE/114_Mier1_chr4_103115560_103115660_+@chr4_103118281_103118315_+@chr4_103127273_103127297_+.pdf	Online figure
ENSMUSG00000037395.14	Rcor3	0.00850796	0.042606	0.336	0.771	-0.435	chr1	-	SE	exonStart_0base 192101625 exonEnd 192101867 upstreamES 192100583 upstreamEE 192101155 downstreamES 192108643 downstreamEE 192108701	https://betsholtzlab.org/Publications/MouseKidenyOB/splicing/GE_Lean_6w_vs_GE_Obese_6w/SE/115_Rcor3_chr1_192108644_192108701_-@chr1_192101626_192101867_-@chr1_192100584_192101155_-.pdf	Online figure
ENSMUSG00000037395.14	Rcor3	0.000904089	0.00828129	1	0.566	0.434	chr1	-	SE	exonStart_0base 192101625 exonEnd 192101867 upstreamES 192100583 upstreamEE 192101155 downstreamES 192116268 downstreamEE 192116346	https://betsholtzlab.org/Publications/MouseKidenyOB/splicing/GE_Lean_6w_vs_GE_Obese_6w/SE/116_Rcor3_chr1_192116269_192116346_-@chr1_192101626_192101867_-@chr1_192100584_192101155_-.pdf	Online figure
ENSMUSG00000037395.14	Rcor3	0.00160359	0.0126008	0.229	0.774	-0.545	chr1	-	SE	exonStart_0base 192101751 exonEnd 192101867 upstreamES 192100906 upstreamEE 192101155 downstreamES 192108643 downstreamEE 192108701	https://betsholtzlab.org/Publications/MouseKidenyOB/splicing/GE_Lean_6w_vs_GE_Obese_6w/SE/117_Rcor3_chr1_192108644_192108701_-@chr1_192101752_192101867_-@chr1_192100907_192101155_-.pdf	Online figure
ENSMUSG00000037395.14	Rcor3	0.000323564	0.00392685	1	0.507	0.493	chr1	-	SE	exonStart_0base 192108643 exonEnd 192108701 upstreamES 192098545 upstreamEE 192101155 downstreamES 192116268 downstreamEE 192116346	https://betsholtzlab.org/Publications/MouseKidenyOB/splicing/GE_Lean_6w_vs_GE_Obese_6w/SE/118_Rcor3_chr1_192116269_192116346_-@chr1_192108644_192108701_-@chr1_192098546_192101155_-.pdf	Online figure
ENSMUSG00000028565.17	Nfia	5.20002e-05	0.000993495	0	1	-1	chr4	+	SE	exonStart_0base 98041550 exonEnd 98041679 upstreamES 98020826 upstreamEE 98020954 downstreamES 98063012 downstreamEE 98063191	https://betsholtzlab.org/Publications/MouseKidenyOB/splicing/GE_Lean_6w_vs_GE_Obese_6w/SE/119_Nfia_chr4_98020827_98020954_+@chr4_98041551_98041679_+@chr4_98063013_98063191_+.pdf	Online figure
ENSMUSG00000028483.12	Snapc3	0.000687238	0.00672031	1	0.358	0.642	chr4	+	SE	exonStart_0base 83460162 exonEnd 83460359 upstreamES 83453805 upstreamEE 83454148 downstreamES 83465964 downstreamEE 83466137	https://betsholtzlab.org/Publications/MouseKidenyOB/splicing/GE_Lean_6w_vs_GE_Obese_6w/SE/120_Snapc3_chr4_83453806_83454148_+@chr4_83460163_83460359_+@chr4_83465965_83466137_+.pdf	Online figure
ENSMUSG00000022092.10	Ppp3cc	2.67509e-05	0.000685225	1	0	1	chr14	-	SE	exonStart_0base 70220016 exonEnd 70220046 upstreamES 70217897 upstreamEE 70218277 downstreamES 70224309 downstreamEE 70224407	https://betsholtzlab.org/Publications/MouseKidenyOB/splicing/GE_Lean_6w_vs_GE_Obese_6w/SE/121_Ppp3cc_chr14_70224310_70224407_-@chr14_70220017_70220046_-@chr14_70217898_70218277_-.pdf	Online figure
ENSMUSG00000032534.15	Cep63	1.78508e-05	0.000519288	0	1	-1	chr9	-	SE	exonStart_0base 102623555 exonEnd 102623593 upstreamES 102621695 upstreamEE 102621728 downstreamES 102625903 downstreamEE 102626023	https://betsholtzlab.org/Publications/MouseKidenyOB/splicing/GE_Lean_6w_vs_GE_Obese_6w/SE/122_Cep63_chr9_102625904_102626023_-@chr9_102623556_102623593_-@chr9_102621696_102621728_-.pdf	Online figure
ENSMUSG00000032423.11	Syncrip	0.00448513	0.0274123	0.231	1	-0.769	chr9	-	SE	exonStart_0base 88477073 exonEnd 88477187 upstreamES 88476788 upstreamEE 88476965 downstreamES 88479570 downstreamEE 88479678	https://betsholtzlab.org/Publications/MouseKidenyOB/splicing/GE_Lean_6w_vs_GE_Obese_6w/SE/123_Syncrip_chr9_88479571_88479678_-@chr9_88477074_88477187_-@chr9_88476789_88476965_-.pdf	Online figure
ENSMUSG00000032423.11	Syncrip	0.0061073	0.0335756	0.263	1	-0.737	chr9	-	SE	exonStart_0base 88477099 exonEnd 88477187 upstreamES 88476788 upstreamEE 88476965 downstreamES 88479570 downstreamEE 88479678	https://betsholtzlab.org/Publications/MouseKidenyOB/splicing/GE_Lean_6w_vs_GE_Obese_6w/SE/124_Syncrip_chr9_88479571_88479678_-@chr9_88477100_88477187_-@chr9_88476789_88476965_-.pdf	Online figure
ENSMUSG00000026853.14	Crat	1.05181e-05	0.000387828	0	1	-1	chr2	-	SE	exonStart_0base 30413859 exonEnd 30413996 upstreamES 30412982 upstreamEE 30413246 downstreamES 30415194 downstreamEE 30415308	https://betsholtzlab.org/Publications/MouseKidenyOB/splicing/GE_Lean_6w_vs_GE_Obese_6w/SE/125_Crat_chr2_30415195_30415308_-@chr2_30413860_30413996_-@chr2_30412983_30413246_-.pdf	Online figure
ENSMUSG00000059142.14	Zfp945	0.000686768	0.00672031	0.866	0.414	0.452	chr17	-	SE	exonStart_0base 22861731 exonEnd 22861852 upstreamES 22861505 upstreamEE 22861561 downstreamES 22865246 downstreamEE 22865336	https://betsholtzlab.org/Publications/MouseKidenyOB/splicing/GE_Lean_6w_vs_GE_Obese_6w/SE/126_Zfp945_chr17_22865247_22865336_-@chr17_22861732_22861852_-@chr17_22861506_22861561_-.pdf	Online figure
ENSMUSG00000028414.15	Fktn	9.53635e-08	2.40026e-05	0	0.702	-0.702	chr4	+	SE	exonStart_0base 53724604 exonEnd 53724742 upstreamES 53720006 upstreamEE 53720209 downstreamES 53729979 downstreamEE 53730039	https://betsholtzlab.org/Publications/MouseKidenyOB/splicing/GE_Lean_6w_vs_GE_Obese_6w/SE/127_Fktn_chr4_53720007_53720209_+@chr4_53724605_53724742_+@chr4_53729980_53730039_+.pdf	Online figure
ENSMUSG00000028414.15	Fktn	1.78244e-09	1.47408e-06	0.754	0	0.754	chr4	+	SE	exonStart_0base 53742495 exonEnd 53742766 upstreamES 53737526 upstreamEE 53737659 downstreamES 53744618 downstreamEE 53744748	https://betsholtzlab.org/Publications/MouseKidenyOB/splicing/GE_Lean_6w_vs_GE_Obese_6w/SE/128_Fktn_chr4_53737527_53737659_+@chr4_53742496_53742766_+@chr4_53744619_53744748_+.pdf	Online figure
ENSMUSG00000034101.13	Ctnnd1	1.03203e-06	8.88903e-05	0.234	0.766	-0.532	chr2	-	SE	exonStart_0base 84605183 exonEnd 84605246 upstreamES 84603648 upstreamEE 84603752 downstreamES 84608328 downstreamEE 84608416	https://betsholtzlab.org/Publications/MouseKidenyOB/splicing/GE_Lean_6w_vs_GE_Obese_6w/SE/129_Ctnnd1_chr2_84608329_84608416_-@chr2_84605184_84605246_-@chr2_84603649_84603752_-.pdf	Online figure
ENSMUSG00000039813.13	Tbc1d2	0.000391262	0.00451198	0.339	1	-0.661	chr4	-	SE	exonStart_0base 46646116 exonEnd 46646258 upstreamES 46637588 upstreamEE 46637736 downstreamES 46649668 downstreamEE 46650209	https://betsholtzlab.org/Publications/MouseKidenyOB/splicing/GE_Lean_6w_vs_GE_Obese_6w/SE/130_Tbc1d2_chr4_46649669_46650209_-@chr4_46646117_46646258_-@chr4_46637589_46637736_-.pdf	Online figure
ENSMUSG00000025332.13	Kdm5c	0.0036661	0.0236337	0.461	1	-0.539	chrX	+	SE	exonStart_0base 152239629 exonEnd 152239752 upstreamES 152237632 upstreamEE 152237710 downstreamES 152240025 downstreamEE 152240196	https://betsholtzlab.org/Publications/MouseKidenyOB/splicing/GE_Lean_6w_vs_GE_Obese_6w/SE/131_Kdm5c_chrX_152237633_152237710_+@chrX_152239630_152239752_+@chrX_152240026_152240196_+.pdf	Online figure
ENSMUSG00000025332.13	Kdm5c	6.03924e-06	0.00028003	0	1	-1	chrX	+	SE	exonStart_0base 152269714 exonEnd 152269853 upstreamES 152268764 upstreamEE 152269123 downstreamES 152270351 downstreamEE 152270531	https://betsholtzlab.org/Publications/MouseKidenyOB/splicing/GE_Lean_6w_vs_GE_Obese_6w/SE/132_Kdm5c_chrX_152268765_152269123_+@chrX_152269715_152269853_+@chrX_152270352_152270531_+.pdf	Online figure
ENSMUSG00000025332.13	Kdm5c	0.000210869	0.0028323	0	0.852	-0.852	chrX	+	SE	exonStart_0base 152270693 exonEnd 152270831 upstreamES 152270351 upstreamEE 152270531 downstreamES 152271011 downstreamEE 152271593	https://betsholtzlab.org/Publications/MouseKidenyOB/splicing/GE_Lean_6w_vs_GE_Obese_6w/SE/133_Kdm5c_chrX_152270352_152270531_+@chrX_152270694_152270831_+@chrX_152271012_152271593_+.pdf	Online figure
ENSMUSG00000021514.16	Zfp369	0.000137848	0.00206202	0.202	1	-0.798	chr13	+	SE	exonStart_0base 65279260 exonEnd 65279340 upstreamES 65278813 upstreamEE 65278987 downstreamES 65280261 downstreamEE 65280388	https://betsholtzlab.org/Publications/MouseKidenyOB/splicing/GE_Lean_6w_vs_GE_Obese_6w/SE/134_Zfp369_chr13_65278814_65278987_+@chr13_65279261_65279340_+@chr13_65280262_65280388_+.pdf	Online figure
ENSMUSG00000021514.16	Zfp369	1.39883e-05	0.000460188	1	0	1	chr13	+	SE	exonStart_0base 65284920 exonEnd 65285016 upstreamES 65280261 upstreamEE 65280388 downstreamES 65291822 downstreamEE 65292305	https://betsholtzlab.org/Publications/MouseKidenyOB/splicing/GE_Lean_6w_vs_GE_Obese_6w/SE/135_Zfp369_chr13_65280262_65280388_+@chr13_65284921_65285016_+@chr13_65291823_65292305_+.pdf	Online figure
ENSMUSG00000035969.14	Rusc2	4.4594e-05	0.00088713	0	1	-1	chr4	+	SE	exonStart_0base 43413004 exonEnd 43413054 upstreamES 43383509 upstreamEE 43383759 downstreamES 43414627 downstreamEE 43414755	https://betsholtzlab.org/Publications/MouseKidenyOB/splicing/GE_Lean_6w_vs_GE_Obese_6w/SE/136_Rusc2_chr4_43383510_43383759_+@chr4_43413005_43413054_+@chr4_43414628_43414755_+.pdf	Online figure
ENSMUSG00000032217.11	Rnf111	3.05227e-05	0.000707858	1	0	1	chr9	-	SE	exonStart_0base 70502939 exonEnd 70503002 upstreamES 70475775 upstreamEE 70476668 downstreamES 70503458 downstreamEE 70503725	https://betsholtzlab.org/Publications/MouseKidenyOB/splicing/GE_Lean_6w_vs_GE_Obese_6w/SE/137_Rnf111_chr9_70503459_70503725_-@chr9_70502940_70503002_-@chr9_70475776_70476668_-.pdf	Online figure
ENSMUSG00000056692.11	D17Wsu92e	0.000643002	0.00646063	0.327	1	-0.673	chr17	-	SE	exonStart_0base 27767910 exonEnd 27768239 upstreamES 27751231 upstreamEE 27753995 downstreamES 27786070 downstreamEE 27786268	https://betsholtzlab.org/Publications/MouseKidenyOB/splicing/GE_Lean_6w_vs_GE_Obese_6w/SE/138_D17Wsu92e_chr17_27786071_27786268_-@chr17_27767911_27768239_-@chr17_27751232_27753995_-.pdf	Online figure
ENSMUSG00000056692.11	D17Wsu92e	0.000382832	0.00445776	0.243	1	-0.757	chr17	-	SE	exonStart_0base 27768135 exonEnd 27768239 upstreamES 27751245 upstreamEE 27753995 downstreamES 27786070 downstreamEE 27786268	https://betsholtzlab.org/Publications/MouseKidenyOB/splicing/GE_Lean_6w_vs_GE_Obese_6w/SE/139_D17Wsu92e_chr17_27786071_27786268_-@chr17_27768136_27768239_-@chr17_27751246_27753995_-.pdf	Online figure
ENSMUSG00000025578.9	Cbx8	0.00135128	0.0112232	0.533	1	-0.467	chr11	-	SE	exonStart_0base 119040347 exonEnd 119040391 upstreamES 119039931 upstreamEE 119040159 downstreamES 119040781 downstreamEE 119040831	https://betsholtzlab.org/Publications/MouseKidenyOB/splicing/GE_Lean_6w_vs_GE_Obese_6w/SE/140_Cbx8_chr11_119040782_119040831_-@chr11_119040348_119040391_-@chr11_119039932_119040159_-.pdf	Online figure
ENSMUSG00000028278.13	Rragd	5.7088e-06	0.00027396	0	1	-1	chr4	+	SE	exonStart_0base 32995031 exonEnd 32995196 upstreamES 32983154 upstreamEE 32983607 downstreamES 32995801 downstreamEE 32996097	https://betsholtzlab.org/Publications/MouseKidenyOB/splicing/GE_Lean_6w_vs_GE_Obese_6w/SE/141_Rragd_chr4_32983155_32983607_+@chr4_32995032_32995196_+@chr4_32995802_32996097_+.pdf	Online figure
ENSMUSG00000040410.13	Fbxl4	0.000287417	0.00358589	0.202	1	-0.798	chr4	+	SE	exonStart_0base 22422716 exonEnd 22423927 upstreamES 22403531 upstreamEE 22403745 downstreamES 22427149 downstreamEE 22427462	https://betsholtzlab.org/Publications/MouseKidenyOB/splicing/GE_Lean_6w_vs_GE_Obese_6w/SE/142_Fbxl4_chr4_22403532_22403745_+@chr4_22422717_22423927_+@chr4_22427150_22427462_+.pdf	Online figure
ENSMUSG00000029141.15	Slc4a1ap	0.000122185	0.0018663	1	0.419	0.581	chr5	+	SE	exonStart_0base 31546179 exonEnd 31546266 upstreamES 31543669 upstreamEE 31543913 downstreamES 31548610 downstreamEE 31548681	https://betsholtzlab.org/Publications/MouseKidenyOB/splicing/GE_Lean_6w_vs_GE_Obese_6w/SE/143_Slc4a1ap_chr5_31543670_31543913_+@chr5_31546180_31546266_+@chr5_31548611_31548681_+.pdf	Online figure
ENSMUSG00000061755.9	Bod1l	8.34175e-06	0.000338327	0.674	0	0.674	chr5	-	SE	exonStart_0base 41791796 exonEnd 41791937 upstreamES 41787537 upstreamEE 41788949 downstreamES 41794226 downstreamEE 41794380	https://betsholtzlab.org/Publications/MouseKidenyOB/splicing/GE_Lean_6w_vs_GE_Obese_6w/SE/144_Bod1l_chr5_41794227_41794380_-@chr5_41791797_41791937_-@chr5_41787538_41788949_-.pdf	Online figure
ENSMUSG00000033985.16	Tesk2	1.63215e-05	0.000507204	0	1	-1	chr4	+	SE	exonStart_0base 116724625 exonEnd 116724707 upstreamES 116720968 upstreamEE 116721256 downstreamES 116741615 downstreamEE 116741918	https://betsholtzlab.org/Publications/MouseKidenyOB/splicing/GE_Lean_6w_vs_GE_Obese_6w/SE/145_Tesk2_chr4_116720969_116721256_+@chr4_116724626_116724707_+@chr4_116741616_116741918_+.pdf	Online figure
ENSMUSG00000041997.15	Tlk1	2.71231e-05	0.000689129	1	0	1	chr2	-	SE	exonStart_0base 70731813 exonEnd 70732066 upstreamES 70725479 upstreamEE 70725577 downstreamES 70738420 downstreamEE 70738487	https://betsholtzlab.org/Publications/MouseKidenyOB/splicing/GE_Lean_6w_vs_GE_Obese_6w/SE/146_Tlk1_chr2_70738421_70738487_-@chr2_70731814_70732066_-@chr2_70725480_70725577_-.pdf	Online figure
ENSMUSG00000029722.14	Agfg2	2.72703e-05	0.000689379	1	0	1	chr5	-	SE	exonStart_0base 137660161 exonEnd 137660194 upstreamES 137655607 upstreamEE 137655728 downstreamES 137661363 downstreamEE 137661489	https://betsholtzlab.org/Publications/MouseKidenyOB/splicing/GE_Lean_6w_vs_GE_Obese_6w/SE/147_Agfg2_chr5_137661364_137661489_-@chr5_137660162_137660194_-@chr5_137655608_137655728_-.pdf	Online figure
ENSMUSG00000068250.12	Amn1	0.0034546	0.0225464	1	0.394	0.606	chr6	-	SE	exonStart_0base 149169302 exonEnd 149169404 upstreamES 149166805 upstreamEE 149166917 downstreamES 149170832 downstreamEE 149171050	https://betsholtzlab.org/Publications/MouseKidenyOB/splicing/GE_Lean_6w_vs_GE_Obese_6w/SE/148_Amn1_chr6_149170833_149171050_-@chr6_149169303_149169404_-@chr6_149166806_149166917_-.pdf	Online figure
ENSMUSG00000035236.16	Scai	0.00194897	0.014577	0.535	1	-0.465	chr2	-	SE	exonStart_0base 39102320 exonEnd 39102399 upstreamES 39099375 upstreamEE 39099475 downstreamES 39103202 downstreamEE 39103304	https://betsholtzlab.org/Publications/MouseKidenyOB/splicing/GE_Lean_6w_vs_GE_Obese_6w/SE/149_Scai_chr2_39103203_39103304_-@chr2_39102321_39102399_-@chr2_39099376_39099475_-.pdf	Online figure
ENSMUSG00000035236.16	Scai	0.0013584	0.0112662	0.608	0	0.608	chr2	-	SE	exonStart_0base 39150313 exonEnd 39150414 upstreamES 39132954 upstreamEE 39133086 downstreamES 39189988 downstreamEE 39190033	https://betsholtzlab.org/Publications/MouseKidenyOB/splicing/GE_Lean_6w_vs_GE_Obese_6w/SE/150_Scai_chr2_39189989_39190033_-@chr2_39150314_39150414_-@chr2_39132955_39133086_-.pdf	Online figure
ENSMUSG00000030779.14	Rbbp6	1.82659e-06	0.000130545	0.869	0.098	0.771	chr7	+	SE	exonStart_0base 122997595 exonEnd 122997697 upstreamES 122996942 upstreamEE 122997305 downstreamES 122998524 downstreamEE 123000279	https://betsholtzlab.org/Publications/MouseKidenyOB/splicing/GE_Lean_6w_vs_GE_Obese_6w/SE/151_Rbbp6_chr7_122996943_122997305_+@chr7_122997596_122997697_+@chr7_122998525_123000279_+.pdf	Online figure
ENSMUSG00000056153.13	Socs6	0.00187631	0.0141801	1	0.543	0.457	chr18	-	SE	exonStart_0base 88886991 exonEnd 88887052 upstreamES 88870249 upstreamEE 88870918 downstreamES 88887208 downstreamEE 88887247	https://betsholtzlab.org/Publications/MouseKidenyOB/splicing/GE_Lean_6w_vs_GE_Obese_6w/SE/152_Socs6_chr18_88887209_88887247_-@chr18_88886992_88887052_-@chr18_88870250_88870918_-.pdf	Online figure
ENSMUSG00000056153.13	Socs6	0.0014932	0.0119065	1	0.515	0.485	chr18	-	SE	exonStart_0base 88886991 exonEnd 88887065 upstreamES 88868494 upstreamEE 88870918 downstreamES 88887208 downstreamEE 88887333	https://betsholtzlab.org/Publications/MouseKidenyOB/splicing/GE_Lean_6w_vs_GE_Obese_6w/SE/153_Socs6_chr18_88887209_88887333_-@chr18_88886992_88887065_-@chr18_88868495_88870918_-.pdf	Online figure
ENSMUSG00000024155.7	Meiob	3.81457e-09	2.45361e-06	0.057	1	-0.943	chr17	+	SE	exonStart_0base 24836435 exonEnd 24836522 upstreamES 24834991 upstreamEE 24835175 downstreamES 24839426 downstreamEE 24839787	https://betsholtzlab.org/Publications/MouseKidenyOB/splicing/GE_Lean_6w_vs_GE_Obese_6w/SE/154_Meiob_chr17_24834992_24835175_+@chr17_24836436_24836522_+@chr17_24839427_24839787_+.pdf	Online figure
ENSMUSG00000056698.10	Elmod3	0.00585585	0.0327848	1	0.479	0.521	chr6	-	SE	exonStart_0base 72596435 exonEnd 72596466 upstreamES 72594739 upstreamEE 72595020 downstreamES 72597623 downstreamEE 72597645	https://betsholtzlab.org/Publications/MouseKidenyOB/splicing/GE_Lean_6w_vs_GE_Obese_6w/SE/155_Elmod3_chr6_72597624_72597645_-@chr6_72596436_72596466_-@chr6_72594740_72595020_-.pdf	Online figure
ENSMUSG00000052062.13	Pard3b	0.00602992	0.0333402	0.262	1	-0.738	chr1	+	SE	exonStart_0base 62144846 exonEnd 62144935 upstreamES 62076384 upstreamEE 62076494 downstreamES 62153932 downstreamEE 62154019	https://betsholtzlab.org/Publications/MouseKidenyOB/splicing/GE_Lean_6w_vs_GE_Obese_6w/SE/156_Pard3b_chr1_62076385_62076494_+@chr1_62144847_62144935_+@chr1_62153933_62154019_+.pdf	Online figure
ENSMUSG00000030047.13	Arhgap25	0.00233072	0.0167194	1	0.582	0.418	chr6	-	SE	exonStart_0base 87466009 exonEnd 87466594 upstreamES 87465500 upstreamEE 87465697 downstreamES 87467912 downstreamEE 87467986	https://betsholtzlab.org/Publications/MouseKidenyOB/splicing/GE_Lean_6w_vs_GE_Obese_6w/SE/157_Arhgap25_chr6_87467913_87467986_-@chr6_87466010_87466594_-@chr6_87465501_87465697_-.pdf	Online figure
ENSMUSG00000025607.14	Copg2	0.000883414	0.00816947	1	0.407	0.593	chr6	-	SE	exonStart_0base 30863534 exonEnd 30863610 upstreamES 30861367 upstreamEE 30861460 downstreamES 30885579 downstreamEE 30885659	https://betsholtzlab.org/Publications/MouseKidenyOB/splicing/GE_Lean_6w_vs_GE_Obese_6w/SE/158_Copg2_chr6_30885580_30885659_-@chr6_30863535_30863610_-@chr6_30861368_30861460_-.pdf	Online figure
ENSMUSG00000063889.15	Crem	1.07682e-05	0.000391729	0.536	0.114	0.422	chr18	-	SE	exonStart_0base 3276693 exonEnd 3276729 upstreamES 3273421 upstreamEE 3273578 downstreamES 3280948 downstreamEE 3281132	https://betsholtzlab.org/Publications/MouseKidenyOB/splicing/GE_Lean_6w_vs_GE_Obese_6w/SE/159_Crem_chr18_3280949_3281132_-@chr18_3276694_3276729_-@chr18_3273422_3273578_-.pdf	Online figure
ENSMUSG00000063889.15	Crem	0.00226939	0.0163809	1	0.366	0.634	chr18	-	SE	exonStart_0base 3276693 exonEnd 3276729 upstreamES 3273421 upstreamEE 3273578 downstreamES 3325360 downstreamEE 3325474	https://betsholtzlab.org/Publications/MouseKidenyOB/splicing/GE_Lean_6w_vs_GE_Obese_6w/SE/160_Crem_chr18_3325361_3325474_-@chr18_3276694_3276729_-@chr18_3273422_3273578_-.pdf	Online figure
ENSMUSG00000063889.15	Crem	0.005303	0.0306072	1	0.556	0.444	chr18	-	SE	exonStart_0base 3299161 exonEnd 3299308 upstreamES 3273421 upstreamEE 3273578 downstreamES 3325360 downstreamEE 3325474	https://betsholtzlab.org/Publications/MouseKidenyOB/splicing/GE_Lean_6w_vs_GE_Obese_6w/SE/161_Crem_chr18_3325361_3325474_-@chr18_3299162_3299308_-@chr18_3273422_3273578_-.pdf	Online figure
ENSMUSG00000063889.15	Crem	5.11695e-07	6.17054e-05	1	0	1	chr18	-	SE	exonStart_0base 3309645 exonEnd 3309755 upstreamES 3295321 upstreamEE 3295416 downstreamES 3325360 downstreamEE 3325478	https://betsholtzlab.org/Publications/MouseKidenyOB/splicing/GE_Lean_6w_vs_GE_Obese_6w/SE/162_Crem_chr18_3325361_3325478_-@chr18_3309646_3309755_-@chr18_3295322_3295416_-.pdf	Online figure
ENSMUSG00000063889.15	Crem	3.71854e-05	0.000791421	0	1	-1	chr18	-	SE	exonStart_0base 3309854 exonEnd 3309987 upstreamES 3309645 upstreamEE 3309755 downstreamES 3325360 downstreamEE 3325478	https://betsholtzlab.org/Publications/MouseKidenyOB/splicing/GE_Lean_6w_vs_GE_Obese_6w/SE/163_Crem_chr18_3325361_3325478_-@chr18_3309855_3309987_-@chr18_3309646_3309755_-.pdf	Online figure
ENSMUSG00000027394.12	Ttl	0.000421475	0.00477479	0.161	1	-0.839	chr2	+	SE	exonStart_0base 129068854 exonEnd 129068933 upstreamES 129065941 upstreamEE 129066303 downstreamES 129075855 downstreamEE 129076088	https://betsholtzlab.org/Publications/MouseKidenyOB/splicing/GE_Lean_6w_vs_GE_Obese_6w/SE/164_Ttl_chr2_129065942_129066303_+@chr2_129068855_129068933_+@chr2_129075856_129076088_+.pdf	Online figure
ENSMUSG00000027109.15	Sp3	0.00112327	0.0097162	0.501	1	-0.499	chr2	-	SE	exonStart_0base 72979486 exonEnd 72979632 upstreamES 72970154 upstreamEE 72971514 downstreamES 72980249 downstreamEE 72980426	https://betsholtzlab.org/Publications/MouseKidenyOB/splicing/GE_Lean_6w_vs_GE_Obese_6w/SE/165_Sp3_chr2_72980250_72980426_-@chr2_72979487_72979632_-@chr2_72970155_72971514_-.pdf	Online figure
ENSMUSG00000039844.18	Rapgef1	0.00427738	0.0264832	0.474	1	-0.526	chr2	+	SE	exonStart_0base 29679736 exonEnd 29679850 upstreamES 29679132 upstreamEE 29679269 downstreamES 29686104 downstreamEE 29686283	https://betsholtzlab.org/Publications/MouseKidenyOB/splicing/GE_Lean_6w_vs_GE_Obese_6w/SE/166_Rapgef1_chr2_29679133_29679269_+@chr2_29679737_29679850_+@chr2_29686105_29686283_+.pdf	Online figure
ENSMUSG00000035513.18	Ntng2	5.54469e-06	0.000272019	1	0	1	chr2	-	SE	exonStart_0base 29203870 exonEnd 29204008 upstreamES 29200675 upstreamEE 29200948 downstreamES 29204897 downstreamEE 29204922	https://betsholtzlab.org/Publications/MouseKidenyOB/splicing/GE_Lean_6w_vs_GE_Obese_6w/SE/167_Ntng2_chr2_29204898_29204922_-@chr2_29203871_29204008_-@chr2_29200676_29200948_-.pdf	Online figure
ENSMUSG00000026930.14	Gpsm1	7.81859e-06	0.000330378	1	0	1	chr2	+	SE	exonStart_0base 26339635 exonEnd 26339706 upstreamES 26327291 upstreamEE 26327415 downstreamES 26344601 downstreamEE 26344758	https://betsholtzlab.org/Publications/MouseKidenyOB/splicing/GE_Lean_6w_vs_GE_Obese_6w/SE/168_Gpsm1_chr2_26327292_26327415_+@chr2_26339636_26339706_+@chr2_26344602_26344758_+.pdf	Online figure
ENSMUSG00000075376.9	Rc3h2	0.00115789	0.00995992	0.435	1	-0.565	chr2	-	SE	exonStart_0base 37419431 exonEnd 37419467 upstreamES 37414515 upstreamEE 37414812 downstreamES 37422766 downstreamEE 37422903	https://betsholtzlab.org/Publications/MouseKidenyOB/splicing/GE_Lean_6w_vs_GE_Obese_6w/SE/169_Rc3h2_chr2_37422767_37422903_-@chr2_37419432_37419467_-@chr2_37414516_37414812_-.pdf	Online figure
ENSMUSG00000070871.9	Ccnyl1	0.000173722	0.00248315	0.127	1	-0.873	chr1	+	SE	exonStart_0base 64702345 exonEnd 64702380 upstreamES 64700968 upstreamEE 64701043 downstreamES 64708377 downstreamEE 64708478	https://betsholtzlab.org/Publications/MouseKidenyOB/splicing/GE_Lean_6w_vs_GE_Obese_6w/SE/170_Ccnyl1_chr1_64700969_64701043_+@chr1_64702346_64702380_+@chr1_64708378_64708478_+.pdf	Online figure
ENSMUSG00000070871.9	Ccnyl1	0.00217292	0.0157435	0.634	0	0.634	chr1	+	SE	exonStart_0base 64711417 exonEnd 64711453 upstreamES 64708377 upstreamEE 64708478 downstreamES 64713110 downstreamEE 64713162	https://betsholtzlab.org/Publications/MouseKidenyOB/splicing/GE_Lean_6w_vs_GE_Obese_6w/SE/171_Ccnyl1_chr1_64708378_64708478_+@chr1_64711418_64711453_+@chr1_64713111_64713162_+.pdf	Online figure
ENSMUSG00000015095.11	Fbxw5	3.04121e-07	4.89043e-05	0.974	0.561	0.413	chr2	+	SE	exonStart_0base 25502400 exonEnd 25502558 upstreamES 25501935 upstreamEE 25502151 downstreamES 25502870 downstreamEE 25503045	https://betsholtzlab.org/Publications/MouseKidenyOB/splicing/GE_Lean_6w_vs_GE_Obese_6w/SE/172_Fbxw5_chr2_25501936_25502151_+@chr2_25502401_25502558_+@chr2_25502871_25503045_+.pdf	Online figure
ENSMUSG00000037270.16	4932438A13Rik	0.0098273	0.0472118	0.304	1	-0.696	chr3	+	SE	exonStart_0base 37022969 exonEnd 37023032 upstreamES 37022383 upstreamEE 37022474 downstreamES 37026089 downstreamEE 37026343	https://betsholtzlab.org/Publications/MouseKidenyOB/splicing/GE_Lean_6w_vs_GE_Obese_6w/SE/173_4932438A13Rik_chr3_37022384_37022474_+@chr3_37022970_37023032_+@chr3_37026090_37026343_+.pdf	Online figure
ENSMUSG00000053333.14	Dis3l2	0.00483805	0.0287551	0.522	1	-0.478	chr1	+	SE	exonStart_0base 86973399 exonEnd 86973507 upstreamES 86959742 upstreamEE 86959855 downstreamES 86990091 downstreamEE 86990325	https://betsholtzlab.org/Publications/MouseKidenyOB/splicing/GE_Lean_6w_vs_GE_Obese_6w/SE/174_Dis3l2_chr1_86959743_86959855_+@chr1_86973400_86973507_+@chr1_86990092_86990325_+.pdf	Online figure
ENSMUSG00000049624.12	Slc17a5	0.000571654	0.00598984	0.585	1	-0.415	chr9	-	SE	exonStart_0base 78574649 exonEnd 78574753 upstreamES 78571021 upstreamEE 78571108 downstreamES 78577029 downstreamEE 78577263	https://betsholtzlab.org/Publications/MouseKidenyOB/splicing/GE_Lean_6w_vs_GE_Obese_6w/SE/175_Slc17a5_chr9_78577030_78577263_-@chr9_78574650_78574753_-@chr9_78571022_78571108_-.pdf	Online figure
ENSMUSG00000020319.8	Wdpcp	2.42784e-06	0.00016535	0	1	-1	chr11	+	SE	exonStart_0base 21691769 exonEnd 21691903 upstreamES 21689567 upstreamEE 21689682 downstreamES 21695113 downstreamEE 21695305	https://betsholtzlab.org/Publications/MouseKidenyOB/splicing/GE_Lean_6w_vs_GE_Obese_6w/SE/176_Wdpcp_chr11_21689568_21689682_+@chr11_21691770_21691903_+@chr11_21695114_21695305_+.pdf	Online figure
ENSMUSG00000020319.8	Wdpcp	1.83721e-05	0.000525654	0	1	-1	chr11	+	SE	exonStart_0base 21691834 exonEnd 21691903 upstreamES 21689567 upstreamEE 21689682 downstreamES 21695113 downstreamEE 21697568	https://betsholtzlab.org/Publications/MouseKidenyOB/splicing/GE_Lean_6w_vs_GE_Obese_6w/SE/177_Wdpcp_chr11_21689568_21689682_+@chr11_21691835_21691903_+@chr11_21695114_21697568_+.pdf	Online figure
ENSMUSG00000026707.14	Nsun6	0.00174574	0.0134747	0.572	1	-0.428	chr2	-	SE	exonStart_0base 15039732 exonEnd 15039842 upstreamES 15038073 upstreamEE 15038227 downstreamES 15042226 downstreamEE 15042306	https://betsholtzlab.org/Publications/MouseKidenyOB/splicing/GE_Lean_6w_vs_GE_Obese_6w/SE/178_Nsun6_chr2_15042227_15042306_-@chr2_15039733_15039842_-@chr2_15038074_15038227_-.pdf	Online figure
ENSMUSG00000036052.13	Dnajb5	0.000543476	0.00577489	1	0.202	0.798	chr4	+	SE	exonStart_0base 42950798 exonEnd 42950943 upstreamES 42949813 upstreamEE 42950004 downstreamES 42953140 downstreamEE 42953385	https://betsholtzlab.org/Publications/MouseKidenyOB/splicing/GE_Lean_6w_vs_GE_Obese_6w/SE/179_Dnajb5_chr4_42949814_42950004_+@chr4_42950799_42950943_+@chr4_42953141_42953385_+.pdf	Online figure
ENSMUSG00000039069.18	Mtg2	0.000727361	0.00706492	0.521	1	-0.479	chr2	+	SE	exonStart_0base 180083344 exonEnd 180083460 upstreamES 180082085 upstreamEE 180082233 downstreamES 180084063 downstreamEE 180084282	https://betsholtzlab.org/Publications/MouseKidenyOB/splicing/GE_Lean_6w_vs_GE_Obese_6w/SE/180_Mtg2_chr2_180082086_180082233_+@chr2_180083345_180083460_+@chr2_180084064_180084282_+.pdf	Online figure
ENSMUSG00000029920.8	Smarcad1	2.8588e-06	0.000185951	0	0.721	-0.721	chr6	+	SE	exonStart_0base 65043835 exonEnd 65044108 upstreamES 65043205 upstreamEE 65043445 downstreamES 65052619 downstreamEE 65052749	https://betsholtzlab.org/Publications/MouseKidenyOB/splicing/GE_Lean_6w_vs_GE_Obese_6w/SE/181_Smarcad1_chr6_65043206_65043445_+@chr6_65043836_65044108_+@chr6_65052620_65052749_+.pdf	Online figure
ENSMUSG00000027999.14	Pla2g12a	0.00332862	0.0218473	0.681	0.073	0.608	chr3	+	SE	exonStart_0base 129893658 exonEnd 129893816 upstreamES 129890267 upstreamEE 129890433 downstreamES 129894837 downstreamEE 129894939	https://betsholtzlab.org/Publications/MouseKidenyOB/splicing/GE_Lean_6w_vs_GE_Obese_6w/SE/182_Pla2g12a_chr3_129890268_129890433_+@chr3_129893659_129893816_+@chr3_129894838_129894939_+.pdf	Online figure
ENSMUSG00000034842.15	Art3	0.00203028	0.0150298	0.435	0	0.435	chr5	+	SE	exonStart_0base 92405943 exonEnd 92405979 upstreamES 92404836 upstreamEE 92404866 downstreamES 92409269 downstreamEE 92409302	https://betsholtzlab.org/Publications/MouseKidenyOB/splicing/GE_Lean_6w_vs_GE_Obese_6w/SE/183_Art3_chr5_92404837_92404866_+@chr5_92405944_92405979_+@chr5_92409270_92409302_+.pdf	Online figure
ENSMUSG00000026005.14	Rpe	7.18903e-05	0.00125732	0	1	-1	chr1	+	SE	exonStart_0base 66701616 exonEnd 66701648 upstreamES 66700830 upstreamEE 66701017 downstreamES 66706445 downstreamEE 66706525	https://betsholtzlab.org/Publications/MouseKidenyOB/splicing/GE_Lean_6w_vs_GE_Obese_6w/SE/184_Rpe_chr1_66700831_66701017_+@chr1_66701617_66701648_+@chr1_66706446_66706525_+.pdf	Online figure
ENSMUSG00000037997.11	Parp11	6.91709e-06	0.000303356	0	1	-1	chr6	+	SE	exonStart_0base 127471547 exonEnd 127471668 upstreamES 127470701 upstreamEE 127470830 downstreamES 127474235 downstreamEE 127474311	https://betsholtzlab.org/Publications/MouseKidenyOB/splicing/GE_Lean_6w_vs_GE_Obese_6w/SE/185_Parp11_chr6_127470702_127470830_+@chr6_127471548_127471668_+@chr6_127474236_127474311_+.pdf	Online figure
ENSMUSG00000002546.15	Golga2	0.00206454	0.0151578	0	0.458	-0.458	chr2	+	SE	exonStart_0base 32296625 exonEnd 32296721 upstreamES 32292092 upstreamEE 32292215 downstreamES 32296964 downstreamEE 32297008	https://betsholtzlab.org/Publications/MouseKidenyOB/splicing/GE_Lean_6w_vs_GE_Obese_6w/SE/186_Golga2_chr2_32292093_32292215_+@chr2_32296626_32296721_+@chr2_32296965_32297008_+.pdf	Online figure
ENSMUSG00000002546.15	Golga2	0.00652624	0.0352429	1	0.485	0.515	chr2	+	SE	exonStart_0base 32297753 exonEnd 32297834 upstreamES 32297520 upstreamEE 32297577 downstreamES 32298599 downstreamEE 32298638	https://betsholtzlab.org/Publications/MouseKidenyOB/splicing/GE_Lean_6w_vs_GE_Obese_6w/SE/187_Golga2_chr2_32297521_32297577_+@chr2_32297754_32297834_+@chr2_32298600_32298638_+.pdf	Online figure
ENSMUSG00000026730.11	Pter	0.00242871	0.0171714	0.421	1	-0.579	chr2	+	SE	exonStart_0base 12978159 exonEnd 12978413 upstreamES 12924068 upstreamEE 12924198 downstreamES 12980292 downstreamEE 12980558	https://betsholtzlab.org/Publications/MouseKidenyOB/splicing/GE_Lean_6w_vs_GE_Obese_6w/SE/188_Pter_chr2_12924069_12924198_+@chr2_12978160_12978413_+@chr2_12980293_12980558_+.pdf	Online figure
ENSMUSG00000026730.11	Pter	0.00372485	0.0238531	0.491	1	-0.509	chr2	+	SE	exonStart_0base 12978159 exonEnd 12978617 upstreamES 12924091 upstreamEE 12924198 downstreamES 12980292 downstreamEE 12980558	https://betsholtzlab.org/Publications/MouseKidenyOB/splicing/GE_Lean_6w_vs_GE_Obese_6w/SE/189_Pter_chr2_12924092_12924198_+@chr2_12978160_12978617_+@chr2_12980293_12980558_+.pdf	Online figure
ENSMUSG00000057110.14	Cntrl	6.53587e-07	6.75645e-05	0	1	-1	chr2	+	SE	exonStart_0base 35133957 exonEnd 35134111 upstreamES 35129620 upstreamEE 35129815 downstreamES 35135467 downstreamEE 35135688	https://betsholtzlab.org/Publications/MouseKidenyOB/splicing/GE_Lean_6w_vs_GE_Obese_6w/SE/190_Cntrl_chr2_35129621_35129815_+@chr2_35133958_35134111_+@chr2_35135468_35135688_+.pdf	Online figure
ENSMUSG00000043987.16	Cep164	3.38482e-05	0.000734156	0	1	-1	chr9	-	SE	exonStart_0base 45781951 exonEnd 45782248 upstreamES 45779689 upstreamEE 45779836 downstreamES 45785777 downstreamEE 45785921	https://betsholtzlab.org/Publications/MouseKidenyOB/splicing/GE_Lean_6w_vs_GE_Obese_6w/SE/191_Cep164_chr9_45785778_45785921_-@chr9_45781952_45782248_-@chr9_45779690_45779836_-.pdf	Online figure
ENSMUSG00000037017.14	Zscan21	3.68018e-07	5.46271e-05	0	0.767	-0.767	chr5	+	SE	exonStart_0base 138117835 exonEnd 138117920 upstreamES 138116915 upstreamEE 138117007 downstreamES 138124977 downstreamEE 138125690	https://betsholtzlab.org/Publications/MouseKidenyOB/splicing/GE_Lean_6w_vs_GE_Obese_6w/SE/192_Zscan21_chr5_138116916_138117007_+@chr5_138117836_138117920_+@chr5_138124978_138125690_+.pdf	Online figure
ENSMUSG00000083012.7	Fam220a	1.20559e-05	0.000417914	1	0.082	0.918	chr5	+	SE	exonStart_0base 143551408 exonEnd 143551541 upstreamES 143548705 upstreamEE 143549134 downstreamES 143562756 downstreamEE 143564525	https://betsholtzlab.org/Publications/MouseKidenyOB/splicing/GE_Lean_6w_vs_GE_Obese_6w/SE/193_Fam220a_chr5_143548706_143549134_+@chr5_143551409_143551541_+@chr5_143562757_143564525_+.pdf	Online figure
ENSMUSG00000031626.15	Sorbs2	7.96513e-06	0.000331728	1	0	1	chr8	+	SE	exonStart_0base 45645760 exonEnd 45645852 upstreamES 45627971 upstreamEE 45628272 downstreamES 45658802 downstreamEE 45658941	https://betsholtzlab.org/Publications/MouseKidenyOB/splicing/GE_Lean_6w_vs_GE_Obese_6w/SE/194_Sorbs2_chr8_45627972_45628272_+@chr8_45645761_45645852_+@chr8_45658803_45658941_+.pdf	Online figure
ENSMUSG00000031626.15	Sorbs2	0.00106646	0.00931181	0.201	0.646	-0.445	chr8	+	SE	exonStart_0base 45770545 exonEnd 45770590 upstreamES 45769828 upstreamEE 45769895 downstreamES 45772533 downstreamEE 45772653	https://betsholtzlab.org/Publications/MouseKidenyOB/splicing/GE_Lean_6w_vs_GE_Obese_6w/SE/195_Sorbs2_chr8_45769829_45769895_+@chr8_45770546_45770590_+@chr8_45772534_45772653_+.pdf	Online figure
ENSMUSG00000031626.15	Sorbs2	3.13694e-05	0.000707858	1	0	1	chr8	+	SE	exonStart_0base 45783542 exonEnd 45783626 upstreamES 45782801 upstreamEE 45782960 downstreamES 45785268 downstreamEE 45785325	https://betsholtzlab.org/Publications/MouseKidenyOB/splicing/GE_Lean_6w_vs_GE_Obese_6w/SE/196_Sorbs2_chr8_45782802_45782960_+@chr8_45783543_45783626_+@chr8_45785269_45785325_+.pdf	Online figure
ENSMUSG00000048249.13	Crebrf	0.00132497	0.0110682	0.532	1	-0.468	chr17	+	SE	exonStart_0base 26736788 exonEnd 26736983 upstreamES 26715649 upstreamEE 26715774 downstreamES 26739542 downstreamEE 26739668	https://betsholtzlab.org/Publications/MouseKidenyOB/splicing/GE_Lean_6w_vs_GE_Obese_6w/SE/197_Crebrf_chr17_26715650_26715774_+@chr17_26736789_26736983_+@chr17_26739543_26739668_+.pdf	Online figure
ENSMUSG00000026565.17	Pou2f1	0.000255813	0.00325672	0.669	0	0.669	chr1	-	SE	exonStart_0base 165883046 exonEnd 165883118 upstreamES 165880129 upstreamEE 165880475 downstreamES 165891809 downstreamEE 165891915	https://betsholtzlab.org/Publications/MouseKidenyOB/splicing/GE_Lean_6w_vs_GE_Obese_6w/SE/198_Pou2f1_chr1_165891810_165891915_-@chr1_165883047_165883118_-@chr1_165880130_165880475_-.pdf	Online figure
ENSMUSG00000027259.14	Adal	0.00204321	0.015087	0.56	1	-0.44	chr2	+	SE	exonStart_0base 121142523 exonEnd 121142654 upstreamES 121142092 upstreamEE 121142303 downstreamES 121143148 downstreamEE 121143209	https://betsholtzlab.org/Publications/MouseKidenyOB/splicing/GE_Lean_6w_vs_GE_Obese_6w/SE/199_Adal_chr2_121142093_121142303_+@chr2_121142524_121142654_+@chr2_121143149_121143209_+.pdf	Online figure
ENSMUSG00000039997.15	Ifi203	0.000359488	0.00423845	0.372	1	-0.628	chr1	-	SE	exonStart_0base 173933782 exonEnd 173933926 upstreamES 173926805 upstreamEE 173927222 downstreamES 173935009 downstreamEE 173935177	https://betsholtzlab.org/Publications/MouseKidenyOB/splicing/GE_Lean_6w_vs_GE_Obese_6w/SE/200_Ifi203_chr1_173935010_173935177_-@chr1_173933783_173933926_-@chr1_173926806_173927222_-.pdf	Online figure
ENSMUSG00000041977.16	Arhgef11	0.00420409	0.0261131	1	0.44	0.56	chr3	+	SE	exonStart_0base 87698764 exonEnd 87698902 upstreamES 87697987 upstreamEE 87698064 downstreamES 87702157 downstreamEE 87702232	https://betsholtzlab.org/Publications/MouseKidenyOB/splicing/GE_Lean_6w_vs_GE_Obese_6w/SE/201_Arhgef11_chr3_87697988_87698064_+@chr3_87698765_87698902_+@chr3_87702158_87702232_+.pdf	Online figure
ENSMUSG00000041977.16	Arhgef11	4.48855e-07	5.75272e-05	0	1	-1	chr3	+	SE	exonStart_0base 87722356 exonEnd 87722483 upstreamES 87717423 upstreamEE 87717520 downstreamES 87725478 downstreamEE 87725658	https://betsholtzlab.org/Publications/MouseKidenyOB/splicing/GE_Lean_6w_vs_GE_Obese_6w/SE/202_Arhgef11_chr3_87717424_87717520_+@chr3_87722357_87722483_+@chr3_87725479_87725658_+.pdf	Online figure
ENSMUSG00000045962.15	Wnk1	5.15152e-05	0.000990769	1	0	1	chr6	-	SE	exonStart_0base 119953770 exonEnd 119953902 upstreamES 119952684 upstreamEE 119952969 downstreamES 119956070 downstreamEE 119956170	https://betsholtzlab.org/Publications/MouseKidenyOB/splicing/GE_Lean_6w_vs_GE_Obese_6w/SE/203_Wnk1_chr6_119956071_119956170_-@chr6_119953771_119953902_-@chr6_119952685_119952969_-.pdf	Online figure
ENSMUSG00000038990.13	Cables2	0.00492506	0.0290634	0.447	1	-0.553	chr2	-	SE	exonStart_0base 180264402 exonEnd 180264474 upstreamES 180264213 upstreamEE 180264306 downstreamES 180273099 downstreamEE 180273446	https://betsholtzlab.org/Publications/MouseKidenyOB/splicing/GE_Lean_6w_vs_GE_Obese_6w/SE/204_Cables2_chr2_180273100_180273446_-@chr2_180264403_180264474_-@chr2_180264214_180264306_-.pdf	Online figure
ENSMUSG00000057335.10	Cep170	0.00282763	0.0192805	0.198	1	-0.802	chr1	-	SE	exonStart_0base 176761350 exonEnd 176761500 upstreamES 176758396 upstreamEE 176758517 downstreamES 176769712 downstreamEE 176769870	https://betsholtzlab.org/Publications/MouseKidenyOB/splicing/GE_Lean_6w_vs_GE_Obese_6w/SE/205_Cep170_chr1_176769713_176769870_-@chr1_176761351_176761500_-@chr1_176758397_176758517_-.pdf	Online figure
ENSMUSG00000035234.17	Fam175a	0.00170444	0.0132266	0.297	1	-0.703	chr5	-	SE	exonStart_0base 100815161 exonEnd 100815228 upstreamES 100812008 upstreamEE 100812202 downstreamES 100818516 downstreamEE 100818607	https://betsholtzlab.org/Publications/MouseKidenyOB/splicing/GE_Lean_6w_vs_GE_Obese_6w/SE/206_Fam175a_chr5_100818517_100818607_-@chr5_100815162_100815228_-@chr5_100812009_100812202_-.pdf	Online figure
ENSMUSG00000007610.14	Gtpbp3	0.000770205	0.00739423	0.253	1	-0.747	chr8	+	SE	exonStart_0base 71490654 exonEnd 71490967 upstreamES 71490334 upstreamEE 71490537 downstreamES 71491065 downstreamEE 71491209	https://betsholtzlab.org/Publications/MouseKidenyOB/splicing/GE_Lean_6w_vs_GE_Obese_6w/SE/207_Gtpbp3_chr8_71490335_71490537_+@chr8_71490655_71490967_+@chr8_71491066_71491209_+.pdf	Online figure
ENSMUSG00000023861.16	Mpc1	6.09355e-05	0.00111632	0	1	-1	chr17	+	SE	exonStart_0base 8293414 exonEnd 8293495 upstreamES 8283851 upstreamEE 8283961 downstreamES 8296534 downstreamEE 8296631	https://betsholtzlab.org/Publications/MouseKidenyOB/splicing/GE_Lean_6w_vs_GE_Obese_6w/SE/208_Mpc1_chr17_8283852_8283961_+@chr17_8293415_8293495_+@chr17_8296535_8296631_+.pdf	Online figure
ENSMUSG00000023861.16	Mpc1	7.63909e-05	0.00129306	0	1	-1	chr17	+	SE	exonStart_0base 8296526 exonEnd 8296530 upstreamES 8283795 upstreamEE 8283961 downstreamES 8296534 downstreamEE 8296631	https://betsholtzlab.org/Publications/MouseKidenyOB/splicing/GE_Lean_6w_vs_GE_Obese_6w/SE/209_Mpc1_chr17_8283796_8283961_+@chr17_8296527_8296530_+@chr17_8296535_8296631_+.pdf	Online figure
ENSMUSG00000052748.13	Swt1	0.0011756	0.0100525	0.936	0.314	0.622	chr1	-	SE	exonStart_0base 151401079 exonEnd 151401173 upstreamES 151397205 upstreamEE 151397351 downstreamES 151402954 downstreamEE 151403143	https://betsholtzlab.org/Publications/MouseKidenyOB/splicing/GE_Lean_6w_vs_GE_Obese_6w/SE/210_Swt1_chr1_151402955_151403143_-@chr1_151401080_151401173_-@chr1_151397206_151397351_-.pdf	Online figure
ENSMUSG00000026782.14	Abi2	0.000399211	0.00458866	1	0.153	0.847	chr1	+	SE	exonStart_0base 60464528 exonEnd 60464615 upstreamES 60453603 upstreamEE 60453762 downstreamES 60470665 downstreamEE 60470839	https://betsholtzlab.org/Publications/MouseKidenyOB/splicing/GE_Lean_6w_vs_GE_Obese_6w/SE/211_Abi2_chr1_60453604_60453762_+@chr1_60464529_60464615_+@chr1_60470666_60470839_+.pdf	Online figure
ENSMUSG00000070738.9	Dgkd	0.00652624	0.0352429	1	0.485	0.515	chr1	+	SE	exonStart_0base 87881858 exonEnd 87881939 upstreamES 87880367 upstreamEE 87880478 downstreamES 87915099 downstreamEE 87915204	https://betsholtzlab.org/Publications/MouseKidenyOB/splicing/GE_Lean_6w_vs_GE_Obese_6w/SE/212_Dgkd_chr1_87880368_87880478_+@chr1_87881859_87881939_+@chr1_87915100_87915204_+.pdf	Online figure
ENSMUSG00000032307.15	Ube2q2	0.00513045	0.0299096	1	0.527	0.473	chr9	+	SE	exonStart_0base 55168202 exonEnd 55168307 upstreamES 55162967 upstreamEE 55163069 downstreamES 55176190 downstreamEE 55176247	https://betsholtzlab.org/Publications/MouseKidenyOB/splicing/GE_Lean_6w_vs_GE_Obese_6w/SE/213_Ube2q2_chr9_55162968_55163069_+@chr9_55168203_55168307_+@chr9_55176191_55176247_+.pdf	Online figure
ENSMUSG00000038260.9	Trpm4	3.5475e-05	0.000763438	0.32	1	-0.68	chr7	-	SE	exonStart_0base 45304947 exonEnd 45305080 upstreamES 45304794 upstreamEE 45304867 downstreamES 45305288 downstreamEE 45305494	https://betsholtzlab.org/Publications/MouseKidenyOB/splicing/GE_Lean_6w_vs_GE_Obese_6w/SE/214_Trpm4_chr7_45305289_45305494_-@chr7_45304948_45305080_-@chr7_45304795_45304867_-.pdf	Online figure
ENSMUSG00000028886.14	Eya3	7.54372e-05	0.00128424	0.44	0	0.44	chr4	+	SE	exonStart_0base 132680755 exonEnd 132680893 upstreamES 132672895 upstreamEE 132673032 downstreamES 132689704 downstreamEE 132689790	https://betsholtzlab.org/Publications/MouseKidenyOB/splicing/GE_Lean_6w_vs_GE_Obese_6w/SE/215_Eya3_chr4_132672896_132673032_+@chr4_132680756_132680893_+@chr4_132689705_132689790_+.pdf	Online figure
ENSMUSG00000026098.12	Pms1	0.00947772	0.0461451	1	0.315	0.685	chr1	-	SE	exonStart_0base 53256628 exonEnd 53256792 upstreamES 53216230 upstreamEE 53216347 downstreamES 53267827 downstreamEE 53267930	https://betsholtzlab.org/Publications/MouseKidenyOB/splicing/GE_Lean_6w_vs_GE_Obese_6w/SE/216_Pms1_chr1_53267828_53267930_-@chr1_53256629_53256792_-@chr1_53216231_53216347_-.pdf	Online figure
ENSMUSG00000020716.14	Nf1	0.00636869	0.0346507	1	0.269	0.731	chr11	+	SE	exonStart_0base 79570230 exonEnd 79570447 upstreamES 79569123 upstreamEE 79569170 downstreamES 79578253 downstreamEE 79578942	https://betsholtzlab.org/Publications/MouseKidenyOB/splicing/GE_Lean_6w_vs_GE_Obese_6w/SE/217_Nf1_chr11_79569124_79569170_+@chr11_79570231_79570447_+@chr11_79578254_79578942_+.pdf	Online figure
ENSMUSG00000026490.16	Cdc42bpa	0.000988969	0.00879438	0.296	1	-0.704	chr1	+	SE	exonStart_0base 180093943 exonEnd 180094186 upstreamES 180084371 upstreamEE 180084505 downstreamES 180094380 downstreamEE 180094491	https://betsholtzlab.org/Publications/MouseKidenyOB/splicing/GE_Lean_6w_vs_GE_Obese_6w/SE/218_Cdc42bpa_chr1_180084372_180084505_+@chr1_180093944_180094186_+@chr1_180094381_180094491_+.pdf	Online figure
ENSMUSG00000026490.16	Cdc42bpa	3.15217e-05	0.000707858	1	0	1	chr1	+	SE	exonStart_0base 180155794 exonEnd 180155980 upstreamES 180151159 upstreamEE 180151277 downstreamES 180159605 downstreamEE 180159723	https://betsholtzlab.org/Publications/MouseKidenyOB/splicing/GE_Lean_6w_vs_GE_Obese_6w/SE/219_Cdc42bpa_chr1_180151160_180151277_+@chr1_180155795_180155980_+@chr1_180159606_180159723_+.pdf	Online figure
ENSMUSG00000025907.13	Rb1cc1	4.17076e-06	0.000223764	0	1	-1	chr1	+	SE	exonStart_0base 6264541 exonEnd 6264590 upstreamES 6263023 upstreamEE 6263264 downstreamES 6265573 downstreamEE 6265621	https://betsholtzlab.org/Publications/MouseKidenyOB/splicing/GE_Lean_6w_vs_GE_Obese_6w/SE/220_Rb1cc1_chr1_6263024_6263264_+@chr1_6264542_6264590_+@chr1_6265574_6265621_+.pdf	Online figure
ENSMUSG00000041763.13	Tpp2	0.000190335	0.00266792	0.48	1	-0.52	chr1	+	SE	exonStart_0base 43980307 exonEnd 43980404 upstreamES 43978734 upstreamEE 43978835 downstreamES 43981729 downstreamEE 43981867	https://betsholtzlab.org/Publications/MouseKidenyOB/splicing/GE_Lean_6w_vs_GE_Obese_6w/SE/221_Tpp2_chr1_43978735_43978835_+@chr1_43980308_43980404_+@chr1_43981730_43981867_+.pdf	Online figure
ENSMUSG00000031948.12	Kars	4.02711e-07	5.5507e-05	0.834	0	0.834	chr8	-	SE	exonStart_0base 112008481 exonEnd 112008539 upstreamES 112008206 upstreamEE 112008386 downstreamES 112011209 downstreamEE 112011266	https://betsholtzlab.org/Publications/MouseKidenyOB/splicing/GE_Lean_6w_vs_GE_Obese_6w/SE/222_Kars_chr8_112011210_112011266_-@chr8_112008482_112008539_-@chr8_112008207_112008386_-.pdf	Online figure
ENSMUSG00000021694.17	Ercc8	6.29264e-07	6.74594e-05	0	1	-1	chr13	+	SE	exonStart_0base 108160634 exonEnd 108160730 upstreamES 108158730 upstreamEE 108158870 downstreamES 108169367 downstreamEE 108169491	https://betsholtzlab.org/Publications/MouseKidenyOB/splicing/GE_Lean_6w_vs_GE_Obese_6w/SE/223_Ercc8_chr13_108158731_108158870_+@chr13_108160635_108160730_+@chr13_108169368_108169491_+.pdf	Online figure
ENSMUSG00000021694.17	Ercc8	0.000319786	0.00389364	1	0.362	0.638	chr13	+	SE	exonStart_0base 108166389 exonEnd 108166491 upstreamES 108160634 upstreamEE 108160730 downstreamES 108169367 downstreamEE 108169491	https://betsholtzlab.org/Publications/MouseKidenyOB/splicing/GE_Lean_6w_vs_GE_Obese_6w/SE/224_Ercc8_chr13_108160635_108160730_+@chr13_108166390_108166491_+@chr13_108169368_108169491_+.pdf	Online figure
ENSMUSG00000057342.12	Sphk2	3.02374e-05	0.000707858	1	0.469	0.531	chr7	-	SE	exonStart_0base 45716992 exonEnd 45717063 upstreamES 45713259 upstreamEE 45713728 downstreamES 45717700 downstreamEE 45718002	https://betsholtzlab.org/Publications/MouseKidenyOB/splicing/GE_Lean_6w_vs_GE_Obese_6w/SE/225_Sphk2_chr7_45717701_45718002_-@chr7_45716993_45717063_-@chr7_45713260_45713728_-.pdf	Online figure
ENSMUSG00000035696.14	Rnf38	0.00916518	0.0450784	1	0.359	0.641	chr4	-	SE	exonStart_0base 44149024 exonEnd 44149238 upstreamES 44143447 upstreamEE 44143615 downstreamES 44152359 downstreamEE 44152553	https://betsholtzlab.org/Publications/MouseKidenyOB/splicing/GE_Lean_6w_vs_GE_Obese_6w/SE/226_Rnf38_chr4_44152360_44152553_-@chr4_44149025_44149238_-@chr4_44143448_44143615_-.pdf	Online figure
ENSMUSG00000035696.14	Rnf38	2.8659e-05	0.000700514	0	1	-1	chr4	-	SE	exonStart_0base 44158902 exonEnd 44159052 upstreamES 44152359 upstreamEE 44152553 downstreamES 44168242 downstreamEE 44168339	https://betsholtzlab.org/Publications/MouseKidenyOB/splicing/GE_Lean_6w_vs_GE_Obese_6w/SE/227_Rnf38_chr4_44168243_44168339_-@chr4_44158903_44159052_-@chr4_44152360_44152553_-.pdf	Online figure
ENSMUSG00000030839.9	Sergef	9.39941e-06	0.000364355	1	0.137	0.863	chr7	-	SE	exonStart_0base 46635420 exonEnd 46635556 upstreamES 46633754 upstreamEE 46633910 downstreamES 46639712 downstreamEE 46639807	https://betsholtzlab.org/Publications/MouseKidenyOB/splicing/GE_Lean_6w_vs_GE_Obese_6w/SE/228_Sergef_chr7_46639713_46639807_-@chr7_46635421_46635556_-@chr7_46633755_46633910_-.pdf	Online figure
ENSMUSG00000026743.15	Mllt10	0.00156665	0.012357	1	0.336	0.664	chr2	+	SE	exonStart_0base 18146776 exonEnd 18146872 upstreamES 18123708 upstreamEE 18123812 downstreamES 18162316 downstreamEE 18162886	https://betsholtzlab.org/Publications/MouseKidenyOB/splicing/GE_Lean_6w_vs_GE_Obese_6w/SE/229_Mllt10_chr2_18123709_18123812_+@chr2_18146777_18146872_+@chr2_18162317_18162886_+.pdf	Online figure
ENSMUSG00000006641.11	Slc5a6	0.00307212	0.0204958	0.205	1	-0.795	chr5	-	SE	exonStart_0base 31040657 exonEnd 31040798 upstreamES 31040361 upstreamEE 31040491 downstreamES 31041143 downstreamEE 31041298	https://betsholtzlab.org/Publications/MouseKidenyOB/splicing/GE_Lean_6w_vs_GE_Obese_6w/SE/230_Slc5a6_chr5_31041144_31041298_-@chr5_31040658_31040798_-@chr5_31040362_31040491_-.pdf	Online figure
ENSMUSG00000026784.13	Pdss1	7.88435e-06	0.000330743	1	0	1	chr2	+	SE	exonStart_0base 22929743 exonEnd 22929857 upstreamES 22929539 upstreamEE 22929620 downstreamES 22935558 downstreamEE 22935639	https://betsholtzlab.org/Publications/MouseKidenyOB/splicing/GE_Lean_6w_vs_GE_Obese_6w/SE/231_Pdss1_chr2_22929540_22929620_+@chr2_22929744_22929857_+@chr2_22935559_22935639_+.pdf	Online figure
ENSMUSG00000026074.13	Map4k4	5.43333e-06	0.000271151	0	1	-1	chr1	+	SE	exonStart_0base 40011649 exonEnd 40011841 upstreamES 40010556 upstreamEE 40010677 downstreamES 40014105 downstreamEE 40014223	https://betsholtzlab.org/Publications/MouseKidenyOB/splicing/GE_Lean_6w_vs_GE_Obese_6w/SE/232_Map4k4_chr1_40010557_40010677_+@chr1_40011650_40011841_+@chr1_40014106_40014223_+.pdf	Online figure
ENSMUSG00000037110.18	Ralgapa2	0.000949522	0.00855753	0.261	1	-0.739	chr2	-	SE	exonStart_0base 146327377 exonEnd 146327536 upstreamES 146314922 upstreamEE 146315050 downstreamES 146333415 downstreamEE 146333571	https://betsholtzlab.org/Publications/MouseKidenyOB/splicing/GE_Lean_6w_vs_GE_Obese_6w/SE/233_Ralgapa2_chr2_146333416_146333571_-@chr2_146327378_146327536_-@chr2_146314923_146315050_-.pdf	Online figure
ENSMUSG00000020652.16	Cenpo	4.72967e-06	0.000246667	1	0	1	chr12	-	SE	exonStart_0base 4231515 exonEnd 4231682 upstreamES 4217207 upstreamEE 4217322 downstreamES 4233530 downstreamEE 4233657	https://betsholtzlab.org/Publications/MouseKidenyOB/splicing/GE_Lean_6w_vs_GE_Obese_6w/SE/234_Cenpo_chr12_4233531_4233657_-@chr12_4231516_4231682_-@chr12_4217208_4217322_-.pdf	Online figure
ENSMUSG00000032305.13	Fam219b	3.1731e-06	0.000194937	0	1	-1	chr9	+	SE	exonStart_0base 57539245 exonEnd 57539294 upstreamES 57538810 upstreamEE 57538888 downstreamES 57540654 downstreamEE 57543187	https://betsholtzlab.org/Publications/MouseKidenyOB/splicing/GE_Lean_6w_vs_GE_Obese_6w/SE/235_Fam219b_chr9_57538811_57538888_+@chr9_57539246_57539294_+@chr9_57540655_57543187_+.pdf	Online figure
ENSMUSG00000056367.13	Actr3b	9.75905e-06	0.000367695	0	1	-1	chr5	+	SE	exonStart_0base 25829525 exonEnd 25829669 upstreamES 25825107 upstreamEE 25825215 downstreamES 25831610 downstreamEE 25831784	https://betsholtzlab.org/Publications/MouseKidenyOB/splicing/GE_Lean_6w_vs_GE_Obese_6w/SE/236_Actr3b_chr5_25825108_25825215_+@chr5_25829526_25829669_+@chr5_25831611_25831784_+.pdf	Online figure
ENSMUSG00000050549.8	5730508B09Rik	0.000356249	0.00421321	0	0.71	-0.71	chr3	-	SE	exonStart_0base 127887954 exonEnd 127887985 upstreamES 127869679 upstreamEE 127871000 downstreamES 127896033 downstreamEE 127896288	https://betsholtzlab.org/Publications/MouseKidenyOB/splicing/GE_Lean_6w_vs_GE_Obese_6w/SE/237_5730508B09Rik_chr3_127896034_127896288_-@chr3_127887955_127887985_-@chr3_127869680_127871000_-.pdf	Online figure
ENSMUSG00000022837.12	Iqcb1	0.00170225	0.0132266	0.331	1	-0.669	chr16	+	SE	exonStart_0base 36858454 exonEnd 36858603 upstreamES 36856290 upstreamEE 36856433 downstreamES 36867558 downstreamEE 36867690	https://betsholtzlab.org/Publications/MouseKidenyOB/splicing/GE_Lean_6w_vs_GE_Obese_6w/SE/238_Iqcb1_chr16_36856291_36856433_+@chr16_36858455_36858603_+@chr16_36867559_36867690_+.pdf	Online figure
ENSMUSG00000085396.6	Firre	0.00095179	0.00855753	0.209	1	-0.791	chrX	-	SE	exonStart_0base 50627206 exonEnd 50627250 upstreamES 50626436 upstreamEE 50626509 downstreamES 50630890 downstreamEE 50630995	https://betsholtzlab.org/Publications/MouseKidenyOB/splicing/GE_Lean_6w_vs_GE_Obese_6w/SE/239_Firre_chrX_50630891_50630995_-@chrX_50627207_50627250_-@chrX_50626437_50626509_-.pdf	Online figure
ENSMUSG00000085396.6	Firre	0.00484626	0.0287744	0.446	1	-0.554	chrX	-	SE	exonStart_0base 50627206 exonEnd 50627309 upstreamES 50626436 upstreamEE 50626509 downstreamES 50630890 downstreamEE 50630995	https://betsholtzlab.org/Publications/MouseKidenyOB/splicing/GE_Lean_6w_vs_GE_Obese_6w/SE/240_Firre_chrX_50630891_50630995_-@chrX_50627207_50627309_-@chrX_50626437_50626509_-.pdf	Online figure
ENSMUSG00000029056.12	Pank4	3.9816e-07	5.5507e-05	0	1	-1	chr4	+	SE	exonStart_0base 154980093 exonEnd 154980234 upstreamES 154979725 upstreamEE 154979794 downstreamES 154980494 downstreamEE 154980938	https://betsholtzlab.org/Publications/MouseKidenyOB/splicing/GE_Lean_6w_vs_GE_Obese_6w/SE/241_Pank4_chr4_154979726_154979794_+@chr4_154980094_154980234_+@chr4_154980495_154980938_+.pdf	Online figure
ENSMUSG00000041112.14	Elmo1	0.00655987	0.0353586	1	0.278	0.722	chr13	+	SE	exonStart_0base 20600179 exonEnd 20600257 upstreamES 20589643 upstreamEE 20589726 downstreamES 20605098 downstreamEE 20606528	https://betsholtzlab.org/Publications/MouseKidenyOB/splicing/GE_Lean_6w_vs_GE_Obese_6w/SE/242_Elmo1_chr13_20589644_20589726_+@chr13_20600180_20600257_+@chr13_20605099_20606528_+.pdf	Online figure
ENSMUSG00000046337.16	Fam178b	0.00829107	0.0416279	0.528	1	-0.472	chr1	-	SE	exonStart_0base 36578518 exonEnd 36578644 upstreamES 36564830 upstreamEE 36564908 downstreamES 36585915 downstreamEE 36585999	https://betsholtzlab.org/Publications/MouseKidenyOB/splicing/GE_Lean_6w_vs_GE_Obese_6w/SE/243_Fam178b_chr1_36585916_36585999_-@chr1_36578519_36578644_-@chr1_36564831_36564908_-.pdf	Online figure
ENSMUSG00000026632.16	Tatdn3	0.000613411	0.00628502	0.377	1	-0.623	chr1	-	SE	exonStart_0base 191052859 exonEnd 191052972 upstreamES 191049281 upstreamEE 191049362 downstreamES 191054855 downstreamEE 191054911	https://betsholtzlab.org/Publications/MouseKidenyOB/splicing/GE_Lean_6w_vs_GE_Obese_6w/SE/244_Tatdn3_chr1_191054856_191054911_-@chr1_191052860_191052972_-@chr1_191049282_191049362_-.pdf	Online figure
ENSMUSG00000056938.15	Acbd4	0.000317885	0.00389364	0.338	0.816	-0.478	chr11	+	SE	exonStart_0base 103103234 exonEnd 103103369 upstreamES 103103038 upstreamEE 103103145 downstreamES 103103525 downstreamEE 103103644	https://betsholtzlab.org/Publications/MouseKidenyOB/splicing/GE_Lean_6w_vs_GE_Obese_6w/SE/245_Acbd4_chr11_103103039_103103145_+@chr11_103103235_103103369_+@chr11_103103526_103103644_+.pdf	Online figure
ENSMUSG00000056938.15	Acbd4	1.53653e-06	0.000120202	1	0	1	chr11	+	SE	exonStart_0base 103111281 exonEnd 103111430 upstreamES 103106182 upstreamEE 103106234 downstreamES 103111541 downstreamEE 103111739	https://betsholtzlab.org/Publications/MouseKidenyOB/splicing/GE_Lean_6w_vs_GE_Obese_6w/SE/246_Acbd4_chr11_103106183_103106234_+@chr11_103111282_103111430_+@chr11_103111542_103111739_+.pdf	Online figure
ENSMUSG00000049550.16	Clip1	0.000916317	0.00835363	1	0.241	0.759	chr5	-	SE	exonStart_0base 123635173 exonEnd 123635278 upstreamES 123630224 upstreamEE 123631169 downstreamES 123638955 downstreamEE 123638988	https://betsholtzlab.org/Publications/MouseKidenyOB/splicing/GE_Lean_6w_vs_GE_Obese_6w/SE/247_Clip1_chr5_123638956_123638988_-@chr5_123635174_123635278_-@chr5_123630225_123631169_-.pdf	Online figure
ENSMUSG00000021481.10	Zfp346	0.000529308	0.00568491	0.407	1	-0.593	chr13	+	SE	exonStart_0base 55130533 exonEnd 55130627 upstreamES 55122015 upstreamEE 55122515 downstreamES 55132306 downstreamEE 55132356	https://betsholtzlab.org/Publications/MouseKidenyOB/splicing/GE_Lean_6w_vs_GE_Obese_6w/SE/248_Zfp346_chr13_55122016_55122515_+@chr13_55130534_55130627_+@chr13_55132307_55132356_+.pdf	Online figure
ENSMUSG00000021481.10	Zfp346	0.000313929	0.00385846	0.174	1	-0.826	chr13	+	SE	exonStart_0base 55130536 exonEnd 55130627 upstreamES 55122281 upstreamEE 55122515 downstreamES 55132306 downstreamEE 55132705	https://betsholtzlab.org/Publications/MouseKidenyOB/splicing/GE_Lean_6w_vs_GE_Obese_6w/SE/249_Zfp346_chr13_55122282_55122515_+@chr13_55130537_55130627_+@chr13_55132307_55132705_+.pdf	Online figure
ENSMUSG00000070880.9	Gad1	0.000390368	0.00451066	0	0.774	-0.774	chr2	+	SE	exonStart_0base 70584419 exonEnd 70584499 upstreamES 70579110 upstreamEE 70579201 downstreamES 70585833 downstreamEE 70585946	https://betsholtzlab.org/Publications/MouseKidenyOB/splicing/GE_Lean_6w_vs_GE_Obese_6w/SE/250_Gad1_chr2_70579111_70579201_+@chr2_70584420_70584499_+@chr2_70585834_70585946_+.pdf	Online figure
ENSMUSG00000035623.13	Rsf1	1.40993e-05	0.000460188	0	1	-1	chr7	+	SE	exonStart_0base 97631408 exonEnd 97631619 upstreamES 97616842 upstreamEE 97616934 downstreamES 97636376 downstreamEE 97636469	https://betsholtzlab.org/Publications/MouseKidenyOB/splicing/GE_Lean_6w_vs_GE_Obese_6w/SE/251_Rsf1_chr7_97616843_97616934_+@chr7_97631409_97631619_+@chr7_97636377_97636469_+.pdf	Online figure
ENSMUSG00000028878.10	Fam76a	0.00841191	0.0421615	0.279	0.716	-0.437	chr4	-	SE	exonStart_0base 132910691 exonEnd 132910778 upstreamES 132903897 upstreamEE 132904033 downstreamES 132913668 downstreamEE 132913826	https://betsholtzlab.org/Publications/MouseKidenyOB/splicing/GE_Lean_6w_vs_GE_Obese_6w/SE/252_Fam76a_chr4_132913669_132913826_-@chr4_132910692_132910778_-@chr4_132903898_132904033_-.pdf	Online figure
ENSMUSG00000030313.14	Dennd5b	0.00012552	0.00190484	0.079	1	-0.921	chr6	-	SE	exonStart_0base 149084870 exonEnd 149084936 upstreamES 149080805 upstreamEE 149080915 downstreamES 149101182 downstreamEE 149101584	https://betsholtzlab.org/Publications/MouseKidenyOB/splicing/GE_Lean_6w_vs_GE_Obese_6w/SE/253_Dennd5b_chr6_149101183_149101584_-@chr6_149084871_149084936_-@chr6_149080806_149080915_-.pdf	Online figure
ENSMUSG00000025967.15	Eef1b2	0.00117384	0.0100523	0.416	1	-0.584	chr1	+	SE	exonStart_0base 63177866 exonEnd 63177876 upstreamES 63177128 upstreamEE 63177291 downstreamES 63178438 downstreamEE 63178565	https://betsholtzlab.org/Publications/MouseKidenyOB/splicing/GE_Lean_6w_vs_GE_Obese_6w/SE/254_Eef1b2_chr1_63177129_63177291_+@chr1_63177867_63177876_+@chr1_63178439_63178565_+.pdf	Online figure
ENSMUSG00000007379.14	Dennd2c	0.00165615	0.0129456	1	0.5	0.5	chr3	+	SE	exonStart_0base 103146511 exonEnd 103146560 upstreamES 103140967 upstreamEE 103141155 downstreamES 103149040 downstreamEE 103149222	https://betsholtzlab.org/Publications/MouseKidenyOB/splicing/GE_Lean_6w_vs_GE_Obese_6w/SE/255_Dennd2c_chr3_103140968_103141155_+@chr3_103146512_103146560_+@chr3_103149041_103149222_+.pdf	Online figure
ENSMUSG00000044562.10	Rasip1	0.00188016	0.0141906	0.479	0.888	-0.409	chr7	+	SE	exonStart_0base 45628413 exonEnd 45629081 upstreamES 45627765 upstreamEE 45627906 downstreamES 45630139 downstreamEE 45630495	https://betsholtzlab.org/Publications/MouseKidenyOB/splicing/GE_Lean_6w_vs_GE_Obese_6w/SE/256_Rasip1_chr7_45627766_45627906_+@chr7_45628414_45629081_+@chr7_45630140_45630495_+.pdf	Online figure
ENSMUSG00000087366.6	Junos	0.000423621	0.00478973	0.603	0	0.603	chr4	+	SE	exonStart_0base 95137414 exonEnd 95137494 upstreamES 95101145 upstreamEE 95101307 downstreamES 95147104 downstreamEE 95147200	https://betsholtzlab.org/Publications/MouseKidenyOB/splicing/GE_Lean_6w_vs_GE_Obese_6w/SE/257_Junos_chr4_95101146_95101307_+@chr4_95137415_95137494_+@chr4_95147105_95147200_+.pdf	Online figure
ENSMUSG00000026017.12	Carf	0.00455581	0.0277052	0.486	0	0.486	chr1	+	SE	exonStart_0base 60102626 exonEnd 60102784 upstreamES 60098246 upstreamEE 60098307 downstreamES 60105310 downstreamEE 60105434	https://betsholtzlab.org/Publications/MouseKidenyOB/splicing/GE_Lean_6w_vs_GE_Obese_6w/SE/258_Carf_chr1_60098247_60098307_+@chr1_60102627_60102784_+@chr1_60105311_60105434_+.pdf	Online figure
ENSMUSG00000038271.16	Iffo1	2.07794e-05	0.000576855	0.096	1	-0.904	chr6	+	SE	exonStart_0base 125151794 exonEnd 125151803 upstreamES 125151384 upstreamEE 125151525 downstreamES 125152613 downstreamEE 125152771	https://betsholtzlab.org/Publications/MouseKidenyOB/splicing/GE_Lean_6w_vs_GE_Obese_6w/SE/259_Iffo1_chr6_125151385_125151525_+@chr6_125151795_125151803_+@chr6_125152614_125152771_+.pdf	Online figure
ENSMUSG00000029534.16	St7	0.00563303	0.0318535	0.744	0.142	0.602	chr6	+	SE	exonStart_0base 17850356 exonEnd 17850425 upstreamES 17848003 upstreamEE 17848079 downstreamES 17852257 downstreamEE 17852412	https://betsholtzlab.org/Publications/MouseKidenyOB/splicing/GE_Lean_6w_vs_GE_Obese_6w/SE/260_St7_chr6_17848004_17848079_+@chr6_17850357_17850425_+@chr6_17852258_17852412_+.pdf	Online figure
ENSMUSG00000029534.16	St7	0.00239005	0.0169976	1	0.398	0.602	chr6	+	SE	exonStart_0base 17921988 exonEnd 17922124 upstreamES 17906407 upstreamEE 17906510 downstreamES 17930765 downstreamEE 17930858	https://betsholtzlab.org/Publications/MouseKidenyOB/splicing/GE_Lean_6w_vs_GE_Obese_6w/SE/261_St7_chr6_17906408_17906510_+@chr6_17921989_17922124_+@chr6_17930766_17930858_+.pdf	Online figure
ENSMUSG00000029534.16	St7	0.00703263	0.0372075	1	0.551	0.449	chr6	+	SE	exonStart_0base 17921988 exonEnd 17922139 upstreamES 17906407 upstreamEE 17906510 downstreamES 17930765 downstreamEE 17930858	https://betsholtzlab.org/Publications/MouseKidenyOB/splicing/GE_Lean_6w_vs_GE_Obese_6w/SE/262_St7_chr6_17906408_17906510_+@chr6_17921989_17922139_+@chr6_17930766_17930858_+.pdf	Online figure
ENSMUSG00000026305.14	Lrrfip1	2.18661e-05	0.000588759	0	1	-1	chr1	+	SE	exonStart_0base 91079030 exonEnd 91079081 upstreamES 91068562 upstreamEE 91068649 downstreamES 91084945 downstreamEE 91085005	https://betsholtzlab.org/Publications/MouseKidenyOB/splicing/GE_Lean_6w_vs_GE_Obese_6w/SE/263_Lrrfip1_chr1_91068563_91068649_+@chr1_91079031_91079081_+@chr1_91084946_91085005_+.pdf	Online figure
ENSMUSG00000020099.7	Unc5b	4.81323e-05	0.000948981	0	0.878	-0.878	chr10	-	SE	exonStart_0base 60777184 exonEnd 60777217 upstreamES 60774965 upstreamEE 60775160 downstreamES 60777389 downstreamEE 60777554	https://betsholtzlab.org/Publications/MouseKidenyOB/splicing/GE_Lean_6w_vs_GE_Obese_6w/SE/264_Unc5b_chr10_60777390_60777554_-@chr10_60777185_60777217_-@chr10_60774966_60775160_-.pdf	Online figure
ENSMUSG00000030016.13	Zfp638	3.15471e-05	0.000707858	1	0	1	chr6	+	SE	exonStart_0base 83981683 exonEnd 83981785 upstreamES 83978993 upstreamEE 83979909 downstreamES 83983975 downstreamEE 83984074	https://betsholtzlab.org/Publications/MouseKidenyOB/splicing/GE_Lean_6w_vs_GE_Obese_6w/SE/265_Zfp638_chr6_83978994_83979909_+@chr6_83981684_83981785_+@chr6_83983976_83984074_+.pdf	Online figure
ENSMUSG00000039678.11	Tbc1d13	1.18351e-05	0.000415232	1	0	1	chr2	+	SE	exonStart_0base 30135408 exonEnd 30135552 upstreamES 30134796 upstreamEE 30134870 downstreamES 30136672 downstreamEE 30136713	https://betsholtzlab.org/Publications/MouseKidenyOB/splicing/GE_Lean_6w_vs_GE_Obese_6w/SE/266_Tbc1d13_chr2_30134797_30134870_+@chr2_30135409_30135552_+@chr2_30136673_30136713_+.pdf	Online figure
ENSMUSG00000070942.7	Il1rl2	0.000228957	0.00301235	1	0.198	0.802	chr1	+	SE	exonStart_0base 40326488 exonEnd 40326558 upstreamES 40324626 upstreamEE 40324819 downstreamES 40327371 downstreamEE 40327606	https://betsholtzlab.org/Publications/MouseKidenyOB/splicing/GE_Lean_6w_vs_GE_Obese_6w/SE/267_Il1rl2_chr1_40324627_40324819_+@chr1_40326489_40326558_+@chr1_40327372_40327606_+.pdf	Online figure
ENSMUSG00000040648.13	Ppip5k2	5.72554e-05	0.00106576	1	0.099	0.901	chr1	-	SE	exonStart_0base 97721105 exonEnd 97721279 upstreamES 97719833 upstreamEE 97719906 downstreamES 97723669 downstreamEE 97723834	https://betsholtzlab.org/Publications/MouseKidenyOB/splicing/GE_Lean_6w_vs_GE_Obese_6w/SE/268_Ppip5k2_chr1_97723670_97723834_-@chr1_97721106_97721279_-@chr1_97719834_97719906_-.pdf	Online figure
ENSMUSG00000049800.12	Sertad2	2.2806e-05	0.000600108	1	0	1	chr11	+	SE	exonStart_0base 20595129 exonEnd 20595214 upstreamES 20543252 upstreamEE 20543760 downstreamES 20647801 downstreamEE 20653021	https://betsholtzlab.org/Publications/MouseKidenyOB/splicing/GE_Lean_6w_vs_GE_Obese_6w/SE/269_Sertad2_chr11_20543253_20543760_+@chr11_20595130_20595214_+@chr11_20647802_20653021_+.pdf	Online figure
ENSMUSG00000022708.15	Zbtb20	0.00237075	0.0169018	1	0.338	0.662	chr16	+	SE	exonStart_0base 43146896 exonEnd 43146943 upstreamES 43024937 upstreamEE 43024987 downstreamES 43282970 downstreamEE 43283005	https://betsholtzlab.org/Publications/MouseKidenyOB/splicing/GE_Lean_6w_vs_GE_Obese_6w/SE/270_Zbtb20_chr16_43024938_43024987_+@chr16_43146897_43146943_+@chr16_43282971_43283005_+.pdf	Online figure
ENSMUSG00000022708.15	Zbtb20	0.00455611	0.0277052	0.467	0	0.467	chr16	+	SE	exonStart_0base 43282970 exonEnd 43283005 upstreamES 43146896 upstreamEE 43146943 downstreamES 43302568 downstreamEE 43302615	https://betsholtzlab.org/Publications/MouseKidenyOB/splicing/GE_Lean_6w_vs_GE_Obese_6w/SE/271_Zbtb20_chr16_43146897_43146943_+@chr16_43282971_43283005_+@chr16_43302569_43302615_+.pdf	Online figure
ENSMUSG00000074643.11	Cpne1	0.00487024	0.0288576	0.476	0.888	-0.412	chr2	-	SE	exonStart_0base 156098229 exonEnd 156098372 upstreamES 156079338 upstreamEE 156079464 downstreamES 156103348 downstreamEE 156103429	https://betsholtzlab.org/Publications/MouseKidenyOB/splicing/GE_Lean_6w_vs_GE_Obese_6w/SE/272_Cpne1_chr2_156103349_156103429_-@chr2_156098230_156098372_-@chr2_156079339_156079464_-.pdf	Online figure
ENSMUSG00000018412.15	Kansl1	0.0030148	0.0202104	0.673	0.141	0.532	chr11	-	SE	exonStart_0base 104342858 exonEnd 104343047 upstreamES 104342362 upstreamEE 104342511 downstreamES 104343490 downstreamEE 104343673	https://betsholtzlab.org/Publications/MouseKidenyOB/splicing/GE_Lean_6w_vs_GE_Obese_6w/SE/273_Kansl1_chr11_104343491_104343673_-@chr11_104342859_104343047_-@chr11_104342363_104342511_-.pdf	Online figure
ENSMUSG00000018412.15	Kansl1	0.00140634	0.0114991	0.51	0	0.51	chr11	-	SE	exonStart_0base 104426423 exonEnd 104426468 upstreamES 104424936 upstreamEE 104425293 downstreamES 104441724 downstreamEE 104442291	https://betsholtzlab.org/Publications/MouseKidenyOB/splicing/GE_Lean_6w_vs_GE_Obese_6w/SE/274_Kansl1_chr11_104441725_104442291_-@chr11_104426424_104426468_-@chr11_104424937_104425293_-.pdf	Online figure
ENSMUSG00000018412.15	Kansl1	5.64724e-06	0.00027396	1	0	1	chr11	-	SE	exonStart_0base 104426423 exonEnd 104426468 upstreamES 104424936 upstreamEE 104425293 downstreamES 104467638 downstreamEE 104467991	https://betsholtzlab.org/Publications/MouseKidenyOB/splicing/GE_Lean_6w_vs_GE_Obese_6w/SE/275_Kansl1_chr11_104467639_104467991_-@chr11_104426424_104426468_-@chr11_104424937_104425293_-.pdf	Online figure
ENSMUSG00000045038.13	Prkce	0.00190729	0.0143398	0.555	1	-0.445	chr17	+	SE	exonStart_0base 86493220 exonEnd 86493420 upstreamES 86490561 upstreamEE 86490847 downstreamES 86495937 downstreamEE 86496111	https://betsholtzlab.org/Publications/MouseKidenyOB/splicing/GE_Lean_6w_vs_GE_Obese_6w/SE/276_Prkce_chr17_86490562_86490847_+@chr17_86493221_86493420_+@chr17_86495938_86496111_+.pdf	Online figure
ENSMUSG00000026014.14	Raph1	2.37272e-05	0.000618724	1	0	1	chr1	-	SE	exonStart_0base 60518979 exonEnd 60519060 upstreamES 60510416 upstreamEE 60510491 downstreamES 60525591 downstreamEE 60526100	https://betsholtzlab.org/Publications/MouseKidenyOB/splicing/GE_Lean_6w_vs_GE_Obese_6w/SE/277_Raph1_chr1_60525592_60526100_-@chr1_60518980_60519060_-@chr1_60510417_60510491_-.pdf	Online figure
ENSMUSG00000042439.11	Zfp532	0.00703788	0.0372075	0.519	1	-0.481	chr18	+	SE	exonStart_0base 65582896 exonEnd 65583006 upstreamES 65580229 upstreamEE 65580510 downstreamES 65622983 downstreamEE 65623076	https://betsholtzlab.org/Publications/MouseKidenyOB/splicing/GE_Lean_6w_vs_GE_Obese_6w/SE/278_Zfp532_chr18_65580230_65580510_+@chr18_65582897_65583006_+@chr18_65622984_65623076_+.pdf	Online figure
ENSMUSG00000042439.11	Zfp532	0.00521002	0.030282	1	0.48	0.52	chr18	+	SE	exonStart_0base 65582896 exonEnd 65583006 upstreamES 65581086 upstreamEE 65581148 downstreamES 65622983 downstreamEE 65623076	https://betsholtzlab.org/Publications/MouseKidenyOB/splicing/GE_Lean_6w_vs_GE_Obese_6w/SE/279_Zfp532_chr18_65581087_65581148_+@chr18_65582897_65583006_+@chr18_65622984_65623076_+.pdf	Online figure
ENSMUSG00000044134.8	Fam109a	6.07568e-06	0.00028003	1	0	1	chr5	+	SE	exonStart_0base 121850469 exonEnd 121850546 upstreamES 121848994 upstreamEE 121849124 downstreamES 121851167 downstreamEE 121851279	https://betsholtzlab.org/Publications/MouseKidenyOB/splicing/GE_Lean_6w_vs_GE_Obese_6w/SE/280_Fam109a_chr5_121848995_121849124_+@chr5_121850470_121850546_+@chr5_121851168_121851279_+.pdf	Online figure
ENSMUSG00000029780.13	Nt5c3	0.000935099	0.00845826	0.355	1	-0.645	chr6	-	SE	exonStart_0base 56897774 exonEnd 56897829 upstreamES 56892789 upstreamEE 56892888 downstreamES 56923671 downstreamEE 56923819	https://betsholtzlab.org/Publications/MouseKidenyOB/splicing/GE_Lean_6w_vs_GE_Obese_6w/SE/281_Nt5c3_chr6_56923672_56923819_-@chr6_56897775_56897829_-@chr6_56892790_56892888_-.pdf	Online figure
ENSMUSG00000029780.13	Nt5c3	6.09496e-06	0.00028003	0	1	-1	chr6	-	SE	exonStart_0base 56923066 exonEnd 56923112 upstreamES 56892789 upstreamEE 56892888 downstreamES 56923671 downstreamEE 56923890	https://betsholtzlab.org/Publications/MouseKidenyOB/splicing/GE_Lean_6w_vs_GE_Obese_6w/SE/282_Nt5c3_chr6_56923672_56923890_-@chr6_56923067_56923112_-@chr6_56892790_56892888_-.pdf	Online figure
ENSMUSG00000001419.16	Mef2d	0.00928175	0.0454586	1	0.59	0.41	chr3	+	SE	exonStart_0base 88158033 exonEnd 88158171 upstreamES 88156321 upstreamEE 88156525 downstreamES 88159121 downstreamEE 88159332	https://betsholtzlab.org/Publications/MouseKidenyOB/splicing/GE_Lean_6w_vs_GE_Obese_6w/SE/283_Mef2d_chr3_88156322_88156525_+@chr3_88158034_88158171_+@chr3_88159122_88159332_+.pdf	Online figure
ENSMUSG00000023206.15	Il15ra	0.00671378	0.0359871	0.473	1	-0.527	chr2	+	SE	exonStart_0base 11724095 exonEnd 11724128 upstreamES 11718263 upstreamEE 11718458 downstreamES 11730570 downstreamEE 11730646	https://betsholtzlab.org/Publications/MouseKidenyOB/splicing/GE_Lean_6w_vs_GE_Obese_6w/SE/284_Il15ra_chr2_11718264_11718458_+@chr2_11724096_11724128_+@chr2_11730571_11730646_+.pdf	Online figure
ENSMUSG00000026709.9	Dars2	0.000333431	0.00402131	0.354	1	-0.646	chr1	-	SE	exonStart_0base 161049937 exonEnd 161050000 upstreamES 161046776 upstreamEE 161046929 downstreamES 161051330 downstreamEE 161051438	https://betsholtzlab.org/Publications/MouseKidenyOB/splicing/GE_Lean_6w_vs_GE_Obese_6w/SE/285_Dars2_chr1_161051331_161051438_-@chr1_161049938_161050000_-@chr1_161046777_161046929_-.pdf	Online figure
ENSMUSG00000029478.15	Ncor2	0.00690941	0.0367972	1	0.535	0.465	chr5	-	SE	exonStart_0base 125019818 exonEnd 125020046 upstreamES 125018810 upstreamEE 125018990 downstreamES 125022870 downstreamEE 125022924	https://betsholtzlab.org/Publications/MouseKidenyOB/splicing/GE_Lean_6w_vs_GE_Obese_6w/SE/286_Ncor2_chr5_125022871_125022924_-@chr5_125019819_125020046_-@chr5_125018811_125018990_-.pdf	Online figure
ENSMUSG00000034252.13	Senp6	2.78914e-05	0.000695963	0.103	1	-0.897	chr9	+	SE	exonStart_0base 80087429 exonEnd 80087523 upstreamES 80066902 upstreamEE 80067572 downstreamES 80092266 downstreamEE 80092412	https://betsholtzlab.org/Publications/MouseKidenyOB/splicing/GE_Lean_6w_vs_GE_Obese_6w/SE/287_Senp6_chr9_80066903_80067572_+@chr9_80087430_80087523_+@chr9_80092267_80092412_+.pdf	Online figure
ENSMUSG00000059518.13	Znhit1	0.00182666	0.0139139	0.17	0.699	-0.529	chr5	-	SE	exonStart_0base 136986125 exonEnd 136986255 upstreamES 136984878 upstreamEE 136985049 downstreamES 136986810 downstreamEE 136987232	https://betsholtzlab.org/Publications/MouseKidenyOB/splicing/GE_Lean_6w_vs_GE_Obese_6w/SE/288_Znhit1_chr5_136986811_136987232_-@chr5_136986126_136986255_-@chr5_136984879_136985049_-.pdf	Online figure
ENSMUSG00000040842.16	Szrd1	9.52311e-05	0.00155294	0.248	1	-0.752	chr4	-	SE	exonStart_0base 141120323 exonEnd 141120373 upstreamES 141118526 upstreamEE 141118778 downstreamES 141139691 downstreamEE 141139727	https://betsholtzlab.org/Publications/MouseKidenyOB/splicing/GE_Lean_6w_vs_GE_Obese_6w/SE/289_Szrd1_chr4_141139692_141139727_-@chr4_141120324_141120373_-@chr4_141118527_141118778_-.pdf	Online figure
ENSMUSG00000040123.15	Zmym5	8.46008e-05	0.00141958	0.592	0.114	0.478	chr14	-	SE	exonStart_0base 56810739 exonEnd 56810859 upstreamES 56804414 upstreamEE 56804863 downstreamES 56811333 downstreamEE 56811464	https://betsholtzlab.org/Publications/MouseKidenyOB/splicing/GE_Lean_6w_vs_GE_Obese_6w/SE/290_Zmym5_chr14_56811334_56811464_-@chr14_56810740_56810859_-@chr14_56804415_56804863_-.pdf	Online figure
ENSMUSG00000043962.15	Thrap3	0.00241518	0.0171342	0.586	0.063	0.523	chr4	-	SE	exonStart_0base 126173136 exonEnd 126173329 upstreamES 126171693 upstreamEE 126171881 downstreamES 126173443 downstreamEE 126173527	https://betsholtzlab.org/Publications/MouseKidenyOB/splicing/GE_Lean_6w_vs_GE_Obese_6w/SE/291_Thrap3_chr4_126173444_126173527_-@chr4_126173137_126173329_-@chr4_126171694_126171881_-.pdf	Online figure
ENSMUSG00000039463.13	Slc9a8	0.000856005	0.00797973	0.245	1	-0.755	chr2	+	SE	exonStart_0base 167445505 exonEnd 167445607 upstreamES 167443448 upstreamEE 167443532 downstreamES 167451206 downstreamEE 167451350	https://betsholtzlab.org/Publications/MouseKidenyOB/splicing/GE_Lean_6w_vs_GE_Obese_6w/SE/292_Slc9a8_chr2_167443449_167443532_+@chr2_167445506_167445607_+@chr2_167451207_167451350_+.pdf	Online figure
ENSMUSG00000039463.13	Slc9a8	0.000108439	0.00170585	0.132	1	-0.868	chr2	+	SE	exonStart_0base 167468963 exonEnd 167469075 upstreamES 167467684 upstreamEE 167467767 downstreamES 167471381 downstreamEE 167471602	https://betsholtzlab.org/Publications/MouseKidenyOB/splicing/GE_Lean_6w_vs_GE_Obese_6w/SE/293_Slc9a8_chr2_167467685_167467767_+@chr2_167468964_167469075_+@chr2_167471382_167471602_+.pdf	Online figure
ENSMUSG00000041220.9	Elovl6	5.84879e-05	0.00107488	0	1	-1	chr3	+	SE	exonStart_0base 129548827 exonEnd 129548920 upstreamES 129532726 upstreamEE 129532768 downstreamES 129605040 downstreamEE 129605172	https://betsholtzlab.org/Publications/MouseKidenyOB/splicing/GE_Lean_6w_vs_GE_Obese_6w/SE/294_Elovl6_chr3_129532727_129532768_+@chr3_129548828_129548920_+@chr3_129605041_129605172_+.pdf	Online figure
ENSMUSG00000049606.15	Zfp644	1.32953e-05	0.000452743	0.485	1	-0.515	chr5	-	SE	exonStart_0base 106666784 exonEnd 106666845 upstreamES 106635609 upstreamEE 106638635 downstreamES 106696531 downstreamEE 106696597	https://betsholtzlab.org/Publications/MouseKidenyOB/splicing/GE_Lean_6w_vs_GE_Obese_6w/SE/295_Zfp644_chr5_106696532_106696597_-@chr5_106666785_106666845_-@chr5_106635610_106638635_-.pdf	Online figure
ENSMUSG00000039068.15	Zzz3	0.00738439	0.0385103	0.521	1	-0.479	chr3	+	SE	exonStart_0base 152422617 exonEnd 152422771 upstreamES 152420014 upstreamEE 152420140 downstreamES 152446628 downstreamEE 152446689	https://betsholtzlab.org/Publications/MouseKidenyOB/splicing/GE_Lean_6w_vs_GE_Obese_6w/SE/296_Zzz3_chr3_152420015_152420140_+@chr3_152422618_152422771_+@chr3_152446629_152446689_+.pdf	Online figure
ENSMUSG00000039068.15	Zzz3	1.3517e-09	1.30416e-06	1	0	1	chr3	+	SE	exonStart_0base 152446798 exonEnd 152446937 upstreamES 152420014 upstreamEE 152420140 downstreamES 152448778 downstreamEE 152448826	https://betsholtzlab.org/Publications/MouseKidenyOB/splicing/GE_Lean_6w_vs_GE_Obese_6w/SE/297_Zzz3_chr3_152420015_152420140_+@chr3_152446799_152446937_+@chr3_152448779_152448826_+.pdf	Online figure
ENSMUSG00000037022.2	Mmaa	0.00511527	0.029854	0.526	1	-0.474	chr8	-	SE	exonStart_0base 79269132 exonEnd 79269282 upstreamES 79266423 upstreamEE 79268215 downstreamES 79270889 downstreamEE 79270975	https://betsholtzlab.org/Publications/MouseKidenyOB/splicing/GE_Lean_6w_vs_GE_Obese_6w/SE/298_Mmaa_chr8_79270890_79270975_-@chr8_79269133_79269282_-@chr8_79266424_79268215_-.pdf	Online figure
ENSMUSG00000055799.12	Tcf7l1	0.00103269	0.00905792	0	0.418	-0.418	chr6	-	SE	exonStart_0base 72648800 exonEnd 72648842 upstreamES 72634099 upstreamEE 72634232 downstreamES 72649119 downstreamEE 72649203	https://betsholtzlab.org/Publications/MouseKidenyOB/splicing/GE_Lean_6w_vs_GE_Obese_6w/SE/299_Tcf7l1_chr6_72649120_72649203_-@chr6_72648801_72648842_-@chr6_72634100_72634232_-.pdf	Online figure
ENSMUSG00000035495.14	Tstd2	0.000708019	0.00691184	0.515	0	0.515	chr4	-	SE	exonStart_0base 46133381 exonEnd 46133655 upstreamES 46132145 upstreamEE 46132156 downstreamES 46135386 downstreamEE 46135778	https://betsholtzlab.org/Publications/MouseKidenyOB/splicing/GE_Lean_6w_vs_GE_Obese_6w/SE/300_Tstd2_chr4_46135387_46135778_-@chr4_46133382_46133655_-@chr4_46132146_46132156_-.pdf	Online figure
ENSMUSG00000026027.12	Stradb	2.08262e-05	0.000576855	1	0.129	0.871	chr1	+	SE	exonStart_0base 58992203 exonEnd 58992375 upstreamES 58991012 upstreamEE 58991136 downstreamES 58992650 downstreamEE 58992755	https://betsholtzlab.org/Publications/MouseKidenyOB/splicing/GE_Lean_6w_vs_GE_Obese_6w/SE/301_Stradb_chr1_58991013_58991136_+@chr1_58992204_58992375_+@chr1_58992651_58992755_+.pdf	Online figure
ENSMUSG00000033565.15	Rbfox2	2.14823e-05	0.000581126	0.269	1	-0.731	chr15	-	SE	exonStart_0base 77231386 exonEnd 77231437 upstreamES 77132716 upstreamEE 77132941 downstreamES 77306363 downstreamEE 77307053	https://betsholtzlab.org/Publications/MouseKidenyOB/splicing/GE_Lean_6w_vs_GE_Obese_6w/SE/302_Rbfox2_chr15_77306364_77307053_-@chr15_77231387_77231437_-@chr15_77132717_77132941_-.pdf	Online figure
ENSMUSG00000054426.10	A930005H10Rik	0.00322788	0.0213557	1	0.411	0.589	chr3	-	SE	exonStart_0base 115886213 exonEnd 115886375 upstreamES 115881580 upstreamEE 115881838 downstreamES 115887775 downstreamEE 115888094	https://betsholtzlab.org/Publications/MouseKidenyOB/splicing/GE_Lean_6w_vs_GE_Obese_6w/SE/303_A930005H10Rik_chr3_115887776_115888094_-@chr3_115886214_115886375_-@chr3_115881581_115881838_-.pdf	Online figure
ENSMUSG00000032913.12	Lrig2	6.50789e-05	0.00116278	1	0	1	chr3	-	SE	exonStart_0base 104463489 exonEnd 104463551 upstreamES 104462658 upstreamEE 104462808 downstreamES 104463858 downstreamEE 104464308	https://betsholtzlab.org/Publications/MouseKidenyOB/splicing/GE_Lean_6w_vs_GE_Obese_6w/SE/304_Lrig2_chr3_104463859_104464308_-@chr3_104463490_104463551_-@chr3_104462659_104462808_-.pdf	Online figure
ENSMUSG00000029521.6	Chek2	3.48974e-06	0.000203675	0.687	0.055	0.632	chr5	+	SE	exonStart_0base 110840410 exonEnd 110840540 upstreamES 110839978 upstreamEE 110840048 downstreamES 110841205 downstreamEE 110841333	https://betsholtzlab.org/Publications/MouseKidenyOB/splicing/GE_Lean_6w_vs_GE_Obese_6w/SE/305_Chek2_chr5_110839979_110840048_+@chr5_110840411_110840540_+@chr5_110841206_110841333_+.pdf	Online figure
ENSMUSG00000023707.12	Ogfod2	0.00128916	0.0108308	0.791	0.316	0.475	chr5	+	SE	exonStart_0base 124114064 exonEnd 124114192 upstreamES 124113428 upstreamEE 124113528 downstreamES 124114387 downstreamEE 124114645	https://betsholtzlab.org/Publications/MouseKidenyOB/splicing/GE_Lean_6w_vs_GE_Obese_6w/SE/306_Ogfod2_chr5_124113429_124113528_+@chr5_124114065_124114192_+@chr5_124114388_124114645_+.pdf	Online figure
ENSMUSG00000036792.11	Mbd5	1.52861e-07	3.1604e-05	0	1	-1	chr2	+	SE	exonStart_0base 49278580 exonEnd 49279783 upstreamES 49274562 upstreamEE 49274774 downstreamES 49298655 downstreamEE 49298729	https://betsholtzlab.org/Publications/MouseKidenyOB/splicing/GE_Lean_6w_vs_GE_Obese_6w/SE/307_Mbd5_chr2_49274563_49274774_+@chr2_49278581_49279783_+@chr2_49298656_49298729_+.pdf	Online figure
ENSMUSG00000027007.15	Ssfa2	3.18968e-05	0.000707858	1	0.233	0.767	chr2	+	SE	exonStart_0base 79661638 exonEnd 79661704 upstreamES 79660853 upstreamEE 79661004 downstreamES 79662308 downstreamEE 79662764	https://betsholtzlab.org/Publications/MouseKidenyOB/splicing/GE_Lean_6w_vs_GE_Obese_6w/SE/308_Ssfa2_chr2_79660854_79661004_+@chr2_79661639_79661704_+@chr2_79662309_79662764_+.pdf	Online figure
ENSMUSG00000023286.15	Ube2j2	4.27253e-05	0.000873982	0	1	-1	chr4	+	SE	exonStart_0base 155944539 exonEnd 155944634 upstreamES 155943863 upstreamEE 155944013 downstreamES 155946254 downstreamEE 155946417	https://betsholtzlab.org/Publications/MouseKidenyOB/splicing/GE_Lean_6w_vs_GE_Obese_6w/SE/309_Ube2j2_chr4_155943864_155944013_+@chr4_155944540_155944634_+@chr4_155946255_155946417_+.pdf	Online figure
ENSMUSG00000023286.15	Ube2j2	0.000441456	0.00495269	0.551	1	-0.449	chr4	+	SE	exonStart_0base 155956367 exonEnd 155956448 upstreamES 155955421 upstreamEE 155955560 downstreamES 155957080 downstreamEE 155957101	https://betsholtzlab.org/Publications/MouseKidenyOB/splicing/GE_Lean_6w_vs_GE_Obese_6w/SE/310_Ube2j2_chr4_155955422_155955560_+@chr4_155956368_155956448_+@chr4_155957081_155957101_+.pdf	Online figure
ENSMUSG00000034343.13	Ube2f	0.000135257	0.00203377	0	0.485	-0.485	chr1	+	SE	exonStart_0base 91253759 exonEnd 91253827 upstreamES 91250310 upstreamEE 91250437 downstreamES 91254259 downstreamEE 91254393	https://betsholtzlab.org/Publications/MouseKidenyOB/splicing/GE_Lean_6w_vs_GE_Obese_6w/SE/311_Ube2f_chr1_91250311_91250437_+@chr1_91253760_91253827_+@chr1_91254260_91254393_+.pdf	Online figure
ENSMUSG00000026788.12	Zbtb43	8.35737e-06	0.000338327	0	1	-1	chr2	-	SE	exonStart_0base 33462265 exonEnd 33462357 upstreamES 33453521 upstreamEE 33455123 downstreamES 33464913 downstreamEE 33464974	https://betsholtzlab.org/Publications/MouseKidenyOB/splicing/GE_Lean_6w_vs_GE_Obese_6w/SE/312_Zbtb43_chr2_33464914_33464974_-@chr2_33462266_33462357_-@chr2_33453522_33455123_-.pdf	Online figure
ENSMUSG00000033114.10	Slc35d2	0.00269013	0.0185175	0.509	1	-0.491	chr13	-	SE	exonStart_0base 64111515 exonEnd 64111584 upstreamES 64108324 upstreamEE 64108427 downstreamES 64112929 downstreamEE 64113001	https://betsholtzlab.org/Publications/MouseKidenyOB/splicing/GE_Lean_6w_vs_GE_Obese_6w/SE/313_Slc35d2_chr13_64112930_64113001_-@chr13_64111516_64111584_-@chr13_64108325_64108427_-.pdf	Online figure
ENSMUSG00000024908.13	Ppp6r3	0.0018324	0.0139189	1	0.519	0.481	chr19	-	SE	exonStart_0base 3478277 exonEnd 3478364 upstreamES 3473768 upstreamEE 3473815 downstreamES 3484830 downstreamEE 3484916	https://betsholtzlab.org/Publications/MouseKidenyOB/splicing/GE_Lean_6w_vs_GE_Obese_6w/SE/314_Ppp6r3_chr19_3484831_3484916_-@chr19_3478278_3478364_-@chr19_3473769_3473815_-.pdf	Online figure
ENSMUSG00000021614.15	Vcan	4.96413e-06	0.000254116	1	0	1	chr13	-	SE	exonStart_0base 89702917 exonEnd 89705797 upstreamES 89685078 upstreamEE 89685192 downstreamES 89712204 downstreamEE 89712498	https://betsholtzlab.org/Publications/MouseKidenyOB/splicing/GE_Lean_6w_vs_GE_Obese_6w/SE/315_Vcan_chr13_89712205_89712498_-@chr13_89702918_89705797_-@chr13_89685079_89685192_-.pdf	Online figure
ENSMUSG00000021614.15	Vcan	6.5e-07	6.75645e-05	1	0	1	chr13	-	SE	exonStart_0base 89702917 exonEnd 89705797 upstreamES 89688284 upstreamEE 89693501 downstreamES 89712204 downstreamEE 89712498	https://betsholtzlab.org/Publications/MouseKidenyOB/splicing/GE_Lean_6w_vs_GE_Obese_6w/SE/316_Vcan_chr13_89712205_89712498_-@chr13_89702918_89705797_-@chr13_89688285_89693501_-.pdf	Online figure
ENSMUSG00000029199.10	Lias	3.65892e-07	5.46271e-05	0.446	1	-0.554	chr5	+	SE	exonStart_0base 65392219 exonEnd 65392243 upstreamES 65391564 upstreamEE 65391673 downstreamES 65392334 downstreamEE 65392389	https://betsholtzlab.org/Publications/MouseKidenyOB/splicing/GE_Lean_6w_vs_GE_Obese_6w/SE/317_Lias_chr5_65391565_65391673_+@chr5_65392220_65392243_+@chr5_65392335_65392389_+.pdf	Online figure
ENSMUSG00000045100.10	Slc25a26	4.06647e-06	0.000223764	1	0	1	chr6	+	SE	exonStart_0base 94513804 exonEnd 94514041 upstreamES 94510751 upstreamEE 94510861 downstreamES 94534143 downstreamEE 94534248	https://betsholtzlab.org/Publications/MouseKidenyOB/splicing/GE_Lean_6w_vs_GE_Obese_6w/SE/318_Slc25a26_chr6_94510752_94510861_+@chr6_94513805_94514041_+@chr6_94534144_94534248_+.pdf	Online figure
ENSMUSG00000034771.14	Tle2	3.34843e-05	0.000731474	1	0.304	0.696	chr10	+	SE	exonStart_0base 81577628 exonEnd 81577691 upstreamES 81576528 upstreamEE 81576642 downstreamES 81580256 downstreamEE 81580298	https://betsholtzlab.org/Publications/MouseKidenyOB/splicing/GE_Lean_6w_vs_GE_Obese_6w/SE/319_Tle2_chr10_81576529_81576642_+@chr10_81577629_81577691_+@chr10_81580257_81580298_+.pdf	Online figure
ENSMUSG00000040998.17	Npnt	1.08268e-05	0.000391729	0	1	-1	chr3	-	SE	exonStart_0base 132914372 exonEnd 132914465 upstreamES 132909895 upstreamEE 132910015 downstreamES 132917460 downstreamEE 132917553	https://betsholtzlab.org/Publications/MouseKidenyOB/splicing/GE_Lean_6w_vs_GE_Obese_6w/SE/320_Npnt_chr3_132917461_132917553_-@chr3_132914373_132914465_-@chr3_132909896_132910015_-.pdf	Online figure
ENSMUSG00000001844.9	Zdhhc4	0.0044274	0.0270932	0.831	0.313	0.518	chr5	-	SE	exonStart_0base 143328677 exonEnd 143328897 upstreamES 143328390 upstreamEE 143328570 downstreamES 143329098 downstreamEE 143329223	https://betsholtzlab.org/Publications/MouseKidenyOB/splicing/GE_Lean_6w_vs_GE_Obese_6w/SE/321_Zdhhc4_chr5_143329099_143329223_-@chr5_143328678_143328897_-@chr5_143328391_143328570_-.pdf	Online figure
ENSMUSG00000097284.6	4930480K23Rik	0.000627615	0.00637415	0.297	1	-0.703	chr14	+	SE	exonStart_0base 69740724 exonEnd 69740849 upstreamES 69738237 upstreamEE 69738387 downstreamES 69767064 downstreamEE 69767113	https://betsholtzlab.org/Publications/MouseKidenyOB/splicing/GE_Lean_6w_vs_GE_Obese_6w/SE/322_4930480K23Rik_chr14_69738238_69738387_+@chr14_69740725_69740849_+@chr14_69767065_69767113_+.pdf	Online figure
ENSMUSG00000050619.13	Zscan29	0.000653929	0.00650938	0.47	1	-0.53	chr2	-	SE	exonStart_0base 121169198 exonEnd 121169403 upstreamES 121166043 upstreamEE 121166718 downstreamES 121169809 downstreamEE 121170268	https://betsholtzlab.org/Publications/MouseKidenyOB/splicing/GE_Lean_6w_vs_GE_Obese_6w/SE/323_Zscan29_chr2_121169810_121170268_-@chr2_121169199_121169403_-@chr2_121166044_121166718_-.pdf	Online figure
ENSMUSG00000020838.11	Slc6a4	4.24208e-06	0.000225297	1	0	1	chr11	+	SE	exonStart_0base 77023174 exonEnd 77023275 upstreamES 77021390 upstreamEE 77021490 downstreamES 77027083 downstreamEE 77027251	https://betsholtzlab.org/Publications/MouseKidenyOB/splicing/GE_Lean_6w_vs_GE_Obese_6w/SE/324_Slc6a4_chr11_77021391_77021490_+@chr11_77023175_77023275_+@chr11_77027084_77027251_+.pdf	Online figure
ENSMUSG00000029924.11	Slc37a3	5.29947e-05	0.00100257	1	0	1	chr6	-	SE	exonStart_0base 39367643 exonEnd 39367766 upstreamES 39366888 upstreamEE 39367046 downstreamES 39372078 downstreamEE 39372137	https://betsholtzlab.org/Publications/MouseKidenyOB/splicing/GE_Lean_6w_vs_GE_Obese_6w/SE/325_Slc37a3_chr6_39372079_39372137_-@chr6_39367644_39367766_-@chr6_39366889_39367046_-.pdf	Online figure
ENSMUSG00000037514.16	Pank2	0.00578698	0.032462	0	0.49	-0.49	chr2	+	SE	exonStart_0base 131288581 exonEnd 131288685 upstreamES 131287473 upstreamEE 131287597 downstreamES 131293398 downstreamEE 131293524	https://betsholtzlab.org/Publications/MouseKidenyOB/splicing/GE_Lean_6w_vs_GE_Obese_6w/SE/326_Pank2_chr2_131287474_131287597_+@chr2_131288582_131288685_+@chr2_131293399_131293524_+.pdf	Online figure
ENSMUSG00000039943.15	Plcb4	0.00549794	0.0314191	0.534	1	-0.466	chr2	+	SE	exonStart_0base 135939946 exonEnd 135940004 upstreamES 135939209 upstreamEE 135939310 downstreamES 135947045 downstreamEE 135947154	https://betsholtzlab.org/Publications/MouseKidenyOB/splicing/GE_Lean_6w_vs_GE_Obese_6w/SE/327_Plcb4_chr2_135939210_135939310_+@chr2_135939947_135940004_+@chr2_135947046_135947154_+.pdf	Online figure
ENSMUSG00000036054.14	Sugp2	0.000326439	0.00395346	1	0.351	0.649	chr8	+	SE	exonStart_0base 70261230 exonEnd 70261317 upstreamES 70260441 upstreamEE 70260589 downstreamES 70262870 downstreamEE 70263105	https://betsholtzlab.org/Publications/MouseKidenyOB/splicing/GE_Lean_6w_vs_GE_Obese_6w/SE/328_Sugp2_chr8_70260442_70260589_+@chr8_70261231_70261317_+@chr8_70262871_70263105_+.pdf	Online figure
ENSMUSG00000039158.11	Akna	0.00102369	0.00900627	0	0.682	-0.682	chr4	-	SE	exonStart_0base 63371796 exonEnd 63371892 upstreamES 63370891 upstreamEE 63371011 downstreamES 63373322 downstreamEE 63373469	https://betsholtzlab.org/Publications/MouseKidenyOB/splicing/GE_Lean_6w_vs_GE_Obese_6w/SE/329_Akna_chr4_63373323_63373469_-@chr4_63371797_63371892_-@chr4_63370892_63371011_-.pdf	Online figure
ENSMUSG00000027455.15	Nsfl1c	0.000125695	0.00190484	0.233	1	-0.767	chr2	+	SE	exonStart_0base 151503013 exonEnd 151503179 upstreamES 151500714 upstreamEE 151500789 downstreamES 151505352 downstreamEE 151505462	https://betsholtzlab.org/Publications/MouseKidenyOB/splicing/GE_Lean_6w_vs_GE_Obese_6w/SE/330_Nsfl1c_chr2_151500715_151500789_+@chr2_151503014_151503179_+@chr2_151505353_151505462_+.pdf	Online figure
ENSMUSG00000027620.15	Rbm39	0.000474275	0.0052156	0	0.452	-0.452	chr2	-	SE	exonStart_0base 156176402 exonEnd 156176457 upstreamES 156174096 upstreamEE 156174168 downstreamES 156177335 downstreamEE 156177385	https://betsholtzlab.org/Publications/MouseKidenyOB/splicing/GE_Lean_6w_vs_GE_Obese_6w/SE/331_Rbm39_chr2_156177336_156177385_-@chr2_156176403_156176457_-@chr2_156174097_156174168_-.pdf	Online figure
ENSMUSG00000027620.15	Rbm39	1.6741e-05	0.0005074	0	0.485	-0.485	chr2	-	SE	exonStart_0base 156176402 exonEnd 156176457 upstreamES 156174773 upstreamEE 156174974 downstreamES 156177335 downstreamEE 156177385	https://betsholtzlab.org/Publications/MouseKidenyOB/splicing/GE_Lean_6w_vs_GE_Obese_6w/SE/332_Rbm39_chr2_156177336_156177385_-@chr2_156176403_156176457_-@chr2_156174774_156174974_-.pdf	Online figure
ENSMUSG00000028106.12	Rprd2	0.00652199	0.0352429	1	0.536	0.464	chr3	-	SE	exonStart_0base 95786319 exonEnd 95786397 upstreamES 95785053 upstreamEE 95785106 downstreamES 95787283 downstreamEE 95787384	https://betsholtzlab.org/Publications/MouseKidenyOB/splicing/GE_Lean_6w_vs_GE_Obese_6w/SE/333_Rprd2_chr3_95787284_95787384_-@chr3_95786320_95786397_-@chr3_95785054_95785106_-.pdf	Online figure
ENSMUSG00000028106.12	Rprd2	0.00113631	0.00978883	1	0.289	0.711	chr3	-	SE	exonStart_0base 95786319 exonEnd 95786451 upstreamES 95785053 upstreamEE 95785106 downstreamES 95787283 downstreamEE 95787384	https://betsholtzlab.org/Publications/MouseKidenyOB/splicing/GE_Lean_6w_vs_GE_Obese_6w/SE/334_Rprd2_chr3_95787284_95787384_-@chr3_95786320_95786451_-@chr3_95785054_95785106_-.pdf	Online figure
ENSMUSG00000038241.15	Cep250	3.20537e-07	5.0151e-05	1	0	1	chr2	+	SE	exonStart_0base 155976083 exonEnd 155976211 upstreamES 155975670 upstreamEE 155975864 downstreamES 155976388 downstreamEE 155976558	https://betsholtzlab.org/Publications/MouseKidenyOB/splicing/GE_Lean_6w_vs_GE_Obese_6w/SE/335_Cep250_chr2_155975671_155975864_+@chr2_155976084_155976211_+@chr2_155976389_155976558_+.pdf	Online figure
ENSMUSG00000061689.14	Dlgap4	0.00474067	0.0284686	0.432	1	-0.568	chr2	+	SE	exonStart_0base 156748022 exonEnd 156748102 upstreamES 156745834 upstreamEE 156746196 downstreamES 156748943 downstreamEE 156749356	https://betsholtzlab.org/Publications/MouseKidenyOB/splicing/GE_Lean_6w_vs_GE_Obese_6w/SE/336_Dlgap4_chr2_156745835_156746196_+@chr2_156748023_156748102_+@chr2_156748944_156749356_+.pdf	Online figure
ENSMUSG00000061689.14	Dlgap4	0.0102847	0.0487217	0.578	1	-0.422	chr2	+	SE	exonStart_0base 156748022 exonEnd 156748420 upstreamES 156745834 upstreamEE 156746196 downstreamES 156748943 downstreamEE 156749332	https://betsholtzlab.org/Publications/MouseKidenyOB/splicing/GE_Lean_6w_vs_GE_Obese_6w/SE/337_Dlgap4_chr2_156745835_156746196_+@chr2_156748023_156748420_+@chr2_156748944_156749332_+.pdf	Online figure
ENSMUSG00000061689.14	Dlgap4	0.0100032	0.0479373	0.587	1	-0.413	chr2	+	SE	exonStart_0base 156748331 exonEnd 156748420 upstreamES 156745834 upstreamEE 156746196 downstreamES 156748943 downstreamEE 156749020	https://betsholtzlab.org/Publications/MouseKidenyOB/splicing/GE_Lean_6w_vs_GE_Obese_6w/SE/338_Dlgap4_chr2_156745835_156746196_+@chr2_156748332_156748420_+@chr2_156748944_156749020_+.pdf	Online figure
ENSMUSG00000049107.12	Ntf3	0.000646428	0.0064674	0.71	0.155	0.555	chr6	-	SE	exonStart_0base 126164729 exonEnd 126164840 upstreamES 126101411 upstreamEE 126102523 downstreamES 126166539 downstreamEE 126166715	https://betsholtzlab.org/Publications/MouseKidenyOB/splicing/GE_Lean_6w_vs_GE_Obese_6w/SE/339_Ntf3_chr6_126166540_126166715_-@chr6_126164730_126164840_-@chr6_126101412_126102523_-.pdf	Online figure
ENSMUSG00000036617.15	Etl4	0.000232195	0.00303426	0.429	1	-0.571	chr2	+	SE	exonStart_0base 20805774 exonEnd 20807373 upstreamES 20805584 upstreamEE 20805662 downstreamES 20807901 downstreamEE 20808024	https://betsholtzlab.org/Publications/MouseKidenyOB/splicing/GE_Lean_6w_vs_GE_Obese_6w/SE/340_Etl4_chr2_20805585_20805662_+@chr2_20805775_20807373_+@chr2_20807902_20808024_+.pdf	Online figure
ENSMUSG00000055540.14	Epha6	0.00369509	0.0237647	1	0.45	0.55	chr16	-	SE	exonStart_0base 59956868 exonEnd 59956939 upstreamES 59954651 upstreamEE 59954777 downstreamES 59960333 downstreamEE 59960442	https://betsholtzlab.org/Publications/MouseKidenyOB/splicing/GE_Lean_6w_vs_GE_Obese_6w/SE/341_Epha6_chr16_59960334_59960442_-@chr16_59956869_59956939_-@chr16_59954652_59954777_-.pdf	Online figure
ENSMUSG00000031901.11	Dus2	0.010214	0.0484665	1	0.345	0.655	chr8	+	SE	exonStart_0base 106031697 exonEnd 106031741 upstreamES 106030351 upstreamEE 106030443 downstreamES 106033722 downstreamEE 106033783	https://betsholtzlab.org/Publications/MouseKidenyOB/splicing/GE_Lean_6w_vs_GE_Obese_6w/SE/342_Dus2_chr8_106030352_106030443_+@chr8_106031698_106031741_+@chr8_106033723_106033783_+.pdf	Online figure
ENSMUSG00000004233.13	Wars2	0.00140972	0.0115104	0.322	1	-0.678	chr3	+	SE	exonStart_0base 99214655 exonEnd 99214774 upstreamES 99205224 upstreamEE 99205310 downstreamES 99216458 downstreamEE 99219203	https://betsholtzlab.org/Publications/MouseKidenyOB/splicing/GE_Lean_6w_vs_GE_Obese_6w/SE/343_Wars2_chr3_99205225_99205310_+@chr3_99214656_99214774_+@chr3_99216459_99219203_+.pdf	Online figure
ENSMUSG00000055897.12	Ppp4r1l-ps	0.00196323	0.0146458	0.893	0.426	0.467	chr2	-	SE	exonStart_0base 173599589 exonEnd 173599687 upstreamES 173594975 upstreamEE 173597187 downstreamES 173608732 downstreamEE 173608879	https://betsholtzlab.org/Publications/MouseKidenyOB/splicing/GE_Lean_6w_vs_GE_Obese_6w/SE/344_Ppp4r1l-ps_chr2_173608733_173608879_-@chr2_173599590_173599687_-@chr2_173594976_173597187_-.pdf	Online figure
ENSMUSG00000030766.14	Arhgap17	0.00910818	0.0449125	0.916	0.447	0.469	chr7	-	SE	exonStart_0base 123294471 exonEnd 123294705 upstreamES 123292035 upstreamEE 123292205 downstreamES 123296409 downstreamEE 123296566	https://betsholtzlab.org/Publications/MouseKidenyOB/splicing/GE_Lean_6w_vs_GE_Obese_6w/SE/345_Arhgap17_chr7_123296410_123296566_-@chr7_123294472_123294705_-@chr7_123292036_123292205_-.pdf	Online figure
ENSMUSG00000041623.16	D11Wsu47e	3.1323e-05	0.000707858	1	0	1	chr11	+	SE	exonStart_0base 113685189 exonEnd 113685271 upstreamES 113684439 upstreamEE 113684711 downstreamES 113687773 downstreamEE 113688213	https://betsholtzlab.org/Publications/MouseKidenyOB/splicing/GE_Lean_6w_vs_GE_Obese_6w/SE/346_D11Wsu47e_chr11_113684440_113684711_+@chr11_113685190_113685271_+@chr11_113687774_113688213_+.pdf	Online figure
ENSMUSG00000024127.13	Prepl	0.00176407	0.01358	1	0.201	0.799	chr17	-	SE	exonStart_0base 85088339 exonEnd 85088875 upstreamES 85083192 upstreamEE 85083315 downstreamES 85090105 downstreamEE 85090267	https://betsholtzlab.org/Publications/MouseKidenyOB/splicing/GE_Lean_6w_vs_GE_Obese_6w/SE/347_Prepl_chr17_85090106_85090267_-@chr17_85088340_85088875_-@chr17_85083193_85083315_-.pdf	Online figure
ENSMUSG00000043384.14	Gprasp1	0.00026743	0.00337288	0.195	1	-0.805	chrX	+	SE	exonStart_0base 135743562 exonEnd 135743614 upstreamES 135742732 upstreamEE 135742978 downstreamES 135744498 downstreamEE 135744575	https://betsholtzlab.org/Publications/MouseKidenyOB/splicing/GE_Lean_6w_vs_GE_Obese_6w/SE/348_Gprasp1_chrX_135742733_135742978_+@chrX_135743563_135743614_+@chrX_135744499_135744575_+.pdf	Online figure
ENSMUSG00000008200.13	Fnbp4	0.000403478	0.00462522	0.547	1	-0.453	chr2	+	SE	exonStart_0base 90767852 exonEnd 90767955 upstreamES 90767407 upstreamEE 90767541 downstreamES 90768515 downstreamEE 90768700	https://betsholtzlab.org/Publications/MouseKidenyOB/splicing/GE_Lean_6w_vs_GE_Obese_6w/SE/349_Fnbp4_chr2_90767408_90767541_+@chr2_90767853_90767955_+@chr2_90768516_90768700_+.pdf	Online figure
ENSMUSG00000027222.13	Pex16	3.3297e-06	0.000200788	0.58	1	-0.42	chr2	+	SE	exonStart_0base 92380409 exonEnd 92380474 upstreamES 92379215 upstreamEE 92379335 downstreamES 92381035 downstreamEE 92381216	https://betsholtzlab.org/Publications/MouseKidenyOB/splicing/GE_Lean_6w_vs_GE_Obese_6w/SE/350_Pex16_chr2_92379216_92379335_+@chr2_92380410_92380474_+@chr2_92381036_92381216_+.pdf	Online figure
ENSMUSG00000039307.15	Hexdc	1.43517e-05	0.000460188	1	0.059	0.941	chr11	+	SE	exonStart_0base 121220863 exonEnd 121221590 upstreamES 121218542 upstreamEE 121218738 downstreamES 121222212 downstreamEE 121222647	https://betsholtzlab.org/Publications/MouseKidenyOB/splicing/GE_Lean_6w_vs_GE_Obese_6w/SE/351_Hexdc_chr11_121218543_121218738_+@chr11_121220864_121221590_+@chr11_121222213_121222647_+.pdf	Online figure
ENSMUSG00000047213.13	Ythdf3	0.000623981	0.00635955	0	0.428	-0.428	chr3	+	SE	exonStart_0base 16203186 exonEnd 16203219 upstreamES 16189477 upstreamEE 16189563 downstreamES 16203825 downstreamEE 16205424	https://betsholtzlab.org/Publications/MouseKidenyOB/splicing/GE_Lean_6w_vs_GE_Obese_6w/SE/352_Ythdf3_chr3_16189478_16189563_+@chr3_16203187_16203219_+@chr3_16203826_16205424_+.pdf	Online figure
ENSMUSG00000005936.17	Kctd20	0.00137501	0.0113515	0	0.518	-0.518	chr17	+	SE	exonStart_0base 28957878 exonEnd 28958057 upstreamES 28952598 upstreamEE 28952757 downstreamES 28961413 downstreamEE 28961687	https://betsholtzlab.org/Publications/MouseKidenyOB/splicing/GE_Lean_6w_vs_GE_Obese_6w/SE/353_Kctd20_chr17_28952599_28952757_+@chr17_28957879_28958057_+@chr17_28961414_28961687_+.pdf	Online figure
ENSMUSG00000039239.13	Tgfb2	0.00376891	0.0240289	0	0.424	-0.424	chr1	-	SE	exonStart_0base 186690720 exonEnd 186690804 upstreamES 186649734 upstreamEE 186649898 downstreamES 186704428 downstreamEE 186705700	https://betsholtzlab.org/Publications/MouseKidenyOB/splicing/GE_Lean_6w_vs_GE_Obese_6w/SE/354_Tgfb2_chr1_186704429_186705700_-@chr1_186690721_186690804_-@chr1_186649735_186649898_-.pdf	Online figure
ENSMUSG00000042605.14	Atxn2	6.6898e-05	0.00118795	0	1	-1	chr5	+	SE	exonStart_0base 121806221 exonEnd 121806275 upstreamES 121802947 upstreamEE 121803080 downstreamES 121810850 downstreamEE 121810996	https://betsholtzlab.org/Publications/MouseKidenyOB/splicing/GE_Lean_6w_vs_GE_Obese_6w/SE/355_Atxn2_chr5_121802948_121803080_+@chr5_121806222_121806275_+@chr5_121810851_121810996_+.pdf	Online figure
ENSMUSG00000033313.10	Fbxl8	0.00373377	0.0238591	0.594	0.132	0.462	chr8	+	SE	exonStart_0base 105267664 exonEnd 105267866 upstreamES 105266694 upstreamEE 105267165 downstreamES 105268009 downstreamEE 105269170	https://betsholtzlab.org/Publications/MouseKidenyOB/splicing/GE_Lean_6w_vs_GE_Obese_6w/SE/356_Fbxl8_chr8_105266695_105267165_+@chr8_105267665_105267866_+@chr8_105268010_105269170_+.pdf	Online figure
ENSMUSG00000005267.12	Zfp287	0.00142402	0.0115924	0.292	1	-0.708	chr11	-	SE	exonStart_0base 62712149 exonEnd 62712219 upstreamES 62705468 upstreamEE 62705591 downstreamES 62724796 downstreamEE 62724883	https://betsholtzlab.org/Publications/MouseKidenyOB/splicing/GE_Lean_6w_vs_GE_Obese_6w/SE/357_Zfp287_chr11_62724797_62724883_-@chr11_62712150_62712219_-@chr11_62705469_62705591_-.pdf	Online figure
ENSMUSG00000074238.5	Ap1ar	0.000117306	0.00181089	0.142	1	-0.858	chr3	-	SE	exonStart_0base 127815595 exonEnd 127815694 upstreamES 127813239 upstreamEE 127813295 downstreamES 127816909 downstreamEE 127817006	https://betsholtzlab.org/Publications/MouseKidenyOB/splicing/GE_Lean_6w_vs_GE_Obese_6w/SE/358_Ap1ar_chr3_127816910_127817006_-@chr3_127815596_127815694_-@chr3_127813240_127813295_-.pdf	Online figure
ENSMUSG00000038784.12	Cnot4	0.00125694	0.0106225	1	0.499	0.501	chr6	-	SE	exonStart_0base 35024127 exonEnd 35024340 upstreamES 35022070 upstreamEE 35023432 downstreamES 35051061 downstreamEE 35051559	https://betsholtzlab.org/Publications/MouseKidenyOB/splicing/GE_Lean_6w_vs_GE_Obese_6w/SE/359_Cnot4_chr6_35051062_35051559_-@chr6_35024128_35024340_-@chr6_35022071_35023432_-.pdf	Online figure
ENSMUSG00000040044.10	Orc3	2.6471e-06	0.000178187	0	0.486	-0.486	chr4	-	SE	exonStart_0base 34598982 exonEnd 34599140 upstreamES 34598701 upstreamEE 34598756 downstreamES 34599703 downstreamEE 34599808	https://betsholtzlab.org/Publications/MouseKidenyOB/splicing/GE_Lean_6w_vs_GE_Obese_6w/SE/360_Orc3_chr4_34599704_34599808_-@chr4_34598983_34599140_-@chr4_34598702_34598756_-.pdf	Online figure
ENSMUSG00000043015.14	Tmem194b	7.24711e-05	0.00125984	0.152	1	-0.848	chr1	+	SE	exonStart_0base 52643121 exonEnd 52643236 upstreamES 52642318 upstreamEE 52642412 downstreamES 52645260 downstreamEE 52645486	https://betsholtzlab.org/Publications/MouseKidenyOB/splicing/GE_Lean_6w_vs_GE_Obese_6w/SE/361_Tmem194b_chr1_52642319_52642412_+@chr1_52643122_52643236_+@chr1_52645261_52645486_+.pdf	Online figure
ENSMUSG00000043015.14	Tmem194b	2.8393e-05	0.000699433	0.077	1	-0.923	chr1	+	SE	exonStart_0base 52643167 exonEnd 52643236 upstreamES 52642318 upstreamEE 52642412 downstreamES 52645260 downstreamEE 52645486	https://betsholtzlab.org/Publications/MouseKidenyOB/splicing/GE_Lean_6w_vs_GE_Obese_6w/SE/362_Tmem194b_chr1_52642319_52642412_+@chr1_52643168_52643236_+@chr1_52645261_52645486_+.pdf	Online figure
ENSMUSG00000041609.15	Ccdc64	0.000959491	0.00861162	0.406	1	-0.594	chr5	-	SE	exonStart_0base 115651155 exonEnd 115651264 upstreamES 115649266 upstreamEE 115649569 downstreamES 115651818 downstreamEE 115651939	https://betsholtzlab.org/Publications/MouseKidenyOB/splicing/GE_Lean_6w_vs_GE_Obese_6w/SE/363_Ccdc64_chr5_115651819_115651939_-@chr5_115651156_115651264_-@chr5_115649267_115649569_-.pdf	Online figure
ENSMUSG00000024002.15	Brd4	0.00462229	0.0280487	0.513	1	-0.487	chr17	-	SE	exonStart_0base 32253040 exonEnd 32253200 upstreamES 32229416 upstreamEE 32229735 downstreamES 32284517 downstreamEE 32284677	https://betsholtzlab.org/Publications/MouseKidenyOB/splicing/GE_Lean_6w_vs_GE_Obese_6w/SE/364_Brd4_chr17_32284518_32284677_-@chr17_32253041_32253200_-@chr17_32229417_32229735_-.pdf	Online figure
ENSMUSG00000026821.14	Ralgds	0.00282723	0.0192805	0.434	1	-0.566	chr2	+	SE	exonStart_0base 28540710 exonEnd 28540821 upstreamES 28513124 upstreamEE 28513560 downstreamES 28542289 downstreamEE 28542483	https://betsholtzlab.org/Publications/MouseKidenyOB/splicing/GE_Lean_6w_vs_GE_Obese_6w/SE/365_Ralgds_chr2_28513125_28513560_+@chr2_28540711_28540821_+@chr2_28542290_28542483_+.pdf	Online figure
ENSMUSG00000048874.14	Phf3	6.80887e-05	0.0012054	1	0.317	0.683	chr1	-	SE	exonStart_0base 30837104 exonEnd 30837266 upstreamES 30824209 upstreamEE 30824519 downstreamES 30862986 downstreamEE 30863255	https://betsholtzlab.org/Publications/MouseKidenyOB/splicing/GE_Lean_6w_vs_GE_Obese_6w/SE/366_Phf3_chr1_30862987_30863255_-@chr1_30837105_30837266_-@chr1_30824210_30824519_-.pdf	Online figure
ENSMUSG00000009575.13	Cbx5	0.000158618	0.00228987	0.141	1	-0.859	chr15	-	SE	exonStart_0base 103215021 exonEnd 103215121 upstreamES 103213071 upstreamEE 103213254 downstreamES 103215267 downstreamEE 103215305	https://betsholtzlab.org/Publications/MouseKidenyOB/splicing/GE_Lean_6w_vs_GE_Obese_6w/SE/367_Cbx5_chr15_103215268_103215305_-@chr15_103215022_103215121_-@chr15_103213072_103213254_-.pdf	Online figure
ENSMUSG00000009575.13	Cbx5	0.000150395	0.00219858	0.138	1	-0.862	chr15	-	SE	exonStart_0base 103215021 exonEnd 103215125 upstreamES 103213081 upstreamEE 103213254 downstreamES 103215267 downstreamEE 103215366	https://betsholtzlab.org/Publications/MouseKidenyOB/splicing/GE_Lean_6w_vs_GE_Obese_6w/SE/368_Cbx5_chr15_103215268_103215366_-@chr15_103215022_103215125_-@chr15_103213082_103213254_-.pdf	Online figure
ENSMUSG00000064127.12	Med14	1.70528e-06	0.000128206	0	1	-1	chrX	-	SE	exonStart_0base 12689328 exonEnd 12689460 upstreamES 12687018 upstreamEE 12687201 downstreamES 12693584 downstreamEE 12693696	https://betsholtzlab.org/Publications/MouseKidenyOB/splicing/GE_Lean_6w_vs_GE_Obese_6w/SE/369_Med14_chrX_12693585_12693696_-@chrX_12689329_12689460_-@chrX_12687019_12687201_-.pdf	Online figure
ENSMUSG00000024055.13	Cyp4f13	9.89076e-05	0.00159952	1	0.476	0.524	chr17	-	SE	exonStart_0base 32941055 exonEnd 32941200 upstreamES 32930540 upstreamEE 32930662 downstreamES 32946804 downstreamEE 32947003	https://betsholtzlab.org/Publications/MouseKidenyOB/splicing/GE_Lean_6w_vs_GE_Obese_6w/SE/370_Cyp4f13_chr17_32946805_32947003_-@chr17_32941056_32941200_-@chr17_32930541_32930662_-.pdf	Online figure
ENSMUSG00000038215.13	Cep44	0.000196098	0.00269646	0.731	0	0.731	chr8	-	SE	exonStart_0base 56550062 exonEnd 56550121 upstreamES 56547387 upstreamEE 56547524 downstreamES 56550544 downstreamEE 56551047	https://betsholtzlab.org/Publications/MouseKidenyOB/splicing/GE_Lean_6w_vs_GE_Obese_6w/SE/371_Cep44_chr8_56550545_56551047_-@chr8_56550063_56550121_-@chr8_56547388_56547524_-.pdf	Online figure
ENSMUSG00000038215.13	Cep44	0.00203651	0.0150566	0.514	0	0.514	chr8	-	SE	exonStart_0base 56550062 exonEnd 56550121 upstreamES 56547387 upstreamEE 56547524 downstreamES 56550687 downstreamEE 56550799	https://betsholtzlab.org/Publications/MouseKidenyOB/splicing/GE_Lean_6w_vs_GE_Obese_6w/SE/372_Cep44_chr8_56550688_56550799_-@chr8_56550063_56550121_-@chr8_56547388_56547524_-.pdf	Online figure
ENSMUSG00000049755.13	Zfp672	9.45279e-05	0.0015502	0.406	1	-0.594	chr11	-	SE	exonStart_0base 58322599 exonEnd 58322729 upstreamES 58319323 upstreamEE 58319590 downstreamES 58323269 downstreamEE 58323314	https://betsholtzlab.org/Publications/MouseKidenyOB/splicing/GE_Lean_6w_vs_GE_Obese_6w/SE/373_Zfp672_chr11_58323270_58323314_-@chr11_58322600_58322729_-@chr11_58319324_58319590_-.pdf	Online figure
ENSMUSG00000059475.12	Zfp426	0.00485347	0.0287876	0.271	1	-0.729	chr9	-	SE	exonStart_0base 20476395 exonEnd 20476478 upstreamES 20473027 upstreamEE 20473108 downstreamES 20478132 downstreamEE 20478157	https://betsholtzlab.org/Publications/MouseKidenyOB/splicing/GE_Lean_6w_vs_GE_Obese_6w/SE/374_Zfp426_chr9_20478133_20478157_-@chr9_20476396_20476478_-@chr9_20473028_20473108_-.pdf	Online figure
ENSMUSG00000074284.6	Gm10658	1.93133e-05	0.000548062	0	1	-1	chr9	-	SE	exonStart_0base 57057268 exonEnd 57057801 upstreamES 57056629 upstreamEE 57057138 downstreamES 57071608 downstreamEE 57071807	https://betsholtzlab.org/Publications/MouseKidenyOB/splicing/GE_Lean_6w_vs_GE_Obese_6w/SE/375_Gm10658_chr9_57071609_57071807_-@chr9_57057269_57057801_-@chr9_57056630_57057138_-.pdf	Online figure
ENSMUSG00000019338.12	Zfp687	2.33788e-05	0.000612397	0	1	-1	chr3	-	SE	exonStart_0base 95013832 exonEnd 95013928 upstreamES 95011839 upstreamEE 95012476 downstreamES 95015319 downstreamEE 95015448	https://betsholtzlab.org/Publications/MouseKidenyOB/splicing/GE_Lean_6w_vs_GE_Obese_6w/SE/376_Zfp687_chr3_95015320_95015448_-@chr3_95013833_95013928_-@chr3_95011840_95012476_-.pdf	Online figure
ENSMUSG00000036940.14	Kdm1a	1.42997e-05	0.000460188	0	1	-1	chr4	-	SE	exonStart_0base 136582039 exonEnd 136582099 upstreamES 136577070 upstreamEE 136577204 downstreamES 136592964 downstreamEE 136593130	https://betsholtzlab.org/Publications/MouseKidenyOB/splicing/GE_Lean_6w_vs_GE_Obese_6w/SE/377_Kdm1a_chr4_136592965_136593130_-@chr4_136582040_136582099_-@chr4_136577071_136577204_-.pdf	Online figure
ENSMUSG00000028863.12	Meaf6	0.00183454	0.0139189	0.55	1	-0.45	chr4	+	SE	exonStart_0base 125107651 exonEnd 125107709 upstreamES 125102838 upstreamEE 125103031 downstreamES 125108322 downstreamEE 125108356	https://betsholtzlab.org/Publications/MouseKidenyOB/splicing/GE_Lean_6w_vs_GE_Obese_6w/SE/378_Meaf6_chr4_125102839_125103031_+@chr4_125107652_125107709_+@chr4_125108323_125108356_+.pdf	Online figure
ENSMUSG00000034321.12	Exosc1	0.000966219	0.00862002	0.252	1	-0.748	chr19	-	SE	exonStart_0base 41926531 exonEnd 41926565 upstreamES 41925188 upstreamEE 41925239 downstreamES 41931355 downstreamEE 41931430	https://betsholtzlab.org/Publications/MouseKidenyOB/splicing/GE_Lean_6w_vs_GE_Obese_6w/SE/379_Exosc1_chr19_41931356_41931430_-@chr19_41926532_41926565_-@chr19_41925189_41925239_-.pdf	Online figure
ENSMUSG00000038039.12	Gcc2	1.77036e-05	0.000517607	1	0	1	chr10	+	SE	exonStart_0base 58272332 exonEnd 58272405 upstreamES 58269261 upstreamEE 58271706 downstreamES 58274735 downstreamEE 58274836	https://betsholtzlab.org/Publications/MouseKidenyOB/splicing/GE_Lean_6w_vs_GE_Obese_6w/SE/380_Gcc2_chr10_58269262_58271706_+@chr10_58272333_58272405_+@chr10_58274736_58274836_+.pdf	Online figure
ENSMUSG00000002227.14	Mov10	0.000766445	0.00738261	0.25	1	-0.75	chr3	-	SE	exonStart_0base 104799697 exonEnd 104799795 upstreamES 104799391 upstreamEE 104799608 downstreamES 104799945 downstreamEE 104800049	https://betsholtzlab.org/Publications/MouseKidenyOB/splicing/GE_Lean_6w_vs_GE_Obese_6w/SE/381_Mov10_chr3_104799946_104800049_-@chr3_104799698_104799795_-@chr3_104799392_104799608_-.pdf	Online figure
ENSMUSG00000004032.9	Gstm5	0.00534803	0.0307751	1	0.254	0.746	chr3	+	SE	exonStart_0base 107896297 exonEnd 107896536 upstreamES 107895845 upstreamEE 107895998 downstreamES 107896625 downstreamEE 107896690	https://betsholtzlab.org/Publications/MouseKidenyOB/splicing/GE_Lean_6w_vs_GE_Obese_6w/SE/382_Gstm5_chr3_107895846_107895998_+@chr3_107896298_107896536_+@chr3_107896626_107896690_+.pdf	Online figure
ENSMUSG00000048796.7	Cyb561d1	0.000602342	0.00621561	1	0.22	0.78	chr3	-	SE	exonStart_0base 108200124 exonEnd 108200162 upstreamES 108195686 upstreamEE 108199715 downstreamES 108200626 downstreamEE 108200834	https://betsholtzlab.org/Publications/MouseKidenyOB/splicing/GE_Lean_6w_vs_GE_Obese_6w/SE/383_Cyb561d1_chr3_108200627_108200834_-@chr3_108200125_108200162_-@chr3_108195687_108199715_-.pdf	Online figure
ENSMUSG00000048796.7	Cyb561d1	2.41281e-06	0.00016535	1	0	1	chr3	-	SE	exonStart_0base 108200124 exonEnd 108200270 upstreamES 108195770 upstreamEE 108199715 downstreamES 108200626 downstreamEE 108201212	https://betsholtzlab.org/Publications/MouseKidenyOB/splicing/GE_Lean_6w_vs_GE_Obese_6w/SE/384_Cyb561d1_chr3_108200627_108201212_-@chr3_108200125_108200270_-@chr3_108195771_108199715_-.pdf	Online figure
ENSMUSG00000020309.6	Chac2	0.00011131	0.00174155	1	0.187	0.813	chr11	-	SE	exonStart_0base 30979564 exonEnd 30979600 upstreamES 30976706 upstreamEE 30977746 downstreamES 30986111 downstreamEE 30986350	https://betsholtzlab.org/Publications/MouseKidenyOB/splicing/GE_Lean_6w_vs_GE_Obese_6w/SE/385_Chac2_chr11_30986112_30986350_-@chr11_30979565_30979600_-@chr11_30976707_30977746_-.pdf	Online figure
ENSMUSG00000029191.15	Rfc1	4.20259e-05	0.000873982	0.296	1	-0.704	chr5	-	SE	exonStart_0base 65272377 exonEnd 65272532 upstreamES 65272140 upstreamEE 65272258 downstreamES 65273950 downstreamEE 65274049	https://betsholtzlab.org/Publications/MouseKidenyOB/splicing/GE_Lean_6w_vs_GE_Obese_6w/SE/386_Rfc1_chr5_65273951_65274049_-@chr5_65272378_65272532_-@chr5_65272141_65272258_-.pdf	Online figure
ENSMUSG00000028030.11	Tbck	0.000180235	0.0025573	1	0.166	0.834	chr3	+	SE	exonStart_0base 132707784 exonEnd 132707858 upstreamES 132705512 upstreamEE 132705627 downstreamES 132715588 downstreamEE 132715730	https://betsholtzlab.org/Publications/MouseKidenyOB/splicing/GE_Lean_6w_vs_GE_Obese_6w/SE/387_Tbck_chr3_132705513_132705627_+@chr3_132707785_132707858_+@chr3_132715589_132715730_+.pdf	Online figure
ENSMUSG00000031976.13	Urb2	0.00234675	0.0168135	0.37	1	-0.63	chr8	+	SE	exonStart_0base 124038160 exonEnd 124038403 upstreamES 124036635 upstreamEE 124036746 downstreamES 124041165 downstreamEE 124041253	https://betsholtzlab.org/Publications/MouseKidenyOB/splicing/GE_Lean_6w_vs_GE_Obese_6w/SE/388_Urb2_chr8_124036636_124036746_+@chr8_124038161_124038403_+@chr8_124041166_124041253_+.pdf	Online figure
ENSMUSG00000026987.15	Baz2b	0.00412357	0.0257512	0.099	0.507	-0.408	chr2	-	SE	exonStart_0base 59959820 exonEnd 59960105 upstreamES 59958431 upstreamEE 59958492 downstreamES 59962020 downstreamEE 59962630	https://betsholtzlab.org/Publications/MouseKidenyOB/splicing/GE_Lean_6w_vs_GE_Obese_6w/SE/389_Baz2b_chr2_59962021_59962630_-@chr2_59959821_59960105_-@chr2_59958432_59958492_-.pdf	Online figure
ENSMUSG00000026116.10	Tmem131	2.96278e-05	0.000707858	1	0	1	chr1	-	SE	exonStart_0base 36824404 exonEnd 36824588 upstreamES 36823066 upstreamEE 36823153 downstreamES 36824715 downstreamEE 36824781	https://betsholtzlab.org/Publications/MouseKidenyOB/splicing/GE_Lean_6w_vs_GE_Obese_6w/SE/390_Tmem131_chr1_36824716_36824781_-@chr1_36824405_36824588_-@chr1_36823067_36823153_-.pdf	Online figure
ENSMUSG00000020453.16	Patz1	0.00188313	0.0141946	0	0.51	-0.51	chr11	+	SE	exonStart_0base 3294455 exonEnd 3294547 upstreamES 3293279 upstreamEE 3293343 downstreamES 3299033 downstreamEE 3299205	https://betsholtzlab.org/Publications/MouseKidenyOB/splicing/GE_Lean_6w_vs_GE_Obese_6w/SE/391_Patz1_chr11_3293280_3293343_+@chr11_3294456_3294547_+@chr11_3299034_3299205_+.pdf	Online figure
ENSMUSG00000020453.16	Patz1	0.000252323	0.00323163	0	0.611	-0.611	chr11	+	SE	exonStart_0base 3306222 exonEnd 3306360 upstreamES 3299033 upstreamEE 3299205 downstreamES 3307647 downstreamEE 3309083	https://betsholtzlab.org/Publications/MouseKidenyOB/splicing/GE_Lean_6w_vs_GE_Obese_6w/SE/392_Patz1_chr11_3299034_3299205_+@chr11_3306223_3306360_+@chr11_3307648_3309083_+.pdf	Online figure
ENSMUSG00000025437.14	Usp33	0.000526424	0.00568491	0.405	1	-0.595	chr3	+	SE	exonStart_0base 152374890 exonEnd 152374985 upstreamES 152374619 upstreamEE 152374789 downstreamES 152376241 downstreamEE 152376275	https://betsholtzlab.org/Publications/MouseKidenyOB/splicing/GE_Lean_6w_vs_GE_Obese_6w/SE/393_Usp33_chr3_152374620_152374789_+@chr3_152374891_152374985_+@chr3_152376242_152376275_+.pdf	Online figure
ENSMUSG00000025437.14	Usp33	0.000930385	0.008442	0.45	1	-0.55	chr3	+	SE	exonStart_0base 152374914 exonEnd 152374985 upstreamES 152374619 upstreamEE 152374789 downstreamES 152376241 downstreamEE 152376275	https://betsholtzlab.org/Publications/MouseKidenyOB/splicing/GE_Lean_6w_vs_GE_Obese_6w/SE/394_Usp33_chr3_152374620_152374789_+@chr3_152374915_152374985_+@chr3_152376242_152376275_+.pdf	Online figure
ENSMUSG00000050323.13	Ndufaf6	0.0056833	0.0320669	0.244	1	-0.756	chr4	-	SE	exonStart_0base 11062049 exonEnd 11062152 upstreamES 11059011 upstreamEE 11059113 downstreamES 11070199 downstreamEE 11070322	https://betsholtzlab.org/Publications/MouseKidenyOB/splicing/GE_Lean_6w_vs_GE_Obese_6w/SE/395_Ndufaf6_chr4_11070200_11070322_-@chr4_11062050_11062152_-@chr4_11059012_11059113_-.pdf	Online figure
ENSMUSG00000034903.17	Cobll1	2.77517e-05	0.000695475	0	1	-1	chr2	-	SE	exonStart_0base 65132495 exonEnd 65132534 upstreamES 65126207 upstreamEE 65126305 downstreamES 65133578 downstreamEE 65133807	https://betsholtzlab.org/Publications/MouseKidenyOB/splicing/GE_Lean_6w_vs_GE_Obese_6w/SE/396_Cobll1_chr2_65133579_65133807_-@chr2_65132496_65132534_-@chr2_65126208_65126305_-.pdf	Online figure
ENSMUSG00000038644.13	Pold1	0.006786	0.0362734	0.521	1	-0.479	chr7	-	SE	exonStart_0base 44535016 exonEnd 44535192 upstreamES 44534563 upstreamEE 44534716 downstreamES 44535698 downstreamEE 44535836	https://betsholtzlab.org/Publications/MouseKidenyOB/splicing/GE_Lean_6w_vs_GE_Obese_6w/SE/397_Pold1_chr7_44535699_44535836_-@chr7_44535017_44535192_-@chr7_44534564_44534716_-.pdf	Online figure
ENSMUSG00000002968.7	Med25	6.91101e-05	0.00121975	1	0.493	0.507	chr7	-	SE	exonStart_0base 44880566 exonEnd 44880638 upstreamES 44880251 upstreamEE 44880470 downstreamES 44880922 downstreamEE 44881111	https://betsholtzlab.org/Publications/MouseKidenyOB/splicing/GE_Lean_6w_vs_GE_Obese_6w/SE/398_Med25_chr7_44880923_44881111_-@chr7_44880567_44880638_-@chr7_44880252_44880470_-.pdf	Online figure
ENSMUSG00000089989.8	Flt3l	6.45141e-08	1.77844e-05	1	0	1	chr7	-	SE	exonStart_0base 45131666 exonEnd 45131740 upstreamES 45131374 upstreamEE 45131566 downstreamES 45132068 downstreamEE 45132137	https://betsholtzlab.org/Publications/MouseKidenyOB/splicing/GE_Lean_6w_vs_GE_Obese_6w/SE/399_Flt3l_chr7_45132069_45132137_-@chr7_45131667_45131740_-@chr7_45131375_45131566_-.pdf	Online figure
ENSMUSG00000059070.13	Rpl18	9.42146e-05	0.0015502	1	0.039	0.961	chr7	+	SE	exonStart_0base 45720293 exonEnd 45720487 upstreamES 45719528 upstreamEE 45720018 downstreamES 45720713 downstreamEE 45720785	https://betsholtzlab.org/Publications/MouseKidenyOB/splicing/GE_Lean_6w_vs_GE_Obese_6w/SE/400_Rpl18_chr7_45719529_45720018_+@chr7_45720294_45720487_+@chr7_45720714_45720785_+.pdf	Online figure
ENSMUSG00000059070.13	Rpl18	2.91652e-05	0.000703488	1	0	1	chr7	+	SE	exonStart_0base 45720437 exonEnd 45720487 upstreamES 45719919 upstreamEE 45720018 downstreamES 45720713 downstreamEE 45720830	https://betsholtzlab.org/Publications/MouseKidenyOB/splicing/GE_Lean_6w_vs_GE_Obese_6w/SE/401_Rpl18_chr7_45719920_45720018_+@chr7_45720438_45720487_+@chr7_45720714_45720830_+.pdf	Online figure
ENSMUSG00000030451.14	Herc2	1.16162e-05	0.000410039	1	0	1	chr7	+	SE	exonStart_0base 56202100 exonEnd 56202208 upstreamES 56197055 upstreamEE 56197209 downstreamES 56203775 downstreamEE 56203907	https://betsholtzlab.org/Publications/MouseKidenyOB/splicing/GE_Lean_6w_vs_GE_Obese_6w/SE/402_Herc2_chr7_56197056_56197209_+@chr7_56202101_56202208_+@chr7_56203776_56203907_+.pdf	Online figure
ENSMUSG00000037486.16	Asxl2	0.000906618	0.00829133	0.545	1	-0.455	chr12	+	SE	exonStart_0base 3476025 exonEnd 3476169 upstreamES 3474489 upstreamEE 3474613 downstreamES 3484444 downstreamEE 3484608	https://betsholtzlab.org/Publications/MouseKidenyOB/splicing/GE_Lean_6w_vs_GE_Obese_6w/SE/403_Asxl2_chr12_3474490_3474613_+@chr12_3476026_3476169_+@chr12_3484445_3484608_+.pdf	Online figure
ENSMUSG00000037447.15	Arid5a	0.00734567	0.0384138	0.289	0.715	-0.426	chr1	+	SE	exonStart_0base 36317203 exonEnd 36317662 upstreamES 36316211 upstreamEE 36316327 downstreamES 36318083 downstreamEE 36318181	https://betsholtzlab.org/Publications/MouseKidenyOB/splicing/GE_Lean_6w_vs_GE_Obese_6w/SE/404_Arid5a_chr1_36316212_36316327_+@chr1_36317204_36317662_+@chr1_36318084_36318181_+.pdf	Online figure
ENSMUSG00000037447.15	Arid5a	0.00103594	0.00907268	0.325	0.841	-0.516	chr1	+	SE	exonStart_0base 36317609 exonEnd 36317662 upstreamES 36316208 upstreamEE 36316327 downstreamES 36318083 downstreamEE 36318132	https://betsholtzlab.org/Publications/MouseKidenyOB/splicing/GE_Lean_6w_vs_GE_Obese_6w/SE/405_Arid5a_chr1_36316209_36316327_+@chr1_36317610_36317662_+@chr1_36318084_36318132_+.pdf	Online figure
ENSMUSG00000022307.14	Oxr1	1.64672e-05	0.000507204	0	1	-1	chr15	+	SE	exonStart_0base 41848669 exonEnd 41848750 upstreamES 41825889 upstreamEE 41826052 downstreamES 41850458 downstreamEE 41850584	https://betsholtzlab.org/Publications/MouseKidenyOB/splicing/GE_Lean_6w_vs_GE_Obese_6w/SE/406_Oxr1_chr15_41825890_41826052_+@chr15_41848670_41848750_+@chr15_41850459_41850584_+.pdf	Online figure
ENSMUSG00000037236.13	Matr3	9.43163e-07	8.80641e-05	0.475	0.93	-0.455	chr18	+	SE	exonStart_0base 35571842 exonEnd 35572935 upstreamES 35562157 upstreamEE 35562292 downstreamES 35577557 downstreamEE 35577619	https://betsholtzlab.org/Publications/MouseKidenyOB/splicing/GE_Lean_6w_vs_GE_Obese_6w/SE/407_Matr3_chr18_35562158_35562292_+@chr18_35571843_35572935_+@chr18_35577558_35577619_+.pdf	Online figure
ENSMUSG00000030509.15	Asb7	0.000355184	0.00421321	1	0.151	0.849	chr7	-	SE	exonStart_0base 66678156 exonEnd 66678245 upstreamES 66659649 upstreamEE 66660255 downstreamES 66679079 downstreamEE 66679341	https://betsholtzlab.org/Publications/MouseKidenyOB/splicing/GE_Lean_6w_vs_GE_Obese_6w/SE/408_Asb7_chr7_66679080_66679341_-@chr7_66678157_66678245_-@chr7_66659650_66660255_-.pdf	Online figure
ENSMUSG00000030555.14	Ttc23	0.00287803	0.0195093	1	0.579	0.421	chr7	+	SE	exonStart_0base 67651922 exonEnd 67651971 upstreamES 67647459 upstreamEE 67647845 downstreamES 67662326 downstreamEE 67662526	https://betsholtzlab.org/Publications/MouseKidenyOB/splicing/GE_Lean_6w_vs_GE_Obese_6w/SE/409_Ttc23_chr7_67647460_67647845_+@chr7_67651923_67651971_+@chr7_67662327_67662526_+.pdf	Online figure
ENSMUSG00000097277.6	2900076A07Rik	4.22469e-05	0.000873982	1	0	1	chr7	+	SE	exonStart_0base 81529156 exonEnd 81529258 upstreamES 81528791 upstreamEE 81528940 downstreamES 81529346 downstreamEE 81529527	https://betsholtzlab.org/Publications/MouseKidenyOB/splicing/GE_Lean_6w_vs_GE_Obese_6w/SE/410_2900076A07Rik_chr7_81528792_81528940_+@chr7_81529157_81529258_+@chr7_81529347_81529527_+.pdf	Online figure
ENSMUSG00000041328.14	Pcf11	0.00179696	0.0137419	0.566	1	-0.434	chr7	-	SE	exonStart_0base 92665739 exonEnd 92665865 upstreamES 92663966 upstreamEE 92664155 downstreamES 92669428 downstreamEE 92669933	https://betsholtzlab.org/Publications/MouseKidenyOB/splicing/GE_Lean_6w_vs_GE_Obese_6w/SE/411_Pcf11_chr7_92669429_92669933_-@chr7_92665740_92665865_-@chr7_92663967_92664155_-.pdf	Online figure
ENSMUSG00000035401.8	2210018M11Rik	0.00205986	0.0151578	1	0.587	0.413	chr7	-	SE	exonStart_0base 98593330 exonEnd 98593810 upstreamES 98590614 upstreamEE 98590884 downstreamES 98594751 downstreamEE 98595312	https://betsholtzlab.org/Publications/MouseKidenyOB/splicing/GE_Lean_6w_vs_GE_Obese_6w/SE/412_2210018M11Rik_chr7_98594752_98595312_-@chr7_98593331_98593810_-@chr7_98590615_98590884_-.pdf	Online figure
ENSMUSG00000030753.14	Prkrir	3.20006e-05	0.000707858	0.671	0	0.671	chr7	+	SE	exonStart_0base 98707936 exonEnd 98708031 upstreamES 98706996 upstreamEE 98707117 downstreamES 98710125 downstreamEE 98710233	https://betsholtzlab.org/Publications/MouseKidenyOB/splicing/GE_Lean_6w_vs_GE_Obese_6w/SE/413_Prkrir_chr7_98706997_98707117_+@chr7_98707937_98708031_+@chr7_98710126_98710233_+.pdf	Online figure
ENSMUSG00000032860.4	P2ry2	0.000855146	0.00797973	0.45	1	-0.55	chr7	-	SE	exonStart_0base 101003563 exonEnd 101003754 upstreamES 100996571 upstreamEE 100999100 downstreamES 101011711 downstreamEE 101011991	https://betsholtzlab.org/Publications/MouseKidenyOB/splicing/GE_Lean_6w_vs_GE_Obese_6w/SE/414_P2ry2_chr7_101011712_101011991_-@chr7_101003564_101003754_-@chr7_100996572_100999100_-.pdf	Online figure
ENSMUSG00000047767.15	Atg16l2	1.84329e-05	0.000525654	0.754	0.127	0.627	chr7	-	SE	exonStart_0base 101294858 exonEnd 101294921 upstreamES 101293875 upstreamEE 101293984 downstreamES 101296120 downstreamEE 101296234	https://betsholtzlab.org/Publications/MouseKidenyOB/splicing/GE_Lean_6w_vs_GE_Obese_6w/SE/415_Atg16l2_chr7_101296121_101296234_-@chr7_101294859_101294921_-@chr7_101293876_101293984_-.pdf	Online figure
ENSMUSG00000064307.11	Lrrc51	2.90016e-05	0.00070247	0	1	-1	chr7	-	SE	exonStart_0base 101921503 exonEnd 101921566 upstreamES 101920636 upstreamEE 101920774 downstreamES 101933763 downstreamEE 101933802	https://betsholtzlab.org/Publications/MouseKidenyOB/splicing/GE_Lean_6w_vs_GE_Obese_6w/SE/416_Lrrc51_chr7_101933764_101933802_-@chr7_101921504_101921566_-@chr7_101920637_101920774_-.pdf	Online figure
ENSMUSG00000099481.5	Xndc1	0.00080015	0.00758112	1	0.254	0.746	chr7	+	SE	exonStart_0base 102069896 exonEnd 102069991 upstreamES 102065519 upstreamEE 102065804 downstreamES 102071186 downstreamEE 102071361	https://betsholtzlab.org/Publications/MouseKidenyOB/splicing/GE_Lean_6w_vs_GE_Obese_6w/SE/417_Xndc1_chr7_102065520_102065804_+@chr7_102069897_102069991_+@chr7_102071187_102071361_+.pdf	Online figure
ENSMUSG00000070425.11	Xntrpc	8.75908e-05	0.0014655	1	0.158	0.842	chr7	+	SE	exonStart_0base 102071186 exonEnd 102071361 upstreamES 102065777 upstreamEE 102065942 downstreamES 102073174 downstreamEE 102073316	https://betsholtzlab.org/Publications/MouseKidenyOB/splicing/GE_Lean_6w_vs_GE_Obese_6w/SE/418_Xntrpc_chr7_102065778_102065942_+@chr7_102071187_102071361_+@chr7_102073175_102073316_+.pdf	Online figure
ENSMUSG00000027680.14	Fxr1	0.000116178	0.00179827	0.07	1	-0.93	chr3	+	SE	exonStart_0base 34064973 exonEnd 34065054 upstreamES 34064118 upstreamEE 34064319 downstreamES 34068160 downstreamEE 34068252	https://betsholtzlab.org/Publications/MouseKidenyOB/splicing/GE_Lean_6w_vs_GE_Obese_6w/SE/419_Fxr1_chr3_34064119_34064319_+@chr3_34064974_34065054_+@chr3_34068161_34068252_+.pdf	Online figure
ENSMUSG00000038187.13	Btbd10	0.000806459	0.00759559	0.525	1	-0.475	chr7	-	SE	exonStart_0base 113351780 exonEnd 113351938 upstreamES 113335321 upstreamEE 113335518 downstreamES 113364904 downstreamEE 113364969	https://betsholtzlab.org/Publications/MouseKidenyOB/splicing/GE_Lean_6w_vs_GE_Obese_6w/SE/420_Btbd10_chr7_113364905_113364969_-@chr7_113351781_113351938_-@chr7_113335322_113335518_-.pdf	Online figure
ENSMUSG00000030659.13	Nucb2	0.000217488	0.00289434	0.42	1	-0.58	chr7	+	SE	exonStart_0base 116509454 exonEnd 116509625 upstreamES 116504368 upstreamEE 116504484 downstreamES 116521836 downstreamEE 116521980	https://betsholtzlab.org/Publications/MouseKidenyOB/splicing/GE_Lean_6w_vs_GE_Obese_6w/SE/421_Nucb2_chr7_116504369_116504484_+@chr7_116509455_116509625_+@chr7_116521837_116521980_+.pdf	Online figure
ENSMUSG00000020514.7	Mrpl22	0.00883409	0.0439529	1	0.292	0.708	chr11	+	SE	exonStart_0base 58177216 exonEnd 58177286 upstreamES 58176131 upstreamEE 58176209 downstreamES 58179277 downstreamEE 58179565	https://betsholtzlab.org/Publications/MouseKidenyOB/splicing/GE_Lean_6w_vs_GE_Obese_6w/SE/422_Mrpl22_chr11_58176132_58176209_+@chr11_58177217_58177286_+@chr11_58179278_58179565_+.pdf	Online figure
ENSMUSG00000030867.6	Plk1	1.99397e-05	0.000560344	1	0	1	chr7	+	SE	exonStart_0base 122169080 exonEnd 122169263 upstreamES 122168828 upstreamEE 122168983 downstreamES 122169386 downstreamEE 122169875	https://betsholtzlab.org/Publications/MouseKidenyOB/splicing/GE_Lean_6w_vs_GE_Obese_6w/SE/423_Plk1_chr7_122168829_122168983_+@chr7_122169081_122169263_+@chr7_122169387_122169875_+.pdf	Online figure
ENSMUSG00000030727.11	Rabep2	0.000231798	0.00303426	0.384	1	-0.616	chr7	+	SE	exonStart_0base 126444522 exonEnd 126444578 upstreamES 126444417 upstreamEE 126444429 downstreamES 126444819 downstreamEE 126444936	https://betsholtzlab.org/Publications/MouseKidenyOB/splicing/GE_Lean_6w_vs_GE_Obese_6w/SE/424_Rabep2_chr7_126444418_126444429_+@chr7_126444523_126444578_+@chr7_126444820_126444936_+.pdf	Online figure
ENSMUSG00000030850.14	Ate1	0.00631951	0.0344994	0.635	0.194	0.441	chr7	-	SE	exonStart_0base 130504693 exonEnd 130504822 upstreamES 130503721 upstreamEE 130503850 downstreamES 130507481 downstreamEE 130507699	https://betsholtzlab.org/Publications/MouseKidenyOB/splicing/GE_Lean_6w_vs_GE_Obese_6w/SE/425_Ate1_chr7_130507482_130507699_-@chr7_130504694_130504822_-@chr7_130503722_130503850_-.pdf	Online figure
ENSMUSG00000030960.15	Mettl10	1.08843e-06	9.13179e-05	0	1	-1	chr7	-	SE	exonStart_0base 132831359 exonEnd 132831576 upstreamES 132827456 upstreamEE 132827882 downstreamES 132837099 downstreamEE 132837207	https://betsholtzlab.org/Publications/MouseKidenyOB/splicing/GE_Lean_6w_vs_GE_Obese_6w/SE/426_Mettl10_chr7_132837100_132837207_-@chr7_132831360_132831576_-@chr7_132827457_132827882_-.pdf	Online figure
ENSMUSG00000061589.13	Dot1l	0.000599478	0.00621561	1	0.177	0.823	chr10	+	SE	exonStart_0base 80790319 exonEnd 80790384 upstreamES 80789313 upstreamEE 80789519 downstreamES 80793506 downstreamEE 80794387	https://betsholtzlab.org/Publications/MouseKidenyOB/splicing/GE_Lean_6w_vs_GE_Obese_6w/SE/427_Dot1l_chr10_80789314_80789519_+@chr10_80790320_80790384_+@chr10_80793507_80794387_+.pdf	Online figure
ENSMUSG00000041769.12	Ppp2r2d	1.81705e-05	0.000523327	0.668	0	0.668	chr7	+	SE	exonStart_0base 138860836 exonEnd 138860909 upstreamES 138846619 upstreamEE 138846704 downstreamES 138868409 downstreamEE 138868507	https://betsholtzlab.org/Publications/MouseKidenyOB/splicing/GE_Lean_6w_vs_GE_Obese_6w/SE/428_Ppp2r2d_chr7_138846620_138846704_+@chr7_138860837_138860909_+@chr7_138868410_138868507_+.pdf	Online figure
ENSMUSG00000041769.12	Ppp2r2d	5.69857e-05	0.00106416	0.506	1	-0.494	chr7	+	SE	exonStart_0base 138869689 exonEnd 138869855 upstreamES 138868409 upstreamEE 138868507 downstreamES 138870389 downstreamEE 138870502	https://betsholtzlab.org/Publications/MouseKidenyOB/splicing/GE_Lean_6w_vs_GE_Obese_6w/SE/429_Ppp2r2d_chr7_138868410_138868507_+@chr7_138869690_138869855_+@chr7_138870390_138870502_+.pdf	Online figure
ENSMUSG00000025505.15	Tmem80	7.56478e-05	0.00128424	0.49	1	-0.51	chr7	+	SE	exonStart_0base 141333637 exonEnd 141333731 upstreamES 141332909 upstreamEE 141333008 downstreamES 141334010 downstreamEE 141334103	https://betsholtzlab.org/Publications/MouseKidenyOB/splicing/GE_Lean_6w_vs_GE_Obese_6w/SE/430_Tmem80_chr7_141332910_141333008_+@chr7_141333638_141333731_+@chr7_141334011_141334103_+.pdf	Online figure
ENSMUSG00000025505.15	Tmem80	8.35274e-05	0.00140564	0.508	1	-0.492	chr7	+	SE	exonStart_0base 141333647 exonEnd 141333731 upstreamES 141332909 upstreamEE 141333008 downstreamES 141334010 downstreamEE 141334103	https://betsholtzlab.org/Publications/MouseKidenyOB/splicing/GE_Lean_6w_vs_GE_Obese_6w/SE/431_Tmem80_chr7_141332910_141333008_+@chr7_141333648_141333731_+@chr7_141334011_141334103_+.pdf	Online figure
ENSMUSG00000006675.9	P4htm	7.53467e-07	7.35401e-05	0	1	-1	chr9	-	SE	exonStart_0base 108582081 exonEnd 108582179 upstreamES 108581841 upstreamEE 108582004 downstreamES 108582846 downstreamEE 108582936	https://betsholtzlab.org/Publications/MouseKidenyOB/splicing/GE_Lean_6w_vs_GE_Obese_6w/SE/432_P4htm_chr9_108582847_108582936_-@chr9_108582082_108582179_-@chr9_108581842_108582004_-.pdf	Online figure
ENSMUSG00000010755.15	Cars	0.00478777	0.0286622	0.884	0.47	0.414	chr7	-	SE	exonStart_0base 143587104 exonEnd 143587193 upstreamES 143586414 upstreamEE 143586511 downstreamES 143588491 downstreamEE 143588583	https://betsholtzlab.org/Publications/MouseKidenyOB/splicing/GE_Lean_6w_vs_GE_Obese_6w/SE/433_Cars_chr7_143588492_143588583_-@chr7_143587105_143587193_-@chr7_143586415_143586511_-.pdf	Online figure
ENSMUSG00000023235.12	Ccl25	0.00330357	0.0217817	1	0.222	0.778	chr8	+	SE	exonStart_0base 4349771 exonEnd 4349894 upstreamES 4327756 upstreamEE 4327850 downstreamES 4353882 downstreamEE 4354000	https://betsholtzlab.org/Publications/MouseKidenyOB/splicing/GE_Lean_6w_vs_GE_Obese_6w/SE/434_Ccl25_chr8_4327757_4327850_+@chr8_4349772_4349894_+@chr8_4353883_4354000_+.pdf	Online figure
ENSMUSG00000040396.11	Abhd13	0.000139149	0.00207612	1	0.338	0.662	chr8	+	SE	exonStart_0base 9982863 exonEnd 9982970 upstreamES 9977706 upstreamEE 9978019 downstreamES 9987384 downstreamEE 9992155	https://betsholtzlab.org/Publications/MouseKidenyOB/splicing/GE_Lean_6w_vs_GE_Obese_6w/SE/435_Abhd13_chr8_9977707_9978019_+@chr8_9982864_9982970_+@chr8_9987385_9992155_+.pdf	Online figure
ENSMUSG00000037286.14	Stag1	0.000913552	0.00834157	0.5	0	0.5	chr9	+	SE	exonStart_0base 100663249 exonEnd 100663298 upstreamES 100643612 upstreamEE 100643796 downstreamES 100705152 downstreamEE 100705254	https://betsholtzlab.org/Publications/MouseKidenyOB/splicing/GE_Lean_6w_vs_GE_Obese_6w/SE/436_Stag1_chr9_100643613_100643796_+@chr9_100663250_100663298_+@chr9_100705153_100705254_+.pdf	Online figure
ENSMUSG00000030086.15	Chchd6	0.00212164	0.0154882	0.575	1	-0.425	chr6	-	SE	exonStart_0base 89467389 exonEnd 89467473 upstreamES 89418346 upstreamEE 89419818 downstreamES 89567586 downstreamEE 89567731	https://betsholtzlab.org/Publications/MouseKidenyOB/splicing/GE_Lean_6w_vs_GE_Obese_6w/SE/437_Chchd6_chr6_89567587_89567731_-@chr6_89467390_89467473_-@chr6_89418347_89419818_-.pdf	Online figure
ENSMUSG00000027940.17	Tpm3	0.00754752	0.0389764	1	0.274	0.726	chr3	+	SE	exonStart_0base 90088400 exonEnd 90088481 upstreamES 90087673 upstreamEE 90087744 downstreamES 90089796 downstreamEE 90089807	https://betsholtzlab.org/Publications/MouseKidenyOB/splicing/GE_Lean_6w_vs_GE_Obese_6w/SE/438_Tpm3_chr3_90087674_90087744_+@chr3_90088401_90088481_+@chr3_90089797_90089807_+.pdf	Online figure
ENSMUSG00000039842.14	Mcph1	5.43733e-05	0.00102197	0	1	-1	chr8	+	SE	exonStart_0base 18625559 exonEnd 18625674 upstreamES 18622606 upstreamEE 18622694 downstreamES 18627117 downstreamEE 18627240	https://betsholtzlab.org/Publications/MouseKidenyOB/splicing/GE_Lean_6w_vs_GE_Obese_6w/SE/439_Mcph1_chr8_18622607_18622694_+@chr8_18625560_18625674_+@chr8_18627118_18627240_+.pdf	Online figure
ENSMUSG00000039585.14	Myo9a	0.00353999	0.0230326	0.581	0	0.581	chr9	+	SE	exonStart_0base 59790035 exonEnd 59790092 upstreamES 59788414 upstreamEE 59788514 downstreamES 59801913 downstreamEE 59802011	https://betsholtzlab.org/Publications/MouseKidenyOB/splicing/GE_Lean_6w_vs_GE_Obese_6w/SE/440_Myo9a_chr9_59788415_59788514_+@chr9_59790036_59790092_+@chr9_59801914_59802011_+.pdf	Online figure
ENSMUSG00000020593.13	Lpin1	5.49649e-06	0.000271959	0	1	-1	chr12	-	SE	exonStart_0base 16571163 exonEnd 16571262 upstreamES 16568389 upstreamEE 16568519 downstreamES 16573659 downstreamEE 16573785	https://betsholtzlab.org/Publications/MouseKidenyOB/splicing/GE_Lean_6w_vs_GE_Obese_6w/SE/441_Lpin1_chr12_16573660_16573785_-@chr12_16571164_16571262_-@chr12_16568390_16568519_-.pdf	Online figure
ENSMUSG00000020593.13	Lpin1	3.08898e-05	0.000707858	0	1	-1	chr12	-	SE	exonStart_0base 16584507 exonEnd 16584651 upstreamES 16580703 upstreamEE 16580904 downstreamES 16589717 downstreamEE 16589770	https://betsholtzlab.org/Publications/MouseKidenyOB/splicing/GE_Lean_6w_vs_GE_Obese_6w/SE/442_Lpin1_chr12_16589718_16589770_-@chr12_16584508_16584651_-@chr12_16580704_16580904_-.pdf	Online figure
ENSMUSG00000021820.15	Camk2g	0.00600682	0.0332923	0.581	0.148	0.433	chr14	-	SE	exonStart_0base 20745791 exonEnd 20745860 upstreamES 20744603 upstreamEE 20744648 downstreamES 20755658 downstreamEE 20755702	https://betsholtzlab.org/Publications/MouseKidenyOB/splicing/GE_Lean_6w_vs_GE_Obese_6w/SE/443_Camk2g_chr14_20755659_20755702_-@chr14_20745792_20745860_-@chr14_20744604_20744648_-.pdf	Online figure
ENSMUSG00000037363.8	Letm2	1.35725e-05	0.00045681	0.088	1	-0.912	chr8	-	SE	exonStart_0base 25585348 exonEnd 25585468 upstreamES 25581672 upstreamEE 25581786 downstreamES 25586606 downstreamEE 25586807	https://betsholtzlab.org/Publications/MouseKidenyOB/splicing/GE_Lean_6w_vs_GE_Obese_6w/SE/444_Letm2_chr8_25586607_25586807_-@chr8_25585349_25585468_-@chr8_25581673_25581786_-.pdf	Online figure
ENSMUSG00000061313.7	Ddhd2	0.00753308	0.0389714	0.295	1	-0.705	chr8	-	SE	exonStart_0base 25741286 exonEnd 25741354 upstreamES 25739462 upstreamEE 25739585 downstreamES 25741600 downstreamEE 25741809	https://betsholtzlab.org/Publications/MouseKidenyOB/splicing/GE_Lean_6w_vs_GE_Obese_6w/SE/445_Ddhd2_chr8_25741601_25741809_-@chr8_25741287_25741354_-@chr8_25739463_25739585_-.pdf	Online figure
ENSMUSG00000031583.11	Wrn	0.00604215	0.0333441	0.25	1	-0.75	chr8	-	SE	exonStart_0base 33268722 exonEnd 33268820 upstreamES 33267784 upstreamEE 33267857 downstreamES 33268895 downstreamEE 33269066	https://betsholtzlab.org/Publications/MouseKidenyOB/splicing/GE_Lean_6w_vs_GE_Obese_6w/SE/446_Wrn_chr8_33268896_33269066_-@chr8_33268723_33268820_-@chr8_33267785_33267857_-.pdf	Online figure
ENSMUSG00000020528.13	Prpsap2	0.00883411	0.0439529	1	0.325	0.675	chr11	-	SE	exonStart_0base 61755409 exonEnd 61755462 upstreamES 61752866 upstreamEE 61752933 downstreamES 61756194 downstreamEE 61756345	https://betsholtzlab.org/Publications/MouseKidenyOB/splicing/GE_Lean_6w_vs_GE_Obese_6w/SE/447_Prpsap2_chr11_61756195_61756345_-@chr11_61755410_61755462_-@chr11_61752867_61752933_-.pdf	Online figure
ENSMUSG00000006276.9	Eps15l1	0.00934281	0.0456803	1	0.574	0.426	chr8	-	SE	exonStart_0base 72358312 exonEnd 72358445 upstreamES 72341000 upstreamEE 72341524 downstreamES 72367903 downstreamEE 72367986	https://betsholtzlab.org/Publications/MouseKidenyOB/splicing/GE_Lean_6w_vs_GE_Obese_6w/SE/448_Eps15l1_chr8_72367904_72367986_-@chr8_72358313_72358445_-@chr8_72341001_72341524_-.pdf	Online figure
ENSMUSG00000004018.8	Fancl	0.00473926	0.0284686	1	0.551	0.449	chr11	+	SE	exonStart_0base 26459685 exonEnd 26459836 upstreamES 26434431 upstreamEE 26434500 downstreamES 26468334 downstreamEE 26468418	https://betsholtzlab.org/Publications/MouseKidenyOB/splicing/GE_Lean_6w_vs_GE_Obese_6w/SE/449_Fancl_chr11_26434432_26434500_+@chr11_26459686_26459836_+@chr11_26468335_26468418_+.pdf	Online figure
ENSMUSG00000037926.14	Ssh2	1.1135e-05	0.000400375	0	1	-1	chr11	+	SE	exonStart_0base 77278145 exonEnd 77278226 upstreamES 77216286 upstreamEE 77216515 downstreamES 77327452 downstreamEE 77327496	https://betsholtzlab.org/Publications/MouseKidenyOB/splicing/GE_Lean_6w_vs_GE_Obese_6w/SE/450_Ssh2_chr11_77216287_77216515_+@chr11_77278146_77278226_+@chr11_77327453_77327496_+.pdf	Online figure
ENSMUSG00000003812.12	Dnase2a	0.000383882	0.00445776	0.324	1	-0.676	chr8	+	SE	exonStart_0base 84909256 exonEnd 84909335 upstreamES 84908984 upstreamEE 84909162 downstreamES 84909771 downstreamEE 84909964	https://betsholtzlab.org/Publications/MouseKidenyOB/splicing/GE_Lean_6w_vs_GE_Obese_6w/SE/451_Dnase2a_chr8_84908985_84909162_+@chr8_84909257_84909335_+@chr8_84909772_84909964_+.pdf	Online figure
ENSMUSG00000003812.12	Dnase2a	0.00101576	0.00896388	0.386	1	-0.614	chr8	+	SE	exonStart_0base 84909525 exonEnd 84909690 upstreamES 84908984 upstreamEE 84909162 downstreamES 84909771 downstreamEE 84909925	https://betsholtzlab.org/Publications/MouseKidenyOB/splicing/GE_Lean_6w_vs_GE_Obese_6w/SE/452_Dnase2a_chr8_84908985_84909162_+@chr8_84909526_84909690_+@chr8_84909772_84909925_+.pdf	Online figure
ENSMUSG00000003812.12	Dnase2a	6.21414e-05	0.00112557	1	0.103	0.897	chr8	+	SE	exonStart_0base 84909525 exonEnd 84909690 upstreamES 84909256 upstreamEE 84909335 downstreamES 84909771 downstreamEE 84909925	https://betsholtzlab.org/Publications/MouseKidenyOB/splicing/GE_Lean_6w_vs_GE_Obese_6w/SE/453_Dnase2a_chr8_84909257_84909335_+@chr8_84909526_84909690_+@chr8_84909772_84909925_+.pdf	Online figure
ENSMUSG00000035601.8	Trmt10b	1.01499e-08	5.34159e-06	0	0.581	-0.581	chr4	+	SE	exonStart_0base 45299746 exonEnd 45299897 upstreamES 45297154 upstreamEE 45297195 downstreamES 45300416 downstreamEE 45300627	https://betsholtzlab.org/Publications/MouseKidenyOB/splicing/GE_Lean_6w_vs_GE_Obese_6w/SE/454_Trmt10b_chr4_45297155_45297195_+@chr4_45299747_45299897_+@chr4_45300417_45300627_+.pdf	Online figure
ENSMUSG00000035601.8	Trmt10b	0.000117868	0.00181473	0.416	1	-0.584	chr4	+	SE	exonStart_0base 45307891 exonEnd 45307970 upstreamES 45305743 upstreamEE 45305896 downstreamES 45308496 downstreamEE 45308564	https://betsholtzlab.org/Publications/MouseKidenyOB/splicing/GE_Lean_6w_vs_GE_Obese_6w/SE/455_Trmt10b_chr4_45305744_45305896_+@chr4_45307892_45307970_+@chr4_45308497_45308564_+.pdf	Online figure
ENSMUSG00000029657.14	Hsph1	9.89166e-05	0.00159952	0.52	1	-0.48	chr5	-	SE	exonStart_0base 149623464 exonEnd 149623596 upstreamES 149620545 upstreamEE 149620683 downstreamES 149624968 downstreamEE 149625177	https://betsholtzlab.org/Publications/MouseKidenyOB/splicing/GE_Lean_6w_vs_GE_Obese_6w/SE/456_Hsph1_chr5_149624969_149625177_-@chr5_149623465_149623596_-@chr5_149620546_149620683_-.pdf	Online figure
ENSMUSG00000071644.9	Eef1g	0.00923909	0.045288	1	0.316	0.684	chr19	+	SE	exonStart_0base 8970584 exonEnd 8970747 upstreamES 8969843 upstreamEE 8969987 downstreamES 8972506 downstreamEE 8972636	https://betsholtzlab.org/Publications/MouseKidenyOB/splicing/GE_Lean_6w_vs_GE_Obese_6w/SE/457_Eef1g_chr19_8969844_8969987_+@chr19_8970585_8970747_+@chr19_8972507_8972636_+.pdf	Online figure
ENSMUSG00000000738.16	Spg7	0.00739739	0.0385103	0.53	1	-0.47	chr8	+	SE	exonStart_0base 123077817 exonEnd 123077920 upstreamES 123076850 upstreamEE 123076990 downstreamES 123079413 downstreamEE 123079539	https://betsholtzlab.org/Publications/MouseKidenyOB/splicing/GE_Lean_6w_vs_GE_Obese_6w/SE/458_Spg7_chr8_123076851_123076990_+@chr8_123077818_123077920_+@chr8_123079414_123079539_+.pdf	Online figure
ENSMUSG00000000738.16	Spg7	0.00172225	0.0133469	0	0.501	-0.501	chr8	+	SE	exonStart_0base 123083821 exonEnd 123083943 upstreamES 123080408 upstreamEE 123080810 downstreamES 123087327 downstreamEE 123087452	https://betsholtzlab.org/Publications/MouseKidenyOB/splicing/GE_Lean_6w_vs_GE_Obese_6w/SE/459_Spg7_chr8_123080409_123080810_+@chr8_123083822_123083943_+@chr8_123087328_123087452_+.pdf	Online figure
ENSMUSG00000029761.15	Cald1	0.00643194	0.0349292	0.269	1	-0.731	chr6	+	SE	exonStart_0base 34747885 exonEnd 34747969 upstreamES 34745980 upstreamEE 34746639 downstreamES 34753442 downstreamEE 34753588	https://betsholtzlab.org/Publications/MouseKidenyOB/splicing/GE_Lean_6w_vs_GE_Obese_6w/SE/460_Cald1_chr6_34745981_34746639_+@chr6_34747886_34747969_+@chr6_34753443_34753588_+.pdf	Online figure
ENSMUSG00000029761.15	Cald1	0.00696867	0.0370002	0.278	1	-0.722	chr6	+	SE	exonStart_0base 34747891 exonEnd 34747969 upstreamES 34745618 upstreamEE 34746639 downstreamES 34753442 downstreamEE 34753588	https://betsholtzlab.org/Publications/MouseKidenyOB/splicing/GE_Lean_6w_vs_GE_Obese_6w/SE/461_Cald1_chr6_34745619_34746639_+@chr6_34747892_34747969_+@chr6_34753443_34753588_+.pdf	Online figure
ENSMUSG00000079084.8	Ccdc82	2.6005e-05	0.000672068	0.149	0.711	-0.562	chr9	+	SE	exonStart_0base 13249258 exonEnd 13249342 upstreamES 13246981 upstreamEE 13247021 downstreamES 13252070 downstreamEE 13252798	https://betsholtzlab.org/Publications/MouseKidenyOB/splicing/GE_Lean_6w_vs_GE_Obese_6w/SE/462_Ccdc82_chr9_13246982_13247021_+@chr9_13249259_13249342_+@chr9_13252071_13252798_+.pdf	Online figure
ENSMUSG00000039977.15	Ccdc67	0.000668096	0.00658877	0.644	0	0.644	chr9	-	SE	exonStart_0base 15584134 exonEnd 15584329 upstreamES 15582524 upstreamEE 15582611 downstreamES 15587985 downstreamEE 15588089	https://betsholtzlab.org/Publications/MouseKidenyOB/splicing/GE_Lean_6w_vs_GE_Obese_6w/SE/463_Ccdc67_chr9_15587986_15588089_-@chr9_15584135_15584329_-@chr9_15582525_15582611_-.pdf	Online figure
ENSMUSG00000074500.10	Zfp558	3.59966e-05	0.000771795	1	0	1	chr9	-	SE	exonStart_0base 18469278 exonEnd 18469396 upstreamES 18468613 upstreamEE 18468702 downstreamES 18472885 downstreamEE 18472994	https://betsholtzlab.org/Publications/MouseKidenyOB/splicing/GE_Lean_6w_vs_GE_Obese_6w/SE/464_Zfp558_chr9_18472886_18472994_-@chr9_18469279_18469396_-@chr9_18468614_18468702_-.pdf	Online figure
ENSMUSG00000074500.10	Zfp558	4.23527e-07	5.70185e-05	1	0	1	chr9	-	SE	exonStart_0base 18469278 exonEnd 18469548 upstreamES 18468613 upstreamEE 18468702 downstreamES 18472885 downstreamEE 18474509	https://betsholtzlab.org/Publications/MouseKidenyOB/splicing/GE_Lean_6w_vs_GE_Obese_6w/SE/465_Zfp558_chr9_18472886_18474509_-@chr9_18469279_18469548_-@chr9_18468614_18468702_-.pdf	Online figure
ENSMUSG00000057133.13	Chd6	0.00359592	0.0233372	1	0.215	0.785	chr2	-	SE	exonStart_0base 160979368 exonEnd 160979498 upstreamES 160977458 upstreamEE 160977519 downstreamES 160981574 downstreamEE 160981678	https://betsholtzlab.org/Publications/MouseKidenyOB/splicing/GE_Lean_6w_vs_GE_Obese_6w/SE/466_Chd6_chr2_160981575_160981678_-@chr2_160979369_160979498_-@chr2_160977459_160977519_-.pdf	Online figure
ENSMUSG00000035919.15	Bbs9	0.000919532	0.00836977	0	0.651	-0.651	chr9	+	SE	exonStart_0base 22476569 exonEnd 22476625 upstreamES 22475866 upstreamEE 22476190 downstreamES 22490817 downstreamEE 22490940	https://betsholtzlab.org/Publications/MouseKidenyOB/splicing/GE_Lean_6w_vs_GE_Obese_6w/SE/467_Bbs9_chr9_22475867_22476190_+@chr9_22476570_22476625_+@chr9_22490818_22490940_+.pdf	Online figure
ENSMUSG00000019066.12	Rab3d	0.00599111	0.0332846	0.499	0.077	0.422	chr9	-	SE	exonStart_0base 21916416 exonEnd 21916564 upstreamES 21915704 upstreamEE 21915943 downstreamES 21918021 downstreamEE 21918089	https://betsholtzlab.org/Publications/MouseKidenyOB/splicing/GE_Lean_6w_vs_GE_Obese_6w/SE/468_Rab3d_chr9_21918022_21918089_-@chr9_21916417_21916564_-@chr9_21915705_21915943_-.pdf	Online figure
ENSMUSG00000066839.10	Ecsit	0.00158422	0.0124776	0.593	1	-0.407	chr9	-	SE	exonStart_0base 22084022 exonEnd 22084208 upstreamES 22076227 upstreamEE 22076645 downstreamES 22085356 downstreamEE 22085438	https://betsholtzlab.org/Publications/MouseKidenyOB/splicing/GE_Lean_6w_vs_GE_Obese_6w/SE/469_Ecsit_chr9_22085357_22085438_-@chr9_22084023_22084208_-@chr9_22076228_22076645_-.pdf	Online figure
ENSMUSG00000070315.10	4930581F22Rik	0.00146613	0.0117433	0.545	0	0.545	chr9	+	SE	exonStart_0base 35123600 exonEnd 35123694 upstreamES 35117368 upstreamEE 35118346 downstreamES 35126211 downstreamEE 35126390	https://betsholtzlab.org/Publications/MouseKidenyOB/splicing/GE_Lean_6w_vs_GE_Obese_6w/SE/470_4930581F22Rik_chr9_35117369_35118346_+@chr9_35123601_35123694_+@chr9_35126212_35126390_+.pdf	Online figure
ENSMUSG00000059890.14	Ube4a	4.96141e-05	0.000970325	0.527	1	-0.473	chr9	-	SE	exonStart_0base 44963336 exonEnd 44963432 upstreamES 44959978 upstreamEE 44960139 downstreamES 44965484 downstreamEE 44965519	https://betsholtzlab.org/Publications/MouseKidenyOB/splicing/GE_Lean_6w_vs_GE_Obese_6w/SE/471_Ube4a_chr9_44965485_44965519_-@chr9_44963337_44963432_-@chr9_44959979_44960139_-.pdf	Online figure
ENSMUSG00000059890.14	Ube4a	0.00105968	0.00926664	0.428	1	-0.572	chr9	-	SE	exonStart_0base 44963363 exonEnd 44963432 upstreamES 44959978 upstreamEE 44960139 downstreamES 44965484 downstreamEE 44965525	https://betsholtzlab.org/Publications/MouseKidenyOB/splicing/GE_Lean_6w_vs_GE_Obese_6w/SE/472_Ube4a_chr9_44965485_44965525_-@chr9_44963364_44963432_-@chr9_44959979_44960139_-.pdf	Online figure
ENSMUSG00000029385.13	Ccng2	0.0014486	0.0117044	1	0.561	0.439	chr5	+	SE	exonStart_0base 93271200 exonEnd 93271279 upstreamES 93270793 upstreamEE 93271044 downstreamES 93271362 downstreamEE 93271461	https://betsholtzlab.org/Publications/MouseKidenyOB/splicing/GE_Lean_6w_vs_GE_Obese_6w/SE/473_Ccng2_chr5_93270794_93271044_+@chr5_93271201_93271279_+@chr5_93271363_93271461_+.pdf	Online figure
ENSMUSG00000042790.14	Rnf214	0.000201778	0.0027548	1	0.043	0.957	chr9	-	SE	exonStart_0base 45866946 exonEnd 45867051 upstreamES 45866565 upstreamEE 45866661 downstreamES 45867499 downstreamEE 45867632	https://betsholtzlab.org/Publications/MouseKidenyOB/splicing/GE_Lean_6w_vs_GE_Obese_6w/SE/474_Rnf214_chr9_45867500_45867632_-@chr9_45866947_45867051_-@chr9_45866566_45866661_-.pdf	Online figure
ENSMUSG00000034908.14	Sidt2	0.000546761	0.00578334	0.421	0	0.421	chr9	-	SE	exonStart_0base 45947628 exonEnd 45947697 upstreamES 45946983 upstreamEE 45947055 downstreamES 45947835 downstreamEE 45947888	https://betsholtzlab.org/Publications/MouseKidenyOB/splicing/GE_Lean_6w_vs_GE_Obese_6w/SE/475_Sidt2_chr9_45947836_45947888_-@chr9_45947629_45947697_-@chr9_45946984_45947055_-.pdf	Online figure
ENSMUSG00000034908.14	Sidt2	0.00268996	0.0185175	1	0.407	0.593	chr9	-	SE	exonStart_0base 45948214 exonEnd 45948308 upstreamES 45946983 upstreamEE 45947055 downstreamES 45949775 downstreamEE 45949841	https://betsholtzlab.org/Publications/MouseKidenyOB/splicing/GE_Lean_6w_vs_GE_Obese_6w/SE/476_Sidt2_chr9_45949776_45949841_-@chr9_45948215_45948308_-@chr9_45946984_45947055_-.pdf	Online figure
ENSMUSG00000037845.13	Fdxacb1	1.25285e-06	9.97768e-05	0	1	-1	chr9	+	SE	exonStart_0base 50770631 exonEnd 50770790 upstreamES 50770061 upstreamEE 50770313 downstreamES 50771430 downstreamEE 50771537	https://betsholtzlab.org/Publications/MouseKidenyOB/splicing/GE_Lean_6w_vs_GE_Obese_6w/SE/477_Fdxacb1_chr9_50770062_50770313_+@chr9_50770632_50770790_+@chr9_50771431_50771537_+.pdf	Online figure
ENSMUSG00000058486.10	Wdr91	1.0417e-06	8.88903e-05	0	1	-1	chr6	-	SE	exonStart_0base 34909676 exonEnd 34909827 upstreamES 34909360 upstreamEE 34909540 downstreamES 34910696 downstreamEE 34910836	https://betsholtzlab.org/Publications/MouseKidenyOB/splicing/GE_Lean_6w_vs_GE_Obese_6w/SE/478_Wdr91_chr6_34910697_34910836_-@chr6_34909677_34909827_-@chr6_34909361_34909540_-.pdf	Online figure
ENSMUSG00000058486.10	Wdr91	8.37104e-07	7.94425e-05	0	1	-1	chr6	-	SE	exonStart_0base 34909713 exonEnd 34909827 upstreamES 34909460 upstreamEE 34909540 downstreamES 34910696 downstreamEE 34910842	https://betsholtzlab.org/Publications/MouseKidenyOB/splicing/GE_Lean_6w_vs_GE_Obese_6w/SE/479_Wdr91_chr6_34910697_34910842_-@chr6_34909714_34909827_-@chr6_34909461_34909540_-.pdf	Online figure
ENSMUSG00000032295.14	Man2c1	0.0089041	0.0441695	1	0.598	0.402	chr9	+	SE	exonStart_0base 57138853 exonEnd 57138969 upstreamES 57138396 upstreamEE 57138520 downstreamES 57139068 downstreamEE 57139154	https://betsholtzlab.org/Publications/MouseKidenyOB/splicing/GE_Lean_6w_vs_GE_Obese_6w/SE/480_Man2c1_chr9_57138397_57138520_+@chr9_57138854_57138969_+@chr9_57139069_57139154_+.pdf	Online figure
ENSMUSG00000004661.14	Arid3b	9.75359e-06	0.000367695	1	0	1	chr9	-	SE	exonStart_0base 57805430 exonEnd 57805539 upstreamES 57798041 upstreamEE 57798225 downstreamES 57810164 downstreamEE 57810237	https://betsholtzlab.org/Publications/MouseKidenyOB/splicing/GE_Lean_6w_vs_GE_Obese_6w/SE/481_Arid3b_chr9_57810165_57810237_-@chr9_57805431_57805539_-@chr9_57798042_57798225_-.pdf	Online figure
ENSMUSG00000021066.8	Atl1	0.00035374	0.0042095	0.843	0.113	0.73	chr12	+	SE	exonStart_0base 69960547 exonEnd 69960562 upstreamES 69959040 upstreamEE 69959472 downstreamES 69963227 downstreamEE 69964085	https://betsholtzlab.org/Publications/MouseKidenyOB/splicing/GE_Lean_6w_vs_GE_Obese_6w/SE/482_Atl1_chr12_69959041_69959472_+@chr12_69960548_69960562_+@chr12_69963228_69964085_+.pdf	Online figure
ENSMUSG00000032258.14	Lca5	3.04421e-05	0.000707858	1	0	1	chr9	-	SE	exonStart_0base 83428879 exonEnd 83428948 upstreamES 83426748 upstreamEE 83426961 downstreamES 83441040 downstreamEE 83441116	https://betsholtzlab.org/Publications/MouseKidenyOB/splicing/GE_Lean_6w_vs_GE_Obese_6w/SE/483_Lca5_chr9_83441041_83441116_-@chr9_83428880_83428948_-@chr9_83426749_83426961_-.pdf	Online figure
ENSMUSG00000032469.11	Dbr1	0.00195871	0.014631	0.578	1	-0.422	chr9	+	SE	exonStart_0base 99580138 exonEnd 99580363 upstreamES 99579356 upstreamEE 99579442 downstreamES 99582021 downstreamEE 99582058	https://betsholtzlab.org/Publications/MouseKidenyOB/splicing/GE_Lean_6w_vs_GE_Obese_6w/SE/484_Dbr1_chr9_99579357_99579442_+@chr9_99580139_99580363_+@chr9_99582022_99582058_+.pdf	Online figure
ENSMUSG00000032469.11	Dbr1	0.000254135	0.00324765	0.327	1	-0.673	chr9	+	SE	exonStart_0base 99580244 exonEnd 99580363 upstreamES 99579356 upstreamEE 99579442 downstreamES 99582021 downstreamEE 99582049	https://betsholtzlab.org/Publications/MouseKidenyOB/splicing/GE_Lean_6w_vs_GE_Obese_6w/SE/485_Dbr1_chr9_99579357_99579442_+@chr9_99580245_99580363_+@chr9_99582022_99582049_+.pdf	Online figure
ENSMUSG00000066442.15	Mthfs	6.17412e-06	0.000281128	1	0	1	chr9	+	SE	exonStart_0base 89226170 exonEnd 89226387 upstreamES 89215208 upstreamEE 89215470 downstreamES 89239841 downstreamEE 89239981	https://betsholtzlab.org/Publications/MouseKidenyOB/splicing/GE_Lean_6w_vs_GE_Obese_6w/SE/486_Mthfs_chr9_89215209_89215470_+@chr9_89226171_89226387_+@chr9_89239842_89239981_+.pdf	Online figure
ENSMUSG00000044477.10	Zfand3	0.000903498	0.00828129	1	0.353	0.647	chr17	+	SE	exonStart_0base 30060809 exonEnd 30060850 upstreamES 30005086 upstreamEE 30005308 downstreamES 30135322 downstreamEE 30135505	https://betsholtzlab.org/Publications/MouseKidenyOB/splicing/GE_Lean_6w_vs_GE_Obese_6w/SE/487_Zfand3_chr17_30005087_30005308_+@chr17_30060810_30060850_+@chr17_30135323_30135505_+.pdf	Online figure
ENSMUSG00000031826.18	Usp10	0.000140203	0.00208343	1	0.451	0.549	chr8	+	SE	exonStart_0base 119954788 exonEnd 119954933 upstreamES 119953179 upstreamEE 119953345 downstreamES 119956197 downstreamEE 119956263	https://betsholtzlab.org/Publications/MouseKidenyOB/splicing/GE_Lean_6w_vs_GE_Obese_6w/SE/488_Usp10_chr8_119953180_119953345_+@chr8_119954789_119954933_+@chr8_119956198_119956263_+.pdf	Online figure
ENSMUSG00000032411.14	Tfdp2	7.03337e-05	0.00123382	0	1	-1	chr9	+	SE	exonStart_0base 96247049 exonEnd 96247088 upstreamES 96223093 upstreamEE 96223198 downstreamES 96273838 downstreamEE 96273942	https://betsholtzlab.org/Publications/MouseKidenyOB/splicing/GE_Lean_6w_vs_GE_Obese_6w/SE/489_Tfdp2_chr9_96223094_96223198_+@chr9_96247050_96247088_+@chr9_96273839_96273942_+.pdf	Online figure
ENSMUSG00000032411.14	Tfdp2	0.00192944	0.0144683	1	0.481	0.519	chr9	+	SE	exonStart_0base 96247049 exonEnd 96247088 upstreamES 96232681 upstreamEE 96232748 downstreamES 96273838 downstreamEE 96273942	https://betsholtzlab.org/Publications/MouseKidenyOB/splicing/GE_Lean_6w_vs_GE_Obese_6w/SE/490_Tfdp2_chr9_96232682_96232748_+@chr9_96247050_96247088_+@chr9_96273839_96273942_+.pdf	Online figure
ENSMUSG00000094707.1	A830019P07Rik	0.000208922	0.00281267	0.423	0	0.423	chr19	-	SE	exonStart_0base 35842363 exonEnd 35842421 upstreamES 35841273 upstreamEE 35841329 downstreamES 35923486 downstreamEE 35923547	https://betsholtzlab.org/Publications/MouseKidenyOB/splicing/GE_Lean_6w_vs_GE_Obese_6w/SE/491_A830019P07Rik_chr19_35923487_35923547_-@chr19_35842364_35842421_-@chr19_35841274_35841329_-.pdf	Online figure
ENSMUSG00000054514.3	Atad3aos	3.18594e-06	0.000194937	0.1	1	-0.9	chr4	+	SE	exonStart_0base 155761384 exonEnd 155761777 upstreamES 155761220 upstreamEE 155761286 downstreamES 155763369 downstreamEE 155763560	https://betsholtzlab.org/Publications/MouseKidenyOB/splicing/GE_Lean_6w_vs_GE_Obese_6w/SE/492_Atad3aos_chr4_155761221_155761286_+@chr4_155761385_155761777_+@chr4_155763370_155763560_+.pdf	Online figure
ENSMUSG00000020827.17	Mink1	0.00015984	0.00230178	0.133	1	-0.867	chr11	+	SE	exonStart_0base 70608588 exonEnd 70608699 upstreamES 70608340 upstreamEE 70608426 downstreamES 70608839 downstreamEE 70608958	https://betsholtzlab.org/Publications/MouseKidenyOB/splicing/GE_Lean_6w_vs_GE_Obese_6w/SE/493_Mink1_chr11_70608341_70608426_+@chr11_70608589_70608699_+@chr11_70608840_70608958_+.pdf	Online figure
ENSMUSG00000000826.15	Dnajc5	5.40971e-05	0.00102009	0.116	0.927	-0.811	chr2	+	SE	exonStart_0base 181548925 exonEnd 181549000 upstreamES 181548669 upstreamEE 181548841 downstreamES 181549272 downstreamEE 181552249	https://betsholtzlab.org/Publications/MouseKidenyOB/splicing/GE_Lean_6w_vs_GE_Obese_6w/SE/494_Dnajc5_chr2_181548670_181548841_+@chr2_181548926_181549000_+@chr2_181549273_181552249_+.pdf	Online figure
ENSMUSG00000045503.15	Sys1	0.00415025	0.0258312	0.541	1	-0.459	chr2	+	SE	exonStart_0base 164467147 exonEnd 164467327 upstreamES 164463300 upstreamEE 164463368 downstreamES 164472137 downstreamEE 164472322	https://betsholtzlab.org/Publications/MouseKidenyOB/splicing/GE_Lean_6w_vs_GE_Obese_6w/SE/495_Sys1_chr2_164463301_164463368_+@chr2_164467148_164467327_+@chr2_164472138_164472322_+.pdf	Online figure
ENSMUSG00000037608.14	Bclaf1	3.63882e-05	0.000777311	0.28	0.905	-0.625	chr10	+	SE	exonStart_0base 20334498 exonEnd 20334645 upstreamES 20333253 upstreamEE 20333572 downstreamES 20339708 downstreamEE 20339921	https://betsholtzlab.org/Publications/MouseKidenyOB/splicing/GE_Lean_6w_vs_GE_Obese_6w/SE/496_Bclaf1_chr10_20333254_20333572_+@chr10_20334499_20334645_+@chr10_20339709_20339921_+.pdf	Online figure
ENSMUSG00000034684.11	Sema3f	1.24744e-06	9.97768e-05	1	0	1	chr9	-	SE	exonStart_0base 107691129 exonEnd 107691215 upstreamES 107689685 upstreamEE 107689779 downstreamES 107691355 downstreamEE 107691448	https://betsholtzlab.org/Publications/MouseKidenyOB/splicing/GE_Lean_6w_vs_GE_Obese_6w/SE/497_Sema3f_chr9_107691356_107691448_-@chr9_107691130_107691215_-@chr9_107689686_107689779_-.pdf	Online figure
ENSMUSG00000038876.10	Rnf146	0.00296365	0.0199509	0.572	0.129	0.443	chr10	-	SE	exonStart_0base 29361284 exonEnd 29361345 upstreamES 29354291 upstreamEE 29354447 downstreamES 29361963 downstreamEE 29362023	https://betsholtzlab.org/Publications/MouseKidenyOB/splicing/GE_Lean_6w_vs_GE_Obese_6w/SE/498_Rnf146_chr10_29361964_29362023_-@chr10_29361285_29361345_-@chr10_29354292_29354447_-.pdf	Online figure
ENSMUSG00000087177.6	E130307A14Rik	2.14637e-05	0.000581126	1	0	1	chr10	-	SE	exonStart_0base 39632949 exonEnd 39633016 upstreamES 39622624 upstreamEE 39622727 downstreamES 39681472 downstreamEE 39681549	https://betsholtzlab.org/Publications/MouseKidenyOB/splicing/GE_Lean_6w_vs_GE_Obese_6w/SE/499_E130307A14Rik_chr10_39681473_39681549_-@chr10_39632950_39633016_-@chr10_39622625_39622727_-.pdf	Online figure
ENSMUSG00000019841.14	Rev3l	0.000188289	0.00264565	0.217	1	-0.783	chr10	+	SE	exonStart_0base 39742690 exonEnd 39742818 upstreamES 39732126 upstreamEE 39732613 downstreamES 39783142 downstreamEE 39783332	https://betsholtzlab.org/Publications/MouseKidenyOB/splicing/GE_Lean_6w_vs_GE_Obese_6w/SE/500_Rev3l_chr10_39732127_39732613_+@chr10_39742691_39742818_+@chr10_39783143_39783332_+.pdf	Online figure
ENSMUSG00000020107.9	Anapc16	0.000415749	0.00473721	0.331	0.874	-0.543	chr10	-	SE	exonStart_0base 60002417 exonEnd 60002467 upstreamES 59990832 upstreamEE 59990907 downstreamES 60002955 downstreamEE 60002995	https://betsholtzlab.org/Publications/MouseKidenyOB/splicing/GE_Lean_6w_vs_GE_Obese_6w/SE/501_Anapc16_chr10_60002956_60002995_-@chr10_60002418_60002467_-@chr10_59990833_59990907_-.pdf	Online figure
ENSMUSG00000033099.8	Nol12	1.70587e-05	0.000509034	1	0	1	chr15	+	SE	exonStart_0base 78935808 exonEnd 78935899 upstreamES 78935207 upstreamEE 78935694 downstreamES 78936478 downstreamEE 78936581	https://betsholtzlab.org/Publications/MouseKidenyOB/splicing/GE_Lean_6w_vs_GE_Obese_6w/SE/502_Nol12_chr15_78935208_78935694_+@chr15_78935809_78935899_+@chr15_78936479_78936581_+.pdf	Online figure
ENSMUSG00000025261.16	Huwe1	0.000102168	0.00164292	0	0.704	-0.704	chrX	+	SE	exonStart_0base 151806271 exonEnd 151806407 upstreamES 151803346 upstreamEE 151803569 downstreamES 151806719 downstreamEE 151806860	https://betsholtzlab.org/Publications/MouseKidenyOB/splicing/GE_Lean_6w_vs_GE_Obese_6w/SE/503_Huwe1_chrX_151803347_151803569_+@chrX_151806272_151806407_+@chrX_151806720_151806860_+.pdf	Online figure
ENSMUSG00000025261.16	Huwe1	5.82142e-05	0.00107326	1	0.08	0.92	chrX	+	SE	exonStart_0base 151859454 exonEnd 151859688 upstreamES 151857807 upstreamEE 151857913 downstreamES 151860166 downstreamEE 151860268	https://betsholtzlab.org/Publications/MouseKidenyOB/splicing/GE_Lean_6w_vs_GE_Obese_6w/SE/504_Huwe1_chrX_151857808_151857913_+@chrX_151859455_151859688_+@chrX_151860167_151860268_+.pdf	Online figure
ENSMUSG00000025949.14	Pikfyve	2.27455e-05	0.000600108	1	0	1	chr1	+	SE	exonStart_0base 65264346 exonEnd 65264430 upstreamES 65262879 upstreamEE 65262975 downstreamES 65265248 downstreamEE 65265346	https://betsholtzlab.org/Publications/MouseKidenyOB/splicing/GE_Lean_6w_vs_GE_Obese_6w/SE/505_Pikfyve_chr1_65262880_65262975_+@chr1_65264347_65264430_+@chr1_65265249_65265346_+.pdf	Online figure
ENSMUSG00000035958.2	Tdp2	0.00035662	0.00421321	1	0.45	0.55	chr13	+	SE	exonStart_0base 24832009 exonEnd 24832095 upstreamES 24831678 upstreamEE 24831929 downstreamES 24836015 downstreamEE 24836186	https://betsholtzlab.org/Publications/MouseKidenyOB/splicing/GE_Lean_6w_vs_GE_Obese_6w/SE/506_Tdp2_chr13_24831679_24831929_+@chr13_24832010_24832095_+@chr13_24836016_24836186_+.pdf	Online figure
ENSMUSG00000035958.2	Tdp2	0.00367636	0.0236735	1	0.208	0.792	chr13	+	SE	exonStart_0base 24832688 exonEnd 24832826 upstreamES 24832009 upstreamEE 24832095 downstreamES 24836854 downstreamEE 24836946	https://betsholtzlab.org/Publications/MouseKidenyOB/splicing/GE_Lean_6w_vs_GE_Obese_6w/SE/507_Tdp2_chr13_24832010_24832095_+@chr13_24832689_24832826_+@chr13_24836855_24836946_+.pdf	Online figure
ENSMUSG00000033105.11	Lss	5.7303e-06	0.00027396	0	1	-1	chr10	+	SE	exonStart_0base 76531849 exonEnd 76532018 upstreamES 76531606 upstreamEE 76531674 downstreamES 76533512 downstreamEE 76533651	https://betsholtzlab.org/Publications/MouseKidenyOB/splicing/GE_Lean_6w_vs_GE_Obese_6w/SE/508_Lss_chr10_76531607_76531674_+@chr10_76531850_76532018_+@chr10_76533513_76533651_+.pdf	Online figure
ENSMUSG00000021932.12	Rnaseh2b	0.00329284	0.0217357	1	0.58	0.42	chr14	+	SE	exonStart_0base 62370471 exonEnd 62370552 upstreamES 62365258 upstreamEE 62365301 downstreamES 62372359 downstreamEE 62372992	https://betsholtzlab.org/Publications/MouseKidenyOB/splicing/GE_Lean_6w_vs_GE_Obese_6w/SE/509_Rnaseh2b_chr14_62365259_62365301_+@chr14_62370472_62370552_+@chr14_62372360_62372992_+.pdf	Online figure
ENSMUSG00000020023.16	Tmcc3	4.39991e-05	0.00088713	1	0	1	chr10	+	SE	exonStart_0base 94330072 exonEnd 94330145 upstreamES 94312136 upstreamEE 94312202 downstreamES 94375348 downstreamEE 94375595	https://betsholtzlab.org/Publications/MouseKidenyOB/splicing/GE_Lean_6w_vs_GE_Obese_6w/SE/510_Tmcc3_chr10_94312137_94312202_+@chr10_94330073_94330145_+@chr10_94375349_94375595_+.pdf	Online figure
ENSMUSG00000067369.11	Trmt2b	0.00705867	0.0372835	0.504	1	-0.496	chrX	-	SE	exonStart_0base 134238466 exonEnd 134238586 upstreamES 134238142 upstreamEE 134238242 downstreamES 134240078 downstreamEE 134240180	https://betsholtzlab.org/Publications/MouseKidenyOB/splicing/GE_Lean_6w_vs_GE_Obese_6w/SE/511_Trmt2b_chrX_134240079_134240180_-@chrX_134238467_134238586_-@chrX_134238143_134238242_-.pdf	Online figure
ENSMUSG00000020137.4	Thap2	0.000606202	0.00623322	0.375	1	-0.625	chr10	-	SE	exonStart_0base 115376351 exonEnd 115376547 upstreamES 115369965 upstreamEE 115372946 downstreamES 115384204 downstreamEE 115384435	https://betsholtzlab.org/Publications/MouseKidenyOB/splicing/GE_Lean_6w_vs_GE_Obese_6w/SE/512_Thap2_chr10_115384205_115384435_-@chr10_115376352_115376547_-@chr10_115369966_115372946_-.pdf	Online figure
ENSMUSG00000027333.17	Smox	0.000166922	0.00239187	0.351	1	-0.649	chr2	+	SE	exonStart_0base 131522147 exonEnd 131522219 upstreamES 131520411 upstreamEE 131521171 downstreamES 131524742 downstreamEE 131525172	https://betsholtzlab.org/Publications/MouseKidenyOB/splicing/GE_Lean_6w_vs_GE_Obese_6w/SE/513_Smox_chr2_131520412_131521171_+@chr2_131522148_131522219_+@chr2_131524743_131525172_+.pdf	Online figure
ENSMUSG00000020170.3	Frs2	0.00262232	0.018169	0.187	1	-0.813	chr10	-	SE	exonStart_0base 117076810 exonEnd 117076974 upstreamES 117070128 upstreamEE 117074879 downstreamES 117077511 downstreamEE 117077670	https://betsholtzlab.org/Publications/MouseKidenyOB/splicing/GE_Lean_6w_vs_GE_Obese_6w/SE/514_Frs2_chr10_117077512_117077670_-@chr10_117076811_117076974_-@chr10_117070129_117074879_-.pdf	Online figure
ENSMUSG00000036833.15	Pnpla7	0.000858666	0.00799167	0.503	0	0.503	chr2	+	SE	exonStart_0base 24978125 exonEnd 24978221 upstreamES 24976100 upstreamEE 24976313 downstreamES 24980033 downstreamEE 24980102	https://betsholtzlab.org/Publications/MouseKidenyOB/splicing/GE_Lean_6w_vs_GE_Obese_6w/SE/515_Pnpla7_chr2_24976101_24976313_+@chr2_24978126_24978221_+@chr2_24980034_24980102_+.pdf	Online figure
ENSMUSG00000020124.9	Usp15	0.000454106	0.00506737	0.393	1	-0.607	chr10	-	SE	exonStart_0base 123153040 exonEnd 123153127 upstreamES 123146793 upstreamEE 123146938 downstreamES 123168226 downstreamEE 123168372	https://betsholtzlab.org/Publications/MouseKidenyOB/splicing/GE_Lean_6w_vs_GE_Obese_6w/SE/516_Usp15_chr10_123168227_123168372_-@chr10_123153041_123153127_-@chr10_123146794_123146938_-.pdf	Online figure
ENSMUSG00000025404.14	R3hdm2	0.00786961	0.0400762	1	0.278	0.722	chr10	+	SE	exonStart_0base 127462205 exonEnd 127462283 upstreamES 127459464 upstreamEE 127459575 downstreamES 127464981 downstreamEE 127465013	https://betsholtzlab.org/Publications/MouseKidenyOB/splicing/GE_Lean_6w_vs_GE_Obese_6w/SE/517_R3hdm2_chr10_127459465_127459575_+@chr10_127462206_127462283_+@chr10_127464982_127465013_+.pdf	Online figure
ENSMUSG00000024317.13	Rnf138	1.11022e-16	3.21354e-13	0.008	0.551	-0.543	chr18	+	SE	exonStart_0base 21024408 exonEnd 21024516 upstreamES 21020887 upstreamEE 21020999 downstreamES 21026085 downstreamEE 21028223	https://betsholtzlab.org/Publications/MouseKidenyOB/splicing/GE_Lean_6w_vs_GE_Obese_6w/SE/518_Rnf138_chr18_21020888_21020999_+@chr18_21024409_21024516_+@chr18_21026086_21028223_+.pdf	Online figure
ENSMUSG00000026771.13	Spopl	0.000951986	0.00855753	0.472	0	0.472	chr2	-	SE	exonStart_0base 23541518 exonEnd 23541615 upstreamES 23537460 upstreamEE 23537638 downstreamES 23543196 downstreamEE 23543324	https://betsholtzlab.org/Publications/MouseKidenyOB/splicing/GE_Lean_6w_vs_GE_Obese_6w/SE/519_Spopl_chr2_23543197_23543324_-@chr2_23541519_23541615_-@chr2_23537461_23537638_-.pdf	Online figure
ENSMUSG00000026771.13	Spopl	0.000260716	0.00329538	0.314	1	-0.686	chr2	-	SE	exonStart_0base 23545152 exonEnd 23545274 upstreamES 23544745 upstreamEE 23544897 downstreamES 23545443 downstreamEE 23545579	https://betsholtzlab.org/Publications/MouseKidenyOB/splicing/GE_Lean_6w_vs_GE_Obese_6w/SE/520_Spopl_chr2_23545444_23545579_-@chr2_23545153_23545274_-@chr2_23544746_23544897_-.pdf	Online figure
ENSMUSG00000026430.14	Rassf5	3.96216e-08	1.34923e-05	0	1	-1	chr1	-	SE	exonStart_0base 131180552 exonEnd 131180668 upstreamES 131176409 upstreamEE 131178677 downstreamES 131181153 downstreamEE 131181451	https://betsholtzlab.org/Publications/MouseKidenyOB/splicing/GE_Lean_6w_vs_GE_Obese_6w/SE/521_Rassf5_chr1_131181154_131181451_-@chr1_131180553_131180668_-@chr1_131176410_131178677_-.pdf	Online figure
ENSMUSG00000032560.12	Dnajc13	0.00596078	0.0332437	1	0.481	0.519	chr9	-	SE	exonStart_0base 104184582 exonEnd 104184718 upstreamES 104182504 upstreamEE 104182689 downstreamES 104186710 downstreamEE 104186789	https://betsholtzlab.org/Publications/MouseKidenyOB/splicing/GE_Lean_6w_vs_GE_Obese_6w/SE/522_Dnajc13_chr9_104186711_104186789_-@chr9_104184583_104184718_-@chr9_104182505_104182689_-.pdf	Online figure
ENSMUSG00000000384.14	Tbrg4	3.5535e-06	0.000203675	0	1	-1	chr11	-	SE	exonStart_0base 6619971 exonEnd 6620143 upstreamES 6619555 upstreamEE 6619713 downstreamES 6620741 downstreamEE 6621065	https://betsholtzlab.org/Publications/MouseKidenyOB/splicing/GE_Lean_6w_vs_GE_Obese_6w/SE/523_Tbrg4_chr11_6620742_6621065_-@chr11_6619972_6620143_-@chr11_6619556_6619713_-.pdf	Online figure
ENSMUSG00000000384.14	Tbrg4	2.38344e-06	0.00016535	0	1	-1	chr11	-	SE	exonStart_0base 6619971 exonEnd 6620221 upstreamES 6619555 upstreamEE 6619713 downstreamES 6620741 downstreamEE 6620915	https://betsholtzlab.org/Publications/MouseKidenyOB/splicing/GE_Lean_6w_vs_GE_Obese_6w/SE/524_Tbrg4_chr11_6620742_6620915_-@chr11_6619972_6620221_-@chr11_6619556_6619713_-.pdf	Online figure
ENSMUSG00000028995.13	Fam126a	0.000663155	0.00657363	1	0.43	0.57	chr5	-	SE	exonStart_0base 23966133 exonEnd 23966431 upstreamES 23964478 upstreamEE 23965358 downstreamES 23979487 downstreamEE 23979647	https://betsholtzlab.org/Publications/MouseKidenyOB/splicing/GE_Lean_6w_vs_GE_Obese_6w/SE/525_Fam126a_chr5_23979488_23979647_-@chr5_23966134_23966431_-@chr5_23964479_23965358_-.pdf	Online figure
ENSMUSG00000020176.16	Grb10	0.00260005	0.0181127	0.407	1	-0.593	chr11	-	SE	exonStart_0base 11954743 exonEnd 11954908 upstreamES 11951502 upstreamEE 11951659 downstreamES 11967531 downstreamEE 11967685	https://betsholtzlab.org/Publications/MouseKidenyOB/splicing/GE_Lean_6w_vs_GE_Obese_6w/SE/526_Grb10_chr11_11967532_11967685_-@chr11_11954744_11954908_-@chr11_11951503_11951659_-.pdf	Online figure
ENSMUSG00000020275.9	Rel	0.00889241	0.0441494	1	0.563	0.437	chr11	-	SE	exonStart_0base 23748750 exonEnd 23748891 upstreamES 23745745 upstreamEE 23745850 downstreamES 23753216 downstreamEE 23753308	https://betsholtzlab.org/Publications/MouseKidenyOB/splicing/GE_Lean_6w_vs_GE_Obese_6w/SE/527_Rel_chr11_23753217_23753308_-@chr11_23748751_23748891_-@chr11_23745746_23745850_-.pdf	Online figure
ENSMUSG00000020459.13	Mtif2	2.75685e-05	0.000693887	1	0.415	0.585	chr11	+	SE	exonStart_0base 29530580 exonEnd 29530692 upstreamES 29529928 upstreamEE 29530154 downstreamES 29533225 downstreamEE 29533397	https://betsholtzlab.org/Publications/MouseKidenyOB/splicing/GE_Lean_6w_vs_GE_Obese_6w/SE/528_Mtif2_chr11_29529929_29530154_+@chr11_29530581_29530692_+@chr11_29533226_29533397_+.pdf	Online figure
ENSMUSG00000024426.16	Atat1	7.5403e-05	0.00128424	0.399	1	-0.601	chr17	-	SE	exonStart_0base 35904107 exonEnd 35904176 upstreamES 35901982 upstreamEE 35902054 downstreamES 35904289 downstreamEE 35904327	https://betsholtzlab.org/Publications/MouseKidenyOB/splicing/GE_Lean_6w_vs_GE_Obese_6w/SE/529_Atat1_chr17_35904290_35904327_-@chr17_35904108_35904176_-@chr17_35901983_35902054_-.pdf	Online figure
ENSMUSG00000020271.16	Fbxw11	9.97318e-06	0.000370237	1	0.515	0.485	chr11	+	SE	exonStart_0base 32708187 exonEnd 32708250 upstreamES 32680200 upstreamEE 32680302 downstreamES 32711771 downstreamEE 32711997	https://betsholtzlab.org/Publications/MouseKidenyOB/splicing/GE_Lean_6w_vs_GE_Obese_6w/SE/530_Fbxw11_chr11_32680201_32680302_+@chr11_32708188_32708250_+@chr11_32711772_32711997_+.pdf	Online figure
ENSMUSG00000038482.10	Tfdp1	0.00748261	0.0388492	1	0.563	0.437	chr8	+	SE	exonStart_0base 13369458 exonEnd 13369580 upstreamES 13365088 upstreamEE 13365195 downstreamES 13370480 downstreamEE 13370646	https://betsholtzlab.org/Publications/MouseKidenyOB/splicing/GE_Lean_6w_vs_GE_Obese_6w/SE/531_Tfdp1_chr8_13365089_13365195_+@chr8_13369459_13369580_+@chr8_13370481_13370646_+.pdf	Online figure
ENSMUSG00000036644.14	Tbc1d9b	0.000104976	0.00166921	0.589	1	-0.411	chr11	+	SE	exonStart_0base 50168168 exonEnd 50168225 upstreamES 50163824 upstreamEE 50163896 downstreamES 50168695 downstreamEE 50168802	https://betsholtzlab.org/Publications/MouseKidenyOB/splicing/GE_Lean_6w_vs_GE_Obese_6w/SE/532_Tbc1d9b_chr11_50163825_50163896_+@chr11_50168169_50168225_+@chr11_50168696_50168802_+.pdf	Online figure
ENSMUSG00000049470.12	Aff4	0.0076805	0.0394871	1	0.265	0.735	chr11	+	SE	exonStart_0base 53380585 exonEnd 53380672 upstreamES 53375588 upstreamEE 53375633 downstreamES 53389754 downstreamEE 53389791	https://betsholtzlab.org/Publications/MouseKidenyOB/splicing/GE_Lean_6w_vs_GE_Obese_6w/SE/533_Aff4_chr11_53375589_53375633_+@chr11_53380586_53380672_+@chr11_53389755_53389791_+.pdf	Online figure
ENSMUSG00000036646.12	Man1b1	0.00025597	0.00325672	0.491	1	-0.509	chr2	+	SE	exonStart_0base 25334376 exonEnd 25334492 upstreamES 25333434 upstreamEE 25333543 downstreamES 25338112 downstreamEE 25338267	https://betsholtzlab.org/Publications/MouseKidenyOB/splicing/GE_Lean_6w_vs_GE_Obese_6w/SE/534_Man1b1_chr2_25333435_25333543_+@chr2_25334377_25334492_+@chr2_25338113_25338267_+.pdf	Online figure
ENSMUSG00000037533.16	Rapgef6	0.00979757	0.0471472	0.569	1	-0.431	chr11	+	SE	exonStart_0base 54694269 exonEnd 54694572 upstreamES 54691237 upstreamEE 54691740 downstreamES 54696079 downstreamEE 54696979	https://betsholtzlab.org/Publications/MouseKidenyOB/splicing/GE_Lean_6w_vs_GE_Obese_6w/SE/535_Rapgef6_chr11_54691238_54691740_+@chr11_54694270_54694572_+@chr11_54696080_54696979_+.pdf	Online figure
ENSMUSG00000009894.14	Snap47	1.46666e-05	0.000466509	0.088	1	-0.912	chr11	-	SE	exonStart_0base 59442791 exonEnd 59442912 upstreamES 59438448 upstreamEE 59438516 downstreamES 59449914 downstreamEE 59449999	https://betsholtzlab.org/Publications/MouseKidenyOB/splicing/GE_Lean_6w_vs_GE_Obese_6w/SE/536_Snap47_chr11_59449915_59449999_-@chr11_59442792_59442912_-@chr11_59438449_59438516_-.pdf	Online figure
ENSMUSG00000054519.8	Zfp867	0.000147441	0.00216634	0.308	1	-0.692	chr11	-	SE	exonStart_0base 59465011 exonEnd 59465072 upstreamES 59461196 upstreamEE 59464286 downstreamES 59465450 downstreamEE 59465577	https://betsholtzlab.org/Publications/MouseKidenyOB/splicing/GE_Lean_6w_vs_GE_Obese_6w/SE/537_Zfp867_chr11_59465451_59465577_-@chr11_59465012_59465072_-@chr11_59461197_59464286_-.pdf	Online figure
ENSMUSG00000003134.9	Tbc1d8	0.00229348	0.0165342	0.358	1	-0.642	chr1	-	SE	exonStart_0base 39391116 exonEnd 39391287 upstreamES 39389307 upstreamEE 39389458 downstreamES 39392056 downstreamEE 39392254	https://betsholtzlab.org/Publications/MouseKidenyOB/splicing/GE_Lean_6w_vs_GE_Obese_6w/SE/538_Tbc1d8_chr1_39392057_39392254_-@chr1_39391117_39391287_-@chr1_39389308_39389458_-.pdf	Online figure
ENSMUSG00000001036.16	Epn2	0.000202244	0.0027548	0	0.7	-0.7	chr11	-	SE	exonStart_0base 61548007 exonEnd 61548042 upstreamES 61546505 upstreamEE 61546911 downstreamES 61553509 downstreamEE 61553579	https://betsholtzlab.org/Publications/MouseKidenyOB/splicing/GE_Lean_6w_vs_GE_Obese_6w/SE/539_Epn2_chr11_61553510_61553579_-@chr11_61548008_61548042_-@chr11_61546506_61546911_-.pdf	Online figure
ENSMUSG00000001036.16	Epn2	1.2582e-06	9.97768e-05	1	0.076	0.924	chr11	-	SE	exonStart_0base 61553509 exonEnd 61553579 upstreamES 61546691 upstreamEE 61546911 downstreamES 61565821 downstreamEE 61565894	https://betsholtzlab.org/Publications/MouseKidenyOB/splicing/GE_Lean_6w_vs_GE_Obese_6w/SE/540_Epn2_chr11_61565822_61565894_-@chr11_61553510_61553579_-@chr11_61546692_61546911_-.pdf	Online figure
ENSMUSG00000029179.13	Zcchc4	0.000337786	0.00405694	0.391	1	-0.609	chr5	+	SE	exonStart_0base 52804378 exonEnd 52804451 upstreamES 52796581 upstreamEE 52796659 downstreamES 52806956 downstreamEE 52807107	https://betsholtzlab.org/Publications/MouseKidenyOB/splicing/GE_Lean_6w_vs_GE_Obese_6w/SE/541_Zcchc4_chr5_52796582_52796659_+@chr5_52804379_52804451_+@chr5_52806957_52807107_+.pdf	Online figure
ENSMUSG00000033365.13	Ipo13	0.00660421	0.0355132	0.537	1	-0.463	chr4	-	SE	exonStart_0base 117905442 exonEnd 117905583 upstreamES 117905180 upstreamEE 117905322 downstreamES 117911772 downstreamEE 117912509	https://betsholtzlab.org/Publications/MouseKidenyOB/splicing/GE_Lean_6w_vs_GE_Obese_6w/SE/542_Ipo13_chr4_117911773_117912509_-@chr4_117905443_117905583_-@chr4_117905181_117905322_-.pdf	Online figure
ENSMUSG00000002052.6	Supt6	5.3054e-08	1.61647e-05	1	0	1	chr11	-	SE	exonStart_0base 78220596 exonEnd 78220747 upstreamES 78219882 upstreamEE 78220090 downstreamES 78221120 downstreamEE 78221248	https://betsholtzlab.org/Publications/MouseKidenyOB/splicing/GE_Lean_6w_vs_GE_Obese_6w/SE/543_Supt6_chr11_78221121_78221248_-@chr11_78220597_78220747_-@chr11_78219883_78220090_-.pdf	Online figure
ENSMUSG00000027164.8	Traf6	2.55865e-08	1.13939e-05	1	0	1	chr2	+	SE	exonStart_0base 101680824 exonEnd 101681027 upstreamES 101678439 upstreamEE 101678620 downstreamES 101684478 downstreamEE 101684796	https://betsholtzlab.org/Publications/MouseKidenyOB/splicing/GE_Lean_6w_vs_GE_Obese_6w/SE/544_Traf6_chr2_101678440_101678620_+@chr2_101680825_101681027_+@chr2_101684479_101684796_+.pdf	Online figure
ENSMUSG00000020876.13	Snx11	9.95255e-05	0.00160488	0.175	0.73	-0.555	chr11	-	SE	exonStart_0base 96775373 exonEnd 96775433 upstreamES 96774440 upstreamEE 96774495 downstreamES 96776967 downstreamEE 96777061	https://betsholtzlab.org/Publications/MouseKidenyOB/splicing/GE_Lean_6w_vs_GE_Obese_6w/SE/545_Snx11_chr11_96776968_96777061_-@chr11_96775374_96775433_-@chr11_96774441_96774495_-.pdf	Online figure
ENSMUSG00000045983.14	Eif4g1	0.000282575	0.00354074	1	0.188	0.812	chr16	+	SE	exonStart_0base 20673598 exonEnd 20673655 upstreamES 20672748 upstreamEE 20672876 downstreamES 20673867 downstreamEE 20673961	https://betsholtzlab.org/Publications/MouseKidenyOB/splicing/GE_Lean_6w_vs_GE_Obese_6w/SE/546_Eif4g1_chr16_20672749_20672876_+@chr16_20673599_20673655_+@chr16_20673868_20673961_+.pdf	Online figure
ENSMUSG00000037935.15	Smarce1	0.000140443	0.00208343	1	0.135	0.865	chr11	-	SE	exonStart_0base 99224720 exonEnd 99225142 upstreamES 99220654 upstreamEE 99220735 downstreamES 99228274 downstreamEE 99228318	https://betsholtzlab.org/Publications/MouseKidenyOB/splicing/GE_Lean_6w_vs_GE_Obese_6w/SE/547_Smarce1_chr11_99228275_99228318_-@chr11_99224721_99225142_-@chr11_99220655_99220735_-.pdf	Online figure
ENSMUSG00000037935.15	Smarce1	0.00199273	0.0147896	1	0.323	0.677	chr11	-	SE	exonStart_0base 99225037 exonEnd 99225142 upstreamES 99220654 upstreamEE 99220735 downstreamES 99228274 downstreamEE 99228318	https://betsholtzlab.org/Publications/MouseKidenyOB/splicing/GE_Lean_6w_vs_GE_Obese_6w/SE/548_Smarce1_chr11_99228275_99228318_-@chr11_99225038_99225142_-@chr11_99220655_99220735_-.pdf	Online figure
ENSMUSG00000017801.14	Mlx	5.32954e-07	6.17054e-05	0.932	0.496	0.436	chr11	+	SE	exonStart_0base 101088235 exonEnd 101088325 upstreamES 101087753 upstreamEE 101087790 downstreamES 101088597 downstreamEE 101088704	https://betsholtzlab.org/Publications/MouseKidenyOB/splicing/GE_Lean_6w_vs_GE_Obese_6w/SE/549_Mlx_chr11_101087754_101087790_+@chr11_101088236_101088325_+@chr11_101088598_101088704_+.pdf	Online figure
ENSMUSG00000008855.16	Hdac5	0.000194099	0.00268866	1	0.41	0.59	chr11	-	SE	exonStart_0base 102218415 exonEnd 102218487 upstreamES 102206906 upstreamEE 102207166 downstreamES 102224733 downstreamEE 102224955	https://betsholtzlab.org/Publications/MouseKidenyOB/splicing/GE_Lean_6w_vs_GE_Obese_6w/SE/550_Hdac5_chr11_102224734_102224955_-@chr11_102218416_102218487_-@chr11_102206907_102207166_-.pdf	Online figure
ENSMUSG00000008855.16	Hdac5	0.000234521	0.00305089	1	0.441	0.559	chr11	-	SE	exonStart_0base 102218415 exonEnd 102218490 upstreamES 102206906 upstreamEE 102207166 downstreamES 102224733 downstreamEE 102224955	https://betsholtzlab.org/Publications/MouseKidenyOB/splicing/GE_Lean_6w_vs_GE_Obese_6w/SE/551_Hdac5_chr11_102224734_102224955_-@chr11_102218416_102218490_-@chr11_102206907_102207166_-.pdf	Online figure
ENSMUSG00000107283.2	Mpv17	0.000274375	0.00345295	1	0.542	0.458	chr5	-	SE	exonStart_0base 31144893 exonEnd 31145278 upstreamES 31144073 upstreamEE 31144752 downstreamES 31145494 downstreamEE 31145590	https://betsholtzlab.org/Publications/MouseKidenyOB/splicing/GE_Lean_6w_vs_GE_Obese_6w/SE/552_Mpv17_chr5_31145495_31145590_-@chr5_31144894_31145278_-@chr5_31144074_31144752_-.pdf	Online figure
ENSMUSG00000069631.13	Strada	6.59847e-05	0.00117534	1	0	1	chr11	-	SE	exonStart_0base 106184561 exonEnd 106184619 upstreamES 106173678 upstreamEE 106173781 downstreamES 106187100 downstreamEE 106187180	https://betsholtzlab.org/Publications/MouseKidenyOB/splicing/GE_Lean_6w_vs_GE_Obese_6w/SE/553_Strada_chr11_106187101_106187180_-@chr11_106184562_106184619_-@chr11_106173679_106173781_-.pdf	Online figure
ENSMUSG00000020718.11	Polg2	0.000207673	0.00280893	0.259	1	-0.741	chr11	-	SE	exonStart_0base 106778716 exonEnd 106778807 upstreamES 106777434 upstreamEE 106777561 downstreamES 106779083 downstreamEE 106779502	https://betsholtzlab.org/Publications/MouseKidenyOB/splicing/GE_Lean_6w_vs_GE_Obese_6w/SE/554_Polg2_chr11_106779084_106779502_-@chr11_106778717_106778807_-@chr11_106777435_106777561_-.pdf	Online figure
ENSMUSG00000000142.14	Axin2	9.7024e-06	0.000367695	0	1	-1	chr11	+	SE	exonStart_0base 108944509 exonEnd 108944605 upstreamES 108943620 upstreamEE 108943886 downstreamES 108945879 downstreamEE 108946047	https://betsholtzlab.org/Publications/MouseKidenyOB/splicing/GE_Lean_6w_vs_GE_Obese_6w/SE/555_Axin2_chr11_108943621_108943886_+@chr11_108944510_108944605_+@chr11_108945880_108946047_+.pdf	Online figure
ENSMUSG00000020752.10	Recql5	3.3308e-05	0.000730379	1	0.136	0.864	chr11	-	SE	exonStart_0base 115904884 exonEnd 115905042 upstreamES 115897040 upstreamEE 115897259 downstreamES 115916978 downstreamEE 115917058	https://betsholtzlab.org/Publications/MouseKidenyOB/splicing/GE_Lean_6w_vs_GE_Obese_6w/SE/556_Recql5_chr11_115916979_115917058_-@chr11_115904885_115905042_-@chr11_115897041_115897259_-.pdf	Online figure
ENSMUSG00000020776.17	Fbf1	4.26585e-05	0.000873982	0	1	-1	chr11	-	SE	exonStart_0base 116167132 exonEnd 116167228 upstreamES 116165831 upstreamEE 116165912 downstreamES 116167551 downstreamEE 116168154	https://betsholtzlab.org/Publications/MouseKidenyOB/splicing/GE_Lean_6w_vs_GE_Obese_6w/SE/557_Fbf1_chr11_116167552_116168154_-@chr11_116167133_116167228_-@chr11_116165832_116165912_-.pdf	Online figure
ENSMUSG00000017715.10	Pgs1	0.000240619	0.00311796	1	0.526	0.474	chr11	+	SE	exonStart_0base 118014646 exonEnd 118014722 upstreamES 118005369 upstreamEE 118005891 downstreamES 118019606 downstreamEE 118019732	https://betsholtzlab.org/Publications/MouseKidenyOB/splicing/GE_Lean_6w_vs_GE_Obese_6w/SE/558_Pgs1_chr11_118005370_118005891_+@chr11_118014647_118014722_+@chr11_118019607_118019732_+.pdf	Online figure
ENSMUSG00000039908.13	Slc26a11	0.00534214	0.0307718	0.275	1	-0.725	chr11	+	SE	exonStart_0base 119362216 exonEnd 119362296 upstreamES 119359296 upstreamEE 119359382 downstreamES 119363399 downstreamEE 119363542	https://betsholtzlab.org/Publications/MouseKidenyOB/splicing/GE_Lean_6w_vs_GE_Obese_6w/SE/559_Slc26a11_chr11_119359297_119359382_+@chr11_119362217_119362296_+@chr11_119363400_119363542_+.pdf	Online figure
ENSMUSG00000025156.15	Gps1	6.1357e-05	0.00111961	0	1	-1	chr11	+	SE	exonStart_0base 120784646 exonEnd 120784725 upstreamES 120784274 upstreamEE 120784342 downstreamES 120785120 downstreamEE 120785213	https://betsholtzlab.org/Publications/MouseKidenyOB/splicing/GE_Lean_6w_vs_GE_Obese_6w/SE/560_Gps1_chr11_120784275_120784342_+@chr11_120784647_120784725_+@chr11_120785121_120785213_+.pdf	Online figure
ENSMUSG00000020661.14	Dnmt3a	0.00785568	0.0400762	0.58	1	-0.42	chr12	+	SE	exonStart_0base 3901548 exonEnd 3901694 upstreamES 3900276 upstreamEE 3900361 downstreamES 3902380 downstreamEE 3902471	https://betsholtzlab.org/Publications/MouseKidenyOB/splicing/GE_Lean_6w_vs_GE_Obese_6w/SE/561_Dnmt3a_chr12_3900277_3900361_+@chr12_3901549_3901694_+@chr12_3902381_3902471_+.pdf	Online figure
ENSMUSG00000052632.14	Asap2	0.000198756	0.00272009	0.385	1	-0.615	chr12	+	SE	exonStart_0base 21229238 exonEnd 21229287 upstreamES 21224304 upstreamEE 21224392 downstreamES 21229373 downstreamEE 21229540	https://betsholtzlab.org/Publications/MouseKidenyOB/splicing/GE_Lean_6w_vs_GE_Obese_6w/SE/562_Asap2_chr12_21224305_21224392_+@chr12_21229239_21229287_+@chr12_21229374_21229540_+.pdf	Online figure
ENSMUSG00000026121.12	Sema4c	0.000643943	0.00646063	0.218	1	-0.782	chr1	-	SE	exonStart_0base 36556802 exonEnd 36556929 upstreamES 36555931 upstreamEE 36556077 downstreamES 36557359 downstreamEE 36557534	https://betsholtzlab.org/Publications/MouseKidenyOB/splicing/GE_Lean_6w_vs_GE_Obese_6w/SE/563_Sema4c_chr1_36557360_36557534_-@chr1_36556803_36556929_-@chr1_36555932_36556077_-.pdf	Online figure
ENSMUSG00000002688.7	Prkd1	9.97701e-06	0.000370237	0	1	-1	chr12	-	SE	exonStart_0base 50419852 exonEnd 50419876 upstreamES 50394829 upstreamEE 50395040 downstreamES 50425438 downstreamEE 50425599	https://betsholtzlab.org/Publications/MouseKidenyOB/splicing/GE_Lean_6w_vs_GE_Obese_6w/SE/564_Prkd1_chr12_50425439_50425599_-@chr12_50419853_50419876_-@chr12_50394830_50395040_-.pdf	Online figure
ENSMUSG00000020954.14	Strn3	1.27985e-05	0.000438405	1	0	1	chr12	-	SE	exonStart_0base 51643103 exonEnd 51643214 upstreamES 51633578 upstreamEE 51633719 downstreamES 51647993 downstreamEE 51648135	https://betsholtzlab.org/Publications/MouseKidenyOB/splicing/GE_Lean_6w_vs_GE_Obese_6w/SE/565_Strn3_chr12_51647994_51648135_-@chr12_51643104_51643214_-@chr12_51633579_51633719_-.pdf	Online figure
ENSMUSG00000060073.8	Psma3	4.45773e-05	0.00088713	1	0	1	chr12	+	SE	exonStart_0base 70990484 exonEnd 70990531 upstreamES 70986862 upstreamEE 70986935 downstreamES 70993012 downstreamEE 70993080	https://betsholtzlab.org/Publications/MouseKidenyOB/splicing/GE_Lean_6w_vs_GE_Obese_6w/SE/566_Psma3_chr12_70986863_70986935_+@chr12_70990485_70990531_+@chr12_70993013_70993080_+.pdf	Online figure
ENSMUSG00000060073.8	Psma3	0.00910227	0.0449125	1	0.295	0.705	chr12	+	SE	exonStart_0base 70993012 exonEnd 70993080 upstreamES 70990484 upstreamEE 70990531 downstreamES 70993505 downstreamEE 70993570	https://betsholtzlab.org/Publications/MouseKidenyOB/splicing/GE_Lean_6w_vs_GE_Obese_6w/SE/567_Psma3_chr12_70990485_70990531_+@chr12_70993013_70993080_+@chr12_70993506_70993570_+.pdf	Online figure
ENSMUSG00000021079.14	Timm9	3.81066e-06	0.000214174	0.266	1	-0.734	chr12	-	SE	exonStart_0base 71132000 exonEnd 71132086 upstreamES 71126332 upstreamEE 71126397 downstreamES 71136554 downstreamEE 71136675	https://betsholtzlab.org/Publications/MouseKidenyOB/splicing/GE_Lean_6w_vs_GE_Obese_6w/SE/568_Timm9_chr12_71136555_71136675_-@chr12_71132001_71132086_-@chr12_71126333_71126397_-.pdf	Online figure
ENSMUSG00000024969.14	Mark2	6.23649e-06	0.000281128	1	0	1	chr19	-	SE	exonStart_0base 7279110 exonEnd 7279278 upstreamES 7278041 upstreamEE 7278086 downstreamES 7279985 downstreamEE 7280012	https://betsholtzlab.org/Publications/MouseKidenyOB/splicing/GE_Lean_6w_vs_GE_Obese_6w/SE/569_Mark2_chr19_7279986_7280012_-@chr19_7279111_7279278_-@chr19_7278042_7278086_-.pdf	Online figure
ENSMUSG00000024969.14	Mark2	3.79805e-05	0.000805382	0	1	-1	chr19	-	SE	exonStart_0base 7279985 exonEnd 7280012 upstreamES 7278041 upstreamEE 7278086 downstreamES 7280997 downstreamEE 7281255	https://betsholtzlab.org/Publications/MouseKidenyOB/splicing/GE_Lean_6w_vs_GE_Obese_6w/SE/570_Mark2_chr19_7280998_7281255_-@chr19_7279986_7280012_-@chr19_7278042_7278086_-.pdf	Online figure
ENSMUSG00000044367.7	Slc16a13	2.87341e-05	0.000700514	1	0.446	0.554	chr11	-	SE	exonStart_0base 70220194 exonEnd 70220338 upstreamES 70218592 upstreamEE 70219330 downstreamES 70220478 downstreamEE 70220994	https://betsholtzlab.org/Publications/MouseKidenyOB/splicing/GE_Lean_6w_vs_GE_Obese_6w/SE/571_Slc16a13_chr11_70220479_70220994_-@chr11_70220195_70220338_-@chr11_70218593_70219330_-.pdf	Online figure
ENSMUSG00000010608.14	Rbm25	1.94829e-05	0.000550177	0.407	1	-0.593	chr12	+	SE	exonStart_0base 83639127 exonEnd 83639191 upstreamES 83632256 upstreamEE 83632417 downstreamES 83642401 downstreamEE 83642519	https://betsholtzlab.org/Publications/MouseKidenyOB/splicing/GE_Lean_6w_vs_GE_Obese_6w/SE/572_Rbm25_chr12_83632257_83632417_+@chr12_83639128_83639191_+@chr12_83642402_83642519_+.pdf	Online figure
ENSMUSG00000010608.14	Rbm25	1.06227e-05	0.000389207	0.306	1	-0.694	chr12	+	SE	exonStart_0base 83639127 exonEnd 83639375 upstreamES 83632305 upstreamEE 83632417 downstreamES 83642401 downstreamEE 83642519	https://betsholtzlab.org/Publications/MouseKidenyOB/splicing/GE_Lean_6w_vs_GE_Obese_6w/SE/573_Rbm25_chr12_83632306_83632417_+@chr12_83639128_83639375_+@chr12_83642402_83642519_+.pdf	Online figure
ENSMUSG00000006705.11	Pknox1	0.00209261	0.0152956	0.853	0.249	0.604	chr17	+	SE	exonStart_0base 31581803 exonEnd 31582050 upstreamES 31564748 upstreamEE 31564888 downstreamES 31583695 downstreamEE 31583803	https://betsholtzlab.org/Publications/MouseKidenyOB/splicing/GE_Lean_6w_vs_GE_Obese_6w/SE/574_Pknox1_chr17_31564749_31564888_+@chr17_31581804_31582050_+@chr17_31583696_31583803_+.pdf	Online figure
ENSMUSG00000039233.11	Tbce	0.000320154	0.00389364	0.569	1	-0.431	chr13	-	SE	exonStart_0base 14003532 exonEnd 14003696 upstreamES 14001109 upstreamEE 14001178 downstreamES 14005142 downstreamEE 14005283	https://betsholtzlab.org/Publications/MouseKidenyOB/splicing/GE_Lean_6w_vs_GE_Obese_6w/SE/575_Tbce_chr13_14005143_14005283_-@chr13_14003533_14003696_-@chr13_14001110_14001178_-.pdf	Online figure
ENSMUSG00000041481.15	Serpina3g	0.000454028	0.00506737	0.231	0.747	-0.516	chr12	+	SE	exonStart_0base 104237194 exonEnd 104237286 upstreamES 104236244 upstreamEE 104236318 downstreamES 104237734 downstreamEE 104238323	https://betsholtzlab.org/Publications/MouseKidenyOB/splicing/GE_Lean_6w_vs_GE_Obese_6w/SE/576_Serpina3g_chr12_104236245_104236318_+@chr12_104237195_104237286_+@chr12_104237735_104238323_+.pdf	Online figure
ENSMUSG00000041481.15	Serpina3g	0.000194771	0.00268866	0.498	1	-0.502	chr12	+	SE	exonStart_0base 104237194 exonEnd 104237286 upstreamES 104236244 upstreamEE 104236318 downstreamES 104237937 downstreamEE 104238344	https://betsholtzlab.org/Publications/MouseKidenyOB/splicing/GE_Lean_6w_vs_GE_Obese_6w/SE/577_Serpina3g_chr12_104236245_104236318_+@chr12_104237195_104237286_+@chr12_104237938_104238344_+.pdf	Online figure
ENSMUSG00000032594.10	Ip6k1	0.00180463	0.0137642	1	0.494	0.506	chr9	+	SE	exonStart_0base 108045245 exonEnd 108045313 upstreamES 108044724 upstreamEE 108044900 downstreamES 108045462 downstreamEE 108046143	https://betsholtzlab.org/Publications/MouseKidenyOB/splicing/GE_Lean_6w_vs_GE_Obese_6w/SE/578_Ip6k1_chr9_108044725_108044900_+@chr9_108045246_108045313_+@chr9_108045463_108046143_+.pdf	Online figure
ENSMUSG00000075284.9	Wipf1	1.69212e-05	0.000509034	1	0	1	chr2	-	SE	exonStart_0base 73488874 exonEnd 73489166 upstreamES 73447931 upstreamEE 73447937 downstreamES 73529326 downstreamEE 73529382	https://betsholtzlab.org/Publications/MouseKidenyOB/splicing/GE_Lean_6w_vs_GE_Obese_6w/SE/579_Wipf1_chr2_73529327_73529382_-@chr2_73488875_73489166_-@chr2_73447932_73447937_-.pdf	Online figure
ENSMUSG00000020385.15	Clk4	1.15869e-05	0.000410039	0	1	-1	chr11	+	SE	exonStart_0base 51268768 exonEnd 51268846 upstreamES 51268164 upstreamEE 51268231 downstreamES 51270536 downstreamEE 51270595	https://betsholtzlab.org/Publications/MouseKidenyOB/splicing/GE_Lean_6w_vs_GE_Obese_6w/SE/580_Clk4_chr11_51268165_51268231_+@chr11_51268769_51268846_+@chr11_51270537_51270595_+.pdf	Online figure
ENSMUSG00000034194.15	R3hcc1	0.00149666	0.0119177	0.356	1	-0.644	chr14	-	SE	exonStart_0base 69707053 exonEnd 69707181 upstreamES 69706546 upstreamEE 69706684 downstreamES 69707505 downstreamEE 69707580	https://betsholtzlab.org/Publications/MouseKidenyOB/splicing/GE_Lean_6w_vs_GE_Obese_6w/SE/581_R3hcc1_chr14_69707506_69707580_-@chr14_69707054_69707181_-@chr14_69706547_69706684_-.pdf	Online figure
ENSMUSG00000033499.12	Larp4b	0.0047571	0.0285082	1	0.514	0.486	chr13	+	SE	exonStart_0base 9158550 exonEnd 9158802 upstreamES 9158122 upstreamEE 9158229 downstreamES 9164674 downstreamEE 9164720	https://betsholtzlab.org/Publications/MouseKidenyOB/splicing/GE_Lean_6w_vs_GE_Obese_6w/SE/582_Larp4b_chr13_9158123_9158229_+@chr13_9158551_9158802_+@chr13_9164675_9164720_+.pdf	Online figure
ENSMUSG00000028898.14	Trnau1ap	4.57117e-07	5.75272e-05	0.525	1	-0.475	chr4	-	SE	exonStart_0base 132328468 exonEnd 132328566 upstreamES 132325207 upstreamEE 132325260 downstreamES 132329352 downstreamEE 132329389	https://betsholtzlab.org/Publications/MouseKidenyOB/splicing/GE_Lean_6w_vs_GE_Obese_6w/SE/583_Trnau1ap_chr4_132329353_132329389_-@chr4_132328469_132328566_-@chr4_132325208_132325260_-.pdf	Online figure
ENSMUSG00000039219.16	Arid4b	4.42757e-13	8.54373e-10	0	1	-1	chr13	+	SE	exonStart_0base 14169918 exonEnd 14170179 upstreamES 14164766 upstreamEE 14164942 downstreamES 14181219 downstreamEE 14181304	https://betsholtzlab.org/Publications/MouseKidenyOB/splicing/GE_Lean_6w_vs_GE_Obese_6w/SE/584_Arid4b_chr13_14164767_14164942_+@chr13_14169919_14170179_+@chr13_14181220_14181304_+.pdf	Online figure
ENSMUSG00000045205.15	Dpy19l4	0.00349709	0.022798	1	0.48	0.52	chr4	-	SE	exonStart_0base 11277928 exonEnd 11277985 upstreamES 11276863 upstreamEE 11276946 downstreamES 11281003 downstreamEE 11281124	https://betsholtzlab.org/Publications/MouseKidenyOB/splicing/GE_Lean_6w_vs_GE_Obese_6w/SE/585_Dpy19l4_chr4_11281004_11281124_-@chr4_11277929_11277985_-@chr4_11276864_11276946_-.pdf	Online figure
ENSMUSG00000021686.4	Ap3b1	0.000191114	0.00267236	0.295	1	-0.705	chr13	+	SE	exonStart_0base 94501917 exonEnd 94502024 upstreamES 94493668 upstreamEE 94493741 downstreamES 94528164 downstreamEE 94528396	https://betsholtzlab.org/Publications/MouseKidenyOB/splicing/GE_Lean_6w_vs_GE_Obese_6w/SE/586_Ap3b1_chr13_94493669_94493741_+@chr13_94501918_94502024_+@chr13_94528165_94528396_+.pdf	Online figure
ENSMUSG00000090386.8	Mir99ahg	0.00214891	0.0156282	0.176	1	-0.824	chr16	+	SE	exonStart_0base 77594621 exonEnd 77595262 upstreamES 77555921 upstreamEE 77555967 downstreamES 77596898 downstreamEE 77598531	https://betsholtzlab.org/Publications/MouseKidenyOB/splicing/GE_Lean_6w_vs_GE_Obese_6w/SE/587_Mir99ahg_chr16_77555922_77555967_+@chr16_77594622_77595262_+@chr16_77596899_77598531_+.pdf	Online figure
ENSMUSG00000047115.14	Fam221a	1.64716e-05	0.000507204	1	0	1	chr6	+	SE	exonStart_0base 49385372 exonEnd 49385455 upstreamES 49382962 upstreamEE 49383079 downstreamES 49388816 downstreamEE 49390539	https://betsholtzlab.org/Publications/MouseKidenyOB/splicing/GE_Lean_6w_vs_GE_Obese_6w/SE/588_Fam221a_chr6_49382963_49383079_+@chr6_49385373_49385455_+@chr6_49388817_49390539_+.pdf	Online figure
ENSMUSG00000021709.13	Erbb2ip	0.00047346	0.0052156	0.202	1	-0.798	chr13	-	SE	exonStart_0base 103830187 exonEnd 103830331 upstreamES 103827906 upstreamEE 103828023 downstreamES 103833497 downstreamEE 103835028	https://betsholtzlab.org/Publications/MouseKidenyOB/splicing/GE_Lean_6w_vs_GE_Obese_6w/SE/589_Erbb2ip_chr13_103833498_103835028_-@chr13_103830188_103830331_-@chr13_103827907_103828023_-.pdf	Online figure
ENSMUSG00000042590.15	Ipo11	0.00560789	0.0317964	1	0.441	0.559	chr13	-	SE	exonStart_0base 106889362 exonEnd 106889406 upstreamES 106886666 upstreamEE 106886757 downstreamES 106891615 downstreamEE 106891768	https://betsholtzlab.org/Publications/MouseKidenyOB/splicing/GE_Lean_6w_vs_GE_Obese_6w/SE/590_Ipo11_chr13_106891616_106891768_-@chr13_106889363_106889406_-@chr13_106886667_106886757_-.pdf	Online figure
ENSMUSG00000022201.14	Zfr	0.000478497	0.00524625	0.581	1	-0.419	chr15	+	SE	exonStart_0base 12170815 exonEnd 12170913 upstreamES 12166144 upstreamEE 12166286 downstreamES 12171758 downstreamEE 12171854	https://betsholtzlab.org/Publications/MouseKidenyOB/splicing/GE_Lean_6w_vs_GE_Obese_6w/SE/591_Zfr_chr15_12166145_12166286_+@chr15_12170816_12170913_+@chr15_12171759_12171854_+.pdf	Online figure
ENSMUSG00000021772.13	Nkiras1	0.00724888	0.0380572	0.294	0.824	-0.53	chr14	+	SE	exonStart_0base 18276695 exonEnd 18276730 upstreamES 18271263 upstreamEE 18271323 downstreamES 18276825 downstreamEE 18276968	https://betsholtzlab.org/Publications/MouseKidenyOB/splicing/GE_Lean_6w_vs_GE_Obese_6w/SE/592_Nkiras1_chr14_18271264_18271323_+@chr14_18276696_18276730_+@chr14_18276826_18276968_+.pdf	Online figure
ENSMUSG00000021772.13	Nkiras1	0.00570351	0.0321496	0.736	0.285	0.451	chr14	+	SE	exonStart_0base 18277843 exonEnd 18278101 upstreamES 18276695 upstreamEE 18276806 downstreamES 18278303 downstreamEE 18278545	https://betsholtzlab.org/Publications/MouseKidenyOB/splicing/GE_Lean_6w_vs_GE_Obese_6w/SE/593_Nkiras1_chr14_18276696_18276806_+@chr14_18277844_18278101_+@chr14_18278304_18278545_+.pdf	Online figure
ENSMUSG00000039599.14	Fam149b	5.77247e-07	6.30506e-05	0	1	-1	chr14	+	SE	exonStart_0base 20351311 exonEnd 20351416 upstreamES 20348161 upstreamEE 20348394 downstreamES 20352703 downstreamEE 20352839	https://betsholtzlab.org/Publications/MouseKidenyOB/splicing/GE_Lean_6w_vs_GE_Obese_6w/SE/594_Fam149b_chr14_20348162_20348394_+@chr14_20351312_20351416_+@chr14_20352704_20352839_+.pdf	Online figure
ENSMUSG00000021782.13	Dlg5	1.40144e-05	0.000460188	1	0	1	chr14	-	SE	exonStart_0base 24155140 exonEnd 24155253 upstreamES 24154599 upstreamEE 24154689 downstreamES 24156471 downstreamEE 24156616	https://betsholtzlab.org/Publications/MouseKidenyOB/splicing/GE_Lean_6w_vs_GE_Obese_6w/SE/595_Dlg5_chr14_24156472_24156616_-@chr14_24155141_24155253_-@chr14_24154600_24154689_-.pdf	Online figure
ENSMUSG00000040651.8	Fam208a	0.000605549	0.00623322	1	0.184	0.816	chr14	+	SE	exonStart_0base 27467505 exonEnd 27467565 upstreamES 27466166 upstreamEE 27466311 downstreamES 27471617 downstreamEE 27472546	https://betsholtzlab.org/Publications/MouseKidenyOB/splicing/GE_Lean_6w_vs_GE_Obese_6w/SE/596_Fam208a_chr14_27466167_27466311_+@chr14_27467506_27467565_+@chr14_27471618_27472546_+.pdf	Online figure
ENSMUSG00000042323.15	Pbrm1	0.00307312	0.0204958	1	0.594	0.406	chr14	+	SE	exonStart_0base 31045329 exonEnd 31045425 upstreamES 31044623 upstreamEE 31044709 downstreamES 31046331 downstreamEE 31046423	https://betsholtzlab.org/Publications/MouseKidenyOB/splicing/GE_Lean_6w_vs_GE_Obese_6w/SE/597_Pbrm1_chr14_31044624_31044709_+@chr14_31045330_31045425_+@chr14_31046332_31046423_+.pdf	Online figure
ENSMUSG00000037536.12	Fbxo34	0.0014537	0.0117044	0	0.609	-0.609	chr14	+	SE	exonStart_0base 47500793 exonEnd 47500870 upstreamES 47472560 upstreamEE 47472717 downstreamES 47526204 downstreamEE 47526314	https://betsholtzlab.org/Publications/MouseKidenyOB/splicing/GE_Lean_6w_vs_GE_Obese_6w/SE/598_Fbxo34_chr14_47472561_47472717_+@chr14_47500794_47500870_+@chr14_47526205_47526314_+.pdf	Online figure
ENSMUSG00000021843.15	Ktn1	0.000416521	0.00473721	1	0.419	0.581	chr14	+	SE	exonStart_0base 47716873 exonEnd 47716960 upstreamES 47714631 upstreamEE 47714722 downstreamES 47720195 downstreamEE 47720285	https://betsholtzlab.org/Publications/MouseKidenyOB/splicing/GE_Lean_6w_vs_GE_Obese_6w/SE/599_Ktn1_chr14_47714632_47714722_+@chr14_47716874_47716960_+@chr14_47720196_47720285_+.pdf	Online figure
ENSMUSG00000040701.14	Ap1g2	2.29268e-07	4.42412e-05	0.599	0	0.599	chr14	-	SE	exonStart_0base 55104581 exonEnd 55104658 upstreamES 55104362 upstreamEE 55104458 downstreamES 55104830 downstreamEE 55104927	https://betsholtzlab.org/Publications/MouseKidenyOB/splicing/GE_Lean_6w_vs_GE_Obese_6w/SE/600_Ap1g2_chr14_55104831_55104927_-@chr14_55104582_55104658_-@chr14_55104363_55104458_-.pdf	Online figure
ENSMUSG00000033487.13	Fndc3a	9.7815e-06	0.000367695	1	0	1	chr14	-	SE	exonStart_0base 72582956 exonEnd 72583015 upstreamES 72574522 upstreamEE 72574680 downstreamES 72584574 downstreamEE 72584844	https://betsholtzlab.org/Publications/MouseKidenyOB/splicing/GE_Lean_6w_vs_GE_Obese_6w/SE/601_Fndc3a_chr14_72584575_72584844_-@chr14_72582957_72583015_-@chr14_72574523_72574680_-.pdf	Online figure
ENSMUSG00000021998.15	Lcp1	0.000466826	0.00516722	0.364	1	-0.636	chr14	+	SE	exonStart_0base 75175256 exonEnd 75175321 upstreamES 75136474 upstreamEE 75136642 downstreamES 75176814 downstreamEE 75176933	https://betsholtzlab.org/Publications/MouseKidenyOB/splicing/GE_Lean_6w_vs_GE_Obese_6w/SE/602_Lcp1_chr14_75136475_75136642_+@chr14_75175257_75175321_+@chr14_75176815_75176933_+.pdf	Online figure
ENSMUSG00000045098.17	Suv420h1	0.00145133	0.0117044	1	0.53	0.47	chr19	+	SE	exonStart_0base 3807224 exonEnd 3807421 upstreamES 3804916 upstreamEE 3805053 downstreamES 3814114 downstreamEE 3816391	https://betsholtzlab.org/Publications/MouseKidenyOB/splicing/GE_Lean_6w_vs_GE_Obese_6w/SE/603_Suv420h1_chr19_3804917_3805053_+@chr19_3807225_3807421_+@chr19_3814115_3816391_+.pdf	Online figure
ENSMUSG00000033166.10	Dis3	0.000151991	0.00221075	1	0.32	0.68	chr14	-	SE	exonStart_0base 99097584 exonEnd 99097778 upstreamES 99096756 upstreamEE 99096830 downstreamES 99098682 downstreamEE 99098840	https://betsholtzlab.org/Publications/MouseKidenyOB/splicing/GE_Lean_6w_vs_GE_Obese_6w/SE/604_Dis3_chr14_99098683_99098840_-@chr14_99097585_99097778_-@chr14_99096757_99096830_-.pdf	Online figure
ENSMUSG00000022119.14	Rbm26	0.000162464	0.00233375	0.739	0	0.739	chr14	-	SE	exonStart_0base 105139090 exonEnd 105139162 upstreamES 105131881 upstreamEE 105132007 downstreamES 105140315 downstreamEE 105140438	https://betsholtzlab.org/Publications/MouseKidenyOB/splicing/GE_Lean_6w_vs_GE_Obese_6w/SE/605_Rbm26_chr14_105140316_105140438_-@chr14_105139091_105139162_-@chr14_105131882_105132007_-.pdf	Online figure
ENSMUSG00000022672.8	Prkdc	0.00108805	0.00945753	0.32	1	-0.68	chr16	+	SE	exonStart_0base 15684136 exonEnd 15684243 upstreamES 15678202 upstreamEE 15678362 downstreamES 15687358 downstreamEE 15687449	https://betsholtzlab.org/Publications/MouseKidenyOB/splicing/GE_Lean_6w_vs_GE_Obese_6w/SE/606_Prkdc_chr16_15678203_15678362_+@chr16_15684137_15684243_+@chr16_15687359_15687449_+.pdf	Online figure
ENSMUSG00000043940.13	Wdfy3	0.000533736	0.00572185	1	0.315	0.685	chr5	-	SE	exonStart_0base 101935989 exonEnd 101936073 upstreamES 101930827 upstreamEE 101931005 downstreamES 101937281 downstreamEE 101937739	https://betsholtzlab.org/Publications/MouseKidenyOB/splicing/GE_Lean_6w_vs_GE_Obese_6w/SE/607_Wdfy3_chr5_101937282_101937739_-@chr5_101935990_101936073_-@chr5_101930828_101931005_-.pdf	Online figure
ENSMUSG00000098950.6	Gm28036	0.000742268	0.0071736	0.452	0.907	-0.455	chr2	-	SE	exonStart_0base 156096417 exonEnd 156098372 upstreamES 156079338 upstreamEE 156079464 downstreamES 156103348 downstreamEE 156103397	https://betsholtzlab.org/Publications/MouseKidenyOB/splicing/GE_Lean_6w_vs_GE_Obese_6w/SE/608_Gm28036_chr2_156103349_156103397_-@chr2_156096418_156098372_-@chr2_156079339_156079464_-.pdf	Online figure
ENSMUSG00000098950.6	Gm28036	0.00634738	0.0345673	0.473	0.879	-0.406	chr2	-	SE	exonStart_0base 156098184 exonEnd 156098372 upstreamES 156079338 upstreamEE 156079464 downstreamES 156103348 downstreamEE 156103429	https://betsholtzlab.org/Publications/MouseKidenyOB/splicing/GE_Lean_6w_vs_GE_Obese_6w/SE/609_Gm28036_chr2_156103349_156103429_-@chr2_156098185_156098372_-@chr2_156079339_156079464_-.pdf	Online figure
ENSMUSG00000027166.13	Dnajc24	5.68702e-07	6.30506e-05	1	0	1	chr2	-	SE	exonStart_0base 105973921 exonEnd 105974082 upstreamES 105970438 upstreamEE 105970516 downstreamES 105980981 downstreamEE 105981120	https://betsholtzlab.org/Publications/MouseKidenyOB/splicing/GE_Lean_6w_vs_GE_Obese_6w/SE/610_Dnajc24_chr2_105980982_105981120_-@chr2_105973922_105974082_-@chr2_105970439_105970516_-.pdf	Online figure
ENSMUSG00000041225.15	Arhgap12	0.000861629	0.00800637	1	0.223	0.777	chr18	-	SE	exonStart_0base 6056978 exonEnd 6056993 upstreamES 6052861 upstreamEE 6052923 downstreamES 6057516 downstreamEE 6057591	https://betsholtzlab.org/Publications/MouseKidenyOB/splicing/GE_Lean_6w_vs_GE_Obese_6w/SE/611_Arhgap12_chr18_6057517_6057591_-@chr18_6056979_6056993_-@chr18_6052862_6052923_-.pdf	Online figure
ENSMUSG00000041225.15	Arhgap12	0.00811853	0.041053	0.795	0.301	0.494	chr18	-	SE	exonStart_0base 6065704 exonEnd 6065845 upstreamES 6064340 upstreamEE 6064421 downstreamES 6069830 downstreamEE 6070091	https://betsholtzlab.org/Publications/MouseKidenyOB/splicing/GE_Lean_6w_vs_GE_Obese_6w/SE/612_Arhgap12_chr18_6069831_6070091_-@chr18_6065705_6065845_-@chr18_6064341_6064421_-.pdf	Online figure
ENSMUSG00000037646.9	Vps13b	0.0001035	0.00165515	1	0.22	0.78	chr15	+	SE	exonStart_0base 35839874 exonEnd 35840056 upstreamES 35834183 upstreamEE 35834380 downstreamES 35841248 downstreamEE 35841598	https://betsholtzlab.org/Publications/MouseKidenyOB/splicing/GE_Lean_6w_vs_GE_Obese_6w/SE/613_Vps13b_chr15_35834184_35834380_+@chr15_35839875_35840056_+@chr15_35841249_35841598_+.pdf	Online figure
ENSMUSG00000022526.7	Zfp251	9.27725e-06	0.000364355	1	0	1	chr15	-	SE	exonStart_0base 76870281 exonEnd 76870414 upstreamES 76869806 upstreamEE 76869920 downstreamES 76870652 downstreamEE 76871435	https://betsholtzlab.org/Publications/MouseKidenyOB/splicing/GE_Lean_6w_vs_GE_Obese_6w/SE/614_Zfp251_chr15_76870653_76871435_-@chr15_76870282_76870414_-@chr15_76869807_76869920_-.pdf	Online figure
ENSMUSG00000018169.11	Mfng	0.00551222	0.0314622	0.241	1	-0.759	chr15	-	SE	exonStart_0base 78770694 exonEnd 78770799 upstreamES 78767141 upstreamEE 78767190 downstreamES 78771776 downstreamEE 78771894	https://betsholtzlab.org/Publications/MouseKidenyOB/splicing/GE_Lean_6w_vs_GE_Obese_6w/SE/615_Mfng_chr15_78771777_78771894_-@chr15_78770695_78770799_-@chr15_78767142_78767190_-.pdf	Online figure
ENSMUSG00000002105.14	Slc39a13	0.00363773	0.0235479	0.14	0.722	-0.582	chr2	-	SE	exonStart_0base 91064905 exonEnd 91065007 upstreamES 91064640 upstreamEE 91064804 downstreamES 91065581 downstreamEE 91065700	https://betsholtzlab.org/Publications/MouseKidenyOB/splicing/GE_Lean_6w_vs_GE_Obese_6w/SE/616_Slc39a13_chr2_91065582_91065700_-@chr2_91064906_91065007_-@chr2_91064641_91064804_-.pdf	Online figure
ENSMUSG00000002105.14	Slc39a13	7.33589e-05	0.00125984	0	1	-1	chr2	-	SE	exonStart_0base 91069628 exonEnd 91069653 upstreamES 91068430 upstreamEE 91068739 downstreamES 91070154 downstreamEE 91070187	https://betsholtzlab.org/Publications/MouseKidenyOB/splicing/GE_Lean_6w_vs_GE_Obese_6w/SE/617_Slc39a13_chr2_91070155_91070187_-@chr2_91069629_91069653_-@chr2_91068431_91068739_-.pdf	Online figure
ENSMUSG00000087331.7	1810021B22Rik	5.24933e-05	0.00099735	1	0	1	chr15	-	SE	exonStart_0base 89074072 exonEnd 89074198 upstreamES 89071570 upstreamEE 89071748 downstreamES 89075098 downstreamEE 89075149	https://betsholtzlab.org/Publications/MouseKidenyOB/splicing/GE_Lean_6w_vs_GE_Obese_6w/SE/618_1810021B22Rik_chr15_89075099_89075149_-@chr15_89074073_89074198_-@chr15_89071571_89071748_-.pdf	Online figure
ENSMUSG00000015377.9	Dennd6b	1.22143e-05	0.000420883	1	0	1	chr15	-	SE	exonStart_0base 89186753 exonEnd 89186819 upstreamES 89186362 upstreamEE 89186427 downstreamES 89186955 downstreamEE 89187050	https://betsholtzlab.org/Publications/MouseKidenyOB/splicing/GE_Lean_6w_vs_GE_Obese_6w/SE/619_Dennd6b_chr15_89186956_89187050_-@chr15_89186754_89186819_-@chr15_89186363_89186427_-.pdf	Online figure
ENSMUSG00000036273.14	Lrrk2	0.000620766	0.00633795	0.285	1	-0.715	chr15	+	SE	exonStart_0base 91685731 exonEnd 91685866 upstreamES 91683092 upstreamEE 91683181 downstreamES 91688827 downstreamEE 91688962	https://betsholtzlab.org/Publications/MouseKidenyOB/splicing/GE_Lean_6w_vs_GE_Obese_6w/SE/620_Lrrk2_chr15_91683093_91683181_+@chr15_91685732_91685866_+@chr15_91688828_91688962_+.pdf	Online figure
ENSMUSG00000023010.13	Tmbim6	5.03132e-05	0.000980684	0	1	-1	chr15	+	SE	exonStart_0base 99393694 exonEnd 99393730 upstreamES 99392985 upstreamEE 99393040 downstreamES 99401579 downstreamEE 99401663	https://betsholtzlab.org/Publications/MouseKidenyOB/splicing/GE_Lean_6w_vs_GE_Obese_6w/SE/621_Tmbim6_chr15_99392986_99393040_+@chr15_99393695_99393730_+@chr15_99401580_99401663_+.pdf	Online figure
ENSMUSG00000040213.12	Ccbl2	5.58772e-07	6.30506e-05	0	1	-1	chr3	+	SE	exonStart_0base 142706688 exonEnd 142706791 upstreamES 142701050 upstreamEE 142701175 downstreamES 142718375 downstreamEE 142718434	https://betsholtzlab.org/Publications/MouseKidenyOB/splicing/GE_Lean_6w_vs_GE_Obese_6w/SE/622_Ccbl2_chr3_142701051_142701175_+@chr3_142706689_142706791_+@chr3_142718376_142718434_+.pdf	Online figure
ENSMUSG00000040213.12	Ccbl2	5.22544e-07	6.17054e-05	0	1	-1	chr3	+	SE	exonStart_0base 142706688 exonEnd 142706795 upstreamES 142701079 upstreamEE 142701175 downstreamES 142718375 downstreamEE 142718434	https://betsholtzlab.org/Publications/MouseKidenyOB/splicing/GE_Lean_6w_vs_GE_Obese_6w/SE/623_Ccbl2_chr3_142701080_142701175_+@chr3_142706689_142706795_+@chr3_142718376_142718434_+.pdf	Online figure
ENSMUSG00000022710.16	Usp7	0.0014006	0.0114991	0.521	1	-0.479	chr16	-	SE	exonStart_0base 8693017 exonEnd 8693118 upstreamES 8692379 upstreamEE 8692479 downstreamES 8693701 downstreamEE 8693779	https://betsholtzlab.org/Publications/MouseKidenyOB/splicing/GE_Lean_6w_vs_GE_Obese_6w/SE/624_Usp7_chr16_8693702_8693779_-@chr16_8693018_8693118_-@chr16_8692380_8692479_-.pdf	Online figure
ENSMUSG00000022682.7	Rrn3	3.19901e-06	0.000194937	0.234	1	-0.766	chr16	+	SE	exonStart_0base 13804948 exonEnd 13805079 upstreamES 13799885 upstreamEE 13800016 downstreamES 13806558 downstreamEE 13806743	https://betsholtzlab.org/Publications/MouseKidenyOB/splicing/GE_Lean_6w_vs_GE_Obese_6w/SE/625_Rrn3_chr16_13799886_13800016_+@chr16_13804949_13805079_+@chr16_13806559_13806743_+.pdf	Online figure
ENSMUSG00000022750.16	Klhl22	0.00112644	0.00971829	1	0.485	0.515	chr16	+	SE	exonStart_0base 17776401 exonEnd 17777120 upstreamES 17771703 upstreamEE 17771869 downstreamES 17784202 downstreamEE 17784395	https://betsholtzlab.org/Publications/MouseKidenyOB/splicing/GE_Lean_6w_vs_GE_Obese_6w/SE/626_Klhl22_chr16_17771704_17771869_+@chr16_17776402_17777120_+@chr16_17784203_17784395_+.pdf	Online figure
ENSMUSG00000000884.15	Gnb1l	1.43432e-05	0.000460188	0	1	-1	chr16	+	SE	exonStart_0base 18545116 exonEnd 18545213 upstreamES 18544110 upstreamEE 18544273 downstreamES 18548092 downstreamEE 18548191	https://betsholtzlab.org/Publications/MouseKidenyOB/splicing/GE_Lean_6w_vs_GE_Obese_6w/SE/627_Gnb1l_chr16_18544111_18544273_+@chr16_18545117_18545213_+@chr16_18548093_18548191_+.pdf	Online figure
ENSMUSG00000033809.13	Alg3	5.65202e-05	0.00105889	0.597	1	-0.403	chr16	-	SE	exonStart_0base 20608986 exonEnd 20609086 upstreamES 20608741 upstreamEE 20608889 downstreamES 20610542 downstreamEE 20610768	https://betsholtzlab.org/Publications/MouseKidenyOB/splicing/GE_Lean_6w_vs_GE_Obese_6w/SE/628_Alg3_chr16_20610543_20610768_-@chr16_20608987_20609086_-@chr16_20608742_20608889_-.pdf	Online figure
ENSMUSG00000097290.6	1300002E11Rik	2.09835e-05	0.000577422	1	0	1	chr16	+	SE	exonStart_0base 21800774 exonEnd 21800836 upstreamES 21795849 upstreamEE 21795975 downstreamES 21801280 downstreamEE 21801356	https://betsholtzlab.org/Publications/MouseKidenyOB/splicing/GE_Lean_6w_vs_GE_Obese_6w/SE/629_1300002E11Rik_chr16_21795850_21795975_+@chr16_21800775_21800836_+@chr16_21801281_21801356_+.pdf	Online figure
ENSMUSG00000097290.6	1300002E11Rik	7.53756e-06	0.000320845	0.038	0.779	-0.741	chr16	+	SE	exonStart_0base 21801280 exonEnd 21801356 upstreamES 21795849 upstreamEE 21795975 downstreamES 21808677 downstreamEE 21809037	https://betsholtzlab.org/Publications/MouseKidenyOB/splicing/GE_Lean_6w_vs_GE_Obese_6w/SE/630_1300002E11Rik_chr16_21795850_21795975_+@chr16_21801281_21801356_+@chr16_21808678_21809037_+.pdf	Online figure
ENSMUSG00000033581.15	Igf2bp2	4.11814e-05	0.000860646	1	0.091	0.909	chr16	-	SE	exonStart_0base 22063581 exonEnd 22065167 upstreamES 22061859 upstreamEE 22061973 downstreamES 22068142 downstreamEE 22068259	https://betsholtzlab.org/Publications/MouseKidenyOB/splicing/GE_Lean_6w_vs_GE_Obese_6w/SE/631_Igf2bp2_chr16_22068143_22068259_-@chr16_22063582_22065167_-@chr16_22061860_22061973_-.pdf	Online figure
ENSMUSG00000025145.12	Lrrc45	6.37581e-05	0.00114626	0.467	1	-0.533	chr11	+	SE	exonStart_0base 120718649 exonEnd 120718720 upstreamES 120718441 upstreamEE 120718553 downstreamES 120719039 downstreamEE 120719132	https://betsholtzlab.org/Publications/MouseKidenyOB/splicing/GE_Lean_6w_vs_GE_Obese_6w/SE/632_Lrrc45_chr11_120718442_120718553_+@chr11_120718650_120718720_+@chr11_120719040_120719132_+.pdf	Online figure
ENSMUSG00000025145.12	Lrrc45	0.00597459	0.0332566	0.509	1	-0.491	chr11	+	SE	exonStart_0base 120719039 exonEnd 120719132 upstreamES 120718649 upstreamEE 120718720 downstreamES 120719465 downstreamEE 120719558	https://betsholtzlab.org/Publications/MouseKidenyOB/splicing/GE_Lean_6w_vs_GE_Obese_6w/SE/633_Lrrc45_chr11_120718650_120718720_+@chr11_120719040_120719132_+@chr11_120719466_120719558_+.pdf	Online figure
ENSMUSG00000079179.8	Rab10os	0.00544396	0.0311414	1	0.521	0.479	chr12	+	SE	exonStart_0base 3238833 exonEnd 3239009 upstreamES 3238028 upstreamEE 3238112 downstreamES 3241521 downstreamEE 3241578	https://betsholtzlab.org/Publications/MouseKidenyOB/splicing/GE_Lean_6w_vs_GE_Obese_6w/SE/634_Rab10os_chr12_3238029_3238112_+@chr12_3238834_3239009_+@chr12_3241522_3241578_+.pdf	Online figure
ENSMUSG00000038084.15	Opa1	0.00394676	0.0249703	0.322	0.89	-0.568	chr16	+	SE	exonStart_0base 29588822 exonEnd 29588876 upstreamES 29588251 upstreamEE 29588359 downstreamES 29589680 downstreamEE 29589748	https://betsholtzlab.org/Publications/MouseKidenyOB/splicing/GE_Lean_6w_vs_GE_Obese_6w/SE/635_Opa1_chr16_29588252_29588359_+@chr16_29588823_29588876_+@chr16_29589681_29589748_+.pdf	Online figure
ENSMUSG00000038084.15	Opa1	0.00718379	0.0378063	0.084	0.517	-0.433	chr16	+	SE	exonStart_0base 29597585 exonEnd 29597696 upstreamES 29589680 upstreamEE 29589748 downstreamES 29602211 downstreamEE 29602265	https://betsholtzlab.org/Publications/MouseKidenyOB/splicing/GE_Lean_6w_vs_GE_Obese_6w/SE/636_Opa1_chr16_29589681_29589748_+@chr16_29597586_29597696_+@chr16_29602212_29602265_+.pdf	Online figure
ENSMUSG00000022801.12	Lrch3	1.67043e-05	0.0005074	0.517	0	0.517	chr16	+	SE	exonStart_0base 33009188 exonEnd 33009436 upstreamES 33005663 upstreamEE 33005741 downstreamES 33012340 downstreamEE 33012699	https://betsholtzlab.org/Publications/MouseKidenyOB/splicing/GE_Lean_6w_vs_GE_Obese_6w/SE/637_Lrch3_chr16_33005664_33005741_+@chr16_33009189_33009436_+@chr16_33012341_33012699_+.pdf	Online figure
ENSMUSG00000022701.16	2610015P09Rik	1.80124e-05	0.000521369	0	1	-1	chr16	+	SE	exonStart_0base 43892152 exonEnd 43892191 upstreamES 43889799 upstreamEE 43890038 downstreamES 43898089 downstreamEE 43898231	https://betsholtzlab.org/Publications/MouseKidenyOB/splicing/GE_Lean_6w_vs_GE_Obese_6w/SE/638_2610015P09Rik_chr16_43889800_43890038_+@chr16_43892153_43892191_+@chr16_43898090_43898231_+.pdf	Online figure
ENSMUSG00000022641.14	Bbx	6.89821e-06	0.000303356	1	0	1	chr16	-	SE	exonStart_0base 50210444 exonEnd 50210534 upstreamES 50209084 upstreamEE 50209144 downstreamES 50220444 downstreamEE 50220593	https://betsholtzlab.org/Publications/MouseKidenyOB/splicing/GE_Lean_6w_vs_GE_Obese_6w/SE/639_Bbx_chr16_50220445_50220593_-@chr16_50210445_50210534_-@chr16_50209085_50209144_-.pdf	Online figure
ENSMUSG00000052917.13	Senp7	0.00822568	0.0414074	1	0.531	0.469	chr16	+	SE	exonStart_0base 56089383 exonEnd 56089464 upstreamES 56082355 upstreamEE 56082408 downstreamES 56097339 downstreamEE 56097431	https://betsholtzlab.org/Publications/MouseKidenyOB/splicing/GE_Lean_6w_vs_GE_Obese_6w/SE/640_Senp7_chr16_56082356_56082408_+@chr16_56089384_56089464_+@chr16_56097340_56097431_+.pdf	Online figure
ENSMUSG00000073468.10	Sft2d1	6.22185e-05	0.00112557	0.502	1	-0.498	chr17	+	SE	exonStart_0base 8321799 exonEnd 8321835 upstreamES 8320547 upstreamEE 8320681 downstreamES 8323276 downstreamEE 8323335	https://betsholtzlab.org/Publications/MouseKidenyOB/splicing/GE_Lean_6w_vs_GE_Obese_6w/SE/641_Sft2d1_chr17_8320548_8320681_+@chr17_8321800_8321835_+@chr17_8323277_8323335_+.pdf	Online figure
ENSMUSG00000071415.6	Rpl23	4.17455e-06	0.000223764	1	0	1	chr11	-	SE	exonStart_0base 97781805 exonEnd 97782041 upstreamES 97781403 upstreamEE 97781462 downstreamES 97782343 downstreamEE 97782382	https://betsholtzlab.org/Publications/MouseKidenyOB/splicing/GE_Lean_6w_vs_GE_Obese_6w/SE/642_Rpl23_chr11_97782344_97782382_-@chr11_97781806_97782041_-@chr11_97781404_97781462_-.pdf	Online figure
ENSMUSG00000029207.15	Apbb2	0.0013111	0.0109682	0.129	0.56	-0.431	chr5	-	SE	exonStart_0base 66323601 exonEnd 66323607 upstreamES 66313314 upstreamEE 66313429 downstreamES 66362717 downstreamEE 66362845	https://betsholtzlab.org/Publications/MouseKidenyOB/splicing/GE_Lean_6w_vs_GE_Obese_6w/SE/643_Apbb2_chr5_66362718_66362845_-@chr5_66323602_66323607_-@chr5_66313315_66313429_-.pdf	Online figure
ENSMUSG00000050312.10	Nsun3	0.0075086	0.0389143	1	0.529	0.471	chr16	-	SE	exonStart_0base 62776287 exonEnd 62776631 upstreamES 62770657 upstreamEE 62770812 downstreamES 62785787 downstreamEE 62785897	https://betsholtzlab.org/Publications/MouseKidenyOB/splicing/GE_Lean_6w_vs_GE_Obese_6w/SE/644_Nsun3_chr16_62785788_62785897_-@chr16_62776288_62776631_-@chr16_62770658_62770812_-.pdf	Online figure
ENSMUSG00000023826.13	Park2	1.76299e-06	0.000129602	1	0	1	chr17	+	SE	exonStart_0base 11237461 exonEnd 11237702 upstreamES 11067124 upstreamEE 11067292 downstreamES 11303589 downstreamEE 11303711	https://betsholtzlab.org/Publications/MouseKidenyOB/splicing/GE_Lean_6w_vs_GE_Obese_6w/SE/645_Park2_chr17_11067125_11067292_+@chr17_11237462_11237702_+@chr17_11303590_11303711_+.pdf	Online figure
ENSMUSG00000039929.13	Urb1	6.4119e-06	0.000285527	1	0	1	chr16	-	SE	exonStart_0base 90776124 exonEnd 90776304 upstreamES 90774048 upstreamEE 90774901 downstreamES 90777353 downstreamEE 90777572	https://betsholtzlab.org/Publications/MouseKidenyOB/splicing/GE_Lean_6w_vs_GE_Obese_6w/SE/646_Urb1_chr16_90777354_90777572_-@chr16_90776125_90776304_-@chr16_90774049_90774901_-.pdf	Online figure
ENSMUSG00000014039.16	Prdm15	0.000529011	0.00568491	0	0.722	-0.722	chr16	-	SE	exonStart_0base 97829610 exonEnd 97829712 upstreamES 97821767 upstreamEE 97822010 downstreamES 97835577 downstreamEE 97835830	https://betsholtzlab.org/Publications/MouseKidenyOB/splicing/GE_Lean_6w_vs_GE_Obese_6w/SE/647_Prdm15_chr16_97835578_97835830_-@chr16_97829611_97829712_-@chr16_97821768_97822010_-.pdf	Online figure
ENSMUSG00000028717.11	Tal1	0.00217585	0.015745	0.465	1	-0.535	chr4	+	SE	exonStart_0base 115059518 exonEnd 115059666 upstreamES 115057437 upstreamEE 115057531 downstreamES 115063129 downstreamEE 115063570	https://betsholtzlab.org/Publications/MouseKidenyOB/splicing/GE_Lean_6w_vs_GE_Obese_6w/SE/648_Tal1_chr4_115057438_115057531_+@chr4_115059519_115059666_+@chr4_115063130_115063570_+.pdf	Online figure
ENSMUSG00000034377.9	Tulp4	1.48078e-05	0.000468428	1	0.168	0.832	chr17	+	SE	exonStart_0base 6121827 exonEnd 6122344 upstreamES 6107399 upstreamEE 6107788 downstreamES 6137210 downstreamEE 6138792	https://betsholtzlab.org/Publications/MouseKidenyOB/splicing/GE_Lean_6w_vs_GE_Obese_6w/SE/649_Tulp4_chr17_6107400_6107788_+@chr17_6121828_6122344_+@chr17_6137211_6138792_+.pdf	Online figure
ENSMUSG00000078247.3	Airn	0.000240754	0.00311796	0	0.619	-0.619	chr17	+	SE	exonStart_0base 12779289 exonEnd 12779512 upstreamES 12741384 upstreamEE 12741424 downstreamES 12814495 downstreamEE 12814717	https://betsholtzlab.org/Publications/MouseKidenyOB/splicing/GE_Lean_6w_vs_GE_Obese_6w/SE/650_Airn_chr17_12741385_12741424_+@chr17_12779290_12779512_+@chr17_12814496_12814717_+.pdf	Online figure
ENSMUSG00000078247.3	Airn	4.35885e-05	0.000882285	1	0	1	chr17	+	SE	exonStart_0base 12798358 exonEnd 12798439 upstreamES 12741397 upstreamEE 12741424 downstreamES 12829824 downstreamEE 12830151	https://betsholtzlab.org/Publications/MouseKidenyOB/splicing/GE_Lean_6w_vs_GE_Obese_6w/SE/651_Airn_chr17_12741398_12741424_+@chr17_12798359_12798439_+@chr17_12829825_12830151_+.pdf	Online figure
ENSMUSG00000096974.1	Gm26881	1.00977e-06	8.88903e-05	0	1	-1	chr4	+	SE	exonStart_0base 43052944 exonEnd 43053051 upstreamES 43051236 upstreamEE 43051377 downstreamES 43053153 downstreamEE 43053253	https://betsholtzlab.org/Publications/MouseKidenyOB/splicing/GE_Lean_6w_vs_GE_Obese_6w/SE/652_Gm26881_chr4_43051237_43051377_+@chr4_43052945_43053051_+@chr4_43053154_43053253_+.pdf	Online figure
ENSMUSG00000041429.2	Nthl1	0.00056749	0.00596419	1	0.591	0.409	chr17	+	SE	exonStart_0base 24634724 exonEnd 24634895 upstreamES 24633926 upstreamEE 24634165 downstreamES 24635587 downstreamEE 24635747	https://betsholtzlab.org/Publications/MouseKidenyOB/splicing/GE_Lean_6w_vs_GE_Obese_6w/SE/653_Nthl1_chr17_24633927_24634165_+@chr17_24634725_24634895_+@chr17_24635588_24635747_+.pdf	Online figure
ENSMUSG00000038534.16	Osbpl7	0.00553503	0.0315067	1	0.544	0.456	chr11	+	SE	exonStart_0base 97056252 exonEnd 97056347 upstreamES 97056030 upstreamEE 97056163 downstreamES 97056527 downstreamEE 97056623	https://betsholtzlab.org/Publications/MouseKidenyOB/splicing/GE_Lean_6w_vs_GE_Obese_6w/SE/654_Osbpl7_chr11_97056031_97056163_+@chr11_97056253_97056347_+@chr11_97056528_97056623_+.pdf	Online figure
ENSMUSG00000024050.14	Wiz	2.4011e-06	0.00016535	1	0	1	chr17	-	SE	exonStart_0base 32388603 exonEnd 32388755 upstreamES 32387572 upstreamEE 32387817 downstreamES 32389259 downstreamEE 32389376	https://betsholtzlab.org/Publications/MouseKidenyOB/splicing/GE_Lean_6w_vs_GE_Obese_6w/SE/655_Wiz_chr17_32389260_32389376_-@chr17_32388604_32388755_-@chr17_32387573_32387817_-.pdf	Online figure
ENSMUSG00000053390.14	Zfp952	0.00266447	0.0183845	1	0.381	0.619	chr17	+	SE	exonStart_0base 33002522 exonEnd 33002632 upstreamES 33001957 upstreamEE 33002018 downstreamES 33002757 downstreamEE 33005457	https://betsholtzlab.org/Publications/MouseKidenyOB/splicing/GE_Lean_6w_vs_GE_Obese_6w/SE/656_Zfp952_chr17_33001958_33002018_+@chr17_33002523_33002632_+@chr17_33002758_33005457_+.pdf	Online figure
ENSMUSG00000008435.14	Rdh13	0.000206711	0.00280246	0.276	1	-0.724	chr7	-	SE	exonStart_0base 4434993 exonEnd 4435098 upstreamES 4431421 upstreamEE 4431634 downstreamES 4442593 downstreamEE 4442749	https://betsholtzlab.org/Publications/MouseKidenyOB/splicing/GE_Lean_6w_vs_GE_Obese_6w/SE/657_Rdh13_chr7_4442594_4442749_-@chr7_4434994_4435098_-@chr7_4431422_4431634_-.pdf	Online figure
ENSMUSG00000008435.14	Rdh13	0.0039603	0.0249741	0.503	0	0.503	chr7	-	SE	exonStart_0base 4444977 exonEnd 4445122 upstreamES 4444202 upstreamEE 4444321 downstreamES 4445446 downstreamEE 4445642	https://betsholtzlab.org/Publications/MouseKidenyOB/splicing/GE_Lean_6w_vs_GE_Obese_6w/SE/658_Rdh13_chr7_4445447_4445642_-@chr7_4444978_4445122_-@chr7_4444203_4444321_-.pdf	Online figure
ENSMUSG00000024436.15	Mrps18b	0.000157551	0.00228016	0.297	1	-0.703	chr17	-	SE	exonStart_0base 35912337 exonEnd 35912404 upstreamES 35911418 upstreamEE 35911478 downstreamES 35914333 downstreamEE 35914402	https://betsholtzlab.org/Publications/MouseKidenyOB/splicing/GE_Lean_6w_vs_GE_Obese_6w/SE/659_Mrps18b_chr17_35914334_35914402_-@chr17_35912338_35912404_-@chr17_35911419_35911478_-.pdf	Online figure
ENSMUSG00000017307.14	Acot8	0.000806458	0.00759559	0.861	0.42	0.441	chr2	-	SE	exonStart_0base 164802996 exonEnd 164803133 upstreamES 164799557 upstreamEE 164799945 downstreamES 164804689 downstreamEE 164804822	https://betsholtzlab.org/Publications/MouseKidenyOB/splicing/GE_Lean_6w_vs_GE_Obese_6w/SE/660_Acot8_chr2_164804690_164804822_-@chr2_164802997_164803133_-@chr2_164799558_164799945_-.pdf	Online figure
ENSMUSG00000034729.15	Mrps10	0.006323	0.0344994	1	0.507	0.493	chr17	+	SE	exonStart_0base 47372575 exonEnd 47372645 upstreamES 47372426 upstreamEE 47372491 downstreamES 47374972 downstreamEE 47375109	https://betsholtzlab.org/Publications/MouseKidenyOB/splicing/GE_Lean_6w_vs_GE_Obese_6w/SE/661_Mrps10_chr17_47372427_47372491_+@chr17_47372576_47372645_+@chr17_47374973_47375109_+.pdf	Online figure
ENSMUSG00000010592.8	Dazl	1.37547e-05	0.000460188	0	1	-1	chr17	-	SE	exonStart_0base 50284995 exonEnd 50285046 upstreamES 50284237 upstreamEE 50284351 downstreamES 50286250 downstreamEE 50286322	https://betsholtzlab.org/Publications/MouseKidenyOB/splicing/GE_Lean_6w_vs_GE_Obese_6w/SE/662_Dazl_chr17_50286251_50286322_-@chr17_50284996_50285046_-@chr17_50284238_50284351_-.pdf	Online figure
ENSMUSG00000024083.14	Pja2	2.8162e-05	0.000696708	0.327	0.78	-0.453	chr17	-	SE	exonStart_0base 64297723 exonEnd 64297909 upstreamES 64292838 upstreamEE 64293024 downstreamES 64308621 downstreamEE 64309666	https://betsholtzlab.org/Publications/MouseKidenyOB/splicing/GE_Lean_6w_vs_GE_Obese_6w/SE/663_Pja2_chr17_64308622_64309666_-@chr17_64297724_64297909_-@chr17_64292839_64293024_-.pdf	Online figure
ENSMUSG00000024150.10	Mcfd2	1.52604e-10	1.76685e-07	0	1	-1	chr17	-	SE	exonStart_0base 87264140 exonEnd 87264365 upstreamES 87257927 upstreamEE 87258089 downstreamES 87265791 downstreamEE 87265880	https://betsholtzlab.org/Publications/MouseKidenyOB/splicing/GE_Lean_6w_vs_GE_Obese_6w/SE/664_Mcfd2_chr17_87265792_87265880_-@chr17_87264141_87264365_-@chr17_87257928_87258089_-.pdf	Online figure
ENSMUSG00000024150.10	Mcfd2	6.38668e-08	1.77844e-05	0	0.477	-0.477	chr17	-	SE	exonStart_0base 87264140 exonEnd 87264365 upstreamES 87258782 upstreamEE 87258881 downstreamES 87265834 downstreamEE 87265863	https://betsholtzlab.org/Publications/MouseKidenyOB/splicing/GE_Lean_6w_vs_GE_Obese_6w/SE/665_Mcfd2_chr17_87265835_87265863_-@chr17_87264141_87264365_-@chr17_87258783_87258881_-.pdf	Online figure
ENSMUSG00000024293.14	Esco1	0.00974712	0.0470217	1	0.351	0.649	chr18	-	SE	exonStart_0base 10582054 exonEnd 10582186 upstreamES 10577000 upstreamEE 10577090 downstreamES 10584247 downstreamEE 10584362	https://betsholtzlab.org/Publications/MouseKidenyOB/splicing/GE_Lean_6w_vs_GE_Obese_6w/SE/666_Esco1_chr18_10584248_10584362_-@chr18_10582055_10582186_-@chr18_10577001_10577090_-.pdf	Online figure
ENSMUSG00000027942.15	4933434E20Rik	2.72567e-06	0.000181367	0.934	0.332	0.602	chr3	+	SE	exonStart_0base 90056206 exonEnd 90056324 upstreamES 90053507 upstreamEE 90053609 downstreamES 90058484 downstreamEE 90058651	https://betsholtzlab.org/Publications/MouseKidenyOB/splicing/GE_Lean_6w_vs_GE_Obese_6w/SE/667_4933434E20Rik_chr3_90053508_90053609_+@chr3_90056207_90056324_+@chr3_90058485_90058651_+.pdf	Online figure
ENSMUSG00000027942.15	4933434E20Rik	2.80599e-05	0.000696708	0.935	0.397	0.538	chr3	+	SE	exonStart_0base 90056528 exonEnd 90056582 upstreamES 90053507 upstreamEE 90053609 downstreamES 90058484 downstreamEE 90058651	https://betsholtzlab.org/Publications/MouseKidenyOB/splicing/GE_Lean_6w_vs_GE_Obese_6w/SE/668_4933434E20Rik_chr3_90053508_90053609_+@chr3_90056529_90056582_+@chr3_90058485_90058651_+.pdf	Online figure
ENSMUSG00000048668.14	Rhno1	4.81949e-05	0.000948981	0	0.475	-0.475	chr6	-	SE	exonStart_0base 128362057 exonEnd 128362184 upstreamES 128359105 upstreamEE 128359354 downstreamES 128362367 downstreamEE 128362812	https://betsholtzlab.org/Publications/MouseKidenyOB/splicing/GE_Lean_6w_vs_GE_Obese_6w/SE/669_Rhno1_chr6_128362368_128362812_-@chr6_128362058_128362184_-@chr6_128359106_128359354_-.pdf	Online figure
ENSMUSG00000033382.12	Trappc8	0.0010967	0.00951843	1	0.519	0.481	chr18	-	SE	exonStart_0base 20834945 exonEnd 20835093 upstreamES 20832949 upstreamEE 20833046 downstreamES 20836746 downstreamEE 20837189	https://betsholtzlab.org/Publications/MouseKidenyOB/splicing/GE_Lean_6w_vs_GE_Obese_6w/SE/670_Trappc8_chr18_20836747_20837189_-@chr18_20834946_20835093_-@chr18_20832950_20833046_-.pdf	Online figure
ENSMUSG00000038299.14	Wdr36	0.00183126	0.0139189	0.561	1	-0.439	chr18	+	SE	exonStart_0base 32865852 exonEnd 32865918 upstreamES 32864652 upstreamEE 32864840 downstreamES 32866187 downstreamEE 32866350	https://betsholtzlab.org/Publications/MouseKidenyOB/splicing/GE_Lean_6w_vs_GE_Obese_6w/SE/671_Wdr36_chr18_32864653_32864840_+@chr18_32865853_32865918_+@chr18_32866188_32866350_+.pdf	Online figure
ENSMUSG00000021244.14	Ylpm1	3.70163e-08	1.3393e-05	0	1	-1	chr12	+	SE	exonStart_0base 85041822 exonEnd 85041915 upstreamES 85040572 upstreamEE 85040993 downstreamES 85042121 downstreamEE 85042311	https://betsholtzlab.org/Publications/MouseKidenyOB/splicing/GE_Lean_6w_vs_GE_Obese_6w/SE/672_Ylpm1_chr12_85040573_85040993_+@chr12_85041823_85041915_+@chr12_85042122_85042311_+.pdf	Online figure
ENSMUSG00000042672.14	Dcst1	1.00714e-06	8.88903e-05	1	0	1	chr3	-	SE	exonStart_0base 89358561 exonEnd 89358701 upstreamES 89357507 upstreamEE 89357926 downstreamES 89359074 downstreamEE 89359203	https://betsholtzlab.org/Publications/MouseKidenyOB/splicing/GE_Lean_6w_vs_GE_Obese_6w/SE/673_Dcst1_chr3_89359075_89359203_-@chr3_89358562_89358701_-@chr3_89357508_89357926_-.pdf	Online figure
ENSMUSG00000042672.14	Dcst1	0.00283272	0.0192925	1	0.562	0.438	chr3	-	SE	exonStart_0base 89359074 exonEnd 89359203 upstreamES 89357592 upstreamEE 89357926 downstreamES 89364048 downstreamEE 89364123	https://betsholtzlab.org/Publications/MouseKidenyOB/splicing/GE_Lean_6w_vs_GE_Obese_6w/SE/674_Dcst1_chr3_89364049_89364123_-@chr3_89359075_89359203_-@chr3_89357593_89357926_-.pdf	Online figure
ENSMUSG00000024491.14	Rbm27	2.28818e-07	4.42412e-05	0.207	1	-0.793	chr18	+	SE	exonStart_0base 42313970 exonEnd 42314135 upstreamES 42305679 upstreamEE 42305814 downstreamES 42317600 downstreamEE 42317750	https://betsholtzlab.org/Publications/MouseKidenyOB/splicing/GE_Lean_6w_vs_GE_Obese_6w/SE/675_Rbm27_chr18_42305680_42305814_+@chr18_42313971_42314135_+@chr18_42317601_42317750_+.pdf	Online figure
ENSMUSG00000047030.14	Spata2	2.71414e-05	0.000689129	0	1	-1	chr2	-	SE	exonStart_0base 167489168 exonEnd 167489368 upstreamES 167485405 upstreamEE 167485593 downstreamES 167492758 downstreamEE 167492845	https://betsholtzlab.org/Publications/MouseKidenyOB/splicing/GE_Lean_6w_vs_GE_Obese_6w/SE/676_Spata2_chr2_167492759_167492845_-@chr2_167489169_167489368_-@chr2_167485406_167485593_-.pdf	Online figure
ENSMUSG00000059336.13	Slc14a1	0.00243427	0.0171752	0	0.436	-0.436	chr18	-	SE	exonStart_0base 78120147 exonEnd 78120352 upstreamES 78116372 upstreamEE 78116529 downstreamES 78123241 downstreamEE 78123331	https://betsholtzlab.org/Publications/MouseKidenyOB/splicing/GE_Lean_6w_vs_GE_Obese_6w/SE/677_Slc14a1_chr18_78123242_78123331_-@chr18_78120148_78120352_-@chr18_78116373_78116529_-.pdf	Online figure
ENSMUSG00000024937.13	Ehbp1l1	0.000220577	0.00292202	0.517	1	-0.483	chr19	-	SE	exonStart_0base 5721956 exonEnd 5722010 upstreamES 5721666 upstreamEE 5721845 downstreamES 5722645 downstreamEE 5722741	https://betsholtzlab.org/Publications/MouseKidenyOB/splicing/GE_Lean_6w_vs_GE_Obese_6w/SE/678_Ehbp1l1_chr19_5722646_5722741_-@chr19_5721957_5722010_-@chr19_5721667_5721845_-.pdf	Online figure
ENSMUSG00000024958.11	Gpr137	0.00551634	0.0314622	1	0.495	0.505	chr19	-	SE	exonStart_0base 6939528 exonEnd 6939754 upstreamES 6939260 upstreamEE 6939410 downstreamES 6940351 downstreamEE 6940401	https://betsholtzlab.org/Publications/MouseKidenyOB/splicing/GE_Lean_6w_vs_GE_Obese_6w/SE/679_Gpr137_chr19_6940352_6940401_-@chr19_6939529_6939754_-@chr19_6939261_6939410_-.pdf	Online figure
ENSMUSG00000027478.14	Dnmt3b	9.38723e-06	0.000364355	0	1	-1	chr2	+	SE	exonStart_0base 153650784 exonEnd 153650899 upstreamES 153649452 upstreamEE 153649740 downstreamES 153661424 downstreamEE 153661602	https://betsholtzlab.org/Publications/MouseKidenyOB/splicing/GE_Lean_6w_vs_GE_Obese_6w/SE/680_Dnmt3b_chr2_153649453_153649740_+@chr2_153650785_153650899_+@chr2_153661425_153661602_+.pdf	Online figure
ENSMUSG00000038056.14	Kmt2c	3.15415e-05	0.000707858	1	0	1	chr5	-	SE	exonStart_0base 25330795 exonEnd 25330900 upstreamES 25329446 upstreamEE 25329575 downstreamES 25338412 downstreamEE 25338581	https://betsholtzlab.org/Publications/MouseKidenyOB/splicing/GE_Lean_6w_vs_GE_Obese_6w/SE/681_Kmt2c_chr5_25338413_25338581_-@chr5_25330796_25330900_-@chr5_25329447_25329575_-.pdf	Online figure
ENSMUSG00000035171.8	1110059E24Rik	2.8039e-06	0.000184452	0	0.538	-0.538	chr19	-	SE	exonStart_0base 21630509 exonEnd 21630796 upstreamES 21619108 upstreamEE 21619215 downstreamES 21652606 downstreamEE 21652610	https://betsholtzlab.org/Publications/MouseKidenyOB/splicing/GE_Lean_6w_vs_GE_Obese_6w/SE/682_1110059E24Rik_chr19_21652607_21652610_-@chr19_21630510_21630796_-@chr19_21619109_21619215_-.pdf	Online figure
ENSMUSG00000040929.15	Rfx3	6.26456e-06	0.000281128	0	1	-1	chr19	-	SE	exonStart_0base 27923207 exonEnd 27923266 upstreamES 27900778 upstreamEE 27900903 downstreamES 28010971 downstreamEE 28011166	https://betsholtzlab.org/Publications/MouseKidenyOB/splicing/GE_Lean_6w_vs_GE_Obese_6w/SE/683_Rfx3_chr19_28010972_28011166_-@chr19_27923208_27923266_-@chr19_27900779_27900903_-.pdf	Online figure
ENSMUSG00000025006.14	Sorbs1	0.000102843	0.00164919	1	0.293	0.707	chr19	-	SE	exonStart_0base 40344355 exonEnd 40344439 upstreamES 40340684 upstreamEE 40340750 downstreamES 40349898 downstreamEE 40350013	https://betsholtzlab.org/Publications/MouseKidenyOB/splicing/GE_Lean_6w_vs_GE_Obese_6w/SE/684_Sorbs1_chr19_40349899_40350013_-@chr19_40344356_40344439_-@chr19_40340685_40340750_-.pdf	Online figure
ENSMUSG00000014668.14	Chfr	0.000111926	0.00419213	0.157	1	-0.843	chr5	+	MXE	1stExonStart_0base 110136482 1stExonEnd 110136652 2ndExonStart_0base 110140116 2ndExonEnd 110140189 upstreamES 110136050 upstreamEE 110136194 downstreamES 110140353 downstreamEE 110140453	https://betsholtzlab.org/Publications/MouseKidenyOB/splicing/GE_Lean_6w_vs_GE_Obese_6w/MXE/1_Chfr_chr5_110136051_110136194_+@chr5_110136483_110136652_+@chr5_110140117_110140189_+@chr5_110140354_110140453_+.pdf	Online figure											downstreamES	110140353	downstreamEE	110140453
ENSMUSG00000001052.14	Sec24b	0.000870989	0.0156021	0	0.413	-0.413	chr3	-	MXE	1stExonStart_0base 130020537 1stExonEnd 130020642 2ndExonStart_0base 130030531 2ndExonEnd 130030657 upstreamES 130011791 upstreamEE 130011872 downstreamES 130033830 downstreamEE 130033974	https://betsholtzlab.org/Publications/MouseKidenyOB/splicing/GE_Lean_6w_vs_GE_Obese_6w/MXE/2_Sec24b_chr3_130033831_130033974_-@chr3_130030532_130030657_-@chr3_130020538_130020642_-@chr3_130011792_130011872_-.pdf	Online figure											downstreamES	130033830	downstreamEE	130033974
ENSMUSG00000009207.14	Lnp	0.000226692	0.00622648	0.313	1	-0.687	chr2	-	MXE	1stExonStart_0base 74554987 1stExonEnd 74555046 2ndExonStart_0base 74568940 2ndExonEnd 74569128 upstreamES 74551060 upstreamEE 74551101 downstreamES 74570934 downstreamEE 74570976	https://betsholtzlab.org/Publications/MouseKidenyOB/splicing/GE_Lean_6w_vs_GE_Obese_6w/MXE/3_Lnp_chr2_74570935_74570976_-@chr2_74568941_74569128_-@chr2_74554988_74555046_-@chr2_74551061_74551101_-.pdf	Online figure											downstreamES	74570934	downstreamEE	74570976
ENSMUSG00000029127.14	Zbtb49	2.54188e-05	0.00130907	0.099	1	-0.901	chr5	-	MXE	1stExonStart_0base 38205888 1stExonEnd 38205962 2ndExonStart_0base 38213307 2ndExonEnd 38214383 upstreamES 38203744 upstreamEE 38203827 downstreamES 38216446 downstreamEE 38216613	https://betsholtzlab.org/Publications/MouseKidenyOB/splicing/GE_Lean_6w_vs_GE_Obese_6w/MXE/4_Zbtb49_chr5_38216447_38216613_-@chr5_38213308_38214383_-@chr5_38205889_38205962_-@chr5_38203745_38203827_-.pdf	Online figure											downstreamES	38216446	downstreamEE	38216613
ENSMUSG00000029127.14	Zbtb49	1.25179e-05	0.000859565	0.038	1	-0.962	chr5	-	MXE	1stExonStart_0base 38210617 1stExonEnd 38210664 2ndExonStart_0base 38213307 2ndExonEnd 38214064 upstreamES 38205888 upstreamEE 38205962 downstreamES 38216446 downstreamEE 38216613	https://betsholtzlab.org/Publications/MouseKidenyOB/splicing/GE_Lean_6w_vs_GE_Obese_6w/MXE/5_Zbtb49_chr5_38216447_38216613_-@chr5_38213308_38214064_-@chr5_38210618_38210664_-@chr5_38205889_38205962_-.pdf	Online figure											downstreamES	38216446	downstreamEE	38216613
ENSMUSG00000029127.14	Zbtb49	3.38455e-05	0.00154937	0.102	1	-0.898	chr5	-	MXE	1stExonStart_0base 38210617 1stExonEnd 38210664 2ndExonStart_0base 38213307 2ndExonEnd 38214383 upstreamES 38205888 upstreamEE 38205962 downstreamES 38216446 downstreamEE 38216613	https://betsholtzlab.org/Publications/MouseKidenyOB/splicing/GE_Lean_6w_vs_GE_Obese_6w/MXE/6_Zbtb49_chr5_38216447_38216613_-@chr5_38213308_38214383_-@chr5_38210618_38210664_-@chr5_38205889_38205962_-.pdf	Online figure											downstreamES	38216446	downstreamEE	38216613
ENSMUSG00000049550.16	Clip1	0.00033992	0.00810914	0	0.849	-0.849	chr5	-	MXE	1stExonStart_0base 123635173 1stExonEnd 123635278 2ndExonStart_0base 123638955 2ndExonEnd 123638988 upstreamES 123630224 upstreamEE 123631169 downstreamES 123640493 downstreamEE 123640554	https://betsholtzlab.org/Publications/MouseKidenyOB/splicing/GE_Lean_6w_vs_GE_Obese_6w/MXE/7_Clip1_chr5_123640494_123640554_-@chr5_123638956_123638988_-@chr5_123635174_123635278_-@chr5_123630225_123631169_-.pdf	Online figure											downstreamES	123640493	downstreamEE	123640554
ENSMUSG00000026409.13	Pfkfb2	0.000354283	0.00810914	1	0.2	0.8	chr1	-	MXE	1stExonStart_0base 130699187 1stExonEnd 130699250 2ndExonStart_0base 130699980 2ndExonEnd 130700110 upstreamES 130698678 upstreamEE 130698743 downstreamES 130700769 downstreamEE 130700874	https://betsholtzlab.org/Publications/MouseKidenyOB/splicing/GE_Lean_6w_vs_GE_Obese_6w/MXE/8_Pfkfb2_chr1_130700770_130700874_-@chr1_130699981_130700110_-@chr1_130699188_130699250_-@chr1_130698679_130698743_-.pdf	Online figure											downstreamES	130700769	downstreamEE	130700874
ENSMUSG00000021614.15	Vcan	0	0	1	0	1	chr13	-	MXE	1stExonStart_0base 89688284 1stExonEnd 89693501 2ndExonStart_0base 89702917 2ndExonEnd 89705797 upstreamES 89685078 upstreamEE 89685192 downstreamES 89712204 downstreamEE 89712498	https://betsholtzlab.org/Publications/MouseKidenyOB/splicing/GE_Lean_6w_vs_GE_Obese_6w/MXE/9_Vcan_chr13_89712205_89712498_-@chr13_89702918_89705797_-@chr13_89688285_89693501_-@chr13_89685079_89685192_-.pdf	Online figure											downstreamES	89712204	downstreamEE	89712498
ENSMUSG00000039158.11	Akna	0.00165596	0.0220083	0	0.485	-0.485	chr4	-	MXE	1stExonStart_0base 63370891 1stExonEnd 63371011 2ndExonStart_0base 63371796 2ndExonEnd 63371892 upstreamES 63370471 upstreamEE 63370652 downstreamES 63373322 downstreamEE 63373469	https://betsholtzlab.org/Publications/MouseKidenyOB/splicing/GE_Lean_6w_vs_GE_Obese_6w/MXE/10_Akna_chr4_63373323_63373469_-@chr4_63371797_63371892_-@chr4_63370892_63371011_-@chr4_63370472_63370652_-.pdf	Online figure											downstreamES	63373322	downstreamEE	63373469
ENSMUSG00000039158.11	Akna	0.00329219	0.040765	1	0.52	0.48	chr4	-	MXE	1stExonStart_0base 63371796 1stExonEnd 63371892 2ndExonStart_0base 63373322 2ndExonEnd 63373469 upstreamES 63370891 upstreamEE 63371011 downstreamES 63373996 downstreamEE 63374112	https://betsholtzlab.org/Publications/MouseKidenyOB/splicing/GE_Lean_6w_vs_GE_Obese_6w/MXE/11_Akna_chr4_63373997_63374112_-@chr4_63373323_63373469_-@chr4_63371797_63371892_-@chr4_63370892_63371011_-.pdf	Online figure											downstreamES	63373996	downstreamEE	63374112
ENSMUSG00000030766.14	Arhgap17	7.33814e-07	7.55829e-05	0.078	1	-0.922	chr7	-	MXE	1stExonStart_0base 123283776 1stExonEnd 123283825 2ndExonStart_0base 123285419 2ndExonEnd 123285467 upstreamES 123279149 upstreamEE 123280116 downstreamES 123286497 downstreamEE 123287013	https://betsholtzlab.org/Publications/MouseKidenyOB/splicing/GE_Lean_6w_vs_GE_Obese_6w/MXE/12_Arhgap17_chr7_123286498_123287013_-@chr7_123285420_123285467_-@chr7_123283777_123283825_-@chr7_123279150_123280116_-.pdf	Online figure											downstreamES	123286497	downstreamEE	123287013
ENSMUSG00000043384.14	Gprasp1	0.000559883	0.0109844	0.644	0	0.644	chrX	+	MXE	1stExonStart_0base 135743441 1stExonEnd 135743522 2ndExonStart_0base 135743562 2ndExonEnd 135743614 upstreamES 135742732 upstreamEE 135742978 downstreamES 135744498 downstreamEE 135744575	https://betsholtzlab.org/Publications/MouseKidenyOB/splicing/GE_Lean_6w_vs_GE_Obese_6w/MXE/13_Gprasp1_chrX_135742733_135742978_+@chrX_135743442_135743522_+@chrX_135743563_135743614_+@chrX_135744499_135744575_+.pdf	Online figure											downstreamES	135744498	downstreamEE	135744575
ENSMUSG00000037174.17	Elf2	0.00110524	0.0175139	1	0.589	0.411	chr3	-	MXE	1stExonStart_0base 51294092 1stExonEnd 51294188 2ndExonStart_0base 51299782 2ndExonEnd 51299885 upstreamES 51266752 upstreamEE 51266866 downstreamES 51308049 downstreamEE 51308215	https://betsholtzlab.org/Publications/MouseKidenyOB/splicing/GE_Lean_6w_vs_GE_Obese_6w/MXE/14_Elf2_chr3_51308050_51308215_-@chr3_51299783_51299885_-@chr3_51294093_51294188_-@chr3_51266753_51266866_-.pdf	Online figure											downstreamES	51308049	downstreamEE	51308215
ENSMUSG00000059475.12	Zfp426	1.54109e-05	0.000907044	1	0	1	chr9	-	MXE	1stExonStart_0base 20474906 1stExonEnd 20475033 2ndExonStart_0base 20478132 2ndExonEnd 20478158 upstreamES 20473027 upstreamEE 20473108 downstreamES 20486329 downstreamEE 20486437	https://betsholtzlab.org/Publications/MouseKidenyOB/splicing/GE_Lean_6w_vs_GE_Obese_6w/MXE/15_Zfp426_chr9_20486330_20486437_-@chr9_20478133_20478158_-@chr9_20474907_20475033_-@chr9_20473028_20473108_-.pdf	Online figure											downstreamES	20486329	downstreamEE	20486437
ENSMUSG00000059475.12	Zfp426	3.24803e-07	4.46063e-05	1	0.181	0.819	chr9	-	MXE	1stExonStart_0base 20474906 1stExonEnd 20475033 2ndExonStart_0base 20478132 2ndExonEnd 20478254 upstreamES 20473027 upstreamEE 20473108 downstreamES 20486329 downstreamEE 20486437	https://betsholtzlab.org/Publications/MouseKidenyOB/splicing/GE_Lean_6w_vs_GE_Obese_6w/MXE/16_Zfp426_chr9_20486330_20486437_-@chr9_20478133_20478254_-@chr9_20474907_20475033_-@chr9_20473028_20473108_-.pdf	Online figure											downstreamES	20486329	downstreamEE	20486437
ENSMUSG00000059475.12	Zfp426	6.33651e-06	0.000522129	1	0.114	0.886	chr9	-	MXE	1stExonStart_0base 20474906 1stExonEnd 20475033 2ndExonStart_0base 20478132 2ndExonEnd 20478279 upstreamES 20473027 upstreamEE 20473108 downstreamES 20486329 downstreamEE 20486437	https://betsholtzlab.org/Publications/MouseKidenyOB/splicing/GE_Lean_6w_vs_GE_Obese_6w/MXE/17_Zfp426_chr9_20486330_20486437_-@chr9_20478133_20478279_-@chr9_20474907_20475033_-@chr9_20473028_20473108_-.pdf	Online figure											downstreamES	20486329	downstreamEE	20486437
ENSMUSG00000041119.10	Pde9a	0.0033641	0.040765	1	0.485	0.515	chr17	+	MXE	1stExonStart_0base 31414100 1stExonEnd 31414171 2ndExonStart_0base 31415279 2ndExonEnd 31415357 upstreamES 31386248 upstreamEE 31386356 downstreamES 31420244 downstreamEE 31420288	https://betsholtzlab.org/Publications/MouseKidenyOB/splicing/GE_Lean_6w_vs_GE_Obese_6w/MXE/18_Pde9a_chr17_31386249_31386356_+@chr17_31414101_31414171_+@chr17_31415280_31415357_+@chr17_31420245_31420288_+.pdf	Online figure											downstreamES	31420244	downstreamEE	31420288
ENSMUSG00000044573.13	Acp1	0.000174585	0.00553299	0.724	0.28	0.444	chr12	-	MXE	1stExonStart_0base 30904717 1stExonEnd 30904831 2ndExonStart_0base 30904869 2ndExonEnd 30904983 upstreamES 30897744 upstreamEE 30897806 downstreamES 30905068 downstreamEE 30905142	https://betsholtzlab.org/Publications/MouseKidenyOB/splicing/GE_Lean_6w_vs_GE_Obese_6w/MXE/19_Acp1_chr12_30905069_30905142_-@chr12_30904870_30904983_-@chr12_30904718_30904831_-@chr12_30897745_30897806_-.pdf	Online figure											downstreamES	30905068	downstreamEE	30905142
ENSMUSG00000037536.12	Fbxo34	0.00140122	0.0199069	0	0.441	-0.441	chr14	+	MXE	1stExonStart_0base 47500793 1stExonEnd 47500870 2ndExonStart_0base 47526204 2ndExonEnd 47526314 upstreamES 47472560 upstreamEE 47472717 downstreamES 47529174 downstreamEE 47531962	https://betsholtzlab.org/Publications/MouseKidenyOB/splicing/GE_Lean_6w_vs_GE_Obese_6w/MXE/20_Fbxo34_chr14_47472561_47472717_+@chr14_47500794_47500870_+@chr14_47526205_47526314_+@chr14_47529175_47531962_+.pdf	Online figure											downstreamES	47529174	downstreamEE	47531962
ENSMUSG00000038344.13	Txlng	9.75274e-06	0.000170018	0	0.445	-0.445	chrX	-	RI	riExonStart_0base 162786616 riExonEnd 162787678 upstreamES 162786616 upstreamEE 162786691 downstreamES 162787558 downstreamEE 162787678	https://betsholtzlab.org/Publications/MouseKidenyOB/splicing/GE_Lean_6w_vs_GE_Obese_6w/RI/1_Txlng_chrX_162787559_162787678_-@chrX_162786617_162787678_-@chrX_162786617_162786691_-.pdf	Online figure
ENSMUSG00000031256.10	Cstf2	0.000588132	0.00338393	1	0.105	0.895	chrX	+	RI	riExonStart_0base 134069844 riExonEnd 134073277 upstreamES 134069844 upstreamEE 134069907 downstreamES 134073213 downstreamEE 134073277	https://betsholtzlab.org/Publications/MouseKidenyOB/splicing/GE_Lean_6w_vs_GE_Obese_6w/RI/2_Cstf2_chrX_134069845_134069907_+@chrX_134069845_134073277_+@chrX_134073214_134073277_+.pdf	Online figure
ENSMUSG00000009995.16	Taz	0.000268696	0.0018461	1	0.525	0.475	chrX	+	RI	riExonStart_0base 74288177 riExonEnd 74288513 upstreamES 74288177 upstreamEE 74288219 downstreamES 74288447 downstreamEE 74288513	https://betsholtzlab.org/Publications/MouseKidenyOB/splicing/GE_Lean_6w_vs_GE_Obese_6w/RI/3_Taz_chrX_74288178_74288219_+@chrX_74288178_74288513_+@chrX_74288448_74288513_+.pdf	Online figure
ENSMUSG00000031388.13	Naa10	7.52937e-05	0.000732858	0.086	1	-0.914	chrX	-	RI	riExonStart_0base 73919501 riExonEnd 73919869 upstreamES 73919501 upstreamEE 73919540 downstreamES 73919753 downstreamEE 73919869	https://betsholtzlab.org/Publications/MouseKidenyOB/splicing/GE_Lean_6w_vs_GE_Obese_6w/RI/4_Naa10_chrX_73919754_73919869_-@chrX_73919502_73919869_-@chrX_73919502_73919540_-.pdf	Online figure
ENSMUSG00000039231.17	Suv39h1	1.88812e-06	5.14644e-05	0	1	-1	chrX	-	RI	riExonStart_0base 8063695 riExonEnd 8064057 upstreamES 8063695 upstreamEE 8063825 downstreamES 8063910 downstreamEE 8064057	https://betsholtzlab.org/Publications/MouseKidenyOB/splicing/GE_Lean_6w_vs_GE_Obese_6w/RI/5_Suv39h1_chrX_8063911_8064057_-@chrX_8063696_8064057_-@chrX_8063696_8063825_-.pdf	Online figure
ENSMUSG00000025060.13	Slk	3.05361e-05	0.000367515	1	0	1	chr19	+	RI	riExonStart_0base 47622235 riExonEnd 47622694 upstreamES 47622235 upstreamEE 47622366 downstreamES 47622570 downstreamEE 47622694	https://betsholtzlab.org/Publications/MouseKidenyOB/splicing/GE_Lean_6w_vs_GE_Obese_6w/RI/6_Slk_chr19_47622236_47622366_+@chr19_47622236_47622694_+@chr19_47622571_47622694_+.pdf	Online figure
ENSMUSG00000079197.9	Psme2	0.00269166	0.0117308	0.423	0	0.423	chr14	-	RI	riExonStart_0base 55589480 riExonEnd 55589705 upstreamES 55589480 upstreamEE 55589511 downstreamES 55589618 downstreamEE 55589705	https://betsholtzlab.org/Publications/MouseKidenyOB/splicing/GE_Lean_6w_vs_GE_Obese_6w/RI/7_Psme2_chr14_55589619_55589705_-@chr14_55589481_55589705_-@chr14_55589481_55589511_-.pdf	Online figure
ENSMUSG00000031537.14	Ikbkb	0.00859879	0.0294528	0.897	0.491	0.406	chr8	-	RI	riExonStart_0base 22668944 riExonEnd 22671745 upstreamES 22668944 upstreamEE 22669096 downstreamES 22671630 downstreamEE 22671745	https://betsholtzlab.org/Publications/MouseKidenyOB/splicing/GE_Lean_6w_vs_GE_Obese_6w/RI/8_Ikbkb_chr8_22671631_22671745_-@chr8_22668945_22671745_-@chr8_22668945_22669096_-.pdf	Online figure
ENSMUSG00000025766.13	D3Ertd751e	0.00106066	0.00553059	1	0.435	0.565	chr3	+	RI	riExonStart_0base 41756048 riExonEnd 41758939 upstreamES 41756048 upstreamEE 41756129 downstreamES 41758623 downstreamEE 41758939	https://betsholtzlab.org/Publications/MouseKidenyOB/splicing/GE_Lean_6w_vs_GE_Obese_6w/RI/9_D3Ertd751e_chr3_41756049_41756129_+@chr3_41756049_41758939_+@chr3_41758624_41758939_+.pdf	Online figure
ENSMUSG00000062963.9	Ufc1	5.9401e-11	8.26838e-09	1	0	1	chr1	-	RI	riExonStart_0base 171289517 riExonEnd 171289947 upstreamES 171289517 upstreamEE 171289594 downstreamES 171289854 downstreamEE 171289947	https://betsholtzlab.org/Publications/MouseKidenyOB/splicing/GE_Lean_6w_vs_GE_Obese_6w/RI/10_Ufc1_chr1_171289855_171289947_-@chr1_171289518_171289947_-@chr1_171289518_171289594_-.pdf	Online figure
ENSMUSG00000003778.13	Brd8	1.93525e-05	0.00027217	0.418	0	0.418	chr18	-	RI	riExonStart_0base 34608417 riExonEnd 34609949 upstreamES 34608417 upstreamEE 34608627 downstreamES 34609804 downstreamEE 34609949	https://betsholtzlab.org/Publications/MouseKidenyOB/splicing/GE_Lean_6w_vs_GE_Obese_6w/RI/11_Brd8_chr18_34609805_34609949_-@chr18_34608418_34609949_-@chr18_34608418_34608627_-.pdf	Online figure
ENSMUSG00000039205.15	Ciz1	0.000567717	0.00329897	0.412	1	-0.588	chr2	+	RI	riExonStart_0base 32363197 riExonEnd 32363656 upstreamES 32363197 upstreamEE 32363298 downstreamES 32363622 downstreamEE 32363656	https://betsholtzlab.org/Publications/MouseKidenyOB/splicing/GE_Lean_6w_vs_GE_Obese_6w/RI/12_Ciz1_chr2_32363198_32363298_+@chr2_32363198_32363656_+@chr2_32363623_32363656_+.pdf	Online figure
ENSMUSG00000008668.13	Rps18	0.00500697	0.0193008	1	0.261	0.739	chr17	-	RI	riExonStart_0base 33952220 riExonEnd 33952591 upstreamES 33952220 upstreamEE 33952312 downstreamES 33952402 downstreamEE 33952591	https://betsholtzlab.org/Publications/MouseKidenyOB/splicing/GE_Lean_6w_vs_GE_Obese_6w/RI/13_Rps18_chr17_33952403_33952591_-@chr17_33952221_33952591_-@chr17_33952221_33952312_-.pdf	Online figure
ENSMUSG00000034761.14	Map4k5	2.38969e-05	0.000305092	0.512	0.035	0.477	chr12	-	RI	riExonStart_0base 69807197 riExonEnd 69809282 upstreamES 69807197 upstreamEE 69807253 downstreamES 69809211 downstreamEE 69809282	https://betsholtzlab.org/Publications/MouseKidenyOB/splicing/GE_Lean_6w_vs_GE_Obese_6w/RI/14_Map4k5_chr12_69809212_69809282_-@chr12_69807198_69809282_-@chr12_69807198_69807253_-.pdf	Online figure
ENSMUSG00000078765.9	U2af1l4	2.93065e-07	1.2225e-05	0	0.431	-0.431	chr7	+	RI	riExonStart_0base 30563325 riExonEnd 30563619 upstreamES 30563325 upstreamEE 30563399 downstreamES 30563531 downstreamEE 30563619	https://betsholtzlab.org/Publications/MouseKidenyOB/splicing/GE_Lean_6w_vs_GE_Obese_6w/RI/15_U2af1l4_chr7_30563326_30563399_+@chr7_30563326_30563619_+@chr7_30563532_30563619_+.pdf	Online figure
ENSMUSG00000033540.17	Idua	0.000443516	0.00274641	0.589	0	0.589	chr5	+	RI	riExonStart_0base 108680110 riExonEnd 108680497 upstreamES 108680110 upstreamEE 108680206 downstreamES 108680294 downstreamEE 108680497	https://betsholtzlab.org/Publications/MouseKidenyOB/splicing/GE_Lean_6w_vs_GE_Obese_6w/RI/16_Idua_chr5_108680111_108680206_+@chr5_108680111_108680497_+@chr5_108680295_108680497_+.pdf	Online figure
ENSMUSG00000022386.11	Trmu	2.2053e-06	5.59954e-05	0	1	-1	chr15	+	RI	riExonStart_0base 85896359 riExonEnd 85896917 upstreamES 85896359 upstreamEE 85896504 downstreamES 85896834 downstreamEE 85896917	https://betsholtzlab.org/Publications/MouseKidenyOB/splicing/GE_Lean_6w_vs_GE_Obese_6w/RI/17_Trmu_chr15_85896360_85896504_+@chr15_85896360_85896917_+@chr15_85896835_85896917_+.pdf	Online figure
ENSMUSG00000029208.15	Guf1	8.8656e-05	0.000815356	0.04	1	-0.96	chr5	+	RI	riExonStart_0base 69567127 riExonEnd 69568497 upstreamES 69567127 upstreamEE 69567261 downstreamES 69568395 downstreamEE 69568497	https://betsholtzlab.org/Publications/MouseKidenyOB/splicing/GE_Lean_6w_vs_GE_Obese_6w/RI/18_Guf1_chr5_69567128_69567261_+@chr5_69567128_69568497_+@chr5_69568396_69568497_+.pdf	Online figure
ENSMUSG00000068917.11	Clk2	1.15835e-05	0.000187911	0	1	-1	chr3	+	RI	riExonStart_0base 89169614 riExonEnd 89170115 upstreamES 89169614 upstreamEE 89169702 downstreamES 89170048 downstreamEE 89170115	https://betsholtzlab.org/Publications/MouseKidenyOB/splicing/GE_Lean_6w_vs_GE_Obese_6w/RI/19_Clk2_chr3_89169615_89169702_+@chr3_89169615_89170115_+@chr3_89170049_89170115_+.pdf	Online figure
ENSMUSG00000051557.14	Pusl1	0.000539902	0.00316887	0.291	0.792	-0.501	chr4	-	RI	riExonStart_0base 155891051 riExonEnd 155891415 upstreamES 155891051 upstreamEE 155891239 downstreamES 155891357 downstreamEE 155891415	https://betsholtzlab.org/Publications/MouseKidenyOB/splicing/GE_Lean_6w_vs_GE_Obese_6w/RI/20_Pusl1_chr4_155891358_155891415_-@chr4_155891052_155891415_-@chr4_155891052_155891239_-.pdf	Online figure
ENSMUSG00000028759.12	Hp1bp3	0.0156543	0.0464066	0.407	1	-0.593	chr4	+	RI	riExonStart_0base 138225888 riExonEnd 138228787 upstreamES 138225888 upstreamEE 138226052 downstreamES 138228647 downstreamEE 138228787	https://betsholtzlab.org/Publications/MouseKidenyOB/splicing/GE_Lean_6w_vs_GE_Obese_6w/RI/21_Hp1bp3_chr4_138225889_138226052_+@chr4_138225889_138228787_+@chr4_138228648_138228787_+.pdf	Online figure
ENSMUSG00000035478.13	Mbd3	0.0028032	0.0121715	0.37	1	-0.63	chr10	-	RI	riExonStart_0base 80392538 riExonEnd 80393280 upstreamES 80392538 upstreamEE 80393018 downstreamES 80393094 downstreamEE 80393280	https://betsholtzlab.org/Publications/MouseKidenyOB/splicing/GE_Lean_6w_vs_GE_Obese_6w/RI/22_Mbd3_chr10_80393095_80393280_-@chr10_80392539_80393280_-@chr10_80392539_80393018_-.pdf	Online figure
ENSMUSG00000011877.12	Git1	0.000161419	0.00123227	0.052	1	-0.948	chr11	+	RI	riExonStart_0base 77503355 riExonEnd 77504018 upstreamES 77503355 upstreamEE 77503428 downstreamES 77503920 downstreamEE 77504018	https://betsholtzlab.org/Publications/MouseKidenyOB/splicing/GE_Lean_6w_vs_GE_Obese_6w/RI/23_Git1_chr11_77503356_77503428_+@chr11_77503356_77504018_+@chr11_77503921_77504018_+.pdf	Online figure
ENSMUSG00000056962.10	Jmjd6	0.00227619	0.0104258	0.587	1	-0.413	chr11	-	RI	riExonStart_0base 116839837 riExonEnd 116840545 upstreamES 116839837 upstreamEE 116839926 downstreamES 116840447 downstreamEE 116840545	https://betsholtzlab.org/Publications/MouseKidenyOB/splicing/GE_Lean_6w_vs_GE_Obese_6w/RI/24_Jmjd6_chr11_116840448_116840545_-@chr11_116839838_116840545_-@chr11_116839838_116839926_-.pdf	Online figure
ENSMUSG00000022562.12	Oplah	6.03924e-06	0.000124959	1	0	1	chr15	-	RI	riExonStart_0base 76296602 riExonEnd 76297018 upstreamES 76296602 upstreamEE 76296781 downstreamES 76296920 downstreamEE 76297018	https://betsholtzlab.org/Publications/MouseKidenyOB/splicing/GE_Lean_6w_vs_GE_Obese_6w/RI/25_Oplah_chr15_76296921_76297018_-@chr15_76296603_76297018_-@chr15_76296603_76296781_-.pdf	Online figure
ENSMUSG00000034610.13	Zcchc11	3.6507e-08	2.3689e-06	0	0.718	-0.718	chr4	+	RI	riExonStart_0base 108557321 riExonEnd 108559415 upstreamES 108557321 upstreamEE 108557474 downstreamES 108558714 downstreamEE 108559415	https://betsholtzlab.org/Publications/MouseKidenyOB/splicing/GE_Lean_6w_vs_GE_Obese_6w/RI/26_Zcchc11_chr4_108557322_108557474_+@chr4_108557322_108559415_+@chr4_108558715_108559415_+.pdf	Online figure
ENSMUSG00000026848.13	Tor1b	7.11919e-06	0.000143366	0.085	1	-0.915	chr2	+	RI	riExonStart_0base 30953751 riExonEnd 30955953 upstreamES 30953751 upstreamEE 30954017 downstreamES 30955767 downstreamEE 30955953	https://betsholtzlab.org/Publications/MouseKidenyOB/splicing/GE_Lean_6w_vs_GE_Obese_6w/RI/27_Tor1b_chr2_30953752_30954017_+@chr2_30953752_30955953_+@chr2_30955768_30955953_+.pdf	Online figure
ENSMUSG00000047617.10	BC029214	0.000104165	0.000904237	0.104	0.743	-0.639	chr2	-	RI	riExonStart_0base 25460008 riExonEnd 25460357 upstreamES 25460008 upstreamEE 25460074 downstreamES 25460166 downstreamEE 25460357	https://betsholtzlab.org/Publications/MouseKidenyOB/splicing/GE_Lean_6w_vs_GE_Obese_6w/RI/28_BC029214_chr2_25460167_25460357_-@chr2_25460009_25460357_-@chr2_25460009_25460074_-.pdf	Online figure
ENSMUSG00000032363.14	Adamts7	0.00514409	0.019635	0.464	1	-0.536	chr9	+	RI	riExonStart_0base 90193024 riExonEnd 90194269 upstreamES 90193024 upstreamEE 90193865 downstreamES 90194042 downstreamEE 90194269	https://betsholtzlab.org/Publications/MouseKidenyOB/splicing/GE_Lean_6w_vs_GE_Obese_6w/RI/29_Adamts7_chr9_90193025_90193865_+@chr9_90193025_90194269_+@chr9_90194043_90194269_+.pdf	Online figure
ENSMUSG00000057110.14	Cntrl	0.000270674	0.00184881	0.472	1	-0.528	chr2	+	RI	riExonStart_0base 35175537 riExonEnd 35176322 upstreamES 35175537 upstreamEE 35175600 downstreamES 35176127 downstreamEE 35176322	https://betsholtzlab.org/Publications/MouseKidenyOB/splicing/GE_Lean_6w_vs_GE_Obese_6w/RI/30_Cntrl_chr2_35175538_35175600_+@chr2_35175538_35176322_+@chr2_35176128_35176322_+.pdf	Online figure
ENSMUSG00000006301.16	Tmbim1	1.25846e-07	5.94448e-06	1	0.011	0.989	chr1	-	RI	riExonStart_0base 74291694 riExonEnd 74292888 upstreamES 74291694 upstreamEE 74291734 downstreamES 74292834 downstreamEE 74292888	https://betsholtzlab.org/Publications/MouseKidenyOB/splicing/GE_Lean_6w_vs_GE_Obese_6w/RI/31_Tmbim1_chr1_74292835_74292888_-@chr1_74291695_74292888_-@chr1_74291695_74291734_-.pdf	Online figure
ENSMUSG00000056211.12	R3hdm1	0.00809055	0.0283777	1	0.354	0.646	chr1	+	RI	riExonStart_0base 128181985 riExonEnd 128184654 upstreamES 128181985 upstreamEE 128182212 downstreamES 128184399 downstreamEE 128184654	https://betsholtzlab.org/Publications/MouseKidenyOB/splicing/GE_Lean_6w_vs_GE_Obese_6w/RI/32_R3hdm1_chr1_128181986_128182212_+@chr1_128181986_128184654_+@chr1_128184400_128184654_+.pdf	Online figure
ENSMUSG00000001687.14	Ubl3	6.78161e-05	0.000677002	0	1	-1	chr5	-	RI	riExonStart_0base 148552156 riExonEnd 148552789 upstreamES 148552156 upstreamEE 148552587 downstreamES 148552637 downstreamEE 148552789	https://betsholtzlab.org/Publications/MouseKidenyOB/splicing/GE_Lean_6w_vs_GE_Obese_6w/RI/33_Ubl3_chr5_148552638_148552789_-@chr5_148552157_148552789_-@chr5_148552157_148552587_-.pdf	Online figure
ENSMUSG00000026927.16	Sdccag3	0.000124483	0.00104602	0.455	0.887	-0.432	chr2	-	RI	riExonStart_0base 26385497 riExonEnd 26386063 upstreamES 26385497 upstreamEE 26385609 downstreamES 26385989 downstreamEE 26386063	https://betsholtzlab.org/Publications/MouseKidenyOB/splicing/GE_Lean_6w_vs_GE_Obese_6w/RI/34_Sdccag3_chr2_26385990_26386063_-@chr2_26385498_26386063_-@chr2_26385498_26385609_-.pdf	Online figure
ENSMUSG00000034211.13	Mrps17	9.6225e-05	0.000869386	0.563	1	-0.437	chr5	+	RI	riExonStart_0base 129715683 riExonEnd 129716866 upstreamES 129715683 upstreamEE 129715858 downstreamES 129716726 downstreamEE 129716866	https://betsholtzlab.org/Publications/MouseKidenyOB/splicing/GE_Lean_6w_vs_GE_Obese_6w/RI/35_Mrps17_chr5_129715684_129715858_+@chr5_129715684_129716866_+@chr5_129716727_129716866_+.pdf	Online figure
ENSMUSG00000057335.10	Cep170	9.17716e-06	0.000166822	0	1	-1	chr1	-	RI	riExonStart_0base 176733661 riExonEnd 176736895 upstreamES 176733661 upstreamEE 176735981 downstreamES 176736843 downstreamEE 176736895	https://betsholtzlab.org/Publications/MouseKidenyOB/splicing/GE_Lean_6w_vs_GE_Obese_6w/RI/36_Cep170_chr1_176736844_176736895_-@chr1_176733662_176736895_-@chr1_176733662_176735981_-.pdf	Online figure
ENSMUSG00000020817.15	Rabep1	1.76249e-05	0.000251048	1	0	1	chr11	+	RI	riExonStart_0base 70934404 riExonEnd 70935182 upstreamES 70934404 upstreamEE 70934594 downstreamES 70935126 downstreamEE 70935182	https://betsholtzlab.org/Publications/MouseKidenyOB/splicing/GE_Lean_6w_vs_GE_Obese_6w/RI/37_Rabep1_chr11_70934405_70934594_+@chr11_70934405_70935182_+@chr11_70935127_70935182_+.pdf	Online figure
ENSMUSG00000026200.12	Glb1l	0.000248342	0.00171635	0.155	1	-0.845	chr1	-	RI	riExonStart_0base 75208686 riExonEnd 75209222 upstreamES 75208686 upstreamEE 75208837 downstreamES 75209055 downstreamEE 75209222	https://betsholtzlab.org/Publications/MouseKidenyOB/splicing/GE_Lean_6w_vs_GE_Obese_6w/RI/38_Glb1l_chr1_75209056_75209222_-@chr1_75208687_75209222_-@chr1_75208687_75208837_-.pdf	Online figure
ENSMUSG00000003031.13	Cdkn1b	0	0	0.008	1	-0.992	chr6	+	RI	riExonStart_0base 134921955 riExonEnd 134925513 upstreamES 134921955 upstreamEE 134922083 downstreamES 134924242 downstreamEE 134925513	https://betsholtzlab.org/Publications/MouseKidenyOB/splicing/GE_Lean_6w_vs_GE_Obese_6w/RI/39_Cdkn1b_chr6_134921956_134922083_+@chr6_134921956_134925513_+@chr6_134924243_134925513_+.pdf	Online figure
ENSMUSG00000004815.11	Dgkq	1.69641e-05	0.000244618	1	0	1	chr5	-	RI	riExonStart_0base 108649824 riExonEnd 108650379 upstreamES 108649824 upstreamEE 108649925 downstreamES 108650200 downstreamEE 108650379	https://betsholtzlab.org/Publications/MouseKidenyOB/splicing/GE_Lean_6w_vs_GE_Obese_6w/RI/40_Dgkq_chr5_108650201_108650379_-@chr5_108649825_108650379_-@chr5_108649825_108649925_-.pdf	Online figure
ENSMUSG00000027968.10	Larp7	2.1894e-05	0.000293149	0	1	-1	chr3	-	RI	riExonStart_0base 127546046 riExonEnd 127546569 upstreamES 127546046 upstreamEE 127546403 downstreamES 127546475 downstreamEE 127546569	https://betsholtzlab.org/Publications/MouseKidenyOB/splicing/GE_Lean_6w_vs_GE_Obese_6w/RI/41_Larp7_chr3_127546476_127546569_-@chr3_127546047_127546569_-@chr3_127546047_127546403_-.pdf	Online figure
ENSMUSG00000071103.8	1700029J07Rik	0.000402648	0.00255594	1	0.092	0.908	chr8	-	RI	riExonStart_0base 45973503 riExonEnd 45975252 upstreamES 45973503 upstreamEE 45973680 downstreamES 45975078 downstreamEE 45975252	https://betsholtzlab.org/Publications/MouseKidenyOB/splicing/GE_Lean_6w_vs_GE_Obese_6w/RI/42_1700029J07Rik_chr8_45975079_45975252_-@chr8_45973504_45975252_-@chr8_45973504_45973680_-.pdf	Online figure
ENSMUSG00000027247.15	Arhgap1	0.00146575	0.00731624	1	0.532	0.468	chr2	+	RI	riExonStart_0base 91651497 riExonEnd 91651823 upstreamES 91651497 upstreamEE 91651654 downstreamES 91651763 downstreamEE 91651823	https://betsholtzlab.org/Publications/MouseKidenyOB/splicing/GE_Lean_6w_vs_GE_Obese_6w/RI/43_Arhgap1_chr2_91651498_91651654_+@chr2_91651498_91651823_+@chr2_91651764_91651823_+.pdf	Online figure
ENSMUSG00000028689.13	Ccdc163	0.000179587	0.00134174	0.179	0.674	-0.495	chr4	+	RI	riExonStart_0base 116709239 riExonEnd 116709619 upstreamES 116709239 upstreamEE 116709273 downstreamES 116709437 downstreamEE 116709619	https://betsholtzlab.org/Publications/MouseKidenyOB/splicing/GE_Lean_6w_vs_GE_Obese_6w/RI/44_Ccdc163_chr4_116709240_116709273_+@chr4_116709240_116709619_+@chr4_116709438_116709619_+.pdf	Online figure
ENSMUSG00000048495.15	Tyw5	3.87166e-06	8.53226e-05	0.481	0.026	0.455	chr1	-	RI	riExonStart_0base 57393349 riExonEnd 57394091 upstreamES 57393349 upstreamEE 57393487 downstreamES 57394046 downstreamEE 57394091	https://betsholtzlab.org/Publications/MouseKidenyOB/splicing/GE_Lean_6w_vs_GE_Obese_6w/RI/45_Tyw5_chr1_57394047_57394091_-@chr1_57393350_57394091_-@chr1_57393350_57393487_-.pdf	Online figure
ENSMUSG00000028057.13	Rit1	0.00162574	0.00791194	1	0.33	0.67	chr3	+	RI	riExonStart_0base 88725994 riExonEnd 88726471 upstreamES 88725994 upstreamEE 88726179 downstreamES 88726279 downstreamEE 88726471	https://betsholtzlab.org/Publications/MouseKidenyOB/splicing/GE_Lean_6w_vs_GE_Obese_6w/RI/46_Rit1_chr3_88725995_88726179_+@chr3_88725995_88726471_+@chr3_88726280_88726471_+.pdf	Online figure
ENSMUSG00000039201.8	Tbc1d25	3.0836e-05	0.000367515	1	0	1	chrX	-	RI	riExonStart_0base 8156315 riExonEnd 8156778 upstreamES 8156315 upstreamEE 8156504 downstreamES 8156650 downstreamEE 8156778	https://betsholtzlab.org/Publications/MouseKidenyOB/splicing/GE_Lean_6w_vs_GE_Obese_6w/RI/47_Tbc1d25_chrX_8156651_8156778_-@chrX_8156316_8156778_-@chrX_8156316_8156504_-.pdf	Online figure
ENSMUSG00000038520.13	Tbc1d17	0.000632839	0.00362332	0	0.685	-0.685	chr7	-	RI	riExonStart_0base 44841982 riExonEnd 44842300 upstreamES 44841982 upstreamEE 44842099 downstreamES 44842185 downstreamEE 44842300	https://betsholtzlab.org/Publications/MouseKidenyOB/splicing/GE_Lean_6w_vs_GE_Obese_6w/RI/48_Tbc1d17_chr7_44842186_44842300_-@chr7_44841983_44842300_-@chr7_44841983_44842099_-.pdf	Online figure
ENSMUSG00000004896.15	Rrnad1	6.84141e-08	3.99539e-06	1	0	1	chr3	-	RI	riExonStart_0base 87924343 riExonEnd 87925431 upstreamES 87924343 upstreamEE 87924528 downstreamES 87924946 downstreamEE 87925431	https://betsholtzlab.org/Publications/MouseKidenyOB/splicing/GE_Lean_6w_vs_GE_Obese_6w/RI/49_Rrnad1_chr3_87924947_87925431_-@chr3_87924344_87925431_-@chr3_87924344_87924528_-.pdf	Online figure
ENSMUSG00000032525.13	Nktr	0.00356314	0.0145009	1	0.438	0.562	chr9	+	RI	riExonStart_0base 121727315 riExonEnd 121729680 upstreamES 121727315 upstreamEE 121727390 downstreamES 121729635 downstreamEE 121729680	https://betsholtzlab.org/Publications/MouseKidenyOB/splicing/GE_Lean_6w_vs_GE_Obese_6w/RI/50_Nktr_chr9_121727316_121727390_+@chr9_121727316_121729680_+@chr9_121729636_121729680_+.pdf	Online figure
ENSMUSG00000063870.11	Chd4	8.80264e-06	0.000166822	1	0	1	chr6	+	RI	riExonStart_0base 125120204 riExonEnd 125120556 upstreamES 125120204 upstreamEE 125120385 downstreamES 125120469 downstreamEE 125120556	https://betsholtzlab.org/Publications/MouseKidenyOB/splicing/GE_Lean_6w_vs_GE_Obese_6w/RI/51_Chd4_chr6_125120205_125120385_+@chr6_125120205_125120556_+@chr6_125120470_125120556_+.pdf	Online figure
ENSMUSG00000027134.4	Lpcat4	0.00489591	0.0190614	0	0.477	-0.477	chr2	+	RI	riExonStart_0base 112242475 riExonEnd 112242761 upstreamES 112242475 upstreamEE 112242588 downstreamES 112242700 downstreamEE 112242761	https://betsholtzlab.org/Publications/MouseKidenyOB/splicing/GE_Lean_6w_vs_GE_Obese_6w/RI/52_Lpcat4_chr2_112242476_112242588_+@chr2_112242476_112242761_+@chr2_112242701_112242761_+.pdf	Online figure
ENSMUSG00000089832.7	Shkbp1	3.17936e-06	7.57854e-05	0.412	0	0.412	chr7	-	RI	riExonStart_0base 27355400 riExonEnd 27355626 upstreamES 27355400 upstreamEE 27355446 downstreamES 27355572 downstreamEE 27355626	https://betsholtzlab.org/Publications/MouseKidenyOB/splicing/GE_Lean_6w_vs_GE_Obese_6w/RI/53_Shkbp1_chr7_27355573_27355626_-@chr7_27355401_27355626_-@chr7_27355401_27355446_-.pdf	Online figure
ENSMUSG00000085385.6	Snhg17	0.00165566	0.00799169	0.023	1	-0.977	chr2	-	RI	riExonStart_0base 158359181 riExonEnd 158360599 upstreamES 158359181 upstreamEE 158359331 downstreamES 158360463 downstreamEE 158360599	https://betsholtzlab.org/Publications/MouseKidenyOB/splicing/GE_Lean_6w_vs_GE_Obese_6w/RI/54_Snhg17_chr2_158360464_158360599_-@chr2_158359182_158360599_-@chr2_158359182_158359331_-.pdf	Online figure
ENSMUSG00000085385.6	Snhg17	0.013781	0.0420265	0.387	1	-0.613	chr2	-	RI	riExonStart_0base 158359181 riExonEnd 158360599 upstreamES 158359181 upstreamEE 158359331 downstreamES 158360526 downstreamEE 158360599	https://betsholtzlab.org/Publications/MouseKidenyOB/splicing/GE_Lean_6w_vs_GE_Obese_6w/RI/55_Snhg17_chr2_158360527_158360599_-@chr2_158359182_158360599_-@chr2_158359182_158359331_-.pdf	Online figure
ENSMUSG00000028180.17	Zranb2	1.86954e-07	8.08749e-06	1	0.027	0.973	chr3	+	RI	riExonStart_0base 157541699 riExonEnd 157543244 upstreamES 157541699 upstreamEE 157541869 downstreamES 157543157 downstreamEE 157543244	https://betsholtzlab.org/Publications/MouseKidenyOB/splicing/GE_Lean_6w_vs_GE_Obese_6w/RI/56_Zranb2_chr3_157541700_157541869_+@chr3_157541700_157543244_+@chr3_157543158_157543244_+.pdf	Online figure
ENSMUSG00000005506.15	Celf1	0.00178198	0.00849533	0.589	0	0.589	chr2	+	RI	riExonStart_0base 91013237 riExonEnd 91019497 upstreamES 91013237 upstreamEE 91013402 downstreamES 91013490 downstreamEE 91019497	https://betsholtzlab.org/Publications/MouseKidenyOB/splicing/GE_Lean_6w_vs_GE_Obese_6w/RI/57_Celf1_chr2_91013238_91013402_+@chr2_91013238_91019497_+@chr2_91013491_91019497_+.pdf	Online figure
ENSMUSG00000090626.8	Tex9	4.19883e-06	9.08191e-05	0	1	-1	chr9	-	RI	riExonStart_0base 72491738 riExonEnd 72491956 upstreamES 72491738 upstreamEE 72491818 downstreamES 72491925 downstreamEE 72491956	https://betsholtzlab.org/Publications/MouseKidenyOB/splicing/GE_Lean_6w_vs_GE_Obese_6w/RI/58_Tex9_chr9_72491926_72491956_-@chr9_72491739_72491956_-@chr9_72491739_72491818_-.pdf	Online figure
ENSMUSG00000027371.9	Fahd2a	0.000932022	0.00494819	0.146	1	-0.854	chr2	-	RI	riExonStart_0base 127438112 riExonEnd 127438569 upstreamES 127438112 upstreamEE 127438272 downstreamES 127438509 downstreamEE 127438569	https://betsholtzlab.org/Publications/MouseKidenyOB/splicing/GE_Lean_6w_vs_GE_Obese_6w/RI/59_Fahd2a_chr2_127438510_127438569_-@chr2_127438113_127438569_-@chr2_127438113_127438272_-.pdf	Online figure
ENSMUSG00000004561.13	Mettl17	7.63597e-05	0.000737092	1	0.293	0.707	chr14	+	RI	riExonStart_0base 51885150 riExonEnd 51885522 upstreamES 51885150 upstreamEE 51885304 downstreamES 51885403 downstreamEE 51885522	https://betsholtzlab.org/Publications/MouseKidenyOB/splicing/GE_Lean_6w_vs_GE_Obese_6w/RI/60_Mettl17_chr14_51885151_51885304_+@chr14_51885151_51885522_+@chr14_51885404_51885522_+.pdf	Online figure
ENSMUSG00000027381.15	Bcl2l11	0.00105179	0.00550893	0.453	1	-0.547	chr2	+	RI	riExonStart_0base 128128619 riExonEnd 128129014 upstreamES 128128619 upstreamEE 128128756 downstreamES 128128924 downstreamEE 128129014	https://betsholtzlab.org/Publications/MouseKidenyOB/splicing/GE_Lean_6w_vs_GE_Obese_6w/RI/61_Bcl2l11_chr2_128128620_128128756_+@chr2_128128620_128129014_+@chr2_128128925_128129014_+.pdf	Online figure
ENSMUSG00000027276.7	Jag1	0.0002017	0.00145423	0	1	-1	chr2	-	RI	riExonStart_0base 137084574 riExonEnd 137085155 upstreamES 137084574 upstreamEE 137084706 downstreamES 137084921 downstreamEE 137085155	https://betsholtzlab.org/Publications/MouseKidenyOB/splicing/GE_Lean_6w_vs_GE_Obese_6w/RI/62_Jag1_chr2_137084922_137085155_-@chr2_137084575_137085155_-@chr2_137084575_137084706_-.pdf	Online figure
ENSMUSG00000022756.14	Slc7a4	1.90211e-06	5.14644e-05	1	0	1	chr16	-	RI	riExonStart_0base 17573555 riExonEnd 17574586 upstreamES 17573555 upstreamEE 17573664 downstreamES 17573945 downstreamEE 17574586	https://betsholtzlab.org/Publications/MouseKidenyOB/splicing/GE_Lean_6w_vs_GE_Obese_6w/RI/63_Slc7a4_chr16_17573946_17574586_-@chr16_17573556_17574586_-@chr16_17573556_17573664_-.pdf	Online figure
ENSMUSG00000036054.14	Sugp2	0.000792403	0.00433758	0	0.532	-0.532	chr8	+	RI	riExonStart_0base 70260468 riExonEnd 70261317 upstreamES 70260468 upstreamEE 70260589 downstreamES 70261230 downstreamEE 70261317	https://betsholtzlab.org/Publications/MouseKidenyOB/splicing/GE_Lean_6w_vs_GE_Obese_6w/RI/64_Sugp2_chr8_70260469_70260589_+@chr8_70260469_70261317_+@chr8_70261231_70261317_+.pdf	Online figure
ENSMUSG00000030263.12	Lrmp	7.32695e-05	0.000719149	1	0.27	0.73	chr6	+	RI	riExonStart_0base 145137459 riExonEnd 145138086 upstreamES 145137459 upstreamEE 145137607 downstreamES 145138045 downstreamEE 145138086	https://betsholtzlab.org/Publications/MouseKidenyOB/splicing/GE_Lean_6w_vs_GE_Obese_6w/RI/65_Lrmp_chr6_145137460_145137607_+@chr6_145137460_145138086_+@chr6_145138046_145138086_+.pdf	Online figure
ENSMUSG00000022621.15	Rabl2	9.80342e-05	0.000869386	0.133	1	-0.867	chr15	-	RI	riExonStart_0base 89583909 riExonEnd 89584390 upstreamES 89583909 upstreamEE 89584007 downstreamES 89584278 downstreamEE 89584390	https://betsholtzlab.org/Publications/MouseKidenyOB/splicing/GE_Lean_6w_vs_GE_Obese_6w/RI/66_Rabl2_chr15_89584279_89584390_-@chr15_89583910_89584390_-@chr15_89583910_89584007_-.pdf	Online figure
ENSMUSG00000027569.14	Mrgbp	0.0020479	0.00949185	0.406	1	-0.594	chr2	+	RI	riExonStart_0base 180584405 riExonEnd 180584871 upstreamES 180584405 upstreamEE 180584487 downstreamES 180584796 downstreamEE 180584871	https://betsholtzlab.org/Publications/MouseKidenyOB/splicing/GE_Lean_6w_vs_GE_Obese_6w/RI/67_Mrgbp_chr2_180584406_180584487_+@chr2_180584406_180584871_+@chr2_180584797_180584871_+.pdf	Online figure
ENSMUSG00000005150.15	Wdr83	5.32035e-05	0.000554718	0.4	1	-0.6	chr8	-	RI	riExonStart_0base 85079788 riExonEnd 85080225 upstreamES 85079788 upstreamEE 85079837 downstreamES 85080119 downstreamEE 85080225	https://betsholtzlab.org/Publications/MouseKidenyOB/splicing/GE_Lean_6w_vs_GE_Obese_6w/RI/68_Wdr83_chr8_85080120_85080225_-@chr8_85079789_85080225_-@chr8_85079789_85079837_-.pdf	Online figure
ENSMUSG00000027615.13	Hps3	0.000185395	0.00137052	1	0.331	0.669	chr3	-	RI	riExonStart_0base 20030313 riExonEnd 20030805 upstreamES 20030313 upstreamEE 20030409 downstreamES 20030558 downstreamEE 20030805	https://betsholtzlab.org/Publications/MouseKidenyOB/splicing/GE_Lean_6w_vs_GE_Obese_6w/RI/69_Hps3_chr3_20030559_20030805_-@chr3_20030314_20030805_-@chr3_20030314_20030409_-.pdf	Online figure
ENSMUSG00000028467.14	Gba2	0.00210878	0.00969706	0.565	0.16	0.405	chr4	-	RI	riExonStart_0base 43569488 riExonEnd 43569955 upstreamES 43569488 upstreamEE 43569661 downstreamES 43569829 downstreamEE 43569955	https://betsholtzlab.org/Publications/MouseKidenyOB/splicing/GE_Lean_6w_vs_GE_Obese_6w/RI/70_Gba2_chr4_43569830_43569955_-@chr4_43569489_43569955_-@chr4_43569489_43569661_-.pdf	Online figure
ENSMUSG00000030166.13	Rad52	0.0014771	0.00734151	0.582	1	-0.418	chr6	+	RI	riExonStart_0base 119918586 riExonEnd 119919077 upstreamES 119918586 upstreamEE 119918786 downstreamES 119918925 downstreamEE 119919077	https://betsholtzlab.org/Publications/MouseKidenyOB/splicing/GE_Lean_6w_vs_GE_Obese_6w/RI/71_Rad52_chr6_119918587_119918786_+@chr6_119918587_119919077_+@chr6_119918926_119919077_+.pdf	Online figure
ENSMUSG00000001082.11	Mfsd10	4.39551e-05	0.000484335	0.831	0.14	0.691	chr5	-	RI	riExonStart_0base 34634590 riExonEnd 34634962 upstreamES 34634590 upstreamEE 34634699 downstreamES 34634850 downstreamEE 34634962	https://betsholtzlab.org/Publications/MouseKidenyOB/splicing/GE_Lean_6w_vs_GE_Obese_6w/RI/72_Mfsd10_chr5_34634851_34634962_-@chr5_34634591_34634962_-@chr5_34634591_34634699_-.pdf	Online figure
ENSMUSG00000098234.6	Snhg6	0.000180353	0.00134174	1	0.181	0.819	chr1	-	RI	riExonStart_0base 9942024 riExonEnd 9942391 upstreamES 9942024 upstreamEE 9942149 downstreamES 9942322 downstreamEE 9942391	https://betsholtzlab.org/Publications/MouseKidenyOB/splicing/GE_Lean_6w_vs_GE_Obese_6w/RI/73_Snhg6_chr1_9942323_9942391_-@chr1_9942025_9942391_-@chr1_9942025_9942149_-.pdf	Online figure
ENSMUSG00000019338.12	Zfp687	3.15415e-05	0.000368405	0	1	-1	chr3	-	RI	riExonStart_0base 95006831 riExonEnd 95008213 upstreamES 95006831 upstreamEE 95007966 downstreamES 95008071 downstreamEE 95008213	https://betsholtzlab.org/Publications/MouseKidenyOB/splicing/GE_Lean_6w_vs_GE_Obese_6w/RI/74_Zfp687_chr3_95008072_95008213_-@chr3_95006832_95008213_-@chr3_95006832_95007966_-.pdf	Online figure
ENSMUSG00000019338.12	Zfp687	3.80739e-05	0.000435984	0	1	-1	chr3	-	RI	riExonStart_0base 95008584 riExonEnd 95009238 upstreamES 95008584 upstreamEE 95008917 downstreamES 95009075 downstreamEE 95009238	https://betsholtzlab.org/Publications/MouseKidenyOB/splicing/GE_Lean_6w_vs_GE_Obese_6w/RI/75_Zfp687_chr3_95009076_95009238_-@chr3_95008585_95009238_-@chr3_95008585_95008917_-.pdf	Online figure
ENSMUSG00000092607.8	Scnm1	0	0	0.562	0	0.562	chr3	-	RI	riExonStart_0base 95133199 riExonEnd 95133628 upstreamES 95133199 upstreamEE 95133288 downstreamES 95133557 downstreamEE 95133628	https://betsholtzlab.org/Publications/MouseKidenyOB/splicing/GE_Lean_6w_vs_GE_Obese_6w/RI/76_Scnm1_chr3_95133558_95133628_-@chr3_95133200_95133628_-@chr3_95133200_95133288_-.pdf	Online figure
ENSMUSG00000002346.15	Slc25a42	8.86223e-06	0.000166822	1	0	1	chr8	-	RI	riExonStart_0base 70188832 riExonEnd 70189577 upstreamES 70188832 upstreamEE 70188949 downstreamES 70189410 downstreamEE 70189577	https://betsholtzlab.org/Publications/MouseKidenyOB/splicing/GE_Lean_6w_vs_GE_Obese_6w/RI/77_Slc25a42_chr8_70189411_70189577_-@chr8_70188833_70189577_-@chr8_70188833_70188949_-.pdf	Online figure
ENSMUSG00000045411.15	2410002F23Rik	1.95739e-05	0.00027217	0.217	1	-0.783	chr7	+	RI	riExonStart_0base 44247250 riExonEnd 44248295 upstreamES 44247250 upstreamEE 44247416 downstreamES 44248251 downstreamEE 44248295	https://betsholtzlab.org/Publications/MouseKidenyOB/splicing/GE_Lean_6w_vs_GE_Obese_6w/RI/78_2410002F23Rik_chr7_44247251_44247416_+@chr7_44247251_44248295_+@chr7_44248252_44248295_+.pdf	Online figure
ENSMUSG00000037447.15	Arid5a	2.83801e-05	0.000348926	0.083	0.603	-0.52	chr1	+	RI	riExonStart_0base 36316208 riExonEnd 36318181 upstreamES 36316208 upstreamEE 36316327 downstreamES 36318083 downstreamEE 36318181	https://betsholtzlab.org/Publications/MouseKidenyOB/splicing/GE_Lean_6w_vs_GE_Obese_6w/RI/79_Arid5a_chr1_36316209_36316327_+@chr1_36316209_36318181_+@chr1_36318084_36318181_+.pdf	Online figure
ENSMUSG00000039176.16	Polg	5.92539e-05	0.000601813	0	0.659	-0.659	chr7	-	RI	riExonStart_0base 79451859 riExonEnd 79452229 upstreamES 79451859 upstreamEE 79452028 downstreamES 79452106 downstreamEE 79452229	https://betsholtzlab.org/Publications/MouseKidenyOB/splicing/GE_Lean_6w_vs_GE_Obese_6w/RI/80_Polg_chr7_79452107_79452229_-@chr7_79451860_79452229_-@chr7_79451860_79452028_-.pdf	Online figure
ENSMUSG00000030741.14	Spns1	0.00845632	0.0292218	1	0.583	0.417	chr7	-	RI	riExonStart_0base 126373769 riExonEnd 126375203 upstreamES 126373769 upstreamEE 126373836 downstreamES 126375066 downstreamEE 126375203	https://betsholtzlab.org/Publications/MouseKidenyOB/splicing/GE_Lean_6w_vs_GE_Obese_6w/RI/81_Spns1_chr7_126375067_126375203_-@chr7_126373770_126375203_-@chr7_126373770_126373836_-.pdf	Online figure
ENSMUSG00000042606.8	Hirip3	0.00587885	0.0220788	0.502	1	-0.498	chr7	+	RI	riExonStart_0base 126862599 riExonEnd 126862926 upstreamES 126862599 upstreamEE 126862720 downstreamES 126862817 downstreamEE 126862926	https://betsholtzlab.org/Publications/MouseKidenyOB/splicing/GE_Lean_6w_vs_GE_Obese_6w/RI/82_Hirip3_chr7_126862600_126862720_+@chr7_126862600_126862926_+@chr7_126862818_126862926_+.pdf	Online figure
ENSMUSG00000030846.14	Tial1	9.43634e-11	1.10216e-08	0	1	-1	chr7	-	RI	riExonStart_0base 128443806 riExonEnd 128444404 upstreamES 128443806 upstreamEE 128443946 downstreamES 128444280 downstreamEE 128444404	https://betsholtzlab.org/Publications/MouseKidenyOB/splicing/GE_Lean_6w_vs_GE_Obese_6w/RI/83_Tial1_chr7_128444281_128444404_-@chr7_128443807_128444404_-@chr7_128443807_128443946_-.pdf	Online figure
ENSMUSG00000030979.11	Uros	1.32326e-07	5.94448e-06	0	1	-1	chr7	-	RI	riExonStart_0base 133690507 riExonEnd 133691166 upstreamES 133690507 upstreamEE 133690593 downstreamES 133691085 downstreamEE 133691166	https://betsholtzlab.org/Publications/MouseKidenyOB/splicing/GE_Lean_6w_vs_GE_Obese_6w/RI/84_Uros_chr7_133691086_133691166_-@chr7_133690508_133691166_-@chr7_133690508_133690593_-.pdf	Online figure
ENSMUSG00000059540.14	Tcea2	9.41097e-06	0.000166822	0.574	0	0.574	chr2	+	RI	riExonStart_0base 181686189 riExonEnd 181686752 upstreamES 181686189 upstreamEE 181686246 downstreamES 181686597 downstreamEE 181686752	https://betsholtzlab.org/Publications/MouseKidenyOB/splicing/GE_Lean_6w_vs_GE_Obese_6w/RI/85_Tcea2_chr2_181686190_181686246_+@chr2_181686190_181686752_+@chr2_181686598_181686752_+.pdf	Online figure
ENSMUSG00000094870.6	Zfp131	0.0169729	0.049685	0.394	1	-0.606	chr13	-	RI	riExonStart_0base 119775766 riExonEnd 119776449 upstreamES 119775766 upstreamEE 119775989 downstreamES 119776091 downstreamEE 119776449	https://betsholtzlab.org/Publications/MouseKidenyOB/splicing/GE_Lean_6w_vs_GE_Obese_6w/RI/86_Zfp131_chr13_119776092_119776449_-@chr13_119775767_119776449_-@chr13_119775767_119775989_-.pdf	Online figure
ENSMUSG00000055681.13	Cope	0.000140879	0.00114269	0.501	1	-0.499	chr8	+	RI	riExonStart_0base 70304633 riExonEnd 70306651 upstreamES 70304633 upstreamEE 70304696 downstreamES 70306498 downstreamEE 70306651	https://betsholtzlab.org/Publications/MouseKidenyOB/splicing/GE_Lean_6w_vs_GE_Obese_6w/RI/87_Cope_chr8_70304634_70304696_+@chr8_70304634_70306651_+@chr8_70306499_70306651_+.pdf	Online figure
ENSMUSG00000001909.14	Trmt1	9.2595e-07	3.11381e-05	0	1	-1	chr8	+	RI	riExonStart_0base 84690516 riExonEnd 84690947 upstreamES 84690516 upstreamEE 84690572 downstreamES 84690801 downstreamEE 84690947	https://betsholtzlab.org/Publications/MouseKidenyOB/splicing/GE_Lean_6w_vs_GE_Obese_6w/RI/88_Trmt1_chr8_84690517_84690572_+@chr8_84690517_84690947_+@chr8_84690802_84690947_+.pdf	Online figure
ENSMUSG00000003808.17	Farsa	0.010715	0.0348609	0.662	0.214	0.448	chr8	+	RI	riExonStart_0base 84867548 riExonEnd 84867918 upstreamES 84867548 upstreamEE 84867648 downstreamES 84867749 downstreamEE 84867918	https://betsholtzlab.org/Publications/MouseKidenyOB/splicing/GE_Lean_6w_vs_GE_Obese_6w/RI/89_Farsa_chr8_84867549_84867648_+@chr8_84867549_84867918_+@chr8_84867750_84867918_+.pdf	Online figure
ENSMUSG00000014778.9	Fhod1	8.58099e-05	0.000797251	0.04	1	-0.96	chr8	-	RI	riExonStart_0base 105331641 riExonEnd 105332192 upstreamES 105331641 upstreamEE 105331824 downstreamES 105332036 downstreamEE 105332192	https://betsholtzlab.org/Publications/MouseKidenyOB/splicing/GE_Lean_6w_vs_GE_Obese_6w/RI/90_Fhod1_chr8_105332037_105332192_-@chr8_105331642_105332192_-@chr8_105331642_105331824_-.pdf	Online figure
ENSMUSG00000031812.15	Map1lc3b	0.00520835	0.0198155	1	0.291	0.709	chr8	+	RI	riExonStart_0base 121593489 riExonEnd 121596092 upstreamES 121593489 upstreamEE 121593650 downstreamES 121595985 downstreamEE 121596092	https://betsholtzlab.org/Publications/MouseKidenyOB/splicing/GE_Lean_6w_vs_GE_Obese_6w/RI/91_Map1lc3b_chr8_121593490_121593650_+@chr8_121593490_121596092_+@chr8_121595986_121596092_+.pdf	Online figure
ENSMUSG00000001065.13	Zfp276	0.000216083	0.00153893	0.715	0.059	0.656	chr8	+	RI	riExonStart_0base 123264815 riExonEnd 123265070 upstreamES 123264815 upstreamEE 123264926 downstreamES 123264994 downstreamEE 123265070	https://betsholtzlab.org/Publications/MouseKidenyOB/splicing/GE_Lean_6w_vs_GE_Obese_6w/RI/92_Zfp276_chr8_123264816_123264926_+@chr8_123264816_123265070_+@chr8_123264995_123265070_+.pdf	Online figure
ENSMUSG00000032103.9	Pus3	0.000825626	0.00442354	0	0.465	-0.465	chr9	+	RI	riExonStart_0base 35564783 riExonEnd 35565855 upstreamES 35564783 upstreamEE 35565197 downstreamES 35565289 downstreamEE 35565855	https://betsholtzlab.org/Publications/MouseKidenyOB/splicing/GE_Lean_6w_vs_GE_Obese_6w/RI/93_Pus3_chr9_35564784_35565197_+@chr9_35564784_35565855_+@chr9_35565290_35565855_+.pdf	Online figure
ENSMUSG00000042790.14	Rnf214	0.000278977	0.00188776	1	0.016	0.984	chr9	-	RI	riExonStart_0base 45866565 riExonEnd 45867632 upstreamES 45866565 upstreamEE 45866661 downstreamES 45867499 downstreamEE 45867632	https://betsholtzlab.org/Publications/MouseKidenyOB/splicing/GE_Lean_6w_vs_GE_Obese_6w/RI/94_Rnf214_chr9_45867500_45867632_-@chr9_45866566_45867632_-@chr9_45866566_45866661_-.pdf	Online figure
ENSMUSG00000037845.13	Fdxacb1	0.00339616	0.0139183	1	0.423	0.577	chr9	+	RI	riExonStart_0base 50770109 riExonEnd 50770790 upstreamES 50770109 upstreamEE 50770313 downstreamES 50770631 downstreamEE 50770790	https://betsholtzlab.org/Publications/MouseKidenyOB/splicing/GE_Lean_6w_vs_GE_Obese_6w/RI/95_Fdxacb1_chr9_50770110_50770313_+@chr9_50770110_50770790_+@chr9_50770632_50770790_+.pdf	Online figure
ENSMUSG00000059183.11	Mtfmt	3.29305e-08	2.26252e-06	1	0	1	chr9	+	RI	riExonStart_0base 65440345 riExonEnd 65441688 upstreamES 65440345 upstreamEE 65440448 downstreamES 65441612 downstreamEE 65441688	https://betsholtzlab.org/Publications/MouseKidenyOB/splicing/GE_Lean_6w_vs_GE_Obese_6w/RI/96_Mtfmt_chr9_65440346_65440448_+@chr9_65440346_65441688_+@chr9_65441613_65441688_+.pdf	Online figure
ENSMUSG00000047909.10	Ankrd16	3.57177e-06	8.18006e-05	0.075	0.602	-0.527	chr2	+	RI	riExonStart_0base 11781476 riExonEnd 11783756 upstreamES 11781476 upstreamEE 11781519 downstreamES 11783640 downstreamEE 11783756	https://betsholtzlab.org/Publications/MouseKidenyOB/splicing/GE_Lean_6w_vs_GE_Obese_6w/RI/97_Ankrd16_chr2_11781477_11781519_+@chr2_11781477_11783756_+@chr2_11783641_11783756_+.pdf	Online figure
ENSMUSG00000022999.13	Lmbr1l	0.0036667	0.0148705	0.046	0.605	-0.559	chr15	-	RI	riExonStart_0base 98908519 riExonEnd 98908759 upstreamES 98908519 upstreamEE 98908596 downstreamES 98908675 downstreamEE 98908759	https://betsholtzlab.org/Publications/MouseKidenyOB/splicing/GE_Lean_6w_vs_GE_Obese_6w/RI/98_Lmbr1l_chr15_98908676_98908759_-@chr15_98908520_98908759_-@chr15_98908520_98908596_-.pdf	Online figure
ENSMUSG00000058503.10	Fam133b	0.00381846	0.0153792	0.166	1	-0.834	chr5	+	RI	riExonStart_0base 3558660 riExonEnd 3559159 upstreamES 3558660 upstreamEE 3558693 downstreamES 3559137 downstreamEE 3559159	https://betsholtzlab.org/Publications/MouseKidenyOB/splicing/GE_Lean_6w_vs_GE_Obese_6w/RI/99_Fam133b_chr5_3558661_3558693_+@chr5_3558661_3559159_+@chr5_3559138_3559159_+.pdf	Online figure
ENSMUSG00000013858.13	Tmem259	3.13182e-05	0.000368405	0	1	-1	chr10	-	RI	riExonStart_0base 79977962 riExonEnd 79978320 upstreamES 79977962 upstreamEE 79978062 downstreamES 79978187 downstreamEE 79978320	https://betsholtzlab.org/Publications/MouseKidenyOB/splicing/GE_Lean_6w_vs_GE_Obese_6w/RI/100_Tmem259_chr10_79978188_79978320_-@chr10_79977963_79978320_-@chr10_79977963_79978062_-.pdf	Online figure
ENSMUSG00000020156.15	Mum1	0.00133132	0.00676078	0.335	1	-0.665	chr10	+	RI	riExonStart_0base 80236110 riExonEnd 80238920 upstreamES 80236110 upstreamEE 80236181 downstreamES 80238859 downstreamEE 80238920	https://betsholtzlab.org/Publications/MouseKidenyOB/splicing/GE_Lean_6w_vs_GE_Obese_6w/RI/101_Mum1_chr10_80236111_80236181_+@chr10_80236111_80238920_+@chr10_80238860_80238920_+.pdf	Online figure
ENSMUSG00000067369.11	Trmt2b	0.00338355	0.0139154	0	0.473	-0.473	chrX	-	RI	riExonStart_0base 134238142 riExonEnd 134238586 upstreamES 134238142 upstreamEE 134238242 downstreamES 134238466 downstreamEE 134238586	https://betsholtzlab.org/Publications/MouseKidenyOB/splicing/GE_Lean_6w_vs_GE_Obese_6w/RI/102_Trmt2b_chrX_134238467_134238586_-@chrX_134238143_134238586_-@chrX_134238143_134238242_-.pdf	Online figure
ENSMUSG00000020883.17	Fbxl20	0.000135289	0.0011128	1	0.151	0.849	chr11	-	RI	riExonStart_0base 98095132 riExonEnd 98097059 upstreamES 98095132 upstreamEE 98095193 downstreamES 98096928 downstreamEE 98097059	https://betsholtzlab.org/Publications/MouseKidenyOB/splicing/GE_Lean_6w_vs_GE_Obese_6w/RI/103_Fbxl20_chr11_98096929_98097059_-@chr11_98095133_98097059_-@chr11_98095133_98095193_-.pdf	Online figure
ENSMUSG00000034083.15	Ccdc174	1.2826e-05	0.000205216	0.059	1	-0.941	chr6	+	RI	riExonStart_0base 91885347 riExonEnd 91888250 upstreamES 91885347 upstreamEE 91885406 downstreamES 91888069 downstreamEE 91888250	https://betsholtzlab.org/Publications/MouseKidenyOB/splicing/GE_Lean_6w_vs_GE_Obese_6w/RI/104_Ccdc174_chr6_91885348_91885406_+@chr6_91885348_91888250_+@chr6_91888070_91888250_+.pdf	Online figure
ENSMUSG00000038102.14	Trappc11	0.000650115	0.00368609	0.032	0.59	-0.558	chr8	-	RI	riExonStart_0base 47513282 riExonEnd 47513808 upstreamES 47513282 upstreamEE 47513428 downstreamES 47513753 downstreamEE 47513808	https://betsholtzlab.org/Publications/MouseKidenyOB/splicing/GE_Lean_6w_vs_GE_Obese_6w/RI/105_Trappc11_chr8_47513754_47513808_-@chr8_47513283_47513808_-@chr8_47513283_47513428_-.pdf	Online figure
ENSMUSG00000036819.13	Jmjd4	0.00267956	0.0117308	0	1	-1	chr11	+	RI	riExonStart_0base 59450674 riExonEnd 59453645 upstreamES 59450674 upstreamEE 59450840 downstreamES 59453510 downstreamEE 59453645	https://betsholtzlab.org/Publications/MouseKidenyOB/splicing/GE_Lean_6w_vs_GE_Obese_6w/RI/106_Jmjd4_chr11_59450675_59450840_+@chr11_59450675_59453645_+@chr11_59453511_59453645_+.pdf	Online figure
ENSMUSG00000001034.16	Mapk7	1.66512e-05	0.000243107	1	0	1	chr11	-	RI	riExonStart_0base 61492903 riExonEnd 61494266 upstreamES 61492903 upstreamEE 61493069 downstreamES 61493523 downstreamEE 61494266	https://betsholtzlab.org/Publications/MouseKidenyOB/splicing/GE_Lean_6w_vs_GE_Obese_6w/RI/107_Mapk7_chr11_61493524_61494266_-@chr11_61492904_61494266_-@chr11_61492904_61493069_-.pdf	Online figure
ENSMUSG00000060216.14	Arrb2	6.47381e-05	0.000651846	1	0.076	0.924	chr11	+	RI	riExonStart_0base 70437943 riExonEnd 70438391 upstreamES 70437943 upstreamEE 70438028 downstreamES 70438318 downstreamEE 70438391	https://betsholtzlab.org/Publications/MouseKidenyOB/splicing/GE_Lean_6w_vs_GE_Obese_6w/RI/108_Arrb2_chr11_70437944_70438028_+@chr11_70437944_70438391_+@chr11_70438319_70438391_+.pdf	Online figure
ENSMUSG00000019194.13	Scn1b	0.00263151	0.0115985	0.643	0.083	0.56	chr7	-	RI	riExonStart_0base 31116523 riExonEnd 31117295 upstreamES 31116523 upstreamEE 31117136 downstreamES 31117223 downstreamEE 31117295	https://betsholtzlab.org/Publications/MouseKidenyOB/splicing/GE_Lean_6w_vs_GE_Obese_6w/RI/109_Scn1b_chr7_31117224_31117295_-@chr7_31116524_31117295_-@chr7_31116524_31117136_-.pdf	Online figure
ENSMUSG00000020692.13	Nle1	3.61841e-05	0.000418446	1	0.055	0.945	chr11	-	RI	riExonStart_0base 82902994 riExonEnd 82904136 upstreamES 82902994 upstreamEE 82903133 downstreamES 82904089 downstreamEE 82904136	https://betsholtzlab.org/Publications/MouseKidenyOB/splicing/GE_Lean_6w_vs_GE_Obese_6w/RI/110_Nle1_chr11_82904090_82904136_-@chr11_82902995_82904136_-@chr11_82902995_82903133_-.pdf	Online figure
ENSMUSG00000025737.5	Wdr24	0.000462152	0.00281142	1	0.17	0.83	chr17	+	RI	riExonStart_0base 25827234 riExonEnd 25827532 upstreamES 25827234 upstreamEE 25827356 downstreamES 25827427 downstreamEE 25827532	https://betsholtzlab.org/Publications/MouseKidenyOB/splicing/GE_Lean_6w_vs_GE_Obese_6w/RI/111_Wdr24_chr17_25827235_25827356_+@chr17_25827235_25827532_+@chr17_25827428_25827532_+.pdf	Online figure
ENSMUSG00000008855.16	Hdac5	0.000159019	0.00123003	1	0.324	0.676	chr11	-	RI	riExonStart_0base 102196538 riExonEnd 102197436 upstreamES 102196538 upstreamEE 102196672 downstreamES 102197338 downstreamEE 102197436	https://betsholtzlab.org/Publications/MouseKidenyOB/splicing/GE_Lean_6w_vs_GE_Obese_6w/RI/112_Hdac5_chr11_102197339_102197436_-@chr11_102196539_102197436_-@chr11_102196539_102196672_-.pdf	Online figure
ENSMUSG00000025142.16	Aspscr1	0.00884704	0.0301264	0.639	0.12	0.519	chr11	+	RI	riExonStart_0base 120708929 riExonEnd 120709246 upstreamES 120708929 upstreamEE 120708999 downstreamES 120709070 downstreamEE 120709246	https://betsholtzlab.org/Publications/MouseKidenyOB/splicing/GE_Lean_6w_vs_GE_Obese_6w/RI/113_Aspscr1_chr11_120708930_120708999_+@chr11_120708930_120709246_+@chr11_120709071_120709246_+.pdf	Online figure
ENSMUSG00000032594.10	Ip6k1	2.40312e-05	0.000305092	0	1	-1	chr9	+	RI	riExonStart_0base 108044724 riExonEnd 108045313 upstreamES 108044724 upstreamEE 108044900 downstreamES 108045245 downstreamEE 108045313	https://betsholtzlab.org/Publications/MouseKidenyOB/splicing/GE_Lean_6w_vs_GE_Obese_6w/RI/114_Ip6k1_chr9_108044725_108044900_+@chr9_108044725_108045313_+@chr9_108045246_108045313_+.pdf	Online figure
ENSMUSG00000018599.5	Mief2	2.92737e-05	0.000356163	1	0	1	chr11	+	RI	riExonStart_0base 60730282 riExonEnd 60730792 upstreamES 60730282 upstreamEE 60730435 downstreamES 60730629 downstreamEE 60730792	https://betsholtzlab.org/Publications/MouseKidenyOB/splicing/GE_Lean_6w_vs_GE_Obese_6w/RI/115_Mief2_chr11_60730283_60730435_+@chr11_60730283_60730792_+@chr11_60730630_60730792_+.pdf	Online figure
ENSMUSG00000014850.14	Msh3	3.8305e-06	8.53226e-05	1	0	1	chr13	-	RI	riExonStart_0base 92342245 riExonEnd 92345101 upstreamES 92342245 upstreamEE 92342412 downstreamES 92344955 downstreamEE 92345101	https://betsholtzlab.org/Publications/MouseKidenyOB/splicing/GE_Lean_6w_vs_GE_Obese_6w/RI/116_Msh3_chr13_92344956_92345101_-@chr13_92342246_92345101_-@chr13_92342246_92342412_-.pdf	Online figure
ENSMUSG00000000901.14	Mmp11	0.00141401	0.007094	1	0.322	0.678	chr10	-	RI	riExonStart_0base 75923221 riExonEnd 75924115 upstreamES 75923221 upstreamEE 75923490 downstreamES 75923958 downstreamEE 75924115	https://betsholtzlab.org/Publications/MouseKidenyOB/splicing/GE_Lean_6w_vs_GE_Obese_6w/RI/117_Mmp11_chr10_75923959_75924115_-@chr10_75923222_75924115_-@chr10_75923222_75923490_-.pdf	Online figure
ENSMUSG00000021773.9	Comtd1	0.0045354	0.0178964	0.666	0.074	0.592	chr14	-	RI	riExonStart_0base 21847872 riExonEnd 21848120 upstreamES 21847872 upstreamEE 21847927 downstreamES 21848001 downstreamEE 21848120	https://betsholtzlab.org/Publications/MouseKidenyOB/splicing/GE_Lean_6w_vs_GE_Obese_6w/RI/118_Comtd1_chr14_21848002_21848120_-@chr14_21847873_21848120_-@chr14_21847873_21847927_-.pdf	Online figure
ENSMUSG00000021868.6	Ppif	6.09819e-06	0.000124959	0	1	-1	chr14	+	RI	riExonStart_0base 25696003 riExonEnd 25698341 upstreamES 25696003 upstreamEE 25696092 downstreamES 25698265 downstreamEE 25698341	https://betsholtzlab.org/Publications/MouseKidenyOB/splicing/GE_Lean_6w_vs_GE_Obese_6w/RI/119_Ppif_chr14_25696004_25696092_+@chr14_25696004_25698341_+@chr14_25698266_25698341_+.pdf	Online figure
ENSMUSG00000019518.9	Ap4m1	0.000279608	0.00188776	1	0.017	0.983	chr5	+	RI	riExonStart_0base 138172348 riExonEnd 138172893 upstreamES 138172348 upstreamEE 138172437 downstreamES 138172786 downstreamEE 138172893	https://betsholtzlab.org/Publications/MouseKidenyOB/splicing/GE_Lean_6w_vs_GE_Obese_6w/RI/120_Ap4m1_chr5_138172349_138172437_+@chr5_138172349_138172893_+@chr5_138172787_138172893_+.pdf	Online figure
ENSMUSG00000022558.14	Mroh1	2.22588e-05	0.000293149	0	1	-1	chr15	+	RI	riExonStart_0base 76446515 riExonEnd 76447365 upstreamES 76446515 upstreamEE 76446681 downstreamES 76447168 downstreamEE 76447365	https://betsholtzlab.org/Publications/MouseKidenyOB/splicing/GE_Lean_6w_vs_GE_Obese_6w/RI/121_Mroh1_chr15_76446516_76446681_+@chr15_76446516_76447365_+@chr15_76447169_76447365_+.pdf	Online figure
ENSMUSG00000036452.16	Arhgap26	7.18683e-05	0.000711374	0	0.762	-0.762	chr18	+	RI	riExonStart_0base 39357552 riExonEnd 39357828 upstreamES 39357552 upstreamEE 39357663 downstreamES 39357798 downstreamEE 39357828	https://betsholtzlab.org/Publications/MouseKidenyOB/splicing/GE_Lean_6w_vs_GE_Obese_6w/RI/122_Arhgap26_chr18_39357553_39357663_+@chr18_39357553_39357828_+@chr18_39357799_39357828_+.pdf	Online figure
ENSMUSG00000038335.12	Tsr1	0.00289299	0.0124687	0.531	1	-0.469	chr11	+	RI	riExonStart_0base 74907823 riExonEnd 74908120 upstreamES 74907823 upstreamEE 74907964 downstreamES 74908045 downstreamEE 74908120	https://betsholtzlab.org/Publications/MouseKidenyOB/splicing/GE_Lean_6w_vs_GE_Obese_6w/RI/123_Tsr1_chr11_74907824_74907964_+@chr11_74907824_74908120_+@chr11_74908046_74908120_+.pdf	Online figure
ENSMUSG00000022106.13	Rcbtb2	2.23376e-05	0.000293149	0	1	-1	chr14	+	RI	riExonStart_0base 73154314 riExonEnd 73154894 upstreamES 73154314 upstreamEE 73154410 downstreamES 73154830 downstreamEE 73154894	https://betsholtzlab.org/Publications/MouseKidenyOB/splicing/GE_Lean_6w_vs_GE_Obese_6w/RI/124_Rcbtb2_chr14_73154315_73154410_+@chr14_73154315_73154894_+@chr14_73154831_73154894_+.pdf	Online figure
ENSMUSG00000033819.14	Ppp1r16a	2.27271e-05	0.000294947	1	0.149	0.851	chr15	+	RI	riExonStart_0base 76693013 riExonEnd 76693724 upstreamES 76693013 upstreamEE 76693138 downstreamES 76693594 downstreamEE 76693724	https://betsholtzlab.org/Publications/MouseKidenyOB/splicing/GE_Lean_6w_vs_GE_Obese_6w/RI/125_Ppp1r16a_chr15_76693014_76693138_+@chr15_76693014_76693724_+@chr15_76693595_76693724_+.pdf	Online figure
ENSMUSG00000039994.14	Timeless	8.31949e-05	0.000783642	0.025	1	-0.975	chr10	+	RI	riExonStart_0base 128239833 riExonEnd 128240291 upstreamES 128239833 upstreamEE 128239997 downstreamES 128240137 downstreamEE 128240291	https://betsholtzlab.org/Publications/MouseKidenyOB/splicing/GE_Lean_6w_vs_GE_Obese_6w/RI/126_Timeless_chr10_128239834_128239997_+@chr10_128239834_128240291_+@chr10_128240138_128240291_+.pdf	Online figure
ENSMUSG00000036529.16	Sbf1	4.78639e-05	0.000512891	0	0.751	-0.751	chr15	-	RI	riExonStart_0base 89301842 riExonEnd 89302377 upstreamES 89301842 upstreamEE 89301970 downstreamES 89302181 downstreamEE 89302377	https://betsholtzlab.org/Publications/MouseKidenyOB/splicing/GE_Lean_6w_vs_GE_Obese_6w/RI/127_Sbf1_chr15_89302182_89302377_-@chr15_89301843_89302377_-@chr15_89301843_89301970_-.pdf	Online figure
ENSMUSG00000033237.17	Arid2	7.92998e-08	4.2101e-06	0.753	0	0.753	chr15	+	RI	riExonStart_0base 96391103 riExonEnd 96392478 upstreamES 96391103 upstreamEE 96391189 downstreamES 96392354 downstreamEE 96392478	https://betsholtzlab.org/Publications/MouseKidenyOB/splicing/GE_Lean_6w_vs_GE_Obese_6w/RI/128_Arid2_chr15_96391104_96391189_+@chr15_96391104_96392478_+@chr15_96392355_96392478_+.pdf	Online figure
ENSMUSG00000004071.11	Cdip1	0.00920197	0.0310633	0.576	1	-0.424	chr16	-	RI	riExonStart_0base 4768744 riExonEnd 4769795 upstreamES 4768744 upstreamEE 4768967 downstreamES 4769639 downstreamEE 4769795	https://betsholtzlab.org/Publications/MouseKidenyOB/splicing/GE_Lean_6w_vs_GE_Obese_6w/RI/129_Cdip1_chr16_4769640_4769795_-@chr16_4768745_4769795_-@chr16_4768745_4768967_-.pdf	Online figure
ENSMUSG00000055692.17	Tmem191c	0.000533368	0.00314633	0.736	0	0.736	chr16	+	RI	riExonStart_0base 17276633 riExonEnd 17277039 upstreamES 17276633 upstreamEE 17276887 downstreamES 17276961 downstreamEE 17277039	https://betsholtzlab.org/Publications/MouseKidenyOB/splicing/GE_Lean_6w_vs_GE_Obese_6w/RI/130_Tmem191c_chr16_17276634_17276887_+@chr16_17276634_17277039_+@chr16_17276962_17277039_+.pdf	Online figure
ENSMUSG00000055692.17	Tmem191c	2.13596e-05	0.000293149	0.479	0	0.479	chr16	+	RI	riExonStart_0base 17277341 riExonEnd 17277592 upstreamES 17277341 upstreamEE 17277401 downstreamES 17277527 downstreamEE 17277592	https://betsholtzlab.org/Publications/MouseKidenyOB/splicing/GE_Lean_6w_vs_GE_Obese_6w/RI/131_Tmem191c_chr16_17277342_17277401_+@chr16_17277342_17277592_+@chr16_17277528_17277592_+.pdf	Online figure
ENSMUSG00000055692.17	Tmem191c	0.00209322	0.00966354	0.495	0	0.495	chr16	+	RI	riExonStart_0base 17277668 riExonEnd 17277891 upstreamES 17277668 upstreamEE 17277741 downstreamES 17277850 downstreamEE 17277891	https://betsholtzlab.org/Publications/MouseKidenyOB/splicing/GE_Lean_6w_vs_GE_Obese_6w/RI/132_Tmem191c_chr16_17277669_17277741_+@chr16_17277669_17277891_+@chr16_17277851_17277891_+.pdf	Online figure
ENSMUSG00000025145.12	Lrrc45	0.00114302	0.00590731	0.349	1	-0.651	chr11	+	RI	riExonStart_0base 120718441 riExonEnd 120719132 upstreamES 120718441 upstreamEE 120718553 downstreamES 120719039 downstreamEE 120719132	https://betsholtzlab.org/Publications/MouseKidenyOB/splicing/GE_Lean_6w_vs_GE_Obese_6w/RI/133_Lrrc45_chr11_120718442_120718553_+@chr11_120718442_120719132_+@chr11_120719040_120719132_+.pdf	Online figure
ENSMUSG00000043065.11	Spice1	0.000794727	0.00433758	0.355	1	-0.645	chr16	+	RI	riExonStart_0base 44369879 riExonEnd 44370378 upstreamES 44369879 upstreamEE 44370019 downstreamES 44370237 downstreamEE 44370378	https://betsholtzlab.org/Publications/MouseKidenyOB/splicing/GE_Lean_6w_vs_GE_Obese_6w/RI/134_Spice1_chr16_44369880_44370019_+@chr16_44369880_44370378_+@chr16_44370238_44370378_+.pdf	Online figure
ENSMUSG00000024118.12	1600002H07Rik	0.000303422	0.00199384	0.164	1	-0.836	chr17	-	RI	riExonStart_0base 24219730 riExonEnd 24220310 upstreamES 24219730 upstreamEE 24220133 downstreamES 24220251 downstreamEE 24220310	https://betsholtzlab.org/Publications/MouseKidenyOB/splicing/GE_Lean_6w_vs_GE_Obese_6w/RI/135_1600002H07Rik_chr17_24220252_24220310_-@chr17_24219731_24220310_-@chr17_24219731_24220133_-.pdf	Online figure
ENSMUSG00000023960.12	Enpp5	0.000146537	0.00116534	0.059	1	-0.941	chr17	+	RI	riExonStart_0base 44082743 riExonEnd 44086567 upstreamES 44082743 upstreamEE 44082920 downstreamES 44085204 downstreamEE 44086567	https://betsholtzlab.org/Publications/MouseKidenyOB/splicing/GE_Lean_6w_vs_GE_Obese_6w/RI/136_Enpp5_chr17_44082744_44082920_+@chr17_44082744_44086567_+@chr17_44085205_44086567_+.pdf	Online figure
ENSMUSG00000001750.14	Tcirg1	1.63957e-05	0.000242408	0.209	0.702	-0.493	chr19	-	RI	riExonStart_0base 3901890 riExonEnd 3902556 upstreamES 3901890 upstreamEE 3902035 downstreamES 3902343 downstreamEE 3902556	https://betsholtzlab.org/Publications/MouseKidenyOB/splicing/GE_Lean_6w_vs_GE_Obese_6w/RI/137_Tcirg1_chr19_3902344_3902556_-@chr19_3901891_3902556_-@chr19_3901891_3902035_-.pdf	Online figure
ENSMUSG00000071653.8	1810009A15Rik	0.000576574	0.00333386	1	0.101	0.899	chr19	+	RI	riExonStart_0base 8889123 riExonEnd 8889727 upstreamES 8889123 upstreamEE 8889248 downstreamES 8889636 downstreamEE 8889727	https://betsholtzlab.org/Publications/MouseKidenyOB/splicing/GE_Lean_6w_vs_GE_Obese_6w/RI/138_1810009A15Rik_chr19_8889124_8889248_+@chr19_8889124_8889727_+@chr19_8889637_8889727_+.pdf	Online figure
ENSMUSG00000031278.11	Acsl4	0.000717856	0.00561548	0	0.591	-0.591	chrX	-	A3SS	longExonStart_0base 142351378 longExonEnd 142351908 shortES 142351378 shortEE 142351618 flankingES 142360386 flankingEE 142360436	https://betsholtzlab.org/Publications/MouseKidenyOB/splicing/GE_Lean_6w_vs_GE_Obese_6w/A3SS/1_Acsl4_chrX_142351379_142351618_-@chrX_142351379_142351908_-@chrX_142360387_142360436_-.pdf	Online figure
ENSMUSG00000031310.15	Zmym3	0.00298286	0.0171205	1	0.308	0.692	chrX	-	A3SS	longExonStart_0base 101416908 longExonEnd 101416981 shortES 101416908 shortEE 101416975 flankingES 101417286 flankingEE 101417330	https://betsholtzlab.org/Publications/MouseKidenyOB/splicing/GE_Lean_6w_vs_GE_Obese_6w/A3SS/2_Zmym3_chrX_101416909_101416975_-@chrX_101416909_101416981_-@chrX_101417287_101417330_-.pdf	Online figure
ENSMUSG00000057421.11	Las1l	0.000573737	0.00471631	1	0.253	0.747	chrX	-	A3SS	longExonStart_0base 95953221 longExonEnd 95955211 shortES 95953221 shortEE 95953303 flankingES 95955874 flankingEE 95956000	https://betsholtzlab.org/Publications/MouseKidenyOB/splicing/GE_Lean_6w_vs_GE_Obese_6w/A3SS/3_Las1l_chrX_95953222_95953303_-@chrX_95953222_95955211_-@chrX_95955875_95956000_-.pdf	Online figure
ENSMUSG00000031400.9	G6pdx	2.39973e-05	0.00058377	0	1	-1	chrX	-	A3SS	longExonStart_0base 74412318 longExonEnd 74412480 shortES 74412318 shortEE 74412477 flankingES 74413863 flankingEE 74414081	https://betsholtzlab.org/Publications/MouseKidenyOB/splicing/GE_Lean_6w_vs_GE_Obese_6w/A3SS/4_G6pdx_chrX_74412319_74412477_-@chrX_74412319_74412480_-@chrX_74413864_74414081_-.pdf	Online figure
ENSMUSG00000004221.15	Ikbkg	2.88667e-05	0.00058377	0	1	-1	chrX	+	A3SS	longExonStart_0base 74437163 longExonEnd 74437282 shortES 74437166 shortEE 74437282 flankingES 74433802 flankingEE 74434014	https://betsholtzlab.org/Publications/MouseKidenyOB/splicing/GE_Lean_6w_vs_GE_Obese_6w/A3SS/5_Ikbkg_chrX_74433803_74434014_+@chrX_74437164_74437282_+@chrX_74437167_74437282_+.pdf	Online figure
ENSMUSG00000009995.16	Taz	0.000693882	0.00547207	0	0.43	-0.43	chrX	+	A3SS	longExonStart_0base 74288447 longExonEnd 74288513 shortES 74288450 shortEE 74288513 flankingES 74288177 flankingEE 74288219	https://betsholtzlab.org/Publications/MouseKidenyOB/splicing/GE_Lean_6w_vs_GE_Obese_6w/A3SS/6_Taz_chrX_74288178_74288219_+@chrX_74288448_74288513_+@chrX_74288451_74288513_+.pdf	Online figure
ENSMUSG00000006676.15	Usp19	0.00125758	0.00807849	1	0.527	0.473	chr9	+	A3SS	longExonStart_0base 108495033 longExonEnd 108495254 shortES 108495039 shortEE 108495254 flankingES 108494811 flankingEE 108494927	https://betsholtzlab.org/Publications/MouseKidenyOB/splicing/GE_Lean_6w_vs_GE_Obese_6w/A3SS/7_Usp19_chr9_108494812_108494927_+@chr9_108495034_108495254_+@chr9_108495040_108495254_+.pdf	Online figure
ENSMUSG00000040370.12	Lyrm5	0.000103662	0.0013407	0.088	1	-0.912	chr6	+	A3SS	longExonStart_0base 145214521 longExonEnd 145215271 shortES 145215183 shortEE 145215271 flankingES 145211155 flankingEE 145211252	https://betsholtzlab.org/Publications/MouseKidenyOB/splicing/GE_Lean_6w_vs_GE_Obese_6w/A3SS/8_Lyrm5_chr6_145211156_145211252_+@chr6_145214522_145215271_+@chr6_145215184_145215271_+.pdf	Online figure
ENSMUSG00000031816.13	Mthfsd	2.97694e-05	0.00058377	1	0	1	chr8	-	A3SS	longExonStart_0base 121104391 longExonEnd 121104558 shortES 121104391 shortEE 121104505 flankingES 121105717 flankingEE 121105831	https://betsholtzlab.org/Publications/MouseKidenyOB/splicing/GE_Lean_6w_vs_GE_Obese_6w/A3SS/9_Mthfsd_chr8_121104392_121104505_-@chr8_121104392_121104558_-@chr8_121105718_121105831_-.pdf	Online figure
ENSMUSG00000030056.7	Isy1	0.00930525	0.039074	1	0.581	0.419	chr6	-	A3SS	longExonStart_0base 87825370 longExonEnd 87825488 shortES 87825370 shortEE 87825484 flankingES 87827583 flankingEE 87827696	https://betsholtzlab.org/Publications/MouseKidenyOB/splicing/GE_Lean_6w_vs_GE_Obese_6w/A3SS/10_Isy1_chr6_87825371_87825484_-@chr6_87825371_87825488_-@chr6_87827584_87827696_-.pdf	Online figure
ENSMUSG00000026197.11	Zfand2b	0.00125509	0.00807849	0.179	1	-0.821	chr1	+	A3SS	longExonStart_0base 75168830 longExonEnd 75168906 shortES 75168833 shortEE 75168906 flankingES 75168645 flankingEE 75168707	https://betsholtzlab.org/Publications/MouseKidenyOB/splicing/GE_Lean_6w_vs_GE_Obese_6w/A3SS/11_Zfand2b_chr1_75168646_75168707_+@chr1_75168831_75168906_+@chr1_75168834_75168906_+.pdf	Online figure
ENSMUSG00000056919.9	Cep162	0.00252668	0.0151289	0.197	1	-0.803	chr9	-	A3SS	longExonStart_0base 87238353 longExonEnd 87239933 shortES 87238353 shortEE 87238384 flankingES 87244277 flankingEE 87244345	https://betsholtzlab.org/Publications/MouseKidenyOB/splicing/GE_Lean_6w_vs_GE_Obese_6w/A3SS/12_Cep162_chr9_87238354_87238384_-@chr9_87238354_87239933_-@chr9_87244278_87244345_-.pdf	Online figure
ENSMUSG00000039623.12	Ap5z1	2.6164e-05	0.00058377	1	0	1	chr5	+	A3SS	longExonStart_0base 142466475 longExonEnd 142466676 shortES 142466489 shortEE 142466676 flankingES 142466257 flankingEE 142466392	https://betsholtzlab.org/Publications/MouseKidenyOB/splicing/GE_Lean_6w_vs_GE_Obese_6w/A3SS/13_Ap5z1_chr5_142466258_142466392_+@chr5_142466476_142466676_+@chr5_142466490_142466676_+.pdf	Online figure
ENSMUSG00000000916.14	Nsun5	1.76561e-07	1.80481e-05	1	0.087	0.913	chr5	+	A3SS	longExonStart_0base 135371497 longExonEnd 135371606 shortES 135371505 shortEE 135371606 flankingES 135371240 flankingEE 135371415	https://betsholtzlab.org/Publications/MouseKidenyOB/splicing/GE_Lean_6w_vs_GE_Obese_6w/A3SS/14_Nsun5_chr5_135371241_135371415_+@chr5_135371498_135371606_+@chr5_135371506_135371606_+.pdf	Online figure
ENSMUSG00000038095.14	Sbno1	4.01629e-07	3.11692e-05	0.303	1	-0.697	chr5	-	A3SS	longExonStart_0base 124410069 longExonEnd 124410382 shortES 124410069 shortEE 124410379 flankingES 124414398 flankingEE 124414527	https://betsholtzlab.org/Publications/MouseKidenyOB/splicing/GE_Lean_6w_vs_GE_Obese_6w/A3SS/15_Sbno1_chr5_124410070_124410379_-@chr5_124410070_124410382_-@chr5_124414399_124414527_-.pdf	Online figure
ENSMUSG00000042185.12	Nfrkb	3.02346e-05	0.00058377	0.621	0.116	0.505	chr9	+	A3SS	longExonStart_0base 31396793 longExonEnd 31397137 shortES 31397035 shortEE 31397137 flankingES 31396322 flankingEE 31396497	https://betsholtzlab.org/Publications/MouseKidenyOB/splicing/GE_Lean_6w_vs_GE_Obese_6w/A3SS/16_Nfrkb_chr9_31396323_31396497_+@chr9_31396794_31397137_+@chr9_31397036_31397137_+.pdf	Online figure
ENSMUSG00000018076.11	Med13l	2.80703e-05	0.00058377	0	1	-1	chr5	+	A3SS	longExonStart_0base 118751839 longExonEnd 118752009 shortES 118751866 shortEE 118752009 flankingES 118751530 flankingEE 118751754	https://betsholtzlab.org/Publications/MouseKidenyOB/splicing/GE_Lean_6w_vs_GE_Obese_6w/A3SS/17_Med13l_chr5_118751531_118751754_+@chr5_118751840_118752009_+@chr5_118751867_118752009_+.pdf	Online figure
ENSMUSG00000041870.15	Ankrd13a	2.62108e-05	0.00058377	0.036	1	-0.964	chr5	+	A3SS	longExonStart_0base 114798517 longExonEnd 114798651 shortES 114798520 shortEE 114798651 flankingES 114797852 flankingEE 114797914	https://betsholtzlab.org/Publications/MouseKidenyOB/splicing/GE_Lean_6w_vs_GE_Obese_6w/A3SS/18_Ankrd13a_chr5_114797853_114797914_+@chr5_114798518_114798651_+@chr5_114798521_114798651_+.pdf	Online figure
ENSMUSG00000037458.13	Azin1	4.13545e-09	1.76077e-06	0.58	0.041	0.539	chr15	-	A3SS	longExonStart_0base 38497263 longExonEnd 38497550 shortES 38497263 shortEE 38497398 flankingES 38498668 flankingEE 38498841	https://betsholtzlab.org/Publications/MouseKidenyOB/splicing/GE_Lean_6w_vs_GE_Obese_6w/A3SS/19_Azin1_chr15_38497264_38497398_-@chr15_38497264_38497550_-@chr15_38498669_38498841_-.pdf	Online figure
ENSMUSG00000057406.15	Whsc1	0.000740859	0.00568544	1	0.32	0.68	chr5	+	A3SS	longExonStart_0base 33867573 longExonEnd 33867658 shortES 33867576 shortEE 33867658 flankingES 33864659 flankingEE 33864778	https://betsholtzlab.org/Publications/MouseKidenyOB/splicing/GE_Lean_6w_vs_GE_Obese_6w/A3SS/20_Whsc1_chr5_33864660_33864778_+@chr5_33867574_33867658_+@chr5_33867577_33867658_+.pdf	Online figure
ENSMUSG00000030374.14	Strn4	5.36764e-05	0.000826447	1	0	1	chr7	+	A3SS	longExonStart_0base 16831345 longExonEnd 16831580 shortES 16831464 shortEE 16831580 flankingES 16831024 flankingEE 16831138	https://betsholtzlab.org/Publications/MouseKidenyOB/splicing/GE_Lean_6w_vs_GE_Obese_6w/A3SS/21_Strn4_chr7_16831025_16831138_+@chr7_16831346_16831580_+@chr7_16831465_16831580_+.pdf	Online figure
ENSMUSG00000029625.15	Cpsf4	0.0123486	0.0475325	0.653	0.191	0.462	chr5	+	A3SS	longExonStart_0base 145178832 longExonEnd 145178928 shortES 145178835 shortEE 145178928 flankingES 145177229 flankingEE 145177302	https://betsholtzlab.org/Publications/MouseKidenyOB/splicing/GE_Lean_6w_vs_GE_Obese_6w/A3SS/22_Cpsf4_chr5_145177230_145177302_+@chr5_145178833_145178928_+@chr5_145178836_145178928_+.pdf	Online figure
ENSMUSG00000024830.15	Rps6kb2	0.000100142	0.00131267	0.592	0.041	0.551	chr19	-	A3SS	longExonStart_0base 4158065 longExonEnd 4158363 shortES 4158065 shortEE 4158128 flankingES 4158609 flankingEE 4158919	https://betsholtzlab.org/Publications/MouseKidenyOB/splicing/GE_Lean_6w_vs_GE_Obese_6w/A3SS/23_Rps6kb2_chr19_4158066_4158128_-@chr19_4158066_4158363_-@chr19_4158610_4158919_-.pdf	Online figure
ENSMUSG00000022401.10	Xpnpep3	6.64406e-05	0.000991498	1	0	1	chr15	+	A3SS	longExonStart_0base 81415846 longExonEnd 81415994 shortES 81415902 shortEE 81415994 flankingES 81414431 flankingEE 81414548	https://betsholtzlab.org/Publications/MouseKidenyOB/splicing/GE_Lean_6w_vs_GE_Obese_6w/A3SS/24_Xpnpep3_chr15_81414432_81414548_+@chr15_81415847_81415994_+@chr15_81415903_81415994_+.pdf	Online figure
ENSMUSG00000028522.15	Mier1	3.6359e-05	0.000641241	1	0	1	chr4	+	A3SS	longExonStart_0base 103118238 longExonEnd 103118315 shortES 103118241 shortEE 103118315 flankingES 103115559 flankingEE 103115660	https://betsholtzlab.org/Publications/MouseKidenyOB/splicing/GE_Lean_6w_vs_GE_Obese_6w/A3SS/25_Mier1_chr4_103115560_103115660_+@chr4_103118239_103118315_+@chr4_103118242_103118315_+.pdf	Online figure
ENSMUSG00000062590.12	Armc9	4.04374e-06	0.000178292	1	0	1	chr1	+	A3SS	longExonStart_0base 86213049 longExonEnd 86213105 shortES 86213052 shortEE 86213105 flankingES 86207952 flankingEE 86208043	https://betsholtzlab.org/Publications/MouseKidenyOB/splicing/GE_Lean_6w_vs_GE_Obese_6w/A3SS/26_Armc9_chr1_86207953_86208043_+@chr1_86213050_86213105_+@chr1_86213053_86213105_+.pdf	Online figure
ENSMUSG00000038705.12	Gmeb2	0.0120506	0.0471245	1	0.576	0.424	chr2	-	A3SS	longExonStart_0base 181264969 longExonEnd 181265108 shortES 181264969 shortEE 181265103 flankingES 181265814 flankingEE 181265912	https://betsholtzlab.org/Publications/MouseKidenyOB/splicing/GE_Lean_6w_vs_GE_Obese_6w/A3SS/27_Gmeb2_chr2_181264970_181265103_-@chr2_181264970_181265108_-@chr2_181265815_181265912_-.pdf	Online figure
ENSMUSG00000038611.15	Phrf1	0.00134372	0.00851902	1	0.533	0.467	chr7	+	A3SS	longExonStart_0base 141261212 longExonEnd 141261542 shortES 141261287 shortEE 141261542 flankingES 141260959 flankingEE 141261114	https://betsholtzlab.org/Publications/MouseKidenyOB/splicing/GE_Lean_6w_vs_GE_Obese_6w/A3SS/28_Phrf1_chr7_141260960_141261114_+@chr7_141261213_141261542_+@chr7_141261288_141261542_+.pdf	Online figure
ENSMUSG00000032633.11	Flcn	0.00614639	0.0288019	1	0.29	0.71	chr11	-	A3SS	longExonStart_0base 59795140 longExonEnd 59795575 shortES 59795140 shortEE 59795264 flankingES 59795749 flankingEE 59795863	https://betsholtzlab.org/Publications/MouseKidenyOB/splicing/GE_Lean_6w_vs_GE_Obese_6w/A3SS/29_Flcn_chr11_59795141_59795264_-@chr11_59795141_59795575_-@chr11_59795750_59795863_-.pdf	Online figure
ENSMUSG00000036073.16	Galt	0.000349945	0.00349945	0.618	0.079	0.539	chr4	+	A3SS	longExonStart_0base 41756343 longExonEnd 41756422 shortES 41756346 shortEE 41756422 flankingES 41755960 flankingEE 41756130	https://betsholtzlab.org/Publications/MouseKidenyOB/splicing/GE_Lean_6w_vs_GE_Obese_6w/A3SS/30_Galt_chr4_41755961_41756130_+@chr4_41756344_41756422_+@chr4_41756347_41756422_+.pdf	Online figure
ENSMUSG00000064289.14	Tank	1.16788e-06	6.66377e-05	1	0	1	chr2	+	A3SS	longExonStart_0base 61626902 longExonEnd 61627014 shortES 61626905 shortEE 61627014 flankingES 61613650 flankingEE 61613715	https://betsholtzlab.org/Publications/MouseKidenyOB/splicing/GE_Lean_6w_vs_GE_Obese_6w/A3SS/31_Tank_chr2_61613651_61613715_+@chr2_61626903_61627014_+@chr2_61626906_61627014_+.pdf	Online figure
ENSMUSG00000054387.12	Mdm4	0.00534382	0.0265275	0	0.414	-0.414	chr1	-	A3SS	longExonStart_0base 133012636 longExonEnd 133012714 shortES 133012636 shortEE 133012711 flankingES 133018776 flankingEE 133018884	https://betsholtzlab.org/Publications/MouseKidenyOB/splicing/GE_Lean_6w_vs_GE_Obese_6w/A3SS/32_Mdm4_chr1_133012637_133012711_-@chr1_133012637_133012714_-@chr1_133018777_133018884_-.pdf	Online figure
ENSMUSG00000018189.11	Uchl5	0.000492232	0.00430149	0.485	1	-0.515	chr1	+	A3SS	longExonStart_0base 143799920 longExonEnd 143800034 shortES 143799923 shortEE 143800034 flankingES 143798390 flankingEE 143798493	https://betsholtzlab.org/Publications/MouseKidenyOB/splicing/GE_Lean_6w_vs_GE_Obese_6w/A3SS/33_Uchl5_chr1_143798391_143798493_+@chr1_143799921_143800034_+@chr1_143799924_143800034_+.pdf	Online figure
ENSMUSG00000032363.14	Adamts7	0.00179066	0.0111342	0.528	1	-0.472	chr9	+	A3SS	longExonStart_0base 90192898 longExonEnd 90194269 shortES 90193024 shortEE 90194269 flankingES 90192380 flankingEE 90192594	https://betsholtzlab.org/Publications/MouseKidenyOB/splicing/GE_Lean_6w_vs_GE_Obese_6w/A3SS/34_Adamts7_chr9_90192381_90192594_+@chr9_90192899_90194269_+@chr9_90193025_90194269_+.pdf	Online figure
ENSMUSG00000037262.7	Kin	0.00100744	0.00695917	1	0.293	0.707	chr2	+	A3SS	longExonStart_0base 10090112 longExonEnd 10090363 shortES 10090240 shortEE 10090363 flankingES 10085729 flankingEE 10085824	https://betsholtzlab.org/Publications/MouseKidenyOB/splicing/GE_Lean_6w_vs_GE_Obese_6w/A3SS/35_Kin_chr2_10085730_10085824_+@chr2_10090113_10090363_+@chr2_10090241_10090363_+.pdf	Online figure
ENSMUSG00000026648.17	Dclre1c	9.37837e-05	0.00126	1	0.12	0.88	chr2	+	A3SS	longExonStart_0base 3436988 longExonEnd 3437090 shortES 3437029 shortEE 3437090 flankingES 3436437 flankingEE 3436493	https://betsholtzlab.org/Publications/MouseKidenyOB/splicing/GE_Lean_6w_vs_GE_Obese_6w/A3SS/36_Dclre1c_chr2_3436438_3436493_+@chr2_3436989_3437090_+@chr2_3437030_3437090_+.pdf	Online figure
ENSMUSG00000026648.17	Dclre1c	2.70831e-05	0.00058377	1	0	1	chr2	+	A3SS	longExonStart_0base 3437001 longExonEnd 3437090 shortES 3437029 shortEE 3437090 flankingES 3436437 flankingEE 3436493	https://betsholtzlab.org/Publications/MouseKidenyOB/splicing/GE_Lean_6w_vs_GE_Obese_6w/A3SS/37_Dclre1c_chr2_3436438_3436493_+@chr2_3437002_3437090_+@chr2_3437030_3437090_+.pdf	Online figure
ENSMUSG00000032280.15	Tle3	0.00910545	0.038569	0.485	1	-0.515	chr9	+	A3SS	longExonStart_0base 61401852 longExonEnd 61402057 shortES 61401855 shortEE 61402057 flankingES 61394607 flankingEE 61394712	https://betsholtzlab.org/Publications/MouseKidenyOB/splicing/GE_Lean_6w_vs_GE_Obese_6w/A3SS/38_Tle3_chr9_61394608_61394712_+@chr9_61401853_61402057_+@chr9_61401856_61402057_+.pdf	Online figure
ENSMUSG00000038473.13	Nos1ap	0.00069233	0.00547207	1	0.338	0.662	chr1	-	A3SS	longExonStart_0base 170375247 longExonEnd 170375321 shortES 170375247 shortEE 170375306 flankingES 170390730 flankingEE 170390823	https://betsholtzlab.org/Publications/MouseKidenyOB/splicing/GE_Lean_6w_vs_GE_Obese_6w/A3SS/39_Nos1ap_chr1_170375248_170375306_-@chr1_170375248_170375321_-@chr1_170390731_170390823_-.pdf	Online figure
ENSMUSG00000030177.13	Ccdc77	7.87103e-05	0.00107534	0.704	0	0.704	chr6	-	A3SS	longExonStart_0base 120350206 longExonEnd 120350444 shortES 120350206 shortEE 120350390 flankingES 120354000 flankingEE 120354054	https://betsholtzlab.org/Publications/MouseKidenyOB/splicing/GE_Lean_6w_vs_GE_Obese_6w/A3SS/40_Ccdc77_chr6_120350207_120350390_-@chr6_120350207_120350444_-@chr6_120354001_120354054_-.pdf	Online figure
ENSMUSG00000041570.13	Camsap2	2.80703e-05	0.00058377	0	1	-1	chr1	-	A3SS	longExonStart_0base 136274800 longExonEnd 136274900 shortES 136274800 shortEE 136274873 flankingES 136276537 flankingEE 136276758	https://betsholtzlab.org/Publications/MouseKidenyOB/splicing/GE_Lean_6w_vs_GE_Obese_6w/A3SS/41_Camsap2_chr1_136274801_136274873_-@chr1_136274801_136274900_-@chr1_136276538_136276758_-.pdf	Online figure
ENSMUSG00000030556.11	Lrrc28	9.48247e-05	0.00126	1	0.338	0.662	chr7	-	A3SS	longExonStart_0base 67559857 longExonEnd 67560064 shortES 67559857 shortEE 67559969 flankingES 67617992 flankingEE 67618130	https://betsholtzlab.org/Publications/MouseKidenyOB/splicing/GE_Lean_6w_vs_GE_Obese_6w/A3SS/42_Lrrc28_chr7_67559858_67559969_-@chr7_67559858_67560064_-@chr7_67617993_67618130_-.pdf	Online figure
ENSMUSG00000041977.16	Arhgef11	0.00910545	0.038569	1	0.485	0.515	chr3	+	A3SS	longExonStart_0base 87717420 longExonEnd 87717520 shortES 87717423 shortEE 87717520 flankingES 87717029 flankingEE 87717174	https://betsholtzlab.org/Publications/MouseKidenyOB/splicing/GE_Lean_6w_vs_GE_Obese_6w/A3SS/43_Arhgef11_chr3_87717030_87717174_+@chr3_87717421_87717520_+@chr3_87717424_87717520_+.pdf	Online figure
ENSMUSG00000051169.13	Rpusd3	2.31901e-05	0.00058377	1	0.147	0.853	chr6	-	A3SS	longExonStart_0base 113416306 longExonEnd 113416446 shortES 113416306 shortEE 113416432 flankingES 113416788 flankingEE 113416912	https://betsholtzlab.org/Publications/MouseKidenyOB/splicing/GE_Lean_6w_vs_GE_Obese_6w/A3SS/44_Rpusd3_chr6_113416307_113416432_-@chr6_113416307_113416446_-@chr6_113416789_113416912_-.pdf	Online figure
ENSMUSG00000087231.6	E230016M11Rik	1.46069e-07	1.77108e-05	1	0.037	0.963	chr6	+	A3SS	longExonStart_0base 67063394 longExonEnd 67064718 shortES 67064612 shortEE 67064718 flankingES 67043758 flankingEE 67043918	https://betsholtzlab.org/Publications/MouseKidenyOB/splicing/GE_Lean_6w_vs_GE_Obese_6w/A3SS/45_E230016M11Rik_chr6_67043759_67043918_+@chr6_67063395_67064718_+@chr6_67064613_67064718_+.pdf	Online figure
ENSMUSG00000020817.15	Rabep1	1.65124e-05	0.000485363	1	0	1	chr11	+	A3SS	longExonStart_0base 70935120 longExonEnd 70935182 shortES 70935126 shortEE 70935182 flankingES 70934404 flankingEE 70934594	https://betsholtzlab.org/Publications/MouseKidenyOB/splicing/GE_Lean_6w_vs_GE_Obese_6w/A3SS/46_Rabep1_chr11_70934405_70934594_+@chr11_70935121_70935182_+@chr11_70935127_70935182_+.pdf	Online figure
ENSMUSG00000026975.9	Dph7	0.000499964	0.00433005	0.435	0	0.435	chr2	+	A3SS	longExonStart_0base 24965556 longExonEnd 24965654 shortES 24965559 shortEE 24965654 flankingES 24963455 flankingEE 24963543	https://betsholtzlab.org/Publications/MouseKidenyOB/splicing/GE_Lean_6w_vs_GE_Obese_6w/A3SS/47_Dph7_chr2_24963456_24963543_+@chr2_24965557_24965654_+@chr2_24965560_24965654_+.pdf	Online figure
ENSMUSG00000025340.13	Rabgef1	3.28851e-07	2.89987e-05	0.105	0.912	-0.807	chr5	+	A3SS	longExonStart_0base 130197946 longExonEnd 130198116 shortES 130197949 shortEE 130198116 flankingES 130190876 flankingEE 130191043	https://betsholtzlab.org/Publications/MouseKidenyOB/splicing/GE_Lean_6w_vs_GE_Obese_6w/A3SS/48_Rabgef1_chr5_130190877_130191043_+@chr5_130197947_130198116_+@chr5_130197950_130198116_+.pdf	Online figure
ENSMUSG00000036893.15	Ehmt1	0.000991696	0.00692047	1	0.485	0.515	chr2	-	A3SS	longExonStart_0base 24863771 longExonEnd 24863908 shortES 24863771 shortEE 24863905 flankingES 24877454 flankingEE 24877626	https://betsholtzlab.org/Publications/MouseKidenyOB/splicing/GE_Lean_6w_vs_GE_Obese_6w/A3SS/49_Ehmt1_chr2_24863772_24863905_-@chr2_24863772_24863908_-@chr2_24877455_24877626_-.pdf	Online figure
ENSMUSG00000036893.15	Ehmt1	0.000416514	0.0038478	1	0.309	0.691	chr2	-	A3SS	longExonStart_0base 24863771 longExonEnd 24863929 shortES 24863771 shortEE 24863905 flankingES 24877454 flankingEE 24877626	https://betsholtzlab.org/Publications/MouseKidenyOB/splicing/GE_Lean_6w_vs_GE_Obese_6w/A3SS/50_Ehmt1_chr2_24863772_24863905_-@chr2_24863772_24863929_-@chr2_24877455_24877626_-.pdf	Online figure
ENSMUSG00000057691.7	Zfp746	1.75348e-05	0.000496139	1	0	1	chr6	-	A3SS	longExonStart_0base 48062394 longExonEnd 48064952 shortES 48062394 shortEE 48064949 flankingES 48066428 flankingEE 48066554	https://betsholtzlab.org/Publications/MouseKidenyOB/splicing/GE_Lean_6w_vs_GE_Obese_6w/A3SS/51_Zfp746_chr6_48062395_48064949_-@chr6_48062395_48064952_-@chr6_48066429_48066554_-.pdf	Online figure
ENSMUSG00000028689.13	Ccdc163	4.40449e-05	0.000749536	0	1	-1	chr4	+	A3SS	longExonStart_0base 116714015 longExonEnd 116714149 shortES 116714087 shortEE 116714149 flankingES 116712722 flankingEE 116712826	https://betsholtzlab.org/Publications/MouseKidenyOB/splicing/GE_Lean_6w_vs_GE_Obese_6w/A3SS/52_Ccdc163_chr4_116712723_116712826_+@chr4_116714016_116714149_+@chr4_116714088_116714149_+.pdf	Online figure
ENSMUSG00000038271.16	Iffo1	0.000200126	0.00233883	0.331	1	-0.669	chr6	+	A3SS	longExonStart_0base 125151794 longExonEnd 125152771 shortES 125152613 shortEE 125152771 flankingES 125151384 flankingEE 125151525	https://betsholtzlab.org/Publications/MouseKidenyOB/splicing/GE_Lean_6w_vs_GE_Obese_6w/A3SS/53_Iffo1_chr6_125151385_125151525_+@chr6_125151795_125152771_+@chr6_125152614_125152771_+.pdf	Online figure
ENSMUSG00000038271.16	Iffo1	0.00042545	0.00389327	0.296	1	-0.704	chr6	+	A3SS	longExonStart_0base 125152443 longExonEnd 125152771 shortES 125152613 shortEE 125152771 flankingES 125151384 flankingEE 125151525	https://betsholtzlab.org/Publications/MouseKidenyOB/splicing/GE_Lean_6w_vs_GE_Obese_6w/A3SS/54_Iffo1_chr6_125151385_125151525_+@chr6_125152444_125152771_+@chr6_125152614_125152771_+.pdf	Online figure
ENSMUSG00000062729.10	Ppox	0.00560514	0.0268697	1	0.553	0.447	chr1	-	A3SS	longExonStart_0base 171279429 longExonEnd 171280001 shortES 171279429 shortEE 171279574 flankingES 171280139 flankingEE 171280255	https://betsholtzlab.org/Publications/MouseKidenyOB/splicing/GE_Lean_6w_vs_GE_Obese_6w/A3SS/55_Ppox_chr1_171279430_171279574_-@chr1_171279430_171280001_-@chr1_171280140_171280255_-.pdf	Online figure
ENSMUSG00000029106.13	Add1	0.000256194	0.00280394	1	0.239	0.761	chr5	+	A3SS	longExonStart_0base 34629135 longExonEnd 34629172 shortES 34629138 shortEE 34629172 flankingES 34628414 flankingEE 34628513	https://betsholtzlab.org/Publications/MouseKidenyOB/splicing/GE_Lean_6w_vs_GE_Obese_6w/A3SS/56_Add1_chr5_34628415_34628513_+@chr5_34629136_34629172_+@chr5_34629139_34629172_+.pdf	Online figure
ENSMUSG00000032966.13	Fkbp1a	0.000354278	0.00350663	0.907	0.431	0.476	chr2	+	A3SS	longExonStart_0base 151543905 longExonEnd 151544140 shortES 151544012 shortEE 151544140 flankingES 151542817 flankingEE 151542865	https://betsholtzlab.org/Publications/MouseKidenyOB/splicing/GE_Lean_6w_vs_GE_Obese_6w/A3SS/57_Fkbp1a_chr2_151542818_151542865_+@chr2_151543906_151544140_+@chr2_151544013_151544140_+.pdf	Online figure
ENSMUSG00000026153.14	Fam135a	7.26091e-09	1.76077e-06	0	1	-1	chr1	-	A3SS	longExonStart_0base 24028199 longExonEnd 24030528 shortES 24028199 shortEE 24029940 flankingES 24030741 flankingEE 24030896	https://betsholtzlab.org/Publications/MouseKidenyOB/splicing/GE_Lean_6w_vs_GE_Obese_6w/A3SS/58_Fam135a_chr1_24028200_24029940_-@chr1_24028200_24030528_-@chr1_24030742_24030896_-.pdf	Online figure
ENSMUSG00000036036.14	Zfp57	0.00010825	0.00136367	1	0.145	0.855	chr17	+	A3SS	longExonStart_0base 37006049 longExonEnd 37006194 shortES 37006058 shortEE 37006194 flankingES 37004796 flankingEE 37004903	https://betsholtzlab.org/Publications/MouseKidenyOB/splicing/GE_Lean_6w_vs_GE_Obese_6w/A3SS/59_Zfp57_chr17_37004797_37004903_+@chr17_37006050_37006194_+@chr17_37006059_37006194_+.pdf	Online figure
ENSMUSG00000040785.16	Ttc3	0.000244706	0.00272833	1	0.557	0.443	chr16	+	A3SS	longExonStart_0base 94439184 longExonEnd 94439349 shortES 94439187 shortEE 94439349 flankingES 94435475 flankingEE 94435546	https://betsholtzlab.org/Publications/MouseKidenyOB/splicing/GE_Lean_6w_vs_GE_Obese_6w/A3SS/60_Ttc3_chr16_94435476_94435546_+@chr16_94439185_94439349_+@chr16_94439188_94439349_+.pdf	Online figure
ENSMUSG00000031090.13	Nadsyn1	0.000348712	0.00349945	0	0.671	-0.671	chr7	-	A3SS	longExonStart_0base 143815585 longExonEnd 143815722 shortES 143815585 shortEE 143815675 flankingES 143816173 flankingEE 143816227	https://betsholtzlab.org/Publications/MouseKidenyOB/splicing/GE_Lean_6w_vs_GE_Obese_6w/A3SS/61_Nadsyn1_chr7_143815586_143815675_-@chr7_143815586_143815722_-@chr7_143816174_143816227_-.pdf	Online figure
ENSMUSG00000042520.15	Ubap2l	0.000742067	0.00568544	0.952	0.485	0.467	chr3	-	A3SS	longExonStart_0base 90002278 longExonEnd 90002476 shortES 90002278 shortEE 90002473 flankingES 90003244 flankingEE 90003312	https://betsholtzlab.org/Publications/MouseKidenyOB/splicing/GE_Lean_6w_vs_GE_Obese_6w/A3SS/62_Ubap2l_chr3_90002279_90002473_-@chr3_90002279_90002476_-@chr3_90003245_90003312_-.pdf	Online figure
ENSMUSG00000028760.15	Eif4g3	0.00947315	0.0393194	0.316	1	-0.684	chr4	+	A3SS	longExonStart_0base 138180489 longExonEnd 138180607 shortES 138180546 shortEE 138180607 flankingES 138177916 flankingEE 138178010	https://betsholtzlab.org/Publications/MouseKidenyOB/splicing/GE_Lean_6w_vs_GE_Obese_6w/A3SS/63_Eif4g3_chr4_138177917_138178010_+@chr4_138180490_138180607_+@chr4_138180547_138180607_+.pdf	Online figure
ENSMUSG00000026288.13	Inpp5d	0.00306115	0.0172635	0	0.531	-0.531	chr1	+	A3SS	longExonStart_0base 87715260 longExonEnd 87715313 shortES 87715276 shortEE 87715313 flankingES 87715037 flankingEE 87715093	https://betsholtzlab.org/Publications/MouseKidenyOB/splicing/GE_Lean_6w_vs_GE_Obese_6w/A3SS/64_Inpp5d_chr1_87715038_87715093_+@chr1_87715261_87715313_+@chr1_87715277_87715313_+.pdf	Online figure
ENSMUSG00000039068.15	Zzz3	0.00305592	0.0172635	0.557	1	-0.443	chr3	+	A3SS	longExonStart_0base 152449012 longExonEnd 152449128 shortES 152449015 shortEE 152449128 flankingES 152448778 flankingEE 152448926	https://betsholtzlab.org/Publications/MouseKidenyOB/splicing/GE_Lean_6w_vs_GE_Obese_6w/A3SS/65_Zzz3_chr3_152448779_152448926_+@chr3_152449013_152449128_+@chr3_152449016_152449128_+.pdf	Online figure
ENSMUSG00000026826.12	Nr4a2	4.83953e-08	7.82391e-06	0.028	0.636	-0.608	chr2	-	A3SS	longExonStart_0base 57112950 longExonEnd 57113289 shortES 57112950 shortEE 57113072 flankingES 57114717 flankingEE 57115038	https://betsholtzlab.org/Publications/MouseKidenyOB/splicing/GE_Lean_6w_vs_GE_Obese_6w/A3SS/66_Nr4a2_chr2_57112951_57113072_-@chr2_57112951_57113289_-@chr2_57114718_57115038_-.pdf	Online figure
ENSMUSG00000047459.13	Dynlrb1	8.66198e-06	0.000300076	0	1	-1	chr2	+	A3SS	longExonStart_0base 155242730 longExonEnd 155242806 shortES 155242734 shortEE 155242806 flankingES 155236607 flankingEE 155236936	https://betsholtzlab.org/Publications/MouseKidenyOB/splicing/GE_Lean_6w_vs_GE_Obese_6w/A3SS/67_Dynlrb1_chr2_155236608_155236936_+@chr2_155242731_155242806_+@chr2_155242735_155242806_+.pdf	Online figure
ENSMUSG00000032913.12	Lrig2	0.000199692	0.00233883	1	0.296	0.704	chr3	-	A3SS	longExonStart_0base 104462658 longExonEnd 104462808 shortES 104462658 shortEE 104462787 flankingES 104463858 flankingEE 104464308	https://betsholtzlab.org/Publications/MouseKidenyOB/splicing/GE_Lean_6w_vs_GE_Obese_6w/A3SS/68_Lrig2_chr3_104462659_104462787_-@chr3_104462659_104462808_-@chr3_104463859_104464308_-.pdf	Online figure
ENSMUSG00000032913.12	Lrig2	3.53204e-05	0.000634458	1	0.155	0.845	chr3	-	A3SS	longExonStart_0base 104462658 longExonEnd 104462845 shortES 104462658 shortEE 104462787 flankingES 104463858 flankingEE 104464308	https://betsholtzlab.org/Publications/MouseKidenyOB/splicing/GE_Lean_6w_vs_GE_Obese_6w/A3SS/69_Lrig2_chr3_104462659_104462787_-@chr3_104462659_104462845_-@chr3_104463859_104464308_-.pdf	Online figure
ENSMUSG00000032913.12	Lrig2	7.07844e-05	0.00102479	1	0	1	chr3	-	A3SS	longExonStart_0base 104462658 longExonEnd 104462845 shortES 104462658 shortEE 104462808 flankingES 104463858 flankingEE 104464308	https://betsholtzlab.org/Publications/MouseKidenyOB/splicing/GE_Lean_6w_vs_GE_Obese_6w/A3SS/70_Lrig2_chr3_104462659_104462808_-@chr3_104462659_104462845_-@chr3_104463859_104464308_-.pdf	Online figure
ENSMUSG00000023707.12	Ogfod2	0.00148764	0.00937021	0.542	0.116	0.426	chr5	+	A3SS	longExonStart_0base 124114064 longExonEnd 124114645 shortES 124114387 shortEE 124114645 flankingES 124113428 flankingEE 124113528	https://betsholtzlab.org/Publications/MouseKidenyOB/splicing/GE_Lean_6w_vs_GE_Obese_6w/A3SS/71_Ogfod2_chr5_124113429_124113528_+@chr5_124114065_124114645_+@chr5_124114388_124114645_+.pdf	Online figure
ENSMUSG00000034343.13	Ube2f	8.91225e-07	5.76326e-05	1	0.115	0.885	chr1	+	A3SS	longExonStart_0base 91254214 longExonEnd 91254393 shortES 91254259 shortEE 91254393 flankingES 91253759 flankingEE 91253827	https://betsholtzlab.org/Publications/MouseKidenyOB/splicing/GE_Lean_6w_vs_GE_Obese_6w/A3SS/72_Ube2f_chr1_91253760_91253827_+@chr1_91254215_91254393_+@chr1_91254260_91254393_+.pdf	Online figure
ENSMUSG00000028793.14	Rnf19b	0.000793967	0.00592422	0	0.611	-0.611	chr4	+	A3SS	longExonStart_0base 129073498 longExonEnd 129073643 shortES 129073501 shortEE 129073643 flankingES 129071736 flankingEE 129071942	https://betsholtzlab.org/Publications/MouseKidenyOB/splicing/GE_Lean_6w_vs_GE_Obese_6w/A3SS/73_Rnf19b_chr4_129071737_129071942_+@chr4_129073499_129073643_+@chr4_129073502_129073643_+.pdf	Online figure
ENSMUSG00000068735.13	Trp53i11	0.00311109	0.0174437	1	0.27	0.73	chr2	+	A3SS	longExonStart_0base 93197461 longExonEnd 93197748 shortES 93197611 shortEE 93197748 flankingES 93196896 flankingEE 93196978	https://betsholtzlab.org/Publications/MouseKidenyOB/splicing/GE_Lean_6w_vs_GE_Obese_6w/A3SS/74_Trp53i11_chr2_93196897_93196978_+@chr2_93197462_93197748_+@chr2_93197612_93197748_+.pdf	Online figure
ENSMUSG00000000600.14	Krit1	3.47508e-05	0.000634458	1	0.508	0.492	chr5	+	A3SS	longExonStart_0base 3806418 longExonEnd 3806568 shortES 3806464 shortEE 3806568 flankingES 3803183 flankingEE 3803483	https://betsholtzlab.org/Publications/MouseKidenyOB/splicing/GE_Lean_6w_vs_GE_Obese_6w/A3SS/75_Krit1_chr5_3803184_3803483_+@chr5_3806419_3806568_+@chr5_3806465_3806568_+.pdf	Online figure
ENSMUSG00000048000.14	Gigyf2	0.000411365	0.00383677	0.594	0	0.594	chr1	+	A3SS	longExonStart_0base 87406983 longExonEnd 87407201 shortES 87407001 shortEE 87407201 flankingES 87403666 flankingEE 87403846	https://betsholtzlab.org/Publications/MouseKidenyOB/splicing/GE_Lean_6w_vs_GE_Obese_6w/A3SS/76_Gigyf2_chr1_87403667_87403846_+@chr1_87406984_87407201_+@chr1_87407002_87407201_+.pdf	Online figure
ENSMUSG00000028545.12	Bend5	0.00357679	0.0192749	1	0.428	0.572	chr4	+	A3SS	longExonStart_0base 111433086 longExonEnd 111433553 shortES 111433168 shortEE 111433553 flankingES 111431016 flankingEE 111431150	https://betsholtzlab.org/Publications/MouseKidenyOB/splicing/GE_Lean_6w_vs_GE_Obese_6w/A3SS/77_Bend5_chr4_111431017_111431150_+@chr4_111433087_111433553_+@chr4_111433169_111433553_+.pdf	Online figure
ENSMUSG00000034771.14	Tle2	0.00103194	0.00704918	0.586	0	0.586	chr10	+	A3SS	longExonStart_0base 81586854 longExonEnd 81586928 shortES 81586857 shortEE 81586928 flankingES 81586212 flankingEE 81586373	https://betsholtzlab.org/Publications/MouseKidenyOB/splicing/GE_Lean_6w_vs_GE_Obese_6w/A3SS/78_Tle2_chr10_81586213_81586373_+@chr10_81586855_81586928_+@chr10_81586858_81586928_+.pdf	Online figure
ENSMUSG00000004561.13	Mettl17	1.52902e-05	0.000463484	1	0.274	0.726	chr14	+	A3SS	longExonStart_0base 51885387 longExonEnd 51885522 shortES 51885403 shortEE 51885522 flankingES 51885150 flankingEE 51885304	https://betsholtzlab.org/Publications/MouseKidenyOB/splicing/GE_Lean_6w_vs_GE_Obese_6w/A3SS/79_Mettl17_chr14_51885151_51885304_+@chr14_51885388_51885522_+@chr14_51885404_51885522_+.pdf	Online figure
ENSMUSG00000061689.14	Dlgap4	0.000915215	0.00656193	0.477	0.052	0.425	chr2	+	A3SS	longExonStart_0base 156748022 longExonEnd 156748420 shortES 156748331 shortEE 156748420 flankingES 156745834 flankingEE 156746196	https://betsholtzlab.org/Publications/MouseKidenyOB/splicing/GE_Lean_6w_vs_GE_Obese_6w/A3SS/80_Dlgap4_chr2_156745835_156746196_+@chr2_156748023_156748420_+@chr2_156748332_156748420_+.pdf	Online figure
ENSMUSG00000055897.12	Ppp4r1l-ps	9.77818e-07	5.92802e-05	0	1	-1	chr2	-	A3SS	longExonStart_0base 173592116 longExonEnd 173592333 shortES 173592116 shortEE 173592221 flankingES 173592801 flankingEE 173593014	https://betsholtzlab.org/Publications/MouseKidenyOB/splicing/GE_Lean_6w_vs_GE_Obese_6w/A3SS/81_Ppp4r1l-ps_chr2_173592117_173592221_-@chr2_173592117_173592333_-@chr2_173592802_173593014_-.pdf	Online figure
ENSMUSG00000055897.12	Ppp4r1l-ps	7.17392e-09	1.76077e-06	0.621	0	0.621	chr2	-	A3SS	longExonStart_0base 173615482 longExonEnd 173616423 shortES 173615482 shortEE 173615576 flankingES 173659322 flankingEE 173659367	https://betsholtzlab.org/Publications/MouseKidenyOB/splicing/GE_Lean_6w_vs_GE_Obese_6w/A3SS/82_Ppp4r1l-ps_chr2_173615483_173615576_-@chr2_173615483_173616423_-@chr2_173659323_173659367_-.pdf	Online figure
ENSMUSG00000004040.15	Stat3	0.000394359	0.00382528	0.405	0.845	-0.44	chr11	-	A3SS	longExonStart_0base 100889477 longExonEnd 100889590 shortES 100889477 shortEE 100889540 flankingES 100889885 flankingEE 100889928	https://betsholtzlab.org/Publications/MouseKidenyOB/splicing/GE_Lean_6w_vs_GE_Obese_6w/A3SS/83_Stat3_chr11_100889478_100889540_-@chr11_100889478_100889590_-@chr11_100889886_100889928_-.pdf	Online figure
ENSMUSG00000032580.11	Rbm5	4.42439e-06	0.000186594	1	0	1	chr9	-	A3SS	longExonStart_0base 107749707 longExonEnd 107749799 shortES 107749707 shortEE 107749796 flankingES 107750462 flankingEE 107750548	https://betsholtzlab.org/Publications/MouseKidenyOB/splicing/GE_Lean_6w_vs_GE_Obese_6w/A3SS/84_Rbm5_chr9_107749708_107749796_-@chr9_107749708_107749799_-@chr9_107750463_107750548_-.pdf	Online figure
ENSMUSG00000027569.14	Mrgbp	0.0039331	0.0206222	0.446	1	-0.554	chr2	+	A3SS	longExonStart_0base 180584693 longExonEnd 180584871 shortES 180584796 shortEE 180584871 flankingES 180584405 flankingEE 180584487	https://betsholtzlab.org/Publications/MouseKidenyOB/splicing/GE_Lean_6w_vs_GE_Obese_6w/A3SS/85_Mrgbp_chr2_180584406_180584487_+@chr2_180584694_180584871_+@chr2_180584797_180584871_+.pdf	Online figure
ENSMUSG00000040557.13	Wbscr27	3.17645e-06	0.000153136	1	0	1	chr5	+	A3SS	longExonStart_0base 134932621 longExonEnd 134932847 shortES 134932720 shortEE 134932847 flankingES 134932372 flankingEE 134932410	https://betsholtzlab.org/Publications/MouseKidenyOB/splicing/GE_Lean_6w_vs_GE_Obese_6w/A3SS/86_Wbscr27_chr5_134932373_134932410_+@chr5_134932622_134932847_+@chr5_134932721_134932847_+.pdf	Online figure
ENSMUSG00000027667.12	Zfp639	0.000408144	0.00383677	0.223	1	-0.777	chr3	+	A3SS	longExonStart_0base 32515283 longExonEnd 32517139 shortES 32517028 shortEE 32517139 flankingES 32514383 flankingEE 32514454	https://betsholtzlab.org/Publications/MouseKidenyOB/splicing/GE_Lean_6w_vs_GE_Obese_6w/A3SS/87_Zfp639_chr3_32514384_32514454_+@chr3_32515284_32517139_+@chr3_32517029_32517139_+.pdf	Online figure
ENSMUSG00000030166.13	Rad52	0.000803161	0.00594707	1	0.541	0.459	chr6	+	A3SS	longExonStart_0base 119922471 longExonEnd 119922823 shortES 119922474 shortEE 119922823 flankingES 119920806 flankingEE 119921028	https://betsholtzlab.org/Publications/MouseKidenyOB/splicing/GE_Lean_6w_vs_GE_Obese_6w/A3SS/88_Rad52_chr6_119920807_119921028_+@chr6_119922472_119922823_+@chr6_119922475_119922823_+.pdf	Online figure
ENSMUSG00000027751.12	Supt20	3.91427e-08	7.59369e-06	1	0.496	0.504	chr3	+	A3SS	longExonStart_0base 54722520 longExonEnd 54722640 shortES 54722556 shortEE 54722640 flankingES 54720405 flankingEE 54720461	https://betsholtzlab.org/Publications/MouseKidenyOB/splicing/GE_Lean_6w_vs_GE_Obese_6w/A3SS/89_Supt20_chr3_54720406_54720461_+@chr3_54722521_54722640_+@chr3_54722557_54722640_+.pdf	Online figure
ENSMUSG00000028134.10	Ptbp2	0.00430465	0.022449	0.434	0	0.434	chr3	-	A3SS	longExonStart_0base 119726065 longExonEnd 119726220 shortES 119726065 shortEE 119726205 flankingES 119740314 flankingEE 119740510	https://betsholtzlab.org/Publications/MouseKidenyOB/splicing/GE_Lean_6w_vs_GE_Obese_6w/A3SS/90_Ptbp2_chr3_119726066_119726205_-@chr3_119726066_119726220_-@chr3_119740315_119740510_-.pdf	Online figure
ENSMUSG00000032187.15	Smarca4	0.00893424	0.0382019	0.32	0.883	-0.563	chr9	+	A3SS	longExonStart_0base 21699799 longExonEnd 21699908 shortES 21699802 shortEE 21699908 flankingES 21686021 flankingEE 21686275	https://betsholtzlab.org/Publications/MouseKidenyOB/splicing/GE_Lean_6w_vs_GE_Obese_6w/A3SS/91_Smarca4_chr9_21686022_21686275_+@chr9_21699800_21699908_+@chr9_21699803_21699908_+.pdf	Online figure
ENSMUSG00000032898.8	Fbxo21	0.00653121	0.030025	0.583	0	0.583	chr5	+	A3SS	longExonStart_0base 118000316 longExonEnd 118000528 shortES 118000337 shortEE 118000528 flankingES 117995369 flankingEE 117995502	https://betsholtzlab.org/Publications/MouseKidenyOB/splicing/GE_Lean_6w_vs_GE_Obese_6w/A3SS/92_Fbxo21_chr5_117995370_117995502_+@chr5_118000317_118000528_+@chr5_118000338_118000528_+.pdf	Online figure
ENSMUSG00000042747.11	Krtcap2	1.31512e-07	1.77108e-05	1	0	1	chr3	+	A3SS	longExonStart_0base 89246777 longExonEnd 89246932 shortES 89246780 shortEE 89246932 flankingES 89246433 flankingEE 89246593	https://betsholtzlab.org/Publications/MouseKidenyOB/splicing/GE_Lean_6w_vs_GE_Obese_6w/A3SS/93_Krtcap2_chr3_89246434_89246593_+@chr3_89246778_89246932_+@chr3_89246781_89246932_+.pdf	Online figure
ENSMUSG00000021708.15	Rasgrf2	7.64409e-05	0.00105925	0	1	-1	chr13	-	A3SS	longExonStart_0base 91972180 longExonEnd 91972288 shortES 91972180 shortEE 91972285 flankingES 91982593 flankingEE 91982856	https://betsholtzlab.org/Publications/MouseKidenyOB/splicing/GE_Lean_6w_vs_GE_Obese_6w/A3SS/94_Rasgrf2_chr13_91972181_91972285_-@chr13_91972181_91972288_-@chr13_91982594_91982856_-.pdf	Online figure
ENSMUSG00000028256.15	Odf2l	1.60415e-06	8.64459e-05	1	0.009	0.991	chr3	+	A3SS	longExonStart_0base 145145875 longExonEnd 145148616 shortES 145148530 shortEE 145148616 flankingES 145144311 flankingEE 145144416	https://betsholtzlab.org/Publications/MouseKidenyOB/splicing/GE_Lean_6w_vs_GE_Obese_6w/A3SS/95_Odf2l_chr3_145144312_145144416_+@chr3_145145876_145148616_+@chr3_145148531_145148616_+.pdf	Online figure
ENSMUSG00000025437.14	Usp33	0.000958744	0.00676902	0.402	1	-0.598	chr3	+	A3SS	longExonStart_0base 152374890 longExonEnd 152374985 shortES 152374914 shortEE 152374985 flankingES 152374619 flankingEE 152374789	https://betsholtzlab.org/Publications/MouseKidenyOB/splicing/GE_Lean_6w_vs_GE_Obese_6w/A3SS/96_Usp33_chr3_152374620_152374789_+@chr3_152374891_152374985_+@chr3_152374915_152374985_+.pdf	Online figure
ENSMUSG00000055963.11	Triqk	0.00242014	0.0145809	1	0.485	0.515	chr4	+	A3SS	longExonStart_0base 12962941 longExonEnd 12963023 shortES 12962944 shortEE 12963023 flankingES 12917915 flankingEE 12918065	https://betsholtzlab.org/Publications/MouseKidenyOB/splicing/GE_Lean_6w_vs_GE_Obese_6w/A3SS/97_Triqk_chr4_12917916_12918065_+@chr4_12962942_12963023_+@chr4_12962945_12963023_+.pdf	Online figure
ENSMUSG00000097749.1	Gm16938	9.68754e-06	0.000324031	0	1	-1	chr7	+	A3SS	longExonStart_0base 98179297 longExonEnd 98179410 shortES 98179324 shortEE 98179410 flankingES 98178421 flankingEE 98178533	https://betsholtzlab.org/Publications/MouseKidenyOB/splicing/GE_Lean_6w_vs_GE_Obese_6w/A3SS/98_Gm16938_chr7_98178422_98178533_+@chr7_98179298_98179410_+@chr7_98179325_98179410_+.pdf	Online figure
ENSMUSG00000047417.16	Rexo1	4.32979e-05	0.000749536	0	1	-1	chr10	-	A3SS	longExonStart_0base 80543300 longExonEnd 80543497 shortES 80543300 shortEE 80543411 flankingES 80543646 flankingEE 80543720	https://betsholtzlab.org/Publications/MouseKidenyOB/splicing/GE_Lean_6w_vs_GE_Obese_6w/A3SS/99_Rexo1_chr10_80543301_80543411_-@chr10_80543301_80543497_-@chr10_80543647_80543720_-.pdf	Online figure
ENSMUSG00000030727.11	Rabep2	2.20646e-05	0.000578449	0.159	1	-0.841	chr7	+	A3SS	longExonStart_0base 126444522 longExonEnd 126444936 shortES 126444819 shortEE 126444936 flankingES 126444417 flankingEE 126444429	https://betsholtzlab.org/Publications/MouseKidenyOB/splicing/GE_Lean_6w_vs_GE_Obese_6w/A3SS/100_Rabep2_chr7_126444418_126444429_+@chr7_126444523_126444936_+@chr7_126444820_126444936_+.pdf	Online figure
ENSMUSG00000031516.10	Dctn6	0.000278944	0.00290941	0	0.405	-0.405	chr8	-	A3SS	longExonStart_0base 34104985 longExonEnd 34105098 shortES 34104985 shortEE 34105039 flankingES 34106341 flankingEE 34106406	https://betsholtzlab.org/Publications/MouseKidenyOB/splicing/GE_Lean_6w_vs_GE_Obese_6w/A3SS/101_Dctn6_chr8_34104986_34105039_-@chr8_34104986_34105098_-@chr8_34106342_34106406_-.pdf	Online figure
ENSMUSG00000026584.13	Scyl3	4.49864e-07	3.11692e-05	0	0.571	-0.571	chr1	+	A3SS	longExonStart_0base 163941020 longExonEnd 163941218 shortES 163941106 shortEE 163941218 flankingES 163939880 flankingEE 163939983	https://betsholtzlab.org/Publications/MouseKidenyOB/splicing/GE_Lean_6w_vs_GE_Obese_6w/A3SS/102_Scyl3_chr1_163939881_163939983_+@chr1_163941021_163941218_+@chr1_163941107_163941218_+.pdf	Online figure
ENSMUSG00000001909.14	Trmt1	2.74744e-05	0.00058377	0	1	-1	chr8	+	A3SS	longExonStart_0base 84690772 longExonEnd 84690947 shortES 84690801 shortEE 84690947 flankingES 84690516 flankingEE 84690572	https://betsholtzlab.org/Publications/MouseKidenyOB/splicing/GE_Lean_6w_vs_GE_Obese_6w/A3SS/103_Trmt1_chr8_84690517_84690572_+@chr8_84690773_84690947_+@chr8_84690802_84690947_+.pdf	Online figure
ENSMUSG00000036270.15	Edc4	0.000199518	0.00233883	0.485	0	0.485	chr8	+	A3SS	longExonStart_0base 105888595 longExonEnd 105888755 shortES 105888598 shortEE 105888755 flankingES 105888387 flankingEE 105888518	https://betsholtzlab.org/Publications/MouseKidenyOB/splicing/GE_Lean_6w_vs_GE_Obese_6w/A3SS/104_Edc4_chr8_105888388_105888518_+@chr8_105888596_105888755_+@chr8_105888599_105888755_+.pdf	Online figure
ENSMUSG00000036270.15	Edc4	0.00552065	0.0268697	1	0.447	0.553	chr8	+	A3SS	longExonStart_0base 105889630 longExonEnd 105889729 shortES 105889672 shortEE 105889729 flankingES 105889103 flankingEE 105889540	https://betsholtzlab.org/Publications/MouseKidenyOB/splicing/GE_Lean_6w_vs_GE_Obese_6w/A3SS/105_Edc4_chr8_105889104_105889540_+@chr8_105889631_105889729_+@chr8_105889673_105889729_+.pdf	Online figure
ENSMUSG00000001062.16	Vps9d1	4.73403e-06	0.000191334	0	1	-1	chr8	-	A3SS	longExonStart_0base 123247966 longExonEnd 123248071 shortES 123247966 shortEE 123248054 flankingES 123248153 flankingEE 123248206	https://betsholtzlab.org/Publications/MouseKidenyOB/splicing/GE_Lean_6w_vs_GE_Obese_6w/A3SS/106_Vps9d1_chr8_123247967_123248054_-@chr8_123247967_123248071_-@chr8_123248154_123248206_-.pdf	Online figure
ENSMUSG00000028085.11	Gatb	0.0110328	0.0444057	1	0.584	0.416	chr3	+	A3SS	longExonStart_0base 85604380 longExonEnd 85604579 shortES 85604453 shortEE 85604579 flankingES 85601859 flankingEE 85601973	https://betsholtzlab.org/Publications/MouseKidenyOB/splicing/GE_Lean_6w_vs_GE_Obese_6w/A3SS/107_Gatb_chr3_85601860_85601973_+@chr3_85604381_85604579_+@chr3_85604454_85604579_+.pdf	Online figure
ENSMUSG00000036138.15	Acaa1a	1.19465e-09	1.15881e-06	0.009	1	-0.991	chr9	+	A3SS	longExonStart_0base 119344465 longExonEnd 119346568 shortES 119346469 shortEE 119346568 flankingES 119344172 flankingEE 119344252	https://betsholtzlab.org/Publications/MouseKidenyOB/splicing/GE_Lean_6w_vs_GE_Obese_6w/A3SS/108_Acaa1a_chr9_119344173_119344252_+@chr9_119344466_119346568_+@chr9_119346470_119346568_+.pdf	Online figure
ENSMUSG00000004099.14	Dnmt1	0.00122766	0.00799214	0	0.611	-0.611	chr9	-	A3SS	longExonStart_0base 20940475 longExonEnd 20940554 shortES 20940475 shortEE 20940551 flankingES 20941372 flankingEE 20941583	https://betsholtzlab.org/Publications/MouseKidenyOB/splicing/GE_Lean_6w_vs_GE_Obese_6w/A3SS/109_Dnmt1_chr9_20940476_20940551_-@chr9_20940476_20940554_-@chr9_20941373_20941583_-.pdf	Online figure
ENSMUSG00000062906.11	Hdac10	0.00324595	0.0179919	0.86	0.277	0.583	chr15	-	A3SS	longExonStart_0base 89124174 longExonEnd 89124428 shortES 89124174 shortEE 89124253 flankingES 89124531 flankingEE 89124588	https://betsholtzlab.org/Publications/MouseKidenyOB/splicing/GE_Lean_6w_vs_GE_Obese_6w/A3SS/110_Hdac10_chr15_89124175_89124253_-@chr15_89124175_89124428_-@chr15_89124532_89124588_-.pdf	Online figure
ENSMUSG00000015937.13	H2afy	0.0112694	0.0448004	0	0.485	-0.485	chr13	-	A3SS	longExonStart_0base 56096123 longExonEnd 56096234 shortES 56096123 shortEE 56096231 flankingES 56104301 flankingEE 56104499	https://betsholtzlab.org/Publications/MouseKidenyOB/splicing/GE_Lean_6w_vs_GE_Obese_6w/A3SS/111_H2afy_chr13_56096124_56096231_-@chr13_56096124_56096234_-@chr13_56104302_56104499_-.pdf	Online figure
ENSMUSG00000054792.14	Klhl18	0.00478092	0.0241995	0.605	0	0.605	chr9	-	A3SS	longExonStart_0base 110436010 longExonEnd 110436248 shortES 110436010 shortEE 110436233 flankingES 110437346 flankingEE 110437483	https://betsholtzlab.org/Publications/MouseKidenyOB/splicing/GE_Lean_6w_vs_GE_Obese_6w/A3SS/112_Klhl18_chr9_110436011_110436233_-@chr9_110436011_110436248_-@chr9_110437347_110437483_-.pdf	Online figure
ENSMUSG00000032507.14	Fbxl2	2.9516e-05	0.00058377	0	1	-1	chr9	-	A3SS	longExonStart_0base 113983984 longExonEnd 113984116 shortES 113983984 shortEE 113984041 flankingES 113984540 flankingEE 113984585	https://betsholtzlab.org/Publications/MouseKidenyOB/splicing/GE_Lean_6w_vs_GE_Obese_6w/A3SS/113_Fbxl2_chr9_113983985_113984041_-@chr9_113983985_113984116_-@chr9_113984541_113984585_-.pdf	Online figure
ENSMUSG00000046603.14	Tcaim	0.000452185	0.00406129	0.531	1	-0.469	chr9	+	A3SS	longExonStart_0base 122818773 longExonEnd 122819026 shortES 122818849 shortEE 122819026 flankingES 122814431 flankingEE 122814588	https://betsholtzlab.org/Publications/MouseKidenyOB/splicing/GE_Lean_6w_vs_GE_Obese_6w/A3SS/114_Tcaim_chr9_122814432_122814588_+@chr9_122818774_122819026_+@chr9_122818850_122819026_+.pdf	Online figure
ENSMUSG00000024483.17	Ankhd1	0.00658087	0.0301106	0.914	0.431	0.483	chr18	+	A3SS	longExonStart_0base 36614714 longExonEnd 36614817 shortES 36614762 shortEE 36614817 flankingES 36613832 flankingEE 36613976	https://betsholtzlab.org/Publications/MouseKidenyOB/splicing/GE_Lean_6w_vs_GE_Obese_6w/A3SS/115_Ankhd1_chr18_36613833_36613976_+@chr18_36614715_36614817_+@chr18_36614763_36614817_+.pdf	Online figure
ENSMUSG00000045503.15	Sys1	0.00016283	0.00197431	0.581	1	-0.419	chr2	+	A3SS	longExonStart_0base 164464357 longExonEnd 164467327 shortES 164467147 shortEE 164467327 flankingES 164463300 flankingEE 164463368	https://betsholtzlab.org/Publications/MouseKidenyOB/splicing/GE_Lean_6w_vs_GE_Obese_6w/A3SS/116_Sys1_chr2_164463301_164463368_+@chr2_164464358_164467327_+@chr2_164467148_164467327_+.pdf	Online figure
ENSMUSG00000034684.11	Sema3f	3.06931e-05	0.00058377	1	0	1	chr9	-	A3SS	longExonStart_0base 107684687 longExonEnd 107684816 shortES 107684687 shortEE 107684776 flankingES 107685343 flankingEE 107685547	https://betsholtzlab.org/Publications/MouseKidenyOB/splicing/GE_Lean_6w_vs_GE_Obese_6w/A3SS/117_Sema3f_chr9_107684688_107684776_-@chr9_107684688_107684816_-@chr9_107685344_107685547_-.pdf	Online figure
ENSMUSG00000019802.12	Sec63	0.00282796	0.0163281	0.557	1	-0.443	chr10	+	A3SS	longExonStart_0base 42812664 longExonEnd 42812838 shortES 42812667 shortEE 42812838 flankingES 42812435 flankingEE 42812495	https://betsholtzlab.org/Publications/MouseKidenyOB/splicing/GE_Lean_6w_vs_GE_Obese_6w/A3SS/118_Sec63_chr10_42812436_42812495_+@chr10_42812665_42812838_+@chr10_42812668_42812838_+.pdf	Online figure
ENSMUSG00000020828.12	Pld2	0.00780317	0.034095	0.117	0.705	-0.588	chr11	+	A3SS	longExonStart_0base 70555298 longExonEnd 70555381 shortES 70555331 shortEE 70555381 flankingES 70555050 flankingEE 70555164	https://betsholtzlab.org/Publications/MouseKidenyOB/splicing/GE_Lean_6w_vs_GE_Obese_6w/A3SS/119_Pld2_chr11_70555051_70555164_+@chr11_70555299_70555381_+@chr11_70555332_70555381_+.pdf	Online figure
ENSMUSG00000067369.11	Trmt2b	0.000853584	0.00617893	0.272	1	-0.728	chrX	-	A3SS	longExonStart_0base 134238142 longExonEnd 134238586 shortES 134238142 shortEE 134238242 flankingES 134240078 flankingEE 134240180	https://betsholtzlab.org/Publications/MouseKidenyOB/splicing/GE_Lean_6w_vs_GE_Obese_6w/A3SS/120_Trmt2b_chrX_134238143_134238242_-@chrX_134238143_134238586_-@chrX_134240079_134240180_-.pdf	Online figure
ENSMUSG00000023764.17	Sfi1	0.00722959	0.0321683	1	0.301	0.699	chr11	-	A3SS	longExonStart_0base 3133071 longExonEnd 3135542 shortES 3133071 shortEE 3133207 flankingES 3135653 flankingEE 3135830	https://betsholtzlab.org/Publications/MouseKidenyOB/splicing/GE_Lean_6w_vs_GE_Obese_6w/A3SS/121_Sfi1_chr11_3133072_3133207_-@chr11_3133072_3135542_-@chr11_3135654_3135830_-.pdf	Online figure
ENSMUSG00000024426.16	Atat1	6.10275e-06	0.000234636	0	1	-1	chr17	-	A3SS	longExonStart_0base 35898256 longExonEnd 35898350 shortES 35898256 shortEE 35898299 flankingES 35901367 flankingEE 35901611	https://betsholtzlab.org/Publications/MouseKidenyOB/splicing/GE_Lean_6w_vs_GE_Obese_6w/A3SS/122_Atat1_chr17_35898257_35898299_-@chr17_35898257_35898350_-@chr17_35901368_35901611_-.pdf	Online figure
ENSMUSG00000037275.13	Gemin5	7.64409e-05	0.00105925	0	1	-1	chr11	-	A3SS	longExonStart_0base 58122281 longExonEnd 58122378 shortES 58122281 shortEE 58122375 flankingES 58124931 flankingEE 58125418	https://betsholtzlab.org/Publications/MouseKidenyOB/splicing/GE_Lean_6w_vs_GE_Obese_6w/A3SS/123_Gemin5_chr11_58122282_58122375_-@chr11_58122282_58122378_-@chr11_58124932_58125418_-.pdf	Online figure
ENSMUSG00000018501.16	Ncor1	1.14555e-05	0.000370395	0.809	0	0.809	chr11	-	A3SS	longExonStart_0base 62327105 longExonEnd 62327249 shortES 62327105 shortEE 62327246 flankingES 62329440 flankingEE 62329652	https://betsholtzlab.org/Publications/MouseKidenyOB/splicing/GE_Lean_6w_vs_GE_Obese_6w/A3SS/124_Ncor1_chr11_62327106_62327246_-@chr11_62327106_62327249_-@chr11_62329441_62329652_-.pdf	Online figure
ENSMUSG00000018501.16	Ncor1	5.35046e-05	0.000826447	0	1	-1	chr11	-	A3SS	longExonStart_0base 62373075 longExonEnd 62373574 shortES 62373075 shortEE 62373454 flankingES 62376634 flankingEE 62376761	https://betsholtzlab.org/Publications/MouseKidenyOB/splicing/GE_Lean_6w_vs_GE_Obese_6w/A3SS/125_Ncor1_chr11_62373076_62373454_-@chr11_62373076_62373574_-@chr11_62376635_62376761_-.pdf	Online figure
ENSMUSG00000018501.16	Ncor1	4.62839e-05	0.000760938	0	1	-1	chr11	-	A3SS	longExonStart_0base 62373075 longExonEnd 62373622 shortES 62373075 shortEE 62373454 flankingES 62376634 flankingEE 62376761	https://betsholtzlab.org/Publications/MouseKidenyOB/splicing/GE_Lean_6w_vs_GE_Obese_6w/A3SS/126_Ncor1_chr11_62373076_62373454_-@chr11_62373076_62373622_-@chr11_62376635_62376761_-.pdf	Online figure
ENSMUSG00000002059.16	Rab34	0.000464458	0.00413325	0.502	1	-0.498	chr11	+	A3SS	longExonStart_0base 78191574 longExonEnd 78191682 shortES 78191610 shortEE 78191682 flankingES 78191364 flankingEE 78191455	https://betsholtzlab.org/Publications/MouseKidenyOB/splicing/GE_Lean_6w_vs_GE_Obese_6w/A3SS/127_Rab34_chr11_78191365_78191455_+@chr11_78191575_78191682_+@chr11_78191611_78191682_+.pdf	Online figure
ENSMUSG00000020692.13	Nle1	0.000632306	0.00512779	1	0.488	0.512	chr11	-	A3SS	longExonStart_0base 82902994 longExonEnd 82903197 shortES 82902994 shortEE 82903133 flankingES 82904089 flankingEE 82904136	https://betsholtzlab.org/Publications/MouseKidenyOB/splicing/GE_Lean_6w_vs_GE_Obese_6w/A3SS/128_Nle1_chr11_82902995_82903133_-@chr11_82902995_82903197_-@chr11_82904090_82904136_-.pdf	Online figure
ENSMUSG00000045983.14	Eif4g1	0.0103036	0.041849	0.31	1	-0.69	chr16	+	A3SS	longExonStart_0base 20674167 longExonEnd 20674314 shortES 20674227 shortEE 20674314 flankingES 20673867 flankingEE 20673961	https://betsholtzlab.org/Publications/MouseKidenyOB/splicing/GE_Lean_6w_vs_GE_Obese_6w/A3SS/129_Eif4g1_chr16_20673868_20673961_+@chr16_20674168_20674314_+@chr16_20674228_20674314_+.pdf	Online figure
ENSMUSG00000017801.14	Mlx	0.000226891	0.00258923	0.784	0.223	0.561	chr11	+	A3SS	longExonStart_0base 101088592 longExonEnd 101088704 shortES 101088597 shortEE 101088704 flankingES 101087753 flankingEE 101087790	https://betsholtzlab.org/Publications/MouseKidenyOB/splicing/GE_Lean_6w_vs_GE_Obese_6w/A3SS/130_Mlx_chr11_101087754_101087790_+@chr11_101088593_101088704_+@chr11_101088598_101088704_+.pdf	Online figure
ENSMUSG00000020687.12	Cdc27	0.00040879	0.00383677	0.422	0	0.422	chr11	-	A3SS	longExonStart_0base 104526050 longExonEnd 104526184 shortES 104526050 shortEE 104526166 flankingES 104526862 flankingEE 104526977	https://betsholtzlab.org/Publications/MouseKidenyOB/splicing/GE_Lean_6w_vs_GE_Obese_6w/A3SS/131_Cdc27_chr11_104526051_104526166_-@chr11_104526051_104526184_-@chr11_104526863_104526977_-.pdf	Online figure
ENSMUSG00000050106.16	Tmc8	0.00326615	0.0180009	0.136	0.715	-0.579	chr11	+	A3SS	longExonStart_0base 117784109 longExonEnd 117784195 shortES 117784112 shortEE 117784195 flankingES 117783770 flankingEE 117783920	https://betsholtzlab.org/Publications/MouseKidenyOB/splicing/GE_Lean_6w_vs_GE_Obese_6w/A3SS/132_Tmc8_chr11_117783771_117783920_+@chr11_117784110_117784195_+@chr11_117784113_117784195_+.pdf	Online figure
ENSMUSG00000005882.17	Uqcc1	0.000483065	0.00425975	0	0.739	-0.739	chr2	-	A3SS	longExonStart_0base 155910356 longExonEnd 155910467 shortES 155910356 shortEE 155910464 flankingES 155911740 flankingEE 155911836	https://betsholtzlab.org/Publications/MouseKidenyOB/splicing/GE_Lean_6w_vs_GE_Obese_6w/A3SS/133_Uqcc1_chr2_155910357_155910464_-@chr2_155910357_155910467_-@chr2_155911741_155911836_-.pdf	Online figure
ENSMUSG00000061306.14	Slc38a10	6.4854e-05	0.000982943	0	1	-1	chr11	-	A3SS	longExonStart_0base 120108466 longExonEnd 120108553 shortES 120108466 shortEE 120108490 flankingES 120109431 flankingEE 120109536	https://betsholtzlab.org/Publications/MouseKidenyOB/splicing/GE_Lean_6w_vs_GE_Obese_6w/A3SS/134_Slc38a10_chr11_120108467_120108490_-@chr11_120108467_120108553_-@chr11_120109432_120109536_-.pdf	Online figure
ENSMUSG00000020659.14	Cbll1	0.00831021	0.0361475	0.485	1	-0.515	chr12	-	A3SS	longExonStart_0base 31492078 longExonEnd 31492179 shortES 31492078 shortEE 31492176 flankingES 31494590 flankingEE 31494749	https://betsholtzlab.org/Publications/MouseKidenyOB/splicing/GE_Lean_6w_vs_GE_Obese_6w/A3SS/135_Cbll1_chr12_31492079_31492176_-@chr12_31492079_31492179_-@chr12_31494591_31494749_-.pdf	Online figure
ENSMUSG00000079036.9	Alkbh1	0.00568484	0.0270308	1	0.485	0.515	chr12	-	A3SS	longExonStart_0base 87431399 longExonEnd 87431593 shortES 87431399 shortEE 87431538 flankingES 87434118 flankingEE 87434209	https://betsholtzlab.org/Publications/MouseKidenyOB/splicing/GE_Lean_6w_vs_GE_Obese_6w/A3SS/136_Alkbh1_chr12_87431400_87431538_-@chr12_87431400_87431593_-@chr12_87434119_87434209_-.pdf	Online figure
ENSMUSG00000020873.12	Slc35b1	1.71146e-06	8.73748e-05	0.967	0.498	0.469	chr11	+	A3SS	longExonStart_0base 95386485 longExonEnd 95386616 shortES 95386510 shortEE 95386616 flankingES 95385800 flankingEE 95385904	https://betsholtzlab.org/Publications/MouseKidenyOB/splicing/GE_Lean_6w_vs_GE_Obese_6w/A3SS/137_Slc35b1_chr11_95385801_95385904_+@chr11_95386486_95386616_+@chr11_95386511_95386616_+.pdf	Online figure
ENSMUSG00000029209.14	Gnpda2	0.00620643	0.0288546	1	0.289	0.711	chr5	-	A3SS	longExonStart_0base 69579507 longExonEnd 69582293 shortES 69579507 shortEE 69579686 flankingES 69584973 flankingEE 69585156	https://betsholtzlab.org/Publications/MouseKidenyOB/splicing/GE_Lean_6w_vs_GE_Obese_6w/A3SS/138_Gnpda2_chr5_69579508_69579686_-@chr5_69579508_69582293_-@chr5_69584974_69585156_-.pdf	Online figure
ENSMUSG00000029705.16	Cux1	4.31961e-07	3.11692e-05	1	0.387	0.613	chr5	-	A3SS	longExonStart_0base 136312642 longExonEnd 136313314 shortES 136312642 shortEE 136313008 flankingES 136314306 flankingEE 136314403	https://betsholtzlab.org/Publications/MouseKidenyOB/splicing/GE_Lean_6w_vs_GE_Obese_6w/A3SS/139_Cux1_chr5_136312643_136313008_-@chr5_136312643_136313314_-@chr5_136314307_136314403_-.pdf	Online figure
ENSMUSG00000029705.16	Cux1	6.28921e-06	0.000234636	0.837	0.177	0.66	chr5	-	A3SS	longExonStart_0base 136326749 longExonEnd 136327010 shortES 136326749 shortEE 136326932 flankingES 136332623 flankingEE 136332728	https://betsholtzlab.org/Publications/MouseKidenyOB/splicing/GE_Lean_6w_vs_GE_Obese_6w/A3SS/140_Cux1_chr5_136326750_136326932_-@chr5_136326750_136327010_-@chr5_136332624_136332728_-.pdf	Online figure
ENSMUSG00000029705.16	Cux1	0.000108242	0.00136367	0.447	0.039	0.408	chr5	-	A3SS	longExonStart_0base 136326749 longExonEnd 136327010 shortES 136326749 shortEE 136326938 flankingES 136332623 flankingEE 136332728	https://betsholtzlab.org/Publications/MouseKidenyOB/splicing/GE_Lean_6w_vs_GE_Obese_6w/A3SS/141_Cux1_chr5_136326750_136326938_-@chr5_136326750_136327010_-@chr5_136332624_136332728_-.pdf	Online figure
ENSMUSG00000040040.15	Ift88	1.86063e-07	1.80481e-05	1	0	1	chr14	+	A3SS	longExonStart_0base 57437176 longExonEnd 57437283 shortES 57437226 shortEE 57437283 flankingES 57434794 flankingEE 57434857	https://betsholtzlab.org/Publications/MouseKidenyOB/splicing/GE_Lean_6w_vs_GE_Obese_6w/A3SS/142_Ift88_chr14_57434795_57434857_+@chr14_57437177_57437283_+@chr14_57437227_57437283_+.pdf	Online figure
ENSMUSG00000022255.14	Mtdh	0.00183545	0.01134	0.561	1	-0.439	chr15	+	A3SS	longExonStart_0base 34114023 longExonEnd 34118110 shortES 34117879 shortEE 34118110 flankingES 34099483 flankingEE 34099585	https://betsholtzlab.org/Publications/MouseKidenyOB/splicing/GE_Lean_6w_vs_GE_Obese_6w/A3SS/143_Mtdh_chr15_34099484_34099585_+@chr15_34114024_34118110_+@chr15_34117880_34118110_+.pdf	Online figure
[truncated: 126 more rows]

## Sheet: GEC 11w
GeneID	geneSymbol	PValue	FDR	IncLevel1	IncLevel2	IncLevelDifference	chr	strand	splicingType	coordinates		Online figure
[truncated: 972 more rows]

## Sheet: GEC 20w
GeneID	geneSymbol	PValue	FDR	IncLevel1	IncLevel2	IncLevelDifference	chr	strand	splicingType	coordinates		Online figure
[truncated: 1,059 more rows]

## Sheet: PCEC 6w
GeneID	geneSymbol	PValue	FDR	IncLevel1	IncLevel2	IncLevelDifference	chr	strand	splicingType	coordinates		Online figure
[truncated: 1,007 more rows]

## Sheet: PCEC 11w
GeneID	geneSymbol	PValue	FDR	IncLevel1	IncLevel2	IncLevelDifference	chr	strand	splicingType	coordinates		Online figure
[truncated: 924 more rows]

[truncated: 1 more sheets: PCEC 20w]
